# Supplementary material for: Breast Cancer-Derived Microparticles Reduce Cancer Cell Adhesion, an Effect Augmented by Chemotherapy
Source: MDPI journal article supplement (doi:10.3390/cells9102269), 2020-10-10
Supplement: s1 [file s1]

| LQ intensity | T: Protein IDs  | T: Majority protein IDs | T: Protein names   | T: Gene names |
|--------------|--------------|--------------|--------------|--------------|--------------|--------------|--------------|--------------|--------------|--------------|--------------|--------------|-----------------|-------------------------|--------------------|---------------|
| LM1_1        | LM_2         | LM_3         | LM1_1_ptx    | LM_2_ptx     | LM_3_ptx     | MDA_1        | MDA_2        | MDA_3        | MDA_1_ptx    | MDA_2_ptx    | MDA_3_ptx    |              |                 |                         |                    |               |
| NaN          | 25.4332      | NaN          | NaN          | NaN          | NaN          | NaN          | P01023          | P01023                  | Alpha-2-macroglo   | A2M           |
|              | 25.1873      | 24.5558      | 24.9442      | 25.1605      | 24.6585      | 24.9514      | 24.5952      | NaN          | 24.4933      | 25.303       | 24.6894      | 25.3033      | Q86V21;Q86V21-1 | Q86V21;Q86V21-1         | Acetoacetyl-CoA s  | AACS          |
| NaN          | NaN          | NaN          |              | 21.7466      | NaN          | Q7RTV5;H0Y5J5   | Q7RTV5;H0Y5J5           | Thioredoxin-like p | AAED1         |
| NaN          | NaN          | NaN          |              | 21.8163      | NaN          | Q6PD74          | Q6PD74                  | Alpha- and gamm    | AAGAB         |
| NaN          | NaN          |              | 22.4893      | NaN          | 23.2936      | NaN          | NaN          | NaN          | 23.4554      | NaN          | NaN          | NaN          | Q6ZSR9;A0A096L1 | Q6ZSR9;A0A096L1         | Uncharacterized p  | AAK1          |
|              | 24.3818      | 24.5276      | 24.5339      | 24.387       | 24.6533      | 24.5541      | 24.546       | 24.6077      | 24.86        | 24.1256      | 24.0593      | 24.9778      | Q2M218;E9PG46;1 | Q2M218;E9PG46;1         | AP2-associated p   | AAK1          |
| NaN          | Q9H7C9;E9NP31;1 | Q9H7C9;E9NP31;1         | Mth938 domain-c    | AAMDC         |
|              | 25.8845      | 24.5247      | 25.2159      | 25.7264      | 24.2585      | 25.1661      | 25.0199      | 25.1888      | 24.2616      | 25.2391      | 25.0416      | 24.5497      | Q13685;C9IG97;C | Q13685;C9IG97;C         | Angio-associated   | AAMP          |
|              | 25.4032      | 25.2019      | 25.2531      | 25.4626      | 25.4835      | 25.2537      | 25.1019      | 25.1582      | 25.1826      | 25.4722      | 25.9075      | 25.6071      | Q9Y312;A2A2Q9   | Q9Y312;A2A2Q9           | Protein AAR2 hor   | AAR2          |
|              | 29.6145      | 29.3989      | 29.3122      | 29.3291      | 29.1553      | 29.1445      | 29.7959      | 29.7463      | 29.4042      | 29.8257      | 29.7665      | 29.5165      | P49588;P49588-2 | P49588;P49588-2         | Alanine--tRNA lig  | AARS          |
|              | 21.4686      | NaN          |              | 21.3273      | 21.8845      | NaN          | NaN          | NaN          | NaN          | 20.7888      | NaN          | NaN          | Q5JT29          | Q5JT29                  | Alanine--tRNA lig  | AARS2         |
|              | 26.3145      | 25.9423      | 25.9006      | 26.492       | 26.3259      | 25.9017      | 25.3928      | 24.3869      | 25.2625      | 26.2773      | 26.1741      | 24.5623      | Q9BTE6-2;C9J5N1 | Q9BTE6-2;C9J5N1         | Alanyl-tRNA edito  | AARS1;PTGES3L |
|              | 26.8333      | 26.812       | 26.727       | 27.021       | 26.6895      | 26.9896      | 26.2565      | 26.3346      | 26.7572      | 27.1492      | 26.966       | 26.5235      | Q9NRN7;E9PNF3;1 | Q9NRN7;E9PNF3;1         | L-aminoadipate-s   | AASDHPPPT     |
|              | 26.5272      | 25.9803      |              | 26.6487      | 25.9748      | 26.384       | NaN          | NaN          | NaN          | NaN          | NaN          | NaN          | Q9UDR5;F8WAH1   | Q9UDR5;F8WAH1           | Alpha-aminoadipi   | AASS          |
|              | 23.073       | NaN          | NaN          | 23.2061      | NaN          | 22.5641      | Q9NYG61;A0A087V | Q9NYG61;A0A087V         | Protein AATF       | AATF          |
| NaN          |              | 24.3547      | NaN          | Q86UQ4;A0A0A0I  | Q86UQ4;A0A0A0I          | ATP-binding casse  | ABCA13        |
|              | 25.0909      | 23.9615      | 24.8959      | 24.6726      | NaN          | 24.8         | 23.0602      | NaN          | NaN          | NaN          | 23.4361      | 22.9478      | Q9NP58;Q9NP58-  | Q9NP58;Q9NP58-          | ATP-binding casse  | ABCB6         |
|              | 28.6869      | 28.0898      | 29.2577      | 29.1711      | 28.5897      | 29.4487      | 28.3769      | 27.8438      | 28.4793      | 29.6262      | 28.9515      | 29.195       | P33527;P33527-3 | P33527;P33527-3         | Multidrug resistar | ABCC1         |
|              | 26.9773      | 25.689       | 27.1545      | 27.3753      | 26.5003      | 27.2142      | 25.8415      | 24.6289      | 25.6528      | 27.2218      | 26.3979      | 26.7768      | O15439;O15439-2 | O15439;O15439-2         | Multidrug resistar | ABCC4         |
|              | 23.1769      | 23.1096      | 23.973       | 23.744       | 23.5537      | 23.8145      | NaN          | NaN          | NaN          | 24.0938      | 23.7285      | 24.1948      | O15440;O15440-5 | O15440;O15440-5         | Multidrug resistar | ABCC5         |
|              | 25.7378      | 24.6922      | 25.6878      | 25.9509      | 24.5705      | 25.5068      | 25.858       | NaN          | NaN          | 25.3384      | 25.754       | 24.7486      | P28288;P28288-2 | P28288;P28288-2         | ATP-binding casse  | ABCD3         |
|              | 22.9511      | NaN          |              | 23.2557      | 23.0804      | 22.8321      | NaN          | NaN          | NaN          | 23.9669      | 23.1668      | 23.4809      | O14678;H0YJ82;H | O14678                  | ATP                |               |



|         |         |         |         |         |         |         |         |         |         |         |         |                   |                   |                                                 |                                |       |
|---------|---------|---------|---------|---------|---------|---------|---------|---------|---------|---------|---------|-------------------|-------------------|-------------------------------------------------|--------------------------------|-------|
| 28.4194 | 28.071  | 28.2698 | 28.375  | 28.1391 | 28.4992 | 27.5899 | 27.2754 | 27.6572 | 27.506  | 27.5153 | 27.6114 | P21399            | P21399            | Cytoplasmic aconitase                           | ACO1                           |       |
| 25.7805 | 26.9152 | 26.1687 | 25.8236 | 26.7231 | 26.1978 | 25.4416 | 26.3889 | 27.155  | 25.7498 | 26.2517 | 26.6948 | Q99798;A2A274     | Q99798;A2A274     | Aconitate hydratase                             | ACO2                           |       |
| 24.6967 | 25.4866 | 25.0935 | 24.6009 | 25.5219 | 25.0191 | 24.9938 |         | 24.6536 | 24.9406 |         | 25.4178 | Q86TX2;AOA087X    | Q86TX2;AOA087X    | Acyl-coenzyme A synthetase                      | ACOT1;ACOT2                    |       |
| 24.7605 | 24.7036 | 24.0984 | 24.4559 | 24.5231 | 24.0741 | NaN     | NaN     | NaN     | 24.1086 | 23.5694 | 23.1152 | Q9NPJ3;Q9NPJ3-2   | Q9NPJ3;Q9NPJ3-2   | Acyl-coenzyme A synthetase                      | ACOT13                         |       |
| 28.2902 | 28.316  | 27.9124 | 27.7992 | 28.2673 | 27.8289 | 27.9066 | 27.7307 | 27.9097 | 28.3801 | 28.5874 | 27.6766 | O00154-4;O00154-4 | O00154-4;O00154-4 | Cytosolic acyl-coenzyme A synthetase            | ACOT7                          |       |
| 23.0264 | 23.2617 | 23.1739 | 22.9387 | 22.7741 | 23.0687 | NaN     | NaN     | NaN     | NaN     | 22.9277 | NaN     | O14734;E9PIN0;H   | O14734;E9PIN0;H   | Acyl-coenzyme A synthetase                      | ACOT8                          |       |
| 29.1145 | 28.4963 | 28.7318 | 29.5875 | 28.7477 | 28.8856 | 27.0411 | 27.5577 | 28.4058 | 28.231  | 28.0433 | 27.6585 | Q9Y305;Q9Y305-2   | Q9Y305;Q9Y305-2   | Acyl-coenzyme A synthetase                      | ACOT9                          |       |
| 23.6422 | 24.212  | 23.4167 | 23.7419 | 23.6938 | 23.735  | 23.9977 | NaN     | 25.1543 | 23.2684 | 22.5436 | NaN     | Q15067;Q15067-2   | Q15067;Q15067-2   | Peroxisomal acyl-coenzyme A synthetase          | ACOX1                          |       |
| 26.6637 | 26.975  | 26.6471 | 26.3656 | 26.7216 | 26.5301 | 26.6103 | 26.1901 | 26.7524 | 26.9728 | 27.0269 | 26.4086 | P24666;G5E9R5;P   | P24666;G5E9R5;P   | Low molecular weight acyl-coenzyme A synthetase | ACP1                           |       |
| 24.5186 | 24.207  | 24.7391 | 24.4653 | 24.0978 | 24.8456 | 24.1306 | NaN     | 24.7426 | 24.5191 | 24.2833 | NaN     | P11117;E9PP23;E   | P11117;E9PP23;E   | Lysosomal acid phosphatase                      | ACP2                           |       |
| 21.7754 | NaN     | Q96CM8;E9PF16;I   | Q96CM8;E9PF16;I   | Acyl-CoA synthetase                             | ACSF2                          |       |
| 22.5991 | NaN     | NaN     | 22.5471 | 22.8622 | 22.7453 | NaN     | 22.8228 | NaN     | NaN     | 22.7752 | NaN     | P33121;E7EPM6;F   | P33121;E7EPM6;F   | Long-chain fatty-acyl-CoA synthetase            | ACSL1                          |       |
| 28.1005 | 27.4265 | 27.8161 | 28.2812 | 27.5034 | 27.9118 | 28.6369 | 28.4549 | 28.0688 | 28.7793 | 28.0921 | 27.5943 | O95573;F5GWH2;I   | O95573;F5GWH2;I   | Long-chain fatty-acyl-CoA synthetase            | ACSL3                          |       |
| 30.0349 | 29.6228 | 30.3911 | 30.1072 | 29.6214 | 30.3908 | 30.1823 | 30.0052 | 29.5831 | 30.8723 | 30.1823 | 29.755  | O60488;O60488-2   | O60488;O60488-2   | Long-chain fatty-acyl-CoA synthetase            | ACSL4                          |       |
| 26.8748 | 26.6487 | 26.6688 | 27.0514 | 26.8899 | 26.7171 | 27.3796 | 27.7821 | 28.0058 | 27.4071 | 26.9476 | 27.5341 | Q9ULC5;Q9ULC5-2   | Q9ULC5;Q9ULC5-2   | Long-chain fatty-acyl-CoA synthetase            | ACSL5                          |       |
| 25.7243 | 25.3979 | 25.5881 | 25.5185 | 25.2175 | 25.71   | 26.1184 | NaN     | 25.7974 | 26.4681 | 26.0451 | 25.908  | Q9NR19;Q9NR19-2   | Q9NR19;Q9NR19-2   | Acetyl-coenzyme A synthetase                    | ACSS2                          |       |
| 22.7401 | NaN     | NaN     | 21.1689 | 22.4923 | NaN     | NaN     | NaN     | NaN     | 22.9982 | 22.7334 | NaN     | Q9H6R3;AOA084J    | Q9H6R3;AOA084J    | Acyl-CoA synthetase                             | ACSS3                          |       |
| NaN     | NaN     | NaN     | NaN     | 27.8683 | NaN     | P60709;E7EVS6;G   | P60709;E7EVS6;G   | Actin, cytoplasmic                              | ACTB                           |       |
| 24.171  | 26.3226 | 26.8231 | 25.235  | 26.9499 | 26.469  | 25.3383 | 26.2446 | 25.6147 | 26.885  | 26.7478 | 26.5093 | Q562R1            | Q562R1            | Beta-actin-like protein                         | ACTB2                          |       |
| 29.7581 | 31.2681 | 32.5168 | 31.9341 | 31.1621 | 32.5352 | 31.8116 | 31.0679 | 30.5386 | 32.5903 | 32.3599 | 31.1195 | P68032;P68133;P   | P68032;P68133;P   | Actin, alpha cardiac                            | ACTC1;ACTA1;ACTA2              |       |
| 36.4639 | 36.5603 | 36.8542 | 36.5344 | 36.7482 | 37.1067 | 36.5224 | 36.3579 | 36.2928 | 37.0264 | 37.163  | 36.6594 | P63261;I3L310;I3L | P63261;I3L310;I3L | Actin, cytoplasmic                              | ACTG1                          |       |
| 27.2906 | 27.2228 | 26.8905 | 26.9014 | 26.9093 | 27.0349 | 26.4228 | 26.5592 | 25.9151 | 27.3145 | 27.5223 | 26.5088 | O96019;O96019-2   | O96019;O96019-2   | Actin-like protein                              | ACTL6A                         |       |
| 32.5413 | 32.0145 | 32.6936 | 32.692  | 32.054  | 32.7859 | 32.6097 | 31.6103 | 31.1849 | 33.1418 | 32.5267 | 31.9418 | P12814;P12814-2   | P12814;P12814-2   | Alpha-actinin-1                                 | ACTN1                          |       |
| NaN     | NaN     | NaN     | NaN     | 22.4918 | NaN     | K7EJH8            | K7EJH8            | Actin                                           | ACTN4                          |       |
| 32.8682 | 32.3294 | 32.9608 | 32.9822 | 32.0951 | 33.0618 | 33.1895 | 31.7603 | 31.408  | 34.0577 | 33.1407 | 32.2027 | O43707;O43707-2   | O43707;O43707-2   | Alpha-actinin-4                                 | ACTN4                          |       |
| 24.6639 | 24.5834 | 24.6647 | 24.5352 | 24.3503 | 24.7479 | 25.3276 | NaN     | NaN     | 25.7011 | 25.1145 | 24.5548 | Q9NZ32;V9GYX7;I   | Q9NZ32;V9GYX7;I   | Actin-related protein                           | ACTR10                         |       |
| 29.0827 | 29.3965 | 29.3691 | 28.8524 | 29.7428 | 29.4341 | 29.405  | 29.8198 | 29.7803 | 29.732  | 29.8611 | 29.4894 | P61163;R4GMTO     | P61163;R4GMTO     | Alpha-actinin-1                                 | ACTR1A                         |       |
| 26.0977 | 25.9972 | 25.8429 | 25.5224 | 26.4877 | 25.9981 | 26.3442 | 27.0045 | 26.4045 | 26.3571 | 26.7066 | 26.9923 | P42025            | P42025            | Beta-actinin-1                                  | ACTR1B                         |       |
| 29.6544 | 29.7192 | 29.9375 | 29.6941 | 29.8379 | 30.0225 | 30.1794 | 29.9446 | 29.9811 | 30.4117 | 30.2442 | 30.0515 | P61160;P61160-2   | P61160;P61160-2   | Actin-related protein                           | ACTR2                          |       |
| 29.8244 | 30.1814 | 29.9296 | 29.5641 | 30.0706 | 30.0603 | 30.1806 | 30.2023 | 29.655  | 30.7015 | 30.7015 | 30.2293 | P61158;B4DXW1;I   | P61158;B4DXW1;I   | Actin-related protein                           | ACTR3                          |       |
| 22.6423 | NaN     | 21.7901 | 22.4367 | NaN     | 22.1332 | NaN     | NaN     | NaN     | NaN     | NaN     | 22.2368 | NaN               | Q9H9F9            | Q9H9F9                                          | Actin-related protein          | ACTR5 |
| NaN     | NaN     | NaN     | 20.7828 | NaN               | Q9GZN1;F8W057;I   | Q9GZN1;F8W057;I                                 | Actin-related protein          | ACTR6 |
| 23.3273 | 23.3652 | 23.6349 | 23.2198 | NaN     | NaN     | NaN     | NaN     | NaN     | NaN     | 23.837  | NaN     | NaN               | Q04771            | Q04771                                          | Actin receptor tyrosine kinase | ACVR1 |
| 25.8806 | 26.7286 | 26.0045 | 25.5379 | 26.6068 | 26.2058 | 26.7242 | 27.1598 | 27.5251 | 26.3463 | 26.5929 | 27.3065 | Q03154;Q03154-2   | Q03154;Q03154-2   | Aminoacylase-1                                  | ACY1                           |       |
| 25.2969 | 25.1468 | 24.8247 | 24.7595 | 24.1979 | 24.9071 | 25.2928 | NaN     | NaN     | 24.8982 | 23.7945 | 24.3378 | P07311;G3V2U7     | P07311;G3V2U7     | Acylphosphatase                                 | ACYP1                          |       |
| 22.5789 | NaN     | 23.1844 | 22.6407 | NaN     | 23.5424 | NaN     | NaN     | NaN     | 24.2426 | 22.9122 | NaN     | P14621;U3KQL2;I   | P14621;U3KQL2;I   | Acylphosphatase                                 | ACYP2                          |       |
| 28.118  | 28.0717 | 28.4964 | 27.9955 | 27.7557 | 28.5773 | 28.3288 | 28.0293 | 29.137  | 28.1459 | 27.8184 | 28.4214 | O14672;O14672-2   | O14672;O14672-2   | Disintegrin and metalloprotease                 | ADAM10                         |       |
| NaN     | 26.3722 | NaN     | 28.7445 | 25.6349 | NaN     | Q43184;Q5JRP2;C   | Q43184;Q5JRP2;C   | Disintegrin and metalloprotease                 | ADAM12                         |       |
| 23.397  | NaN     | 24.4937 | 23.9064 | NaN     | 24.3406 | 24.6645 | 24.6621 | 24.6326 | 23.9627 | 23.8634 | 24.9859 | Q13444;Q13444-2   | Q13444;Q13444-2   | Disintegrin and metalloprotease                 | ADAM15                         |       |
| 25.2575 | 25.6026 | 26.3272 | 25.4643 | 25.7756 | 26.3212 | 26.2545 | 26.4837 | 26.0406 | 26.9122 | 26.2869 | 26.5948 | P78536;P78536-2   | P78536;P78536-2   | Disintegrin and metalloprotease                 | ADAM17                         |       |
| 26.3411 | 26.472  | 26.7111 | 26.2177 | 26.8326 | 26.7001 | 26.6706 | 26.1112 | 27.1684 | 26.3622 | 26.1571 | 26.5125 | Q13443;F8WC54;I   | Q13443;F8WC54;I   | Disintegrin and metalloprotease                 | ADAM9                          |       |
| 25.7149 | 24.4772 | 25.7978 | 25.4885 | 25.005  | 24.7197 | 27.6079 | 27.0408 | 25.6556 | 26.1156 | 26.2181 | 25.7329 | Q9UH8;E5RJR7;E    | Q9UH8             | Disintegrin and metalloprotease                 | ADAMT51                        |       |
| 24.5999 | 23.8139 | 24.8609 | 25.9406 | 25.2332 | NaN     | NaN     | NaN     | NaN     | 24.0402 | 24.31   | 24.5255 | P55265;P55265-5   | P55265;P55265-5   | Double-stranded RNA binding protein             | ADAR                           |       |
| 24.5892 | 24.7011 | 25.9498 | 24.5334 | 25.0884 | 25.4762 | 25.2701 | NaN     | NaN     | 25.1383 | 25.2765 | 25.023  | O60266;U3KQ91;I   | O60266;U3KQ91;I   | Adenylate cyclase                               | ADCY3                          |       |
| NaN     | NaN     | 22.6239 | NaN     | NaN     | NaN     | NaN     | NaN     | NaN     | 23.3037 | 22.5045 | NaN     | P51828;F5H699;H   | P51828;F5H699;H   | Adenylate cyclase                               | ADCY7                          |       |
| NaN     | 22.4064 | NaN     | NaN     | O60503;I3L342;I   | O60503            | Adenylate cyclase                               | ADCY9                          |       |
| 24.2383 | 24.8768 | 25.4283 | 24.6387 | 24.8893 | 25.0444 | 24.8955 | NaN     | 25.0283 | 24.9169 | 24.5061 | 24.5547 | E7ENY0;P35611-6   | E7ENY0;P35611-6   | Alpha-adducin                                   | ADD1                           |       |
| 23.4747 | 24.5487 | 24.8347 | 24.0228 | 24.4713 | 24.6183 | 24.0608 | 23.9176 | 24.0725 | 23.6659 | 24.0566 | NaN     | AOA087WX08;Q9I    | AOA087WX08;Q9I    | Gamma-adducin                                   | ADD3                           |       |
| 27.8104 | 27.7696 | 27.5039 | 27.5554 | 27.6783 | 27.6359 | 27.526  | 27.4927 | 28.117  | 28.3155 | 28.4733 | 28.1282 | P11766;H0YAG8;E   | P11766            | Alcohol dehydrogenase                           | ADH5                           |       |
| NaN     | NaN     | NaN     | NaN     | NaN     | NaN     | 24.2284 | NaN     | NaN     | NaN     | NaN     | NaN     | P28332;Q8IUN7;E   | P28332;Q8IUN7;E   | Alcohol dehydrogenase                           | ADH6                           |       |
| 24.6364 | 25.4806 | 24.9596 | 24.5799 | 25.3479 | 25.1871 | 26.3492 | 25.2541 | 26.0126 | 26.4672 | 25.3833 | 25.2286 | Q9BV57;Q9BV57-2   | Q9BV57;Q9BV57-2   | 1,2-dihydroxy-3-ketoadipate                     | ADH1                           |       |
| 19.8594 | NaN     | Q96A54;F8W782;I   | Q96A54;F8W782;I   | Adiponectin receptor                            | ADIPOR1                        |       |
| 28.0718 | 27.5843 | 27.2513 | 27.2754 | 27.3482 | 27.3217 | 27.1325 | 26.7567 | 26.9679 | 27.8806 | 27.8112 | 26.6792 | P55263;P55263-3   | P55263;P55263-3   | Adenosine kinase                                | ADK                            |       |
| 23.7649 | 25.6513 | 25.3652 | 23.486  | 24.3623 | 24.2713 | 27.0875 | 28.2798 | 23.2908 | NaN     | NaN     | NaN     | P35318;E9PL83;E   | P35318;E9PL83;E   | Adrenomedullary lipase                          | ADM                            |       |
| 24.6816 | NaN     | 24.1678 | 24.9457 | 24.2917 | NaN     | Q9H2P0;E9PQK8     | Q9H2P0            | Activity-dependent protein kinase               | ADNP                           |       |
| 23.4055 | 23.5066 | 23.5657 | 23.2184 | 23.2407 | NaN     | 24.1108 | NaN     | NaN     | 23.9119 | 23.8731 | 23.8612 | Q96S25            | Q96S25            | 2-aminoethanethiolase                           | ADO                            |       |
| 23.5884 | 23.7727 | 23.5608 | 23.6013 | 23.9919 | NaN     | NaN     | NaN     | 24.4849 | 23.4603 | 23.869  | 23.9894 | Q9BR6;Q9BR6-6     | Q9BR6;Q9BR6-6     | ADP-dependent protein kinase                    | ADPGK                          |       |
| 23.6845 | 24.9977 | 24.5663 | 23.9078 | 24.7636 | 24.5262 | 25.0078 | 24.8717 | 24.6415 | 24.7903 | 24.3966 | 25.1539 | Q9NX46            | Q9NX46            | Poly(ADP-ribose) polymerase                     | ADPRH2                         |       |
| 24.7878 | NaN     | 25.2175 | 25.2744 | 24.3327 | 26.0025 | 24.8334 | NaN     | 25.0199 | 25.7393 | 25.0504 | 24.9313 | P07550            | P07550            | Beta-2 adrenergic receptor                      | ADRB2                          |       |
| 23.2884 | 23.312  | 23.9873 | 24.1567 | 23.3229 | 24.8431 | NaN     | NaN     | NaN     | 23.8431 | 23.7961 | NaN     | P25098;E9PRV7;P   | P25098;E9PRV7     | Beta-adrenergic receptor                        | ADRBK1                         |       |



|     |         |         |         |         |         |         |         |         |         |         |         |         |                  |                  |                      |               |
|-----|---------|---------|---------|---------|---------|---------|---------|---------|---------|---------|---------|---------|------------------|------------------|----------------------|---------------|
|     | 25.1608 | 26.0611 | 25.9322 | 26.0905 | 26.2736 | 25.6104 | 25.9298 | 25.129  | 26.333  | 25.9298 | 26.4749 | 26.435  | Q16186;A0A087W   | Q16186           | Proteasomal ubiq     | ADRM1         |
|     | 27.8306 | 27.9773 | 28.1095 | 27.5886 | 28.2849 | 27.9358 | 27.9095 | 28.1938 | 28.1145 | 27.7739 | 28.0857 | 28.5726 | P30566;A0A0A6Y   | P30566;A0A0A6Y   | Adenylosuccinate     | ADSL          |
|     | 26.7464 | 27.3395 | 27.2783 | 26.5774 | 27.3948 | 27.1133 | 27.5825 | 27.8291 | 27.5546 | 27.8282 | 27.8887 | 28.0152 | P30520           | P30520           | Adenylosuccinate     | ADSS          |
|     | 22.7513 | 21.9758 | 22.4708 | 22.074  | NaN     | 22.721  | NaN     | NaN     | NaN     | NaN     | NaN     | NaN     | Q8N556;Q8N556-   | Q8N556;Q8N556-   | Actin filament-ass   | AFAP1         |
|     | 22.7894 | NaN     | 22.8456 | 22.8555 | 22.5874 | NaN     | NaN     | NaN     | NaN     | 22.8426 | NaN     | NaN     | Q8TED9;Q8TED9-   | Q8TED9;Q8TED9-   | Actin filament-ass   | AFAP11L       |
|     | 24.3675 | 25.0198 | 24.5791 | 24.9314 | 25.0562 | 25.0877 | 24.1549 | 24.3389 | 25.2522 | 24.0457 | NaN     | 24.2345 | Q9Y4W6           | Q9Y4W6           | AFG3-like protein    | AFG3L2        |
| NaN | NaN     | NaN     | NaN     | NaN     | NaN     | NaN     | NaN     | 21.8026 | NaN     | NaN     | NaN     | NaN     | P20933           | P20933           | N(4)-(beta-N-acet    | AGA           |
|     | 23.7192 | 23.852  | 23.8648 | 23.6537 | 23.3144 | 23.7678 | 23.6352 | NaN     | 23.6287 | NaN     | NaN     | 22.9842 | Q96P47;Q96P47-   | Q96P47;Q96P47-   | Arf-GAP with GTP     | AGAP3         |
| NaN | NaN     | 23.8597 | 23.314  | NaN     | NaN     | NaN     | 23.6558 | NaN     | NaN     | NaN     | NaN     | NaN     | P52594;C9J2I0;B8 | P52594;C9J2I0;B8 | Arf-GAP domain a     | AGFG1         |
|     | 25.2379 | 25.1912 | 25.4217 | 25.0484 | 25.0891 | 25.3259 | 25.3519 | 25.7797 | 25.7687 | 24.6872 | 25.066  | 25.163  | P35573;P35573-2  | P35573;P35573-2  | Glycogen debranc     | AGL           |
|     | 24.1444 | NaN     | 23.5915 | 23.9923 | 23.3685 | 23.6783 | 23.9289 | NaN     | NaN     | 23.1688 | 23.1287 | NaN     | Q9UKV8;Q9UKV8-   | Q9UKV8;Q9UKV8-   | Protein argonau      | AGO2          |
| NaN | NaN     | NaN     | NaN     | 21.901  | NaN     | Q9NUQ2;H0YC22    | Q9NUQ2;H0YC22    | 1-acyl-sn-glycerol   | AGPAT5        |
|     | 21.7449 | NaN     | 21.8304 | NaN     | NaN     | NaN     | NaN     | NaN     | NaN     | 22.2455 | 22.0008 | NaN     | Q86UL3;E5RIA1;E  | Q86UL3           | Glycerol-3-phosph    | AGPAT6        |
|     | 23.3111 | NaN     | 23.0041 | 23.1768 | 22.8253 | 23.4381 | 23.698  | 23.8576 | 23.9266 | 23.5213 | 23.3008 | 23.7754 | Q53EU6           | Q53EU6           | Glycerol-3-phosph    | AGPAT9        |
|     | 25.4015 | 25.8537 | 26.1521 | 26.1137 | 25.8514 | 26.1027 | 25.8516 | 25.7246 | 26.254  | 25.5946 | 25.5044 | 25.4919 | O00116;B8Z281    | O00116           | Alkylidihydroxyace   | AGPS          |
|     | 23.4238 | 22.4588 | 22.209  | 23.6065 | 22.408  | 22.5126 | NaN     | NaN     | NaN     | NaN     | NaN     | NaN     | O95994;B5MC07;   | O95994;B5MC07;   | Anterior gradient    | AGR2          |
|     | 25.1619 | 25.5334 | 25.5861 | 24.2645 | 24.5695 | 24.1149 | 28.6766 | 27.9755 | 26.5375 | 25.5416 | 25.7716 | 26.3375 | O00468-6;O00468  | O00468-6;O00468  | Aggrin;Aggrin N-terr | AGRN          |
| NaN | NaN     | NaN     | NaN     | 21.058  | NaN     | Q9UPW5;J3KN51;   | Q9UPW5;J3KN51;   | Cytosolic carboxy    | AGTPBP1       |
|     | 23.4391 | 23.1823 | 22.8817 | 23.4759 | 23.0198 | 22.8614 | NaN     | NaN     | NaN     | NaN     | NaN     | 23.2874 | Q6RW13;Q6RW13-   | Q6RW13;Q6RW13-   | Type-1 angiotensi    | AGTRAP        |
|     | 30.6597 | 31.1646 | 31.0585 | 30.6338 | 31.1172 | 31.0715 | 31.1949 | 31.0381 | 30.7996 | 31.116  | 31.238  | 31.2321 | P23526;P23526-2  | P23526;P23526-2  | Adenosylhomocys      | AHCY          |
|     | 28.0327 | 27.4209 | 27.9835 | 27.9347 | 27.6716 | 28.2328 | 28.0931 | 27.9969 | 27.7786 | 28.9008 | 28.5474 | 28.5716 | O43865;O43865-2  | O43865;O43865-2  | Putative adenosyl    | AHCYL1        |
| NaN | NaN     | NaN     | NaN     | NaN     | NaN     | NaN     | NaN     | NaN     | NaN     | 22.8986 | NaN     | NaN     | Q96HN2;Q96HN2-   | Q96HN2;Q96HN2-   | Putative adenosyl    | AHCYL2        |
|     | 32.5386 | 32.7161 | 32.4727 | 32.1214 | 32.4848 | 32.4127 | 32.8235 | 32.3333 | 31.8688 | 32.5404 | 32.3305 | 32.6945 | Q09666;E9PJZ0;E  | Q09666           | Neuroblast differe   | AHNAK         |
|     | 23.3535 | 23.0521 | 23.3196 | 22.3336 | 22.6715 | 22.4028 | NaN     | NaN     | NaN     | NaN     | 21.5893 | NaN     | Q8IVF2;Q8IVF2-3  | Q8IVF2;Q8IVF2-3  | Protein AHNK2        | AHNK2         |
|     | 28.7379 | 28.4975 | 28.5216 | 28.4725 | 28.3836 | 28.4168 | 28.842  | 27.9681 | 28.0822 | 28.5096 | 28.3209 | 28.651  | O95433;O95433-2  | O95433;O95433-2  | Activator of 90 kD   | AHSA1         |
|     | 24.7514 | 25.4914 | 25.9    | 24.5906 | 25.1975 | 25.5766 | 25.0022 | 24.6274 | NaN     | 25.7928 | 25.157  | 25.0493 | Q96BJ3;Q96BJ3-3  | Q96BJ3           | Axin interactor, d   | AIDA          |
|     | 24.563  | 24.9759 | 24.4631 | 24.6494 | 25.065  | 24.8085 | 24.044  | 25.2053 | 24.7678 | 24.3176 | 24.2713 | NaN     | O95831;O95831-3  | O95831;O95831-3  | Apoptosis-inducin    | AIFM1         |
|     | 24.8048 | 23.9456 | 24.23   | 24.7376 | 24.0607 | 23.9179 | 24.327  | NaN     | NaN     | 24.3418 | 23.955  | NaN     | Q9BRQ8;Q9BRQ8-   | Q9BRQ8;Q9BRQ8-   | Apoptosis-inducin    | AIFM2         |
|     | 24.1079 | 23.788  | 23.229  | 23.984  | 24.1203 | 22.727  | NaN     | 24.2035 | 23.636  | 23.7817 | 24.1523 | 24.2111 | Q9Y4K1;A0A0J9Y   | Q9Y4K1;A0A0J9Y   | Absent in melanoi    | AIM1          |
|     | 27.8803 | 28.2652 | 27.7669 | 28.0901 | 28.3745 | 27.7271 | 27.4045 | 27.9547 | 26.826  | 27.4419 | 28.0669 | 28.0499 | Q12904;Q12904-2  | Q12904;Q12904-2  | Aminoacyl tRNA s     | AIMP1         |
|     | 28.4964 | 27.8845 | 27.6912 | 28.1741 | 28.3908 | 27.9814 | 26.962  | 27.9957 | 28.3459 | 27.8266 | 28.3122 | 26.9473 | Q13155;F8W950;   | Q13155;F8W950;   | Aminoacyl tRNA s     | AIMP2         |
|     | 26.4902 | 26.6074 | 26.1713 | 26.0296 | 26.2401 | 26.2999 | 26.29   | 26.3161 | 26.0294 | 26.2118 | 26.176  | 26.4624 | O00170;E9PMH2;   | O00170;E9PMH2;   | AH receptor-inter    | AIP           |
|     | 23.3094 | 24.3292 | 24.1592 | 23.8313 | 24.2023 | 24.2032 | 23.6923 | 23.9813 | 24.1736 | 24.0238 | 24.096  | 25.0508 | Q96IF1;H0YJL9    | Q96IF1           | LIM domain-contz     | AJUBA         |
|     | 25.8926 | 26.5939 | 26.0758 | 25.8361 | 26.1992 | 26.0827 | 26.4111 | 26.3613 | 26.9512 | 26.2655 | 26.0471 | 26.8088 | P00568;Q5T9B7;f  | P00568;Q5T9B7;f  | Adenylate kinase     | AK1           |
|     | 26.2224 | 27.5552 | 26.5123 | 25.9312 | 27.2479 | 26.4852 | 26.396  | 27.6006 | 28.131  | 26.4992 | 26.9901 | 26.6029 | P54819;F8W1A4;f  | P54819;F8W1A4;f  | Adenylate kinase     | AK2           |
|     | 23.6421 | 24.5355 | 24.3504 | 23.8357 | 24.756  | 24.1859 | 24.032  | NaN     | 25.4729 | 23.9543 | 24.8078 | 25.3677 | Q9UIJ7;Q9UIJ7-3; | Q9UIJ7;Q9UIJ7-3; | GTP:AMP phosphr      | AK3           |
|     | 27.0407 | 26.8014 | 26.4768 | 26.8145 | 26.7401 | 26.258  | 25.1418 | 25.9842 | 26.7339 | 26.0001 | 26.433  | 26.1509 | P27144;D3DQ64    | P27144;D3DQ64    | Adenylate kinase     | AK4           |
|     | 25.8988 | 25.0178 | 25.1559 | 25.7905 | 25.2937 | 25.3968 | 24.7732 | NaN     | 23.9269 | 25.7563 | 25.4625 | 25.978  | Q9Y3D8;A0A087V   | Q9Y3D8;A0A087V   | Adenylate kinase     | AK6;TAF9      |
|     | 20.0951 | NaN     | Q92667;I3LOW0;f  | Q92667;I3LOW0;f  | A-kinase anchor p    | AKAP1         |
|     | 22.5232 | NaN     | 21.9219 | NaN     | NaN     | O43572;E7EMD6;   | O43572;E7EMD6;   | A-kinase anchor p    | AKAP10        |
|     | 24.1964 | 22.6693 | 23.605  | NaN     | 22.4556 | NaN     | 24.5617 | 23.3893 | 22.8745 | 22.4707 | NaN     | NaN     | Q9UKA4           | Q9UKA4           | A-kinase anchor p    | AKAP11        |
|     | 23.4721 | 23.5777 | 24.5536 | 23.1402 | NaN     | 23.1054 | 24.5083 | NaN     | NaN     | 23.4087 | NaN     | NaN     | Q02952;Q02952-2  | Q02952;Q02952-2  | A-kinase anchor p    | AKAP12        |
|     | 21.7287 | NaN     | NaN     | 21.9294 | NaN     | Q02040;X6RAJ1;C  | Q02040;X6RAJ1;C  | A-kinase anchor p    | AKAP17A       |
|     | 27.6903 | 28.1493 | 27.2807 | 26.9736 | 27.5455 | 27.0703 | 27.4081 | 27.7154 | 27.3395 | 26.5035 | 26.0954 | 26.6203 | Q9Y2D5-6;Q9Y2D   | Q9Y2D5-6;Q9Y2D   | A-kinase anchor p    | AKAP2         |
| NaN | NaN     | NaN     | NaN     | NaN     | NaN     | NaN     | NaN     | NaN     | NaN     | NaN     | NaN     | 20.4673 | Q9ULX6;Q9ULX6-   | Q9ULX6;Q9ULX6-   | A-kinase anchor p    | AKAP8L        |
|     | 20.1278 | NaN     | Q99996;A0A087W   | Q99996;A0A087W   | A-kinase anchor p    | AKAP9         |
|     | 26.438  | 27.1963 | 26.8116 | 26.1667 | 26.9355 | 26.8984 | 26.1692 | 26.561  | 26.9072 | 26.0945 | 26.2666 | 26.445  | P14550;V9GYG2;\  | P14550           | Alcohol dehydrog     | AKR1A1        |
|     | 26.724  | 28.0983 | 27.0673 | 26.1269 | 27.7847 | 27.2085 | 29.1404 | 28.7411 | 29.5807 | 28.3516 | 28.7742 | 29.7722 | P15121;E9PCX2;E  | P15121;E9PCX2;   | Aldose reductase     | AKR1B1        |
|     | 24.7318 | 25.6972 | 25.6252 | 24.5439 | 25.2434 | 25.3331 | 25.8697 | 25.989  | 26.2028 | 25.4882 | 25.6049 | 26.1691 | P42330;A0A0A0N   | P42330;A0A0A0N   | Aldo-keto reducta    | AKR1C3;AKR1C1 |
|     | 27.9243 | 28.1923 | 27.779  | 27.5201 | 28.0027 | 27.7    | 27.7591 | 27.573  | 28.0044 | 28.3553 | 28.5477 | 28.2603 | O43488;H3BLU7;f  | O43488;H3BLU7    | Aflatoxin B1 aldeh   | AKR7A2        |
|     | 25.5833 | 24.9664 | 24.9013 | 25.3773 | 24.563  | 24.9336 | 24.8897 | NaN     | 24.414  | 25.431  | 25.0895 | 24.9573 | P31749;P31749-2; | P31749;P31749-2  | RAC-alpha serine/    | AKT1          |
| NaN | NaN     | 21.8668 | 22.2935 | NaN     | 21.553  | NaN     | Q96B36;Q96B36-   | Q96B36;Q96B36-   | Proline-rich AKT1    | AKT1S1        |
| NaN | NaN     | NaN     | 23.3684 | NaN     | NaN     | NaN     | 23.8329 | NaN     | NaN     | NaN     | NaN     | NaN     | P13716;P13716-2  | P13716;P13716-2  | Delta-aminolevuli    | ALAD          |
|     | 29.7651 | 29.2752 | 29.5751 | 29.9004 | 29.0341 | 29.6871 | 30.2158 | 30.0383 | 29.7723 | 30.431  | 29.8043 | 29.7463 | Q13740;Q13740-   | Q13740;Q13740-   | CD166 antigen        | ALCAM         |
|     | 26.3047 | 26.7091 | 26.2421 | 26.202  | 26.9536 | 26.4538 | 26.3762 | 26.8418 | 27.0303 | 26.3542 | 26.8767 | 27.0718 | Q8I283;Q8I283-3; | Q8I283;Q8I283-3; | Aldehyde dehydry     | ALDH16A1      |
|     | 28.3172 | 27.6628 | 27.4981 | 28.6999 | 28.1026 | 27.907  | 26.3002 | 27.244  | 27.9232 | 26.4643 | 27.1224 | 26.742  | P54886;P54886-2  | P54886;P54886-2  | Delta-1-pyrroline-   | ALDH18A1      |
|     | 24.8456 | 24.6719 | 24.6215 | 25.3363 | 25.0544 | 24.1707 | NaN     | 23.7563 | 24.8909 | 23.9135 | 23.6433 | 24.2792 | P30837           | P30837           | Aldehyde dehydro     | ALDH1B1       |
|     | 27.1316 | 27.6314 | 27.0363 | 26.9986 | 27.8505 | 27.2323 | 24.3915 | 25.9497 | 26.6886 | 25.1531 | 26.3643 | 26.4078 | P05091;P05091-2  | P05091;P05091-2  | Aldehyde dehydry     | ALDH2         |
|     | 23.8096 | 23.372  | 24.0634 | 23.8106 | 23.8498 | 24.2429 | NaN     | NaN     | NaN     | 24.6016 | 24.0464 | NaN     | P51648;P51648-2  | P51648;P51648-2  | Fatty aldehyde de    | ALDH3A2       |
|     | 22.8496 | NaN     | 22.2702 | NaN     | 22.7205 | NaN     | NaN     | NaN     | NaN     | 23.248  | NaN     | NaN     | P30038;P30038-2  | P30038;P30038-2  | Delta-1-pyrroline-   | ALDH4A1       |



|         |         |         |         |         |         |         |         |         |         |         |         |                                                               |
|---------|---------|---------|---------|---------|---------|---------|---------|---------|---------|---------|---------|---------------------------------------------------------------|
| 26.0209 | 24.9946 | 25.1454 | 25.5988 | 25.0651 | 25.4187 | 24.3392 | 23.8731 | NaN     | 24.0917 | NaN     | NaN     | Q02252;Q02252-; Q02252;Q02252-; Methylmalonate- ALDH6A1       |
| 29.0089 | 29.0455 | 28.8634 | 28.7729 | 29.0135 | 28.9501 | 29.1311 | 29.4798 | 29.7246 | 29.6189 | 29.9775 | 29.6469 | P49419-2;P49419 P49419-2;P49419; Alpha-aminoadipil ALDH7A1    |
| 28.7063 | 28.5098 | 28.3505 | 28.4237 | 28.4191 | 28.3904 | 28.5024 | 28.1633 | 28.2925 | 28.8159 | 29.1413 | 28.5319 | P49189;P49189-2 P49189;P49189-2 4-trimethylaminol ALDH9A1     |
| 33.3657 | 34.1419 | 33.6562 | 32.9593 | 33.7151 | 33.5129 | 34.2118 | 34.226  | 33.5712 | 33.8224 | 33.8605 | 33.8915 | P04075;J3KPS3;H: P04075;J3KPS3;H: Fructose-bisphosf ALDOA     |
| NaN     | 20.3774 | NaN     | P05062;A0A087W P05062;A0A087W Fructose-bisphosf ALDOB         |
| 29.3685 | 30.1076 | 29.4444 | 28.678  | 29.4066 | 29.2312 | 29.6621 | 29.7772 | 29.2945 | 29.0377 | 29.1142 | 29.2904 | P09972;A8MVZ9;J P09972;A8MVZ9;J Fructose-bisphosf ALDOC       |
| 24.0444 | 22.8147 | 23.4292 | 23.6242 | 23.4392 | 23.5796 | 23.7837 | 24.5091 | 24.0057 | 24.3282 | 23.4037 | 23.6883 | Q9BT22;K7EID2;Q Q9BT22;K7EID2;Q Chitobiosyldiphos ALG1        |
| 23.1063 | NaN     | 22.9112 | 23.1484 | 22.7284 | 23.0874 | NaN     | 23.4502 | NaN     | 23.2474 | 22.7766 | 22.9867 | Q9H553;Q9H553- Q9H553;Q9H553- Alpha-1,3/1,6-mai ALG2          |
| NaN     | NaN     | NaN     | 20.2219 | NaN     | Q92685;F8WF93;I Q92685;F8WF93;I Dol-P-Man:Man(5 ALG3          |
| 24.7739 | 24.5138 | 24.3556 | 25.0041 | 24.2462 | 24.4034 | 24.9514 | NaN     | 24.4859 | 25.025  | 24.4551 | 24.2188 | Q9Y673;Q9Y673-; Q9Y673;Q9Y673-2 Dolichyl-phosphat ALG5        |
| NaN     | NaN     | 22.089  | 22.5761 | NaN     | Q9H6U8;A0A087V Q9H6U8;A0A087V Alpha-1,2-manno: ALG9           |
| 22.9022 | 22.6086 | 22.7936 | 23.0641 | 22.8136 | 22.7344 | NaN     | NaN     | NaN     | 22.6835 | 22.6559 | 22.8604 | Q6P6C2;Q6P6C2-; Q6P6C2;Q6P6C2-; RNA demethylase ALKBH5        |
| NaN     | NaN     | 22.0009 | NaN     | P05186;P05186-2 P05186;P05186-2; Alkaline phosphat ALPL       |
| NaN     | NaN     | NaN     | NaN     | NaN     | NaN     | 21.9616 | NaN     | NaN     | NaN     | NaN     | NaN     | P05187;P10696;A P05187;P10696;A Alkaline phosphat ALPP;ALPPL2 |
| 26.427  | 26.5593 | 26.1983 | 26.051  | 26.4293 | 26.2622 | 25.8708 | 27.0495 | 25.646  | 25.8872 | 26.4693 | 26.5544 | Q86V81;E9PB61 Q86V81;E9PB61 THO complex sub ALYREF            |
| 21.0656 | NaN     | Q8IY45;Q8IY45-2; Q8IY45;Q8IY45-2; Protein AMN1 hor AMN1       |
| NaN     | 21.0417 | Q8IY63;Q8IY63-2 Q8IY63;Q8IY63-2 Angiototin-like p AMOTL1      |
| 23.657  | 23.6436 | 23.7713 | 23.5074 | 23.4197 | 23.9506 | NaN     | NaN     | NaN     | 23.8895 | 23.6367 | NaN     | Q9Y2J4;Q9Y2J4-2; Q9Y2J4;Q9Y2J4-2; Angiototin-like p AMOTL2    |
| 25.5456 | 25.6763 | 25.6114 | 25.5661 | 25.9347 | 25.5236 | 26.2976 | 26.0347 | 26.0428 | 25.9123 | 25.7788 | 25.7588 | Q01433;Q01433-; Q01433;Q01433-; AMP deaminase 2 AMPD2         |
| 26.1143 | 24.7126 | 24.7031 | 25.6163 | 24.5003 | 24.4259 | NaN     | 23.4711 | NaN     | 24.5142 | 24.0323 | 23.4835 | Q9H1A4;H0Y564;I Q9H1A4;H0Y564 Anaphase-promot ANAPC1          |
| 24.6449 | 24.703  | 24.2068 | 24.7922 | 24.4416 | NaN     | NaN     | NaN     | NaN     | 23.9865 | 24.0098 | 24.235  | Q9UM13;D6R9Q5 Q9UM13;D6R9Q5 Anaphase-promot ANAPC10           |
| 21.8906 | NaN     | Q96DE5;A0A087V Q96DE5;A0A087V Anaphase-promot ANAPC16         |
| 23.3525 | NaN     | NaN     | 22.2672 | NaN     | NaN     | NaN     | NaN     | NaN     | 21.9674 | NaN     | NaN     | Q9UJX5;Q9UJX5-; Q9UJX5;Q9UJX5-3 Anaphase-promot ANAPC4        |
| 23.8768 | 22.6563 | 22.6773 | 24.0567 | 22.794  | 23.096  | NaN     | NaN     | NaN     | 22.7304 | 22.8316 | NaN     | Q9UJX4;F5H0F9;C Q9UJX4;F5H0F9;C Anaphase-promot ANAPC5        |
| 27.5412 | 26.0557 | 26.7864 | 27.7376 | 26.6016 | 26.7794 | 25.1146 | 24.7669 | 25.0657 | 26.0869 | 26.0857 | 24.5489 | Q9UJX3;Q9UJX3-; Q9UJX3;Q9UJX3-2 Anaphase-promot ANAPC7        |
| NaN     | NaN     | 22.8827 | NaN     | NaN     | NaN     | NaN     | NaN     | NaN     | 23.5062 | NaN     | NaN     | Q9UKU9;Q95841; Q9UKU9 Angiotoin-relat ANGPTL2                 |
| NaN     | 21.7134 | Q12955;Q12955-4 Q12955;Q12955-4 Ankyrin-3 ANK3                |
| 26.073  | 25.2711 | 25.3497 | 25.8791 | 25.2691 | 24.9631 | 24.0552 | NaN     | 24.0748 | 24.7741 | 24.3889 | 23.3846 | Q9P2R3;Q9P2R3-; Q9P2R3;Q9P2R3-; Rabankyrin-5 ANKFY1           |
| 24.1096 | 22.9051 | 22.832  | 23.1472 | 22.6808 | 22.8099 | NaN     | NaN     | NaN     | NaN     | NaN     | NaN     | Q8IW23;Q8IW23- Q8IW23;Q8IW23- Ankyrin repeat an ANKH01        |
| 23.6586 | 23.5429 | 23.3225 | 23.2595 | 23.3877 | 23.2795 | 23.4601 | NaN     | NaN     | 23.146  | NaN     | NaN     | Q8IZ07;H0YIN8;S4 Q8IZ07;H0YIN8 Ankyrin repeat do ANKRD13A     |
| 26.0964 | 22.5578 | 23.1402 | 23.7618 | 21.9227 | 21.8326 | NaN     | NaN     | NaN     | 21.3032 | NaN     | NaN     | O75179;H0YM23; O75179;H0YM23; Ankyrin repeat do ANKRD17       |
| 25.8084 | 24.5612 | 25.0665 | 25.5265 | 24.926  | 25.0736 | 25.2357 | 25.2195 | NaN     | 25.6186 | 25.1283 | 24.7221 | O15084;O15084-1 O15084;O15084-1 Serine/threonine- ANKRD28     |
| 22.8745 | NaN     | 22.3152 | 22.9883 | 22.4228 | NaN     | NaN     | NaN     | 23.2915 | NaN     | 22.5247 | 22.8419 | Q9ULI7;Q9ULI7-2 Q9ULI7;Q9ULI7-2 Ankyrin repeat do ANKRD50     |
| NaN     | 26.6355 | NaN     | NaN     | Q92625;Q92625-; Q92625;Q92625-2 Ankyrin repeat an ANKS1A      |
| 26.4266 | 24.7804 | 25.8375 | 26.0674 | 24.947  | 25.1366 | NaN     | NaN     | NaN     | 23.7012 | 23.6395 | NaN     | Q9H8Y5;B8Z54;C Q9H8Y5;B8Z54 Ankyrin repeat an ANKF21          |
| 28.4732 | 28.653  | 29.7255 | 29.2021 | 29.2318 | 30.0621 | 29.68   | 29.0121 | 29.2881 | 29.1373 | 28.8854 | 29.1625 | Q9NQW6;Q9NQW Q9NQW6;Q9NQW Actin-binding prot ANLN             |
| 24.9001 | 23.7492 | 24.3899 | 24.6026 | 23.8006 | 24.2341 | 25.896  | 25.6283 | 25.1888 | 25.7844 | NaN     | NaN     | Q9NW15;Q9NW1 Q9NW15;Q9NW1 Anoctamin-10;An ANO10               |
| 26.4429 | 26.1798 | 27.1863 | 26.7975 | 26.4373 | 27.6034 | 26.9927 | 25.9723 | 26.8762 | 27.9775 | 27.272  | 27.382  | Q4KMQ2;Q4KMQ Q4KMQ2;Q4KMQ Anoctamin-6 ANO6                    |
| 24.7412 | 25.3325 | 25.6231 | 25.348  | 25.7924 | 26.1893 | 26.0143 | 26.1703 | 26.3274 | 26.1318 | 26.5284 | 26.8061 | P39687;H0YN26;P P39687;H0YN26 Acidic leucine-rich ANP32A      |
| 25.0614 | 24.9219 | 25.3406 | 25.2905 | 24.2751 | 25.3835 | 25.1795 | NaN     | NaN     | 26.0804 | 25.5957 | 25.4305 | Q92688;Q92688-; Q92688;Q92688-2 Acidic leucine-rich ANP32B    |
| 26.9552 | 25.2001 | 25.8928 | 26.6218 | 25.2849 | 26.3714 | NaN     | 25.3072 | 25.0842 | 26.0006 | 25.7637 | 25.2194 | Q9BTT0;Q9BTT0-; Q9BTT0;Q9BTT0-3 Acidic leucine-rich ANP32E    |
| 24.4182 | 24.9036 | 25.1292 | 24.8198 | 24.9034 | 25.0649 | 24.5117 | NaN     | 25.0833 | 24.8496 | 24.5824 | 24.9774 | Q9H6X2;Q9H6X2- Q9H6X2;Q9H6X2- Anthrax toxin rect ANTXR1       |
| 28.5123 | 28.3191 | 28.6028 | 28.4546 | 28.1339 | 28.6181 | 28.1885 | 28.1823 | 29.2077 | 28.418  | 27.861  | 28.79   | P58335-4;P58335 P58335-4;P58335-4; Anthrax toxin rect ANTXR2  |
| 32.0876 | 31.6547 | 30.8469 | 32.9837 | 31.7539 | 30.6505 | 31.954  | 31.7803 | 31.9629 | 32.2478 | 32.1955 | 32.1729 | P04083;Q5T3N1;C P04083;Q5T3N1 Annexin A1;Anne ANXA1           |
| 29.1548 | 29.4655 | 29.5348 | 29.3502 | 29.4544 | 29.5937 | 29.5229 | 29.0906 | 29.6792 | 29.6062 | 29.1748 | 29.6644 | P50995;P50995-2 P50995;P50995-2 Annexin A11 ANXA11            |
| 35.1668 | 34.3964 | 34.4812 | 36.0731 | 34.591  | 34.3665 | 34.0831 | 33.8226 | 34.0764 | 34.7405 | 34.2826 | 33.8869 | P07355;P07355-2 P07355;P07355-2; Annexin A2;Anne ANXA2        |
| 29.7927 | 29.7127 | 29.1971 | 29.3371 | 29.3275 | 29.1226 | 30.5762 | 30.2896 | 30.5596 | 31.5298 | 30.5177 | 30.5265 | P12429;D6RA82;C P12429;D6RA82;C Annexin A3;Anne ANXA3         |
| 22.063  | NaN     | P09525;P09525-2 P09525;P09525-2 Annexin A4 ANXA4              |
| 27.957  | 28.2059 | 27.0175 | 28.777  | 28.1386 | 26.7792 | 27.677  | 26.0624 | 27.3838 | 27.0761 | 26.3732 | 26.858  | Q6P452;B4E1S2 Q6P452                                          |
| 30.4308 | 31.2204 | 29.5023 | 31.66   | 30.9584 | 29.4058 | 31.2901 | 30.4826 | 29.9176 | 30.803  | 30.4443 | 29.8345 | P08758;D6RBL5;E P08758;D6RBL5;E Annexin A5;Anne ANXA5         |
| 26.1674 | NaN     | 25.5458 | 25.5929 | 25.346  | 25.3074 | 26.1288 | NaN     | NaN     | 26.3013 | 25.4959 | NaN     | E5RK69;H0YC77 E5RK69 Annexin ANXA6                            |
| 34.945  | 34.8992 | 34.8515 | 35.1755 | 34.8753 | 34.8953 | 34.8483 | 34.1788 | 34.3792 | 35.0396 | 34.3449 | 34.5351 | P08133;P08133-2 P08133;P08133-2; Annexin A6;Anne ANXA6        |
| 28.303  | 28.5266 | 27.9436 | 28.2637 | 28.3857 | 27.7516 | 28.7494 | 27.8027 | 28.0645 | 28.5192 | 28.0186 | 28.1666 | P20073;P20073-2 P20073;P20073-2 Annexin A7 ANXA7              |
| 26.1508 | 26.5193 | 26.2848 | 25.6217 | 26.3561 | 26.1415 | 26.8625 | 26.5067 | 25.6118 | 26.129  | 25.9641 | 25.9174 | Q10567-3;Q1056; Q10567-3;Q1056; AP-1 complex sub AP1B1        |
| 27.3015 | 26.2058 | 27.1217 | 27.1992 | 26.2668 | 27.0823 | 27.3122 | 25.3351 | 26.4509 | 27.5347 | 27.1467 | 26.4936 | O43747;O43747-; Q43747;O43747-2 AP-1 complex sub AP1G1        |
| 25.4799 | 24.9721 | 25.1173 | 24.8826 | 24.3883 | 24.8819 | 24.7345 | NaN     | NaN     | 24.204  | 24.5328 | 23.7709 | O75843;G3V532;C O75843                                        |
| 26.8883 | 26.7138 | 26.9917 | 26.4735 | 26.8275 | 27.0349 | 26.9337 | 26.8503 | 26.2005 | 26.5019 | 26.765  | 26.5826 | Q9BX55;Q9BX55-; Q9BX55;Q9BX55- AP-1 complex sub AP1M1         |
| NaN     | NaN     | NaN     | 21.5194 | NaN     | P61966;H7C1E4;P P61966;H7C1E4;P AP-1 complex sub AP1S1        |
| 24.1881 | 24.0201 | 24.4483 | 24.2962 | 23.7581 | 24.3378 | 24.0178 | 23.8364 | 24.2167 | 23.9799 | 23.998  | NaN     | P56377;F65FB5;A P56377;F65FB5;A AP-1 complex sub AP1S2        |
| 28.0569 | 28.1625 | 28.218  | 27.8124 | 28.1634 | 28.2847 | 28.0871 | 27.6391 | 27.557  | 27.93   | 27.9335 | 27.7407 | O95782;O95782-; O95782;O95782-2 AP-2 complex sub AP2A1        |



|     |         |         |         |         |         |         |         |         |         |         |         |         |                  |                  |                                  |                         |
|-----|---------|---------|---------|---------|---------|---------|---------|---------|---------|---------|---------|---------|------------------|------------------|----------------------------------|-------------------------|
|     | 26.3199 | 25.8939 | 25.9671 | 25.9108 | 25.8129 | 25.9356 | 25.8874 | 24.8733 | 24.6302 | 25.5449 | 25.2399 | 25.4257 | O94973;O94973-2  | O94973;O94973-2  | AP-2 complex sub AP2A2           |                         |
|     | 29.4256 | 29.3176 | 29.647  | 29.2525 | 28.985  | 29.5705 | 29.6098 | 28.7393 | 28.9312 | 29.4588 | 29.2262 | 29.0692 | P63010;P63010-2  | P63010;P63010-2  | AP-2 complex sub AP2B1           |                         |
|     | 28.2137 | 27.9809 | 28.3438 | 27.8934 | 28.3067 | 28.39   | 28.0986 | 27.5851 | 28.1402 | 27.4733 | 27.6604 | 28.2136 | Q96CW1;Q96CW     | Q96CW1;Q96CW     | AP-2 complex sub AP2M1           |                         |
|     | 25.1129 | 25.2806 | 25.4579 | 25.1568 | 25.5914 | 25.5278 | 25.0283 | 24.9237 | 25.3441 | 24.549  | 24.9653 | 25.3657 | P53680;MOR0N4;I  | P53680;MOR0N4;I  | AP-2 complex sub AP2S1           |                         |
|     | 27.612  | 26.5039 | 27.111  | 27.3407 | 26.8825 | 27.3168 | 26.8772 | 26.6634 | 27.0741 | 27.0644 | 27.0928 | 26.6922 | O00203;O00203-3  | O00203;O00203-3  | AP-3 complex sub AP3B1           |                         |
|     | 26.5265 | 25.9257 | 26.4211 | 26.3931 | 26.1525 | 26.3436 | 25.6546 | 26.2343 | 26.2323 | 26.117  | 26.1665 | 26.0849 | O14617;O14617-5  | O14617;O14617-5  | AP-3 complex sub AP3D1           |                         |
|     | 26.7773 | 25.5717 | 26.1846 | 26.7534 | 25.9837 | 25.9502 | 25.14   | 24.6167 | 25.8698 | 25.1039 | 25.0237 | 24.169  | Q9Y2T2           | Q9Y2T2           | AP-3 complex sub AP3M1           |                         |
|     | 23.5386 | 22.7784 | 23.4022 | 23.3754 | 22.9983 | 22.9887 | NaN     | NaN     | NaN     | NaN     | NaN     | NaN     | P53677;E5RJ52;H  | P53677;E5RJ52    | AP-3 complex sub AP3M2           |                         |
|     | 25.351  | 24.7562 | 25.5119 | 25.6813 | 25.2939 | 25.3705 | 24.467  | 24.4567 | 25.0134 | 25.359  | 25.2792 | 24.4149 | Q92572;F5H459    | Q92572;F5H459    | AP-3 complex sub AP3S1           |                         |
|     | 21.4844 | NaN     | NaN     | 21.0597 | NaN     | Q9Y6B7;B1ALD0;E  | Q9Y6B7;B1ALD0;E  | AP-4 complex sub AP4B1           |                         |
| NaN | NaN     | NaN     | NaN     | NaN     | NaN     | NaN     | NaN     | NaN     | NaN     | NaN     | NaN     | NaN     | Q9UPM8;Q9UPM     | Q9UPM8;Q9UPM     | AP-4 complex sub AP4E1           |                         |
|     | 22.3427 | NaN     | O00189;C9JWL4;C  | O00189;C9JWL4;C  | AP-4 complex sub AP4M1           |                         |
|     | 20.999  | NaN     | O43299;O43299-2  | O43299;O43299-2  | AP-5 complex sub AP5Z1           |                         |
|     | 23.8333 | 21.9481 | 23.4157 | 24.0737 | NaN     | NaN     | NaN     | NaN     | NaN     | NaN     | 23.1573 | NaN     | O14727;O14727-4  | O14727;O14727-4  | Apoptotic proteas APAF1          |                         |
| NaN | NaN     | NaN     | NaN     | NaN     | NaN     | NaN     | NaN     | NaN     | NaN     | NaN     | NaN     | 19.9852 | NaN              | O96018           | O96018                           | Amyloid beta A4 f APBA3 |
|     | 22.7547 | NaN     | 22.0986 | 21.8993 | NaN     | 21.1932 | Q7Z5R6           | Q7Z5R6           | Amyloid beta A4 f APBB1IP        |                         |
|     | 26.8822 | 27.8095 | 27.2376 | 26.7798 | 27.7054 | 27.2681 | 27.9796 | 28.7758 | 28.3176 | 27.6214 | 28.0666 | 28.3697 | P13798;C9JIF9;H7 | P13798;C9JIF9;H7 | Acylamino-acid-re APEH           |                         |
|     | 26.4944 | 26.1894 | 26.3221 | 26.4223 | 26.6759 | 26.1835 | 25.368  | 25.4166 | NaN     | 26.4403 | 26.6266 | 26.2241 | P27695;G3V3M6;I  | P27695;G3V3M6;I  | DNA-(apurinic or c) APEX1        |                         |
| NaN | NaN     | NaN     | NaN     | NaN     | NaN     | NaN     | NaN     | NaN     | NaN     | 21.9166 | NaN     | NaN     | Q96B13;Q96B13-2; | Q96B13;Q96B13-2  | Gamma-secretase APH1A            |                         |
|     | 24.7992 | 24.3107 | 24.5483 | 24.8428 | 24.0769 | 24.5645 | 24.6423 | 24.3292 | NaN     | 24.6086 | 24.8342 | 24.661  | Q9BZZ5-2;Q9BZZ5  | Q9BZZ5-2;Q9BZZ5  | Apoptosis inhibito AP15          |                         |
|     | 23.5032 | 24.3317 | 23.9522 | 23.3724 | 24.082  | 23.8737 | NaN     | NaN     | NaN     | 23.4736 | NaN     | 23.996  | Q96GX9;S4R3D6;I  | Q96GX9;S4R3D6;I  | Methylthioribulos APIP           |                         |
|     | 28.479  | 28.7839 | 28.7286 | 28.0322 | 28.0361 | 28.3588 | 30.5611 | 29.5919 | 29.2894 | 27.8911 | 27.5525 | 28.2019 | Q06481;Q06481-2  | Q06481;Q06481-2  | Amyloid-like prote APLP2         |                         |
|     | 27.4646 | 27.4319 | 27.1989 | 27.5305 | 27.3883 | 27.2331 | 27.8374 | 27.6223 | 28.1818 | 27.6077 | 27.4036 | 27.4419 | Q9HDC9;HOY512;I  | Q9HDC9;HOY512;I  | Adipocyte plasmas APMAP          |                         |
|     | 23.8383 | 24.7644 | 24.3159 | 23.5046 | 24.3529 | 24.0939 | 24.1893 | NaN     | NaN     | 23.7525 | 24.0044 | NaN     | Q8NCW5;Q8NCW     | Q8NCW5;Q8NCW     | NAD(P)H-hydrate APOA1BP          |                         |
|     | 25.2004 | 25.6905 | 24.0427 | 25.925  | 24.7451 | 23.9519 | NaN     | NaN     | 25.6802 | 24.0121 | 25.0937 | 24.7677 | P04114;A0A087W   | P04114;A0A087W   | Apolipoprotein B- APOB           |                         |
|     | 26.3041 | 25.1843 | 25.6685 | 26.7589 | 25.6124 | 25.8443 | NaN     | NaN     | 24.3027 | 25.1442 | 25.6744 | 24.6132 | Q9UH17;B0QYD3;   | Q9UH17;B0QYD3;   | DNA dc->du-editi APOBEC3B        |                         |
|     | 23.4685 | 23.8006 | NaN     | 24.0087 | 24.0812 | 24.3277 | NaN     | NaN     | 23.5413 | 23.7112 | 23.8238 | 24.1641 | Q9NRW3           | Q9NRW3           | DNA dc->du-editi APOBEC3C        |                         |
|     | 23.8925 | 24.5636 | 24.1848 | 24.593  | 24.3277 | 24.967  | NaN     | NaN     | NaN     | 24.0195 | NaN     | 24.1462 | Q96AK3;Q6ICH2;I  | Q96AK3;Q6ICH2    | DNA dc->du-editi APOBEC3D;bk150  |                         |
| NaN | NaN     | NaN     | NaN     | NaN     | NaN     | NaN     | 26.198  | NaN     | NaN     | NaN     | NaN     | NaN     | K7ER19;P02654;K7 | K7ER19;P02654;K7 | Apolipoprotein C- APOC1          |                         |
| NaN | NaN     | 23.4825 | NaN     | NaN     | 24.0532 | NaN     | 24.6769 | NaN     | NaN     | NaN     | NaN     | NaN     | P02656;B0YIW2    | P02656;B0YIW2    | Apolipoprotein C- APOC3          |                         |
| NaN | NaN     | NaN     | 22.9086 | NaN     | 22.7519 | NaN     | Q9BQE5;J3KQL8    | Q9BQE5;J3KQL8    | Apolipoprotein L2 APOL2          |                         |
|     | 26.5046 | 26.6842 | 26.8251 | 26.0674 | 26.3611 | 26.1057 | 30.4226 | 29.3626 | 28.0651 | 27.2982 | 26.8317 | 27.3228 | P05067;P05067-8; | P05067;P05067-8; | Amyloid beta A4 f APP            |                         |
|     | 26.5961 | 26.3415 | 26.4329 | 25.9076 | 26.0788 | 26.0952 | 26.6237 | 26.6922 | 26.2089 | 26.1218 | 26.0295 | 26.2097 | Q9UKG1;C9JAB0;I  | Q9UKG1           | DCC-interacting p APPL1          |                         |
|     | 26.0025 | 25.7785 | 25.6828 | 25.4053 | 25.17   | 25.3554 | 25.3023 | 24.6546 | 24.9663 | 24.7027 | 24.8021 | 25.2588 | Q8NEU8;Q8NEU8    | Q8NEU8;Q8NEU8    | DCC-interacting p APPL2          |                         |
|     | 29.3138 | 28.8592 | 28.5441 | 28.9824 | 28.7838 | 28.4314 | 28.7192 | 28.509  | 29.0781 | 29.7082 | 30.1682 | 29.1575 | P07741;P07741-2  | P07741;P07741-2  | Adenine phospho APRT             |                         |
|     | 25.6174 | 24.9342 | 24.9871 | 26.0929 | 24.772  | 25.1158 | NaN     | NaN     | NaN     | 25.5717 | 25.2969 | 24.1748 | O60306;HOYH15;I  | O60306           | Intron-binding prc AQR           |                         |
|     | 24.6809 | 24.1897 | 24.4066 | 24.5105 | 23.77   | 24.651  | NaN     | NaN     | NaN     | 24.957  | 24.137  | 24.5276 | P10398;Q96II5;P1 | P10398;Q96II5    | Serine/threonine- ARAF           |                         |
|     | 26.7087 | 26.2405 | 26.4964 | 26.8215 | 26.2253 | 26.6074 | 26.5031 | 26.8711 | 26.9238 | 26.6418 | 26.9222 | 26.9059 | Q96P48-3;Q96P4   | Q96P48-3;Q96P4   | Arf-GAP with Rho ARAP1           |                         |
|     | 26.5161 | NaN     | 25.7488 | 26.5684 | 25.6572 | 25.9543 | NaN     | 26.5826 | NaN     | 26.1961 | 25.9542 | NaN     | Q8WWN8;G5E9Y;I   | Q8WWN8;G5E9Y;I   | Arf-GAP with Rho ARAP3           |                         |
|     | 29.8074 | 29.8434 | 29.7496 | 29.4501 | 29.7198 | 29.6733 | 29.3675 | 29.2935 | 28.9754 | 28.925  | 29.2061 | 29.1746 | P48444;B0YIW6;P  | P48444;B0YIW6;P  | Coatomer subunit ARCN1           |                         |
| NaN | NaN     | NaN     | NaN     | NaN     | NaN     | NaN     | 22.5457 | NaN     | NaN     | NaN     | NaN     | NaN     | P15514;D6RFX5    | P15514;D6RFX5    | Amphiregulin AREG                |                         |
|     | 30.104  | 28.9979 | 29.4087 | 29.4759 | 28.5037 | 29.3712 | 30.1565 | 27.9876 | 28.6108 | 29.6588 | 29.1511 | 28.388  | P61204;P84077;F  | P61204;P84077;F  | ADP-ribosylation f ARF3;ARF1     |                         |
|     | 29.7562 | 27.6577 | 28.1002 | 28.5851 | 27.213  | 27.7732 | 28.6345 | NaN     | NaN     | 28.455  | 27.9565 | NaN     | P18085;C9JPM4;C  | P18085;C9JPM4;C  | ADP-ribosylation f ARF4          |                         |
|     | 26.7461 | NaN     | 26.0646 | 25.6674 | 25.1637 | 26.116  | NaN     | NaN     | NaN     | 26.4634 | 26.4399 | 23.6934 | P84085;C9J1Z8    | P84085;C9J1Z8    | ADP-ribosylation f ARF5          |                         |
|     | 30.228  | 28.7362 | 29.8706 | 29.816  | 28.7448 | 30.0606 | 30.4189 | 28.316  | 28.5559 | 30.2349 | 29.4572 | 28.8882 | P62330           | P62330           | ADP-ribosylation f ARF6          |                         |
|     | 26.1375 | 25.8577 | 25.8586 | 26.0142 | 25.8677 | 25.838  | 25.7404 | NaN     | 25.5997 | 25.5098 | 25.5278 | 25.4504 | Q8N6T3;Q8N6T3-   | Q8N6T3;Q8N6T3-   | ADP-ribosylation f ARFGAP1       |                         |
|     | 23.2679 | 24.0227 | 23.7067 | 23.5007 | 23.8153 | NaN     | NaN     | NaN     | 23.8154 | 23.5485 | 23.0918 | 23.3983 | Q8N6H7;A0A0D9;I  | Q8N6H7;A0A0D9;I  | ADP-ribosylation f ARFGAP2       |                         |
|     | 23.6318 | NaN     | 23.2838 | 23.0951 | NaN     | 23.3617 | NaN     | NaN     | NaN     | NaN     | NaN     | NaN     | Q9NP61;Q9NP61-   | Q9NP61;Q9NP61-   | ADP-ribosylation f ARFGAP3       |                         |
|     | 22.7485 | NaN     | NaN     | 22.5825 | NaN     | Q9Y6D6;E5RIF2;E  | Q9Y6D6;E5RIF2    | Brefeldin A-inhibi ARFGEF1       |                         |
|     | 27.8896 | 26.898  | 27.2724 | 27.7582 | 26.7758 | 27.2536 | 27.2912 | 27.2845 | 26.5239 | 27.1632 | 26.68   | 25.8025 | Q9Y6D5;E5RJN9    | Q9Y6D5           | Brefeldin A-inhibi ARFGEF2       |                         |
|     | 22.0365 | NaN     | 21.2153 | 21.7027 | NaN     | Q5TH69           | Q5TH69           | Brefeldin A-inhibi ARFGEF3       |                         |
|     | 25.7208 | 26.0473 | 25.8485 | 25.5375 | 25.9321 | 25.7022 | 24.555  | NaN     | NaN     | 23.8796 | 24.4482 | NaN     | P53367;P53367-2  | P53367;P53367-2  | Arfaptin-1 ARFIP1                |                         |
|     | 24.7768 | 25.181  | 24.6827 | 23.9359 | 24.7538 | 24.4182 | NaN     | NaN     | NaN     | 23.4695 | 24.1706 | 23.757  | P53365;A0A087X   | P53365;A0A087X   | Arfaptin-2 ARFIP2                |                         |
|     | 23.86   | NaN     | 23.3553 | 23.5022 | 23.3148 | 23.389  | 22.959  | NaN     | NaN     | NaN     | NaN     | NaN     | Q13795;Q13795-4  | Q13795;Q13795-4  | ADP-ribosylation f ARFRP1        |                         |
| NaN | NaN     | 22.9313 | NaN     | NaN     | 22.7517 | NaN     | P78540           | P78540           | Arginase-2, mitocl ARG2          |                         |
|     | 26.3756 | 26.2987 | 26.7997 | 26.2283 | 26.4228 | 26.5435 | 26.8234 | 25.0682 | 26.3267 | 26.8076 | 26.366  | 25.9539 | Q07960;HOYE29;E  | Q07960;HOYE29;E  | Rho GTPase-activ: ARHGAP1        |                         |
| NaN | NaN     | NaN     | 21.1622 | NaN     | Q6P4F7;H3BR51;C  | Q6P4F7;H3BR51;C  | Rho GTPase-activ: ARHGAP11A;ARHC |                         |
| NaN | NaN     | NaN     | 22.9331 | 22.1849 | NaN     | NaN     | NaN     | NaN     | NaN     | 22.8648 | NaN     | NaN     | Q8IWW6-2;Q8IW    | Q8IWW6-2;Q8IW    | Rho GTPase-activ: ARHGAP12       |                         |
|     | 23.0345 | NaN     | 23.1085 | 22.8662 | NaN     | NaN     | 23.6122 | NaN     | NaN     | 23.2578 | 23.5157 | NaN     | Q68EM7;Q68EM7    | Q68EM7;Q68EM7    | Rho GTPase-activ: ARHGAP17       |                         |
|     | 26.8295 | 26.0539 | 26.9282 | 26.5968 | 25.6687 | 26.9098 | 27.141  | 24.3121 | 23.5565 | 26.9918 | 26.9908 | 24.7707 | Q8N392;Q8N392-   | Q8N392;Q8N392-   | Rho GTPase-activ: ARHGAP18       |                         |



|     |         |         |         |         |         |         |         |         |         |         |         |         |                  |                  |                                     |
|-----|---------|---------|---------|---------|---------|---------|---------|---------|---------|---------|---------|---------|------------------|------------------|-------------------------------------|
|     | 27.4637 | 26.939  | 27.1059 | 26.4665 | 25.9782 | 26.1261 | 26.46   | 25.9231 | 25.4834 | 25.8992 | 25.6276 | 25.2502 | Q52LW3;F8VWZ8    | Q52LW3;F8VWZ8    | Rho GTPase-activ: ARHGAP29          |
| NaN | NaN     | NaN     | 22.0287 | NaN     | 21.7732 | NaN     | NaN     | NaN     | NaN     | 22.7529 | NaN     | NaN     | Q9NRY4;A2RRRES   | Q9NRY4;A2RRRES   | Rho GTPase-activ: ARHGAP35;GRLF1    |
| NaN | NaN     | NaN     | 23.1944 | 23.5984 | 22.3601 | NaN     | 23.3949 | NaN     | NaN     | 24.7837 | 23.3754 | 23.5293 | Q9COH5;Q9COH5    | Q9COH5;Q9COH5    | Rho GTPase-activ: ARHGAP39          |
|     | 22.7393 | NaN     | 23.017  | 22.5998 | 22.5714 | 23.2399 | NaN     | NaN     | NaN     | NaN     | NaN     | NaN     | Q13017;Q13017    | Q13017;Q13017    | Rho GTPase-activ: ARHGAP5           |
|     | 29.9723 | 30.8401 | 30.6915 | 30.1348 | 30.348  | 30.6451 | 30.5643 | 29.7013 | 29.6979 | 30.7624 | 30.4432 | 30.4188 | P52565;J3QXQ2;J  | P52565;J3QXQ2;J  | Rho GDP-dissocia: ARHGDIA           |
|     | 30.4055 | 30.8065 | 30.557  | 30.1392 | 30.1601 | 30.1673 | 30.257  | 29.159  | 29.2064 | 30.3301 | 30.4598 | 29.9727 | P52566;HOYGX7;F  | P52566;HOYGX7;F  | Rho GDP-dissocia: ARHGDI8           |
|     | 28.2964 | 27.5603 | 27.938  | 28.0667 | 27.6329 | 27.924  | 27.5066 | 27.868  | 27.5377 | 27.7808 | 27.9094 | 27.634  | Q92888;Q92888    | Q92888;Q92888    | Rho guanine nuck: ARHGEF1           |
|     | 24.6094 | 23.3322 | 24.3484 | 24.5426 | 23.6269 | 23.9384 | 25.2244 | 24.7271 | 24.4179 | 24.3527 | 23.8582 | NaN     | O15013;HOYAN8;I  | O15013;HOYAN8;I  | Rho guanine nuck: ARHGEF10          |
|     | 21.8923 | NaN     | Q9NZN5;Q9NZN5    | Q9NZN5;Q9NZN5    | Rho guanine nuck: ARHGEF12          |
|     | 24.9562 | 24.4812 | 24.5496 | 24.7636 | 24.5033 | 24.3717 | NaN     | NaN     | NaN     | 24.5515 | 24.3882 | NaN     | Q6Z5Z5;A0A087W   | Q6Z5Z5;A0A087W   | Rho guanine nuck: ARHGEF18          |
|     | 28.1564 | 27.0614 | 27.4261 | 27.6917 | 27.1206 | 26.9139 | 26.5608 | 27.0993 | 26.9016 | 26.5105 | 26.4045 | 26.4837 | Q92974;Q92974    | Q92974;Q92974    | Rho guanine nuck: ARHGEF2           |
|     | 25.0176 | 23.9996 | 24.5139 | 24.8552 | 23.929  | 24.3703 | 24.1139 | NaN     | 24.374  | 23.7895 | 23.7358 | 23.5979 | Q8N1W1;Q8N1W     | Q8N1W1;Q8N1W     | Rho guanine nuck: ARHGEF28          |
|     | 23.9869 | 23.5849 | 23.7869 | 23.9023 | 24.1011 | 24.1055 | NaN     | NaN     | NaN     | NaN     | NaN     | NaN     | Q8TER5;Q8TER5    | Q8TER5;Q8TER5    | Rho guanine nuck: ARHGEF40          |
|     | 23.3617 | 24.006  | 23.8901 | 23.2422 | 23.5793 | 23.207  | 24.448  | 23.9513 | NaN     | NaN     | NaN     | NaN     | Q14155-1;B1ALK7  | Q14155-1;B1ALK7  | Rho guanine nuck: ARHGEF7           |
|     | 24.1199 | NaN     | 23.9886 | 25.0022 | 23.4757 | 23.6037 | NaN     | NaN     | NaN     | 23.6203 | 24.0342 | NaN     | O14497;O14497    | Q14497;O14497    | AT-rich interactive: ARID1A         |
|     | 22.9491 | NaN     | 22.3423 | 22.7813 | NaN     | NaN     | NaN     | NaN     | NaN     | 23.458  | 22.7552 | NaN     | Q9Y4X5;A0A087W   | Q9Y4X5           | E3 ubiquitin-prote: ARIH1           |
|     | 23.9214 | NaN     | 23.1017 | 23.1937 | NaN     | 24.0014 | 23.9852 | NaN     | NaN     | 24.3414 | 24.0348 | 24.3821 | O95376;C9JZ71    | O95376           | E3 ubiquitin-prote: ARIH2           |
|     | 24.0357 | 25.8801 | 26.0341 | 26.2405 | 25.8555 | 25.9152 | 26.1603 | 25.9239 | 26.0706 | 25.235  | 25.4439 | 25.4446 | P40616;P40616    | P40616;P40616    | ADP-ribosylation: ARL1              |
|     | 23.0116 | 22.5044 | 23.364  | 22.9613 | 23.1644 | 23.3554 | 22.5475 | NaN     | NaN     | 23.6079 | 23.0423 | NaN     | Q35XY8;Q35XY8    | Q35XY8           | ADP-ribosylation: ARL13B            |
|     | 23.2564 | 22.624  | 23.296  | 23.3572 | 23.0696 | NaN     | NaN     | 22.762  | 23.5443 | 23.5342 | 23.3807 | NaN     | Q9NXU5;A0A087W   | Q9NXU5;A0A087W   | ADP-ribosylation: ARL15             |
|     | 26.5928 | 26.201  | 25.8809 | 26.6687 | 25.6444 | 25.4859 | 24.7662 | 25.2086 | 25.2454 | 25.9296 | 25.2284 | 24.689  | P36404;V9GYD0;F  | P36404;V9GYD0;F  | ADP-ribosylation: ARL2;ARL2-SNX15   |
| NaN | NaN     | NaN     | NaN     | NaN     | NaN     | NaN     | NaN     | NaN     | NaN     | NaN     | NaN     | 24.4722 | Q9Y2Y0;H3BU49;I  | Q9Y2Y0;H3BU49;I  | ADP-ribosylation: ARL2BP            |
|     | 26.122  | 26.5254 | 26.2547 | 25.4036 | 26.6962 | 26.3331 | 25.3038 | 25.634  | 26.3677 | 26.0002 | 26.5246 | 26.3669 | P36405           | P36405           | ADP-ribosylation: ARL3              |
| NaN | NaN     | NaN     | NaN     | NaN     | NaN     | NaN     | 22.8404 | NaN     | NaN     | NaN     | NaN     | NaN     | Q96KC2;Q9Y689;C  | Q96KC2;Q9Y689;C  | ADP-ribosylation: ARL5B;ARLSA       |
| NaN | NaN     | NaN     | 21.8333 | 21.5748 | NaN     | 22.0815 | NaN     | NaN     | NaN     | NaN     | 22.5058 | NaN     | Q66PJ3;Q66PJ3    | Q66PJ3;Q66PJ3    | ADP-ribosylation: ARL6IP4           |
|     | 25.1839 | 24.168  | 24.4833 | 25.0065 | 23.3683 | 23.943  | 25.6106 | 23.5889 | 24.5856 | 25.1646 | 24.1084 | NaN     | Q75915;F8WF90;C  | Q75915;F8WF90;C  | PRA1 family prote: ARL6IP5          |
|     | 22.4154 | NaN     | Q96BM9;A0A087W   | Q96BM9;A0A087W   | ADP-ribosylation: ARL8A             |
|     | 26.0305 | 25.5682 | 25.222  | 25.5065 | 25.2834 | 25.2675 | 26.0845 | NaN     | 26.2497 | 25.7901 | 25.715  | 26.5759 | Q9NVJ2;Q9NVJ2    | Q9NVJ2           | ADP-ribosylation: ARL8B             |
|     | 26.5842 | 26.0744 | 26.321  | 26.5175 | 26.0543 | 26.4419 | 26.1681 | 26.5647 | 26.2847 | 26.6479 | 26.7275 | 26.7837 | Q6NXE6;Q6NXE6    | Q6NXE6           | Armadillo repeat: ARMC6             |
|     | 22.6672 | NaN     | NaN     | 23.0941 | 22.4428 | NaN     | NaN     | NaN     | NaN     | 22.5583 | NaN     | NaN     | Q8IUR7;Q8IUR7    | Q8IUR7;Q8IUR7    | Armadillo repeat: ARMC8             |
|     | 22.1556 | NaN     | 21.2317 | 22.0498 | NaN     | 21.2951 | NaN     | NaN     | NaN     | NaN     | NaN     | NaN     | Q7Z3E5;A0A087X   | Q7Z3E5;A0A087X   | LisH domain-cont: ARMC9             |
|     | 21.8987 | NaN     | 21.5758 | 21.9569 | NaN     | Q7L311           | Q7L311           | Armadillo repeat: ARMCX2            |
|     | 22.2389 | NaN     | NaN     | NaN     | NaN     | 22.2452 | NaN     | NaN     | NaN     | NaN     | NaN     | NaN     | Q9UH62           | Q9UH62           | Armadillo repeat: ARMCX3            |
|     | 23.2044 | 24.1402 | 23.2356 | 22.6891 | 23.1322 | 23.1225 | 23.2473 | NaN     | NaN     | 23.4324 | 23.0947 | NaN     | Q9H993;F5GZY1    | Q9H993;F5GZY1    | Protein-glutamate: ARMT1            |
|     | 27.3222 | 27.5597 | 27.6668 | 27.5211 | 27.8634 | 27.7895 | 27.9443 | 27.9375 | 27.563  | 28.7349 | 28.6568 | 27.6282 | Q92747;E9PF58;C  | Q92747;E9PF58;C  | Actin-related prot: ARPC1A          |
|     | 28.6475 | 28.9392 | 29.0858 | 28.9581 | 29.2137 | 29.461  | 29.0971 | 29.27   | 28.6744 | 29.7533 | 29.6068 | 29.277  | O15143;C9J4Z7;F  | O15143           | Actin-related prot: ARPC1B          |
|     | 29.5294 | 29.74   | 29.6187 | 29.1759 | 29.7187 | 29.7337 | 29.9598 | 29.8132 | 29.4336 | 30.3251 | 30.2165 | 29.9306 | O15144;C9JTV5;G  | O15144           | Actin-related prot: ARPC2           |
|     | 29.3436 | 29.4889 | 29.1102 | 28.9488 | 29.1403 | 29.0895 | 29.6368 | 29.6269 | 29.0771 | 30.2056 | 29.87   | 29.3293 | O15145;C9JZD1;F  | O15145;C9JZD1    | Actin-related prot: ARPC3           |
|     | 28.462  | 28.7272 | 28.897  | 28.5925 | 29.0715 | 29.1612 | 28.8815 | 28.114  | 28.8272 | 28.9835 | 29.3196 | 29.1894 | P59998;P59998    | P59998;P59998    | Actin-related prot: ARPC4;ARPC4-TTL |
|     | 27.1412 | 28.169  | 27.6707 | 27.4446 | 27.8764 | 27.8229 | 27.964  | 28.2756 | 28.4089 | 28.3214 | 28.4679 | 28.2623 | O15511;B1ALC0;C  | O15511;B1ALC0;C  | Actin-related prot: ARPC5           |
|     | 26.3549 | 26.478  | 26.3794 | 26.2532 | 26.8167 | 26.5689 | 26.064  | 26.2548 | 25.939  | 27.0215 | 26.9035 | 26.7001 | Q9BPX5           | Q9BPX5           | Actin-related prot: ARPC5L          |
| NaN | NaN     | 23.8025 | 23.2677 | 23.0679 | 23.3232 | 23.048  | 23.9266 | 23.701  | NaN     | 24.0679 | 23.6914 | 23.6604 | Q7Z6K5;A0A0A6Y   | Q7Z6K5;A0A0A6Y   | Arpin: ARPIN;C15orf38-A             |
|     | 24.0842 | 24.6153 | 24.3623 | 23.946  | 24.7666 | 25.0475 | 25.0863 | 24.6788 | 25.0705 | 25.348  | 25.2131 | NaN     | P49407;P49407    | P49407;P49407    | Beta-arrestin-1: ARRB1              |
|     | 23.4334 | NaN     | 22.9199 | 22.9998 | 22.6318 | NaN     | NaN     | NaN     | NaN     | 22.9928 | 23.0593 | NaN     | P32121;J3L412;K7 | P32121;J3L412;K7 | Beta-arrestin-2: ARRB2              |
|     | 23.2874 | 23.4968 | 23.8074 | 22.8909 | 23.4599 | 23.9831 | 23.4706 | NaN     | 23.2877 | 24.1769 | 24.075  | NaN     | Q8N5I2;Q5T370;F  | Q8N5I2;Q5T370;F  | Arrestin domain-c: ARRD1            |
|     | 21.7293 | NaN     | Q96B67           | Q96B67           | Arrestin domain-c: ARRD3            |
|     | 23.5558 | 23.5561 | 23.1752 | 22.8611 | 22.5934 | 23.0932 | 24.9875 | 23.4447 | 23.6006 | 23.2084 | NaN     | 23.1237 | Q13510;E7EMM4    | Q13510;E7EMM4    | Acid ceramidase: ASA1               |
|     | 25.8011 | 25.0299 | 25.5982 | 25.4774 | 24.7661 | 25.2554 | 25.0825 | 24.5437 | NaN     | 24.5753 | 24.6043 | 23.6277 | Q9ULH1;A0A0A0I   | Q9ULH1;A0A0A0I   | Arf-GAP with SH3: ASAP1             |
| NaN | NaN     | NaN     | NaN     | 21.7361 | NaN     | Q43150;Q43150    | Q43150;Q43150    | Arf-GAP with SH3: ASAP2             |
|     | 22.4049 | NaN     | 22.3171 | 22.4861 | 22.935  | NaN     | NaN     | NaN     | NaN     | 22.5191 | NaN     | NaN     | Q9NWX5;F6TX30    | Q9NWX5;F6TX30    | Ankyrin repeat: ASB6                |
|     | 24.0172 | NaN     | 23.2269 | 23.3889 | NaN     | Q9H118;Q9H118    | Q9H118;Q9H118    | Activating signal: ASCC2            |
|     | 26.454  | 24.7829 | 25.8435 | 26.0892 | 25.1587 | 25.484  | 24.7081 | 24.3259 | NaN     | 25.477  | 25.3576 | 24.4571 | Q8N3C0;Q8N3C0    | Q8N3C0           | Activating signal: ASCC3            |
|     | 22.9226 | NaN     | 23.3864 | 22.6848 | 23.6256 | NaN     | NaN     | NaN     | NaN     | 22.8543 | NaN     | NaN     | Q9NVP2;K7ES22;K  | Q9NVP2;K7ES22;K  | Histone chaperon: ASF1B             |
|     | 23.4937 | NaN     | 22.7524 | 23.0104 | NaN     | NaN     | NaN     | NaN     | NaN     | 23.6407 | 22.8097 | NaN     | Q9UBL3;F5H8F7;C  | Q9UBL3;F5H8F7;C  | Set1/Asb2 histone: ASH2L            |
|     | 24.2007 | 24.5407 | 24.4904 | 24.2701 | 24.34   | 24.2916 | NaN     | NaN     | NaN     | 23.9718 | 23.5536 | NaN     | O95671;O95671    | Q95671;O95671    | 2-N-acetylserotonin: ASMTL          |
|     | 26.4992 | 26.3258 | 26.4715 | 26.4126 | 26.4461 | 26.5633 | 26.8946 | 26.9752 | 27.4639 | 26.5141 | 26.901  | 27.2616 | Q43681;A0A087W   | Q43681;A0A087W   | ATPase ASNA1: ASNA1                 |
|     | 28.5609 | 28.1816 | 28.0826 | 27.942  | 27.8777 | 27.7834 | 27.901  | 27.826  | 27.4576 | 29.0743 | 28.7244 | 28.0683 | P08243;P08243    | P08243;P08243    | Asparagine synthetase: ASNS         |
|     | 25.3561 | 25.2011 | 25.3682 | 25.5859 | 25.1597 | 25.3783 | 25.2816 | 25.8518 | 26.6227 | 25.6088 | 25.446  | 25.4064 | Q12797;Q12797    | Q12797;Q12797    | 1-Aspartyl/asparaginyl: ASPH        |
|     | 24.1969 | 23.6801 | 23.4206 | 23.7756 | 24.2417 | NaN     | NaN     | NaN     | NaN     | 23.1496 | 24.2097 | NaN     | Q9BZE9;Q9BZE9    | Q9BZE9;Q9BZE9    | 2 Tether containing: ASPSCR1        |
|     | 24.5766 | 25.3199 | 24.3851 | 23.2545 | 24.688  | 24.4463 | 23.3958 | NaN     | NaN     | NaN     | 23.5485 | NaN     | P00966;Q5T6L5;Q  | P00966           | Argininosuccinate: ASS1             |



|         |         |         |         |         |         |         |         |         |         |         |         |                                                                   |
|---------|---------|---------|---------|---------|---------|---------|---------|---------|---------|---------|---------|-------------------------------------------------------------------|
| NaN     | 21.0356 | NaN     | 21.2293 | 21.4378 | NaN     | NaN     | NaN     | NaN     | NaN     | 21.9197 | 21.431  | Q9NVNM9;F5H5W; Q9NVNM9;F5H5W1 Protein asunder h ASUN              |
| 23.1596 | NaN     | 22.9646 | 23.1187 | NaN     | Q8NBU5;Q8NBU5 Q8NBU5;Q8NBU5 ATPase family AA; ATAD1               |
| 25.3765 | 25.9594 | 25.2364 | 25.3073 | 26.1312 | 25.182  | 25.6219 | 26.3091 | 27.1341 | 24.5115 | 25.6714 | 25.8092 | Q9NV17-2;Q9NV17-2;Q9NV17 ATPase family AA; ATAD3A;ATAD3B          |
| 24.8871 | 24.7776 | 24.7631 | 25.023  | 24.9342 | 24.3467 | 24.4817 | 24.5626 | 25.4005 | 25.1223 | 25.3679 | 25.51   | O95260;H0Y5C2;E O95260;H0Y5C2;E Arginyl-tRNA--pro ATE1            |
| 23.3097 | 23.3543 | NaN     | Q9BSB4;F8VQD9; Q9BSB4;F8VQD9;I Autophagy-relate ATG101            |
| 22.6411 | NaN     | 22.7345 | NaN     | 22.6167 | NaN     | 22.6301 | NaN     | NaN     | NaN     | NaN     | NaN     | Q676U5-2;Q676U Q676U5-2;Q676U Autophagy-relate ATG16L1            |
| 26.5115 | 24.5731 | 25.2356 | 26.1913 | 25.0246 | 24.782  | 24.9543 | 24.6219 | 23.4026 | 24.5118 | 24.1445 | 23.0441 | Q2TAZ0;Q2TAZ0-; Q2TAZ0;Q2TAZ0-; Autophagy-relate ATG2A            |
| 24.8611 | 24.5345 | 24.7026 | 24.8089 | 24.7124 | 24.624  | 25.2739 | 25.2852 | 25.2477 | 24.3538 | 24.9449 | 25.2039 | Q9NT62;Q9NT62- Q9NT62;Q9NT62- Ubiquitin-like-con ATG3             |
| NaN     | NaN     | 20.7881 | NaN     | Q9Y4P1;C9IQ72;C Q9Y4P1;C9IQ72;C Cysteine protease ATG4B           |
| 24.0407 | 23.9423 | 23.7029 | 23.4142 | 23.7184 | 24.1242 | NaN     | NaN     | NaN     | 23.7914 | 23.5228 | 23.5596 | Q9H1Y0;L7UQJ2;C Q9H1Y0;L7UQJ2;C Autophagy protei ATG5             |
| 25.0947 | 24.3424 | 24.4291 | 24.9711 | 24.512  | 24.2167 | 24.722  | 23.7524 | 25.5124 | 25.1016 | 25.0451 | 25.3131 | O95352;O95352-; O95352;O95352-2 Ubiquitin-like mor ATG7           |
| 24.2845 | 23.9171 | 24.3844 | 24.126  | 24.0953 | 23.9009 | 24.9587 | 24.8379 | 23.9929 | 24.139  | 23.2544 | 24.0807 | Q7Z3C6;Q7Z3C6-; Q7Z3C6;Q7Z3C6-2 Autophagy-relate ATG9A            |
| 30.4928 | 30.1825 | 30.1174 | 30.3427 | 30.1833 | 30.1261 | 30.2365 | 29.9313 | 29.9404 | 30.4861 | 30.3827 | 30.3093 | P31939;P31939-2 P31939;P31939-2 Bifunctional purin ATIC           |
| 24.6754 | 25.2791 | 25.4212 | 25.1352 | 25.7195 | 25.7362 | 25.7997 | 25.9603 | 26.201  | 26.0666 | 25.7398 | 25.9679 | Q8NHH9;Q8NHH; Q8NHH9;Q8NHH; Atlantin-2 ATL2                       |
| NaN     | 20.2068 | NaN     | F5H617 F5H617 ATL3                                                |
| 28.072  | 27.8511 | 28.3342 | 28.05   | 28.0313 | 28.313  | 28.9362 | 29.021  | 28.956  | 29.6611 | 28.8674 | 28.6941 | Q6DD88;F5GWF8 Q6DD88 Atlatin-3 ATL3                               |
| 24.5748 | 23.3541 | 24.5628 | 25.0308 | 24.3762 | 24.9279 | NaN     | NaN     | NaN     | 23.8642 | 23.8841 | NaN     | Q13315;E9PIN0;Q Q13315 Serine-protein kin ATM                     |
| 24.9326 | 24.1717 | 24.0713 | 24.2435 | 23.8329 | NaN     | 25.5944 | NaN     | NaN     | NaN     | NaN     | 24.094  | O00244;E5RGN3; O00244;E5RGN3;I Copper transport ATOX1             |
| 25.0152 | NaN     | 25.8479 | 25.2412 | 25.3151 | NaN     | 25.6265 | 25.8507 | 26.0478 | 26.1702 | 24.8128 | 26.0516 | P98196;H0Y547;E P98196;H0Y547;E Probable phosphc ATP11A           |
| 25.4734 | 24.8515 | 26.135  | 25.5028 | 24.6693 | 25.4911 | 24.3429 | 23.7311 | 22.8746 | 24.5906 | 23.5197 | 23.9973 | Q9Y2G3;H7C4W6 Q9Y2G3;H7C4W6 Probable phosphc ATP11B               |
| 24.2842 | 24.1389 | 25.1786 | 24.583  | 24.4323 | 25.1539 | 24.0373 | NaN     | 24.1166 | 25.5606 | 24.9866 | 24.9418 | A0A067XG54;Q8N A0A067XG54;Q8N Phospholipid-tran ATP11C            |
| NaN     | NaN     | NaN     | 21.7199 | NaN     | NaN     | NaN     | NaN     | 22.3504 | 22.2954 | 22.0745 | NaN     | Q9HD20;Q9HD20 Q9HD20;Q9HD20- Manganese-trans ATP13A1              |
| 22.1189 | NaN     | 21.5502 | NaN     | Q9NQ11;Q9NQ11 Q9NQ11;Q9NQ11 Probable cation-tr ATP13A2            |
| 26.1198 | 26.1667 | 26.5133 | 26.5761 | 26.2789 | 26.2938 | 24.7504 | NaN     | 25.265  | 25.897  | 25.7642 | 25.297  | Q9H7F0;A0A087V Q9H7F0;A0A087V Probable cation-tr ATP13A3          |
| 33.5698 | 32.9721 | 33.8183 | 33.8149 | 33.151  | 34.1024 | 33.6904 | 32.883  | 33.5383 | 34.4158 | 33.8159 | 34.0685 | P05023;P05023-4 P05023;P05023-4 Sodium/potassiun ATP1A1           |
| 30.4843 | 29.8045 | 30.6239 | 30.5373 | 29.8564 | 30.8675 | 30.4186 | 29.3249 | 29.2522 | 30.9606 | 30.2931 | 30.5308 | P05026;P05026-2 P05026;P05026-2 Sodium/potassiun ATP1B1           |
| 31.0003 | 29.9471 | 31.0514 | 31.3513 | 30.2859 | 31.2802 | 31.2426 | 30.5942 | 30.7961 | 32.0411 | 31.4886 | 31.5798 | P54709;C9JA36;P P54709 Sodium/potassiun ATP1B3                    |
| 29.2555 | 28.7045 | 28.8874 | 29.2922 | 28.573  | 28.8587 | 29.4617 | 29.0771 | 29.0759 | 29.3908 | 28.5637 | 28.3845 | P16615;P16615-5 P16615;P16615-5 Sarcoplasmic/end ATP2A2           |
| 30.6998 | 30.7392 | 31.4916 | 30.8963 | 31.0757 | 31.8059 | 31.2134 | 30.8612 | 31.4117 | 31.8646 | 31.4432 | 32.124  | P20020;P20020-6 P20020;P20020-6 Plasma membran ATP2B1             |
| 26.7693 | 26.7991 | 27.5915 | 26.6786 | 27.2553 | 27.8956 | 27.2285 | NaN     | 27.8482 | 27.9659 | 27.5973 | 28.4442 | Q16720;Q16720-; Q16720;Q16720-2 Plasma membran ATP2B3             |
| 26.9385 | 26.8198 | 27.6668 | 27.3605 | 27.1184 | 28.0401 | 27.3848 | 26.6442 | 27.4122 | 28.5309 | 27.4937 | 27.8379 | P23634;P23634-6 P23634;P23634-6 Plasma membran ATP2B4             |
| 25.5038 | 25.2693 | 25.3635 | 25.242  | 24.9923 | 25.3434 | 25.1297 | 24.9297 | 25.4568 | 24.9665 | 24.6284 | 25.2561 | P98194;P98194-8 P98194;P98194-8 Calcium-transport ATP2C1          |
| 28.906  | 29.8779 | 29.3324 | 29.5375 | 29.8698 | 29.4314 | 28.9515 | 30.0989 | 31.0465 | 28.3053 | 29.1346 | 29.6583 | P25705;P25705-2 P25705;P25705-2 ATP synthase sub ATP5A1           |
| 29.3082 | 30.2075 | 29.5367 | 29.6818 | 30.2606 | 29.6965 | 29.0082 | 30.7204 | 31.5814 | 29.1286 | 29.9963 | 30.2186 | P06576;H0YH81;F P06576;H0YH81;F ATP synthase sub ATP5B            |
| 24.4445 | 25.2953 | 24.8655 | 25.0744 | 25.2362 | 24.7354 | 23.6878 | 25.3567 | 26.0781 | 23.7784 | 23.8898 | 24.8606 | P36542;P36542-2 ATP synthase sub ATP5C1                           |
| NaN     | NaN     | NaN     | 20.1745 | NaN     | P30049 P30049 ATP synthase sub ATP5D                              |
| NaN     | 25.0329 | 24.5177 | 24.3179 | 25.1534 | NaN     | P56381;Q5VTU8 P56381;Q5VTU8 ATP synthase sub ATP5E;ATP5EP2        |
| 24.315  | 24.532  | 24.4359 | 24.6968 | 24.6559 | 24.7695 | 23.801  | 24.8895 | NaN     | 23.2149 | 23.5703 | 24.4248 | P24539;Q5QN22 P24539;Q5QN22 ATP synthase F(0) ATP5F1              |
| 25.365  | 26.2261 | 25.4747 | 25.7347 | 26.1158 | 25.6136 | 25.4254 | 26.5469 | 27.3665 | 24.1257 | 25.0735 | 25.9656 | O75947;O75947-; O75947;O75947-2 ATP synthase sub ATP5H            |
| NaN     | 24.9888 | 24.4862 | 24.5564 | 25.3421 | 24.7309 | NaN     | NaN     | 26.8439 | NaN     | NaN     | NaN     | P56385 P56385 ATP synthase sub ATP5I                              |
| 22.8212 | 24.3686 | 23.7313 | 23.2228 | 23.7753 | 23.8182 | 23.2005 | 25.0868 | 24.7862 | NaN     | 23.1513 | 23.4046 | P18859;A8MUH2; P18859;A8MUH2; ATP synthase-cou ATP5J              |
| NaN     | NaN     | 23.1311 | 23.6027 | NaN     | NaN     | NaN     | 23.174  | 24.3889 | NaN     | NaN     | 22.9738 | G3V325;P56134-4 G3V325;P56134-4 ATP synthase sub ATP5J2-PTCD1;ATI |
| 24.7159 | 25.3349 | 25.3027 | 24.9389 | 25.7378 | 25.204  | NaN     | NaN     | 26.3136 | NaN     | 23.7894 | 25.3231 | O75964;E9PN17 O75964;E9PN17 ATP synthase sub ATP5L                |
| 25.4774 | 26.6046 | 26.0769 | 26.0981 | 26.7661 | 26.4271 | 25.3056 | 27.2605 | 28.2752 | 24.884  | 26.2311 | 26.6524 | P48047;H7C0C1;P P48047;H7C0C1 ATP synthase sub ATP5O              |
| 24.9298 | 24.6997 | 24.9882 | 25.0765 | 24.4468 | 24.7814 | 26.0365 | NaN     | 26.2637 | 25.3051 | 23.8983 | 25.7451 | Q15904;A0A0C4D Q15904;A0A0C4D V-type proton At ATP6AP1            |
| 24.7679 | 24.2727 | 24.6353 | 23.6299 | 24.5224 | 23.595  | 27.2507 | 25.9467 | 25.2004 | 25.9322 | 24.1057 | 23.6991 | O75787;O75787-; O75787;O75787-2 Renin receptor ATP6AP2            |
| 27.0073 | 26.5805 | 26.7643 | 27.3092 | 26.5911 | 26.7686 | 25.9854 | 25.5929 | 26.547  | 25.9015 | 25.3453 | 26.0577 | Q93050-3;Q9305 Q93050-3;Q9305C V-type proton At ATP6V0A1          |
| 25.2096 | 24.3897 | 24.669  | 24.5961 | 24.4007 | 24.6031 | 24.5566 | 25.2397 | 24.5053 | 24.0158 | 23.7895 | 24.1937 | Q9Y487;F5H5F3;C Q9Y487;F5H5F3 V-type proton At ATP6V0A2           |
| NaN     | 23.5972 | NaN     | NaN     | NaN     | P27449 P27449 V-type proton At ATP6V0C                            |
| 26.8277 | 27.0257 | 26.7312 | 27.0647 | 26.9358 | 26.7772 | 25.2443 | 25.369  | 24.0947 | 25.685  | 25.6893 | 25.84   | P61421;F5GYQ1;P P61421;F5GYQ1;R V-type proton At ATP6V0D1         |
| NaN     | NaN     | NaN     | NaN     | NaN     | NaN     | 22.7839 | NaN     | NaN     | NaN     | NaN     | NaN     | Q8N8Y2 Q8N8Y2 V-type proton At ATP6V0D2                           |
| 28.3405 | 29.0856 | 28.5606 | 28.3989 | 28.9376 | 28.7033 | 28.4101 | 28.8044 | 28.6612 | 28.2104 | 28.4947 | 28.5316 | P38606;P38606-2 P38606;P38606-2 V-type proton At ATP6V1A          |
| 27.9565 | 28.887  | 28.241  | 27.8392 | 28.7153 | 28.2122 | 28.1899 | 28.7588 | 28.3106 | 27.8817 | 28.0724 | 28.5738 | P21281;H0YC04;P P21281 V-type proton At ATP6V1B2                  |
| 26.2342 | 25.4093 | 25.2738 | 25.9909 | 25.258  | 25.4713 | 25.7647 | NaN     | 25.5182 | 25.3376 | 24.9943 | 25.4378 | P21283;E7EV59 P21283;E7EV59 V-type proton At ATP6V1C1             |
| 24.2931 | 24.2282 | 24.2315 | 24.5993 | 23.9024 | 24.2404 | 23.518  | NaN     | NaN     | 23.797  | 23.1576 | NaN     | Q9Y5K8;G3V559;C Q9Y5K8;G3V559;C V-type proton At ATP6V1D          |
| 27.4182 | 27.7486 | 27.3241 | 27.0543 | 27.5793 | 27.1656 | 27.1182 | 27.4317 | 27.4233 | 26.8677 | 26.9037 | 27.2808 | P36543;P36543-2 P36543;P36543-2 V-type proton At ATP6V1E1         |
| NaN     | NaN     | NaN     | NaN     | 23.2636 | NaN     | NaN     | 24.4531 | NaN     | NaN     | NaN     | NaN     | Q16864;Q16864-; Q16864;Q16864-2 V-type proton At ATP6V1F          |
| 26.1089 | 26.5093 | 26.0878 | 25.5963 | 26.3365 | 26.1516 | 26.1966 | 26.4816 | 25.5983 | 25.66   | 25.6875 | 26.065  | O75348;O95670;F O75348 V-type proton At ATP6V1G1                  |
| 26.3358 | 26.1833 | 26.5161 | 26.2682 | 26.2331 | 26.543  | 26.2268 | 26.6517 | 26.4769 | 26.1535 | 26.216  | 26.2187 | Q9U112;Q9U112-2 Q9U112;Q9U112-2 V-type proton At ATP6V1H          |
| 23.1759 | NaN     | 23.6156 | 23.857  | 22.872  | 23.6565 | NaN     | NaN     | NaN     | 23.5546 | 23.0606 | 23.456  | O43520;K7EQC4 O43520 Phospholipid-tran ATP8B1                     |



|     |         |         |         |         |         |         |         |         |         |         |         |         |         |                 |                                                  |
|-----|---------|---------|---------|---------|---------|---------|---------|---------|---------|---------|---------|---------|---------|-----------------|--------------------------------------------------|
| NaN | NaN     | NaN     |         | 22.3448 | NaN     | NaN     | NaN     | NaN     | NaN     | NaN     | 22.3972 | NaN     | NaN     | O75110;A0A0A0N  | O75110;A0A0A0N Probable phosphc ATP9A            |
| NaN | NaN     | NaN     | NaN     | NaN     | NaN     | NaN     | NaN     | NaN     | NaN     | NaN     |         | 19.3528 | NaN     | O43861;O43861-2 | O43861;O43861-2 Probable phosphc ATP9B           |
| NaN | NaN     | NaN     | NaN     | NaN     | NaN     | NaN     |         | 29.1053 | NaN     | NaN     | NaN     | NaN     | NaN     | E9PPX6;Q5TC12-3 | E9PPX6;Q5TC12-3 ATPAF1                           |
|     | 23.5326 | 25.9422 | 24.0024 | 24.0486 | 26.5839 | 24.0541 | 25.8928 | 26.6384 | 25.472  | 24.1402 | 24.6093 | NaN     | NaN     | Q9UII2;A0A0B4J2 | Q9UII2;A0A0B4J2 ATPase inhibitor, i ATPIF1       |
|     | 23.2917 | NaN     | 23.3026 | 23.5264 | NaN     | NaN     | NaN     | NaN     | NaN     | NaN     |         | 23.0069 | NaN     | Q13535;Q13535-7 | Q13535;Q13535-7 Serine/threonine- ATR            |
| NaN |         | 23.9128 | NaN     | 22.8284 | NaN     | 23.9201 | 24.0078 | NaN     | 23.8056 | 23.7823 | 24.2247 | 23.8279 |         | O75882;O75882-3 | O75882;O75882-3 Attractin ATRN                   |
| NaN |         | NaN     | NaN     | 22.2557 | NaN     | P46100;P46100-4 | P46100;P46100-4 Transcriptional rej ATRX         |
|     | 26.3385 | 25.2764 | 25.7429 | 26.0758 | 25.1412 | 25.5487 | 26.0177 | 25.0683 | 25.1026 | 25.7265 | 25.5225 | 25.2118 |         | Q9UBB4;Q9UBB4   | Q9UBB4;Q9UBB4 Ataxin-10 ATXN10                   |
|     | 25.2575 | 24.8031 | NaN     | 24.5072 | 24.4039 | NaN     | NaN     | NaN     | NaN     | NaN     |         | 23.9802 | NaN     | Q99700;H0YH87;f | Q99700;H0YH87;f Ataxin-2 ATXN2                   |
|     | 28.0264 | 28.218  |         | 27.1503 | 28.1006 | 27.1054 | 25.9439 | 26.3663 | 24.1297 | 25.6696 | 26.2862 | 25.0439 |         | Q8WWM7;Q8WM     | Q8WWM7;Q8WM Ataxin-2-like prot ATRXN2L           |
|     | 22.8287 | NaN     |         | 22.805  | 22.6048 | NaN     | 22.7358 | 22.5721 | NaN     | NaN     | 22.7771 | NaN     | NaN     | F5H211          | F5H211 ATXN3                                     |
|     | 24.2031 | 24.6103 | 24.9456 | 24.66   | 24.3147 | 24.8565 | 25.7283 | NaN     | 25.2802 | 25.3847 | NaN     | NaN     |         | Q9Y679;Q9Y679-3 | Q9Y679;Q9Y679-3 Ancient ubiquitou AUP1           |
|     | 24.6253 | 24.7789 | 26.1539 | 25.6182 | 26.1391 | 26.0162 | 24.9882 | 23.5551 | 24.4782 | 26.4067 | 26.7418 | 26.0691 |         | O14965;A3KFJ0;Q | O14965;A3KFJ0;Q Aurora kinase A AURKA            |
|     | 26.074  | 26.1054 | 26.4272 | 26.2446 | 26.3147 | 26.2274 | 27.8895 | 27.3705 | 27.7167 | 26.7552 | 26.64   | 26.268  |         | Q96GD4;Q96GD4   | Q96GD4;Q96GD4 Aurora kinase B AURKB              |
|     | 22.4733 | NaN     | Q8NBF6;B8ZZW5;  | Q8NBF6;B8ZZW5; Late secretory pat AVL9           |
|     | 26.0684 | 26.3142 | 26.6517 | 25.9928 | 25.7745 | 26.4677 | 26.971  | 26.9739 | 26.7248 | 26.1287 | 25.2922 | 25.5696 |         | P30530;P30530-2 | P30530;P30530-2 Tyrosine-protein k AXL           |
|     | 21.6665 | NaN     | Q9H6S1;C9JVK8;C | Q9H6S1;C9JVK8;C 5-azacytidine-indi AZI2          |
|     | 31.0262 | 32.9621 | 32.8371 | 31.8136 | 33.2352 | 32.9706 | 31.9727 | 33.3378 | 33.3048 | 32.0609 | 32.4963 | 32.2731 |         | P61769;H0YLF3;F | P61769;H0YLF3;F Beta-2-microglob B2M             |
|     | 24.9678 | NaN     | 25.2541 | 24.6709 | NaN     | 24.8625 | 25.5208 | NaN     | NaN     | 24.834  | NaN     | NaN     |         | O94766;G3V150;C | O94766;G3V150;C Galactosylgalact B3GAT3          |
| NaN |         | NaN     | NaN     | NaN     | NaN     | NaN     | 24.7303 | NaN     | NaN     | NaN     | NaN     | NaN     | NaN     | P15291;P15291-2 | P15291;P15291-2 Beta-1,4-galactos B4GALT1        |
|     | 21.5316 | NaN     | NaN     | NaN     | 21.6337 | NaN     | 24.4319 | NaN     | NaN     | NaN     | NaN     | NaN     | NaN     | O43286          | O43286 Beta-1,4-galactos B4GALT5                 |
|     | 20.4743 | NaN     | O43505          | O43505 Beta-1,4-glucuron B4GAT1                  |
|     | 24.8728 | 24.9132 | 24.9018 | 24.5246 | 24.876  | 25.1214 | 25.2237 | 24.8308 | 25.0979 | NaN     | NaN     | 25.0662 | 24.9197 | Q9NWW8;M0R0I0   | Q9NWW8;M0R0I0 BRIS and BRCA1 BABAM1              |
|     | 22.1708 | 22.5423 | NaN     | 21.2105 | NaN     | Q92934;F5GY53;A | Q92934;F5GY53;A Bcl2-associated a BAD            |
|     | 28.0879 | 28.342  | 28.1638 | 28.2598 | 28.5735 | 28.3109 | 27.6954 | 28.7476 | 28.1493 | 28.1424 | 28.4038 | 28.6878 |         | O95816;O95816-7 | O95816;O95816-7 BAG family molec BAG2            |
|     | 26.9114 | 27.6169 | 27.0791 | 26.5976 | 27.3565 | 26.8972 | 26.9163 | 27.431  | 27.3609 | 26.7925 | 27.1344 | 27.493  |         | O95817;C9JFK9   | O95817 BAG family molec BAG3                     |
|     | 22.8015 | 23.6361 | 23.4878 | 23.6441 | 23.8689 | 23.6957 | 23.4153 | 24.3537 | 24.3196 | 24.0243 | 23.7298 | 24.5203 |         | Q9UL15;Q9UL15-7 | Q9UL15;Q9UL15-7 BAG family molec BAG5            |
|     | 27.8689 | 27.3853 | 27.667  | 28.11   | 27.5749 | 27.8333 | 24.879  | 27.2577 | 26.7912 | 27.2555 | 26.9747 | 27.0859 |         | P46379;A0A024R  | P46379;A0A024R Large proline-rich BAG6;BAT3      |
|     | 27.6382 | 28.1242 | 28.0867 | 27.5497 | 27.9748 | 28.0482 | 26.8442 | 26.2241 | 27.119  | 27.8077 | 27.8574 | 27.8611 |         | Q9UQB8-5;I3L4C2 | Q9UQB8-5;I3L4C2 Brain-specific ang BAIAP2        |
| NaN |         | 22.5842 | 22.3295 | NaN     | 22.3797 | NaN     | Q9UHR4          | Q9UHR4 Brain-specific ang BAIAP2L1               |
|     | 27.8897 | 29.0432 | 28.4508 | 28.3003 | 28.7867 | 28.2297 | 29.2445 | 28.4229 | 27.8697 | 28.8289 | 29.0199 | 28.3317 |         | O75531          | O75531 Barrier-to-autoint BANF1                  |
|     | 24.8225 | 24.9034 | 24.423  | 24.4974 | 24.7133 | 24.346  | 23.0362 | 24.1708 | NaN     | 23.9198 | 23.59   | 23.7506 |         | Q8IXM2;Q8IXM2-2 | Q8IXM2;Q8IXM2-2 Chromatin complt BAP18;C1orf49;R |
|     | 31.9453 | 31.3178 | 31.4998 | 31.3539 | 30.9009 | 31.5782 | 31.9796 | 29.7052 | 29.9431 | 32.3745 | 31.2243 | 30.3029 |         | P80723;P80723-2 | P80723;P80723-2 Brain acid soluble BASP1         |
|     | 25.584  | 25.301  | 25.7575 | 25.4691 | 25.4498 | 25.8674 | 25.7577 | 25.2242 | 25.636  | 25.5227 | 24.9773 | 25.3834 |         | Q07812;Q07812-7 | Q07812;Q07812-7 Apoptosis regulat BAX            |
| NaN |         | NaN     | NaN     | 24.9806 | NaN     | Q9NRL2;Q9NRL2-2 | Q9NRL2;Q9NRL2-2 Bromodomain adj BAZ1A            |
|     | 24.9729 | 23.417  | 24.1244 | 25.1898 | 23.2933 | 23.8712 | NaN     | NaN     | NaN     | 22.9633 | 23.3924 | NaN     |         | Q9UIG0;Q9UIG0-7 | Q9UIG0;Q9UIG0-7 Tyrosine-protein k BAZ1B         |
|     | 22.8109 | NaN     | 23.8542 | 23.7114 | 23.5112 | NaN     | 24.7924 | 23.4347 | 24.1301 | 25.2233 | 24.0469 | NaN     |         | P50895;A0A087W  | P50895;A0A087W Basal cell adhesio BCAM           |
|     | 24.9316 | 24.3907 | 24.952  | 24.9948 | 24.7331 | 25.151  | 25.4475 | 25.5564 | NaN     | 25.2389 | 24.7261 | 24.9682 |         | Q9UHQ4-2;Q9UH   | Q9UHQ4-2;Q9UHI B-cell receptor-as BCAP29         |
|     | 29.0261 | 28.8063 | 29.1484 | 28.4861 | 28.1942 | 29.0279 | 29.1732 | 28.3109 | 27.9943 | 28.8749 | 27.9002 | 27.5396 |         | P51572-2;P51572 | P51572-2;P51572 B-cell receptor-as BCAP31        |
|     | 24.9076 | 24.7198 | 25.0194 | 24.4519 | 24.7085 | 25.149  | 26.0272 | NaN     | NaN     | 24.7216 | 25.2019 | NaN     |         | P56945;P56945-3 | P56945;P56945-3 Breast cancer anti BCAR1         |
|     | 25.3924 | 25.4631 | 25.3459 | 25.0728 | 24.9518 | 25.2812 | 26.0211 | 26.0003 | 24.4893 | 25.4707 | 25.8135 | 25.9313 |         | O75815;O75815-7 | O75815;O75815-7 Breast cancer anti BCAR3         |
|     | 26.8464 | 27.0993 | 26.9537 | 27.1647 | 26.9366 | 26.7269 | 25.8991 | NaN     | 28.2162 | 26.6674 | 27.0558 | 26.6617 |         | O75934          | O75934 Pre-mRNA-splicin BCAS2                    |
|     | 21.4981 | NaN     | Q9H6U6;Q9H6U6   | Q9H6U6;Q9H6U6 Breast carcinoma BCAS3             |
|     | 22.2797 | 23.1441 | 22.6812 | 22.3765 | 23.8819 | 22.6506 | 24.0447 | 24.0043 | 24.5107 | 22.9321 | 23.6689 | 24.6341 |         | P54687;P54687-5 | P54687;P54687-5 Branched-chain-a BCAT1           |
|     | 23.2145 | 23.4415 | 22.9153 | 22.7584 | 23.8655 | 23.0323 | NaN     | 22.6121 | 23.7475 | 22.1452 | 22.5404 | NaN     |         | O15382;B3KS13;M | O15382;B3KS13;M Bcl-2-associated t BCAT2         |
|     | 22.5398 | NaN     | Q9P287;Q9P287-7 | Q9P287;Q9P287-7 BRCA2 and CDKN BCCIP             |
|     | 26.1723 | 23.5758 | 24.4653 | 25.2487 | 23.6669 | 24.4873 | 24.4743 | 23.3606 | NaN     | 25.2244 | 24.5054 | 23.8508 |         | Q9P287-2        | Q9P287-2 BRCA2 and CDKN BCCIP                    |
|     | 23.8451 | 24.8861 | 24.8335 | 23.538  | 25.2409 | 24.2914 | 24.0668 | NaN     | NaN     | NaN     | 23.9835 | NaN     |         | O95999;A0A087W  | O95999;A0A087W Bcl-2 lymphoma/ BCL10             |
|     | 21.7818 | NaN     | 22.9246 | 22.2888 | NaN     | 22.4695 | NaN     | 23.2029 | NaN     | NaN     | NaN     | NaN     |         | Q07817;Q5QP56;f | Q07817;Q5QP56;f Bcl-2-like protein BCL2L1        |
| NaN |         | 23.1895 | 23.2809 | NaN     | 23.7841 | NaN     | NaN     | NaN     | NaN     | 24.0337 | 23.4438 | NaN     |         | A0A087WSV0;Q9I  | A0A087WSV0;Q9I Bcl-2-like protein BCL2L12        |
|     | 25.4542 | 25.6419 | 25.3258 | 25.8689 | 26.006  | 25.6377 | 24.6583 | 25.2033 | NaN     | 25.362  | 25.9714 | 25.3197 |         | Q9NYF8;Q9NYF8-7 | Q9NYF8;Q9NYF8-7 Bcl-2-associated t BCLAF1        |
|     | 24.6534 | 24.2141 | 24.2885 | 24.3183 | 24.2348 | 24.0786 | 24.0256 | NaN     | NaN     | 24.4204 | 23.9853 | NaN     |         | P11274;P11274-2 | P11274;P11274-2 Breakpoint cluste BCR            |
|     | 24.3909 | 23.9852 | 24.3272 | 24.9685 | 24.4813 | 24.8043 | NaN     | NaN     | NaN     | NaN     | NaN     | NaN     |         | Q02338;E9PCG9;f | Q02338;E9PCG9;f D-beta-hydroxybu BDH1            |
|     | 23.1163 | 23.8978 | 23.583  | 22.888  | 23.6479 | 23.8844 | NaN     | NaN     | NaN     | 24.5974 | 24.2768 | 24.5953 | NaN     | Q9BUT1;Q9BUT1-3 | Q9BUT1;Q9BUT1-3 3-hydroxybutytrat BDH2           |
|     | 24.8946 | 22.6159 | 23.2128 | 23.6109 | 22.8144 | 22.754  | NaN     | NaN     | NaN     | 23.2711 | 22.4194 | NaN     |         | Q14457;K7ELY9;E | Q14457;K7ELY9;E Beclin-1 BECN1                   |
| NaN |         | NaN     | 21.1263 | NaN     | O15155;H7C1N3;f | O15155;H7C1N3;f BET1 homolog BET1;DKFzp781C0     |
| NaN |         | NaN     | NaN     | NaN     | NaN     | NaN     |         | 21.3032 | NaN     | NaN     | NaN     | NaN     | NaN     | Q96G01;Q96G01-2 | Q96G01;Q96G01-2 Protein bicaudal C BICD1         |
|     | 25.7436 | 25.6915 | 25.1603 | 25.0639 | 25.243  | 25.1748 | 26.2298 | 25.8387 | 24.6847 | 25.4739 | 24.7822 | 24.6552 |         | Q8TD16;Q8TD16-2 | Q8TD16;Q8TD16-2 Protein bicaudal C BICD2         |
|     | 24.6742 | 24.7236 | 24.9546 | 24.8437 | 24.7323 | 25.038  | 24.4274 | NaN     | NaN     | 23.9848 | 23.1405 | NaN     |         | P55957;P55957-2 | P55957;P55957-2 BH3-interacting d BID            |
|     | 24.1391 | 24.8578 | 24.5177 | 23.9398 | 24.2795 | 24.4122 | 25.1275 | NaN     | NaN     | 24.1553 | NaN     |         | 25.1137 | O00499-10;O0045 | O00499-10;O0045 Myc box-depende BIN1             |



|     |         |         |         |         |         |         |         |         |         |         |         |         |                                                                     |                                               |
|-----|---------|---------|---------|---------|---------|---------|---------|---------|---------|---------|---------|---------|---------------------------------------------------------------------|-----------------------------------------------|
|     | 25.053  | 25.3162 | 24.9122 | 24.8174 | 25.0599 | 24.8422 | 25.9469 | 25.4549 | 24.9754 | 25.0426 | 25.1016 | 24.9788 | Q9NQY0;H7BYV6; Q9NQY0;H7BYV6; Bridging integrato BIN3               |                                               |
| NaN |         | 22.7364 | 22.842  | NaN     | NaN     |         | 25.362  | NaN     | 23.6369 | NaN     | NaN     | NaN     | O15392;A0A0B4J1 O15392;A0A0B4J1 Baculoviral IAP re  BIRC5           |                                               |
|     | 25.355  | 23.4276 | 24.4138 | 24.3431 | 23.086  | 24.0211 | NaN     | NaN     | 24.487  | 23.9634 | 23.9683 | NaN     | Q9NR09 Q9NR09 Baculoviral IAP re  BIRC6                             |                                               |
|     | 25.7146 | NaN     | P54132;HOYNU5 P54132;HOYNU5 Bloom syndrome   BLM                    |                                               |
|     | 25.3248 | 26.2503 | 25.7457 | 25.3651 | 26.2096 | 25.4632 | 25.4392 | 26.353  | 26.0034 | 25.2423 | 26.1797 | 25.9293 | Q13867;K7ES02;J1 Q13867;K7ES02;J1 Bleomycin hydrol; BLMH            |                                               |
|     | 22.2947 | 22.6863 | NaN     | Q6QNY1;J3QRU7; Q6QNY1;J3QRU7; Biogenesis of lyso BLOC152            |                                               |
| NaN | NaN     | NaN     | NaN     | NaN     | 22.877  | NaN     | Q6QNY0;K7EN58; Q6QNY0;K7EN58 Biogenesis of lyso BLOC153             |                                               |
|     | 25.8786 | 26.4339 | 26.293  | 25.6251 | 25.9965 | 26.2385 | 26.1885 | 25.3351 | 25.9611 | 25.913  | 25.376  | 25.7893 | P53004;C9J1E1 P53004 Biliverdin reducta; BLVRB                      |                                               |
|     | 27.0969 | 27.728  | 27.2722 | 27.2453 | 27.5281 | 27.6434 | 27.0763 | 27.0678 | 26.6133 | 26.914  | 27.1037 | 27.1843 | P30043;MOR192;f P30043;MOR192 Flavin reductase ( BLVRB              |                                               |
| NaN | NaN     |         | 24.0921 | NaN     | NaN     |         | 23.0283 | 24.6339 | NaN     |         | 23.2012 | NaN     | P13497;P13497-5 P13497;P13497-5 Bone morphogenet BMP1;TLL2          |                                               |
|     | 23.5195 | NaN     | 23.1769 | 23.1982 | NaN     |         | 22.9292 | NaN     | NaN     | NaN     | NaN     | NaN     | Q9NSY1;Q9NSY1- Q9NSY1;Q9NSY1- BMP-2-inducible f BMP2K               |                                               |
| NaN | NaN     | NaN     | NaN     | NaN     | NaN     | NaN     | NaN     | NaN     | NaN     | 22.0678 | NaN     | NaN     | P12644;HOYLW3 P12644;HOYLW3 Bone morphogenet BMP4                   |                                               |
|     | 22.6099 | 22.593  | 22.6259 | 22.7319 | 22.394  | NaN     | NaN     | NaN     | NaN     | 23.8663 | 22.8941 | NaN     | P36894;O00238;C P36894 Bone morphogenet BMPR1A                      |                                               |
| NaN | NaN     | NaN     | NaN     | 21.6567 | NaN     | Q13873;Q13873-2 Q13873;Q13873-2 Bone morphogenet BMPR2              |                                               |
|     | 23.1071 | NaN     | 22.8797 | 24.0098 | 22.5923 | NaN     | NaN     | NaN     | NaN     | 22.3014 | 23.0402 | NaN     | Q14692 Q14692 Ribosome biogenet BMS1                                |                                               |
| NaN | NaN     |         | 21.7512 | NaN     | Q12981;Q12981-1 Q12981;Q12981-1 Vesicle transport   BNIP1           |                                               |
|     | 25.971  | 25.5744 | 25.4625 | 25.1783 | 24.4156 | 24.6701 | NaN     | NaN     | NaN     | 24.7194 | NaN     | NaN     | Q12983;F6RP06;A Q12983;F6RP06;A BCL2/adenovirus   BNIP3             |                                               |
| NaN | NaN     | NaN     | NaN     | 22.2952 | NaN     | O60238;HOYBC7;f O60238;HOYBC7;f BCL2/adenovirus   BNIP3L            |                                               |
|     | 27.0964 | 27.6391 | 26.9626 | 26.6959 | 27.2603 | 26.9512 | 27.0473 | 26.9185 | 27.1161 | 26.5355 | 26.8954 | 27.3714 | Q9H3K6;Q9H3K6- Q9H3K6;Q9H3K6- BOLA-like protein : BOLA2;BOLA2B      |                                               |
|     | 24.1539 | 23.9993 | 24.4654 | 25.5169 | 25.1053 | 24.706  | NaN     | NaN     | 23.3119 | 24.2173 | 24.724  | 24.9523 | Q14137;Q14137-2 Q14137;Q14137-2 Ribosome biogenet BOP1              |                                               |
|     | 25.1154 | 25.8275 | 25.461  | 24.8947 | 26.0835 | 25.5858 | 25.6143 | 25.1023 | 26.1933 | 25.3815 | 25.4802 | 25.8361 | O95861;O95861-4 O95861;O95861-4 3(2),5-bisphospha BPNT1             |                                               |
|     | 24.2093 | NaN     | Q7Z569;J3KNN7;C Q7Z569;J3KNN7;C BRCA1-associated BRAP               |                                               |
|     | 23.6662 | NaN     |         | 24.1736 | 24.431  | 23.7458 | 24.1679 | 23.2011 | NaN     | NaN     | 24.2389 | 24.6572 | 24.3075                                                             | Q6PJG6;Q6PJG6-2 Q6PJG6 BRCA1-associated BRAT1 |
|     | 25.226  | 25.5606 | 25.1524 | 25.3694 | 25.6364 | 25.6788 | 25.1854 | 25.8066 | 26.0795 | 25.7002 | 25.7398 | NaN     | P46736-2;P46736 P46736-2;P46736 Lys-63-specific de BRCC3            |                                               |
|     | 23.5141 | 22.4235 | 22.7665 | 23.4514 | 22.811  | 23.0722 | 22.4868 | NaN     | 22.1758 | 23.1996 | 23.5595 | NaN     | O60885;O60885-2 O60885;O60885-2 Bromodomain-con BRD4                |                                               |
|     | 24.3955 | 23.8919 | 24.2148 | 24.3013 | 24.2492 | 24.5722 | 23.8717 | 24.4707 | 23.9085 | 24.3894 | 23.8183 | NaN     | Q9NXR7;Q9NXR7- Q9NXR7;Q9NXR7- BRCA1-A complex BRE                   |                                               |
|     | 28.2957 | 26.1474 | 27.0849 | 28.5462 | 26.5534 | 26.7511 | 24.3191 | 22.5426 | 24.6364 | 25.6352 | 25.4966 | 24.0742 | Q8TDN6 Q8TDN6 Ribosome biogenet BRX1                                |                                               |
|     | 25.7264 | 26.7244 | 26.4734 | 25.6494 | 26.7378 | 26.1977 | 26.8168 | 27.0115 | 26.9821 | 26.1954 | 27.0941 | 27.4756 | Q8WUW1;Q8WU1 Q8WUW1;Q8WU1 Protein BRICK1 BRK1                       |                                               |
| NaN | NaN     |         | 21.3483 | 22.1725 | NaN     | Q5PSV4;HOYHD0; Q5PSV4;HOYHD0; Breast cancer met BRMS1L              |                                               |
|     | 26.8208 | 26.0519 | 26.7166 | 26.4839 | 25.3271 | 26.3715 | 27.0002 | 24.6889 | 25.8167 | 26.1888 | 25.0913 | 25.7161 | Q5VW32;Q5VW3; Q5VW32;Q5VW3; BRO1 domain-con BROX                    |                                               |
| NaN | NaN     | NaN     |         | 23.0837 | NaN     | Q9ULD4;E9PI60;E Q9ULD4;E9PI60;E Bromodomain an; BRPF3               |                                               |
|     | 31.2324 | 30.0594 | 30.4679 | 30.6385 | 29.7611 | 30.3962 | 30.5315 | 29.1514 | 29.0045 | 31.1786 | 30.0849 | 29.4667 | P35613;P35613-2 P35613;P35613-2 Basigin BSG                         |                                               |
|     | 25.6386 | 24.2966 | 25.939  | 25.7547 | 25.079  | 26.4978 | 25.8565 | NaN     | 25.303  | 26.8344 | 25.6943 | 25.1762 | Q10589;Q10589- Q10589;Q10589-2 Bone marrow stro BST2                |                                               |
|     | 25.7027 | 24.2109 | 24.8545 | 25.7652 | 24.7371 | 24.9085 | NaN     | NaN     | 22.5862 | 25.1013 | 24.9474 | 24.2364 | O14981;A0A0A0N O14981;A0A0A0N TATA-binding prot BTAF1               |                                               |
|     | 23.4357 | NaN     | Q9BSF8;E9PKU9;E Q9BSF8;E9PKU9;E BTB/POZ domain- BTBD10              |                                               |
| NaN | NaN     | NaN     |         | 23.0018 | NaN     | P20290;HOY9Y1 P20290 Transcription fact; BTF3                       |                                               |
|     | 27.9836 | 28.1982 | 28.2787 | 28.2232 | 28.3484 | 28.0723 | 27.5042 | 28.9309 | 28.0309 | 28.1791 | 28.4838 | 28.7474 | P20290-2;D6RDG; P20290-2;D6RDG; Transcription fact BTF3             |                                               |
|     | 25.6969 | 25.9706 | 25.9071 | 25.7719 | 26.3077 | 25.7509 | 25.5694 | 26.4073 | 25.8181 | 25.3126 | 26.2676 | 26.412  | Q96K17;E9PL10;Q Q96K17;E9PL10 Transcription fact BTF3L4             |                                               |
|     | 27.2208 | 26.9529 | 28.2468 | 27.8642 | 27.7157 | 28.4203 | 27.0041 | 27.1663 | 26.5409 | 28.4037 | 27.7161 | 27.7981 | Q7KYR7;Q7KYR7-! Q7KYR7;Q7KYR7-! Butyrophilin subf; BTN2A1           |                                               |
| NaN |         | 23.2272 | 24.3031 | 23.7957 | 23.4522 | 24.686  | NaN     | NaN     | NaN     | 23.4326 | 23.5907 | NaN     | O00478;O00478-2 O00478;O00478-2 Butyrophilin subf; BTN3A3;BTN3A1    |                                               |
|     | 29.0883 | 28.3324 | 28.5313 | 28.6255 | 28.2952 | 28.0772 | 27.6444 | 27.7972 | 27.8485 | 29.2403 | 29.4395 | 28.2969 | O43684;J3QT28;C O43684;J3QT28;C Mitotic checkpoint BUB3             |                                               |
|     | 21.0964 | 20.8866 | 20.814  | 20.7967 | NaN     | NaN     | NaN     | NaN     | NaN     | 21.4644 | NaN     | NaN     | P41223;P41223-2 P41223;P41223-2 Protein BUD31 ho BUD31              |                                               |
|     | 25.6676 | 22.3794 | 23.8946 | 24.6264 | 22.8494 | 23.2964 | 22.3625 | 21.9908 | NaN     | 23.4459 | 22.1081 | 22.3475 | Q13895;H7BY94;f Q13895 Bystin BYSL                                  |                                               |
|     | 28.2809 | 27.3342 | 27.8241 | 28.1591 | 27.2343 | 27.8234 | 28.0048 | 27.5358 | 27.4943 | 28.0375 | 27.8272 | 27.8311 | Q7L1Q6;Q7L1Q6- Q7L1Q6;Q7L1Q6- Basic leucine zippi BZW1              |                                               |
|     | 23.6085 | 23.8386 | 23.9674 | 24.1742 | NaN     | 23.9113 | 24.0862 | NaN     | NaN     | 24.1444 | 24.1172 | 24.173  | Q9Y6E2;E7ETZ4;B Q9Y6E2;E7ETZ4;B Basic leucine zippi BZW2            |                                               |
| NaN | NaN     | NaN     | NaN     | NaN     | NaN     | NaN     | NaN     | NaN     | NaN     | NaN     | 21.9413 | NaN     | Q96B45;A0A0B4J1 Q96B45;A0A0B4J1: UPF0693 protein ( C10orf32;C10orf3 |                                               |
| NaN | NaN     | NaN     |         | 22.1575 | NaN     | Q96D05;Q96D05- Q96D05;Q96D05- Uncharacterized f C10orf35            |                                               |
|     | 23.4897 | 22.9286 | 23.665  | 23.3562 | 22.737  | 23.2908 | 24.1571 | NaN     | NaN     | 23.6439 | NaN     | NaN     | Q5T2E6;Q5T2E6-2 Q5T2E6;Q5T2E6-2 UPF0668 protein ( C10orf76          |                                               |
|     | 25.0961 | 26.7589 | 25.6901 | 24.8977 | 26.429  | 25.9919 | 25.1825 | 25.6305 | 25.6866 | 25.1988 | 25.4033 | 25.4526 | Q9H0W9;A0A087 Q9H0W9;A0A087 Ester hydrolase C: C11orf54             |                                               |
| NaN | NaN     | NaN     |         | 22.4058 | NaN     | NaN     | NaN     | NaN     | NaN     | 23.0122 | 23.5074 | NaN     | Q9H3H3;Q9H3H3 Q9H3H3;Q9H3H3 UPF0696 protein ( C11orf68              |                                               |
| NaN | NaN     | NaN     |         | 22.2215 | NaN     | NaN     | NaN     | NaN     | NaN     | NaN     | 22.9403 | NaN     | A0A0B4J220;E9PR A0A0B4J220;E9PR Uncharacterized f C11orf98          |                                               |
|     | 26.915  | 27.2756 | 26.668  | 26.6461 | 27.1561 | 26.8179 | 26.805  | 27.1768 | 26.9646 | 27.1097 | 27.5354 | 27.1293 | Q9HB07;F8VR84;f Q9HB07;F8VR84;f UPF0160 protein ( C12orf10          |                                               |
| NaN | NaN     | NaN     | NaN     | NaN     | NaN     | NaN     | 24.0815 | NaN     | NaN     | NaN     | NaN     | NaN     | Q9H741;F8VVN2 Q9H741;F8VVN2 UPF0454 protein ( C12orf49              |                                               |
|     | 23.6336 | 24.7146 | 24.0762 | 23.6668 | 24.2302 | NaN     | 24.237  | NaN     | 23.7056 | NaN     | 23.5192 | 23.816  | Q99622;U3KQ85;f Q99622;U3KQ85;f Protein C10 C12orf57                |                                               |
| NaN | NaN     | NaN     | NaN     | NaN     | NaN     | NaN     | 21.5998 | NaN     | NaN     | NaN     | NaN     | NaN     | Q9UKR5 Q9UKR5 Probable ergoster C14orf1                             |                                               |
| NaN | NaN     | NaN     |         | 22.3992 | NaN     | Q9NWX9 Q9NWX9 Uncharacterized f C14orf119                           |                                               |
| NaN | NaN     | NaN     | NaN     | NaN     | NaN     | NaN     | NaN     | NaN     | NaN     | NaN     | 20.1824 | NaN     | Q9BXV9 Q9BXV9 Uncharacterized f C14orf142                           |                                               |
|     | 26.6889 | 25.6555 | 25.4138 | 25.819  | 25.0735 | 25.3676 | 25.9295 | NaN     | NaN     | 25.9018 | 25.1694 | NaN     | Q9Y224;HOYJB9;G Q9Y224;HOYJB9;G UPF0568 protein ( C14orf166         |                                               |
|     | 24.5691 | 23.9987 | 23.6171 | 24.085  | 23.7458 | NaN     | Q6ZUT6;Q6ZUT6- Q6ZUT6;Q6ZUT6- Uncharacterized f C15orf52            |                                               |
|     | 22.0289 | NaN     | 23.8044 | 22.9977 | 22.8843 | NaN     | 24.0432 | NaN     | NaN     | 23.1604 | NaN     | NaN     | Q96S19;A0A087W Q96S19;A0A087W UPF0585 protein ( C16orf13            |                                               |



|     |         |         |         |         |         |         |         |         |         |         |         |         |     |                              |                   |                     |                |
|-----|---------|---------|---------|---------|---------|---------|---------|---------|---------|---------|---------|---------|-----|------------------------------|-------------------|---------------------|----------------|
|     | 24.5929 | 24.1352 | 23.7648 | 24.5667 | 24.2619 | 23.8377 | 23.2227 | NaN     |         | 23.8283 | 24.2691 | 24.0039 | NaN | Q9HAS0;J9JIC5;J3             | Q9HAS0;J9JIC5     | Protein Njmu-R1     | C17orf75       |
| NaN | NaN     | NaN     | NaN     | NaN     | 22.8208 | NaN     | NaN | Q53F19                       | Q53F19            | Uncharacterized p   | C17orf85       |
|     | 23.5032 | NaN     | 22.5026 | 22.8918 | NaN     | NaN     | 22.9917 | NaN     | NaN     | NaN     | 22.939  | NaN     | NaN | Q96DM3;K7ENL9;Q96DM3;K7ENL9; | Uncharacterized p | C18orf8             |                |
| NaN |         | 23.9054 | NaN     | 23.3619 | 23.6296 | 23.2846 | NaN     | NaN     | NaN     | NaN     |         | 23.6532 | NaN | Q9UFG5;E7EP72;J              | Q9UFG5;E7EP72     | UPF0449 protein     | C19orf25       |
|     | 22.492  | 23.6788 | 23.1522 | 22.6622 | 24.0067 | 23.0042 | 23.3084 | 24.8407 | NaN     | NaN     | 23.2931 | 24.1878 | NaN | Q9BQ61;K7ELS0;K              | Q9BQ61            | Uncharacterized p   | C19orf43       |
| NaN | NaN     | NaN     | NaN     | NaN     | NaN     | NaN     | 25.9046 | NaN     | NaN     | NaN     | NaN     | NaN     | NaN | Q13901;J3KP24                | Q13901;J3KP24     | Nuclear nucleic ac  | C1D            |
|     | 21.5228 | NaN     | NaN     | 21.4235 | NaN     | NaN | Q9NS00;Q9NS00-               | Q9NS00;Q9NS00-    | Glycoprotein-N-ac   | C1GALT1        |
| NaN | NaN     | NaN     | NaN     | NaN     | NaN     | NaN     | 24.4223 | NaN     | NaN     | NaN     | NaN     | NaN     | NaN | Q96EU7                       | Q96EU7            | C1GALT1-specific    | C1GALT1C1      |
|     | 23.8297 | 23.4869 | 23.2212 | 23.6823 | 23.8228 | 23.6155 | NaN     | NaN     | NaN     | NaN     | NaN     | NaN     | NaN | Q9NX04;V9GY12;v              | Q9NX04;V9GY12;v   | Uncharacterized p   | C1orf109       |
| NaN | NaN     | NaN     | NaN     | NaN     | NaN     | NaN     | NaN     | NaN     | NaN     | NaN     | NaN     | NaN     | NaN | Q6Z5J8                       | Q6Z5J8            | Uncharacterized p   | C1orf122       |
|     | 24.4956 | 25.1398 | 24.7908 | 24.6319 | 25.228  | 24.7773 | 25.0922 | 25.4311 | 25.1433 | 24.2724 | 25.0352 | 25.8712 | NaN | Q9NWW4                       | Q9NWW4            | UPF0587 protein     | C1orf123       |
| NaN | NaN     | NaN     | NaN     | NaN     | NaN     | NaN     | NaN     | 20.7937 | NaN     | NaN     | NaN     | NaN     | NaN | Q8IYL3                       | Q8IYL3            | UPF0688 protein     | C1orf174       |
| NaN | NaN     | NaN     | NaN     | 21.3482 | NaN     | NaN | Q9H425;E5RI90;Q              | Q9H425;E5RI90;Q   | Uncharacterized p   | C1orf198       |
|     | 23.4311 | 22.9273 | 23.6781 | 23.0138 | 23.4029 | 24.0196 | NaN     | NaN     | NaN     | NaN     | 24.7129 | 23.6118 | NaN | Q9H246                       | Q9H246            | Uncharacterized p   | C1orf21        |
| NaN | NaN     | NaN     | NaN     | 20.1413 | NaN     | NaN | A11170;A11170-2;             | A11170;A11170-2;  | Uncharacterized p   | C1orf226       |
| NaN | NaN     | NaN     | NaN     | NaN     | NaN     | NaN     | NaN     | NaN     | NaN     | 30.4156 | NaN     | NaN     | NaN | Q6PIY5;C9J579;C              | Q6PIY5;C9J579;C   | Uncharacterized p   | C1orf228       |
|     | 25.021  | 25.6024 | 24.4646 | 24.6481 | 24.9886 | 24.3521 | NaN     | 25.8798 | 25.8361 | 24.3765 | 25.1922 | 24.4214 | NaN | Q07021;J3L3Q7;J3             | Q07021;J3L3Q7;J3  | Complement com      | C1QB8P         |
| NaN | NaN     | NaN     | NaN     | 24.0049 | NaN     | NaN | Q9BUV8;Q9BUV8                | Q9BUV8;Q9BUV8     | Uncharacterized p   | C20orf24       |
|     | 23.7388 | 23.3074 | 23.0955 | 23.5231 | NaN     | NaN     | NaN     | NaN     | NaN     | 23.572  | NaN     | NaN     | NaN | Q9GZN8;Q9GZN8                | Q9GZN8;Q9GZN8     | UPF0687 protein     | C20orf27       |
|     | 23.3492 | 24.2665 | 23.508  | 22.9593 | 24.3759 | 23.7894 | NaN     | 23.478  | 24.1707 | 22.6814 | NaN     | 23.3358 | NaN | A0A096LP16;P300              | A0A096LP16;P300   | ES1 protein homo    | C21orf33       |
|     | 22.9514 | 23.578  | 22.9145 | 23.0194 | 22.9632 | NaN     | 23.1921 | NaN     | NaN     | 23.0609 | NaN     | NaN     | NaN | P57076;H7C2R6;C              | P57076;H7C2R6;C   | UPF0769 protein     | C21orf59       |
|     | 25.3047 | 24.304  | 24.9623 | 25.3677 | 24.5582 | 25.062  | 25.0304 | NaN     | 24.3305 | 25.2261 | 25.3356 | 24.5804 | NaN | Q86Y57;Q86Y57-3              | Q86Y57;Q86Y57-3   | C2 domain-contai    | C2CD5          |
| NaN | NaN     | NaN     | NaN     | NaN     | NaN     | NaN     | NaN     | NaN     | NaN     | NaN     | NaN     | 20.6895 | NaN | Q8WWC4                       | Q8WWC4            | Uncharacterized p   | C2orf47        |
| NaN |         | 22.5069 | 22.9013 | NaN     | 22.22   | NaN     | NaN     | NaN     | NaN     | 22.8697 | NaN     | NaN     | NaN | A6NCS6                       | A6NCS6            | Uncharacterized p   | C2orf72        |
| NaN |         | 22.0276 | NaN     | 22.0539 | 21.9591 | NaN     | NaN | P01024;M0QXZ3                | P01024            | Complement C3;C     | C3             |
| NaN | NaN     | NaN     | NaN     | 20.499  | NaN     | NaN | Q9NWW4                       | Q9NWW4            | UPF0609 protein     | C4orf27        |
| NaN | NaN     | NaN     | NaN     | 21.6432 | NaN     | NaN | A6NDU8;A0A0C4I               | A6NDU8;A0A0C4I    | UPF0600 protein     | C5orf51        |
| NaN | NaN     | NaN     | NaN     | 22.3078 | NaN     | NaN | Q7Z4R8                       | Q7Z4R8            | UPF0669 protein     | C6orf120       |
|     | 23.3508 | NaN     | NaN     | 22.9456 | NaN     | NaN | Q9BRJ6;C9JQV0;H              | Q9BRJ6;C9JQV0;H   | Uncharacterized p   | C7orf50        |
|     | 23.6607 | 23.3604 | 23.1561 | 23.9077 | 23.6299 | 23.0299 | NaN     | NaN     | NaN     | 22.9899 | NaN     | NaN     | NaN | Q9H7E9;Q9H7E9-               | Q9H7E9;Q9H7E9-    | UPF0488 protein     | C8orf33        |
|     | 23.9464 | 22.9346 | 23.3585 | 24.2674 | 23.1141 | 23.2334 | NaN     | NaN     | NaN     | 22.6458 | NaN     | 22.6387 | NaN | Q5T280;A0A087V               | Q5T280;A0A087V    | Putative methyltr   | C9orf114       |
| NaN | NaN     | NaN     | 23.1399 | 22.7611 | NaN     | NaN | Q9BUH6                       | Q9BUH6            | Protein PAXX        | C9orf142       |
|     | 24.2434 | 25.1207 | 24.4923 | 23.9514 | 25.2288 | 24.6955 | 25.2792 | 25.0503 | 25.0325 | 24.5015 | 24.9601 | 25.5528 | NaN | Q5T6V5;Q5T6V7;J              | Q5T6V5            | UPF0553 protein     | C9orf64        |
|     | 21.6889 | NaN     | NaN | Q96LT7                       | Q96LT7            | Protein C9orf72     | C9orf72        |
| NaN | NaN     | NaN     | NaN     | 20.2162 | NaN     | NaN | Q9H8G2                       | Q9H8G2            | Caspase activity    | CAAP1          |
|     | 26.029  | 25.9088 | 26.0596 | 25.9391 | 25.3838 | 25.8954 | 26.0374 | NaN     | NaN     | 26.1006 | 25.614  | NaN     | NaN | Q9Y376;A0A087X               | Q9Y376;A0A087X    | Calcium-binding p   | CAB39          |
|     | 22.8791 | 24.1988 | 24.0256 | 23.6545 | 23.636  | 24.4803 | 24.1481 | NaN     | 24.2749 | 24.0106 | 23.4297 | 24.3102 | NaN | P54289;P54289-4;             | P54289;P54289-4;  | Voltage-depende     | CACNA2D1       |
|     | 22.2187 | NaN     | NaN | Q86Y37;Q86Y37-2              | Q86Y37;Q86Y37-2   | CDK2-associated     | CACUL1         |
|     | 29.6755 | 29.2384 | 29.2498 | 29.6052 | 29.4474 | 29.089  | 29.2236 | 29.0493 | 28.624  | 29.4893 | 29.1977 | 28.8838 | NaN | Q9HB71;Q9HB71-               | Q9HB71;Q9HB71-    | Calcyclin-binding   | JACACYBP       |
|     | 31.2707 | 30.0835 | 30.6054 | 31.3652 | 30.4788 | 30.6327 | 30.4116 | 30.9334 | 30.4269 | 31.0373 | 30.9003 | 30.6114 | NaN | P27708;F8VPD4;H              | P27708;F8VPD4     | CAD protein;Glut    | CAD            |
| NaN | NaN     | NaN     | NaN     | NaN     | NaN     | NaN     | NaN     | NaN     | NaN     | NaN     | NaN     | 24.2619 | NaN | Q86UW7;Q86UW                 | Q86UW7;Q86UW      | Calcium-depende     | CADPS2         |
| NaN |         | 22.9695 | 22.117  | NaN     | NaN     | NaN     | NaN     | NaN     | NaN     | 22.6106 | 22.7449 | 23.0761 | NaN | P22676;H3BN14                | P22676;H3BN14     | Calretinin          | CALB2          |
|     | 25.7388 | 24.749  | 26.0967 | 24.1919 | 23.6747 | 24.4321 | 25.7671 | 25.5462 | 24.5616 | 23.5284 | NaN     | 23.7227 | NaN | Q9P1Z2;Q9P1Z2-               | Q9P1Z2;Q9P1Z2-2   | Calcium-binding a   | CALCOCO1       |
|     | 28.5852 | 26.2467 | 27.3268 | 26.1382 | 24.5277 | 25.9061 | 26.8872 | 23.2847 | 23.202  | 25.6188 | 24.5178 | NaN     | NaN | Q13137-4;Q13137              | Q13137-4;Q13137   | Calcium-binding a   | CALCOCO2       |
|     | 27.1987 | 27.5716 | 27.1504 | 26.8121 | 26.8992 | 27.0358 | 27.1386 | 25.0535 | 25.6794 | 26.3132 | 26.5615 | 26.3949 | NaN | Q05682-4;E9PGZ1              | Q05682-4;E9PGZ1   | Caldesmon           | CALD1          |
|     | 25.4992 | 25.2335 | 24.7895 | 24.0259 | NaN     | 24.2231 | 24.6092 | NaN     | NaN     | 25.1807 | NaN     | NaN     | NaN | P62158;HOY7A7;F              | P62158;HOY7A7;F   | Calmodulin          | CALM1;CALM2;CA |
|     | 30.8882 | 30.5504 | 30.9579 | 30.6816 | 30.5182 | 31.0307 | 31.5023 | 31.9725 | 32.0363 | 31.339  | 31.1219 | 31.0214 | NaN | P27797;K7E1B9;K              | P27797;K7E1B9     | Calreticulin        | CALR           |
|     | 27.9328 | 28.705  | 28.2297 | 27.9821 | 28.3792 | 28.0798 | 29.4118 | 29.3231 | 29.1962 | 28.6839 | 28.385  | 28.1482 | NaN | O43852;O43852-5              | O43852;O43852-5   | Calumenin           | CALU           |
|     | 22.8785 | 23.5748 | NaN     | 22.592  | NaN     | 22.3695 | 23.7532 | 23.7093 | NaN     | 22.7151 | 22.9418 | NaN     | NaN | O43852-4;O43852              | O43852-4;O43852   | Calumenin           | CALU           |
|     | 23.0644 | NaN     | 22.8297 | 23.1921 | 22.1972 | 22.823  | 23.8526 | NaN     | 22.6124 | 23.8562 | 23.2637 | 22.6858 | NaN | Q14012;C9JES6;H              | Q14012;C9JES6     | Calcium/calmodul    | CAMK1          |
|     | 27.2614 | 26.9889 | 27.021  | 27.2197 | 27.4097 | 27.1552 | 26.6409 | 27.2665 | 27.0592 | 27.0522 | 26.9024 | 27.0544 | NaN | Q13557;Q13557-4              | Q13557;Q13557-4   | Calcium/calmodul    | CAMK2D         |
|     | 26.0069 | 25.8449 | 25.7115 | 25.9007 | 26.115  | 25.9422 | 24.9977 | 25.4132 | 25.677  | 25.2929 | 25.5562 | 24.7087 | NaN | Q13555;Q13555-4              | Q13555;Q13555-4   | Calcium/calmodul    | CAMK2G;CAMK2B  |
| NaN | NaN     | NaN     | NaN     | 21.2435 | NaN     | NaN | Q96RR4;Q96RR4-               | Q96RR4;Q96RR4-    | Calcium/calmodul    | CAMKK2         |
|     | 28.0656 | 27.4573 | 27.9719 | 27.5923 | 27.4845 | 27.9785 | 28.5466 | 28.0571 | 28.2763 | 28.6817 | 28.1675 | 28.259  | NaN | Q86VP6;Q86VP6-               | Q86VP6;Q86VP6-    | Cullin-associated   | CAND1          |
|     | 30.4343 | 29.8322 | 30.2175 | 30.4158 | 29.8749 | 30.3015 | 30.0282 | 29.9414 | 30.4144 | 30.0341 | 29.3873 | 29.6989 | NaN | P27824;P27824-2              | P27824;P27824-2   | Calnexin            | CANX           |
|     | 30.4043 | 31.116  | 30.67   | 30.1693 | 30.5998 | 30.5522 | 31.3557 | 30.8382 | 30.5969 | 31.0688 | 30.7607 | 30.7397 | NaN | Q01518;Q01518-2              | Q01518;Q01518-2   | Adenylyl cyclase-2  | CAP1           |
|     | 26.1804 | 26.6921 | 26.496  | 26.0683 | 26.3114 | 26.4806 | 26.8572 | 26.6479 | NaN     | 26.8657 | 26.7505 | 26.6688 | NaN | P40123;E9PD12;A              | P40123;E9PD12;A   | Adenylyl cyclase-2  | CAP2           |
|     | 29.1433 | 29.1593 | 29.1913 | 28.7452 | 28.7967 | 29.0045 | 30.1084 | 28.5123 | 28.979  | 29.6667 | 29.1033 | 29.1696 | NaN | P40121;P40121-2              | P40121;P40121-2   | Macrophage-capp     | CAPG           |
|     | 27.7135 | 27.753  | 27.8351 | 27.5249 | 27.7067 | 27.957  | 28.3225 | 27.9981 | 27.861  | 28.2425 | 27.9487 | 28.0529 | NaN | P07384;E9PRM1;I              | P07384            | Calpain-1 catalytic | CAPN1          |
|     | 29.2831 | 28.728  | 29.2862 | 29.249  | 28.5797 | 29.0498 | 29.9014 | 29.7479 | 29.5623 | 30.0839 | 29.8553 | 29.778  | NaN | P17655;P17655-2              | P17655;P17655-2   | Calpain-2 catalytic | CAPN2          |



|     |         |         |         |         |         |         |         |         |         |         |         |         |                  |                  |                     |               |
|-----|---------|---------|---------|---------|---------|---------|---------|---------|---------|---------|---------|---------|------------------|------------------|---------------------|---------------|
|     | 25.8357 | 26.2598 | 26.9602 | 26.3569 | 26.4053 | 26.9507 | 26.957  | 26.5318 | 27.7081 | 27.3835 | 26.7987 | 27.6214 | O15484;A0A087Xi  | O15484;A0A087Xi  | Calpain-5           | CAPN5         |
|     | 23.8449 | 23.1725 | 23.3316 | 23.3048 | 23.0059 | 23.0014 | 25.4979 | NaN     | 25.6362 | 24.7199 | 24.2695 | 24.0047 | Q9Y6W3;H7C1B7;   | Q9Y6W3           | Calpain-7           | CAPN7         |
|     | 27.9942 | 27.6917 | 26.9196 | 27.6459 | 27.4413 | 25.8666 | 27.7262 | 27.607  | 27.5889 | 27.5728 | 27.4718 | 27.579  | P04632;A0A0C4D   | P04632;A0A0C4D   | Calpain small sub   | CAPN51        |
|     | 28.6587 | 28.5298 | 28.5413 | 28.3399 | 28.1739 | 28.1917 | 27.6536 | 28.0654 | 27.1117 | 27.5064 | 27.9533 | 27.4533 | Q14444;Q14444-1  | Q14444;Q14444-2  | Caprin-1            | CAPRIN1       |
|     | 28.9591 | 30.0652 | 29.448  | 28.8332 | 29.8236 | 29.4052 | 29.8147 | 30.1545 | 29.8305 | 29.4739 | 29.5024 | 29.8975 | P52907           | P52907           | F-actin-capping pr  | CAPZA1        |
|     | 24.7663 | 25.9626 | 25.4424 | 24.8267 | 25.6137 | 25.5353 | 25.8275 | 25.9738 | 25.5803 | 25.382  | 25.6384 | 25.5086 | P47755;F8W9N7;f  | P47755           | F-actin-capping pr  | CAPZA2        |
|     | 28.4315 | 29.354  | 29.0807 | 28.3662 | 29.1526 | 29.1076 | 29.3849 | 29.4884 | 29.2042 | 29.3589 | 29.3342 | 29.5456 | P47756-2;B1AK87  | P47756-2;B1AK87  | F-actin-capping pr  | CAPZB         |
|     | 22.2216 | 22.3917 | NaN     | 21.5002 | NaN     | Q9Y2G2;Q9Y2G2-   | Q9Y2G2;Q9Y2G2-   | Caspase recruitm    | CARD8         |
|     | 26.0062 | 26.5949 | 26.1298 | 25.8079 | 26.2408 | 26.1117 | 25.9692 | 26.5003 | 26.3961 | 25.1541 | 25.6717 | 26.4376 | Q9Y2V2;H3B5W7;   | Q9Y2V2;H3B5W7;   | Calcium-regulatec   | CARHSP1       |
|     | 26.4506 | 26.0083 | 26.2225 | 26.3512 | 26.037  | 26.1762 | 26.1197 | 26.5235 | 26.3812 | 26.7046 | 26.7797 | 26.9076 | Q86X55;Q86X55-   | Q86X55;Q86X55-1  | Histone-arginine r  | CARM1         |
|     | 26.4098 | 27.0006 | 26.7253 | 26.1463 | 26.8693 | 26.934  | 26.4466 | 26.6123 | 26.7095 | 26.4002 | 26.2039 | 26.1776 | P49589-3;P49589  | P49589-3;P49589; | Cysteine--trNA lig  | CARS          |
|     | 23.3489 | 22.8868 | 22.6363 | 23.1686 | NaN     | NaN     | 23.9518 | NaN     | NaN     | NaN     | NaN     | NaN     | Q6P4E1;Q6P4E1-1  | Q6P4E1;Q6P4E1-2  | Protein CASC4       | CASC4         |
|     | 26.6075 | 26.704  | 27.686  | 26.7593 | 26.9351 | 27.7218 | 27.5452 | 26.6726 | 27.0714 | 28.073  | 27.1576 | 27.0904 | O14936;O14936-1  | O14936;O14936-3  | Peripheral plasma   | CASK          |
| NaN |         | 22.9154 | 23.4363 | NaN     | NaN     | NaN     | 23.1692 | NaN     | NaN     | 22.7264 | 23.3388 | NaN     | Q8WXE0;Q8WXEC    | Q8WXE0;Q8WXEC    | Caskin-2            | CASKIN2       |
|     | 25.3172 | 25.7772 | 25.8378 | 25.5789 | 25.5906 | 25.7395 | 25.583  | 24.8316 | 25.2027 | 25.5607 | 25.2517 | 25.5003 | P42574;A8MVM1    | P42574;A8MVM1    | Caspase-3;Caspas    | CASP3         |
|     | 26.1658 | 24.6915 | 25.5471 | 25.7662 | 25.7059 | 25.5246 | 24.0327 | 24.7936 | NaN     | 24.0523 | 24.8088 | NaN     | P49662;A0A087W   | P49662;A0A087W   | Caspase-4;Caspas    | CASP4         |
|     | 23.5447 | 24.4624 | 23.6669 | 23.4712 | 23.7672 | NaN     | 24.1875 | NaN     | NaN     | 24.3655 | 24.0576 | NaN     | P55210;A0A0A0N   | P55210;A0A0A0M   | Caspase-7;Caspas    | CASP7         |
|     | 26.6349 | 24.926  | 25.3062 | 26.5439 | 24.8601 | 25.2001 | 25.2924 | NaN     | NaN     | 25.5232 | 25.225  | NaN     | Q14790;Q14790-1  | Q14790;Q14790-4  | Caspase-8;Caspas    | CASP8         |
|     | 26.5841 | 27.2457 | 26.9024 | 25.939  | 27.3748 | 26.6894 | 27.2656 | 27.8389 | 27.2302 | 27.0197 | 27.3179 | 27.941  | P20810-5;P20810  | P20810-5;P20810  | Calpastatin         | CAST          |
|     | 26.5041 | 27.7856 | 27.5882 | 26.8604 | 27.6815 | 27.6663 | 27.1687 | 27.9389 | 27.9067 | 27.0049 | 27.1765 | 27.415  | P04040           | P04040           | Catalase            | CAT           |
|     | 30.2545 | 29.3255 | 30.2437 | 30.8198 | 29.5224 | 30.5017 | 29.78   | 28.674  | 28.5382 | 30.038  | 29.3215 | 28.9054 | Q03135;E9PCT5;P  | Q03135;E9PCT5    | Caveolin-1;Caveol   | CAV1          |
|     | 26.1384 | NaN     | 26.4534 | 27.4172 | 26.0794 | 26.9255 | 26.3072 | NaN     | 26.2133 | 26.9882 | 26.421  | NaN     | Q03135-2;C9JKI3  | Q03135-2;C9JKI3  | Caveolin-1;Caveol   | CAV1          |
|     | 23.965  | NaN     | NaN     | NaN     | 23.2724 | NaN     | P51636;E9PCT3;P  | P51636;E9PCT3;P  | Caveolin-2;Caveol   | CAV2          |
|     | 25.329  | 25.0542 | 25.3338 | 24.9435 | 24.8497 | 25.1301 | 25.6684 | 25.9903 | 25.5756 | 26.1613 | 25.6757 | 25.9237 | Q13951-2;Q13951  | Q13951-2;Q13951  | Core-binding factr  | CBBF          |
|     | 24.489  | 23.6406 | 24.0402 | 24.7289 | 23.573  | 23.1007 | NaN     | NaN     | NaN     | 23.4068 | NaN     | 23.066  | P22681;A0A0U1R   | P22681;A0A0U1R   | E3 ubiquitin-prote  | CBL           |
|     | 28.0343 | 28.2185 | 27.8224 | 27.7407 | 28.0486 | 27.9015 | 28.2561 | 27.7808 | 27.6307 | 28.2378 | 28.2346 | 28.0426 | P16152;E9PQ63;A  | P16152;E9PQ63;A  | Carbonyl reductas   | CBR1          |
|     | 25.4377 | 26.277  | 25.8054 | 25.2638 | 26.3163 | 26.0493 | 25.8218 | 25.5737 | 26.0791 | 25.5317 | 25.9527 | 26.5437 | O75828           | O75828           | Carbonyl reductas   | CBR3          |
|     | 21.0683 | NaN     | Q9BRT8;Q8IUF1;C  | Q9BRT8;Q8IUF1;C  | COBW domain-co      | CBWD1;CBWD2;C |
|     | 23.2485 | 23.297  | 23.2935 | 23.2249 | 23.8698 | NaN     | NaN     | NaN     | NaN     | 24.104  | 24.233  | 23.877  | P83916;B5MD17;   | P83916;B5MD17;   | Chromobox prote     | CBX1          |
|     | 26.3889 | 26.3197 | 26.2517 | 26.5382 | 26.0224 | 26.4116 | 26.559  | 25.8976 | 25.3427 | 27.0906 | 26.712  | 27.0648 | Q13185;B8ZZ43;C  | Q13185           | Chromobox prote     | CBX3          |
|     | 23.9416 | NaN     | NaN     | 22.8691 | NaN     | NaN     | 23.2893 | NaN     | NaN     | 23.5945 | 24.3191 | NaN     | P45973;F8VNY3    | P45973           | Chromobox prote     | CBX5          |
|     | 25.2901 | 24.9058 | 25.3544 | 25.0269 | 24.9299 | 25.4091 | 24.5251 | 25.1027 | 24.8629 | 24.3833 | 24.1787 | 25.0309 | Q6P1N0;Q6P1N0-   | Q6P1N0;Q6P1N0-   | Coiled-coil and C2  | CC2D1A        |
|     | 22.984  | 23.5013 | 23.0656 | 22.9164 | 23.6971 | NaN     | NaN     | NaN     | 24.0843 | 23.8334 | 23.6271 | 24.0771 | H7C1U3;Q5TOF9-1  | H7C1U3;Q5TOF9-2  | Coiled-coil and C2  | CC2D1B        |
|     | 27.2879 | 25.6264 | 26.6342 | 27.1519 | 26.5743 | 26.7909 | 24.5078 | 24.8826 | 22.913  | 26.4955 | 26.5929 | 25.5572 | Q8IX12;Q8IX12-2; | Q8IX12;Q8IX12-2; | Cell division cycle | CCAR1         |
|     | 27.095  | 26.3049 | 26.6995 | 26.8311 | 26.5341 | 26.7981 | 25.4816 | 26.0644 | 25.8391 | 26.8917 | 27.0022 | 26.8557 | Q8N163;Q8N163-   | Q8N163;Q8N163-   | Cell cycle and cyc  | CCAR2         |
|     | 21.0092 | 21.3194 | 21.1718 | NaN     | 21.3269 | NaN     | Q16773;B7Z4W5;f  | Q16773;B7Z4W5;f  | Kynurenine--oxog    | CCBL1         |
|     | 26.1078 | 26.1313 | 25.4289 | 25.5301 | 26.0791 | 25.3878 | 25.9424 | 25.6731 | 26.0762 | 26.018  | 26.0728 | 26.068  | Q6YP21-3;Q6YP21  | Q6YP21-3;Q6YP21  | Kynurenine--oxog    | CCBL2         |
|     | 25.8527 | 27.1403 | 26.5116 | 25.0659 | 27.0102 | 25.4442 | 26.2621 | 26.8321 | 26.3136 | 25.1595 | 25.8236 | 25.9453 | Q96CT7;MOR2F5    | Q96CT7;MOR2F5    | Coiled-coil domain  | CCDC124       |
|     | 23.4373 | NaN     | 22.5193 | 23.0094 | 21.6708 | NaN     | NaN     | NaN     | NaN     | 23.2549 | NaN     | NaN     | Q96JG6;Q96JG6-1  | Q96JG6;Q96JG6-3  | Coiled-coil domain  | CCDC132       |
| NaN |         | 24.323  | NaN     | NaN     | 24.4778 | NaN     | Q8IYT3           | Q8IYT3           | Coiled-coil domain  | CCDC170       |
|     | 23.7445 | 23.5505 | 23.6154 | 23.5024 | 23.8375 | 23.8121 | NaN     | NaN     | NaN     | 24.0159 | 23.9733 | NaN     | O60826           | O60826           | Coiled-coil domain  | CCDC22        |
|     | 22.673  | 23.9883 | 23.532  | 22.6854 | 23.9056 | 23.6744 | 22.9354 | NaN     | NaN     | 23.2523 | 23.5091 | 23.6174 | Q86WR0;Q86WR(C   | Q86WR0;Q86WR(C   | Coiled-coil domain  | CCDC25        |
|     | 25.9657 | 25.2046 | 25.6761 | 26.0782 | 25.2318 | 25.7353 | 25.1609 | NaN     | 25.7442 | 25.4782 | 25.5838 | 24.3436 | Q96A33;Q96A33-   | Q96A33;Q96A33-   | Coiled-coil domain  | CCDC47        |
|     | 25.5873 | 26.6598 | 26.3641 | 25.2917 | 26.434  | 26.212  | 25.6016 | NaN     | 25.1045 | 25.2227 | 24.706  | NaN     | Q8IVM0;Q8IVM0-   | Q8IVM0;Q8IVM0-   | Coiled-coil domain  | CCDC50        |
|     | 22.345  | 22.525  | 22.7794 | 22.4665 | 22.5077 | NaN     | NaN     | NaN     | NaN     | 22.1459 | NaN     | NaN     | Q9Y3C0;F5GW19;f  | Q9Y3C0;F5GW19;f  | WASH complex su     | CCDC53        |
|     | 23.1947 | 23.927  | 22.8303 | 23.3133 | 23.2375 | NaN     | NaN     | NaN     | 23.4836 | 23.2648 | 23.111  | 23.303  | Q4VC31;C9JQ41;f  | Q4VC31;C9JQ41;f  | Coiled-coil domain  | CCDC58        |
|     | 23.4308 | NaN     | 22.8966 | 23.3156 | 22.9559 | NaN     | NaN     | NaN     | NaN     | 23.4361 | 23.0266 | NaN     | Q9P031;F8VNY5    | Q9P031;F8VNY5    | Thyroid transcript  | CCDC59        |
|     | 26.5802 | 27.1373 | 26.7402 | 26.5298 | 26.9714 | 26.6955 | 27.1104 | 27.7676 | 26.7004 | 26.4756 | 26.7801 | 26.9076 | Q16204           | Q16204           | Coiled-coil domain  | CCDC6         |
|     | 22.5744 | NaN     | 23.4059 | 24.613  | 23.686  | 23.9633 | A6N179;H0YBY5    | A6N179           | Coiled-coil domain  | CCDC69        |
| NaN |         | NaN     | 20.9449 | NaN     | NaN     | Q9H0W5           | Q9H0W5           | Coiled-coil domain  | CCDC8         |
| NaN |         | NaN     | NaN     | NaN     | NaN     | NaN     | 22.1983 | NaN     | NaN     | NaN     | NaN     | NaN     | Q76M96;Q76M96    | Q76M96;Q76M96    | Coiled-coil domain  | CCDC80        |
|     | 22.4085 | NaN     | 22.3499 | 22.0872 | NaN     | Q9HF65;H0YGY79;f | Q9HF65           | Coiled-coil domain  | CCDC86        |
|     | 24.5557 | 25.173  | 25.2422 | 24.535  | 25.1332 | 24.734  | 25.2372 | 24.2575 | NaN     | 24.7192 | 24.3336 | 24.7257 | Q3V6T2;Q3V6T2-   | Q3V6T2;Q3V6T2-   | Girdin              | CCDC88A       |
| NaN |         | NaN     | 24.1986 | NaN     | Q9P219           | Q9P219           | Protein Daple       | CCDC88C       |
| NaN |         | NaN     | NaN     | NaN     | NaN     | NaN     | 24.9032 | NaN     | NaN     | NaN     | NaN     | NaN     | E9PKQ5           | E9PKQ5           |                     | CCDC90B       |
|     | 23.4491 | NaN     | 23.3664 | 23.2199 | NaN     | NaN     | NaN     | NaN     | NaN     | 23.3348 | 23.3914 | NaN     | Q567U6;F8W9X7;   | Q567U6;F8W9X7    | Coiled-coil domain  | CCDC93        |
| NaN |         | NaN     | NaN     | 20.4059 | NaN     | Q96F63           | Q96F63           | Coiled-coil domain  | CCDC97        |
| NaN |         | NaN     | 20.6906 | NaN     | Q9BSQ5;Q9BSQ5-   | Q9BSQ5;Q9BSQ5-   | Cerebral cavernot   | CCM2          |
|     | 25.0411 | 25.1261 | 25.3044 | 24.856  | 25.602  | 25.2577 | 24.8941 | 24.9074 | 25.6076 | 25.3121 | 25.3452 | 25.3993 | P14635;E9PC90;P  | P14635;E9PC90;P  | G2/mitotic-specifi  | CCNB1         |
| NaN |         | NaN     | 22.7495 | NaN     | NaN     | O95067;H1UBN3;   | O95067;H1UBN3;   | G2/mitotic-specifi  | CCNB2;CCNB2V  |



|     |         |     |         |     |         |         |         |         |         |         |         |        |         |         |         |         |         |         |         |         |         |         |                 |                  |                                   |                     |                     |         |       |
|-----|---------|-----|---------|-----|---------|---------|---------|---------|---------|---------|---------|--------|---------|---------|---------|---------|---------|---------|---------|---------|---------|---------|-----------------|------------------|-----------------------------------|---------------------|---------------------|---------|-------|
| NaN | NaN     |     | 21.2355 |     | 21.1333 | NaN     |         | NaN     |         | NaN     |         | NaN    |         | NaN     |         | NaN     |         | NaN     |         | NaN     |         | NaN     |                 | O95273;O95273-3  | O95273;O95273-2 Cyclin-D1-binding | CCNDBP1             |                     |         |       |
|     | 22.9214 | NaN |         | NaN | 23.3589 | NaN     |         | 22.8741 | NaN     |         | NaN     |        | NaN     |         | 22.7735 |         | 23.0348 | NaN     |         |         |         |         |                 | Q9UK58;C9JPLO;C  | Q9UK58;C9JPLO;Q Cyclin-L1         | CNC1L               |                     |         |       |
|     | 21.6129 | NaN |         | NaN |         |         |         |         |         |         |         |        |         |         | 22.1726 |         | 22.107  | NaN     |         |         |         |         |                 | O60563;O60563-3  | O60563;O60563-2 Cyclin-T1         | CNC1T               |                     |         |       |
|     | 24.3216 |     | 24.8233 |     | 25.4706 |         | 24.742  |         | 25.051  |         | 25.7862 |        | 24.2517 |         | 23.6873 | NaN     |         | 25.3017 |         | 24.9715 |         | 24.8389 |                 | Q8ND76;Q8ND76    | Q8ND76;Q8ND76                     | Cyclin-Y            | CCNY                |         |       |
|     | 25.0149 |     | 24.6798 |     | 25.3415 |         | 24.9323 |         | 24.9908 |         | 25.6121 |        | 24.7204 | NaN     |         | NaN     |         | 25.7589 |         | 24.8735 |         | 25.0162 |                 | Q8N7R7;Q8N7R7    | Q8N7R7;Q8N7R7                     | Cyclin-Y-like prote | CCNVY1              |         |       |
|     | 22.8032 | NaN |         | NaN |         | 21.8538 | NaN     |         | NaN     |         | NaN     |        | NaN     |         | NaN     |         | 22.3336 | NaN     |         | NaN     |         |         |                 | Q9ULG6;Q9ULG6    | Q9ULG6;Q9ULG6                     | Cell cycle progres  | CCPG1               |         |       |
|     | 24.9849 |     | 25.4482 |     | 26.4961 |         | 25.733  |         | 26.1173 |         | 26.759  |        | 25.5501 | NaN     |         | NaN     |         | 26.6415 |         | 25.8498 | NaN     |         |                 | O00421;O00421-3  | O00421;O00421-2 C-C chemokine re  | CCRL2               |                     |         |       |
|     | 23.5271 |     | 24.4544 |     | 24.293  |         | 23.7325 |         | 24.5855 | NaN     |         | 24.743 |         | 24.6363 |         | 24.4606 |         | 24.5396 |         | 24.545  |         | 24.9885 |                 | O14618;J3KNF4;E  | O14618;J3KNF4;E                   | Copper chaperon     | CCS                 |         |       |
|     | 32.5599 |     | 32.5009 |     | 32.3835 |         | 32.5788 |         | 32.6761 |         | 32.4589 |        | 32.3591 |         | 32.826  |         | 32.2804 |         | 32.518  |         | 32.6768 |         | 32.5274         |                  | P78371;P78371-2                   | P78371;P78371-2     | T-complex protein   | CCT2    |       |
|     | 32.8075 |     | 32.4915 |     | 32.4635 |         | 32.8342 |         | 32.8503 |         | 32.6197 |        | 32.4132 |         | 32.8991 |         | 32.5202 |         | 32.6869 |         | 32.7367 |         | 32.658          |                  | P49368;P49368-2                   | P49368;P49368-2     | T-complex protein   | CCT3    |       |
|     | 32.1534 |     | 31.8323 |     | 31.7809 |         | 32.1633 |         | 32.2105 |         | 31.8602 |        | 31.7287 |         | 32.22   |         | 31.6699 |         | 31.9113 |         | 32.0097 |         | 31.9969         |                  | P50991;P50991-2                   | P50991;P50991-2     | T-complex protein   | CCT4    |       |
|     | 31.9753 |     | 31.9155 |     | 31.7425 |         | 32.073  |         | 32.0801 |         | 31.9655 |        | 31.8361 |         | 32.25   |         | 31.6842 |         | 32.1129 |         | 32.0838 |         | 32.1182         |                  | P48643;B7ZAR1;E                   | P48643;B7ZAR1;E     | T-complex protein   | CCT5    |       |
|     | 31.7393 |     | 31.8687 |     | 31.6841 |         | 31.9564 |         | 32.1213 |         | 31.773  |        | 31.7019 |         | 32.3011 |         | 31.7521 |         | 31.9362 |         | 32.0433 |         | 31.8122         |                  | P40227;P40227-2                   | P40227;P40227-2     | T-complex protein   | CCT6A   |       |
| NaN |         | NaN |         | NaN |         | NaN     |         | NaN     |         | NaN     |         | 26.185 | NaN     |         |                 |                  | Q92526;Q92526-3                   | Q92526;Q92526-2     | T-complex protein   | CCT6B   |       |
|     | 31.6269 |     | 31.5044 |     | 31.5155 |         | 31.7893 |         | 31.8887 |         | 31.7725 |        | 31.1475 |         | 31.7439 |         | 31.4248 |         | 31.6761 |         | 32.0002 |         | 31.7916         |                  | Q99832;Q99832-2                   | Q99832;Q99832-1     | T-complex protein   | CCT7    |       |
|     | 32.3506 |     | 31.7904 |     | 31.8603 |         | 32.3137 |         | 32.1421 |         | 32.0322 |        | 31.7991 |         | 32.3416 |         | 31.7635 |         | 32.0954 |         | 32.1007 |         | 32.042          |                  | P50990;P50990-2                   | P50990;P50990-2     | T-complex protein   | CCT8    |       |
|     | 24.6042 |     | 25.1633 |     | 24.2874 |         | 24.5735 |         | 24.6342 |         | 24.4209 |        | 24.5614 | NaN     |         | NaN     |         | 23.9271 |         | 24.5808 | NaN     |         |                 | P86791;P86790;F  | P86791;P86790                     | Vacuolar fusion pr  | CCZ1;CCZ1B          |         |       |
|     | 26.7768 |     | 26.9562 |     | 25.4274 |         | 26.4268 |         | 26.256  |         | 25.15   | NaN    |         | NaN     |         | NaN     |         | NaN     |         | NaN     |         |         |                 | P48509;E9PMR4;i  | P48509;E9PMR4;E                   | CD151 antigen;Te    | CD151               |         |       |
|     | 22.5346 | NaN |         | NaN |         | 22.8626 | NaN     |         | NaN     |         | NaN     |        | NaN     |         | 22.8797 |         | 23.7095 |         | 23.0034 |         | 23.3169 |         | P20273;P20273-5 | P20273;P20273-5  | B-cell receptor                   | CD                  | CD22                |         |       |
|     | 26.4314 |     | 26.0651 |     | 26.065  |         | 26.3115 |         | 26.2344 |         | 26.4824 |        | 26.3767 |         | 26.3729 |         | 26.3909 |         | 25.9566 |         | 25.7582 |         | 26.4141         |                  | Q9NZQ7;Q9NZQ7                     | Q9NZQ7;Q9NZQ7       | Programmed cell     | CD      | CD74  |
|     | 26.601  |     | 26.3405 |     | 27.2704 |         | 27.0593 |         | 26.1863 |         | 27.3256 |        | 27.0124 | NaN     |         | 25.2038 |         | 27.7084 |         | 26.8969 |         | 26.4429 |                 | Q5ZPR3;AOA0C4D   | Q5ZPR3;AOA0C4D                    | CD276 antigen       | CD                  | CD76    |       |
|     | 25.9773 |     | 26.3217 |     | 25.8691 |         | 25.5856 |         | 25.9161 |         | 25.7821 |        | 26.6136 |         | 26.1765 |         | 26.5335 |         | 25.106  |         | 25.4511 |         | 25.439          |                  | Q9Y5K6                            | Q9Y5K6              | CD2-associated pr   | CD      | CD2AP |
|     | 23.2516 |     | 22.966  |     | 24.001  |         | 23.5456 |         | 23.3291 | NaN     |         | NaN    |         | NaN     |         | NaN     |         | 24.2508 |         | 24.3572 |         | 23.8878 |                 | Q95400           | Q95400                            | CD2 antigen cyto    | CD                  | CD2BP2  |       |
|     | 23.3611 |     | 22.7746 |     | 22.6197 | NaN     |         | NaN     |         | NaN     |         | NaN    |         | NaN     |         | NaN     |         | NaN     |         | NaN     |         |         |                 | Q9NPF0;Q9NPF0    | Q9NPF0;Q9NPF0                     | CD320 antigen       | CD                  | CD320   |       |
|     | 22.3942 |     | 22.4496 |     | 22.5064 |         | 22.7507 |         | 22.6229 | NaN     |         | NaN    |         | NaN     |         | NaN     |         | NaN     |         | NaN     |         |         |                 | O15446;O15446-2  | O15446;O15446-2                   | DNA-directed RN     | CD                  | CD3EAP  |       |
|     | 24.3859 |     | 24.9685 | NaN |         | 25.0841 | NaN     |         | NaN     |         | NaN     |        | NaN     |         | NaN     |         | NaN     |         | NaN     |         | NaN     |         |                 | P25942;AOA087X   | P25942                            | Tumor necrosis fa   | CD                  | CD40    |       |
|     | 32.1172 |     | 32.3789 |     | 32.7159 |         | 32.2573 |         | 32.4302 |         | 33.1652 |        | 31.5549 |         | 31.0087 |         | 31.0349 |         | 32.8042 |         | 32.0735 |         | 32.0927         |                  | P16070;P16070-1                   | P16070;P16070-1     | CD44 antigen        | CD      | CD44  |
|     | 26.9087 |     | 26.7344 |     | 27.0182 |         | 26.49   |         | 26.2692 |         | 26.9874 |        | 27.0885 |         | 26.4907 |         | 26.8076 |         | 27.8442 |         | 27.3179 |         | 26.6043         |                  | P15529;P15529-1                   | P15529;P15529-1     | Membrane cofact     | CD      | CD46  |
|     | 24.3155 |     | 24.8913 |     | 24.7941 |         | 24.4956 |         | 24.4087 | NaN     |         | NaN    |         | NaN     |         | 25.369  |         | 25.8579 |         | 25.4076 |         | 25.3452 |                 | P15529-4;P15529  | P15529-4;P15529                   | Membrane cofact     | CD                  | CD46    |       |
|     | 28.5277 |     | 27.2649 |     | 28.3091 |         | 28.6995 |         | 27.5883 |         | 28.4758 |        | 28.3421 |         | 26.9415 |         | 27.3927 |         | 28.7769 |         | 27.8828 |         | 27.8114         |                  | Q08722;Q08722-3                   | Q08722;Q08722-3     | Leukocyte surface   | CD      | CD47  |
|     | 28.4918 |     | 28.2698 |     | 25.8493 |         | 28.5368 |         | 27.3294 |         | 25.7146 |        | 26.4113 | NaN     |         | NaN     |         | NaN     |         | 25.8014 |         | 26.3213 |                 | P08174;P08174-2  | P08174;P08174-2                   | Complement dec      | CD                  | CD55    |       |
|     | 27.5301 |     | 27.2458 |     | 27.8209 |         | 27.6592 |         | 27.3004 |         | 28.34   |        | 27.8251 |         | 27.0592 |         | 27.1562 |         | 28.6773 |         | 27.6067 |         | 27.5424         |                  | P19256-3;P19256                   | P19256-3;P19256     | Lymphocyte funct    | CD      | CD58  |
|     | 31.1097 |     | 31.6791 |     | 28.7139 |         | 30.6969 |         | 31.0383 |         | 29.2511 |        | 29.9077 | NaN     |                 | P13987;E9PNW4;i  | P13987;E9PNW4;i                   | CD59 glycoprotein   | CD                  | CD59    |       |
|     | 26.8515 |     | 25.2193 |     | 26.3758 |         | 26.1011 |         | 25.2702 |         | 25.9633 |        | 27.2487 |         | 26.0967 |         | 27.1633 |         | 26.0686 |         | 25.5388 |         | P08962;F8VNT9;F | P08962;F8VNT9;F  | CD63 antigen;Teti                 | CD                  | CD63                |         |       |
| NaN |         | NaN |         | NaN |         | 22.791  | NaN     |         | NaN     |         | NaN     |        | NaN     |         | NaN     |         | NaN     |         | NaN     |         | NaN     |         |                 | P34810;P34810-2  | P34810;P34810-2                   | Macrosiallin        | CD                  | CD68    |       |
|     | 26.3003 |     | 26.2608 |     | 26.9224 |         | 26.1107 |         | 26.2807 |         | 27.0246 |        | 27.2093 |         | 26.4408 |         | 28.1884 |         | 26.3241 |         | 25.9489 |         | 27.0318         |                  | P60033;E9PJK1;E                   | P60033;E9PJK1;E     | CD81 antigen;Teti   | CD      | CD81  |
|     | 25.0262 |     | 25.1682 |     | 26.3809 |         | 24.7058 |         | 25.8459 |         | 25.7801 | NaN    |         | NaN     |         | NaN     |         | NaN     |         | 25.038  |         | 25.2415 |                 | P27701;P27701-2  | P27701;P27701-2                   | CD82 antigen        | CD                  | CD82    |       |
|     | 30.5838 |     | 29.558  |     | 30.2422 |         | 30.201  |         | 29.3298 |         | 30.2832 |        | 30.2347 |         | 28.8061 |         | 29.6756 |         | 30.5415 |         | 29.7312 |         | 29.6562         |                  | P21926;A6NNI4;G                   | P21926;A6NNI4;G     | CD9 antigen;Tetra   | CD      | CD9   |
| NaN |         | NaN |         | NaN |         | NaN     |         | NaN     |         | NaN     |         | NaN    |         | NaN     |         | NaN     |         | NaN     |         | NaN     |         |         |                 | P40200;Q8WUE2    | P40200;Q8WUE2                     | T-cell surface prot | CD                  | CD96    |       |
|     | 30.7203 |     | 30.9373 |     | 30.9725 |         | 30.7352 |         | 30.5113 |         | 31.3325 |        | 30.6072 |         | 30.3368 |         | 30.7407 |         | 31.4987 |         | 31.1386 |         | 31.157          |                  | P48960;P48960-2                   | P48960;P48960-2     | CD97 antigen;CD     | CD      | CD97  |
| NaN |         | NaN |         | NaN |         | 21.4172 | NaN     |         | NaN     |         | NaN     |        | NaN     |         | NaN     |         | NaN     |         | 21.6065 | NaN     |         | 21.0596 |                 | P14209;A8MQT7    | P14209;A8MQT7                     | CD99 antigen        | CD                  | CD99    |       |
| NaN |         | NaN |         | NaN |         | 24.571  | NaN     |         | NaN     |         | NaN     |        | NaN     |         | NaN     |         | NaN     |         | NaN     |         | NaN     |         |                 | Q8TCZ2;AOA0U1R   | Q8TCZ2;AOA0U1R                    | CD99 antigen-like   | CD                  | CD99L2  |       |
|     | 25.3102 |     | 23.7142 |     | 24.3557 |         | 24.7121 | NaN     |         | 24.1059 |         | 23.882 |         | 24.8928 | NaN     |         | 24.0875 |         | 23.8718 |         | 23.7926 |         | 23.7926         |                  | O75794;H7BZW7                     | O75794;H7BZW7       | Cell division cycle | CD      | CD123 |
|     | 25.8531 |     | 25.151  |     | 25.4397 |         | 25.965  |         | 25.4187 |         | 25.3961 | NaN    |         | NaN     |         | NaN     |         | 25.5019 |         | 25.2578 | NaN     |         |                 | Q13042;Q13042-3  | Q13042;Q13042-3                   | Cell division cycle | CD                  | CD16    |       |
| NaN |         | NaN |         | NaN |         | 23.5416 | NaN     |         | NaN     |         | 23.638  | NaN    |         | NaN     |         | NaN     |         | NaN     |         | NaN     |         |         |                 | Q12834           | Q12834                            | Cell division cycle | CD                  | CD20    |       |
|     | 26.8531 |     | 24.9213 |     | 25.7171 |         | 27.0672 |         | 25.7476 |         | 25.5275 |        | 23.5665 |         | 24.1598 |         | 23.0382 |         | 25.2626 |         | 25.1918 |         | 24.2989         |                  | Q9UIX2;Q9UIX2-3                   | Q9UIX2;Q9UIX2-3     | Cell division cycle | CD      | CD23  |
|     | 22.9814 | NaN |         | NaN |         | NaN     |         | NaN     |         | NaN     |         | NaN    |         | NaN     |         | NaN     |         | NaN     |         | NaN     |         |         |                 | Q8NHZ8           | Q8NHZ8                            | Anaphase-promot     | CD                  | CD26    |       |
| NaN |         | NaN |         | NaN |         | 22.6238 | NaN     |         | NaN     |         | NaN     |        | NaN     |         | NaN     |         | NaN     |         | NaN     |         | NaN     |         |                 | G5EA36;J3L394;J3 | G5EA36                            |                     | CD                  | CD27    |       |
|     | 26.0932 |     | 24.9011 |     | 25.2118 |         | 26.2771 |         | 24.8962 |         | 24.8699 |        | 23.3176 |         | 23.8275 | NaN     |         | 24.4855 |         | 24.1923 |         | 24.2241 |                 | P30260;P30260-2  | P30260;P30260-2                   | Cell division cycle | CD                  | CD27    |       |
|     | 22.7494 |     | 22.5583 |     | 22.4804 |         | 22.5129 |         | 22.4018 |         | 22.5147 |        | 22.4922 | NaN     |         | 22.9382 |         | 22.8286 |         | 22.6439 | NaN     |         |                 | P49427;U3KQ77;I  | P49427;U3KQ77;I                   | Ubiquitin-conjuga   | CD                  | CD34    |       |
|     | 28.3478 |     | 28.3871 |     | 28.3124 |         | 28.0823 |         | 27.9974 |         | 28.2105 |        | 28.7457 |         | 28.2059 |         | 28.2131 |         | 28.1506 |         | 28.0651 |         | 28.4315         |                  | Q16543;K7EKQ2                     | Q16543;K7EKQ2       | Hsp90 co-chapero    | CD      | CD37  |
|     | 22.8767 | NaN |         |     | 21.6219 |         | 22.1201 | NaN     |         | 21.6414 | NaN     |        | NaN     |         | NaN     |         | NaN     |         | NaN     |         | NaN     |         |                 |                  | O60508;Q5SRN1                     | O60508;Q5SRN1       | Pre-mRNA-proces     | CD      | CD40  |
|     | 29.0429 |     | 29.2735 |     | 29.7291 |         | 28.8646 |         | 29.3016 |         | 29.3423 |        | 29.4625 |         | 29.3364 |         | 30.2598 |         | 29.6171 |         | 29.5647 |         | 30.3511         |                  | P60953;P60953-1                   | P60953;P60953-1     | Cell division contr | CD      | CD42  |
|     | 24.1416 |     | 24.5082 |     | 24.3722 |         | 23.925  |         | 24.2053 |         | 24.6597 |        | 23.9667 | NaN     |         | NaN     |         | 24.6993 |         | 24.2741 |         | 24.7374 |                 | Q5VT25;Q5VT25-3  | Q5VT25;Q5VT25-3                   | Serine/threonine    | CD                  | CD42BPA |       |
|     | 26.404  |     |         |     |         |         |         |         |         |         |         |        |         |         |         |         |         |         |         |         |         |         |                 |                  |                                   |                     |                     |         |       |



|         |         |         |         |         |         |         |         |         |         |         |         |         |                 |                 |                      |                |
|---------|---------|---------|---------|---------|---------|---------|---------|---------|---------|---------|---------|---------|-----------------|-----------------|----------------------|----------------|
| 21.8876 | NaN     |         | 22.0359 | 21.8855 | 21.6922 | NaN     | NaN     | NaN     | NaN     | NaN     | 21.3508 | NaN     | Q6P1J9          | Q6P1J9          | Parafibromin         | CDC73          |
| 25.0699 |         | 26.2309 | 26.1573 | 25.2192 | 26.1999 | 26.3462 | 25.6944 | 25.9468 | 25.8012 | 26.1311 | 26.2907 | 27.0192 | Q99618;F5GX58;F | Q99618;F5GX58;F | Cell division cycle  | CDCA3          |
| NaN     | NaN     | NaN     | NaN     | 22.2418 | NaN     | Q96FF9;B5MBX0   | Q96FF9;B5MBX0   | Sororin              | CDCA5          |
| 23.4679 |         | 23.8385 | 23.8274 | 24.0042 | 23.7416 | 24.2348 | 26.032  | 25.4447 | 25.7288 | 23.2473 | 24.0411 | 22.8607 | Q53HL2          | Q53HL2          | Borealin             | CDCA8          |
| 29.7466 |         | 30.5096 | 30.4624 | 30.1438 | 30.235  | 30.6413 | 30.5752 | 30.2026 | 30.9275 | 31.2136 | 30.7969 | 30.9482 | Q9H5V8;Q9H5V8   | Q9H5V8;Q9H5V8   | CUB domain-cont      | CDCP1          |
| NaN     | 21.6747 | NaN     | NaN     | NaN     | NaN     | P55290;A0A087X  | P55290;A0A087X  | Cadherin-13          | CDH13          |
| 24.6635 |         | 24.4366 | 24.4404 | 24.6986 | 24.32   | 24.7819 | 26.477  | 26.0889 | 24.482  | 25.9414 | 25.2933 | 25.1205 | P55283;A0A087W  | P55283;A0A087W  | Cadherin-4           | CDH4           |
| 29.5178 |         | 29.4428 | 29.4338 | 29.0957 | 29.4547 | 29.4065 | 29.3173 | 29.1455 | 29.3214 | 29.9905 | 30.9689 | 29.5578 | P06493;A0A024Q  | P06493;A0A024Q  | Cyclin-dependent     | CDK1;CDC2      |
| 25.4983 |         | 24.1168 | 24.4868 | 25.6091 | 24.1829 | 24.5336 | NaN     | NaN     | NaN     | 25.55   | 25.3145 | NaN     | P21127;P21127-9 | P21127;P21127-9 | Cyclin-dependent     | CDK11B;CDC21;C |
| 23.7876 | NaN     |         | 23.3725 | 24.5761 | 23.2611 | 23.499  | NaN     | NaN     | NaN     | 23.625  | 23.4794 | NaN     | Q9NYV4;Q9NYV4   | Q9NYV4;Q9NYV4   | Cyclin-dependent     | CDK12          |
| 22.4698 | NaN     |         | NaN     | 22.5905 | NaN     | Q14004;Q14004-2 | Q14004;Q14004-2 | Cyclin-dependent     | CDK13          |
| 20.7095 | NaN     |         | NaN     | Q00536;Q00536-2 | Q00536;Q00536-2 | Cyclin-dependent     | CDK16          |
| 23.9796 |         | 23.7993 | 23.8141 | 23.4692 | 23.7394 | 24.1648 | 23.7123 | NaN     | NaN     | 24.2088 | NaN     | NaN     | Q00537;Q00537-2 | Q00537;Q00537-2 | Cyclin-dependent     | CDK17          |
| 24.2173 |         | 23.5893 | 24.0293 | 23.5608 | NaN     | 23.9597 | 23.7351 | NaN     | NaN     | 24.255  | 24.4868 | 23.5767 | P24941;G3V5T9;P | P24941;G3V5T9;P | Cyclin-dependent     | CDK2           |
| 23.259  | NaN     |         | NaN     | 22.6915 | NaN     | P11802;F8VYH9;F | P11802;F8VYH9;F | Cyclin-dependent     | CDK4           |
| 26.7019 |         | 25.7233 | 26.1629 | 26.3465 | 26.3647 | 26.2545 | 25.6168 | 25.6088 | 26.0066 | 26.3324 | 26.7178 | 26.0697 | Q00535;Q00535-2 | Q00535;Q00535-2 | Cyclin-dependent     | CDK5           |
| 25.5616 |         | 24.9747 | 24.1677 | 24.6368 | 25.2329 | 24.2263 | 22.3889 | NaN     | 23.7995 | 24.4139 | 24.4427 | 24.0655 | Q96JB5;Q96JB5-4 | Q96JB5;Q96JB5-4 | CDK5 regulatory s    | CDK5RAP3       |
| 24.4252 |         | 23.777  | 24.1599 | 24.1746 | 23.6609 | 23.995  | 23.8151 | NaN     | 24.1152 | 24.0358 | 24.1761 | 24.2745 | Q00534          | Q00534          | Cyclin-dependent     | CDK6           |
| 24.4328 |         | 24.4154 | 24.8019 | 24.7896 | 24.8977 | 24.9723 | 23.3487 | NaN     | 25.6261 | 24.2679 | 24.7842 | 24.8565 | P50613;D6R9G1;F | P50613;D6R9G1;F | Cyclin-dependent     | CDK7           |
| 23.7013 | NaN     |         | 22.7333 | 23.2751 | NaN     | NaN     | NaN     | NaN     | NaN     | 23.507  | 23.3151 | NaN     | P50750;P50750-2 | P50750;P50750-2 | Cyclin-dependent     | CDK9           |
| NaN     | NaN     |         | NaN     | 21.061  | 20.8901 | NaN     | Q5VV42;Q5VV42-  | Q5VV42;Q5VV42-  | Threonylcarbam       | CDKAL1         |
| NaN     | NaN     | NaN     | NaN     | 21.9941 | NaN     | Q9NXV6;J3KNE1;F | Q9NXV6;J3KNE1;F | CDKN2A-interacti     | CDKN2AIP       |
| 22.9664 |         | 23.9073 | 23.479  | 23.8287 | 24.0886 | 23.6005 | NaN     | NaN     | NaN     | 24.2875 | 25.0756 | 24.1077 | Q96HQ2-2;Q96HC  | Q96HQ2-2;Q96HC  | CDKN2AIP N-term      | CDKN2AIPNL     |
| 25.7469 |         | 26.7928 | 25.9855 | 25.3318 | 26.3757 | 25.5541 | 25.4474 | 26.1543 | 25.7151 | 25.0029 | 25.4328 | 26.35   | Q9UKY7;Q9UKY7-  | Q9UKY7;Q9UKY7-  | Protein CDV3 hom     | CDV3           |
| NaN     | NaN     | NaN     | NaN     | 21.753  | NaN     | Q9Y232;Q9Y232-2 | Q9Y232;Q9Y232-2 | Chromodomain Y-      | CDYL           |
| 22.2434 | NaN     |         | NaN     | 22.4968 | NaN     | P17676;P17676-2 | P17676;P17676-2 | CCAAT/enhancer-      | CEBPB          |
| 24.025  | NaN     |         | 23.2521 | 24.4587 | 23.2097 | 23.2237 | NaN     | NaN     | NaN     | NaN     | NaN     | NaN     | Q03701;A0A087X  | Q03701;A0A087X  | CCAAT/enhancer-      | CEBPZ          |
| 25.8046 |         | 24.2846 | 25.0604 | 25.8782 | 24.6    | 24.8077 | NaN     | 24.0506 | 24.6008 | 25.2661 | 24.9082 | 23.6776 | Q9BXW7;Q9BXW7   | Q9BXW7;Q9BXW7   | Cat eye syndrome     | CECR5          |
| 27.3388 |         | 26.8442 | 26.9455 | 27.7919 | 26.9259 | 27.1945 | 26.091  | 25.8232 | 26.2072 | 26.3648 | 26.7461 | 26.165  | Q92879;G5EA30;C | Q92879;G5EA30;C | CUGBP Elav-like f    | CELF1          |
| 24.0469 |         | 25.0892 | 24.0284 | 24.3198 | 24.2697 | NaN     | Q02224;A0A087X  | Q02224;A0A087X  | Centromere-assoc     | CENPE          |
| 29.0059 |         | 30.6901 | NaN     | 27.5382 | NaN     | NaN     | NaN     | 31.5782 | NaN     | 28.9205 | NaN     | NaN     | P49454          | P49454          | Centromere prote     | CENPF          |
| 23.8445 |         | 23.5167 | 23.7627 | 24.482  | 24.1298 | 23.8564 | NaN     | NaN     | NaN     | 23.5613 | 23.8854 | NaN     | Q7Z7K6;Q7Z7K6-3 | Q7Z7K6;Q7Z7K6-3 | Centromere prote     | CENPV          |
| NaN     | 22.1954 | NaN     | NaN     | NaN     | NaN     | NaN     | Q9UPN4;Q9UPN4   | Q9UPN4;Q9UPN4   | Centrosomal prot     | CEP131         |
| 24.2942 |         | 25.3275 | 24.6598 | 24.1238 | 24.3901 | 24.2249 | NaN     | NaN     | NaN     | NaN     | NaN     | NaN     | Q5SW79;H0Y2V6;  | Q5SW79;H0Y2V6;  | Centrosomal prot     | CEP170         |
| 21.8798 | NaN     |         | NaN     | Q9BV73;Q9BV73-  | Q9BV73;Q9BV73-  | Centrosome-assoc     | CEP250         |
| NaN     | 22.2487 | Q9BYV8;Q9BYV8-  | Q9BYV8;Q9BYV8-  | Centrosomal prot     | CEP41          |
| 28.3293 |         | 28.6635 | 28.7714 | 28.6724 | 28.5104 | 29.1718 | 30.2008 | 29.0139 | 29.3446 | 29.5653 | 28.8047 | 28.8491 | Q53EZ4;Q53EZ4-2 | Q53EZ4;Q53EZ4-2 | Centrosomal prot     | CEP55          |
| NaN     | 30.0809 | NaN     | NaN     | NaN     | NaN     | NaN     | Q96MT8;Q96MT8   | Q96MT8;Q96MT8   | Centrosomal prot     | CEP63          |
| 22.0956 | NaN     |         | NaN     | 22.135  | NaN     | NaN     | NaN     | NaN     | NaN     | 22.2457 | NaN     | NaN     | Q8TAP6;Q8TAP6-  | Q8TAP6;Q8TAP6-  | Centrosomal prot     | CEP76          |
| 24.5487 |         | 23.6475 | 23.9165 | 24.3715 | 23.7218 | 23.7019 | 24.7555 | NaN     | 23.6971 | 24.036  | 24.0112 | 24.0926 | Q8IW35;E9PG22;f | Q8IW35;E9PG22;f | Centrosomal prot     | CEP97          |
| 23.757  | NaN     |         | 23.902  | 24.2068 | 24.29   | 24.092  | 24.668  | NaN     | 24.7121 | NaN     | NaN     | NaN     | Q96G23;Q5SZE3;f | Q96G23;Q5SZE3;f | Ceramide synthas     | CERS2          |
| 24.0232 |         | 24.6446 | 24.5895 | 23.9835 | 23.6435 | NaN     | 23.8394 | 24.0673 | 23.8656 | 24.1319 | 24.8468 | 24.4201 | P41208;Q12798   | P41208;Q12798   | Centrin-2;Centrin-   | CETN2;CETN1    |
| 21.6371 | NaN     |         | 22.5952 | 21.984  | NaN     | O15182;E5RK82;E | O15182;E5RK82;E | Centrin-3            | CETN3          |
| NaN     | NaN     | NaN     |         | 22.0162 | NaN     | NaN     | NaN     | NaN     | NaN     | 20.9171 | NaN     | NaN     | Q9Y6A4          | Q9Y6A4          | Cilia- and flagella- | CFAP20         |
| NaN     | 22.3529 | NaN     | NaN     | NaN     | Q96G28;B5MC35;  | Q96G28;B5MC35;  | Cilia- and flagella- | CFAP36         |
| NaN     | 25.6754 | NaN     | NaN     | NaN     | NaN     | NaN     | P08603;Q5TFM2;f | P08603;Q5TFM2;f | Complement fact      | CFH            |
| 31.3843 |         | 33.0372 | 32.8887 | 31.6305 | 32.6917 | 32.673  | 33.1812 | 33.2167 | 32.8195 | 33.024  | 33.0704 | 33.3021 | P23528;E9PP50;E | P23528;E9PP50;E | Cofilin-1            | CFL1           |
| 27.389  |         | 27.6311 | 27.3531 | 26.7239 | 27.1843 | 27.3181 | 27.1758 | 26.1843 | 25.511  | 28.0732 | 26.683  | 26.0332 | Q9Y281;Q9Y281-3 | Q9Y281;Q9Y281-3 | Cofilin-2            | CFL2           |
| NaN     | 26.9692 | NaN     | 26.3851 | 27.1557 | Q9P2M7;Q9P2M7   | Q9P2M7;Q9P2M7   | Cingulin             | CGN            |
| NaN     | NaN     | NaN     | NaN     | 28.6213 | NaN     | Q13111;Q13111-2 | Q13111;Q13111-2 | Chromatin assem      | CHAF1A         |
|         | 23.1663 | NaN     | 22.7163 | 22.6974 | 22.8204 | 23.3302 | NaN     | 22.4269 | NaN     | NaN     | NaN     | 23.8594 | Q13112          | Q13112          | Chromatin assem      | CHAF1B         |
| NaN     | 20.9496 | Q96BP2          | Q96BP2          | Coiled-coil-helix-c  | CHCHD1         |
| NaN     | 24.0926 | NaN     | NaN     | NaN     | NaN     | NaN     | Q9Y6H1;Q5T1J5   | Q9Y6H1;Q5T1J5   | Coiled-coil-helix-c  | CHCHD2;CHCHD2f |
| NaN     | 22.8352 |         | 22.1447 | NaN     | 22.8663 | NaN     | NaN     | 24.6141 | 24.3523 | NaN     | NaN     | NaN     | Q9NX63;C9JR26;F | Q9NX63;C9JR26;F | MICOS complex s      | CHCHD3         |
| 24.0625 | NaN     |         | 23.7528 | 24.1464 | 23.7534 | NaN     | NaN     | NaN     | NaN     | 23.6977 | 24.0338 | NaN     | O14646;O14646-2 | O14646;O14646-2 | Chromodomain-h       | CHD1           |
| 21.4782 | NaN     |         | 21.1417 | 22.0805 | NaN     | NaN     | NaN     | NaN     | NaN     | NaN     | 21.1698 | NaN     | O14647;O14647-2 | O14647;O14647-2 | Chromodomain-h       | CHD2           |
| 27.9342 |         | 27.0342 | 27.5193 | 28.2311 | 27.7932 | 27.8482 | 25.5396 | 26.0791 | 25.2816 | 27.9708 | 28.1011 | 27.4103 | Q14839;F5GWX5;  | Q14839;F5GWX5;  | Chromodomain-h       | CHD4           |
| 21.1607 | NaN     |         | NaN     | O14757;J3KN87;C | O14757;J3KN87;C | Serine/threonine-    | CHEK1          |
| 25.4033 |         | 24.5795 | 25.1133 | 25.675  | 25.1462 | 25.4495 | 23.8701 | NaN     | 23.6733 | 25.3225 | 25.275  | 24.8574 | Q8IWX8;J3QK89   | Q8IWX8;J3QK89   | Calcium homeost:     | CHERP          |
| 25.0331 |         | 25.0067 | 25.1124 | 24.8099 | 24.6327 | 24.7331 | 24.5496 | NaN     | NaN     | 24.3853 | 24.2112 | NaN     | Q9UKJ5;H0Y8H1;f | Q9UKJ5;H0Y8H1;f | Cysteine-rich hyd    | CHIC2          |



|     |         |         |         |         |         |         |         |         |         |         |         |        |         |         |                                                                      |
|-----|---------|---------|---------|---------|---------|---------|---------|---------|---------|---------|---------|--------|---------|---------|----------------------------------------------------------------------|
|     | NaN     | NaN     | NaN     | NaN     | NaN     | NaN     | 22.1157 | NaN     | NaN     | NaN     | NaN     | NaN    | NaN     | NaN     | Q9BWS9;Q9BWS9 Q9BWS9;Q9BWS9 Chitinase domain- CHID1                  |
|     | 24.3296 | 23.0617 | 23.3806 | 24.1984 |         | 23.0601 | 23.3585 | NaN     |         | 24.0134 | NaN     |        | 23.9188 | 23.8417 | 23.4174 P35790;P35790-2, P35790;P35790-2, Choline kinase alp CKA     |
|     | 23.1038 | NaN     | 23.3859 | NaN     | NaN    | NaN     | NaN     | P24386 P24386 Rab proteins gera CHM                                  |
|     | 23.1656 | NaN     | 22.9541 | NaN     |         | 22.756  | NaN     |         | 23.3355 | NaN     | NaN     |        | 23.4183 | 23.2821 | NaN P26374 P26374 Rab proteins gera CHML                             |
|     | 27.6902 | 28.3834 | 27.8922 |         | 27.4142 | 28.0547 | 27.9095 |         | 28.8095 | 28.6373 | 29.3939 |        | 28.2405 | 28.1316 | 29.1559 Q9HD42;F8VUA2; Q9HD42;F8VUA2; Charged multivesi CHMP1A       |
|     | 27.4425 | 28.9039 | 27.8457 | 26.844  |         | 28.21   | 27.6701 |         | 28.9741 | 28.8002 | 29.4426 |        | 27.4056 | 27.8437 | 28.7964 Q7LBR1 Q7LBR1 Charged multivesi CHMP1B                       |
|     | 28.1013 | 28.4279 | 28.2963 | 27.7009 |         | 27.8951 | 28.2938 |         | 29.2255 | 29.0631 | 29.7737 |        | 28.1402 | 28.1389 | 28.9986 O43633;M0R1L7;l O43633;M0R1L7;l Charged multivesi CHMP2A     |
|     | 25.8969 | 25.7064 | 25.4966 | 25.052  |         | 25.7233 | 25.3878 |         | 27.399  | 26.8167 | 27.5142 |        | 26.1721 | 26.0343 | 27.4106 Q9UQN3;C9JOA7; Q9UQN3;C9JOA7; Charged multivesi CHMP2B       |
|     | 26.8533 | 26.3739 | 27.0786 | 26.3045 |         | 25.944  | 26.8238 |         | 27.5864 | 26.8376 | 27.4337 |        | 26.7568 | 26.6464 | 27.4301 Q9Y3E7;Q9Y3E7-3 Q9Y3E7;Q9Y3E7-3 Charged multivesi CHMP3      |
|     | 25.6813 | 25.6434 | 25.8274 | 25.7749 |         | 24.9702 | 25.6845 |         | 26.4843 | 26.1203 | 26.1729 |        | 26.0028 | 25.6323 | 26.3351 E9PSI1;Q9BY43;E E9PSI1;Q9BY43;E Charged multivesi CHMP4A     |
|     | 29.0889 | 29.2626 | 29.5555 | 28.6488 |         | 29.0107 | 29.4628 |         | 30.6964 | 30.6542 | 30.8613 |        | 29.5524 | 29.8769 | 30.7633 Q9H444;Q96CF2;l Q9H444 Charged multivesi CHMP4B              |
|     | 27.0814 | 26.3967 | 26.7443 | 25.9457 |         | 25.8955 | 26.7786 |         | 27.761  | 27.5351 | 27.8531 |        | 26.7428 | 25.9421 | 27.3525 Q9NZZ3;Q9NZZ3-; Q9NZZ3;Q9NZZ3-; Charged multivesi CHMP5      |
|     | 25.5219 | 25.1865 | 25.8489 | 25.4194 |         | 25.2228 | 25.9901 |         | 25.7988 | NaN     | 25.7579 |        | 26.0249 | 26.7767 | 26.1527 Q96FZ7;l3LA41;l3 Q96FZ7;l3LA41 Charged multivesi CHMP6       |
|     | 23.6564 | 22.7573 | 23.0764 | 22.7411 |         | 22.968  | NaN     |         | 23.6374 | NaN     |         | NaN    | 23.5262 | 22.7459 | Q8WUX9;ESRJ3;E Q8WUX9 Charged multivesi CHMP7                        |
|     | 25.9713 | 25.2069 | 25.2131 | 25.5735 |         | 25.0975 | 25.2694 |         | 25.7513 |         | 25.0714 |        | 25.7373 | 25.7168 | 25.4441 Q9UHD1;Q9UHD1 Q9UHD1;Q9UHD1 Cysteine and histi CHORDC1       |
|     | 25.1113 | 24.6916 | 24.6883 | 24.7956 |         | 24.0936 | 24.1806 |         | 24.7614 | NaN     |         |        | 25.29   | 23.986  | NaN Q99653;HOYNG9;l Q99653;HOYNG9;l Calcineurin B hom CHP1           |
| NaN |         | NaN     |         | 20.5263 | NaN     | NaN    | NaN     |         | Q8IU2S;Q8IZ52-2; Q8IZ52;Q8IZ52-2; Chondroitin sulfat CHPF            |
|     | 23.5681 | 23.2068 | 23.04   | 23.2302 |         | 23.6761 | 23.0504 | NaN     |         | NaN     |         |        | 22.9996 | 23.7095 | 23.5826 Q9NRG0;E5RG59 Q9NRG0;E5RG59 Chromatin access CHRAC1          |
| NaN |         | 22.1219 | NaN     | NaN     |         | 22.1437 | NaN     |         | 24.2925 | 23.2155 | NaN     | NaN    | NaN     |         | F8VKX3;Q9NPF2-z F8VKX3;Q9NPF2-z Carbohydrate sulf CHST11             |
|     | 22.4618 | 22.1982 | 21.6356 | 22.3675 | NaN     |         | 21.6059 |         | 23.9385 | NaN     | NaN     |        | 21.6945 | NaN     | NaN Q8NCCH0;HOYN6S Q8NCCH0;HOYN6S Carbohydrate surf CHST14           |
|     | 24.8411 | 23.8231 | 25.5035 | 25.7458 |         | 24.9229 | 25.2358 | NaN     |         | NaN     | 25.7859 |        | 25.3694 | 25.3772 | 25.4878 Q8WWVB6;Q8WWBI Q8WWVB6;Q8WWBI Chromosome trar CHTT18         |
| NaN |         | NaN     | NaN    | NaN     |         | 19.7089 POCG13;E5RGJ5;j POCG13;E5RGJ5;j Chromosome trar CHTF8        |
|     | 24.1917 | NaN     | 23.6721 | 23.8479 | NaN     |         | 23.6677 | NaN     |         | NaN     | NaN     |        | 23.4831 | NaN     | Q9Y3Y2;Q9Y3Y2-4 Q9Y3Y2;Q9Y3Y2-4 Chromatin target CHTOP               |
|     | 26.3515 | 24.211  | 25.2596 | 26.1424 |         | 24.7126 | 25.0994 |         | 23.7998 | NaN     |         |        | 25.4971 | 24.7685 | NaN O15111 O15111 Inhibitor of nucleu CHUK                           |
| NaN |         | NaN     | NaN     |         | 21.548  | NaN     | NaN     | NaN     | NaN     | NaN     | NaN     | NaN    | NaN     | NaN     | B4DL54;P49356;P B4DL54;P49356;P Protein farnesyltr: CHURC1-FNTB;FNTB |
|     | 25.5    | 24.6909 | 24.8737 | 25.0685 | 24.3669 |         | 24.8172 |         | 25.031  | NaN     |         |        |         | 25.3135 | NaN O76071 O76071 Probable cytosolic CIAO1                           |
|     | 24.7789 | 24.5147 | 24.3369 | 24.4395 | 24.3797 |         | 24.5765 |         | 25.4694 | NaN     | 25.3209 |        | 25.158  | 25.0288 | 25.5492 Q6FI81;H3BV90;Q Q6FI81;H3BV90;Q Anamorfin CIAPIN1            |
|     | 23.3655 | 23.3328 | 23.0811 | 23.1124 | 23.5095 |         | 23.4605 | NaN     | NaN     | NaN     | NaN     | NaN    | NaN     | NaN     | Q99828;Q99828-z Q99828;Q99828-z Calcium and integ CIB1               |
|     | 22.8435 | NaN     | 22.8432 | 23.318  | 22.2714 |         | 22.7634 | NaN     | NaN     | NaN     | NaN     | NaN    | NaN     | NaN     | Q9BW66;HOYN33 Q9BW66;HOYN33; Cyclin-dependent C1NP                   |
|     | 23.7896 | 25.4309 | 24.864  | 23.557  | 25.0244 |         | 24.8614 | 24.1862 | NaN     |         | 25.0604 |        | 23.1797 | 24.8529 | 24.914 Q14011;K7EJV1;K Q14011;K7EJV1;K Cold-inducible RN CIRBP       |
|     | 26.2239 | 25.0027 | 25.2647 | 26.6922 | 25.7782 |         | 25.5475 | 24.5996 |         | 24.0202 | 25.6587 |        | 26.0157 | 26.0508 | 23.6258 Q969X6;H3BSH7;X Q969X6;H3BSH7;X; Cirhin CIRH1A               |
|     | 22.5149 | 23.9175 | 23.3934 | 22.8088 | NaN     |         | 23.1039 |         | 23.1659 | NaN     | NaN     | NaN    | NaN     | NaN     | Q9N245 Q9N245 CDGS5 iron-sulfur C1SD1                                |
|     | 23.9157 | 22.7665 | 23.6072 | 24.0993 | 22.9672 | NaN     |         | 23.8263 | NaN     | NaN     | NaN     | NaN    | NaN     | NaN     | Q8N5K1;l3L1N9 Q8N5K1;l3L1N9 CDGS5 iron-sulfur C1SD2                  |
|     | 29.3687 | 29.3419 | 30.0606 | 29.3519 | 29.451  |         | 30.1192 | 31.59   |         | 30.8953 | 30.6692 |        | 29.9414 | 29.6251 | 29.9897 O14578-4;O1457E O14578-4;O1457E Citron Rho-interac CIT       |
|     | 23.5279 | 23.6417 | 23.4348 | 23.4227 | 23.6523 | NaN     |         | NaN     | NaN     | NaN     | NaN     |        | 23.6672 | NaN     | Q8WWK9;Q8VWV Q8WWK9;Q8WW Cytoskeleton-assc CKAP2                     |
|     | 29.7768 | 29.9756 | 29.8246 | 29.8493 | 29.7598 |         | 29.9359 | 29.826  |         | 30.0062 | 30.6839 |        | 29.6265 | 29.3799 | 29.8954 Q07065 Q07065 Cytoskeleton-assc CKAP4                        |
|     | 27.0284 | 26.7292 | 26.8753 | 26.4462 | 26.6443 |         | 26.5422 | 27.1929 |         | 26.7986 | 27.1367 |        | 26.3995 | 26.5979 | 26.6761 Q14008;Q14008-z Q14008;Q14008-z Cytoskeleton-assc CKAP5      |
|     | 25.898  | 25.7951 | 25.0775 | 25.5514 | 25.8302 |         | 24.9163 | 26.8912 |         | 26.6802 | 25.9458 |        | 26.4678 | 25.6635 | 25.6175 P12277;G3V4N7;P P12277;G3V4N7 Creatine kinase B-CKB          |
|     | 23.7051 | NaN     | NaN     | 23.8391 | NaN     | NaN    | 24.7504 | NaN     | NaN Q9UBR5;Q9UBR5 Q9UBR5;Q9UBR5 Chemokine-like facyl:CKLF-CMTM1      |
|     | 24.1992 | 24.211  | 23.9522 | 22.9976 | 23.6152 |         | 23.435  | 24.1859 |         | 24.7074 | 24.6656 |        | 23.9281 | 23.7469 | 23.9341 P61024;Q5T179;C P61024;Q5T179;C Cyclin-dependent CKS1B       |
| NaN |         | NaN     | 24.2489 | 23.1918 | 24.3695 |         | 24.1253 | 24.7916 | NaN     |         | 24.7755 |        | 24.9188 |         | 24.5608 P33552 P33552 Cyclin-dependent CKS2                          |
|     | 23.5413 | 23.4315 | 23.506  | 23.8009 | 22.697  |         | 22.8577 | NaN     |         | 23.2659 | 22.4585 |        | 22.5477 |         | 23.5046 Q7Z460;Q7Z460-z Q7Z460;Q7Z460-z CLIP-associating p CLASP1    |
|     | 25.5738 | 25.6255 | 25.5272 | 25.5994 | 25.1105 |         | 24.9787 | 26.0907 |         | 26.1165 | 27.3463 |        | 25.4826 | 25.4438 | 26.4977 E7ER18;E7EW49;O E7ER18;E7EW49;O CLIP-associating p CLASP2    |
|     | 23.7491 | 23.1488 | 23.7832 | 23.7878 | 23.7573 |         | 23.9968 | 23.3648 |         | 23.5035 | 24.3976 |        | 24.3617 | 24.1056 | NaN P51790;A0A087W H(+)/Cl(-) exchang CLCN3                          |
| NaN |         | NaN     | 22.7539 | 22.5904 | NaN     |        | 22.8251 | NaN     | NaN P51793;G3XAG5;f P51793;G3XAG5;f H(+)/Cl(-) exchang CLCN4         |
|     | 25.3152 | 24.3083 | 24.6274 | 24.6988 | 24.1007 |         | 24.5339 | 23.8149 |         | 24.3019 | 23.8186 | NaN    |         | 23.855  | 24.1027 P51798;P51798-z P51798;P51798-z H(+)/Cl(-) exchang CLCN7     |
| NaN |         | NaN     | 22.475  | NaN     | NaN     | NaN     |         | NaN     | NaN     | NaN     | NaN     | NaN    | NaN     | NaN     | NaN P56749 P56749 Claudin-12 CLDN12                                  |
|     | 26.015  | 24.3907 | 25.6003 | 25.3265 | 24.606  |         | 25.4991 | 25.925  | NaN     |         | 25.3157 |        | 26.2162 | 25.1121 | 24.6824 Q9NY35;D6RIU2;f Q9NY35;D6RIU2;f Claudin domain-α CLDN01      |
|     | 22.6753 | 22.1143 | 23.1212 | 23.0387 | 22.5976 |         | 23.2109 | NaN     |         | NaN     | NaN     | NaN    | NaN     | NaN     | NaN O14967;D6RAZ4;C O14967 Calmegin CLGN                             |
|     | 32.0452 | 32.1405 | 32.8536 | 32.3753 | 32.7417 |         | 32.9426 | 31.9598 |         | 31.2994 | 31.8112 |        | 32.576  | 32.6997 | 32.6311 O00299 O00299 Chloride intracell. CLIC1                      |
|     | 31.3575 | 30.8013 | 32.1228 | 31.6689 | 31.2448 |         | 32.3258 | 30.5636 |         | 29.4049 | 29.6141 |        | 31.9845 | 31.4201 | 30.6258 Q9Y696;O15247;f Q9Y696 Chloride intracell. CLIC4             |
|     | 24.8747 | 24.5581 | 25.5872 | 25.3148 | 24.9679 |         | 24.6903 | 25.3349 |         | 23.9474 | 24.2443 |        | 26.1859 | 25.7004 | 25.7854 Q96NY7;Q96NY7- Q96NY7;Q96NY7- Chloride intracell. CLIC6      |
|     | 25.3326 | 25.2868 | 25.4742 | 25.216  | 25.4122 |         | 25.2823 | 25.6784 | NaN     |         | 24.4945 |        | 26.1479 | 25.7228 | 24.7115 Q14677;Q14677-z Q14677;Q14677-z Clathrin interacto: CLINT1   |
|     | 26.4623 | 26.9482 | 26.5122 | 25.8969 | 26.4297 |         | 26.4812 | 26.0491 |         | 26.7403 | 25.8473 |        | 25.4901 | 26.1937 | 26.6952 P30622;P30622-z P30622;P30622-z CAP-Gly domain-C CLIP1       |
| NaN |         | NaN     | NaN     | 20.9705 | NaN     | NaN    | NaN     | NaN     | NaN Q8N3C7;B5MCH3 Q8N3C7;B5MCH3 CAP-Gly domain-c CLIP4               |
| NaN |         | NaN     |         | 23.0064 | NaN     | NaN    | NaN     | NaN     | NaN P49759;P49759-3 P49759;P49759-3; Dual specificity pr CLK1;CLK4   |
|     | 22.1988 | NaN     | 22.0955 | 22.77   | NaN     | NaN     | NaN     | NaN     | NaN     | NaN     | 22.2776 | NaN    | NaN     | NaN     | NaN P49761;P49761-1 P49761;P49761-1; Dual specificity pr CLK3        |
| NaN |         | NaN     | 22.6454 | NaN     |         | 22.2257 | 22.9584 | NaN     | NaN     | NaN     |         | 23.618 | 23.5452 | 23.8576 | Q9H6B4 Q9H6B4 CXADR-like memb: CLMP                                  |
|     | 22.1525 | NaN     | NaN    | NaN     | NaN     | NaN Q13286;Q9UBD8; Q13286;Q9UBD8; Battenin CLN3                      |
|     | 26.3069 | 24.8459 | 25.6667 | 25.6232 | 24.9479 |         | 25.5825 | 25.999  |         | 25.4112 | 25.4651 |        | 26.1882 | 26.1646 | 25.8292 P54105;E9PMI6;j P54105;E9PMI6;j; Methylosome sub CLN1S1A     |



|         |         |         |         |         |         |         |         |         |         |         |         |         |                                                                |                                                          |
|---------|---------|---------|---------|---------|---------|---------|---------|---------|---------|---------|---------|---------|----------------------------------------------------------------|----------------------------------------------------------|
| 22.5471 | 22.1207 | 21.9745 | 22.881  | 22.197  | NaN     |         | 21.8761 | NaN     | NaN     | NaN     |         | 22.5554 | NaN                                                            | Q92989;E9PL17;Q Q92989;E9PL17;Q Polyribonucleotid. CLP1  |
| 24.857  | 24.5633 | 24.4319 | 24.886  | 24.4043 | 24.6303 | 24.1693 | 23.8741 | NaN     |         | 25.0305 | 25.0328 | NaN     | Q9H078;HOYGM0 Q9H078;HOYGM0 Caseinolytic pepti CLPB            |                                                          |
| 25.5581 | 25.1984 | 25.0387 | 25.2966 | 25.5105 | 25.2122 | NaN     | NaN     |         | 25.5708 | 24.7392 | 25.0337 | NaN     | Q16740;M0R208; Q16740;M0R208 ATP-dependent Cl CLPP             |                                                          |
| 24.0268 | 23.6528 | 24.4257 | 24.1173 | 23.9766 | 24.2937 | 24.6718 |         | 25.3014 | 25.425  | 25.1043 | 24.6937 | 24.7095 | O96005;O96005-4 O96005;O96005-4 Cleft lip and palat CLPTM1     |                                                          |
| 22.1495 | NaN     | 23.1625 | 23.1068 | 23.0112 | 23.6058 | NaN     |         | 23.7175 | 24.605  | 23.3214 | 22.5828 | 23.7629 | Q96KA5;Q96KA5- Q96KA5;Q96KA5- Cleft lip and palat CLPTM1L      |                                                          |
| 25.0315 | 24.8019 | 23.9185 | 25.9778 | 24.9096 | 24.3609 | NaN     | NaN     |         | 23.8922 | 22.2452 | NaN     | NaN     | O76031;HOYM48 O76031 ATP-dependent Cl CLPX                     |                                                          |
| 26.0337 | 26.1374 | 25.801  | 26.4401 | 25.8456 | 24.2408 | 28.8822 | 28.7804 | NaN     |         | 26.1934 | 26.1577 | NaN     | O94985;O94985-2 O94985;O94985-2 Calsyntenin-1;Soli CLSTN1      |                                                          |
| 29.6379 | 30.434  | 29.7602 | 29.8879 | 30.0761 | 29.8176 | 29.1764 | 29.9582 | 28.7171 |         | 29.2738 | 28.9037 | 28.9314 | P09496-2;P09496 P09496-2;P09496 Clathrin light chain CLTA      |                                                          |
| 29.2642 | 29.3993 | 29.1049 | 28.9775 | 29.0071 | 28.9548 | 28.6958 | 29.0968 | 27.5023 |         | 29.2927 | 28.539  | 28.1862 | P09497-2;P09497 P09497-2;P09497 Clathrin light chain CLTB      |                                                          |
| 33.1116 | 32.7947 | 33.0981 | 33.3934 | 32.85   | 33.2437 | 32.6044 | 32.2057 | 32.4301 |         | 32.7589 | 32.164  | 32.2568 | Q00610;Q00610- Q00610;Q00610-2 Clathrin heavy chain CLTC       |                                                          |
| 25.8156 | 25.9262 | 24.9831 | 24.6827 | 25.2836 | 24.6098 | 27.7149 | 26.5409 | 27.1276 |         | 27.2646 | 26.579  | 25.9597 | P10909;P10909-4 P10909;P10909-4; Clusterin;Clusterin CLU       |                                                          |
| NaN     | NaN     | NaN     | NaN     | NaN     | NaN     | 22.5313 | NaN     | NaN     | NaN     | NaN     | NaN     | NaN     | I3L2B0;I3L4B5;I3L I3L2B0 CLUH                                  |                                                          |
| 27.4754 | 25.9109 | 26.2963 | 27.1606 | 26.3036 | 26.1984 | 26.309  | 26.5148 | 26.1536 |         | 26.5177 | 26.5995 | 26.3944 | K7EIG1;O75153;Q K7EIG1;O75153 Clustered mitochondrion CLUH     |                                                          |
| 24.3348 | NaN     | Q8NFW8;Q8NFW; Q8NFW8;Q8NFW; N-acylneuraminat CMAS              |                                                          |
| 23.9146 | 24.3074 | 23.6538 | 23.2877 | 24.4459 | 23.433  | 25.5754 | 24.0809 | NaN     |         | 24.246  | 24.4959 | 24.4178 | Q96DG6 Q96DG6 Carboxymethylated CMBL                           |                                                          |
| NaN     | 23.9205 | NaN     | Q7Z7K0;H7C3D8 Q7Z7K0;H7C3D8 COX assembly mit CMC1              |                                                          |
| 23.2713 | 23.3164 | 23.0882 | NaN     | 22.8986 | NaN     |         | 23.24   | NaN     |         | 23.6708 | NaN     | 23.5775 | Q8IY22;Q8IY22-2; Q8IY22;Q8IY22-2; C-Maf-inducing protein CMIP  |                                                          |
| 27.736  | 28.1121 | 27.7401 | 27.5011 | 27.786  | 27.8208 | 27.9332 | 27.8455 | 28.0392 |         | 27.9785 | 27.6266 | 27.9835 | P30085;Q5T0D2;F P30085;Q5T0D2 UMP-CMP kinase CMPK1             |                                                          |
| 25.4568 | 24.3994 | 24.6873 | 25.7529 | 24.4101 | 24.8001 | NaN     | NaN     | NaN     |         | 24.0334 | 24.4659 | NaN     | Q9BQ75;Q9BQ75- Q9BQ75;Q9BQ75- Protein CMSS1 CMSS1              |                                                          |
| 24.25   | NaN     | 24.6235 | 24.6164 | 24.7781 | 24.5027 | NaN     | H3BUD5;Q96MX0 H3BUD5;Q96MX0 CKLF-like MARVEL CMTM3             |                                                          |
| 23.7515 | NaN     | NaN     | 23.7524 | NaN     | NaN     | NaN     | NaN     | NaN     |         | 23.8928 | 24.0245 | NaN     | Q8IZR5-3;Q8IZR5- Q8IZR5-3;Q8IZR5- CKLF-like MARVEL CMTM4       |                                                          |
| 26.3437 | 26.6249 | 27.4587 | 27.4026 | 26.9771 | 27.3925 | 26.7827 | NaN     | 27.7331 |         | 27.0688 | 27.277  | 27.9016 | Q9NX76 Q9NX76 CKLF-like MARVEL CMTM6                           |                                                          |
| NaN     | NaN     | NaN     | 26.6391 | NaN     | Q96FZ5;F8WDZ3; Q96FZ5;F8WDZ3; CKLF-like MARVEL CMTM7           |                                                          |
| 26.6171 | 24.5336 | 25.1048 | 25.9056 | 25.6315 | 25.7687 | 23.5552 | 23.2737 | 22.8003 |         | 26.3095 | 25.057  | 24.155  | Q8N1G2;Q5T7F5; Q8N1G2 Cap-specific mRNA CMTM1                  |                                                          |
| 27.4164 | 27.9502 | 27.2528 | 26.8307 | 27.506  | 27.2196 | 27.6773 | 27.6676 | 27.8314 |         | 27.4724 | 27.2883 | 28.1718 | Q96KP4;Q96KP4-; Q96KP4;Q96KP4-; Cytosolic non-spe CNDP2        |                                                          |
| NaN     | H3BN40;Q8N9A8- H3BN40;Q8N9A8- Nuclear envelope CNEP1R1         |                                                          |
| NaN     | NaN     | NaN     | NaN     | NaN     | NaN     |         | 24.0065 | NaN     | NaN     | NaN     | NaN     | NaN     | A6NLH6;Q9P003 A6NLH6;Q9P003 Protein cornichon CNIH4            |                                                          |
| NaN     |         | 21.018  | NaN     | NaN     | Q6P9H4;Q8WXI2; Q6P9H4;Q8WXI2; Connector enhancer CNKSR3;CNKSR2 |                                                          |
| 27.2695 | 27.0097 | 27.5744 | 27.5401 | 27.0738 | 27.8199 | 26.8818 | NaN     |         | 26.2708 | 27.6741 | 27.0394 | 27.1002 | Q99439;B4DDF4;f Q99439;B4DDF4;f Calponin-2;Calpor CNN2         |                                                          |
| 28.6129 | 29.4312 | 29.2575 | 29.0688 | 29.1176 | 29.5245 | 28.767  | 28.5662 | 28.4444 |         | 28.9574 | 29.3655 | 29.3794 | Q15417;Q15417-; Q15417;Q15417-; Calponin-3;Calpor CNN3         |                                                          |
| 22.0767 | 22.3962 | 22.5009 | 22.3766 | 22.601  | 23.2122 | NaN     | Q9H8M5;Q9H8M- Q9H8M5;Q9H8M- Metal transporter CNNM2            |                                                          |
| 23.8623 | 23.5518 | 24.3558 | 24.1599 | 23.6407 | 24.3183 | 23.8273 | 24.9778 | 24.3019 |         | 25.0599 | 24.9078 | 24.3153 | Q8NE01;Q8NE01- Q8NE01;Q8NE01- Metal transporter CNNM3          |                                                          |
| 23.1164 | 23.1009 | 23.8104 | 23.5252 | 23.9339 | 24.342  | 23.1152 | NaN     | 23.8123 |         | 24.133  | 24.0724 | 24.4092 | Q6P4Q7;Q6P4Q7- Q6P4Q7;Q6P4Q7- Metal transporter CNNM4          |                                                          |
| 26.7334 | 25.3176 | 25.7957 | 26.3043 | 25.574  | 25.9134 | 25.5713 |         | 26.0265 | 25.6686 | 25.8644 | 25.999  | 25.6497 | AS5YKK6;AS5YKK6-2 AS5YKK6;AS5YKK6-2 CCR4-NOT transcr CNOT1     |                                                          |
| 23.2654 | NaN     | 22.698  | 23.0993 | 22.7388 | NaN     | NaN     | NaN     | 22.6353 | NaN     | 22.8617 | 23.0566 | NaN     | Q9H9A5;Q9H9A5- Q9H9A5;Q9H9A5- CCR4-NOT transcr CNOT10          |                                                          |
| NaN     | NaN     | NaN     | 21.1678 | NaN     | Q9UKZ1 Q9UKZ1 CCR4-NOT transcr CNOT11                          |                                                          |
| 22.6397 | 23.1095 | 23.386  | 22.5921 | 22.7246 | NaN     | NaN     |         | 24.0262 | NaN     | NaN     | NaN     | NaN     | Q9NZN8;F8VV52; Q9NZN8;F8VV52; CCR4-NOT transcr CNOT2           |                                                          |
| 23.7984 | NaN     | 23.5399 | 23.5331 | 23.9421 | 24.15   | NaN     | NaN     | 23.8353 | NaN     | 23.8223 | 24.0463 | NaN     | O75175;H7C3F5;C O75175;H7C3F5;C CCR4-NOT transcr CNOT3         |                                                          |
| NaN     | NaN     | NaN     | 21.0386 | NaN     | Q96LI5;Q9ULM6;f Q96LI5;Q9ULM6;f CCR4-NOT transcr CNOT6L;CNOT6  |                                                          |
| 23.7409 | 23.6027 | 23.6946 | 23.7897 | 23.8    | 23.7147 | 23.4    | 24.5153 | 23.7795 | NaN     |         | 23.6084 | NaN     | Q9UIV1;Q9UIV1-2 Q9UIV1;Q9UIV1-2 CCR4-NOT transcr CNOT7         |                                                          |
| 29.6697 | 29.4438 | 29.9684 | 29.67   | 29.4449 | 30.0767 | 30.245  | 29.2741 | 29.2524 |         | 30.8164 | 30.2556 | 30.005  | P09543;P09543-2 P09543;P09543-2 2,3-cyclic-nucleoti CNP        |                                                          |
| 23.6122 | 25.1383 | 24.2324 | 23.8855 | 25.3887 | NaN     |         | 24.6473 | 26.1199 |         | 25.6552 | 24.8424 | 24.849  | 24.7633                                                        | Q9Y2B0;F8VXJ7;F Q9Y2B0;F8VXJ7;F Protein canophy hc CNPY2 |
| 23.2949 | 23.7229 | NaN     | 23.2778 | 24.013  | NaN     |         | 23.6751 | NaN     | 24.2128 | NaN     | NaN     | NaN     | Q9BT09;A0A0C4D Q9BT09 Protein canophy hc CNPY3                 |                                                          |
| NaN     | NaN     | 22.5045 | NaN     | 23.3564 | NaN     | NaN     | NaN     | NaN     | NaN     | NaN     | 22.7759 | NaN     | Q9Y2R0;K7EPV0 Q9Y2R0;K7EPV0 Cytochrome c oxidase COA3          |                                                          |
| 26.8795 | 26.6713 | 26.4199 | 26.8679 | 26.7305 | 26.3394 | 25.7469 | NaN     | 25.7543 |         | 26.3209 | 26.2219 | 26.0743 | Q13057;Q13057- Q13057;Q13057-2 Bifunctional coenzyme COASY     |                                                          |
| NaN     | NaN     | NaN     | NaN     | 22.3594 | NaN     | Q535F7;A0A0B4J1 Q535F7;A0A0B4J1 Cordon-bleu prote COBL1        |                                                          |
| 24.7216 | 23.7406 | 24.4865 | 24.8804 | 24.6348 | 24.4725 | NaN     | NaN     | 23.9201 |         | 23.9626 | 24.1195 | NaN     | Q8WWTW3;A0A087 Q8WWTW3;A0A087 Conserved oligom COG1            |                                                          |
| 22.9578 | NaN     | 23.4347 | 23.8643 | NaN     | NaN     | NaN     | NaN     | NaN     |         | 23.6352 | 23.1803 | NaN     | Q14746;Q14746- Q14746;Q14746-2 Conserved oligom COG2           |                                                          |
| 25.1085 | 24.7943 | 24.4702 | 24.855  | 24.9412 | 23.814  | NaN     | NaN     | NaN     |         | 24.2745 | 24.245  | 24.4268 | Q96JB2;Q96JB2-2 Q96JB2 Conserved oligom COG3                   |                                                          |
| 25.4073 | NaN     | 23.7064 | 24.8251 | 24.2109 | 24.3642 | NaN     | NaN     | 23.3973 |         | 24.0224 | NaN     | 23.3973 | Q9H9E3;A0A0A0 Q9H9E3;A0A0A0 Conserved oligom COG4              |                                                          |
| 24.824  | 23.85   | 24.0133 | 24.8606 | 23.5497 | 23.9683 | 23.2241 | NaN     | NaN     |         | 24.2096 | 23.8713 | NaN     | Q9UP83;Q9UP83- Q9UP83;Q9UP83- Conserved oligom COG5            |                                                          |
| 25.2074 | 23.6015 | 24.4713 | 24.8735 | 24.2251 | 24.3698 | NaN     | NaN     | NaN     |         | 23.8626 | 23.8339 | NaN     | Q9Y2V7;Q9Y2V7-; Q9Y2V7;Q9Y2V7-; Conserved oligom COG6          |                                                          |
| 24.1601 | 23.8014 | 23.8085 | 24.3705 | 23.6363 | 23.5092 | NaN     | NaN     | NaN     |         | 23.4143 | NaN     | NaN     | P83436 P83436 Conserved oligom COG7                            |                                                          |
| 22.2877 | NaN     | 22.6797 | 23.816  | 23.3253 | 22.8156 | NaN     | NaN     | NaN     |         | 22.3175 | 22.5584 | NaN     | Q96MW5;H3BQV Q96MW5;H3BQV Conserved oligom COG8                |                                                          |
| 24.4574 | 25.5423 | 25.2842 | 24.4722 | 25.3389 | 25.4466 | 25.1025 | NaN     | NaN     | NaN     | NaN     | 24.6518 | NaN     | P38432 P38432 Coilin COIL                                      |                                                          |
| 25.6495 | NaN     | 22.4539 | 23.7472 | 22.2767 | 22.1745 | 23.9181 | NaN     | NaN     | NaN     | NaN     | NaN     | NaN     | Q99715;D6RGG3; Q99715;D6RGG3; Collagen alpha-1(C) COL12A1      |                                                          |
| 25.572  | 24.6793 | 25.025  | 25.1298 | 24.4563 | 24.8813 | 24.2428 | 25.3994 | 24.9795 |         | 24.11   | 24.1707 | NaN     | Q5TAT6;Q5TAT6- Q5TAT6;Q5TAT6- Collagen alpha-1(C) COL13A1      |                                                          |
| 22.8725 | 24.5954 | 25.4631 | 21.4726 | 22.3394 | 24.0401 | 29.028  | 28.708  | 26.2272 |         | 26.0686 | 25.0877 | 24.8819 | P39060;P39060-2 P39060;P39060-2; Collagen alpha-1(C) COL18A1   |                                                          |
| NaN     | 24.9093 | NaN     | NaN     | 23.6734 | NaN     | 24.5763 | 24.5118 | NaN     | NaN     | NaN     | NaN     | NaN     | P08123;A0A087W P08123;A0A087W Collagen alpha-2(I) COL1A2       |                                                          |
| NaN     | NaN     | NaN     | NaN     | NaN     | NaN     | 25.3486 | NaN     | NaN     |         | 22.9381 | NaN     | NaN     | P08572 P08572 Collagen alpha-2(I) COL4A2                       |                                                          |



|     |         |         |         |         |         |         |         |         |         |         |         |         |                                                                  |                                                             |
|-----|---------|---------|---------|---------|---------|---------|---------|---------|---------|---------|---------|---------|------------------------------------------------------------------|-------------------------------------------------------------|
|     | 23.345  | 23.7122 | 23.4134 | 23.1272 | 23.2901 | 22.9458 | 23.9724 | 23.6957 | 22.9799 | 23.7117 | NaN     |         | 23.727                                                           | Q9Y5P4;Q9Y5P4-; Q9Y5P4;Q9Y5P4-2 Collagen type IV a COL4A3BP |
|     | 23.5862 | 24.5925 | 25.6594 | 22.9757 | 23.3069 | 24.7828 | 24.9191 | 25.9253 | 24.5096 | NaN     | NaN     | NaN     | P20908;A0A087W P20908;A0A087W Collagen alpha-1( COL5A1           |                                                             |
|     | 24.3131 | 26.8504 | 24.0512 | 23.856  | 26.0996 | 24.4367 | 28.6233 | 27.8667 | 27.2159 |         | 25.972  | 25.0341 | 25.7425                                                          | P12109;A0A087X( P12109;A0A087X( Collagen alpha-1( COL6A1    |
| NaN | NaN     | NaN     | NaN     | NaN     | NaN     | NaN     | 25.3297 | NaN     | NaN     | NaN     | NaN     | NaN     | P12110;P12110-3 P12110;P12110-3; Collagen alpha-2( COL6A2        |                                                             |
|     | 26.6933 | 24.3732 | 25.9797 | 26.1863 | 23.6444 | 24.6544 | 27.1417 | 25.8913 | NaN     | 26.1276 | 23.2444 | NaN     | P27658;A0A087W P27658;A0A087W Collagen alpha-1( COL8A1           |                                                             |
|     | 27.3298 | 27.6523 | 27.4168 | 27.2186 | 27.7041 | 27.5134 | 26.8724 | 27.5145 | 28.0238 | 27.224  | 27.2722 | 27.1866 | Q8NBJS;MQQYH0 Q8NBJS Procollagen galact COLGALT1                 |                                                             |
|     | 22.1372 | 22.1404 | 22.3763 | 22.652  | 22.8443 | NaN     | 22.0364 | NaN     | 22.6522 | 23.1157 | 22.9302 | 22.4465 | Q86X83;Q86X83-; Q86X83;Q86X83-2 COMM domain-cc COMMD2            |                                                             |
| NaN | NaN     | NaN     | NaN     | 22.754  | NaN     | NaN     | NaN     | NaN     | NaN     | 22.6871 | 22.8693 | NaN     | R4GMX3;Q9UB1; R4GMX3;Q9UB1; COMM domain-cc COMMD3-BMI1;C         |                                                             |
|     | 22.2634 | NaN     | Q9H0A8;A0A0B4J Q9H0A8;A0A0B4J COMM domain-cc COMMD4              |                                                             |
|     | 22.0258 | NaN     | 21.4915 | NaN     | 21.6158 | NaN     | NaN     | NaN     | NaN     | 21.7796 | NaN     | NaN     | Q9GZQ3;H0YEQ6 Q9GZQ3;H0YEQ6 COMM domain-cc COMMD5                |                                                             |
|     | 22.5361 | NaN     | 22.7843 | 22.4233 | NaN     | 22.3258 | NaN     | NaN     | NaN     | 22.5821 | NaN     | NaN     | Q7Z4G1;Q7Z4G1- Q7Z4G1;Q7Z4G1- COMM domain-cc COMMD6              |                                                             |
|     | 23.7622 | 23.5591 | 23.1489 | 24.3266 | 23.528  | 23.8308 | NaN     | NaN     | NaN     | 23.9262 | NaN     | NaN     | Q9NX08 Q9NX08 COMM domain-cc COMMD8                              |                                                             |
|     | 22.718  | 22.5801 | 22.3341 | NaN     | 22.664  | NaN     | Q9P000;Q9P000-; Q9P000;Q9P000-2 COMM domain-cc COMMD9            |                                                             |
|     | 25.355  | 24.8171 | 24.9064 | 24.8061 | 24.8263 | 25.3141 | 25.2862 | 25.23   | 24.3677 | 24.7052 | 24.6223 | 24.3103 | P21964;P21964-2 P21964;P21964-2; Catechol O-methyl COMT          |                                                             |
|     | 30.4994 | 29.6332 | 30.2449 | 30.4819 | 29.9383 | 30.4064 | 29.7044 | 30.0188 | 29.7831 | 30.3704 | 30.1796 | 29.7646 | P53621;P53621-2 P53621;P53621-2 Coatomer subunit COPA            |                                                             |
|     | 30.6837 | 29.5862 | 30.1517 | 30.6807 | 29.824  | 30.2367 | 29.5599 | 29.3174 | 29.192  | 29.8267 | 29.5059 | 28.9552 | P53618;E9PP73;E P53618 Coatomer subunit COPB1                    |                                                             |
|     | 29.7598 | 29.4128 | 29.5085 | 29.5618 | 29.3304 | 29.5072 | 29.3962 | 29.5208 | 29.1257 | 29.654  | 29.431  | 29.1578 | P35606;P35606-2 P35606;P35606-2 Coatomer subunit COPB2           |                                                             |
|     | 28.1016 | 27.8776 | 27.9081 | 27.7361 | 27.4982 | 27.7886 | 27.7469 | 27.7481 | 27.2047 | 27.5435 | 27.6867 | 27.3514 | O14579;MOQXB4; O14579;MOQXB4; Coatomer subunit COPE              |                                                             |
|     | 30.2963 | 29.6229 | 30.0069 | 30.1499 | 29.7188 | 30.1806 | 29.3629 | 29.7542 | 29.574  | 29.7601 | 29.8086 | 29.6856 | Q9Y678;H0Y8X7;C Q9Y678 Coatomer subunit COGP1                    |                                                             |
|     | 27.6137 | 26.6672 | 27.2395 | 27.4492 | 26.9841 | 27.3601 | 26.1892 | 26.6773 | 26.6125 | 27.0945 | 26.9051 | 26.8422 | Q9UBF2;Q9UBF2- Q9UBF2;Q9UBF2- Coatomer subunit COGP2             |                                                             |
|     | 26.7273 | 26.1402 | 26.6683 | 26.7392 | 26.4276 | 26.9308 | 26.1166 | 26.6893 | 26.2525 | 26.4705 | 26.7599 | 26.6576 | P61201;P61201-2 P61201;P61201-2 COP9 signalosome COP52           |                                                             |
|     | 26.4947 | 26.0586 | 26.0763 | 26.3814 | 26.3077 | 26.1838 | 26.0831 | 25.7949 | 26.2298 | 25.9553 | 26.3921 | 26.1498 | Q9UN52;Q9UN52 Q9UN52;Q9UN52 COP9 signalosome COP53               |                                                             |
|     | 26.8608 | 27.3116 | 26.9995 | 26.9547 | 27.3481 | 27.1086 | 27.0515 | 27.4262 | 27.0813 | 27.1151 | 27.2682 | 27.2686 | Q9BT78;D6RFN0;I Q9BT78;D6RFN0;I COP9 signalosome COP54           |                                                             |
|     | 24.9461 | 25.1635 | 24.8987 | 24.8906 | 24.8014 | 24.8896 | 24.9507 | 25.6026 | 24.7756 | 25.0367 | 25.1845 | 25.2221 | Q92905;E5RHH5;f Q92905;E5RHH5 COP9 signalosome COP55             |                                                             |
|     | 26.2131 | 25.6638 | 25.8821 | 25.9566 | 25.7063 | 25.6896 | 24.6248 | 25.1548 | 25.7814 | 25.9201 | 26.06   | 25.8549 | Q7L5N1;E7EM64;I Q7L5N1;E7EM64 COP9 signalosome COP56             |                                                             |
|     | 25.2737 | 25.2205 | 24.9133 | 25.4835 | 24.8319 | 24.8371 | NaN     | NaN     | NaN     | 24.2123 | NaN     | 24.088  | Q9UBW8;F5H7C6 Q9UBW8;F5H7C6 COP9 signalosome COP57A              |                                                             |
| NaN | NaN     | NaN     | NaN     | 23.2902 | NaN     | Q9H9Q2;J3KQ34;I Q9H9Q2;J3KQ34;I COP9 signalosome COP57B          |                                                             |
|     | 25.2426 | 25.5007 | 25.0721 | 25.3069 | 25.3265 | 25.07   | 24.4228 | 24.8085 | 24.4176 | 24.9975 | 24.9374 | 24.8805 | Q99627;E9PGT6;C Q99627;E9PGT6;C COP9 signalosome COP58           |                                                             |
|     | 27.038  | 27.4642 | 27.7332 | 27.999  | 27.3346 | 27.7266 | 26.9289 | 26.8636 | 25.7661 | 27.8937 | 27.263  | 26.2057 | P61923;F8VVA7;P P61923;F8VVA7;P Coatomer subunit COPZ1           |                                                             |
| NaN | NaN     | NaN     | NaN     | 20.837  | NaN     | Q5HYK3;F8VXX6;f Q5HYK3;F8VXX6;f 2-methoxy-6-poly COQ5            |                                                             |
|     | 22.3367 | 22.7818 | 22.5954 | 22.4142 | 23.982  | NaN     | 22.9007 | NaN     | NaN     | 22.7372 | 22.5784 | NaN     | P31146;H3BR3Y;f P31146;H3BR3Y Coronin-1A;Coron CORO1A            |                                                             |
|     | 27.6893 | 28.2243 | 28.202  | 27.5984 | 28.3373 | 28.5046 | 28.4308 | 28.2364 | 28.2997 | 28.5198 | 28.5983 | 28.5314 | Q9BR76;A0A087V Q9BR76;A0A087V Coronin-1B;Coron CORO1B            |                                                             |
|     | 30.079  | 30.583  | 30.7008 | 30.2526 | 30.7045 | 30.7441 | 30.6886 | 30.5068 | 30.1885 | 31.1908 | 31.1467 | 30.7379 | Q9ULV4;Q9ULV4- Q9ULV4;Q9ULV4- Coronin-1C;Coron CORO1C            |                                                             |
|     | 22.8125 | 22.4615 | 22.6684 | 22.6222 | NaN     | NaN     | NaN     | NaN     | NaN     | NaN     | 22.0779 | NaN     | Q92828 Q92828 Coronin-2A CORO2A                                  |                                                             |
|     | 24.1329 | 23.6684 | 23.6434 | 23.8391 | 23.623  | 23.6767 | 23.3498 | NaN     | NaN     | 23.8215 | 23.042  | NaN     | Q9UQ03;Q9UQ03 Q9UQ03;Q9UQ03 Coronin-2B CORO2B                    |                                                             |
|     | 26.3534 | 25.7065 | 26.0083 | 26.2236 | 25.8977 | 26.1228 | 25.5297 | 25.4786 | 25.961  | 25.9175 | 26.2961 | 25.9608 | P57737;A0A0A6Y P57737;A0A0A6Y Coronin-7;Coronin CORO7;CORO7-PA   |                                                             |
|     | 29.7943 | 29.6524 | 29.9496 | 29.6835 | 29.5094 | 29.9875 | 29.8293 | 28.6366 | 28.7583 | 30.7445 | 30.0598 | 29.4297 | Q14019;H3BT58 Q14019;H3BT58 Coactosin-like pro COTL1             |                                                             |
|     | 26.4944 | 27.0905 | 26.6298 | 26.8471 | 26.8586 | 26.8248 | 26.0262 | 27.2509 | 27.923  | 25.4815 | 26.2391 | 26.6883 | P13073;H3BN72;f P13073;H3BN72;f Cytochrome c oxid COX4I1         |                                                             |
|     | 26.1226 | 27.5337 | 26.9925 | 26.844  | 27.4656 | 27.1238 | 26.3052 | 28.4383 | 29.1288 | 25.8711 | 26.796  | 27.6688 | P20674;H3BNX8;f P20674;H3BNX8;f Cytochrome c oxid COX5A          |                                                             |
|     | 25.1726 | 26.5641 | 25.8703 | 25.6326 | 26.6596 | 25.9948 | 25.2795 | 27.7533 | 27.9677 | 25.0417 | 26.0433 | 26.6822 | P10606 P10606 Cytochrome c oxid COX5B                            |                                                             |
| NaN | NaN     | NaN     | 23.8419 | NaN     | NaN     | 24.4058 | NaN     | NaN     | NaN     | NaN     | NaN     | NaN     | P12074 P12074 Cytochrome c oxid COX6A1                           |                                                             |
|     | 24.1188 | NaN     | NaN     | 24.6936 | 23.8245 | NaN     | 23.178  | NaN     | NaN     | NaN     | NaN     | NaN     | P14854;K7EQD3 P14854 Cytochrome c oxid COX6B1                    |                                                             |
|     | 25.0563 | 25.8864 | 25.7017 | 25.78   | 26.1825 | 25.9781 | 24.4014 | 25.907  | 26.4232 | 24.3963 | 25.1005 | 25.0473 | P09669 P09669 Cytochrome c oxid COX6C                            |                                                             |
| NaN | NaN     | 24.2486 | 23.5967 | NaN     | 23.7331 | 24.0641 | 23.7786 | 24.721  | 24.9    | NaN     | NaN     | 23.8471 | P14406;D6RIE3;D P14406;D6RIE3;D Cytochrome c oxid COX7A2         |                                                             |
|     | 22.0642 | NaN     | NaN     | 21.9351 | NaN     | O14548;E5RJZ1;H O14548;E5RJZ1;H Cytochrome c oxid COX7A2L        |                                                             |
|     | 23.8883 | 24.2788 | 23.8111 | 24.2452 | 24.0863 | 24.0227 | 24.0887 | NaN     | 24.6051 | NaN     | NaN     | 23.7422 | P15954;D6R9Z7 P15954;D6R9Z7 Cytochrome c oxid COX7C              |                                                             |
|     | 26.1776 | 26.6012 | 26.9803 | 25.9724 | 26.7062 | 26.6672 | 25.8629 | 25.357  | 26.6999 | 25.3529 | 24.6561 | 24.731  | O75976;O75976-2 O75976;O75976-2 Carboxypeptidase CPD             |                                                             |
| NaN | NaN     | 21.144  | NaN     | E5RFP2;Q17RY0-3 E5RFP2;Q17RY0-3 Cytoplasmic poly CPEB4;CPEB3;CPE |                                                             |
|     | 30.273  | 30.1354 | 30.14   | 29.9768 | 30.3393 | 30.2023 | 30.3758 | 30.6524 | 30.4379 | 30.8781 | 30.7731 | 30.7764 | Q99829;B0QZ18;f Q99829;B0QZ18;f Copine-1 CPNE1                   |                                                             |
|     | 24.9042 | 25.3495 | 24.9338 | 25.0029 | 25.1563 | NaN     | 25.946  | 24.2728 | NaN     | 25.7272 | 25.0996 | 25.2434 | Q96FN4;Q96FN4- Q96FN4;Q96FN4- Copine-2 CPNE2                     |                                                             |
|     | 29.2708 | 28.6308 | 28.7236 | 29.26   | 28.4153 | 28.6888 | 28.5646 | 28.04   | 27.7001 | 29.0572 | 28.4244 | 27.9856 | O75131;A0A087W O75131;A0A087W Copine-3 CPNE3                     |                                                             |
|     | 23.9373 | 24.045  | 23.7239 | 23.4799 | 23.196  | 23.4149 | 23.8279 | 24.2815 | 24.1337 | 23.8826 | NaN     | 23.7906 | Q86YQ8;E7ENV7;f Q86YQ8;E7ENV7;f Copine-8 CPNE8                   |                                                             |
|     | 25.0059 | 26.0367 | 25.1585 | 24.8992 | 25.8276 | 24.9977 | 25.2248 | 25.9483 | 26.6095 | 24.902  | 25.6009 | 26.1583 | P36551;H0YA22;P P36551 Oxygen-dependent CPOX                     |                                                             |
|     | 23.0406 | NaN     | NaN     | 22.1714 | NaN     | NaN     | 23.5608 | NaN     | NaN     | NaN     | NaN     | NaN     | Q9BRF8;Q9BRF8-; Q9BRF8;Q9BRF8- Serine/threonine- CPPE1           |                                                             |
|     | 25.3646 | NaN     | 28.8749 | NaN     | 28.2139 | NaN     | NaN     | NaN     | NaN     | NaN     | NaN     | 24.602  | P31327;P31327-3 P31327;P31327-3; Carbamoyl-phosph CP51           |                                                             |
|     | 26.046  | 25.1305 | 25.3681 | 25.9955 | 25.5922 | 25.5364 | 24.2463 | NaN     | 24.0579 | 25.7364 | 25.9178 | 25.5    | O10570;A0A087X O10570 Cleavage and poly CP5F1                    |                                                             |
|     | 23.9207 | NaN     | 23.8169 | 24.2192 | 23.6505 | 23.9334 | NaN     | NaN     | NaN     | 23.5664 | 23.657  | 23.6155 | Q9P210;H0YJF4 Q9P210 Cleavage and poly CP5F2                     |                                                             |
|     | 24.7401 | 24.1581 | 24.215  | 24.7231 | 24.0799 | 24.4292 | NaN     | NaN     | NaN     | 23.9692 | 24.2902 | 24.3992 | Q9UKF6;G5E9W3 Q9UKF6;G5E9W3 Cleavage and poly CP5F3              |                                                             |
|     | 22.6151 | NaN     | 22.0167 | 23.2286 | 22.0388 | 22.6158 | NaN     | NaN     | NaN     | 22.1782 | NaN     | NaN     | Q5TA45;Q5TA45-; Q5TA45;Q5TA45- Integrator complex CP5F3L         |                                                             |
|     | 24.9723 | 24.5183 | 24.459  | 24.9965 | 24.7367 | 24.5255 | 24.2298 | NaN     | NaN     | 24.6005 | 24.7554 | 24.8479 | Q16630;Q16630-; Q16630;Q16630-2 Cleavage and poly CP5F6          |                                                             |



|     |         |         |         |         |         |         |         |         |         |         |         |         |                                                                      |
|-----|---------|---------|---------|---------|---------|---------|---------|---------|---------|---------|---------|---------|----------------------------------------------------------------------|
|     | 25.6071 | 25.3767 | 25.228  | 25.2738 | 25.3117 | 25.113  | 23.8458 | NaN     | 24.498  | 25.4724 | 25.9193 | 25.4186 | Q8N684;F5H669;C Q8N684;F5H669;C Cleavage and poly CPSF7              |
|     | 22.0818 | NaN     | NaN     | 23.0266 | NaN     | NaN     | NaN     | NaN     | 23.6678 | 22.1877 | NaN     | NaN     | P50416;P50416-2 P50416;P50416-2 Carnitine O-palmi CPT1A              |
|     | 24.4603 | 23.0775 | 23.7914 | 24.6843 | 23.6044 | 24.0893 | NaN     | NaN     | NaN     | 23.6655 | 23.1548 | NaN     | P23786 P23786 Carnitine O-palmi CPT2                                 |
|     | 23.4828 | NaN     | Q9BSW2-2;Q9BSV Q9BSW2-2;Q9BSV EF-hand calcium-t CRACR2A              |
| NaN | NaN     | NaN     | NaN     | NaN     | NaN     | NaN     | NaN     | NaN     | NaN     | NaN     | 21.6349 | NaN     | P43155;P43155-2 P43155;P43155-2 Carnitine O-acetyl CRAT              |
| NaN | NaN     | NaN     | NaN     | NaN     | NaN     | NaN     | NaN     | NaN     | NaN     | NaN     | 22.1517 | NaN     | Q96SW2;Q96SW2 Q96SW2;Q96SW2 Protein cereblon CRBN                    |
|     | 24.5531 | 24.7225 | 23.7742 | 23.5322 | 23.6136 | NaN     | NaN     | NaN     | 24.8569 | 22.9506 | 22.7988 | NaN     | Q9NZV1 Q9NZV1 Cysteine-rich mot CRIM1                                |
|     | 25.2952 | 25.912  | 26.6126 | 25.8733 | 25.9358 | 26.7121 | NaN     | NaN     | NaN     | 23.7197 | NaN     | NaN     | P52943;P52943-2 P52943;P52943-2 Cysteine-rich prot CRIP2             |
| NaN | NaN     | 24.0398 | 23.7936 | NaN     | 24.1713 | 23.7655 | NaN     | NaN     | NaN     | NaN     | NaN     | NaN     | Q9H0B8;H3BT10;f Q9H0B8;H3BT10;f Cysteine-rich secr CRISPLD2          |
|     | 26.2927 | 26.9672 | 26.6598 | 25.8931 | 26.6897 | 26.228  | 26.4021 | 26.629  | 26.5441 | 26.0968 | 25.9767 | 26.5207 | P46108;I3L297 P46108 Adapter molecule CRK                            |
| NaN | NaN     | NaN     | NaN     | NaN     | 23.5443 | NaN     | P46108-2 P46108-2 Adapter molecule CRK                               |
|     | 25.7198 | 26.1793 | 26.2742 | 25.7276 | 26.2561 | 26.3054 | 26.0423 | 25.7932 | 25.8167 | 26.3537 | 26.1946 | 26.2198 | P46109 P46109 Crk-like protein CRKL                                  |
|     | 23.167  | NaN     | NaN     | 23.4566 | 23.7337 | NaN     | Q8IUI8;Q8IUI8-2;J Q8IUI8;Q8IUI8-2 Cytokine receptor CRLF3            |
|     | 25.8251 | 24.1578 | 24.9022 | 25.9087 | 24.3113 | 24.1649 | NaN     | NaN     | NaN     | 24.9764 | 24.6358 | 23.6541 | Q9BZJ0;Q5JY65;Q Q9BZJ0;Q5JY65;Q Crooked neck-like CRNKL1             |
|     | 25.2363 | 25.3533 | 25.2779 | 25.0643 | 25.3611 | 25.2802 | 25.7741 | 26.1946 | 26.0461 | 25.7188 | 25.0958 | 25.0206 | O75718;C9JP16 O75718;C9JP16 Cartilage-associat CRTAP                 |
|     | 24.6316 | 24.8916 | 24.3291 | 23.9447 | 24.2215 | 24.2758 | 25.3854 | 25.4745 | 25.243  | 25.6214 | 25.6197 | NaN     | Q08257;Q08257-3 Q08257;Q08257-3 Quinone oxidored CRYZ                |
|     | 24.3841 | 24.9849 | 24.6357 | 24.344  | 24.9736 | 24.3192 | 25.1017 | NaN     | NaN     | 24.6034 | 24.5991 | NaN     | O95825;A6NMA8 O95825;A6NMA8 Quinone oxidored CRYZL1                  |
|     | 27.7742 | 27.607  | 27.3559 | 27.5756 | 27.7371 | 27.4285 | 26.5796 | 27.2636 | 27.7352 | 27.3624 | 28.2845 | 27.4416 | O75390;B4DJV2;A O75390;B4DJV2;A Citrate synthase, i CS               |
|     | 29.6648 | 29.0825 | 29.1888 | 29.7367 | 29.1229 | 29.2126 | 28.6298 | 29.2405 | 28.5431 | 28.8393 | 29.055  | 28.6663 | O75534;O75534-2 O75534;O75534-2 Cold shock domain CSDE1              |
|     | 30.9199 | 30.2341 | 30.4772 | 30.725  | 30.3399 | 30.5704 | 30.5948 | 30.2493 | 30.2273 | 31.0563 | 30.885  | NaN     | P55060;P55060-3 P55060;P55060-3 Exportin-2 CSE1L                     |
|     | 23.6541 | 24.4042 | 23.5683 | 23.1315 | 23.5418 | 22.8145 | 26.2367 | 25.9867 | 23.1919 | 22.8487 | NaN     | 22.5789 | P09603;E9PIA2;P P09603;E9PIA2;P Macrophage color CSF1                |
|     | 23.0196 | NaN     | 22.605  | 22.4108 | NaN     | NaN     | NaN     | NaN     | NaN     | 23.3828 | 23.5411 | NaN     | P09919;J3QRX2;J P09919;J3QRX2;J Granulocyte color CSF3               |
|     | 27.381  | 26.6192 | 26.8083 | 27.0824 | 26.5425 | 26.6458 | 26.7919 | 26.3735 | 26.6509 | 27.9955 | 27.7703 | 26.8697 | P41240;H3BUM9;P P41240 Tyrosine-protein t CSK                        |
|     | 26.2636 | 25.4121 | 26.0403 | 26.3603 | 25.8724 | 26.2025 | 25.8765 | 26.0093 | 24.5976 | 25.9627 | 25.6765 | 25.5864 | P48729;P48729-3 P48729;P48729-3 Casein kinase I iso CSNK1A1          |
|     | 24.3209 | 22.708  | 23.4285 | 23.7537 | NaN     | 23.4076 | 22.9184 | NaN     | NaN     | NaN     | NaN     | NaN     | P49674;P48730;P P49674;P48730;P Casein kinase I iso CSNK1E;CSNK1D    |
|     | 20.3841 | NaN     | 23.0466 | 21.7056 | NaN     | 22.8574 | NaN     | NaN     | NaN     | 22.413  | 21.9109 | NaN     | Q9HCP0;U3KQA5; Q9HCP0;U3KQA5; Casein kinase I iso CSNK1G1;hCG_20     |
|     | 22.5649 | NaN     | 23.3518 | 22.7006 | NaN     | NaN     | NaN     | NaN     | NaN     | 23.7873 | NaN     | NaN     | P78368;K7ESB6;A P78368;K7ESB6 Casein kinase I iso CSNK1G2            |
| NaN | NaN     | NaN     | NaN     | 22.4325 | NaN     | Q9Y6M4 Q9Y6M4 Casein kinase I iso CSNK1G3                            |
|     | 26.6037 | 26.7893 | 27.255  | 26.9005 | 26.4932 | 27.3454 | 26.715  | 25.7959 | 26.3375 | 27.4568 | 27.0931 | 26.8917 | Q9Y6M4-3;Q9Y6M Q9Y6M4-3;Q9Y6M Casein kinase I iso CSNK1G3            |
|     | 29.4739 | 29.7338 | 29.2918 | 29.6121 | 29.5057 | 29.2673 | 29.4696 | 29.5117 | 29.4585 | 29.0453 | 29.5771 | 29.1595 | P68400;E7EU96;Q P68400;E7EU96;Q Casein kinase II iso CSNK2A1;CSNK2A  |
|     | 27.2488 | 27.2117 | 27.4015 | 27.7199 | 27.585  | 27.4285 | 27.8081 | 27.4974 | 27.4356 | 27.5747 | 27.6895 | 27.64   | P19784;H3BSA1;f P19784;H3BSA1 Casein kinase II iso CSNK2A2           |
|     | 28.1254 | 27.0218 | 27.5535 | 27.6881 | 27.0683 | 27.5057 | 27.7618 | 27.8681 | 26.1182 | 27.647  | 27.9125 | 26.5693 | P67870;Q5SRQ6;C P67870;Q5SRQ6;C Casein kinase II iso CSNK2B;CSNK2B-L |
|     | 25.3807 | 26.0216 | 25.7367 | 25.4883 | 26.009  | 25.7912 | 27.3271 | 26.2252 | 26.0163 | 27.5785 | 25.9719 | 25.8515 | Q6UVK1 Q6UVK1 Chondroitin sulfat CSPG4                               |
|     | 25.4639 | 25.5796 | NaN     | 25.1633 | NaN     | P21291;E9PS42;E P21291;E9PS42;E Cysteine and glyci CSRP1             |
|     | 23.9975 | 24.7678 | 24.4133 | 23.993  | 24.2026 | 24.3121 | 24.0707 | NaN     | NaN     | 24.5965 | 24.6556 | NaN     | Q16527;F8VQR7;f Q16527;F8VQR7;f Cysteine and glyci CSRP2             |
|     | 22.6841 | 24.3811 | 23.1753 | 22.756  | 23.4251 | 23.4391 | 29.9829 | 29.8925 | 28.2137 | 25.8285 | 25.7072 | 27.4382 | P01037 P01037 Cystatin-SN CST1                                       |
| NaN | NaN     | NaN     | NaN     | NaN     | NaN     | NaN     | 24.5417 | NaN     | NaN     | NaN     | NaN     | NaN     | P09228 P09228 Cystatin-SA CST2                                       |
|     | 25.8742 | 27.4036 | 25.9925 | 25.906  | 26.7335 | 26.1986 | 31.0177 | 30.368  | 28.9355 | 28.1644 | 27.7561 | 27.9576 | P01034 P01034 Cystatin-C CST3                                        |
| NaN | NaN     | 24.2458 | NaN     | NaN     | NaN     | NaN     | 28.2705 | 26.7824 | 26.1842 | 25.1253 | 24.2174 | 25.4111 | P01036 P01036 Cystatin-S CST4                                        |
|     | 26.7007 | 26.3965 | 26.1172 | 27.0637 | 26.3019 | 26.1088 | 27.1427 | 26.0093 | 26.2494 | 27.2712 | 26.8955 | 26.4016 | P04080 P04080 Cystatin-B CSTB                                        |
|     | 26.8203 | 26.9754 | 26.6611 | 26.9435 | 27.0882 | 26.7892 | 26.1985 | 26.9246 | 26.5692 | 26.5258 | 26.81   | 27.032  | Q05048;A0A0A0N Q05048;A0A0A0N Cleavage stimulat CSTF1                |
|     | 24.038  | 23.739  | 23.6444 | 24.2845 | 24.0962 | 24.1008 | NaN     | NaN     | 23.6769 | 23.7696 | 24.2008 | 24.8014 | P33240;E7EWR4;f P33240;E7EWR4;f Cleavage stimulat CSTF2              |
|     | 25.8099 | 25.0458 | 25.3263 | 25.6732 | 25.5547 | 25.62   | NaN     | 24.5123 | 24.8233 | 25.1213 | 25.0181 | NaN     | Q9H0L4 Q9H0L4 Cleavage stimulat CSTF2T                               |
|     | 25.4054 | 25.0941 | 25.3691 | 25.4401 | 25.3282 | 25.1465 | NaN     | NaN     | 24.6397 | 25.0357 | 25.0354 | 25.0878 | Q12996;E9PLP8;Q Q12996 Cleavage stimulat CSTF3                       |
|     | 22.4115 | NaN     | G3V599;O15320;C G3V599;O15320;C cTAGE family men CTAGE5;MIA2         |
|     | 25.3122 | 25.0236 | 25.1295 | 25.5082 | 25.4436 | 25.133  | 24.1926 | NaN     | 25.2291 | 25.5035 | 25.9236 | 25.8415 | Q13363;Q13363-2 Q13363;Q13363-2 C-terminal-bindin CTBP1              |
|     | 27.267  | 26.4373 | 26.7235 | 27.4703 | 27.0483 | 26.841  | 25.7238 | 25.8162 | 26.0849 | 27.3367 | 27.4895 | 26.7776 | P56545;P56545-2 P56545;P56545-2 C-terminal-bindin CTBP2              |
| NaN | NaN     | NaN     | NaN     | NaN     | NaN     | NaN     | 26.0154 | 25.8133 | NaN     | NaN     | NaN     | NaN     | Q01459 Q01459 Di-N-acetylchitobi CTBS                                |
| NaN | NaN     | NaN     | NaN     | 23.2262 | NaN     | P49711;P49711-2 P49711;P49711-2 Transcriptional re CTCF              |
|     | 24.0236 | 24.7918 | 25.1574 | 24.4163 | 24.9126 | 25.0751 | 24.1315 | NaN     | 24.552  | 25.0946 | 25.1829 | 25.0442 | Q9GZU7;Q9GZU7 Q9GZU7;Q9GZU7 Carboxy-terminal CTDSP1                  |
|     | 22.5525 | NaN     | 23.0799 | NaN     | 22.756  | NaN     | O14595;A0A087V O14595;A0A087V Carboxy-terminal CTDSP2                |
|     | 21.6621 | NaN     | NaN     | 22.1005 | 21.8414 | NaN     | NaN     | NaN     | NaN     | 22.9073 | NaN     | 23.2799 | O15194-2;O15194 O15194-2;O15194 CTD small phosph CTDSP1              |
|     | 21.3287 | NaN     | Q05D32;Q05D32- CTD small phosph CTDSP2                               |
|     | 28.8565 | 28.1418 | 27.7161 | 27.9578 | 26.4829 | 25.168  | 29.3206 | 30.003  | 27.5137 | 26.31   | 25.9442 | 24.6942 | P29279;P29279-2 P29279;P29279-2 Connective tissue CTGF               |
|     | 24.3124 | 25.0338 | 24.5029 | 23.3247 | 24.3558 | 24.0132 | NaN     | NaN     | NaN     | NaN     | NaN     | NaN     | P32929;P32929-3 P32929;P32929-3 Cystathionine gan CTH                |
|     | 27.1153 | 27.2623 | 28.4677 | 27.6442 | 27.6311 | 28.7059 | 27.68   | 27.42   | 27.3113 | 28.746  | 28.6718 | 28.6804 | P35221;P35221-2 P35221;P35221-2 Catenin alpha-1 CTNNA1               |
|     | 21.4059 | NaN     | 21.5931 | 21.4321 | NaN     | NaN     | NaN     | NaN     | NaN     | 22.9576 | 21.4331 | NaN     | P26232;P26232-2 P26232;P26232-2 Catenin alpha-2 CTNNA2               |
|     | 22.3915 | NaN     | NaN     | 22.6509 | NaN     | Q9UBT7;Q9UBT7- Q9UBT7;Q9UBT7- Alpha-catulin CTNNA1                   |
|     | 27.214  | 27.2378 | 28.8927 | 27.9499 | 28.0251 | 29.1344 | 27.79   | 27.2813 | 27.2912 | 29.2489 | 29.0191 | 28.3116 | P35222;B4DGU4;f P35222;B4DGU4 Catenin beta-1 CTNNB1                  |
|     | 26.3918 | 24.5102 | 25.5081 | 26.541  | 25.3338 | 25.6889 | 23.6697 | NaN     | NaN     | 25.0855 | 24.9872 | NaN     | Q8WYA6;A0A087 Q8WYA6;A0A087 Beta-catenin-like CTNNB1                 |



|     |         |         |         |         |         |         |         |         |         |         |         |                 |                            |                   |                      |                  |      |
|-----|---------|---------|---------|---------|---------|---------|---------|---------|---------|---------|---------|-----------------|----------------------------|-------------------|----------------------|------------------|------|
|     | 27.6398 | 27.8197 | 28.7224 | 27.8342 | 28.0395 | 29.1487 | 28.1776 | 27.4549 | 27.9621 | 29.0708 | 28.5755 | 28.6463         | O60716-3;O60716-3;O60716-3 | Catenin delta-1   | CTNND1               |                  |      |
|     | 28.5838 | 28.0222 | 28.0741 | 28.112  | 28.0256 | 28.0254 | 28.1649 | 28.1886 | 28.0669 | 28.4763 | 28.5969 | 28.133          | P17812;P17812-2            | P17812;P17812-2   | CTP synthase 1       | CTPS1            |      |
|     | 23.998  | 23.7769 | 23.8685 | 23.6672 | 23.8648 | 23.8057 | 23.9073 | NaN     | 23.9209 | 23.7691 | 23.9097 | 23.7417         | Q9NRF8                     | Q9NRF8            | CTP synthase 2       | CTPS2            |      |
|     | 24.2312 | 23.5048 | 23.4047 | 24.4256 | 23.5413 | 24.126  | NaN     | NaN     | NaN     | 23.8329 | NaN     | NaN             | Q6PD62;H0YCE8              | Q6PD62            | RNA polymerase-ε     | CTR9             |      |
| NaN | NaN     | NaN     | NaN     | NaN     | NaN     | NaN     | 26.9047 | NaN     | NaN     | NaN     | NaN     | NaN             | P40313;I3NI28;I3I          | P40313;I3NI28;I3I | Chymotrypsin-like    | CTRL             |      |
|     | 24.5945 | 25.3454 | 24.7466 | 24.2987 | 24.6802 | 24.7445 | 26.6483 | 27.1961 | 26.6565 | 25.4742 | 25.5199 | 26.0753         | P10619;X6R5C5;X            | P10619;X6R5C5;X   | Lysosomal protease   | CTSA             |      |
|     | 23.5189 | 24.8724 | 24.3789 | 23.9    | 24.2983 | 24.7324 | 26.0518 | 26.4843 | 25.9032 | 25.3036 | 24.7827 | 24.86           | P07858;R4GMQ5;P            | P07858;R4GMQ5;P   | Cathepsin B;Cath     | CTSB             |      |
|     | 25.1198 | 25.8021 | 25.1431 | 24.9213 | 25.4475 | 25.0122 | 27.7251 | 27.7474 | 26.1599 | 26.1706 | 26.019  | 25.1934         | P53634;H0YCY8;P            | P53634;H0YCY8     | Dipeptidyl peptidase | CTSC             |      |
|     | 28.5623 | 29.1791 | 28.3813 | 28.1115 | 28.661  | 28.3079 | 30.5355 | 29.4659 | 28.806  | 29.1742 | 28.7581 | 28.7577         | P07339;C9JH19;F            | P07339;C9JH19;F   | Cathepsin D;Cath     | CTSD             |      |
| NaN | NaN     | NaN     | NaN     | NaN     | NaN     | NaN     | NaN     | 23.1565 | 24.1255 | 24.4613 | 23.7308 | NaN             | Q9UBX1;H0YD65;Q            | Q9UBX1;H0YD65     | Cathepsin F          | CTSF             |      |
|     | 23.7367 | NaN     | NaN     | NaN     | NaN     | NaN     | 24.8581 | NaN     | NaN     | 24.5698 | 24.0785 | NaN             | P09668;A0A087X             | P09668;A0A087X    | Pro-cathepsin H;C    | CTSH             |      |
|     | 24.149  | 26.1641 | 24.4061 | 24.2859 | 25.3548 | 24.4712 | 28.0441 | 28.4217 | 26.5027 | 25.5217 | 24.8383 | 23.6453         | P07711;Q5T8F0;C            | P07711;Q5T8F0     | Cathepsin L1;Cath    | CTSL             |      |
|     | 25.6873 | 26.9425 | 25.4559 | 25.3547 | 26.1528 | 25.1725 | 28.5116 | 28.5067 | 27.1838 | 26.4826 | 25.6838 | 26.4409         | Q9UBR2                     | Q9UBR2            | Cathepsin Z          | CTSZ             |      |
|     | 28.2712 | 28.6358 | 28.4884 | 27.8553 | 28.189  | 28.489  | 28.6613 | 27.8548 | 26.5433 | 29.1925 | 28.6957 | 28.0458         | Q14247;Q14247-2            | Q14247;Q14247-2   | Src substrate cort   | CTTN             |      |
|     | 23.7019 | 22.9105 | 23.3442 | 23.3835 | 23.4424 | 23.3158 | NaN     | NaN     | NaN     | NaN     | NaN     | NaN             | Q9P2B4;B1AMN7              | Q9P2B4;B1AMN7     | CTTNBP2 N-termi      | CTTNBP2NL        |      |
|     | 22.6177 | NaN     | NaN     | 22.6567 | NaN             | Q7Z7A3                     | Q7Z7A3            | Cytoplasmic tRNA     | CTU1             |      |
|     | 22.1273 | NaN     | NaN     | 22.4569 | 22.2303 | NaN     | NaN     | NaN     | NaN     | NaN     | 22.8922 | 22.8953         | 23.0587                    | Q2VPK5;H3BSW6;Q   | Q2VPK5;H3BSW6        | Cytoplasmic tRNA | CTU2 |
|     | 26.2429 | 25.9006 | 26.3366 | 26.3432 | 26.1005 | 26.5344 | 26.5437 | 26.0668 | 26.2599 | 26.4885 | 26.528  | 26.7869         | Q13616;A0A0C4D             | Q13616;A0A0C4D    | Cullin-1             | CUL1             |      |
|     | 26.7604 | 26.5718 | 26.7985 | 27.0842 | 27.1977 | 27.1033 | 26.1393 | 26.7959 | 27.105  | 27.2559 | 27.3259 | 27.6016         | Q13617;A0A0A0N             | Q13617;A0A0A0N    | Cullin-2             | CUL2             |      |
|     | 25.4818 | 25.182  | 25.7033 | 25.4329 | 25.9774 | 25.7643 | 25.4978 | 25.7776 | 25.2938 | 25.5584 | 25.9301 | 25.8659         | Q13618;Q13618-1            | Q13618;Q13618-2   | Cullin-3             | CUL3             |      |
|     | 24.6387 | NaN     | 23.5975 | 24.7903 | 24.2775 | 23.8063 | NaN     | NaN     | NaN     | 24.6877 | NaN     | NaN             | Q13619;A0A0A0N             | Q13619;A0A0A0N    | Cullin-4A            | CUL4A            |      |
|     | 25.8249 | 25.2919 | 25.6852 | 25.7359 | 25.0156 | 25.5425 | 25.4    | 24.9119 | NaN     | 25.9242 | 25.4274 | 25.023          | Q13620-1;Q1362             | Q13620-1;Q1362    | Cullin-4B            | CUL4B            |      |
|     | 26.2156 | 26.3747 | 26.8225 | 26.4139 | 26.8246 | 27.001  | 26.4351 | 25.8637 | 26.2224 | 27.2274 | 26.7179 | 26.6795         | Q93034;H0YCA0;Q            | Q93034            | Cullin-5             | CUL5             |      |
|     | 22.0483 | NaN     | 21.9417 | 22.6832 | NaN     | 22.2477 | 23.0925 | NaN     | NaN     | 22.531  | NaN     | NaN             | Q14999;Q14999-1            | Q14999;Q14999-2   | Cullin-7             | CUL7             |      |
|     | 25.9065 | 27.3085 | 26.2514 | 25.7244 | 26.7477 | 26.3305 | 27.6621 | 27.8663 | 27.0245 | 26.1722 | 27.1723 | 26.9563         | O60888;O60888-2            | O60888;O60888-3   | Protein CutA         | CUTA             |      |
| NaN | NaN     | NaN     | 21.9394 | 20.9479 | NaN             | P39880-9;Q13948            | P39880-9;Q13948   | Homeobox protein     | CUX1             |      |
|     | 24.2638 | 23.1042 | 23.8394 | 24.6834 | 23.0816 | 22.8443 | NaN     | NaN     | NaN     | 23.1096 | NaN     | NaN             | Q9HCG8;B7WP74              | Q9HCG8;B7WP74     | Pre-mRNA-splicing    | CWC22            |      |
|     | 22.7105 | 23.6409 | 23.0151 | 23.066  | 23.5869 | NaN     | NaN     | NaN     | NaN     | 23.2271 | NaN     | NaN             | Q6UX04;D6REK3;I            | Q6UX04;D6REK3;I   | Peptidyl-prolyl cis  | CWC27            |      |
|     | 22.0992 | NaN     | 22.0823 | 22.1645 | NaN     | 22.1168 | NaN     | NaN     | NaN     | 22.2211 | 21.8134 | 21.6322         | Q69YN2;Q69YN2-1            | Q69YN2;Q69YN2-2   | CWF19-like protein   | CWF19L1          |      |
| NaN | NaN     | NaN     | NaN     | 21.2933 | NaN             | P78310;P78310-5            | P78310;P78310-5   | Coxsackievirus an    | CXADR            |      |
|     | 23.5919 | NaN             | P09341;P19875              | P09341;P19875     | Growth-regulated     | CXCL1;CXCL2      |      |
| NaN | NaN     | 25.3859 | NaN     | 24.2643 | NaN             | C9J4T6;P10145              | C9J4T6;P10145     | C-X-C motif chem     | CXCL8            |      |
|     | 24.3635 | 24.2049 | 24.1196 | 24.1887 | 23.8196 | 24.1127 | NaN     | NaN     | NaN     | NaN     | NaN     | NaN             | P61073;P61073-2            | P61073;P61073-2   | C-X-C chemokine      | CXCR4            |      |
| NaN | NaN     | NaN     | NaN     | 21.1642 | NaN             | O14569;U3KQU4              | O14569;U3KQU4     | Cytochrome b561      | CYB561D2         |      |
| NaN | NaN     | NaN     | 21.8007 | NaN             | P00167;P00167-2            | P00167;P00167-2   | Cytochrome b5        | CYB5A            |      |
|     | 25.848  | 24.6907 | 24.8891 | 24.9317 | 25.2388 | 25.3724 | 25.8267 | 26.4804 | 26.5516 | 25.0526 | 24.983  | 24.8986         | J3KNF8;O43169;H            | J3KNF8;O43169;H   | Cytochrome b5 ty     | CYB5B            |      |
| NaN | NaN     | NaN     | NaN     | 23.8768 | NaN             | Q9UHQ9;H7COR7              | Q9UHQ9;H7COR7     | NADH-cytochrom       | CYB5R1           |      |
|     | 27.6812 | 27.6523 | 27.9358 | 28.0575 | 27.7784 | 28.0441 | 28.1746 | 28.4769 | 28.9458 | 28.1248 | 27.8977 | 27.8565         | P00387;P00387-2            | P00387;P00387-2   | NADH-cytochrom       | CYB5R3           |      |
|     | 26.6158 | NaN     | 26.3375 | 26.7739 | 26.1428 | 26.3341 | NaN     | NaN     | NaN     | NaN     | NaN     | NaN             | Q7L1T6;A0A0A0N             | Q7L1T6            | Cytochrome b5 re     | CYB5R4           |      |
|     | 25.5823 | 24.7127 | 25.8927 | 25.3608 | 24.7514 | 25.9386 | 24.8003 | NaN     | NaN     | 24.9868 | 24.9491 | NaN             | P13498                     | P13498            | Cytochrome b-24;     | CYBA             |      |
|     | 25.4546 | NaN     | NaN     | NaN     | NaN     | NaN     | 25.4382 | NaN     | NaN     | NaN     | NaN     | NaN             | Q53TN4;Q53TN4-1            | Q53TN4;Q53TN4-2   | Cytochrome b red     | CYBRD1           |      |
|     | 24.4863 | 25.0378 | 25.0246 | 25.3788 | 25.4127 | 25.1171 | 23.7622 | 25.6969 | 26.1666 | 24.2453 | 24.9521 | 24.521          | P08574                     | P08574            | Cytochrome c1, h     | CYC1             |      |
|     | 27.2357 | 28.1059 | 27.5985 | 27.434  | 27.974  | 27.461  | 27.2464 | 27.8751 | 28.2374 | 27.4045 | 27.5455 | 28.0543         | P99999;C9JFR7;C            | P99999;C9JFR7     | Cytochrome c         | CYCS             |      |
|     | 29.0765 | 28.5575 | 29.2078 | 28.9199 | 28.8397 | 29.2435 | 29.2341 | 29.103  | 29.0086 | 29.5352 | 29.4995 | 28.9945         | Q7L576;A0A0G2J             | Q7L576;A0A0G2J    | Cytoplasmic FMR:     | CYFIP1           |      |
| NaN | NaN     | NaN     | NaN     | 23.7341 | NaN             | E7EVJ5;Q96F07-2            | E7EVJ5;Q96F07-2   | Cytoplasmic FMR:     | CYFIP2           |      |
|     | 21.1139 | NaN             | Q6UW02;E9PHG5              | Q6UW02;E9PHG5     | Cytochrome P450      | CYP20A1          |      |
|     | 22.4493 | NaN     | 22.5086 | 22.7781 | 22.38   | 23.1013 | 23.1717 | 23.9195 | 23.8577 | 23.1931 | 23.3193 | NaN             | Q16850;A0A0C4D             | Q16850;A0A0C4D    | Lanosterol 14-α      | CYP51A1          |      |
|     | 30.9439 | 29.9705 | 31.1002 | 29.7358 | 29.4229 | 29.8383 | 33.8971 | 34.4207 | 31.7915 | 31.1042 | 30.9648 | 29.8248         | O00622;A0A087V             | O00622;A0A087V    | Protein CYR61        | CYR61            |      |
| NaN | NaN     | NaN     | NaN     | 22.2576 | NaN             | A8MQ03;B8A4K4              | A8MQ03;B8A4K4     | Cysteine-rich tail   | CYSRT1           |      |
|     | 22.3464 | NaN     | 22.5939 | 21.8483 | NaN             | Q9Y4D1;Q9Y4D1-1            | Q9Y4D1;Q9Y4D1-1   | Dishevelled-associ   | DAAM1            |      |
| NaN | NaN     | 24.6802 | 23.5419 | 23.4821 | 24.1701 | 23.4278 | NaN     | NaN     | NaN     | NaN     | NaN     | NaN             | P98082;P98082-3            | P98082;P98082-3   | Disabled homolog     | DAB2             |      |
| NaN | NaN     | 22.6216 | 22.9196 | NaN     | NaN     | NaN     | 23.0095 | NaN     | NaN     | NaN     | NaN     | NaN             | P61803;F5GX5;F             | P61803;F5GX5;F    | Dolichyl-diphosph    | DAD1             |      |
|     | 25.7639 | 25.9404 | 25.6153 | 25.5028 | 25.367  | 26.2291 | 27.2888 | 26.4638 | 26.9144 | 25.98   | 26.4613 | Q14118;C9JY51;C | Q14118                     | Dystroglycan;Alph | DAG1                 |                  |      |
|     | 26.08   | 25.2471 | 25.5851 | 25.9693 | 25.1407 | 25.7254 | 25.3577 | 25.4583 | 25.4578 | 25.1019 | 24.965  | 25.2271         | Q8NCG7;Q8NCG7              | Q8NCG7            | Sn1-specific diacy   | DAGLB            |      |
|     | 22.3206 | 22.1985 | 22.7926 | 22.6882 | 22.8659 | NaN     | 23.128  | NaN     | NaN     | 23.0348 | 22.7452 | NaN             | Q3LXA3;A0A087V             | Q3LXA3;A0A087V    | Bifunctional ATP-γ   | DAK;TKFC         |      |
| NaN | NaN     | NaN     | NaN     | NaN     | NaN     | NaN     | 25.0513 | NaN     | NaN     | NaN     | NaN     | NaN             | P51397;B4DQ75              | P51397;B4DQ75     | Death-associated     | DAP              |      |
|     | 21.7425 | NaN     | NaN     | 22.6436 | 21.8055 | 21.4829 | NaN     | NaN     | NaN     | NaN     | NaN     | NaN             | V9GZ03;P51398;P            | V9GZ03;P51398;P   | 28S ribosomal pro    | DAP3             |      |
|     | 25.7282 | 26.3679 | 26.0958 | 26.1987 | 26.17   | 26.1787 | 26.5638 | 27.0706 | 26.6931 | 26.0483 | 26.0143 | 25.3559         | Q43293;Q43293-2            | Q43293            | Death-associated     | DAPK3            |      |
|     | 31.1982 | 30.3735 | 30.4756 | 30.9507 | 30.4564 | 30.605  | 29.9131 | 30.401  | 29.8829 | 30.772  | 30.7191 | 30.0781         | P14868;P14868-2            | P14868;P14868-2   | Aspartate-tRNA       | DARS             |      |
|     | 25.8312 | 24.4009 | 24.8631 | 26.0527 | 24.5968 | 24.688  | NaN     | NaN     | NaN     | 24.577  | 24.3973 | 23.6018         | Q6P148                     | Q6P148            | Aspartate-tRNA       | DARS2            |      |



|         |         |     |         |     |         |         |         |         |         |         |         |         |                                                          |         |                                                         |                                                                   |
|---------|---------|-----|---------|-----|---------|---------|---------|---------|---------|---------|---------|---------|----------------------------------------------------------|---------|---------------------------------------------------------|-------------------------------------------------------------------|
| 23.6823 | NaN     |     | 23.4278 |     | 23.7436 | 23.3659 | NaN     | NaN     | NaN     | 23.2142 | 23.3727 | NaN     | Q9UER7;Q9UER7- Q9UER7;Q9UER7- Death domain-ass DAXX      |         |                                                         |                                                                   |
| 24.4753 | 24.6731 |     | 23.8273 |     | 24.5622 | 24.5987 |         | 24.1525 | 23.894  | 24.2252 | 23.9006 |         | Q96EP5;K7EQ02;† Q96EP5;K7EQ02;‡ DAZ-associated pr DAZAP1 |         |                                                         |                                                                   |
| 25.5519 | 25.2604 |     | 24.9442 |     | 26.0638 | 25.362  |         | 24.6915 | 25.3796 | 25.0028 | 24.0622 | 26.2461 | 25.642                                                   | NaN     | P07108;P07108-5 P07108;P07108-5 Acyl-CoA-binding DBI    |                                                                   |
| 28.2984 | 28.6915 |     | 28.6812 |     | 28.2261 | 28.5817 |         | 28.8272 | 28.971  | 28.1402 | 28.3002 | 29.6167 | 29.2218                                                  | 29.5781 | Q16643;Q16643-‡ Q16643;Q16643-‡ Drebrin DBN1            |                                                                   |
| 27.711  | 28.1344 |     | 28.0032 |     | 27.727  | 27.9893 |         | 27.9174 | 27.803  | 27.647  | 27.8902 | 28.0067 | 27.9473                                                  | 28.0042 | Q9UJU6;H0Y5J4;C Q9UJU6;H0Y5J4;C Drebrin-like prote DBNL |                                                                   |
| NaN     | NaN     | NaN | NaN     |     | 21.9744 | NaN                                                      | NaN     | Q9UJU6-2;Q9UJU Q9UJU6-2;Q9UJU Drebrin-like prote DBNL   |                                                                   |
| 24.2907 | NaN     |     | 23.9406 |     | 24.0927 | NaN     |         | 23.5623 | NaN     | NaN     | 23.3496 |         | 24.1405                                                  | 24.3187 | NaN                                                     | Q9UK59;Q9UK59- Q9UK59 Lariat debranchinq DBR1                     |
| 23.166  | NaN     |     | NaN     |     | 23.1228 | NaN     |         | NaN     | NaN     | NaN     | NaN     |         | NaN                                                      | NaN     | NaN                                                     | Q8TEB1;Q8TEB1-‡ Q8TEB1;Q8TEB1-‡ DDB1- and CUL4-‡ DCAF11           |
| 23.5664 | NaN     |     | NaN     |     | NaN     | NaN     |         | NaN     | NaN     | NaN     | NaN     |         | NaN                                                      | NaN     | NaN                                                     | Q9NV06;B3KME9; Q9NV06;B3KME9; DDB1- and CUL4-‡ DCAF13             |
| 22.6973 | NaN     |     | NaN     |     | NaN     | NaN     |         | NaN     | NaN     | NaN     | NaN     |         | NaN                                                      | NaN     | NaN                                                     | Q9NXF7 Q9NXF7 DDB1- and CUL4-‡ DCAF16                             |
| 25.5354 | 24.8538 |     | 24.943  |     | 24.8242 |         | 24.7153 | 24.1362 | 24.4566 | NaN     | NaN     |         | 24.8743                                                  | 24.9619 | 24.1188                                                 | P61962;A0A087W P61962;A0A087W DDB1- and CUL4-‡ DCAF7              |
| 25.4663 | 24.1328 |     | 24.1573 |     | 25.1964 |         | 24.1287 | 24.2489 | 24.3397 |         | 24.7818 | NaN     | NaN                                                      | 24.4665 | NaN                                                     | Q5TAQ9;G3V3G9; Q5TAQ9;G3V3G9; DDB1- and CUL4-‡ DCAF8              |
| NaN     | NaN     | NaN | NaN     | NaN | NaN     | NaN     | NaN     | NaN     | 22.7369 | NaN     | NaN     | NaN     | NaN                                                      | NaN     | NaN                                                     | Q8N8Z6;Q8N8Z6- Q8N8Z6;Q8N8Z6-‡ Discoidin, CUB anr DCBLD1          |
| 25.2973 | 25.3822 |     | 25.384  |     | 24.9642 |         | 25.123  | 25.642  | 26.1858 | 25.2449 | 25.2073 |         | 25.8895                                                  | 25.5809 | 25.7138                                                 | Q96PD2;Q96PD2- Q96PD2;Q96PD2-‡ Discoidin, CUB anr DCBLD2          |
| 23.6326 | 27.0645 |     | 24.683  |     | 24.0082 |         | 24.5318 | 24.2663 | 26.0697 | 25.5153 | 26.9661 |         | 25.6795                                                  | 25.5571 | 26.0824                                                 | P81605;P81605-2 P81605;P81605-2 Dermcidin;Survive DCD             |
| 26.6102 | 26.4034 |     | 25.9225 |     | 26.3334 |         | 26.1981 | 25.8107 | 25.2711 | 25.5075 | 25.7617 |         | 26.8033                                                  | 26.9759 | 25.5676                                                 | P27707;D6RFG8;‡ P27707;D6RFG8;‡ Deoxycytidine kin DCK             |
| 25.423  | 24.5087 |     | 24.4619 |     | 25.2094 |         | 24.3816 | 24.4005 | 24.139  | 24.4718 | NaN     |         | 24.2321                                                  | 24.7157 | 24.3237                                                 | Q9NP16;Q9NP16-2 Q9NP16;Q9NP16-2 mRNA-decapping DCP1A              |
| 25.5065 | 25.0324 |     | 24.8669 |     | 25.1818 |         | 25.434  | 25.1411 | 24.7444 | NaN     | NaN     |         | 25.5492                                                  | 25.6597 | 25.4291                                                 | Q96C86 Q96C86 m7GpppX diphosph DCP5                               |
| 24.518  | 25.2697 |     | 25.1834 |     | 25.444  |         | 25.2283 | 25.2173 | 25.293  | 25.2647 |         | 25.6597 | 25.5754                                                  | 25.4862 | 25.7673                                                 | P32321;P32321-2 P32321;P32321-2 Deoxycytidylate d DCTD            |
| 28.2449 | 28.795  |     | 28.6493 |     | 28.2509 |         | 28.7827 | 28.6131 | 28.7894 | 29.4621 |         | 28.8128 | 28.6013                                                  | 29.0876 | 28.9609                                                 | E7EX90;Q14203-3 E7EX90;Q14203-3 Dynactin subunit‡ DCTN1;DKFZp686f |
| 27.7617 | 28.659  |     | 28.0124 |     | 27.3702 |         | 28.2502 | 27.9943 | 28.0048 | 29.0751 |         | 28.4343 | 27.4322                                                  | 27.9375 | 28.2489                                                 | Q13561;Q13561-‡ Q13561;Q13561-‡ Dynactin subunit‡ DCTN2           |
| 26.3449 | 26.7735 |     | 26.3016 |     | 26.5086 |         | 26.5455 | 26.5685 | 27.1612 | 27.2436 |         | 25.689  | 27.1745                                                  | 26.6927 | 26.8884                                                 | O75935;O75935-‡ O75935;O75935-‡ Dynactin subunit‡ DCTN3           |
| 25.7055 | 25.7473 |     | 25.4406 |     | 25.099  |         | 25.9606 | 25.5977 | 25.9021 | 26.2455 |         | 25.9083 | 25.784                                                   | 25.8598 | 26.0134                                                 | Q9UJW0;Q9UJWC Q9UJW0;Q9UJW0 Dynactin subunit‡ DCTN4               |
| 22.8469 | 23.1455 |     | 22.9396 |     | 22.5751 |         | 23.4658 | NaN     | NaN     | NaN     | NaN     |         | 23.2141                                                  | 23.6844 | NaN                                                     | Q9BTE1;H3BUD2; Q9BTE1;H3BUD2;‡ Dynactin subunit‡ DCTN5            |
| 24.974  | 25.0172 |     | 25.0551 |     | 24.7472 |         | 25.3956 | 25.2958 | 25.2548 | 25.9593 |         | 24.9627 | 24.5275                                                  | NaN     | NaN                                                     | O00399;E5RKK0 O00399 Dynactin subunit‡ DCTN6                      |
| 25.162  | 25.5263 |     | 24.9149 |     | 24.6406 |         | 24.7362 | 24.8758 | 24.9785 | 25.0638 |         | 24.3723 | 25.0403                                                  | 25.059  | 24.5711                                                 | Q9H773 Q9H773 dCTP pyrophosph DCTPP1                              |
| 22.6878 | NaN     | NaN | NaN     |     | 22.0726 | NaN                                                      | NaN     | NaN                                                     | Q96GG9;C9JVE2;‡ Q96GG9;C9JVE2;‡ DCN1-like protein DCUN1D1         |
| 22.3281 | 23.8856 |     | 24.625  |     | 24.0174 |         | 23.7966 | 24.8689 | 23.7987 | 23.5312 |         | 23.4096 | 25.3608                                                  | 24.6996 | 24.3521                                                 | Q8IWE4 Q8IWE4 DCN1-like protein DCUN1D3                           |
| 25.5672 | 24.3863 |     | 24.9856 |     | 25.8634 |         | 24.9208 | 25.0566 | 24.1194 | NaN     | NaN     |         | 24.3834                                                  | 25.2193 | NaN                                                     | Q9BTE7;H0YCN4;‡ Q9BTE7;H0YCN4;‡ DCN1-like protein DCUN1D5         |
| 26.2899 | 25.7122 |     | 25.4076 |     | 26.0821 |         | 25.9242 | 25.4823 | 24.7871 | 24.2994 |         | 24.9675 | 25.5038                                                  | 25.6127 | 24.8389                                                 | Q7Z4W1;J3KS22;‡ Q7Z4W1;J3KS22;‡ L-xylulose reducta DCXR           |
| 22.9617 | NaN     | NaN | NaN     | NaN | NaN     | NaN     | NaN     | NaN     | NaN     | NaN     | NaN     | NaN     | NaN                                                      | NaN     | NaN                                                     | Q9BW61 Q9BW61 DET1- and DDB1-‡ DDA1                               |
| 28.5468 | 29.6986 |     | 29.2216 |     | 28.5944 |         | 29.6552 | 29.4422 | 29.2981 | 29.2884 |         | 28.9876 | 29.577                                                   | 29.4841 | 29.827                                                  | O94760;B4DYP1;‡ O94760;B4DYP1;‡ C(N)(G);N(G)-dimeth DDAH1         |
| 24.7722 | 26.3481 |     | 25.9553 |     | 24.9594 |         | 26.3368 | 26.1414 | 25.8287 | 25.9555 |         | 25.742  | 25.9607                                                  | 26.0856 | 26.5003                                                 | O95865;Q5SSV3;‡ O95865;Q5SSV3;‡ C(N)(G);N(G)-dimeth DDAH2         |
| 28.6207 | 28.712  |     | 28.7108 |     | 28.6244 |         | 28.6522 | 28.8226 | 28.5604 | 28.8884 |         | 28.2083 | 28.721                                                   | 28.9194 | 28.8221                                                 | Q16531;F5GY55;‡ Q16531;F5GY55 DNA damage-binc DDB1                |
| NaN     | NaN     | NaN | NaN     | NaN | 21.2804 | NaN                                                      | NaN     | NaN                                                     | Q8NEL9;A0A087X Q8NEL9;A0A087X Phospholipase DD DDHD1              |
| 27.0701 | 26.9033 |     | 27.0473 |     | 27.4278 |         | 26.9714 | 27.3148 | 26.9628 | 26.8751 |         | 27.8045 | 26.9801                                                  | 26.9589 | 27.07                                                   | P39656;A0A0C4D P39656;A0A0C4D Diolchyl-diphosph DDOST             |
| 24.1185 | 23.7033 |     | 24.4678 |     | 24.0509 | NaN     | NaN     |         | 23.6099 | NaN     | NaN     |         | 24.1877                                                  | 24.0271 | NaN                                                     | Q96HY6;A0A0A0 Q96HY6;A0A0A0 DDRGK domain-cc DDRGK1                |
| 26.522  | 26.9637 |     | 26.879  |     | 26.4345 |         | 26.6179 | 26.8363 | 26.9933 | 25.7926 |         | 26.6909 | 26.9956                                                  | 26.5165 | 26.6094                                                 | P30046;A6NHG4;‡ P30046;A6NHG4;‡ D-dopachrome de DDT;DTL           |
| 28.0498 | 28.3321 |     | 28.1259 |     | 28.1482 |         | 28.5867 | 28.0435 | 28.0971 | 28.3551 |         | 28.5433 | 28.472                                                   | 28.5389 | 28.7235                                                 | Q92499;F1T0B3;A Q92499;F1T0B3;A ATP-dependent R DDX1              |
| 23.7582 | NaN     |     | 22.9562 |     | 24.0109 | NaN     |         | 23.2432 | NaN     | NaN     | NaN     | NaN     | NaN                                                      | NaN     | NaN                                                     | Q13206;E9PIF2 Q13206;E9PIF2 Probable ATP-dep DDX10                |
| 27.8143 | 27.1462 |     | 27.228  |     | 27.9978 |         | 27.4567 | 27.4859 | 26.76   | 26.887  |         | 26.567  | 28.0288                                                  | 28.1967 | 27.9921                                                 | Q92841;H3BLZ8;‡ Q92841;H3BLZ8;‡ Probable ATP-dep DDX17            |
| 27.2856 | 25.3806 |     | 27.741  |     | 28.0166 |         | 26.7905 | 27.8062 | 24.7921 | 25.1238 |         | 23.9518 | 27.4107                                                  | 26.9143 | 26.6984                                                 | Q9NVNP1;H7C452 Q9NVNP1 ATP-dependent R DDX18                      |
| 26.7703 | 26.3243 |     | 26.2808 |     | 26.5037 |         | 26.3092 | 26.638  | 26.5932 | 26.3823 |         | 26.5353 | 26.9595                                                  | 27.058  | 26.7834                                                 | Q9NUU7;I3LOH8;‡ Q9NUU7;I3LOH8;‡ ATP-dependent R DDX19A;DDX19B     |
| 27.948  | 26.3009 |     | 27.1576 |     | 28.0782 |         | 26.3414 | 26.9085 | 24.8411 | 24.7308 |         | 23.9643 | 26.0041                                                  | 26.5895 | 24.3758                                                 | Q9UHI6;E9PJ60;Q Q9UHI6 Probable ATP-dep DDX20                     |
| 29.8949 | 28.7743 |     | 29.3783 |     | 30.3761 |         | 29.3502 | 29.5996 | 27.7412 | 28.5038 |         | 28.0129 | 29.0716                                                  | 29.4706 | 29.0903                                                 | Q9NR30;Q9NR30- Q9NR30;Q9NR30-‡ Nucleolar RNA hel DDX21            |
| 24.3028 | 23.9536 |     | 24.4415 |     | 24.6683 |         | 24.4177 | 24.6372 | 24.2966 | NaN     | NaN     |         | 24.4381                                                  | 24.6526 | NaN                                                     | Q9BUQ8;H0YI52 Q9BUQ8 Probable ATP-dep DDX23                       |
| 26.3358 | 24.6099 |     | 24.551  |     | 26.4288 |         | 25.2173 | 23.447  | NaN     | NaN     | NaN     |         | 22.8513                                                  | 23.1105 | 23.4774                                                 | Q9GZR7;G3V529;‡ Q9GZR7;G3V529;‡ ATP-dependent R DDX24             |
| 26.1221 | 24.1043 |     | 24.4319 |     | 25.7092 |         | 24.8206 | 24.5434 | NaN     | NaN     | NaN     |         | 23.0487                                                  | 24.9932 | NaN                                                     | Q96GQ7;B7Z6D5; Q96GQ7;B7Z6D5 Probable ATP-dep DDX27               |
| 29.6218 | 28.6751 |     | 29.3205 |     | 30.0628 |         | 29.1436 | 29.5493 | 28.2485 | 28.3296 |         | 28.7406 | 29.4757                                                  | 29.6532 | 29.6594                                                 | O00148;O00148-‡ O00148;O00148-2 ATP-dependent R DDX39A            |
| 26.8917 | 26.2278 |     | 26.9096 |     | 27.4084 |         | 26.7082 | 26.8102 | 25.961  | 26.034  |         | 26.0911 | 26.4372                                                  | 27.0471 | 27.6317                                                 | Q13838;Q13838-‡ Q13838;Q13838-2 Spliceosome RNA DDX39B            |
| 30.4292 | 29.6045 |     | 29.7864 |     | 30.4054 |         | 29.7412 | 29.7048 | 29.749  | 30.1522 |         | 29.4425 | 30.0077                                                  | 29.8968 | 29.7069                                                 | O00571;A0A0D9S O00571;A0A0D9S ATP-dependent R DDX3X;DDX3Y         |
| 24.6995 | NaN     |     | 23.9911 |     | 24.9553 |         | 24.2513 | 24.0294 | NaN     | NaN     | NaN     |         | 24.6379                                                  | 24.5735 | 24.2613                                                 | Q9UJV9;J3KNN5;‡ Q9UJV9;J3KNN5 Probable ATP-dep DDX41              |
| 23.2219 | 23.4564 |     | 23.7314 |     | 23.3574 |         | 23.6426 | 24.0399 | NaN     | NaN     | NaN     |         | 23.8313                                                  | 24.1329 | 24.2022                                                 | Q86XP3;A0A0A0 Q86XP3;A0A0A0 ATP-dependent R DDX42                 |
| 28.7572 | 27.7352 |     | 27.953  |     | 28.5916 |         | 27.9912 | 28.0837 | 26.5792 | 26.7894 |         | 27.3241 | 27.6042                                                  | 27.9975 | 27.7971                                                 | Q7L014;A0A0C4D Q7L014;A0A0C4D Probable ATP-dep DDX46              |
| 27.3415 | 25.0059 |     | 25.7666 |     | 27.3589 |         | 25.8755 | 26.0494 | 24.471  | 24.4153 |         | 23.2982 | 25.6961                                                  | 26.3057 | 24.2999                                                 | Q9H0S4;Q9H0S4-‡ Q9H0S4;Q9H0S4-‡ Probable ATP-dep DDX47            |
| 24.6668 | NaN     |     | 22.3098 |     | 23.967  |         | 22.0333 | 22.1579 | NaN     | NaN     | NaN     |         | 21.8477                                                  | NaN     | NaN                                                     | Q9Y6V7;Q9Y6V7-‡ Q9Y6V7 Probable ATP-dep DDX49                     |
| 30.0906 | 29.4485 |     | 29.6925 |     | 30.4299 |         | 29.7775 | 30.0351 | 28.4804 | 28.7453 |         | 28.1249 | 29.8715                                                  | 29.9268 | 29.3819                                                 | P17844;J3KTA4;P P17844;J3KTA4;P Probable ATP-dep DDX5             |
| 26.2686 | 25.532  |     | 26.0483 |     | 27.1648 |         | 26.1306 | 26.2446 | NaN     | 25.673  |         | 24.0426 | 25.0522                                                  | 25.6323 | 25.0388                                                 | Q9BQ39;A0A087V Q9BQ39;A0A087V ATP-dependent R DDX50               |
| 20.9835 | NaN     | NaN | NaN     | NaN | NaN     | NaN     | NaN     | NaN     | NaN     | NaN     | NaN     | NaN     | NaN                                                      | NaN     | NaN                                                     | Q8N8A6 Q8N8A6 ATP-dependent R DDX51                               |
| 23.0247 | 21.9891 |     | 22.5945 |     | 23.8714 |         | 22.4088 | NaN     | NaN     | NaN     | NaN     | NaN     | NaN                                                      | NaN     | NaN                                                     | Q9Y2R4;A0A087X Q9Y2R4 Probable ATP-dep DDX52                      |



|     |         |         |         |         |         |         |         |         |         |         |         |         |                                                  |                                                  |                    |         |
|-----|---------|---------|---------|---------|---------|---------|---------|---------|---------|---------|---------|---------|--------------------------------------------------|--------------------------------------------------|--------------------|---------|
|     | 26.0536 | 24.2688 | 24.7482 | 25.9791 | 24.6515 | 24.6694 | 22.5409 | 23.7107 | NaN     |         | 23.6528 | 23.792  | NaN                                              | Q8TDD1;Q8TDD1-Q8TDD1;Q8TDD1-ATP-dependent R      | DDX54              |         |
|     | 25.4618 | 23.1028 | 24.5164 | 25.8949 | 23.5959 | 24.4678 | 22.9352 | NaN     |         | 23.1981 | 23.3791 | 23.6717 | 22.7831                                          | Q8NHQ9;F5H5U2-Q8NHQ9;F5H5U2-ATP-dependent R      | DDX55              |         |
|     | 25.1495 | 23.8602 | 24.3351 | 25.258  | 25.0392 | 24.4284 | NaN     | NaN     | NaN     |         | 23.556  | NaN     | NaN                                              | Q9NY93;Q9NY93-Q9NY93;Q9NY93-Probable ATP-dep     | DDX56              |         |
|     | 25.7924 | 24.7488 | 25.8562 | 26.0738 | 25.0989 | 25.737  | 22.5502 | NaN     |         | 24.2536 | 24.1706 | 24.289  | 23.6146                                          | O95786;O95786-2-O95786;O95786-2 Probable ATP-dep | DDX58              |         |
|     | 28.0443 | 26.9095 | 27.2982 | 27.6741 | 26.71   | 26.8096 | 26.7872 | 24.0601 | 25.6063 | 27.1395 | 26.6661 | 26.0603 | P26196;Q8IV96-P26196                             | Probable ATP-dep                                 | DDX6               |         |
|     | 26.4631 | 26.5049 | 26.0606 | 26.0838 | 26.3299 | 26.0323 | 24.2356 | 25.3353 | 25.6806 | 25.8621 | 26.4314 | 25.2348 | Q16698;Q16698-Q16698;Q16698-2,4-dienoyl-CoA r    | DECR1                                            |                    |         |
|     | 25.7287 | 25.8991 | 26.7036 | 25.7527 | 26.1625 | 26.9406 | 25.0346 | NaN     | 24.2807 | 26.2494 | 26.1795 | 26.2002 | Q9H4E7;Q6TDU7;Q9H4E7                             | Differentially expr                              | DEF6               |         |
| NaN | NaN     | NaN     | NaN     | NaN     | NaN     | NaN     | NaN     | NaN     | NaN     | 22.5091 | NaN     | NaN     | O15121                                           | Sphingolipid delta                               | DG5S1              |         |
|     | 28.407  | 26.5188 | 27.1148 | 28.6642 | 26.9654 | 27.5771 | 26.8585 | 25.634  | 25.4478 | 27.2677 | 27.5947 | 26.6831 | P35659;B4DFG0;F-P35659;B4DFG0;P                  | Protein DEK                                      | DEK                |         |
| NaN | NaN     | NaN     | NaN     | 22.3823 | NaN                                              | Q8IWF6                                           | Protein DENND6A    | DENND6A |
|     | 26.0301 | 25.5463 | 25.1949 | 24.9317 | 24.8139 | 24.805  | 25.3536 | 25.2589 | NaN     | 24.5676 | 24.9989 | 25.5041 | O43583;F8VVL1-O43583;F8VVL1                      | Density-regulated DENR                           |                    |         |
| NaN | NaN     | NaN     | NaN     | NaN     | NaN     | NaN     | NaN     | NaN     | NaN     | 24.0869 | NaN     | NaN     | Q5TB30;Q5TB30-Q5TB30;Q5TB30-DEP domain-cont      | DEPDC1                                           |                    |         |
| NaN | NaN     | NaN     | NaN     | NaN     | NaN     | NaN     | NaN     | NaN     | NaN     | 23.7121 | 22.6982 | NaN     | Q8WUY9;Q8WUY-Q8WUY9;Q8WUY-DEP domain-cont        | DEPDC1B                                          |                    |         |
|     | 24.6669 | 24.2819 | 24.9777 | 24.5171 | 24.9083 | 24.7824 | 24.247  | 24.7046 | 25.2104 | 24.4089 | 24.6395 | 24.6318 | Q9Y315;G3V158;E-Q9Y315;G3V158;E                  | Deoxyribose-phos                                 | DERA               |         |
|     | 24.6753 | 24.0156 | 24.0483 | 24.5486 | 23.7067 | NaN     | 24.0216 | NaN     |         | 24.1835 | 23.8987 | 23.2791 | 24.0642                                          | Q9BUN8;B4E1G1;Q9BUN8;B4E1G1;Derlin-1             | DERL1              |         |
|     | 23.4261 | 23.5424 | 24.1125 | 24.0469 | 23.8089 | 24.2022 | 23.5541 | 24.6354 | 24.8366 | 23.8209 | 23.7507 | 24.4633 | Q9GZP9;I3L1T3-Q9GZP9;I3L1T3                      | Derlin-2                                         | DERL2              |         |
|     | 23.7282 | 23.7898 | 23.0684 | 23.6297 | 23.5548 | NaN     | NaN     | NaN     | NaN     | 23.8219 | 24.5745 | NaN     | O00273;O00273-2-O00273;O00273-2 DNA fragmentatic | DFFA                                             |                    |         |
|     | 26.8557 | 26.6188 | 26.7489 | 26.9922 | 26.5681 | 26.8134 | 26.1193 | 25.8349 | 26.2236 | 26.5142 | 26.6976 | 26.598  | O60443;H7C3W1;O60443;H7C3W1                      | Non-syndromic hc                                 | DFNA5              |         |
|     | 23.1271 | 22.9281 | 23.3069 | 23.2891 | 23.7351 | NaN     | NaN     | NaN     | NaN     | NaN     |         | 23.5023 | Q13574-7;Q13574-Q13574-7;Q13574                  | Diaclylglycerol kin                              | DGKZ               |         |
|     | 22.3449 | NaN     | 22.1944 | NaN     | NaN     | NaN     | NaN     | NaN     | NaN     | 22.254  | NaN     | NaN     | Q16854;Q16854-Q16854;Q16854-2 Deoxyguanosine t   | DGUOK                                            |                    |         |
|     | 25.2777 | 24.0049 | 24.8105 | 25.6425 | 24.539  | 24.8221 | 26.5203 | NaN     | 23.7484 | 26.4732 | 25.1595 | 24.8326 | Q15392;Q3LIE7;Q15392;Q3LIE7;Q                    | Delta(24)-sterol r                               | DHCR24;Nbla0364    |         |
|     | 26.0348 | 25.6748 | 25.652  | 26.1669 | 25.2441 | 25.6845 | 26.712  | 26.8921 | 26.6711 | 27.128  | 26.2652 | NaN     | Q9UBM7;E9PMOC-Q9UBM7                             | 7-dehydrocholest                                 | DHCR7              |         |
|     | 25.4203 | 25.3018 | 25.597  | 25.3085 | 25.5177 | 25.7246 | 24.5    | NaN     | 25.0179 | 25.6073 | 26.1695 | 25.3875 | P00374;P00374-2-P00374;P00374-2                  | Dihydrofolate red                                | DHFR               |         |
|     | 25.075  | 25.5569 | 25.2876 | 24.9354 | 25.5023 | 25.2913 | 25.6082 | 25.9094 | 25.4359 | 25.744  | 25.9218 | 26.0116 | P49366;A0A087W-P49366;A0A087W                    | Deoxyhypusine sy                                 | DHPS               |         |
|     | 22.2052 | 22.2549 | 22.6278 | 22.9318 | 23.1291 | NaN     | 22.6741 | NaN     | NaN     | 22.7595 | 22.7154 | NaN     | Q96LJ7;H0YNC2-Q96LJ7;H0YNC2                      | Dehydrogenase/n                                  | DHRS1              |         |
|     | 23.7745 | 24.0214 | 23.9513 | 24.1374 | 24.0018 | 24.0669 | 23.0878 | 23.7472 | 23.9027 | 23.4726 | 24.3345 | 23.5662 | Q9BTZ2;Q9BTZ2-E-Q9BTZ2;Q9BTZ2-E                  | Dehydrogenase/n                                  | DHRS4              |         |
|     | 23.7718 | NaN     | 23.5491 | 24.0769 | 22.8561 | NaN     | NaN     | NaN     | NaN     | 24.1761 | NaN     | NaN     | Q9Y394;Q9Y394-2-Q9Y394;Q9Y394-2                  | Dehydrogenase/n                                  | DHRS7              |         |
|     | 24.2043 | 24.034  | 24.321  | 24.5218 | 24.3056 | 24.3696 | 24.8899 | 25.2593 | 24.9167 | 24.6372 | 24.5346 | 24.6897 | Q6IAN0;A0A0C4D-Q6IAN0;A0A0C4D                    | Dehydrogenase/n                                  | DHRS7B             |         |
|     | 29.7061 | 28.9361 | 29.3904 | 29.9422 | 29.4314 | 29.6131 | 28.5706 | 28.877  | 29.0268 | 29.8609 | 29.8334 | 29.7866 | O43143                                           | Pre-mRNA-splicing                                | DHX15              |         |
|     | 25.5857 | 24.246  | 25.1601 | 25.9377 | 25.1531 | 25.2991 | 27.5524 | NaN     | 23.7481 | 25.807  | 26.1943 | 25.4715 | O60231;Q5SQH5-Q60231;Q5SQH5                      | Putative pre-mRN                                 | DHX16              |         |
|     | 27.1352 | 26.1406 | 26.5143 | 26.9037 | 26.3212 | 26.1885 | 25.6901 | 25.089  | 23.7077 | 26.4811 | 26.2381 | 25.6372 | Q7Z478;A0A087W-Q7Z478;A0A087W                    | ATP-dependent R                                  | DHX29              |         |
|     | 28.5233 | 26.6546 | 27.1444 | 28.8776 | 27.5032 | 27.2996 | 25.0152 | 24.6669 | 25.6809 | 26.8445 | 27.2222 | 25.4966 | Q7L2E3;Q7L2E3-2-Q7L2E3;Q7L2E3-2                  | Putative ATP-depr                                | DHX30              |         |
|     | 24.3554 | NaN     | 24.3788 | 23.8764 | 23.5972 | 23.3777 | NaN     | NaN     | NaN     | 23.7447 | NaN     | NaN     | Q7L7V1;Q7L7V1-2-Q7L7V1;Q7L7V1-2                  | Putative pre-mRN                                 | DHX32              |         |
|     | 24.1168 | NaN     | NaN     | 24.0433 | NaN     | NaN     | NaN     | NaN     | NaN     | 22.705  | NaN     | NaN     | Q9H6R0;I3L1L6;Q9H6R0;I3L1L6                      | Putative ATP-depr                                | DHX33              |         |
|     | 22.4977 | NaN     | 21.7925 | NaN     | 21.9686 | NaN     | Q9H5Z1;Q5THR1-Q9H5Z1;Q5THR1                      | Probable ATP-dep                                 | DHX35              |         |
|     | 24.0309 | NaN     | 23.6438 | 24.1109 | 23.4202 | 23.4382 | NaN     | NaN     | NaN     | 24.122  | 23.7906 | 24.0556 | Q9H2U1;Q9H2U1-Q9H2U1;Q9H2U1                      | ATP-dependent R                                  | DHX36              |         |
|     | 24.2006 | 23.157  | 23.8366 | 23.9592 | 23.4989 | 23.6934 | 23.7759 | 24.1815 | NaN     | 24.4576 | 24.0595 | 24.0148 | Q92620;Q92620-Q92620;Q92620-2                    | Pre-mRNA-splicing                                | DHX38              |         |
| NaN | NaN     | NaN     | 23.0115 | NaN                                              | Q6P158;A0A087W-Q6P158                            | Putative ATP-depr  | DHX57   |
|     | 21.865  | NaN                                              | Q14562;F5H658-Q14562;F5H658                      | ATP-dependent R    | DHX8    |
|     | 31.1834 | 29.6143 | 30.1179 | 31.2315 | 30.1894 | 30.4055 | 29.2533 | 29.7285 | 29.0842 | 30.8625 | 30.7722 | 30.1224 | Q08211;Q08211-Q08211                             | ATP-dependent R                                  | DHX9               |         |
|     | 23.3059 | NaN     | NaN     | 23.0976 | NaN     | NaN     | NaN     | NaN     | NaN     | 23.6205 | 23.334  | NaN     | Q9NR28;Q9NR28-Q9NR28;Q9NR28                      | Diablo homolog r                                 | DIABLO             |         |
|     | 28.6126 | 28.2309 | 28.4779 | 28.4123 | 28.3598 | 28.4772 | 28.6186 | 28.7184 | 28.4493 | 28.4902 | 28.6014 | 28.6658 | O60610;A0A0G2J-O60610;A0A0G2J                    | Protein diaphano                                 | DIAPH1             |         |
|     | 27.0781 | 25.9518 | 26.6996 | 26.8682 | 25.8313 | 26.2621 | 26.2664 | 26.3374 | 25.9496 | 26.6583 | 26.0759 | 25.0359 | Q9NSV4;Q9NSV4-Q9NSV4;Q9NSV4                      | Protein diaphano                                 | DIAPH3             |         |
|     | 23.5868 | NaN     | 23.1817 | 23.3198 | 22.7459 | NaN                                              | Q9UPY3;Q9UPY3-Q9UPY3;Q9UPY3                      | Endoribonuclease   | DICER1  |
|     | 26.4077 | 26.0458 | 26.3567 | 26.4276 | 26.5995 | 27.4188 | NaN                                              | Q9BTC0;Q9BTC0-Q9BTC0;Q9BTC0                      | Death-inducer obl  | DIDO1   |
|     | 25.9558 | 24.2381 | 24.7422 | 25.9952 | 24.6823 | 24.8803 | 24.6081 | NaN     | NaN     | 24.8104 | 24.8976 | NaN     | Q9UNQ2;A0A0C4-Q9UNQ2;A0A0C4                      | Probable dimethy                                 | DIMT1              |         |
|     | 24.5811 | 24.1666 | 25.3176 | 24.6273 | 24.263  | 25.1822 | 24.7414 | NaN     | 24.4558 | 25.307  | 24.8742 | 25.0948 | Q14689;Q14689-Q14689;Q14689-6                    | Disco-interacting                                | DIP2A              |         |
|     | 28.4477 | 28.3453 | 28.8737 | 28.3109 | 28.2175 | 29.0349 | 28.2187 | 27.1747 | 28.4016 | 28.8989 | 28.4644 | 28.6672 | Q9P265;H0YIU5-Q9P265                             | Disco-interacting                                | DIP2B              |         |
|     | 24.5998 | 25.3489 | 25.4235 | 25.735  | 25.8537 | NaN     | NaN     | NaN     | NaN     | 25.4103 | 26.3108 | 25.1966 | Q9Y2E4;E7EPU2-Q9Y2E4;E7EPU2                      | Disco-interacting                                | DIP2C              |         |
|     | 27.0115 | 25.6844 | 26.0459 | 26.9646 | 26.4245 | 26.6683 | 25.3522 | 23.7687 | 23.5384 | 26.9714 | 26.315  | 26.1263 | Q9Y2L1;G3V1J5-Q9Y2L1;G3V1J5;Q                    | Exosome complex                                  | DIS3               |         |
|     | 22.5895 | NaN     | NaN     | 22.457  | NaN                                              | Q8TF46;Q8TF46-3-Q8TF46;Q8TF46-3                  | DIS3-like exonucle | DIS3L   |
|     | 24.5321 | 23.7719 | 24.2413 | 24.4863 | 24.1633 | 24.2757 | 24.1499 | NaN     | 24.1708 | 24.5655 | 23.9777 | 24.4515 | Q8IYB7;H7C440-Q8IYB7;H7C440;Q                    | DIS3-like exonucle                               | DIS3L2             |         |
| NaN | NaN     | NaN     | 21.4814 | NaN                                              | A7MBM2                                           | Protein dispatcher | DISP2   |
|     | 28.2236 | 27.249  | 27.9393 | 29.0471 | 28.1609 | 28.0703 | 25.8889 | 25.9518 | 25.8428 | 26.986  | 27.3274 | 27.0207 | O60832;O60832-Q60832;O60832-2                    | H/ACA ribonucleo                                 | DKC1               |         |
|     | 23.6437 | 27.2368 | 26.1848 | 23.4012 | 26.0459 | 24.515  | 28.9887 | 29.3273 | 28.387  | 23.2043 | 25.7661 | 26.254  | O94907;Q9UBU2-Q94907                             | Dickkopf-related r                               | DKK1               |         |
|     | 24.9619 | 25.2756 | 25.1356 | 25.6036 | 25.454  | 25.4501 | 24.4814 | 24.9332 | 26.6013 | 23.4246 | 24.3588 | 25.4565 | P10515;H0YDD4-P10515;H0YDD4-E                    | Dihydrolipoyllys                                 | DLAT               |         |
|     | 26.4609 | 28.0879 | 26.9357 | 26.3403 | 27.7981 | 26.8454 | 26.6375 | 28.1388 | 28.7614 | 25.9855 | 26.7162 | 27.7436 | P09622;E9PEX6-P09622;E9PEX6;P                    | Dihydrolipoyl deh                                | DL                 |         |
|     | 28.1881 | 28.5313 | 28.7864 | 28.3271 | 28.4762 | 29.0191 | 29.0309 | 27.9369 | 28.0021 | 29.3849 | 28.6847 | 28.4929 | Q12959-2;A0A0C-Q12959-2;A0A0C                    | Disks large homol                                | DLG1               |         |
| NaN | NaN     | 23.4566 | 23.7716 | 22.7266 | 23.4909 | 24.0682 | NaN     | NaN     | NaN     | 23.3224 | NaN     | NaN     | Q92796;Q92796-Q92796;Q92796-2                    | Disks large homol                                | DLG3               |         |
| NaN | NaN     | NaN     | NaN     | NaN     | NaN     | NaN     | NaN     | NaN     | NaN     | 23.5095 | 24.0015 | NaN     | NaN                                              | Q8TDM6;Q8TDM6-Q8TDM6;Q8TDM6                      | Disks large homol  | DLG5    |



|     |         |         |         |         |         |         |         |         |         |         |         |         |         |                                                            |
|-----|---------|---------|---------|---------|---------|---------|---------|---------|---------|---------|---------|---------|---------|------------------------------------------------------------|
|     | 25.1147 | 24.1798 | 24.2709 | 24.3689 | 24.0674 | 24.2911 | 24.3305 | 24.105  | NaN     |         | 23.808  | 23.8935 | 23.4095 | Q15398;Q15398-; Q15398;Q15398-; Disks large-associ: DLGAP5 |
|     | 26.3395 | 27.4404 | 26.7807 | 27.047  | 27.3387 | 26.956  | 26.2202 | 27.7387 |         | 28.681  | 25.5977 | 26.4215 | 27.2961 | P36957;P36957-2; P36957;P36957-2 Dihydropolypyllysin DLST  |
| NaN |         | NaN     |         | 24.4724 | 23.7515 | NaN     | P11532;A0A087W P11532;A0A087W Dystrophin DMD               |
|     | 21.4109 | NaN     |         | NaN     | NaN     | NaN     | Q9NVR5;Q9NVR5 Q9NVR5;Q9NVR5- Protein kintoun DAAF2         |
|     | 25.5252 | 24.028  | 24.5837 | 25.3657 | 23.6332 | 24.5139 | NaN     | NaN     | NaN     |         | 24.8261 | 25.1027 | 24.2888 | Q86Y56;Q86Y56-2 Q86Y56;Q86Y56-2 Dynein assembly I DAAAF5   |
| NaN |         | NaN     |         | NaN     | NaN     | 25.7399 | Q9P225;Q9P225-; Q9P225;Q9P225-; Dynein heavy cha DNAH2     |
| NaN |         | NaN     |         | NaN     | NaN     | 25.5179 | Q96JB1;A0A075B; Q96JB1;A0A075B; Dynein heavy cha DNAH8     |
|     | 29.3475 | 28.8848 | 28.8483 | 29.5416 | 28.6112 | 29.2058 | 29.9473 | 29.4815 | 29.3692 | 29.7521 | 29.2407 | 29.1162 | 29.1162 | P31689;P31689-2 P31689;P31689-2 Dnal homolog sut DNAJA1    |
|     | 29.0021 | 27.8633 | 27.9895 | 28.6759 | 27.6891 | 28.1611 | 29.2557 | 28.2962 | 28.2874 | 29.2984 | 28.8577 | 28.6092 | 28.6092 | O60884;A0A087W O60884 Dnal homolog sut DNAJA2              |
|     | 25.4181 | 25.5842 | 24.9587 | 25.8835 | 26.2726 | 25.3547 | 23.3737 | 24.5231 | 25.2002 | 24.3685 | 25.4703 | NaN     |         | Q96EY1;Q96EY1-2 Q96EY1;Q96EY1-2 Dnal homolog sut DNAJA3    |
| NaN |         | 24.1871 | 24.6047 | NaN     | Q8WW22;Q8WW Q8WW22;Q8WW Dnal homolog sut DNAJA4            |
|     | 28.2828 | 28.3399 | 27.9713 | 27.6958 | 28.1241 | 28.058  | 28.2673 | 28.6552 | 28.6066 | 27.8137 | 28.2198 | 28.5475 | 28.5475 | P25685;P25685-2; P25685;P25685-2; Dnal homolog sut DNAJB1  |
|     | 26.9427 | 26.9523 | 26.3921 | 26.5428 | 26.2587 | 26.215  | 26.043  | 26.6645 | 25.7531 | 25.5017 | 25.1768 | 24.6502 | 24.6502 | Q9UBS4;H7C2Y5 Q9UBS4;H7C2Y5 Dnal homolog sut DNAJB11       |
|     | 21.918  | NaN     | Q9NXW2;V9GYN7 Q9NXW2;V9GYN7 Dnal homolog sut DNAJB12       |
|     | 22.827  | NaN     | P25686;C9JRD2;C P25686;C9JRD2;C Dnal homolog sut DNAJB2    |
|     | 24.2994 | 24.5851 | 24.1319 | 23.7524 | 25.1946 | 24.211  | 24.3316 | 24.4312 | 24.8031 | 24.2205 | 24.2723 | 25.2304 | 25.2304 | Q9UDY4;C9JUL4 Q9UDY4 Dnal homolog sut DNAJB4               |
|     | 23.8696 | 24.6374 | 24.187  | 24.4637 | 24.1295 | 24.2023 | 23.8763 | 24.2647 | NaN     | 24.1133 | 23.8924 | 23.5516 | 23.5516 | O75190;O75190-; O75190;O75190-3 Dnal homolog sut DNAJB6    |
|     | 22.8812 | 23.7593 | 23.2215 | 23.0478 | 23.8008 | 23.4247 | NaN     | 23.9357 | 24.1865 | 22.8266 | 23.5141 | 23.7642 | 23.7642 | Q8IXB1;Q8IXB1-2; Q8IXB1;Q8IXB1-2; Dnal homolog sut DNAJC10 |
|     | 26.0535 | 25.5614 | 26.057  | 26.2896 | 25.8679 | 26.1842 | 25.5118 | 25.8227 | 25.9402 | 25.6904 | 25.7704 | 26.0557 | 26.0557 | O75165;H0Y8Q2;I O75165 Dnal homolog sut DNAJC13            |
|     | 23.8066 | NaN     | NaN     | 24.4206 | NaN     | NaN     | NaN     | NaN     | NaN     | 24.1754 | NaN     | NaN     | NaN     | Q99543;Q99543-; Q99543;Q99543-2 Dnal homolog sut DNAJC2    |
|     | 25.7815 | 26.5869 | 25.9577 | 25.5831 | 26.1402 | 25.8192 | 26.5782 | 27.0476 | 26.738  | 25.9462 | 25.726  | 25.5931 | 25.5931 | Q13217;X6R9L0 Q13217;X6R9L0 Dnal homolog sut DNAJC3        |
|     | 25.8201 | 24.316  | 24.9727 | 25.722  | 23.6638 | 25.5107 | 24.8049 | NaN     | 23.8817 | 25.8606 | 24.4447 | NaN     |         | Q9H3Z4;Q9H3Z4- Q9H3Z4;Q9H3Z4-; Dnal homolog sut DNAJC5     |
|     | 27.0592 | 26.521  | 26.2555 | 26.7465 | 26.4262 | 26.1567 | 26.4414 | 26.3705 | 26.2131 | 26.9631 | 26.854  | 26.9303 | 26.9303 | Q99615;Q99615-; Q99615;Q99615-2 Dnal homolog sut DNAJC7    |
|     | 23.9622 | 25.2745 | 24.8711 | 24.1096 | 25.3971 | 24.9841 | 24.3909 | 24.2673 | 24.4838 | 24.8237 | 25.6463 | 25.9465 | 25.9465 | O75937;S4R3J5 O75937 Dnal homolog sut DNAJC8               |
|     | 25.8227 | 25.8848 | 25.9574 | 25.6121 | 25.6714 | 25.9475 | 25.8095 | 25.4536 | 25.4643 | 26.4935 | 26.5356 | 26.3633 | 26.3633 | Q8WXX5 Q8WXX5 Dnal homolog sut DNAJC9                      |
|     | 24.1951 | 24.5582 | 25.5406 | 24.4425 | 24.6009 | 25.598  | 24.3666 | 24.4087 | NaN     | 24.4595 | 24.513  | 24.2449 | 24.2449 | P49184;A6QRJ0;C P49184;A6QRJ0;C Deoxyribonucleas DNASE111  |
|     | 22.954  | 24.9751 | 23.8434 | 22.9532 | 24.2923 | NaN     | 24.7934 | 24.4197 | 25.0259 | 23.2516 | 23.1398 | NaN     |         | O00115;K7ENE5;C O00115;K7ENE5;C Deoxyribonucleas DNASE2    |
|     | 22.4696 | 22.4243 | 22.7151 | 22.1766 | NaN     | Q05193;A0A0D9S Q05193;A0A0D9S Dynamin-1 DNM1               |
|     | 27.6299 | 26.6867 | 26.8789 | 27.2584 | 27.14   | 26.7165 | 26.9815 | 26.6012 | 26.0854 | 27.3695 | 27.4594 | 25.6077 | 25.6077 | O00429-4;O0042; O00429-4;O0042; Dynamin-1-like pr DNM1L    |
|     | 28.4109 | 28.2227 | 28.237  | 28.3846 | 28.1751 | 28.2826 | 28.1199 | 28.2865 | 27.992  | 28.5345 | 28.3378 | 28.2033 | 28.2033 | P50570-2 P50570-2 Dynamin-2 DNM2                           |
| NaN |         | NaN     | NaN     | 20.8933 | NaN     | P50570-3;K7EMQ P50570-3 Dynamin-2 DNM2                     |
|     | 26.1942 | 25.0982 | 25.8816 | 26.3711 | 25.4725 | 25.8091 | 25.829  | 25.3961 | 25.9471 | 25.491  | 25.6094 | 25.6282 | 25.6282 | Q6XZF7;Q6XZF7-2 Q6XZF7;Q6XZF7-2 Dynamin-binding DNMBP      |
|     | 26.8606 | 24.4352 | 25.7078 | 26.4298 | 24.4898 | 25.0763 | 25.6214 | 23.5401 | 21.6635 | 25.9924 | 25.7539 | NaN     |         | P26358;P26358-2 P26358;P26358-2; DNA (cytosine-5)- DNMT1   |
|     | 24.2597 | 24.3651 | 24.4569 | 24.0955 | 24.9606 | 24.435  | 24.2811 | 24.4451 | 24.105  | 24.5051 | 24.5926 | 24.5333 | 24.5333 | Q9ULA0;E7EMB6; Q9ULA0;E7EMB6; Aspartyl aminope DNPEP       |
|     | 24.5931 | 24.3027 | 24.6387 | 24.5523 | 24.6448 | 24.5052 | 25.0097 | 25.0311 | NaN     | 25.1591 | 25.3169 | 25.2251 | 25.2251 | O43598;H0Y8X4;C O43598;H0Y8X4;C 2-deoxynucleosid DNPH1     |
|     | 24.4596 | 23.6383 | 23.6764 | 24.7009 | 23.8036 | 24.2697 | NaN     | NaN     | NaN     | 23.4561 | 24.4244 | NaN     |         | Q9H147;H7C1M5; Q9H147;H7C1M5; Deoxynucleotidylt DNTTIP1    |
|     | 23.0767 | NaN     | 22.5201 | 23.7155 | 22.5386 | NaN     | NaN     | 23.5561 | NaN     | NaN     | NaN     | NaN     | NaN     | Q5QJ6;J3KP30;E Q5QJ6;J3KP30 Deoxynucleotidylt DNTTIP2      |
|     | 26.1665 | 26.1579 | 26.0321 | 25.9375 | 25.9961 | 26.0087 | 25.6723 | NaN     | 27.42   | 26.5823 | 25.9231 | 24.5341 | 24.5341 | Q14185;A0A096L Q14185;A0A096L Dedicator of cytol DOCK1     |
|     | 25.7452 | 25.7668 | 26.5292 | 25.7951 | 26.1453 | 26.699  | 27.0628 | 26.597  | 26.1324 | 28.2506 | 27.6506 | 27.4055 | 27.4055 | Q96BY6;Q96BY6-; Q96BY6;Q96BY6-; Dedicator of cytol DOCK10  |
|     | 25.452  | 23.9706 | 24.5949 | 25.0416 | 24.663  | 24.7383 | 24.4435 | 25.227  | 24.7844 | 24.9357 | 24.4633 | 24.2129 | 24.2129 | Q8N110;H0Y599;C Q8N110;H0Y599;C Dedicator of cytol DOCK4   |
|     | 25.6786 | 24.8731 | 25.4581 | 25.4232 | 24.8095 | 25.3201 | 24.8726 | 24.8344 | 25.0689 | 25.4001 | 24.7234 | 24.8189 | 24.8189 | Q9H7D0;H0Y7N4; Q9H7D0;H0Y7N4 Dedicator of cytol DOCK5      |
|     | 28.1083 | 27.5422 | 28.0635 | 28.2168 | 28.0072 | 28.2606 | 27.5977 | 27.9478 | 27.9086 | 27.942  | 28.0708 | 28.1176 | 28.1176 | Q96N67;Q96N67- Q96N67;Q96N67- Dedicator of cytol DOCK7     |
| NaN |         | NaN     | 22.1085 | NaN     | Q9BZ29-5;A0A0A; Q9BZ29-5;A0A0A; Dedicator of cytol DOCK9   |
|     | 28.4264 | 28.1015 | 28.4878 | 28.1305 | 27.8608 | 28.2926 | 28.1825 | 27.479  | 27.8459 | 28.399  | 28.0618 | 27.8445 | 27.8445 | Q9BZ29-4;Q9BZ2; Q9BZ29-4;Q9BZ2; Dedicator of cytol DOCK9   |
|     | 23.9107 | 24.0058 | 23.7967 | 24.0711 | 23.3914 | 23.2118 | NaN     | NaN     | NaN     | 23.1484 | 23.4535 | NaN     |         | Q9BU89;K7ERU8;I Q9BU89;K7ERU8;I Deoxyhypusine h; DOHH      |
| NaN |         | NaN     | NaN     | 21.659  | NaN     | Q99704;Q99704-; Q99704;Q99704-2 Docking protein 1 DOK1     |
| NaN |         | NaN     | 23.026  | 23.6147 | NaN     | Q9H3H5;Q9H3H5 Q9H3H5;Q9H3H5 UDP-N-acetylgluc DPAGT1        |
|     | 23.1489 | 23.8205 | 23.2394 | 23.0747 | 22.6753 | 23.3996 | 23.2605 | 23.3069 | 23.7684 | 23.5559 | 23.6695 | 23.4819 | 23.4819 | Q9H2P9;A0A087V Q9H2P9;A0A087V Diphthine synthas DPH5       |
|     | 24.4241 | 24.0605 | 24.2747 | 24.8746 | 24.2237 | 24.6464 | 24.5612 | 23.7191 | NaN     | 24.4182 | 24.2859 | NaN     |         | O60762;Q5QPK2;I O60762;Q5QPK2;I Dolichol-phosphat DPM1     |
| NaN |         | NaN     | 22.237  | 22.237  | Q9P2X0;Q9P2X0-; Q9P2X0;Q9P2X0-; Dolichol-phosphat DPM3     |
|     | 27.3871 | 28.4513 | 27.9608 | 27.2145 | 28.1862 | 27.9872 | 28.3962 | 28.2353 | 28.4497 | 28.0626 | 28.017  | 28.6939 | 28.6939 | Q9NY33;G3V1D3; Q9NY33;G3V1D3; Dipeptidyl peptid; DPP3      |
|     | 27.1647 | 26.8204 | 26.8621 | 26.3849 | 26.4004 | 26.5115 | 26.9246 | 26.8764 | 26.0836 | 26.3865 | 26.373  | 26.1792 | 26.1792 | Q86T12;Q86T12-2; Q86T12;Q86T12-2; Dipeptidyl peptid; DPP9  |
|     | 25.6301 | 26.7218 | 25.9002 | 25.735  | 26.6882 | 26.0333 | 25.7383 | NaN     | NaN     | NaN     | 26.3117 | NaN     | NaN     | Q9C005 Q9C005 Protein dpy-30 ho DPY30                      |
|     | 23.9168 | 23.9466 | NaN     | NaN     | 23.8378 | NaN     | Q12882 Q12882 Dihydropyrimidin DYPD                        |
|     | 29.6088 | 29.9018 | 29.7028 | 28.9271 | 29.5236 | 29.5675 | 29.308  | 30.0811 | 29.2798 | 29.4213 | 29.3672 | 29.4333 | 29.4333 | Q16555;Q16555-; Q16555;Q16555-2 Dihydropyrimidin; DPLYL2   |
|     | 23.52   | 24.0654 | 23.9684 | 23.7694 | 24.3859 | 24.0331 | 23.8755 | 24.3024 | 24.4429 | 24.0309 | 24.6253 | 25.1437 | 25.1437 | Q01658 Q01658 Protein Dr1 DR1                              |
|     | 22.6619 | 22.5263 | 23.5412 | 23.6625 | 22.483  | NaN     | 22.6868 | NaN     | NaN     | 23.9546 | 23.3062 | 24.3972 | 24.3972 | Q14919;Q14919-; Q14919;Q14919-2 Dr1-associated co DRAP1    |
|     | 26.5416 | 25.4978 | 25.6724 | 26.2173 | 25.7058 | 25.4941 | 25.8527 | 25.8436 | 25.5831 | 26.1462 | 26.0828 | 25.7044 | 25.7044 | Q9Y295;H0YI06;I Q9Y295 Developmentally- DRG1               |
|     | 26.559  | 25.6435 | 26.259  | 26.426  | 25.8797 | 25.8583 | 25.3234 | 25.1422 | 25.3255 | 26.8078 | 26.7313 | 25.8431 | 25.8431 | P55039;A8MZF9;I P55039;A8MZF9;I Developmentally- DRG2      |
| NaN |         | NaN     | NaN     | NaN     | NaN     | NaN     | 23.5708 | NaN     | NaN     | NaN     | NaN     | NaN     | NaN     | Q08554;Q08554-; Q08554;Q08554-2 Desmocollin-1 DSC1         |



|     |         |         |         |         |         |         |         |         |         |         |         |         |                                   |                               |                     |              |      |
|-----|---------|---------|---------|---------|---------|---------|---------|---------|---------|---------|---------|---------|-----------------------------------|-------------------------------|---------------------|--------------|------|
| NaN | NaN     | NaN     |         | 22.601  | NaN     | NaN     |         | 24.2482 | 24.007  | 23.929  | NaN     | NaN     | NaN                               | Q02413;Q02413-7               | Q02413              | Desmoglein-1 | DSG1 |
|     | 27.6155 | 28.1367 | 28.341  | 27.6348 | 27.9171 | 28.5215 | 28.3165 | 28.2275 | 28.7222 | 28.8417 | 28.179  | 28.4572 | Q14126;J3K5I6                     | Q14126                        | Desmoglein-2        | DSG2         |      |
| NaN | NaN     | NaN     | NaN     | 21.6351 | NaN                               | Q9H410;Q5JW54; Q9H410;Q5JW54; | Kinetochore-assor   | DSN1         |      |
|     | 26.2065 | 25.7666 | 25.5626 | 26.6399 | 26.0476 | 25.2429 | 27.7763 | 24.8889 | 25.9971 | 22.8012 | 25.2288 | NaN     | P15924;P15924-3; P15924;P15924-3; | Desmoplakin                   | DSP                 |              |      |
|     | 27.242  | 26.5769 | 27.0338 | 26.915  | 26.7965 | 26.9092 | 26.8994 | 27.0466 | 24.5408 | 27.404  | 26.8171 | 26.5415 | E9PEB9;F6QM17;C E9PEB9;F6QM17;C   | Dystonin                      | DST                 |              |      |
| NaN | NaN     | NaN     | NaN     | NaN     | NaN     | NaN     | NaN     | NaN     | 24.5119 | NaN     | NaN     | NaN     | Q03001-13;A0A0J Q03001-13         | Dystonin                      | DST                 |              |      |
| NaN | NaN     | NaN     | NaN     | NaN     | NaN     | NaN     | NaN     | NaN     | NaN     | NaN     | NaN     | 24.198  | Q03001-3;Q6P0NI Q03001-3;Q6P0NI   | Dystonin                      | DST                 |              |      |
|     | 26.8392 | 27.4215 | 26.9936 | 26.5605 | 26.9059 | 27.0168 | 26.3165 | 27.0023 | 27.64   | 27.6917 | 27.919  | 28.2974 | P60981;P60981-2; P60981;P60981-2; | Destrin                       | DSTN                |              |      |
|     | 25.5734 | 26.2231 | 25.737  | 25.7132 | 26.1281 | 25.607  | 25.9892 | NaN     | 25.9834 | 26.0601 | 26.0995 | NaN     | Q8TEA8;A0A087W Q8TEA8;A0A087W     | D-tyrosyl-tRNA(Ty             | DTD1                |              |      |
|     | 23.4403 | 23.3539 | 22.9145 | 22.8347 | 23.3644 | 23.2026 | NaN     | NaN     | NaN     | 23.9858 | 24.1826 | NaN     | Q9NZJ0;F5GZ90;C Q9NZJ0;F5GZ90     | Denticleless prote            | DTL                 |              |      |
|     | 22.4815 | NaN     | 23.8499 | 23.1201 | 23.0246 | 23.679  | 23.0485 | NaN     | NaN     | 24.309  | 23.4486 | 23.5982 | Q86UW9;E7ET89; Q86UW9;E7ET89;     | Probable E3 ubiq              | DTX2                |              |      |
| NaN | NaN     | NaN     | NaN     | 19.7265 | NaN     | Q8TDB6                            | Q8TDB6                        | E3 ubiquitin-prote  | DTX3L        |      |
|     | 28.3969 | 27.7582 | 27.764  | 27.9742 | 27.8272 | 27.8693 | 27.5968 | 27.8473 | 27.4331 | 27.9749 | 28.0884 | 27.5906 | P23919;P23919-2; P23919;P23919-2; | Thymidylate kinas             | DTYMK               |              |      |
|     | 22.9915 | 21.8379 | 21.8397 | 22.1064 | NaN     | NaN     | NaN     | NaN     | NaN     | 22.319  | 22.7557 | NaN     | Q9NX74;E7EUN9; Q9NX74;E7EUN9;     | tRNA-dihydrourid              | DUS2                |              |      |
|     | 23.9943 | 22.974  | 22.9914 | 24.2415 | 23.4458 | 23.1272 | NaN     | NaN     | NaN     | 23.1298 | 24.0964 | NaN     | Q96G46;Q96G46- Q96G46;Q96G46-     | tRNA-dihydrourid              | DUS3L               |              |      |
|     | 22.4329 | NaN     | NaN     | 21.3438 | NaN     | P28562                            | P28562                        | Dual specificity pr | DUSP1        |      |
|     | 21.4757 | NaN     | NaN     | 21.183  | NaN     | O75319;H7COE6;C O75319;H7COE6;C   | RNA/RNP comple                | DUSP11              |              |      |
|     | 23.4564 | 23.4294 | 22.9842 | 22.971  | 23.1698 | 22.6949 | 23.042  | 23.5787 | NaN     | 23.2045 | 23.6173 | 23.5824 | Q9UNI6;V9GYV5;Q9UNI6              | Dual specificity pr           | DUSP12              |              |      |
| NaN | NaN     | NaN     | NaN     | NaN     | NaN     | NaN     | NaN     | NaN     | NaN     | 22.4656 | 23.3564 | NaN     | Q9BVJ7                            | Q9BVJ7                        | Dual specificity pr | DUSP23       |      |
|     | 22.9326 | 23.4704 | 23.5791 | 23.4777 | 23.5571 | 23.4543 | NaN     | NaN     | NaN     | 23.3878 | NaN     | 23.887  | P51452;K7ES89;P P51452;K7ES89;P   | Dual specificity pr           | DUSP3               |              |      |
| NaN | NaN     | NaN     | NaN     | NaN     | NaN     | NaN     | NaN     | NaN     | NaN     | NaN     | NaN     | 22.296  | Q13115                            | Q13115                        | Dual specificity pr | DUSP4        |      |
|     | 26.4969 | 28.1099 | 27.2803 | 26.2695 | 27.7022 | 27.086  | 27.6044 | 28.4808 | 28.058  | 27.6173 | 28.155  | 28.7175 | P33316;P33316-2; P33316;P33316-2; | Deoxyuridine 5-tri            | DUT                 |              |      |
|     | 24.5406 | 24.2657 | 24.6406 | 24.2299 | 24.2975 | 24.2142 | 23.9981 | NaN     | NaN     | 24.2081 | NaN     | 23.6454 | O14641;J3L2N2;J3 O14641;J3L2N2;J3 | Segment polarity              | DVL2                |              |      |
|     | 33.0406 | 32.0403 | 32.5715 | 33.0396 | 32.3462 | 32.6701 | 32.6361 | 32.8802 | 32.6844 | 33.0673 | 32.8188 | 32.7007 | Q14204;H0YJ21 Q14204              | Cytoplasmic dyne              | DYNC1H1             |              |      |
|     | 26.9851 | 27.2194 | 26.806  | 26.5049 | 27.3318 | 26.8727 | 27.3371 | 27.9629 | 27.8198 | 26.6385 | 27.1418 | 27.5483 | Q13409-3;Q1340F Q13409-3;Q1340F   | Cytoplasmic dyne              | DYNC1I2             |              |      |
|     | 28.074  | 28.1923 | 27.9242 | 28.0451 | 28.2229 | 27.9788 | 28.2243 | 29.0151 | 28.1342 | 28.6716 | 28.6928 | 28.3999 | Q9Y6G9;E9PHI6;C Q9Y6G9;E9PHI6     | Cytoplasmic dyne              | DYNC1I11            |              |      |
|     | 26.1327 | 26.4462 | 26.3232 | 25.9773 | 26.2945 | 26.1153 | 26.1878 | 27.0967 | 26.3813 | 26.025  | 26.229  | 26.3434 | O43237;O43237-2 O43237;O43237-2   | Cytoplasmic dyne              | DYNC1I12            |              |      |
|     | 27.2117 | 24.6585 | 24.7208 | 26.4091 | 24.4516 | 24.2359 | 26.4811 | NaN     | NaN     | 26.0362 | 25.1647 | 23.2297 | P63167;Q96FJ2;F P63167;Q96FJ2;F   | Dynein light chain            | DYNLL1;DYNLL2       |              |      |
|     | 27.4504 | 27.556  | 26.9602 | 26.4544 | 27.0331 | 26.9273 | 27.9267 | 27.2705 | 27.1329 | 26.7087 | 27.2732 | 27.0625 | Q9NP97;B1AKR6;Q9NP97;B1AKR6;      | Dynein light chain            | DYNLRB1;DYNLRB2     |              |      |
|     | 25.1746 | NaN     | NaN     | 24.0914 | NaN     | NaN     | 23.4779 | NaN     | NaN     | NaN     | NaN     | NaN     | P63172;Q5VTU3 P63172;Q5VTU3       | Dynein light chain            | DYNLT1              |              |      |
|     | 31.682  | 31.3367 | 31.9373 | 32.1013 | 31.6268 | 32.1548 | 29.7782 | 28.9125 | 29.0111 | 30.4589 | 29.5246 | 28.9816 | O75923-8;O75923 O75923-8;O75923   | Dysferlin                     | DYSF                |              |      |
| NaN | NaN     | NaN     | NaN     | NaN     | NaN     | NaN     | NaN     | 26.0231 | NaN     | NaN     | NaN     | NaN     | A0AVK6                            | A0AVK6                        | Transcription fact  | E2F8         |      |
|     | 23.1582 | NaN     | 22.5707 | 23.2881 | 22.632  | NaN     | NaN     | NaN     | NaN     | 22.6305 | 22.9428 | NaN     | Q5JPH6;H3BTB7;C Q5JPH6;H3BTB7;C   | Probable glutama              | EARS2               |              |      |
| NaN | NaN     | NaN     | NaN     | NaN     | NaN     | NaN     | 25.9937 | NaN     | NaN     | NaN     | NaN     | NaN     | Q9HAK2;B7Z934 Q9HAK2;B7Z934       | Transcription fact            | EBF2                |              |      |
|     | 25.5584 | 24.8458 | 24.3508 | 25.3107 | 24.8464 | 24.5539 | NaN     | NaN     | NaN     | 23.6601 | 25.2433 | 24.5085 | Q99848;H7C2Q8 Q99848;H7C2Q8       | Probable rRNA-pr              | EBNA1BP2            |              |      |
| NaN | NaN     | NaN     | NaN     | 25.6354 | NaN     | NaN     | NaN     | NaN     | NaN     | 25.8808 | NaN     | NaN     | Q15125;C9J719;C Q15125;C9J719;C   | 3-beta-hydroxyste             | EBP                 |              |      |
|     | 23.9729 | 23.1639 | 23.3457 | 24.0429 | 23.0376 | 24.5296 | 23.6319 | NaN     | NaN     | 24.1094 | 24.6411 | NaN     | O95905;O95905-3 O95905;O95905-3   | Protein SGT1                  | ECD                 |              |      |
|     | 27.9252 | 28.396  | 29.0619 | 28.3461 | 28.5639 | 29.2666 | 27.8934 | 27.5381 | 28.1246 | 28.6971 | 28.1272 | 28.0617 | P42892;P42892-3; P42892;P42892-3; | Endothelin-conve              | EC1                 |              |      |
|     | 26.4278 | 27.7802 | 27.0671 | 26.674  | 27.9632 | 27.0765 | 25.3997 | 27.4472 | 28.2827 | 25.4208 | 26.5802 | 27.2006 | Q13011;M0R248;Q13011              | Delta(3,5)-Delta(2            | ECH1                |              |      |
|     | 23.9622 | 24.8704 | 24.1204 | 23.5982 | 24.3021 | 23.9322 | 24.4499 | NaN     | NaN     | 23.9629 | 23.9603 | NaN     | Q9NTX5;Q9NTX5- Q9NTX5;Q9NTX5-     | Ethylmalonyl-CoA              | ECHDC1              |              |      |
|     | 25.7489 | 27.3364 | 26.2913 | 25.7119 | 27.0829 | 26.3776 | 25.8476 | 26.865  | 27.4579 | 25.5808 | 26.3232 | 26.483  | P30084                            | P30084                        | Enoyl-CoA hydrat    | ECHS1        |      |
|     | 24.757  | 26.6931 | 24.8118 | 24.5776 | 26.4796 | 24.9676 | 24.1205 | NaN     | 26.3098 | 24.1815 | 25.4164 | 25.2996 | P42126;P42126-2; P42126;P42126-2; | Enoyl-CoA delta               | EC1;DCI             |              |      |
|     | 26.4605 | 26.7415 | 26.385  | 26.6232 | 26.8181 | 26.2525 | 25.1994 | 25.1046 | 26.3089 | 25.3425 | 25.1841 | 25.229  | O75521;A0A0C4D O75521;A0A0C4D     | Enoyl-CoA delta               | ECI2                |              |      |
|     | 23.6669 | 25.4586 | 23.4658 | 23.486  | 24.852  | 23.4135 | 27.8859 | 27.1588 | 24.7872 | 24.251  | 25.3637 | 23.3134 | Q16610;Q16610-4 Q16610;Q16610-4   | Extracellular matr            | ECM1                |              |      |
|     | 27.8473 | 26.6327 | 27.4347 | 27.8864 | 27.2874 | 27.2454 | 26.6527 | 25.3725 | 26.0593 | 27.3253 | 27.2634 | 27.0141 | Q5VYK3;J3KN16;R Q5VYK3;J3KN16     | Proteasome-assor              | ECM29;KIAA0368      |              |      |
|     | 25.1232 | 24.159  | 25.6195 | 26.0874 | 24.8087 | 25.4253 | 23.6588 | NaN     | 23.4122 | 25.7899 | 25.1614 | 25.5503 | Q9H8V3;Q9H8V3- Q9H8V3;Q9H8V3-     | Protein ECT2                  | ECT2                |              |      |
|     | 25.6539 | 25.2251 | 24.8738 | 25.2815 | 24.7304 | 24.8013 | 24.245  | NaN     | 24.3945 | 25.1247 | 25.1567 | NaN     | Q96F86;H3BPW9;Q96F86              | Enhancer of mRN               | EDC3                |              |      |
|     | 27.2064 | 26.7488 | 26.3085 | 27.025  | 26.6235 | 26.2821 | 25.9665 | 26.348  | 25.5064 | 26.6771 | 26.6269 | 26.0828 | Q6P2E9;Q6P2E9-; Q6P2E9;Q6P2E9-2   | Enhancer of mRN               | EDC4                |              |      |
|     | 25.7445 | 25.9401 | 25.618  | 24.9643 | 25.342  | 25.4807 | 26.0444 | 25.8943 | 25.754  | 26.1923 | 25.9456 | 26.0607 | O60869;O60869-2 O60869;O60869-2   | Endothelial differe           | EDF1                |              |      |
|     | 32.6773 | 33.5566 | 34.2408 | 32.4365 | 33.1191 | 34.2891 | 36.1543 | 35.3465 | 35.0525 | 34.4342 | 33.4721 | 33.2898 | O43854;O43854-2 O43854;O43854-2   | EGF-like repeat ar            | EDIL3               |              |      |
|     | 28.8764 | 28.7974 | 28.165  | 28.3163 | 28.1951 | 27.9707 | 28.0464 | 28.502  | 27.8468 | 27.7776 | 27.6308 | 27.3628 | Q15075                            | Q15075                        | Early endosome a    | EEA1         |      |
|     | 24.0979 | 22.7555 | 23.0682 | 24.029  | 22.8925 | 23.0319 | NaN     | NaN     | NaN     | 23.0446 | 23.5254 | NaN     | O75530;O75530-2 O75530;O75530-2   | Polycarb protein              | EED                 |              |      |
|     | 35.2054 | 34.7137 | 34.7027 | 34.9326 | 34.6705 | 34.7228 | 34.7629 | 34.3554 | 34.1278 | 34.968  | 34.7081 | 34.3619 | P68104;Q5VTE0;A P68104;Q5VTE0;A   | Elongation factor             | EEF1A1;EEF1A1P5     |              |      |
|     | 24.4234 | 24.8567 | 25.059  | 25.1345 | 25.1572 | 25.2835 | 26.5354 | 25.8068 | 25.6616 | 26.747  | 26.4061 | 25.891  | Q05639                            | Q05639                        | Elongation factor   | EEF1A2       |      |
|     | 28.8741 | 28.761  | 28.7165 | 28.6989 | 28.6791 | 28.5101 | 29.4366 | 30.4072 | 29.633  | 29.2691 | 29.7607 | 30.0561 | P24534;C9JZW3;F P24534            | Elongation factor             | EEF1B2              |              |      |
|     | 31.0041 | 31.2638 | 31.3378 | 30.8744 | 31.3106 | 31.0533 | 31.3125 | 32.0952 | 30.9797 | 30.9619 | 31.4101 | 31.4675 | P29692;E9PK01;P P29692;E9PK01;P   | Elongation factor             | EEF1D               |              |      |
| NaN | NaN     | 26.573  | 27.105  | NaN     | 26.9086 | 26.7354 | 26.7403 | NaN     | NaN     | 27.0689 | 27.3447 | NaN     | P29692-3;E9PL71; P29692-3;E9PL71; | Elongation factor             | EEF1D               |              |      |
|     | 28.1411 | 27.3822 | 27.5746 | 28.0949 | 27.502  | 27.5516 | 27.0023 | 27.4213 | 26.7822 | 27.7187 | 27.2826 | 27.0456 | O43324;D6RBD7;O43324;D6RBD7;      | Eukaryotic transla            | EEF1E1;EEF1E1-BL    |              |      |
|     | 31.2055 | 30.9725 | 30.8154 | 31.1041 | 31.2084 | 30.7847 | 31.0883 | 31.3306 | 30.803  | 31.1736 | 31.6394 | 31.1664 | P26641;P26641-2 P26641;P26641-2   | Elongation factor             | EEF1G               |              |      |
|     | 32.9033 | 32.1128 | 32.2597 | 32.541  | 32.3099 | 32.2728 | 32.3734 | 32.2982 | 32.3247 | 32.5828 | 32.5794 | 32.4268 | P13639                            | P13639                        | Elongation factor   | EEF2         |      |



|     |         |         |         |         |         |         |         |         |         |         |         |         |                 |                 |                      |                    |          |
|-----|---------|---------|---------|---------|---------|---------|---------|---------|---------|---------|---------|---------|-----------------|-----------------|----------------------|--------------------|----------|
| NaN | NaN     | 21.348  | 21.809  | NaN     | 000418;H3BRH4   | 000418;H3BRH4   | Eukaryotic elonga    | EEF2K              |          |
|     | 24.2782 | NaN     | 24.1181 | 24.5634 | 24.0415 | 24.1083 | NaN     | NaN     | NaN     | NaN     | 24.0266 | 24.033  | NaN             | P57772;P57772-2 | P57772;P57772-2      | Selenocysteine-sp  | EEFSEC   |
|     | 25.9012 | 26.9436 | NaN     | NaN     | 26.6828 | 25.7947 | 25.6612 | NaN     | NaN     | NaN     | NaN     | NaN     | NaN             | A4FU69;A4FU69-5 | A4FU69;A4FU69-5      | EF-hand calcium-t  | EFCA85   |
|     | 25.7133 | 26.1293 | 26.2527 | 25.5345 | 26.4309 | 26.4605 | 25.799  | 26.1765 | 25.9518 | 25.7716 | 25.8598 | 26.6296 | Q96C19;H0Y4Y4   | Q96C19          | EF-hand domain-c     | EFHD2              |          |
|     | 22.4176 | NaN     | 23.3226 | NaN     | 23.3983 | NaN     | NaN             | P98172          | P98172               | Ephrin-B1          | EFNB1    |
| NaN | NaN     | NaN     | NaN     | NaN     | NaN     | NaN     | NaN     | NaN     | NaN     | NaN     | 20.7921 | NaN     | NaN             | P52799          | P52799               | Ephrin-B2          | EFNB2    |
|     | 26.2497 | 25.8091 | 26.8689 | 26.4668 | 26.4216 | 26.8887 | 26.0567 | 25.2307 | 25.3265 | 27.4578 | 26.3999 | 25.2402 | Q14156;Q14156-2 | Q14156;Q14156-2 | Protein EFR3 hom     | EFR3A              |          |
|     | 26.7351 | 26.0715 | 26.2088 | 26.6108 | 26.4371 | 26.2557 | 26.3458 | 26.3596 | 26.627  | 26.5247 | 26.7708 | 26.6919 | Q72222;Q72222-2 | Q72222;Q72222-2 | Elongation factor    | EFTUD1             |          |
|     | 28.881  | 27.7234 | 28.3118 | 28.8989 | 28.2208 | 28.4174 | 27.1881 | 27.6274 | 27.2405 | 28.4535 | 28.6511 | 28.2693 | Q15029;Q15029-1 | Q15029;Q15029-2 | 116 kDa U5 small     | EFTUD2             |          |
| NaN | NaN     | NaN     | NaN     | NaN     | NaN     | NaN     | 25.559  | NaN     | NaN     | NaN     | NaN     | NaN     | NaN             | Q9UHF1;R4GMT3   | Q9UHF1               | Epidermal growth   | EGFL7    |
|     | 30.2023 | 29.9266 | 30.6313 | 30.3384 | 29.77   | 30.8666 | 30.4087 | 29.6272 | 30.0966 | 31.0034 | 30.4081 | 30.3803 | P00533;E9PFD7;Q | P00533;E9PFD7;Q | Epidermal growth     | EGFR               |          |
|     | 23.8916 | 23.7617 | 23.4275 | 23.6764 | 23.666  | NaN     | NaN     | NaN     | NaN     | 23.3945 | 23.619  | 23.5201 | Q9GZT9;Q9GZT9-  | Q9GZT9;Q9GZT9-  | Egl nine homolog     | EGLN1              |          |
|     | 24.3398 | 24.0696 | 24.6639 | 23.8079 | NaN     | NaN     | NaN     | NaN     | NaN     | 23.7728 | NaN     | 23.6568 | Q8NDI1;Q8NDI1-1 | Q8NDI1;Q8NDI1-1 | EH domain-bindin     | EHBP1              |          |
|     | 25.255  | 26.1483 | 26.1754 | 24.8455 | 26.0588 | 26.2055 | 26.1526 | 26.1682 | 26.2615 | 25.9529 | 26.0446 | 26.4218 | Q8N3D4;E9PIH6;- | Q8N3D4;E9PIH6   | EH domain-bindin     | EHBP1L1            |          |
|     | 30.6398 | 31.1568 | 31.8254 | 30.5721 | 30.9673 | 31.4435 | 31.2919 | 30.3532 | 30.7888 | 31.6073 | 31.3575 | 30.8903 | Q9H4M9;A0A024I  | Q9H4M9;A0A024I  | EH domain-contai     | EHD1               |          |
|     | 26.767  | 26.607  | 27.2794 | 26.956  | 26.4023 | 27.1701 | 27.7622 | 27.0019 | 27.6034 | 27.7882 | 27.5153 | 27.4933 | Q9NZN4;Q9NZN4   | Q9NZN4;Q9NZN4   | EH domain-contai     | EHD2               |          |
| NaN | NaN     | NaN     | 20.2514 | NaN             | Q9NZN3;A0A0C4C  | Q9NZN3;A0A0C4C       | EH domain-contai   | EHD3     |
|     | 30.248  | 30.2534 | 31.133  | 30.0583 | 30.1071 | 30.7839 | 30.0129 | 29.2172 | 29.1495 | 30.3898 | 30.4461 | 29.7109 | Q9H223;A0A087V  | Q9H223;A0A087V  | EH domain-contai     | EHD4               |          |
|     | 26.4257 | 27.4348 | 26.9242 | 26.0685 | 26.8606 | 26.4335 | 26.5264 | NaN     | 26.5222 | 26.4041 | 26.9442 | 27.0329 | P41567;K7EM18;( | P41567;K7EM18;( | Eukaryotic transla   | E1F1;E1F1B         |          |
| NaN | NaN     | NaN     | NaN     | NaN     | NaN     | NaN     | 23.2864 | NaN     | NaN     | NaN     | NaN     | NaN     | NaN             | Q8N9N8;E9PQD0;  | Q8N9N8;E9PQD0;       | Probable RNA-bin   | E1F1AD   |
|     | 27.3489 | 26.1673 | 26.4152 | 27.0027 | 25.6072 | 26.1584 | 26.9505 | 26.4284 | NaN     | 26.6176 | 26.3507 | 25.9479 | P47813;O14602;A | P47813;O14602;A | Eukaryotic transla   | E1F1AX;E1F1AY      |          |
|     | 27.5177 | 27.4128 | 27.1416 | 27.0928 | 27.3486 | 27.0792 | 26.7412 | 27.1746 | 27.2448 | 26.8394 | 27.1656 | 27.5116 | Q9BY44;Q9BY44-  | Q9BY44;Q9BY44-  | Eukaryotic transla   | E1F2A              |          |
|     | 27.5921 | 27.3091 | 27.0987 | 27.5561 | 27.3726 | 27.2351 | 26.5677 | 27.2468 | 27.0105 | 26.4597 | 27.208  | 27.3939 | P19525;P19525-2 | P19525;P19525-2 | Interferon-induce    | E1F2AK2            |          |
|     | 24.5378 | 24.0768 | 24.1116 | 24.0413 | 23.9682 | NaN             | Q9P2K8;Q9P2K8-  | Q9P2K8;Q9P2K8-       | Eukaryotic transla | E1F2AK4  |
|     | 26.5065 | 25.9363 | 25.9295 | 26.4222 | 25.8912 | 25.6598 | 25.3587 | 24.5909 | 25.1436 | 25.6051 | 25.7134 | 25.8519 | Q14232;F5H0D0;( | Q14232;F5H0D0;( | Translation initiati | E1F2B1             |          |
|     | 28.1399 | 27.6538 | 27.7276 | 28.0056 | 28.027  | 27.4797 | 27.2358 | 27.2291 | 26.0878 | 27.572  | 27.5098 | 27.2683 | P49770;G3V5E5;- | P49770;G3V5E5;- | Translation initiati | E1F2B2             |          |
|     | 26.991  | 25.9595 | 26.2649 | 26.9683 | 26.4449 | 26.1885 | 25.5345 | 25.4077 | 24.8956 | 25.7544 | 25.9245 | 26.0032 | Q9NR50;Q9NR50-  | Q9NR50;Q9NR50-  | Translation initiati | E1F2B3             |          |
|     | 27.5107 | 26.2706 | 26.855  | 27.4563 | 26.8022 | 27.0359 | 25.5361 | 25.4483 | 26.0092 | 26.8415 | 26.8448 | 25.0619 | Q9UI10;Q9UI10-2 | Q9UI10;Q9UI10-2 | Translation initiati | E1F2B4             |          |
|     | 26.5571 | 25.0943 | 25.8444 | 26.5881 | 25.3853 | 26.0086 | 24.8781 | 24.9081 | 24.6039 | 25.5452 | 25.4802 | NaN     | Q13144;E9PC74;C | Q13144;E9PC74   | Translation initiati | E1F2B5             |          |
|     | 23.6989 | 22.9705 | 23.1168 | 23.9    | NaN     | 23.1416 | NaN     | NaN     | NaN     | 23.214  | 23.6155 | NaN     | P41214;P41214-2 | P41214;P41214-2 | Eukaryotic transla   | E1F2D              |          |
|     | 30.0392 | 29.4537 | 29.4605 | 29.8387 | 29.4568 | 29.4399 | 29.4883 | 29.8545 | 29.2622 | 29.4599 | 29.706  | 29.526  | P05198;G3V4T5;- | P05198;G3V4T5;- | Eukaryotic transla   | E1F2S1             |          |
|     | 29.093  | 28.3433 | 28.6814 | 28.8813 | 28.668  | 28.645  | 28.3618 | 28.6635 | 28.4827 | 28.7756 | 29.0867 | 28.9893 | P20042          | P20042          | Eukaryotic transla   | E1F2S2             |          |
|     | 29.5428 | 29.6589 | 29.5125 | 29.5367 | 29.9995 | 29.6752 | 29.4634 | 29.9943 | 29.6284 | 29.6827 | 30.1045 | 29.772  | P41091;Q2VIR3;- | P41091;Q2VIR3;- | Eukaryotic transla   | E1F2S3;E1F2S3L     |          |
|     | 31.1981 | 30.7209 | 31.0677 | 31.1217 | 31.1815 | 30.9841 | 31.0677 | 31.5757 | 31.0735 | 31.2355 | 31.4764 | 31.1002 | Q14152;Q14152-2 | Q14152;Q14152-2 | Eukaryotic transla   | E1F3A              |          |
|     | 29.5018 | 28.8855 | 29.6801 | 29.5268 | 29.1684 | 29.6028 | 29.4745 | 30.1466 | 29.303  | 29.9503 | 30.0899 | 29.5296 | P55884;P55884-2 | P55884;P55884-2 | Eukaryotic transla   | E1F3B              |          |
|     | 29.7143 | 29.0857 | 29.5164 | 29.4575 | 29.4321 | 29.4835 | 29.7633 | 30.1044 | 29.6302 | 29.6671 | 29.7725 | 29.8362 | Q99613;Q99613-  | Q99613;Q99613-  | Eukaryotic transla   | E1F3C;E1F3CL       |          |
|     | 28.9346 | 28.5292 | 28.8091 | 28.8557 | 28.7443 | 28.863  | 28.7421 | 29.0929 | 29.0786 | 28.1688 | 28.6881 | 29.0699 | O15371;O15371-2 | O15371;O15371-2 | Eukaryotic transla   | E1F3D              |          |
|     | 29.4289 | 28.942  | 29.254  | 29.5905 | 29.2391 | 29.1727 | 29.1123 | 29.6322 | 29.3352 | 29.6326 | 29.5049 | 29.2281 | P60228;E5RGA2;- | P60228;E5RGA2   | Eukaryotic transla   | E1F3E              |          |
|     | 29.5046 | 29.2231 | 29.1944 | 29.3561 | 29.7075 | 29.3935 | 29.0887 | 29.5404 | 29.1409 | 29.4162 | 29.3206 | 29.1262 | O00303;H0YDT6;- | O00303          | Eukaryotic transla   | E1F3F              |          |
|     | 26.129  | 26.2985 | 26.0535 | 25.7773 | 25.8386 | 25.8635 | 26.2308 | 26.8769 | 26.3056 | 25.6048 | 26.145  | 26.5678 | O75821;K7ER90;K | O75821;K7ER90;K | Eukaryotic transla   | E1F3G              |          |
|     | 28.0733 | 28.2132 | 27.9548 | 28.0356 | 28.2983 | 27.9421 | 28.3034 | 28.8968 | 28.2027 | 28.1246 | 28.2225 | 27.9481 | O15372;B3KS98;A | O15372;B3KS98;A | Eukaryotic transla   | E1F3H              |          |
|     | 29.3815 | 29.713  | 29.4032 | 29.1642 | 29.7947 | 29.45   | 29.49   | 30.8434 | 29.7057 | 29.9833 | 30.6384 | 29.9813 | Q13347;Q5TFK1   | Q13347          | Eukaryotic transla   | E1F3I              |          |
|     | 24.8808 | 24.826  | 24.639  | 24.3312 | 24.7168 | 24.4929 | 25.8178 | 25.9703 | 25.8802 | 24.8032 | 25.2302 | 25.8525 | O75822;O75822-2 | O75822;O75822-2 | Eukaryotic transla   | E1F3J              |          |
|     | 26.5732 | 26.6535 | 26.4075 | 26.4058 | 26.9385 | 26.0923 | 26.4142 | 27.0683 | 26.5134 | 26.3721 | 27.1727 | 26.9621 | Q9UBQ5;K7ES31;- | Q9UBQ5;K7ES31;- | Eukaryotic transla   | E1F3K              |          |
|     | 29.3249 | 28.6612 | 29.0227 | 29.1624 | 28.8188 | 28.9952 | 29.1253 | 29.5024 | 29.1869 | 29.5346 | 29.5279 | 29.176  | Q9Y262;B0QY89;- | Q9Y262;B0QY89;- | Eukaryotic transla   | E1F3L              |          |
|     | 27.7582 | 26.9107 | 27.2252 | 27.8775 | 26.8307 | 26.8675 | 27.6259 | 26.3362 | 26.2577 | 27.3324 | 26.9897 | 26.1801 | Q7L2H7;Q7L2H7-  | Q7L2H7;Q7L2H7-  | Eukaryotic transla   | E1F3M              |          |
|     | 32.9756 | 32.4808 | 32.4101 | 32.9905 | 32.423  | 32.5649 | 32.1416 | 31.9312 | 31.8734 | 32.2929 | 32.1458 | 32.0648 | P60842;J3KT12;- | P60842;J3KT12;- | Eukaryotic initiati  | E1F4A1             |          |
|     | 26.274  | 26.3858 | 25.9152 | 26.1483 | 26.379  | 25.908  | 26.3953 | 25.471  | 25.6667 | 26.1806 | 26.0677 | 25.6673 | Q14240;Q14240-  | Q14240;Q14240-  | Eukaryotic initiati  | E1F4A2             |          |
|     | 31.1479 | 30.1847 | 30.0276 | 31.0176 | 30.1237 | 30.3149 | 28.9672 | 29.1036 | 28.9387 | 30.5119 | 30.7338 | 29.9103 | P38919;J3L3H2;- | P38919          | Eukaryotic initiati  | E1F4A3             |          |
|     | 28.3088 | 28.2976 | 28.3223 | 28.0642 | 28.4384 | 28.2207 | 28.2611 | 27.7212 | 26.852  | 28.7211 | 28.4586 | 28.1547 | P23588;E7EX17;- | P23588;E7EX17;- | Eukaryotic transla   | E1F4B              |          |
|     | 26.5948 | 25.7702 | 25.6818 | 25.8124 | 25.9102 | 25.9038 | 25.4454 | 25.8343 | 26.6655 | 26.4478 | 26.9403 | NaN     | P06730;P06730-2 | P06730;P06730-2 | Eukaryotic transla   | E1F4E              |          |
|     | 24.5922 | 24.6356 | 24.2147 | 24.0327 | 24.2087 | 24.3176 | 23.8681 | NaN     | NaN     | 24.0509 | 24.3208 | NaN     | O60573;C9JEL3;- | O60573;C9JEL3;- | Eukaryotic transla   | E1F4E2             |          |
|     | 24.9865 | 25.2568 | 24.2034 | 23.2155 | 24.9202 | 23.2331 | NaN     | NaN     | 23.3288 | 23.1644 | 22.8834 | 23.9098 | Q13541          | Q13541          | Eukaryotic transla   | E1F4EBP1           |          |
| NaN | NaN     | NaN     | NaN     | 20.1337 | NaN             | Q13542          | Q13542               | Eukaryotic transla | E1F4EBP2 |
| NaN | NaN     | NaN     | NaN     | 24.3677 | NaN     |         |                 |                 |                      |                    |          |



|     |         |         |         |         |         |         |         |         |         |         |         |         |                 |                 |                      |                    |                 |                     |             |
|-----|---------|---------|---------|---------|---------|---------|---------|---------|---------|---------|---------|---------|-----------------|-----------------|----------------------|--------------------|-----------------|---------------------|-------------|
|     | 27.2887 | 26.9484 | 27.0333 | 27.1644 | 27.1261 | 26.9256 | 27.5378 | 27.8126 | 27.6861 | 27.3603 | 27.4416 | 27.8028 | O60841;A0A087W  | O60841;A0A087W  | Eukaryotic transla   | EIF5B              |                 |                     |             |
|     | 28.276  | 28.2017 | 27.903  | 28.0036 | 27.8805 | 27.8395 | 27.198  | 26.4359 | 27.0429 | 28.1075 | 28.2189 | 27.6007 | P56537;P56537-2 | P56537;P56537-2 | Eukaryotic transla   | EIF6               |                 |                     |             |
|     | 25.139  | 23.6893 | 24.4992 | 25.1039 | 24.4395 | 24.3847 | 22.9302 | 22.7575 | 22.9528 | 26.6653 | 26.6294 | 23.8605 | Q9BQ52;G5E9D5   | Q9BQ52;G5E9D5   | Zinc phosphodiester  | ELAC2              |                 |                     |             |
|     | 27.6808 | 26.8884 | 26.4774 | 27.4377 | 26.9901 | 26.7344 | 25.9302 | 25.938  | 23.5425 | 26.0426 | 26.2364 | 26.0634 | Q15717;Q15717-1 | Q15717;Q15717-2 | ELAV-like protein    | ELAVL1             |                 |                     |             |
|     | 21.5849 | NaN     | NaN     | 22.0614 | NaN     | 21.4831 | NaN     | NaN     | NaN     | NaN     | 21.8398 | NaN     | P55199;U3KQ90   | P55199;U3KQ90   | RNA polymerase I     | ELL                |                 |                     |             |
|     | 26.9587 | 26.6859 | 27.0378 | 26.8324 | 26.8783 | 27.019  | 27.016  | 26.8301 | 26.6154 | 26.948  | 26.8788 | 26.7609 | Q96IJ3;Q5JVZ5   | Q96IJ3;Q5JVZ5   | Engulfment and c     | ELMO2              |                 |                     |             |
|     | 22.8837 | NaN     | NaN     | 22.6464 | NaN     | 23.1434 | NaN     | NaN     | NaN     | 22.7396 | NaN     | NaN     | Q8IZ81;D6R855   | Q8IZ81;D6R855   | ELMO domain-cor      | ELMOD2             |                 |                     |             |
|     | 24.6972 | NaN     | NaN     | 24.6997 | 25.0777 | 23.8329 | NaN     | 24.9789 | 24.878  | 24.9943 | NaN     | 24.6316 | NaN             | Q9BW60;Q9BW60   | Q9BW60;Q9BW60        | Elongation of very | ELOVL1          |                     |             |
| NaN |         | 22.8854 | 23.5316 | 22.991  | 24.5314 | 24.0435 | NaN     | 25.3907 | 26.1062 | 22.8431 | 23.926  | 25.2952 | Q9NYP7;A0A0A0N  | Q9NYP7;A0A0A0N  | Elongation of very   | ELOVL5             |                 |                     |             |
|     | 23.6747 | NaN     | 23.6403 | 23.903  | 23.8528 | NaN     | NaN     | NaN     | NaN     | 24.3902 | 24.3893 | NaN     | Q6IA86;Q6IA86-5 | Q6IA86;Q6IA86-5 | Elongator comple     | ELP2               |                 |                     |             |
|     | 25.0272 | 23.6811 | 24.4607 | 25.1139 | 24.2837 | 24.5167 | 23.9366 | NaN     | NaN     | 24.3448 | 24.5617 | 23.3352 | Q9HY93;Q9HY93   | Q9HY93;Q9HY93   | Elongator comple     | ELP3               |                 |                     |             |
| NaN | NaN     | NaN     | NaN     | 23.1276 | NaN     | Q96EB1;G5E9D4   | Q96EB1;G5E9D4   | Elongator comple     | ELP4               |                 |                     |             |
| NaN | NaN     | NaN     | NaN     | 21.2146 | NaN     | Q8TE02;Q8TE02-4 | Q8TE02;Q8TE02-4 | Elongator comple     | ELP5               |                 |                     |             |
|     | 24.6824 | NaN     | 23.8771 | 24.3174 | 23.0097 | 23.758  | 23.2238 | NaN     | NaN     | 23.3892 | 23.1724 | NaN     | Q0PNE2;C9IYN7   | Q0PNE2;C9IYN7   | Elongator comple     | ELP6               |                 |                     |             |
|     | 23.744  | NaN     | 23.7547 | 23.8581 | NaN     | Q6PCB8;Q6PCB8   | Q6PCB8;Q6PCB8   | Embiggin             | EMB                |                 |                     |             |
|     | 25.0207 | 24.9921 | 24.7199 | 24.8689 | 24.618  | 24.6531 | 25.1964 | 25.2869 | 25.9295 | 24.7515 | 24.5018 | 25.2084 | Q8N766;Q8N766   | Q8N766;Q8N766   | ER membrane pro      | EMC1               |                 |                     |             |
|     | 25.6422 | 26.1275 | 25.7217 | 25.6913 | 25.8029 | 25.6343 | 25.7278 | 26.2923 | 26.126  | 25.8368 | 25.7193 | 25.3332 | Q15006;H0YAS9   | Q15006          | ER membrane pro      | EMC2               |                 |                     |             |
| NaN | NaN     | NaN     | NaN     | NaN     | NaN     | NaN     | 22.4135 | NaN     | NaN     | NaN     | NaN     | NaN     | S4R329;Q5J8M3   | S4R329;Q5J8M3   | ER membrane pro      | EMC4               |                 |                     |             |
| NaN | NaN     | NaN     | 23.114  | 23.1946 | 23.5989 | 23.2956 | NaN     | 24.2748 | 24.2819 | NaN     | 23.547  | 23.7198 | Q9NPA0;H0YDT8   | Q9NPA0;H0YDT8   | ER membrane pro      | EMC7               |                 |                     |             |
|     | 23.0934 | NaN     | 23.2559 | 23.6257 | NaN     | NaN     | 23.5097 | NaN     | NaN     | 23.5384 | 23.4037 | NaN     | Q43402;M0R1B0   | Q43402;M0R1B0   | ER membrane pro      | EMC8               |                 |                     |             |
|     | 24.5841 | 24.7047 | 24.9888 | 24.3778 | 24.3693 | 25.1714 | 24.223  | 24.8216 | 24.0879 | 24.6081 | 24.0233 | 24.0984 | P50402;Q5HY57   | P50402;Q5HY57   | Emerin               | EMD                |                 |                     |             |
|     | 25.9625 | 24.005  | 24.1136 | 25.7732 | 24.2852 | 24.354  | 23.4285 | NaN     | NaN     | 25.8688 | 26.1318 | NaN     | Q92979;A0A087W  | Q92979;A0A087W  | Ribosomal RNA sn     | EMG1               |                 |                     |             |
|     | 24.0647 | 24.8177 | 24.6701 | 23.6658 | 23.8962 | 24.2414 | 23.8339 | NaN     | 25.6288 | 23.487  | 23.5387 | NaN     | Q95834-3;Q95834 | Q95834-3;Q95834 | Echinoderm micr      | EML2               |                 |                     |             |
|     | 25.6929 | 25.8487 | 25.838  | 24.6401 | 25.2069 | 25.3928 | 25.4841 | 26.3501 | 26.0542 | 24.8037 | 25.2376 | 25.5945 | Q9HC35;B5MBZ0   | Q9HC35;B5MBZ0   | Echinoderm micr      | EML4               |                 |                     |             |
|     | 24.46   | 25.2957 | 25.4418 | 24.1772 | 24.9805 | 24.8875 | 24.7372 | NaN     | 24.6948 | 24.6019 | 24.8761 | 25.3345 | Q8N857;Q8N857   | Q8N857;Q8N857   | Protein enabled h    | ENAH               |                 |                     |             |
|     | 23.2938 | 23.2248 | 23.7895 | 23.5252 | 23.5871 | 23.8454 | 23.4761 | 23.5444 | NaN     | 23.7908 | 23.4003 | 24.4733 | Q94919          | Q94919          | Endonuclease dor     | ENDOD1             |                 |                     |             |
|     | 28.6714 | 28.3625 | 29.1599 | 29.0597 | 28.5646 | 29.3199 | 29.1247 | 28.275  | 28.791  | 29.8436 | 28.9445 | 28.9607 | P17813;P17813-2 | P17813;P17813-2 | Endoglin             | ENG                |                 |                     |             |
|     | 34.1362 | 34.6952 | 34.1947 | 33.6656 | 34.2181 | 34.1488 | 34.502  | 34.139  | 33.8441 | 34.0992 | 34.0876 | 34.1654 | P06733;P06733-2 | P06733;P06733-2 | Alpha-enolase        | ENO1               |                 |                     |             |
|     | 27.9478 | 29.3659 | 28.5271 | 27.656  | 28.9902 | 28.6028 | 28.1055 | 28.7544 | 28.693  | 28.0032 | 28.4214 | 28.9805 | P09104;P09104-2 | P09104;P09104-2 | Gamma-enolase        | ENO2               |                 |                     |             |
| NaN | NaN     | NaN     | 25.3109 | NaN     | NaN     | 25.2008 | NaN     | NaN     | NaN     | NaN     | NaN     | NaN     | P13929;P13929-3 | P13929;P13929-3 | Beta-enolase         | ENO3               |                 |                     |             |
|     | 25.4801 | 26.6861 | 25.9422 | 24.9626 | 26.2604 | 25.6905 | 27.5021 | NaN     | NaN     | 25.6828 | 25.892  | NaN     | Q9UHY7;A0A0C4C  | Q9UHY7;A0A0C4C  | Enolase-phosphat     | ENOPH1             |                 |                     |             |
|     | 28.0238 | 28.7828 | 29.2163 | 28.3319 | 28.818  | 29.3588 | 29.3994 | 28.5342 | 28.8897 | 29.6023 | 28.9828 | 28.7127 | P22413;E9PE72   | P22413          | Ectonucleotide py    | ENPP1              |                 |                     |             |
|     | 24.9289 | 23.9802 | 24.5958 | 24.904  | 23.4806 | 24.4368 | 24.9401 | NaN     | NaN     | 23.6658 | 23.0343 | NaN     | Q9Y6X5;Q6UWV6   | Q9Y6X5          | Bis(5-adenosyl)-tr   | ENPP4              |                 |                     |             |
| NaN |         | 24.4133 | 24.2122 | NaN     | 24.217  | 24.1323 | NaN             | NaN             | NaN                  | Q43768;P56211      | Q43768;P56211   | H Alpha-endosulfine | ENSA;ARPP19 |
|     | 23.3332 | 23.2332 | 23.499  | 23.3884 | 22.943  | 23.3965 | NaN     | NaN     | NaN     | 22.9046 | NaN     | NaN     | Q75355;O75355-2 | O75355;O75355-2 | Ectonucleoside tri   | ENTPD3             |                 |                     |             |
|     | 24.1482 | 25.0999 | 24.8143 | 24.0893 | 25.0702 | 24.282  | 24.5384 | 24.9881 | NaN     | 24.1045 | 25.1623 | 25.0036 | Q9NPA8;Q9NPA8   | Q9NPA8;Q9NPA8   | Transcription and    | ENY2               |                 |                     |             |
| NaN | NaN     | NaN     | NaN     | 22.5157 | NaN     | NaN     | NaN     | NaN     | NaN     | 21.3659 | NaN     | NaN     | Q09472;Q92793   | Q09472          | Histone acetyltr     | EP300              |                 |                     |             |
|     | 23.7523 | 24.3448 | 24.2549 | 23.6061 | 23.3877 | 24.1612 | NaN     | NaN     | NaN     | 24.0393 | 23.4548 | NaN     | P11171;P11171-2 | P11171;P11171-2 | Protein 4.1          | EPB41              |                 |                     |             |
|     | 24.5694 | 24.7635 | 25.446  | 24.5524 | 24.4904 | 25.3679 | 25.0169 | NaN     | NaN     | 25.5402 | 25.407  | 25.1907 | Q9H4G0-2;Q9H4C  | Q9H4G0-2;Q9H4C  | Band 4.1-like prot   | EPB41L1            |                 |                     |             |
|     | 23.9088 | 24.7005 | 25.4903 | 24.7195 | 24.9669 | 25.573  | 25.2796 | 24.998  | 24.5756 | 26.3418 | 26.2249 | 26.026  | E9PHY5;O43491-4 | E9PHY5;O43491-4 | Band 4.1-like prot   | EPB41L2            |                 |                     |             |
| NaN | NaN     | NaN     | NaN     | 20.6144 | NaN             | NaN             | NaN                  | H0Y5B0;E9PMG5      | H0Y5B0          |                     | EPB41L2     |
|     | 29.1414 | 29.7371 | 30.2718 | 29.71   | 30.1624 | 30.6517 | 29.4741 | 28.8714 | 29.2984 | 30.5633 | 30.2527 | 30.491  | O43491;Q6R5J7   | O43491          | Band 4.1-like prot   | EPB41L2            |                 |                     |             |
| NaN | NaN     | NaN     | NaN     | 22.9043 | NaN             | NaN             | NaN                  | Q9Y2J2;J3Q555      | J3Q555          | Band 4.1-like prot  | EPB41L3     |
|     | 29.4917 | 29.0572 | 28.9073 | 29.348  | 28.9136 | 28.9451 | 27.3914 | 26.8001 | 27.1096 | 27.0454 | 27.6856 | 27.9556 | Q9Y2J2-2;A8K968 | Q9Y2J2-2;A8K968 | Band 4.1-like prot   | EPB41L3            |                 |                     |             |
| NaN | NaN     | NaN     | 22.3409 | 21.8036 | NaN     | 22.0874 | NaN     | NaN     | NaN     | 22.2407 | NaN     | NaN     | Q9H329;Q9H329   | Q9H329;Q9H329   | Band 4.1-like prot   | EPB41L4B           |                 |                     |             |
|     | 23.8502 | 24.2864 | 25.1068 | 24.3275 | 24.4056 | 25.2417 | 24.5317 | NaN     | 23.7689 | 24.5124 | 24.2119 | 25.0198 | Q9HCM4;Q9HCM    | Q9HCM4;Q9HCM    | Band 4.1-like prot   | EPB41L5            |                 |                     |             |
|     | 25.1302 | 24.4569 | 25.1227 | 24.8242 | 24.3723 | 25.3065 | NaN     | NaN     | 24.836  | NaN     | NaN     | 25.1536 | P16422;B5MCA4   | P16422;B5MCA4   | Epithelial cell adhi | EPCAM              |                 |                     |             |
| NaN | NaN     | NaN     | NaN     | 21.6702 | NaN             | NaN             | NaN                  | Q9UM22-2;Q9UUM     | Q9UM22-2;Q9UUM  | Mammalian epen      | EPDR1       |
|     | 26.3915 | 24.7149 | 25.3939 | 25.595  | 24.3529 | 24.7066 | 24.7891 | 24.5355 | NaN     | 24.5433 | 23.4339 | NaN     | Q9HCE0;Q9HCE0   | Q9HCE0;Q9HCE0   | Ectopic P granules   | EPG5               |                 |                     |             |
|     | 31.9246 | 31.6346 | 32.3364 | 32.0313 | 31.5217 | 32.5008 | 31.2577 | 30.2919 | 30.8863 | 31.7526 | 31.4815 | 31.1991 | P29317;P29317-2 | P29317          | Ephrin type-A rec    | EPHA2              |                 |                     |             |
| NaN | NaN     | NaN     | NaN     | NaN     | NaN     | NaN     | NaN     | NaN     | NaN     | NaN     | NaN     | 21.8991 | P54756;F8W9W0   | P54756;F8W9W0   | Ephrin type-A rec    | EPHA5;EPHA3        |                 |                     |             |
|     | 26.0524 | 26.4607 | 27.0666 | 26.342  | 26.338  | 27.1745 | 26.4433 | 25.0334 | 25.5492 | 27.4219 | 26.3466 | 25.9377 | P29323;P29323-2 | P29323;P29323-2 | Ephrin type-B rec    | EPHB2              |                 |                     |             |
|     | 22.3024 | NaN     | 23.4343 | 23.1331 | NaN     | NaN     | NaN     | NaN     | NaN     | 22.6447 | NaN     | NaN     | NaN             | NaN             | NaN                  | P54753             | P54753          | Ephrin type-B rec   | EPHB3       |
|     | 25.0376 | 24.896  | 25.8466 | 25.3187 | 25.1612 | 26.0663 | 25.3989 | NaN     | 25.0319 | 26.45   | 25.9283 | 25.668  | P54760;Q96L35   | P54760;Q96L35   | Ephrin type-B rec    | EPHB4              |                 |                     |             |
|     | 23.3893 | 23.6893 | 23.6711 | 23.6852 | 23.5783 | NaN     | 24.3837 | NaN     | 24.7396 | 24.4765 | 24.0859 | 23.5629 | P07099;B1AQPF   | P07099          | Epoxide hydrolase    | EPHX1              |                 |                     |             |
| NaN | NaN     | NaN     | NaN     | 22.3854 | NaN             | NaN             | NaN                  | Q8IU55             | Q8IU55          | Epoxide hydrolase   | EPHX4       |
|     | 24.3549 | 23.61   | 23.9819 | 24.0187 | 23.4233 | 23.5561 | 24.1185 | 24.8648 | 24.237  | 25.045  | 25.3502 | 24.8439 | Q7L775;A0A096L  | Q7L775          | EPM2A-interactin     | EPM2AIP1           |                 |                     |             |
|     | 23.3494 | 23.4964 | 23.3461 | 22.9527 | 23.1336 | 23.2901 | 23.7191 | NaN     | 23.973  | NaN     | 23.8713 | NaN     | NaN             | NaN             | NaN                  | Q9Y6I3;Q9Y6I3-3    | Q9Y6I3;Q9Y6I3-3 | Epsin-1             | EPN1        |
|     | 22.5721 | 23.4473 | 23.1753 | 22.9591 | 23.2232 | 23.3473 | NaN             | NaN             | NaN                  | O95208-2;F6PQP     | O95208-2;F6PQP  | Epsin-2             | EPN2        |
|     | 30.5477 | 30.0799 | 30.0812 | 30.3923 | 30.2503 | 30.0475 | 29.8863 | 30.2908 | 29.7998 | 30.236  | 30.1649 | 29.8368 | P07814;V9GYZ6   | P07814;V9GYZ6   | Bifunctional gluta   | EPRS               |                 |                     |             |



|         |         |         |         |         |         |         |         |         |                      |         |         |                                                           |                                                         |
|---------|---------|---------|---------|---------|---------|---------|---------|---------|----------------------|---------|---------|-----------------------------------------------------------|---------------------------------------------------------|
| 23.0229 | 23.1684 | 23.0678 | NaN     |         | 22.8998 | NaN     | NaN     | NaN     | NaN                  | NaN     | NaN     | NaN                                                       | P42566;B1AUU8;F P42566;B1AUU8;F Epidermal growth EPS15  |
| 25.1268 | 25.6206 | 25.6723 | 25.1699 | 25.6657 | 25.1987 | 25.4449 | 25.5017 | 25.4062 | 25.2034              | 25.1054 | 25.7799 | Q9UBC2;Q9UBC2- Q9UBC2;Q9UBC2- Epidermal growth EPS15L1    |                                                         |
| 23.614  | 23.7866 | 24.1413 | 23.4674 | 23.6455 | 23.8083 | NaN     | NaN     | NaN     | NaN                  | NaN     | NaN     | Q12929;Q12929-; Q12929;Q12929-2 Epidermal growth EPS8     |                                                         |
| 26.5996 | 26.4035 | 26.9268 | 26.3896 | 26.3964 | 26.3748 | 26.0877 | 23.3151 | NaN     | 25.9413              | 25.5288 | 24.2905 | Q9H653;Q9H653- Q9H653;Q9H653- Epidermal growth EPS8L2     |                                                         |
| 23.2043 | NaN     |         | 23.1828 | 23.4434 | NaN     | NaN     | NaN     | NaN     | 23.0645              | 22.7107 | NaN     | Q9C0D9;A0A087V Q9C0D9;A0A087V Ethanolaminepho EPT1        |                                                         |
| NaN     | NaN     | NaN     |         | 21.8597 | NaN     | NaN     | NaN     | NaN     | NaN                  | NaN     | NaN     | O75616;K7EQJ8;J O75616;K7EQJ8- GTPase Era, mitoc ERA1     |                                                         |
| 25.405  | 26.1678 | 25.9855 | 25.2608 | 25.9404 | 25.8984 | 27.1002 | 26.6874 | 26.0468 | 25.2565              | 25.1294 | 24.4996 | Q9NZ08;Q9NZ08- Q9NZ08;Q9NZ08- Endoplasmic retic ERAP1     |                                                         |
| 25.439  | 25.5424 | 25.9337 | 25.4938 | 25.3274 | 26.0727 | NaN     | NaN     | NaN     | 25.7154              | 25.5411 | 25.1821 | P04626;B4DTR1;J P04626;B4DTR1;J Receptor tyrosine ERBB2   |                                                         |
| 27.87   | 28.0888 | 28.2516 | 27.7327 | 27.9142 | 28.1354 | 28.2163 | 27.8747 | 27.9189 | 28.4834              | 28.1886 | 28.1937 | Q96RT1;Q96RT1- Q96RT1;Q96RT1- Protein LAP2 ERBB2IP        |                                                         |
| 23.8292 | 24.2614 | 23.9612 | 23.5851 | 23.9985 | 23.5624 | 23.6078 | 24.3441 | NaN     | 23.2604              | 23.4367 | 24.197  | Q8IUD2;G8JLD3;X Q8IUD2;G8JLD3;X ELKS/Rab6-interac ERC1    |                                                         |
| 22.0534 | NaN     | NaN     |         | 22.462  | NaN     | 22.1015 | NaN     | NaN     | NaN                  | NaN     | NaN     | P18074;E7EVE9;A P18074;E7EVE9;A TFIH basal transc ERCC2   |                                                         |
| 24.1041 | NaN     |         | 23.6525 | 24.5    | 24.3719 | 23.9047 | NaN     | NaN     | P19447;H7C309 P19447 | 23.6434 | 23.6057 | 24.4362                                                   | TFIH basal transc ERCC3                                 |
| 25.2485 | 23.7299 | 24.9082 | 25.0611 | 23.7947 | 24.351  | 24.1279 | 24.0346 | NaN     | 24.2371              | 24.2888 | NaN     | Q2NKG8;B5MDQC Q2NKG8;B5MDQC DNA excision repa ERCC6L      |                                                         |
| NaN     | NaN     | NaN     | NaN     | NaN     | NaN     | 24.2009 | NaN     | NaN     | NaN                  | NaN     | NaN     | O14944 O14944 Proepiregulin;Epir EREG                     |                                                         |
| 26.0356 | 25.0017 | 25.2121 | 25.6582 | 25.2488 | 25.1532 | 24.668  | 24.5308 | 25.4126 | 24.9384              | 24.4181 | 24.5835 | Q969X5;Q969X5-; Q969X5;Q969X5-2 Endoplasmic retic ERGIC1  |                                                         |
| 24.3964 | 23.9313 | 23.4197 | 24.0788 | 23.6093 | NaN     | NaN     | NaN     | NaN     | 23.2867              | NaN     | NaN     | Q96RQ1;A0A087V Q96RQ1;A0A087V Endoplasmic retic ERGIC2    |                                                         |
| 25.3011 | 24.5588 | 24.7062 | 25.0592 | 24.2727 | 24.2477 | 24.4626 | NaN     | 24.1733 | 24.1604              | 23.7043 | NaN     | Q9Y282;HOY5K5;C Q9Y282;HOY5K5;C Endoplasmic retic ERGIC3  |                                                         |
| 28.0376 | 28.4931 | 27.9866 | 27.7496 | 28.0403 | 28.1204 | 27.7681 | 28.445  | 27.6111 | 28.4069              | 28.5621 | 28.2837 | P84090;G3V279 P84090;G3V279 Enhancer of rudin ERH         |                                                         |
| 23.2595 | 22.4322 | 23.0585 | 22.7677 | 22.5187 | 23.0477 | 22.0488 | NaN     | NaN     | NaN                  | NaN     | NaN     | Q8IV48 Q8IV48 3-5 exoribonuclea ERI1                      |                                                         |
| 22.1444 | NaN     | NaN     |         | 22.2445 | NaN     | 22.4757 | NaN     | NaN     | NaN                  | NaN     | NaN     | Q96DZ1;Q96DZ1- Q96DZ1;Q96DZ1- Endoplasmic retic ERLEC1    |                                                         |
| 27.6017 | 27.7798 | 27.5099 | 27.3763 | 27.5523 | 27.7015 | 27.3892 | 27.381  | 27.5645 | 27.6676              | 27.2589 | 27.4537 | O75477;B0QZ43 O75477;B0QZ43 Erlin-1 ERLIN1                |                                                         |
| 25.3046 | 26.7881 | 26.0349 | 25.4883 | 26.6492 | 26.1042 | 25.6942 | 26.4445 | 26.6224 | 25.2271              | 25.6571 | 25.9532 | O94905;E5RHW4; O94905;E5RHW4; Erlin-2 ERLIN2              |                                                         |
| 28.9866 | 29.0974 | 28.9467 | 28.889  | 28.9306 | 28.9346 | 28.9212 | 28.93   | 29.3011 | 28.8346              | 28.6186 | 28.529  | Q96HE7;G3V3E6;f Q96HE7 ERO1-like protein ERO1L            |                                                         |
| 28.71   | 29.629  | 28.8225 | 28.6993 | 29.4008 | 28.7379 | 29.3937 | 30.0517 | 29.6515 | 29.1335              | 29.2056 | 29.0852 | P30040;F8VY02;F P30040;F8VY02 Endoplasmic retic ERP29     |                                                         |
| 25.7672 | 26.7376 | 25.9858 | 25.797  | 26.3125 | 26.1069 | 26.275  | 27.0021 | 27.1525 | 25.7679              | 26.0363 | 26.3224 | Q9BS26 Q9BS26 Endoplasmic retic ERP44                     |                                                         |
| 28.9652 | 29.603  | 29.4826 | 29.323  | 29.5215 | 29.6482 | 29.2088 | 28.976  | 29.0965 | 30.1891              | 29.6481 | 29.8511 | Q96AP7;F8WDW5 Q96AP7;F8WDW5 Endothelial cell-se ESAM      |                                                         |
| 27.0363 | 27.6775 | 27.1999 | 26.768  | 27.6209 | 27.2013 | 27.166  | 27.3917 | 27.7732 | 27.3878              | 27.6811 | 28.1207 | P10768;H7BZT7;X P10768;H7BZT7;X S-formylglutathioi ESD    |                                                         |
| 21.7569 | NaN     | 22.227               | 22.6285 | NaN     | Q14674;Q14674-; Q14674;Q14674-2 Separin ESPL1             |                                                         |
| 28.3089 | 28.6285 | 28.5652 | 28.2745 | 28.4962 | 28.5284 | 28.8023 | 28.7626 | 28.8131 | 28.4987              | 28.3846 | 28.4309 | Q9BSJ8;Q9BSJ8-2; Q9BSJ8;Q9BSJ8-2 Extended synapto ESYT1   |                                                         |
| 27.3926 | 27.2266 | 27.6881 | 27.3543 | 27.4651 | 27.8065 | 27.7424 | 27.8261 | 27.9199 | 27.857               | 27.5079 | 27.626  | A0FGR8-2;H7BXI1 A0FGR8-2;H7BXI1 Extended synapto ESYT2    |                                                         |
| 26.6094 | 26.3424 | 26.2822 | 26.1942 | 26.5669 | 26.445  | 26.504  | 26.3355 | 25.9452 | 26.5727              | 26.6903 | 26.399  | P62495;B7Z7P8;P P62495;B7Z7P8;P Eukaryotic peptid ETF1    |                                                         |
| 27.1496 | 26.5845 | 26.1207 | 26.9394 | 26.4916 | 26.2058 | 25.2773 | 24.5543 | 25.3717 | 26.1432              | 26.1882 | 25.478  | P13804;P13804-2 P13804;P13804-2 Electron transfer f ETFA  |                                                         |
| 26.6544 | 26.81   | 26.3392 | 26.3861 | 26.826  | 26.539  | 25.2886 | NaN     | 25.5446 | 25.661               | 26.1915 | 25.5899 | P38117;MOQY67 P38117;MOQY67 Electron transfer f ETFB      |                                                         |
| 23.6424 | NaN     |         | 22.7835 | 23.0966 | NaN     | NaN     | NaN     | NaN     | 23.1402              | 23.8382 | NaN     | O95571;MOQXB5; O95571;MOQXB5; Persulfide dioxge ETHE1     |                                                         |
| NaN     | NaN     | NaN     |         | 21.4213 | NaN     | NaN     | NaN     | NaN     | NaN                  | NaN     | NaN     | Q9HBU6;HOYH69 Q9HBU6;HOYH69 Ethanolamine kin: ETNK1       |                                                         |
| 23.2078 | NaN     |         | 23.6262 | 23.731  | 23.5074 | 24.2577 | NaN     | NaN     | NaN                  | 24.1645 | 24.4007 | 24.9506                                                   | Q9H8M9;B8ZZF5;f Q9H8M9;B8ZZF5;f Protein eva-1 hom EVA1A |
| 24.4885 | 24.4764 | 24.8103 | 24.2315 | 24.5039 | 24.7572 | 24.2654 | NaN     | 25.2003 | 24.2317              | 24.4984 | 25.3009 | P22794;J3QQH9;J P22794;J3QQH9;J Protein EVI2A EVI2A       |                                                         |
| 25.2239 | 24.9083 | 25.1483 | 25.0981 | 25.1584 | 25.5772 | 24.8914 | 24.4076 | 24.8352 | 25.3152              | 25.0226 | 25.265  | P34910;P34910-2 P34910;P34910-2 Protein EVI2B EVI2B       |                                                         |
| 24.1029 | 23.822  | 24.0705 | 23.9093 | NaN     | 23.3092 | NaN     | NaN     | NaN     | NaN                  | NaN     | NaN     | O60447;O60447-2 O60447;O60447-2 Ecotropic viral intr EVI5 |                                                         |
| 26.5593 | 25.7551 | 25.5879 | 26.1645 | 25.4349 | 25.6773 | 24.7333 | 25.3907 | 24.9811 | 26.0119              | 25.125  | 25.8114 | Q01844;B0QYK0;C Q01844;B0QYK0;C RNA-binding protx EWSR1   |                                                         |
| 27.5895 | 27.0177 | 27.1301 | 27.4464 | 26.8248 | 27.0921 | 26.7117 | 25.9317 | 25.6313 | 27.1641              | 26.4898 | 26.3163 | Q9NV70;Q9NV70- Q9NV70;Q9NV70- Exocyst complex c EXOC1     |                                                         |
| 27.5715 | 27.1209 | 27.2566 | 27.0232 | 27.0184 | 27.3409 | 26.9796 | 27.121  | 28.7046 | 27.4304              | 26.9569 | 26.7507 | Q96KP1;Q2MDF5 Q96KP1 Exocyst complex c EXOC2              |                                                         |
| 26.8616 | 27.0683 | 26.7423 | 26.768  | 27.2961 | 26.6652 | 25.9844 | 25.0176 | 25.7236 | 26.9903              | 26.3746 | 25.9148 | O60645-3;O60645 O60645-3;O60645 Exocyst complex c EXOC3   |                                                         |
| 27.2463 | 26.9535 | 27.4164 | 27.3454 | 27.0233 | 27.597  | 26.4939 | 26.8574 | 26.6823 | 27.3681              | 27.1903 | 26.9478 | Q96A65;Q96A65- Q96A65 Exocyst complex c EXOC4             |                                                         |
| 26.5121 | 26.3465 | 26.558  | 26.4124 | 26.2313 | 26.5751 | 26.1993 | 25.6881 | 26.0606 | 26.4273              | 26.19   | 26.1977 | O00471;A0A0A0N O00471;A0A0A0N Exocyst complex c EXOC5     |                                                         |
| 24.6923 | 24.208  | 24.4524 | 24.4546 | 24.2315 | 24.8558 | 24.0649 | NaN     | NaN     | 24.5917              | 24.5969 | 23.7495 | Q8TAG9;E7EW84; Q8TAG9;E7EW84; Exocyst complex c EXOC6     |                                                         |
| 25.8199 | 25.6072 | 26.0586 | 25.365  | 25.3552 | 25.5097 | 25.4591 | 25.5216 | 25.164  | 25.6101              | 25.501  | 24.5708 | Q9Y2D4;A0A0U1F Q9Y2D4;A0A0U1F Exocyst complex c EXOC6B    |                                                         |
| 27.5122 | 28.0408 | 27.8371 | 27.3896 | 27.7988 | 27.7988 | 27.1965 | 27.4175 | 27.1573 | 27.3302              | 27.3072 | 27.2603 | Q9UPT5;A0A0A0N Q9UPT5;A0A0A0N Exocyst complex c EXOC7     |                                                         |
| 27.0799 | 27.3352 | 27.3618 | 27.0059 | 27.2837 | 27.447  | 26.7747 | 27.1581 | 26.6948 | 27.3468              | 27.0581 | 26.9438 | Q8IYI6 Q8IYI6 Exocyst complex c EXOC8                     |                                                         |
| 25.2927 | 24.4298 | 24.1516 | 25.1827 | 24.4283 | 24.3829 | 23.3998 | NaN     | 23.4668 | 24.9943              | 25.2922 | 24.3173 | Q9Y3B2;B1AMU3; Q9Y3B2;B1AMU3; Exosome complex EXOSC1      |                                                         |
| 27.0153 | 25.9202 | 26.3204 | 27.1579 | 26.2647 | 26.4727 | NaN     | NaN     | NaN     | 26.3637              | 26.8045 | 24.6601 | Q01780;Q01780-; Q01780;Q01780-2 Exosome compon EXOSC10    |                                                         |
| 25.0444 | 24.8542 | 24.248  | 24.9322 | 25.2595 | 24.6988 | 23.7692 | NaN     | NaN     | 24.961               | 25.4306 | 25.3335 | Q13868;Q13868-; Q13868;Q13868-3 Exosome complex EXOSC2    |                                                         |
| 24.345  | 23.9199 | 23.9604 | 24.8482 | 24.3357 | 24.2018 | NaN     | NaN     | NaN     | 24.3806              | 24.9292 | 24.8837 | Q9NQ175;Q9NQ175 Q9NQ175;Q9NQ175 Exosome complex EXOSC3    |                                                         |
| 26.0735 | 25.8538 | 25.2747 | 25.9755 | 25.9495 | 25.5608 | 25.1206 | 25.8458 | 24.5267 | 26.1815              | 26.2525 | 25.5076 | Q9NPD3;E9PPI9;E Q9NPD3;E9PPI9;E Exosome complex EXOSC4    |                                                         |
| 23.8346 | 23.226  | 23.1075 | 24.2099 | 23.8732 | NaN     | 22.9032 | NaN     | NaN     | 23.7454              | 24.4531 | 24.0081 | Q9NQ174;M0R050 Q9NQ174;M0R050 Exosome complex EXOSC5      |                                                         |
| 26.2265 | 26.1857 | 25.6425 | 26.0471 | 26.4135 | 25.75   | 25.02   | 25.2064 | 25.3177 | 26.3844              | 26.9308 | 26.366  | Q5RKV6 Q5RKV6 Exosome complex EXOSC6                      |                                                         |
| 22.8616 | 23.2212 | 23.1039 | 23.3941 | 22.7349 | 23.0303 | NaN     | 23.377  | 22.1929 | 23.7221              | 23.9645 | 22.8153 | Q15024 Q15024 Exosome complex EXOSC7                      |                                                         |
| 23.4616 | 23.1287 | 23.2744 | 23.5018 | 23.5635 | 23.5374 | NaN     | NaN     | NaN     | 23.4107              | 24.2758 | 23.7832 | Q96B26;H7C581 Q96B26 Exosome complex EXOSC8               |                                                         |
| 24.184  | 23.0367 | 23.5157 | 23.8992 | 23.3286 | 23.5932 | NaN     | NaN     | NaN     | NaN                  | 23.9874 | NaN     | Q06265;Q06265-; Q06265;Q06265-2 Exosome complex EXOSC9    |                                                         |
| 22.4381 | NaN     |         | 22.8182 | 23.1773 | 22.6212 | NaN     | 26.1959 | 23.9912 | 23.4196              | 22.6994 | NaN     | NaN                                                       | Q16394;H7C1H6 Q16394 Exostosin-1 EXT1                   |



|         |         |         |         |         |         |         |         |         |         |         |         |                      |                  |                     |                 |         |
|---------|---------|---------|---------|---------|---------|---------|---------|---------|---------|---------|---------|----------------------|------------------|---------------------|-----------------|---------|
| 23.6127 | 23.6616 | 23.9232 | 23.6491 | 23.1138 | 23.1946 | 25.7242 | 25.9121 | 23.2333 | 23.5171 | 23.3581 | NaN     | Q93063;Q93063-7      | Q93063;Q93063-2  | Exostosin-2         | EXT2            |         |
| 22.9788 | 23.8859 | 22.9423 | 22.8242 | NaN     | 23.137  | 24.1297 | NaN     | NaN     | 22.8913 | 23.5627 | 23.8623 | Q9UBQ6;C9JEG3;f      | Q9UBQ6           | Exostosin-like 2;Pi | EXTL2           |         |
| 23.4527 | NaN     | NaN     | 23.3903 | NaN     | Q15910;Q15910-7      | Q15910;Q15910-2  | Histone-lysine N-r  | EZH2            |         |
| 32.2953 | 33.2379 | 33.7297 | 32.9151 | 33.6124 | 34.1143 | 32.5009 | 31.9624 | 31.8658 | 34.0472 | 33.736  | 32.7171 | P15311;E7EQR4        | P15311;E7EQR4    | Ezrin               | EZR             |         |
| 24.1355 | 25.1668 | 23.549  | 24.4212 | 25.1536 | 23.5698 | 24.1839 | NaN     | 26.1751 | NaN     | NaN     | NaN     | P00742;F8VBM7;P00742 | P00742           | Coagulation facto   | F10             |         |
| 26.3867 | 26.5507 | 27.1954 | 26.51   | 26.7581 | 27.2134 | 26.1214 | 25.5515 | 26.1512 | 25.9862 | 25.4294 | NaN     | Q9Y624;A0A087W       | Q9Y624;A0A087W   | Junctional adhesi   | F11R            |         |
| NaN     | NaN     | NaN     | NaN     | 20.8484 | NaN     | P00488               | P00488           | Coagulation facto   | F13A1           |         |
| 24.2045 | 24.2351 | NaN     | 23.8169 | 23.0417 | NaN     | P25116               | P25116           | Proteinase-activa   | F2R             |         |
| 23.1807 | 23.2771 | 23.4077 | 22.7723 | 23.3756 | 23.5262 | NaN     | NaN     | NaN     | NaN     | NaN     | NaN     | P55085;D6RJH3        | P55085           | Proteinase-activa   | F2RL1           |         |
| 29.0963 | 28.481  | 29.0891 | 29.2939 | 28.4522 | 28.9263 | 28.2996 | 27.4949 | 27.8767 | 28.7771 | 27.84   | 27.6059 | P13726;P13726-2      | P13726           | Tissue factor       | F3              |         |
| NaN     | 26.4371 | 26.4611 | NaN     | P15090               | P15090           | Fatty acid-binding  | FABP4           |         |
| 26.5597 | 27.2308 | 26.9458 | 26.6435 | 26.8165 | 26.7477 | 28.228  | 27.3974 | 27.6051 | 27.4117 | 27.4731 | 27.5405 | Q01469;f6L8B7;A      | Q01469           | Fatty acid-binding  | FABP5           |         |
| 23.8579 | 23.2511 | 23.5117 | 23.4759 | 22.9307 | 23.5051 | 25.0172 | 23.9249 | 23.9512 | 24.3764 | 23.6356 | 23.0761 | Q95864;Q95864-3      | Q95864;Q95864-3  | Fatty acid desatur  | FADS2           |         |
| 23.9137 | NaN     | 23.6464 | NaN     | Q9UNN5;Q9UNN5        | Q9UNN5;Q9UNN5    | FAS-associated fa   | FAF1            |         |
| 25.985  | 25.8185 | 25.3259 | 25.5411 | 25.2848 | 25.5301 | 25.4548 | NaN     | 25.7995 | 25.239  | 25.0143 | NaN     | Q96CS3               | Q96CS3           | FAS-associated fa   | FAF2            |         |
| 25.8485 | 27.4894 | 27.0767 | 25.5117 | 27.2219 | 26.5929 | 26.1462 | NaN     | 23.4214 | 25.4629 | 24.4466 | 25.7469 | P16930;P16930-2      | P16930;P16930-2  | Fumarylacetoacet    | FAH             |         |
| NaN     | NaN     | NaN     | NaN     | 21.3948 | NaN     | Q6P587;Q6P587-7      | Q6P587;Q6P587-7  | Acylpyruvase FAH    | FAHD1           |         |
| 24.154  | 22.7998 | 22.9814 | 23.8085 | 22.9974 | 22.722  | 23.3831 | 23.5841 | 23.5221 | 23.6642 | NaN     | NaN     | Q96GK7;C9JGM0        | Q96GK7;C9JGM0    | Fumarylacetoacet    | FAHD2A          |         |
| 21.7443 | NaN     | Q9BTL3               | Q9BTL3           | RNMT-activating r   | FAM103A1        |         |
| NaN     | 24.7642 | 24.8027 | NaN     | 24.7191 | 24.6021 | NaN     | NaN     | NaN     | NaN     | NaN     | NaN     | Q9H098;Q9H098        | Q9H098;Q9H098    | Protein FAM107B     | FAM107B         |         |
| 24.077  | NaN     | 24.061  | 24.3274 | 24.0027 | 24.0121 | NaN     | NaN     | NaN     | NaN     | NaN     | 24.415  | NaN                  | Q96P22;E9PR18;E  | Q96P22;E9PR18       | Protein FAM111A | FAM111A |
| 22.7852 | 22.3272 | 22.1275 | 22.8851 | NaN     | NaN     | NaN     | 23.5384 | NaN     | 22.0598 | NaN     | NaN     | Q6SJ93;Q6SJ93-2      | Q6SJ93;Q6SJ93-2  | Protein FAM111B     | FAM111B         |         |
| 24.7285 | 25.2122 | 24.582  | 24.626  | 24.6442 | 24.7063 | 24.4307 | 24.4731 | 24.8318 | 24.3558 | 23.8735 | 24.8246 | Q8IWE2               | Q8IWE2           | Protein NOXP20      | FAM114A1        |         |
| 23.168  | 23.0961 | 22.8589 | 22.9787 | 22.886  | 22.9572 | NaN     | NaN     | NaN     | 22.4554 | NaN     | NaN     | Q9NRY5;f6L9D5;E      | Q9NRY5;f6L9D5;E  | Protein FAM114A     | FAM114A2        |         |
| 27.8915 | 26.9271 | 27.2706 | 27.7411 | 27.3279 | 27.2514 | 26.4051 | 27.273  | 26.4946 | 26.9704 | 26.9738 | 26.6919 | Q9NZB2;Q9NZB2-       | Q9NZB2;Q9NZB2-   | Constitutive coact  | FAM120A         |         |
| 21.9819 | NaN     | NaN     | 21.9563 | NaN     | 21.8657 | NaN     | NaN     | NaN     | 21.8403 | 22.1307 | NaN     | Q96EK7;A0A0D9S       | Q96EK7;A0A0D9S   | Constitutive coact  | FAM120B         |         |
| 24.9291 | 25.0125 | 25.8435 | 25.2462 | 24.9297 | 25.957  | 24.9871 | NaN     | 24.8384 | 25.9315 | 25.4515 | 24.8943 | Q9BYI3-3;H7COW       | Q9BYI3-3;H7COW   | Hyccin              | FAM126A         |         |
| 21.7668 | 21.4956 | 21.8587 | 21.8346 | 21.7658 | 21.4924 | NaN     | NaN     | NaN     | NaN     | NaN     | NaN     | A6ZKI3;Q17R80;Q      | A6ZKI3           | Protein FAM127A     | FAM127A         |         |
| 28.6538 | 28.673  | 28.7829 | 27.9535 | 28.4684 | 28.5712 | 28.7541 | 28.0112 | 28.4537 | 27.9402 | 27.9014 | 28.1365 | Q9BZQ8;H0Y7M9        | Q9BZQ8           | Protein Niban       | FAM129A         |         |
| 28.9647 | 29.5141 | 30.0368 | 29.0586 | 29.6212 | 30.2077 | 29.5571 | 28.6021 | 29.0819 | 29.9646 | 29.7576 | 29.8528 | Q96TA1;Q96TA1-       | Q96TA1;Q96TA1-   | Niban-like protein  | FAM129B         |         |
| NaN     | NaN     | 22.9646 | 22.8704 | NaN     | NaN     | 23.6533 | NaN     | 23.5094 | NaN     | NaN     | NaN     | Q86VR2;K7ENZ6;f      | Q86VR2;K7ENZ6;f  | Protein FAM134C     | FAM134C         |         |
| 25.0816 | 25.6492 | 25.1337 | 25.141  | 25.7923 | 25.2186 | 25.0508 | 26.0577 | 25.866  | 24.6903 | 25.3477 | 25.6576 | Q96C01;C9J2Y4;E      | Q96C01;C9J2Y4;E  | Protein FAM136A     | FAM136A         |         |
| 24.1333 | 23.4747 | 23.7278 | 24.0198 | 23.4059 | 23.2691 | 23.439  | NaN     | NaN     | 23.5377 | 23.3077 | NaN     | Q5W0V3;Q5W0V         | Q5W0V3;Q5W0V     | Protein FAM160B     | FAM160B1        |         |
| 25.4763 | 25.3825 | 26.0493 | 25.0723 | 25.3208 | 26.1222 | 25.8906 | 25.0484 | 25.3802 | 26.3199 | 25.8388 | 25.9922 | Q5VUB5               | Q5VUB5           | Protein FAM171A     | FAM171A1        |         |
| NaN     | NaN     | 25.2732 | NaN     | A8MVVW0;K7EMG        | A8MVVW0          | Protein FAM171A     | FAM171A2        |         |
| NaN     | NaN     | 22.4525 | NaN     | Q6P995               | Q6P995           | Protein FAM171B     | FAM171B         |         |
| 26.0987 | 25.6293 | 25.6583 | 25.7573 | 25.9436 | 25.86   | 25.5586 | 25.8509 | 25.841  | 25.8005 | 25.7508 | 25.4168 | Q15018               | Q15018           | BRISC complex su    | FAM175B         |         |
| 23.3748 | 23.0645 | 23.1405 | 23.1668 | 23.2069 | 23.3588 | NaN     | NaN     | NaN     | NaN     | NaN     | NaN     | f3L317;C9JLW8;f3     | f3L317;C9JLW8;f3 | Protein FAM195B     | FAM195B         |         |
| NaN     | NaN     | NaN     | NaN     | NaN     | NaN     | 23.9119 | NaN     | NaN     | NaN     | NaN     | NaN     | Q9UK61;Q9UK61-       | Q9UK61;Q9UK61-   | Protein FAM208A     | FAM208A         |         |
| 25.0459 | 24.5265 | 25.0844 | 25.1379 | 24.5861 | 24.7613 | 25.2185 | NaN     | NaN     | 24.7312 | 24.4986 | NaN     | Q9BRX8;Q9BRX8-       | Q9BRX8;Q9BRX8-   | Redox-regulatory    | FAM213A         |         |
| 24.0164 | 24.3155 | 24.2517 | 24.1762 | 24.1017 | 23.6893 | 24.6996 | 23.9143 | NaN     | 24.0692 | 22.9585 | NaN     | Q641Q2;F8W7U3        | Q641Q2;F8W7U3    | WASH complex su     | FAM21A;FAM21C   |         |
| 25.6402 | 26.4334 | 25.6683 | 25.5093 | 25.9407 | 25.7198 | 27.6679 | 27.0562 | 27.0427 | 25.6822 | 25.1112 | 26.1408 | Q92520;C9JP35;C      | Q92520           | Protein FAM3C       | FAM3C           |         |
| 24.1059 | 24.2058 | 24.1632 | NaN     | 24.0453 | 24.0304 | 24.2116 | 23.3324 | 25.0304 | NaN     | 23.2745 | 24.9044 | Q8TCE6;Q8TCE6-       | Q8TCE6;Q8TCE6-2  | Protein FAM45A;f    | FAM45A;FAM45B   |         |
| NaN     | 22.0013 | NaN     | NaN     | Q9H0Q0               | Q9H0Q0           | Protein FAM49A      | FAM49A          |         |
| 27.9266 | 27.9243 | 28.0304 | 27.4771 | 27.7161 | 28.0611 | 28.3112 | 26.9896 | 27.7864 | 28.5391 | 27.8581 | 28.0423 | Q9NUQ9;Q9NUQ         | Q9NUQ9;Q9NUQ     | Protein FAM49B      | FAM49B          |         |
| 25.2401 | 25.6343 | 25.6124 | 24.9152 | 25.4046 | 25.9552 | NaN     | NaN     | 24.9337 | 25.9237 | 25.6923 | 25.7303 | Q14320;B058I6;Q      | Q14320;B058I6    | Protein FAM50A      | FAM50A          |         |
| NaN     | 22.5671 | Q9BSJ6;f3L419;f3     | Q9BSJ6;f3L419;f3 | Protein FAM64A      | FAM64A          |         |
| 25.5183 | 24.9443 | 25.5547 | 25.0934 | 25.0111 | 25.3876 | 25.578  | 25.383  | 25.5863 | 25.5516 | 25.1665 | 25.2612 | Q6ZS17;Q6ZS17-2      | Q6ZS17;Q6ZS17-2  | Protein FAM65A      | FAM65A          |         |
| 22.5952 | NaN     | NaN     | 22.5788 | NaN     | Q9H4H8;A0A087v       | Q9H4H8;A0A087v   | Protein FAM83D      | FAM83D          |         |
| 22.7206 | NaN     | A6ND36;A6ND36-       | A6ND36           | Protein FAM83G      | FAM83G          |         |
| 26.3896 | 25.5314 | 25.786  | 26.1245 | 25.3778 | 25.6105 | 24.7181 | 24.5326 | 24.5806 | 25.295  | 24.8607 | 24.6972 | Q658Y4;E7ER68;H      | Q658Y4;E7ER68    | Protein FAM91A1     | FAM91A1         |         |
| 23.6992 | NaN     | 23.0499 | 23.3076 | NaN     | Q9H5X1;H0YKV4;f      | Q9H5X1;H0YKV4;f  | MIP18 family prot   | FAM96A          |         |
| 26.1618 | 25.6904 | 25.4824 | 25.9909 | 25.3852 | 25.4903 | 25.1787 | 25.2471 | 25.0637 | 25.1483 | 25.0001 | 25.2013 | Q9Y3D0;H3BNV7        | Q9Y3D0;H3BNV7    | Mitotic spindle-as  | FAM96B          |         |
| 25.8535 | 25.1342 | 24.8451 | 25.3884 | 24.8457 | 25.24   | 24.4937 | NaN     | 25.0503 | 24.6131 | 25.0648 | 24.3616 | Q8NCA5;Q8NCA5        | Q8NCA5;Q8NCA5    | Protein FAM98A      | FAM98A          |         |
| 24.3903 | 24.072  | 24.0427 | 24.3089 | 24.044  | NaN     | NaN     | 23.7624 | 22.7085 | 24.5715 | 24.5738 | 24.0845 | Q52LJ0-2;Q52LJ0      | Q52LJ0-2;Q52LJ0  | Protein FAM98B      | FAM98B          |         |
| 19.5214 | NaN     | Q17RN3;K7EQL1;f      | Q17RN3;K7EQL1;f  | Protein FAM98C      | FAM98C          |         |
| 25.3545 | 23.9593 | 24.4439 | 25.0814 | NaN     | 23.8463 | 23.9806 | NaN     | NaN     | NaN     | NaN     | NaN     | Q8WVX9;E9PNW         | Q8WVX9;E9PNW     | Fatty acyl-CoA rec  | FAR1            |         |
| 26.6508 | 26.7804 | 27.7806 | 26.7972 | 26.7903 | 27.9654 | 26.9601 | 26.4399 | 26.063  | 27.6065 | 27.0962 | 26.7589 | Q9Y4F1;C9JME2;C      | Q9Y4F1;C9JME2;C  | FERM, RhoGEF an     | FARP1           |         |
| 23.6745 | 23.8415 | 24.8688 | 23.922  | 23.648  | 25.0478 | NaN     | NaN     | NaN     | 24.7414 | 24.2431 | 24.0056 | Q94887;Q94887-3      | Q94887;Q94887-3  | FERM, RhoGEF an     | FARP2           |         |
| 27.7993 | 27.7783 | 27.5334 | 27.7568 | 28.156  | 27.6921 | 26.7891 | 27.5756 | 27.1171 | 27.7211 | 28.4193 | 27.121  | Q9Y285;K7ER00;C      | Q9Y285;K7ER00;C  | Phenylalanine-tr    | FARSA           |         |



|     |         |         |         |         |         |         |         |         |         |         |         |         |                                                                   |
|-----|---------|---------|---------|---------|---------|---------|---------|---------|---------|---------|---------|---------|-------------------------------------------------------------------|
|     | 28.166  | 27.6736 | 27.5102 | 28.1273 | 28.1281 | 27.6277 | 26.902  | 27.9394 | 27.682  | 27.8707 | 28.5069 | 27.8343 | Q9NSD9;Q9NSD9- Q9NSD9;Q9NSD9- Phenylalanine--tR FARSB             |
| NaN | NaN     | NaN     | NaN     | NaN     | NaN     | NaN     | NaN     | NaN     | NaN     | 23.0926 | NaN     | NaN     | P25445;P25445-6 P25445;P25445-6 Tumor necrosis fa FAS             |
|     | 32.8866 | 31.9493 | 32.45   | 32.8983 | 32.1176 | 32.3727 | 33.0482 | 33.2725 | 32.5421 | 33.0687 | 32.9198 | 32.5087 | P49327;A0A0U1R P49327;A0A0U1R Fatty acid synthas FASN             |
|     | 22.7516 | NaN     | NaN     | 22.4435 | NaN     | 21.4318 | NaN     | NaN     | NaN     | NaN     | NaN     | NaN     | Q9NYY8;Q9NYY8- Q9NYY8;Q9NYY8- FAST kinase doma FASTKD2            |
|     | 25.027  | 24.8057 | 24.8973 | 24.4129 | 24.3316 | 23.5701 | 26.8409 | 26.2223 | 26.5378 | 27.4885 | 26.6103 | 26.8774 | Q14517;A0A087W Q14517;A0A087W Protocadherin Fat FAT1              |
|     | 25.2135 | 24.5699 | 25.4007 | 24.6982 | 24.7398 | 24.8382 | 25.3118 | 26.7085 | 25.6579 | 25.1516 | 25.982  | 25.5038 | P62861;E9PR30 P62861;E9PR30 40S ribosomal pro FAU                 |
|     | 28.819  | 28.2194 | 28.6382 | 29.5218 | 29.0632 | 28.9939 | 27.0748 | 27.6167 | 27.2922 | 29.1878 | 29.3115 | 28.4507 | P22087;MOQXL5;I rRNA 2-O-methylt FBL                              |
|     | 24.1734 | NaN     | NaN     | 24.8977 | NaN     | NaN     | NaN     | NaN     | NaN     | 23.668  | NaN     | NaN     | A6NHQ2 A6NHQ2 rRNA/tRNA 2-O-r FBL1                                |
| NaN | NaN     | NaN     | NaN     | NaN     | NaN     | NaN     | NaN     | NaN     | 23.4214 | NaN     | NaN     | NaN     | P23142-4;B1AHL2 P23142-4;B1AHL2 Fibulin-1 FBLN1                   |
| NaN | NaN     | NaN     | NaN     | NaN     | NaN     | NaN     | 24.2214 | NaN     | NaN     | NaN     | NaN     | NaN     | P35555 P35555 Fibrillin-1 FBN1                                    |
| NaN | NaN     | NaN     | NaN     | 21.3137 | NaN     | NaN     | NaN     | NaN     | NaN     | 20.6306 | NaN     | NaN     | Q9NXX8;Q9NXX8- Q9NXX8;Q9NXX8- F-box/LRR-repeat FBXL12             |
|     | 24.736  | 23.2358 | 23.7427 | 24.217  | 23.353  | 23.9346 | 23.2451 | NaN     | 22.5059 | 23.7426 | 23.8101 | NaN     | Q96ME1-4;Q96M Q96ME1-4;Q96M F-box/LRR-repeat FBXL18               |
| NaN | NaN     | NaN     | 20.929  | 20.4288 | NaN     | Q96IG2;J3KTA1;Q Q96IG2;J3KTA1;Q F-box/LRR-repeat FBXL20           |
| NaN | NaN     | NaN     | NaN     | 21.18   | NaN     | Q8N531;Q8N531- Q8N531;Q8N531- F-box/LRR-repeat FBXL6              |
|     | 23.0816 | NaN     | 22.6984 | 22.2364 | NaN     | 22.0549 | NaN     | NaN     | NaN     | 22.2814 | NaN     | NaN     | O94952;H0YIE9;Q O94952;H0YIE9;Q F-box only protein FBXO21         |
|     | 24.8942 | 24.4092 | 24.49   | 24.5935 | 24.4567 | 24.3498 | NaN     | NaN     | NaN     | 24.2294 | 24.5659 | 23.9727 | Q8NEZ5;Q8NEZ5- Q8NEZ5;Q8NEZ5- F-box only protein FBXO22           |
|     | 22.5016 | NaN     | 22.3474 | 22.8704 | 22.8884 | 22.3942 | NaN     | NaN     | NaN     | 22.0138 | 22.1597 | NaN     | Q6PIJ6;Q6PIJ6-3;C Q6PIJ6;Q6PIJ6-3;C F-box only protein FBXO38     |
| NaN | NaN     | NaN     | NaN     | 20.633  | NaN     | POC2W1;C9JLC0 POC2W1;C9JLC0 F-box/SPRY doma FBXO45                |
|     | 22.0997 | 21.8541 | 22.0287 | 21.9357 | 21.9706 | NaN     | 22.3084 | NaN     | NaN     | 22.118  | NaN     | NaN     | Q9Y3I1;Q9Y3I1-3; Q9Y3I1;Q9Y3I1-3; F-box only protein FBXO7        |
|     | 22.7157 | NaN     | Q9UKB1;Q9UKB1- Q9UKB1;Q9UKB1- F-box/WD repeat- FBXW11;BTRC        |
|     | 26.8616 | 27.0022 | 26.8146 | NaN     | 27.1591 | NaN     | NaN     | NaN     | NaN     | 27.6002 | 27.4902 | NaN     | Q0JRZ9;Q0JRZ9-3; Q0JRZ9;Q0JRZ9-3; F-BAR domain onl FCHO2          |
| NaN | NaN     | NaN     | 20.7862 | NaN     | Q86WN1;E5RGB1 Q86WN1;E5RGB1 F-BAR and double FCHSD1               |
| NaN | NaN     | NaN     | NaN     | NaN     | NaN     | NaN     | NaN     | NaN     | NaN     | 20.2209 | NaN     | NaN     | P37268;E9PNM1;I P37268;E9PNM1;I Squalene synthas FDF1             |
|     | 28.0174 | 28.3032 | 28.3703 | 27.6139 | 27.8823 | 28.0947 | 28.5471 | 28.6682 | 27.9786 | 28.6034 | 28.3986 | 28.008  | P14324;P14324-2 P14324;P14324-2 Farnesyl pyrophosph FOPS          |
|     | 24.9363 | 24.2755 | 24.4636 | 25.005  | 24.5387 | 24.3381 | NaN     | NaN     | NaN     | 24.6544 | 24.7096 | NaN     | P22570;A0A0A0M P22570;A0A0A0M NADPH:adrenodo FDXR                 |
|     | 28.0777 | 27.8107 | 27.76   | 27.9659 | 28.0569 | 28.0511 | 27.1629 | 27.5968 | 27.6727 | 28.3416 | 28.2046 | 28.3755 | P39748;P39748-2 P39748;P39748-2 Flap endonuclease FEN1            |
|     | 22.8867 | NaN     | 22.6695 | 22.5901 | NaN     | 22.4876 | NaN     | NaN     | NaN     | NaN     | 22.6109 | NaN     | P16591;P16591-2 P16591;P16591-2 Tyrosine-protein k FER            |
|     | 23.9485 | 23.5369 | 23.438  | 23.5466 | 23.3668 | 23.6667 | 24.1379 | 23.7081 | 24.9625 | 24.4927 | 24.5065 | 24.6315 | Q9BQL6;G3V1L6;C Q9BQL6;G3V1L6;C Fermitin family hc FERMT1         |
|     | 29.0079 | 29.429  | 29.7096 | 28.8816 | 29.4039 | 29.7515 | 29.5184 | 29.4075 | 29.6943 | 29.6497 | 29.4159 | 29.5951 | Q96AC1;Q96AC1- Q96AC1;Q96AC1- Fermitin family hc FERMT2           |
|     | 28.6907 | 27.8348 | 27.8822 | 28.505  | 27.8709 | 28.0781 | 28.6356 | 27.5378 | 28.0811 | 29.1231 | 28.6099 | 28.4676 | Q86UX7;Q86UX7- Q86UX7;Q86UX7- Fermitin family hc FERMT3           |
| NaN | NaN     | NaN     | 29.5506 | NaN     | NaN     | 30.1882 | 30.1624 | 29.7629 | NaN     | NaN     | NaN     | 28.6499 | Q8TAT2 Q8TAT2 Fibroblast growth FGFBP3                            |
|     | 27.5923 | 28.5718 | 27.7593 | 27.4071 | 28.4139 | 27.7042 | 27.8674 | 28.691  | 28.6056 | 27.8075 | 28.1631 | 28.4294 | P07954;P07954-2 P07954;P07954-2 Fumarate hydratase FH             |
| NaN | NaN     | NaN     | 21.6645 | NaN     | Q13642-1;Q1364 Q13642-1;Q13642 Four and a half LIM FHL1           |
|     | 25.0518 | 24.1023 | 24.6457 | 24.3134 | 24.4903 | 24.5945 | 24.6283 | NaN     | 24.8443 | 25.0914 | 24.7539 | 25.3326 | Q9Y613;H3BVE7;J Q9Y613 FH1/FH2 domain- FHD01                      |
|     | 25.4333 | 24.6281 | 25.1544 | 25.4113 | 24.734  | 24.9779 | 24.4565 | NaN     | 24.5877 | 25.1522 | 25.1827 | 25.4092 | O43427;O43427-2 O43427;O43427-2 Acidic fibroblast g FIBP          |
|     | 23.8015 | NaN     | 23.9513 | 24.3919 | NaN     | NaN     | NaN     | NaN     | NaN     | 24.8259 | NaN     | NaN     | Q92562;Q5TCS5;J Q92562;Q5TCS5 Polyphosphoinosit FIG4              |
|     | 23.1741 | 22.4245 | 22.335  | 23.0641 | 22.5276 | NaN     | NaN     | NaN     | NaN     | 22.5198 | 22.3213 | NaN     | Q6UN15-3;Q6UN Q6UN15-3;Q6UN Pre-mRNA 3-end-;F1L11                 |
|     | 23.3264 | 23.4308 | 23.5012 | 23.0019 | NaN     | NaN     | 23.4476 | NaN     | NaN     | 22.3927 | NaN     | NaN     | Q9Y3D6 Q9Y3D6 Mitochondrial fiss FIS1                             |
|     | 24.009  | 24.6179 | 24.4357 | 24.1223 | 24.402  | 24.2924 | 25.4191 | 25.363  | 25.8033 | 25.0822 | 25.1694 | 24.5735 | Q96AY3;H0Y827;K Q96AY3 Peptidyl-prolyl cis FKBP10                 |
| NaN | NaN     | NaN     | 23.3105 | NaN     | Q9NYL4;F8VU90;C Q9NYL4;F8VU90;C Peptidyl-prolyl cis FKBP11        |
| NaN | NaN     | NaN     | NaN     | 21.2593 | NaN     | Q5T1M5;A0A0A0I Q5T1M5;A0A0A0I FK506-binding prc FKBP15            |
|     | 28.5328 | 29.3875 | 28.9932 | 28.0172 | 28.2887 | 28.898  | 29.1654 | 28.5922 | 28.6768 | 29.1581 | 29.0832 | 28.9109 | P62942;Q5W0X3; P62942;Q5W0X3; Peptidyl-prolyl cis FKBP1A;FKBP12-E |
|     | 24.8724 | 25.4883 | 25.1281 | 24.3315 | 25.6139 | 25.2625 | 25.0694 | 26.9876 | 26.7077 | 24.8861 | 25.7077 | 25.8514 | P26885;F5H0N4 P26885 Peptidyl-prolyl cis FKBP2                    |
|     | 27.2353 | 28.35   | 27.5156 | 27.0164 | 28.0571 | 27.5126 | 26.3111 | 25.1077 | 26.1202 | 26.0963 | 26.1966 | 26.4015 | Q00688;G3V5F2 Q00688 Peptidyl-prolyl cis FKBP3                    |
|     | 28.5276 | 28.8324 | 28.311  | 28.2077 | 28.9336 | 28.2651 | 28.5397 | 28.9991 | 29.1448 | 28.2914 | 28.5823 | 29.4185 | Q02790;H0YFG2;f Q02790 Peptidyl-prolyl cis FKBP4                  |
|     | 26.383  | 25.9194 | 25.6108 | 26.0034 | 25.6849 | 25.4774 | 24.8205 | NaN     | NaN     | 25.6729 | 25.9373 | 25.9656 | Q13451;Q13451- Q13451 Peptidyl-prolyl cis FKBP5                   |
|     | 23.5571 | 23.198  | 23.5262 | 23.454  | 22.9345 | 23.3339 | 23.573  | 24.1483 | 23.5615 | 22.6195 | 22.7744 | NaN     | Q14318;Q14318- Q14318;Q14318-2 Peptidyl-prolyl cis FKBP8          |
| NaN | NaN     | NaN     | 20.9546 | 21.1505 | NaN     | Q8NFF5;Q8NFF5- Q8NFF5;Q8NFF5- FAD synthase;Mo FLAD1               |
|     | 22.7544 | NaN     | 22.1435 | 22.7092 | 22.1834 | 22.5429 | NaN     | NaN     | NaN     | NaN     | NaN     | NaN     | Q8NFG4;Q8NFG4 Q8NFG4 Folliculin FLCN                              |
|     | 28.0237 | 27.1094 | 27.7584 | 28.1055 | 27.4286 | 27.7078 | 27.7593 | 27.9637 | 27.6083 | 28.1267 | 28.0461 | 27.7147 | Q13045;Q13045- Q13045;Q13045-3 Protein flightless- FLII           |
| NaN | NaN     | NaN     | 23.2274 | NaN     | Q13045-2 Q13045-2 Protein flightless- FLII                        |
|     | 32.5229 | 32.6557 | 32.8982 | 32.3713 | 32.4995 | 33.0423 | 32.9279 | 32.4495 | 31.7842 | 33.0196 | 32.6374 | 32.3989 | P21333;P21333-2 P21333;P21333-2 Filamin-A FLNA                    |
|     | 26.8258 | 27.2771 | 27.6168 | 27.0711 | 27.649  | 28.0295 | 27.7856 | 27.7667 | 27.0869 | 27.6218 | 27.9022 | 28.0372 | Q60FE5;A0A087W Q60FE5;A0A087WWW3 FLNA                             |
|     | 26.1149 | NaN     | 25.2809 | 26.4686 | 25.6832 | 25.296  | NaN     | NaN     | NaN     | 26.5314 | 26.0961 | NaN     | O75369;O75369- Q75369;O75369-2 Filamin-B FLNB                     |
|     | 32.656  | 32.1429 | 32.1979 | 32.7676 | 32.0828 | 32.2469 | 33.4501 | 32.7358 | 32.3394 | 33.5251 | 33.0742 | 32.8797 | O75369-8 O75369-8 Filamin-B FLNB                                  |
|     | 30.6855 | 30.3223 | 30.3541 | 30.7058 | 30.1713 | 30.1813 | 21.2136 | 30.6806 | 29.7498 | 30.7548 | 30.2564 | 30.1938 | Q14315;Q14315- Q14315;Q14315-2 Filamin-C FLNC                     |
|     | 28.4851 | 28.294  | 28.507  | 28.7847 | 28.5633 | 28.7808 | 27.9346 | 27.3648 | 28.5413 | 28.3187 | 28.1301 | 28.5523 | O75955;O75955-2 O75955;O75955-2 Flotillin-1 FLOT1                 |
|     | 28.0034 | 27.0938 | 27.4349 | 27.8093 | 27.0845 | 27.5019 | 26.6937 | 26.5676 | 27.3681 | 27.2361 | 26.6497 | 27.1599 | Q14254;J3QLD9;E Q14254;J3QLD9;E Flotillin-2 FLOT2                 |
|     | 22.6014 | NaN     | 23.2194 | 22.7215 | NaN     | 23.2532 | 23.5921 | NaN     | NaN     | 23.6947 | 23.6755 | NaN     | Q9Y5Y0;H7C322;C Q9Y5Y0;H7C322;C Feline leukemia vi FLVCR1         |
| NaN | NaN     | 22.3912 | NaN     | Q96CP2;J3L1Y9 Q96CP2;J3L1Y9 FLYWCH family m FLYWCH2               |



|         |         |         |         |         |         |         |         |         |         |         |         |                  |                  |                      |                   |        |                    |     |
|---------|---------|---------|---------|---------|---------|---------|---------|---------|---------|---------|---------|------------------|------------------|----------------------|-------------------|--------|--------------------|-----|
| 29.2657 | 29.0509 | 29.668  | 28.9002 | 28.8972 | 29.7005 | 29.1119 | 28.1243 | 28.6811 | 29.469  | 29.2813 | 29.0569 | O95466-2;O95466  | O95466-2;O95466  | Formin-like protei   | FMNL1             |        |                    |     |
| 26.8964 | 26.3984 | 27.0213 | 26.505  | 26.3615 | 27.0392 | 26.9173 | 25.8675 | 25.9631 | 27.9938 | 26.7212 | 26.3511 | Q96PY5;Q96PY5-3  | Q96PY5;Q96PY5-3  | Formin-like protei   | FMNL2             |        |                    |     |
| 24.194  | 24.4676 | 25.8616 | 24.3765 | 24.8676 | 25.4437 | 25.1638 | NaN     | NaN     | 24.1288 | 25.8846 | 25.7548 | Q81VF7;Q81VF7-2; | Q81VF7;Q81VF7-2; | Formin-like protei   | FMNL3             |        |                    |     |
| 23.5316 | 23.8351 | 23.8514 | 23.2061 | 23.5268 | 23.8764 | NaN     | NaN     | NaN     | NaN     | NaN     | NaN     | Q06787;Q06787-1  | Q06787;Q06787-1  | Fragile X mental r   | FMR1              |        |                    |     |
| NaN     | NaN     | 23.1523 | NaN     | R9WNIO           | R9WNIO           |                      | FMR1              |        |                    |     |
| 27.474  | 28.0078 | 28.483  | 25.7548 | 27.0677 | 27.7359 | 31.3108 | 30.6042 | 28.7218 | 28.4863 | 27.7351 | 27.3001 | P02751;P02751-5  | P02751;P02751-5  | Fibronectin;Anast    | FN1               |        |                    |     |
| 25.6299 | 25.3791 | 24.6423 | 25.1822 | 25.0955 | 24.8167 | 24.3254 | NaN     | NaN     | 25.6197 | 25.6879 | 24.7299 | Q9HA64;I3L2G3;I: | Q9HA64           | Ketosamine-3-kin.    | FN3KRP            |        |                    |     |
| 25.615  | 25.9383 | 25.747  | 25.1868 | 25.2356 | 25.1617 | 25.703  | 25.7898 | 25.5953 | 25.2678 | 25.6038 | 25.4766 | Q96RU3;Q96RU3    | Q96RU3;Q96RU3    | Formin-binding pr    | FNBP1             |        |                    |     |
| 21.707  | NaN     | NaN     | 21.7073 | NaN     | Q9Y2H6;Q9Y2H6    | Q9Y2H6;Q9Y2H6    | Fibronectin type-I   | FNDC3A            |        |                    |     |
| 22.3865 | 22.6028 | 23.0415 | 22.243  | 21.8613 | 22.6978 | NaN     | NaN     | NaN     | NaN     | NaN     | NaN     | Q53EP0;Q53EP0-1  | Q53EP0;Q53EP0-2  | Fibronectin type II  | FNDC3B            |        |                    |     |
| NaN     | 22.6891 | NaN     | NaN     | Q8TF40;A0A087W   | Q8TF40;A0A087W   | Folliculin-interacti | FNIP1             |        |                    |     |
| 25.5137 | 24.4047 | 24.1171 | 24.6976 | 24.028  | NaN     | NaN     | NaN     | NaN     | NaN     | 24.8442 | 23.9868 | P49354;B3KVN2;E  | P49354;B3KVN2;E  | Protein farnesyltr   | FNTA              |        |                    |     |
| NaN     | 23.2407 | 23.1565 | 21.4505 | NaN     | P15407;E9PPX2;P  | P15407;E9PPX2;P  | Fos-related antige   | FOSL1             |        |                    |     |
| 24.6742 | 24.5421 | 24.6473 | 25.1988 | 24.9125 | 24.774  | NaN     | NaN     | NaN     | 24.6077 | 25.0054 | NaN     | P85037;P85037-2  | P85037;P85037-2  | Forkhead box prot    | FOXK1             |        |                    |     |
| 23.2138 | 23.1196 | 23.5419 | 23.7091 | 23.4837 | 23.4176 | NaN     | NaN     | NaN     | NaN     | 23.4451 | 23.5548 | Q14331;Q9BZ01;E  | Q14331;Q9BZ01;E  | Protein FRG1;Prot    | FRG1;FRG1B        |        |                    |     |
| 21.012  | NaN     | Q9P2Q2;F8WAN4    | Q9P2Q2;F8WAN4    | FERM domain-cor      | FRMD4A            |        |                    |     |
| 26.8143 | 26.2944 | 27.049  | 26.7705 | 26.0122 | 27.0207 | 27.0948 | 25.6871 | 26.3048 | 27.4832 | 26.6921 | 26.4511 | Q96NE9-2;G3V4T   | Q96NE9-2;G3V4T   | FERM domain-cor      | FRMD6             |        |                    |     |
| 23.0681 | 24.5056 | 24.8306 | 23.3807 | 24.7633 | 25.4167 | 24.4754 | 24.7295 | 25.0535 | 25.4839 | 24.9426 | NaN     | Q9BZ67;Q9BZ67-1  | Q9BZ67;Q9BZ67-2  | FERM domain-cor      | FRMD8             |        |                    |     |
| 27.0029 | 26.1282 | 27.0653 | 27.0389 | 26.4559 | 26.4086 | 23.7989 | 23.5541 | 25.5481 | 25.993  | 25.9811 | 25.7422 | O94915;F2Z2S2;H  | O94915;F2Z2S2    | Protein furry hom    | FRYL              |        |                    |     |
| 28.5874 | 29.1425 | 28.9534 | 28.3869 | 29.0656 | 28.8377 | 29.8024 | 29.4073 | 29.6675 | 29.6826 | 29.7638 | 29.5974 | Q16658;C9JFC0;A  | Q16658           | Fascin               | FSCN1             |        |                    |     |
| 23.6972 | 23.0692 | 24.0144 | 23.0103 | NaN     | NaN     | 28.2231 | 28.8821 | 25.1062 | 24.0754 | NaN     | NaN     | P19883-2;P19883  | P19883-2;P19883  | Follistatin          | FST               |        |                    |     |
| 25.3619 | 25.6292 | 23.9098 | 24.2876 | 24.4855 | 24.0547 | 27.3468 | NaN     | 23.7711 | 24.6951 | 24.199  | NaN     | Q12841;Q12841-1  | Q12841;Q12841-2  | Follistatin-related  | FSTL1             |        |                    |     |
| 24.7901 | 26.0178 | 25.6105 | 24.2754 | 25.3064 | 25.4279 | 26.8895 | 26.9178 | 25.2165 | 26.2431 | 26.4001 | NaN     | P02794;G3V192;C  | P02794;G3V192;C  | Ferritin heavy cha   | FTH1              |        |                    |     |
| NaN     | 24.1614 | NaN     | NaN     | 23.2156 | NaN     | 24.3162 | 25.0241 | 25.0098 | NaN     | 25.2068 | NaN     | P02792;A0A087X:  | P02792;A0A087X:  | Ferritin light chain | FTL               |        |                    |     |
| 22.3786 | NaN     | NaN     | 21.8197 | NaN     | 21.8141 | NaN     | NaN     | NaN     | NaN     | 22.961  | 22.2595 | NaN              | NaN              | NaN                  | Q9C0B1;Q9C0B1-1   | Q9C0B1 | Alpha-ketoglutarat | FTO |
| 24.214  | 23.2894 | 23.5722 | 24.6656 | NaN     | 23.8707 | 23.6748 | NaN     | NaN     | NaN     | NaN     | NaN     | Q9UET6;Q9UET6-1  | Q9UET6;Q9UET6-1  | Putative tRNA (cy    | FTSJ1)            |        |                    |     |
| 25.4602 | 23.9306 | 24.3735 | 26.0794 | 24.8044 | 24.9497 | NaN     | NaN     | NaN     | NaN     | 23.2458 | 23.6091 | NaN              | NaN              | NaN                  | pre-rRNA processi | FTSJ3  |                    |     |
| 27.901  | 28.2454 | 28.201  | 28.1879 | 28.347  | 28.4238 | 27.2814 | 27.9605 | 27.3154 | 28.3796 | 28.6665 | 28.8173 | Q96AE4;E9PEB5    | Q96AE4;E9PEB5    | Far upstream eler    | FUBP1             |        |                    |     |
| 27.1776 | 26.5609 | 26.3809 | 26.913  | 26.5144 | 26.5325 | 25.2509 | 26.1446 | 25.6383 | 25.7969 | 26.2218 | 26.18   | Q96I24;Q96I24-2  | Q96I24           | Far upstream eler    | FUBP3             |        |                    |     |
| NaN     | P04066           | P04066           | Tissue alpha-L-fuc   | FUCA1             |        |                    |     |
| 23.6885 | 23.0265 | 22.3786 | 22.6464 | 22.4269 | 23.599  | 25.6587 | 23.9782 | 23.2389 | 24.1921 | 23.4054 | NaN     | Q9BTY2;Q9BTY2-1  | Q9BTY2;Q9BTY2-2  | Plasma alpha-L-fu    | FUCA2             |        |                    |     |
| 27.7364 | 26.9633 | 27.0005 | 27.2002 | 26.7303 | 27.022  | 26.2543 | 26.5858 | 25.6239 | 27.6269 | 27.1826 | 27.3416 | P35637;H3BPET7;P | P35637;H3BPET7;P | RNA-binding prot     | FUS               |        |                    |     |
| 26.7643 | 26.7662 | 26.7357 | 26.9293 | 26.8528 | 26.9579 | 26.8492 | 26.8198 | 26.5234 | 26.2015 | 26.5328 | 26.5328 | Q9BYC5;G3XAD2;   | Q9BYC5;G3XAD2;   | Alpha-(1,6)-fucos    | FUT8              |        |                    |     |
| 28.6804 | 28.3937 | 28.0016 | 28.8081 | 28.2313 | 28.216  | 27.0116 | 27.4158 | 27.5361 | 27.3983 | 27.7496 | 27.3837 | P51114;B4DXZ6;P  | P51114;B4DXZ6;P  | Fragile X mental r   | FXR1              |        |                    |     |
| 27.9664 | 26.9898 | 26.8388 | 27.6313 | 26.7769 | 26.5301 | 25.7288 | 25.4154 | 25.5567 | 25.6507 | 25.6183 | 24.9487 | P51116;I3L122;A  | P51116           | Fragile X mental r   | FXR2              |        |                    |     |
| 25.7099 | 25.0314 | 24.3585 | 24.7599 | 25.0918 | NaN     | NaN     | 24.3079 | 25.9036 | NaN     | 24.2305 | 25.3416 | Q9BQS8;Q9BQS8-   | Q9BQS8;Q9BQS8-   | FYVE and coiled-c    | FYCO1             |        |                    |     |
| 23.7472 | 23.9059 | 24.45   | 24.1439 | 23.4639 | 24.254  | NaN     | NaN     | NaN     | 24.2938 | 23.8899 | NaN     | P06241;P06241-2  | P06241;P06241-2  | Tyrosine-protein k   | FYN               |        |                    |     |
| 24.73   | 24.0897 | 25.158  | 24.8703 | 24.859  | 25.54   | 23.9153 | NaN     | NaN     | 24.3894 | 25.3277 | 24.6944 | Q14332           | Q14332           | Frizzled-2           | FZD2              |        |                    |     |
| NaN     | NaN     | 23.5042 | NaN     | NaN     | 24.2463 | NaN     | NaN     | NaN     | NaN     | NaN     | NaN     | O60353;O60353-2  | O60353;O60353-2  | Frizzled-6           | FZD6              |        |                    |     |
| 28.7572 | 28.6266 | 28.4669 | 28.1563 | 28.2274 | 28.0859 | 28.4735 | 29.454  | 28.2787 | 28.2397 | 28.52   | 28.9304 | Q13283;E5RI26;E  | Q13283           | Ras GTPase-activ     | G3BP1             |        |                    |     |
| 26.8959 | 25.9245 | 26.3658 | 26.6585 | 25.9969 | 26.1683 | 25.6687 | 27.2048 | NaN     | 26.1248 | 26.1712 | 26.8559 | Q9UN86-2;Q9UN1   | Q9UN86-2;Q9UN1   | Ras GTPase-activ     | G3BP2             |        |                    |     |
| NaN     | Q9BUM1;K7ESE6    | Q9BUM1;K7ESE6    | Glucose-6-phosph     | G6PC3             |        |                    |     |
| 28.9026 | 29.7341 | 29.9679 | 28.7346 | 29.51   | 29.9889 | 28.9174 | 28.6862 | 28.7177 | 28.8564 | 29.0171 | 28.9097 | P11413;P11413-2  | P11413;P11413-2  | Glucose-6-phosph     | G6PD              |        |                    |     |
| 24.7605 | 25.221  | 24.4654 | 24.3975 | 24.6991 | 24.2395 | 26.2843 | 26.0645 | 25.7358 | 25.2094 | 25.1761 | 24.9032 | P10253;I3LO55;I  | P10253           | Lysosomal alpha-g    | GAA               |        |                    |     |
| 27.3417 | 26.1901 | 26.8635 | 25.7535 | 24.602  | 25.3827 | 27.2722 | 25.5878 | 25.1878 | 24.8091 | 24.4932 | NaN     | Q9S166;H6UM11;   | Q9S166;H6UM11;   | Gamma-aminobu        | GABARAP           |        |                    |     |
| 23.7459 | 23.9913 | 24.6566 | NaN     | 24.4823 | NaN     | 24.571  | NaN     | NaN     | NaN     | NaN     | NaN     | Q9HOR8;F5GZY7;C  | Q9HOR8;F5GZY7;C  | Gamma-aminobu        | GABARAPL1         |        |                    |     |
| 26.9959 | 26.403  | 27.2597 | 25.7533 | 25.0023 | 26.3837 | 28.5184 | 27.1446 | 27.2614 | 27.171  | 25.9904 | 26.465  | P60520;H3BSM5;   | P60520;H3BSM5;   | Gamma-aminobu        | GABARAPL2         |        |                    |     |
| NaN     | NaN     | NaN     | 20.1591 | NaN     | Q8TAE8           | Q8TAE8           | Growth arrest an     | GADD45GIP1        |        |                    |     |
| 23.6436 | 22.6858 | 23.1623 | 23.4495 | NaN     | 22.9689 | 23.0809 | NaN     | NaN     | 22.922  | 23.0507 | NaN     | O14976;O14976-1  | O14976;O14976-2  | Cyclin-G-associate   | GAK               |        |                    |     |
| NaN     | NaN     | NaN     | NaN     | NaN     | NaN     | 25.1251 | NaN     | NaN     | NaN     | NaN     | NaN     | P22466           | P22466           | Galanin peptides;    | GAL               |        |                    |     |
| 24.5705 | NaN     | 23.9084 | 23.7232 | NaN     | P54803;A0A087W   | P54803;A0A087W   | Galactocerebrosc     | GALC              |        |                    |     |
| 27.5445 | 26.7392 | 27.1633 | 27.5027 | 26.7075 | 27.1179 | 26.3899 | 26.3419 | 26.7415 | 26.9446 | 26.7491 | 26.7756 | Q14376;Q14376-1  | Q14376;Q14376-2  | UDP-glucose-4-ep     | GALE              |        |                    |     |
| 27.7196 | 27.2033 | 27.4054 | 27.4687 | 27.5325 | 27.5057 | 26.5148 | 26.2918 | 26.7585 | 27.1283 | 27.3821 | 26.9207 | P51570;P51570-2  | P51570;P51570-2  | Galactokinase        | GALK1             |        |                    |     |
| 22.1331 | 28.8908 | 22.4417 | 21.5444 | 22.8623 | 22.4703 | 23.2807 | 21.6721 | 23.1464 | 23.0556 | 22.6987 | 23.2648 | Q96C23;H7C320;   | Q96C23;H7C320;   | 1-epimerase          | GALM              |        |                    |     |
| 25.0544 | 24.8922 | 25.4234 | 25.16   | 25.265  | 25.4351 | 25.1345 | 24.8778 | 25.3305 | 24.9512 | 24.6365 | 24.8201 | O10471;Q10471-1  | Q10471           | Polypeptide N-ac     | GALNT2            |        |                    |     |
| 22.3982 | 22.6378 | 23.015  | 22.8963 | 23.091  | NaN     | 24.9078 | NaN     | NaN     | 22.8216 | NaN     | NaN     | Q8NCL4;S4R355    | Q8NCL4           | Polypeptide N-ac     | GALNT6            |        |                    |     |
| 23.5874 | 23.8646 | 24.3504 | 23.7001 | 24.2013 | 24.0541 | 24.9439 | NaN     | NaN     | 24.0773 | 24.2037 | NaN     | Q86SF2;HOYAH3;   | Q86SF2;HOYAH3    | N-acetylglalactos    | GALNT7            |        |                    |     |
| NaN     | 22.5372 | NaN     | NaN     | P07902;G3V3U5;C  | P07902;G3V3U5;C  | Galactose-1-phos     | GALT              |        |                    |     |
| 23.5665 | 23.1707 | 23.1308 | 23.2646 | 23.5008 | NaN     | NaN     | NaN     | NaN     | 24.3829 | 24.3255 | 24.5644 | Q14353;Q14353-1  | Q14353;Q14353-2  | Guanidinooacetate    | GAMT              |        |                    |     |
| NaN     | 22.7438 | NaN     | NaN     | NaN     | NaN     | NaN     | NaN     | 22.4465 | NaN     | NaN     | 22.7433 | Q9H2C0           | Q9H2C0           | Gigaxonin            | GAN               |        |                    |     |



|     |         |         |         |         |         |         |         |         |         |         |         |         |                   |                  |                     |                     |                   |                     |                   |       |
|-----|---------|---------|---------|---------|---------|---------|---------|---------|---------|---------|---------|---------|-------------------|------------------|---------------------|---------------------|-------------------|---------------------|-------------------|-------|
|     | 30.4094 | 30.8744 | 30.6868 | 30.4955 | 30.9388 | 30.6746 | 31.1089 | 31.7316 | 31.7387 | 30.8201 | 30.8961 | 30.9543 | Q14697;F5H6X6     | Q14697;F5H6X6    | Neutral alpha-gluc  | GANAB               |                   |                     |                   |       |
|     | 34.1457 | 34.806  | 34.4355 | 34.109  | 34.5219 | 34.454  | 34.7752 | 34.4732 | 34.3758 |         | 35.076  | 35.4903 | 34.4217           | P04406;P04406-2  | P04406;P04406-2     | Glyceraldehyde-3    | GAPDH             |                     |                   |       |
|     | 24.9487 | 24.9011 | 24.7821 | 24.6862 | 24.9739 | 25.0449 | 24.5813 | 24.738  | NaN     |         | 24.9135 | 24.6057 | 25.0413           | Q14C86;Q14C86-1  | Q14C86;Q14C86-1     | GTase-activating    | GAPVD1            |                     |                   |       |
|     | 25.0587 | 23.6992 | 24.9434 | 26.0424 | 24.3863 | 25.1422 | 23.3623 | NaN     |         | 23.5904 | 24.2133 | 23.9546 | 23.7035           | Q9NY12;Q9NY12-   | Q9NY12;Q9NY12-      | H/ACA ribonucleo    | GAR1              |                     |                   |       |
|     | 29.5354 | 29.5901 | 29.4886 | 29.3293 | 29.3992 | 29.3658 | 29.8534 | 29.7728 |         | 29.7259 | 29.7768 | 29.639  | 29.7046           | P41250;H7C443    | P41250              | Glycine--tRNA liga  | GARS              |                     |                   |       |
|     | 30.1536 | 29.8474 | 29.8172 | 30.1218 | 29.8221 | 29.8573 | 29.8218 | 29.6909 | 29.697  |         | 29.75   | 29.7622 | 29.814            | P22102;P22102-2  | P22102;P22102-2     | Trifunctional purin | GART              |                     |                   |       |
| NaN |         | NaN     |         | NaN     |         | NaN     |         | NaN     |         |         |         |         |                   |                  |                     | Q99501;A0A5E8;C     | Q99501;A0A5E8;C   | GAS2-like protein   | GAS2L1            |       |
| NaN |         | NaN     |         | NaN     |         | NaN     |         | NaN     |         |         |         |         |                   |                  |                     | Q86XJ1;G3V1N3       | Q86XJ1;G3V1N3     | GAS2-like protein   | GAS2L3            |       |
|     | 26.0222 | 25.4605 | 25.2845 | 25.7433 | 25.9012 | 25.5491 | NaN     | NaN     | NaN     |         |         |         | 24.6798           | 25.2163          | NaN                 | Q86YP4;Q86YP4-      | Q86YP4;Q86YP4-2   | Transcriptional re  | GATAD2A           |       |
|     | 24.0073 | NaN     | 24.6862 | 24.2242 | NaN     | NaN     |         | NaN     | NaN     |         | NaN     |         |                   | NaN              |                     | Q8WXI9;A0A0U1F      | Q8WXI9;A0A0U1F    | Transcriptional re  | GATAD2B           |       |
|     | 26.5643 | 25.9188 | 25.3597 | 25.2666 | 25.7037 | 25.4535 | 26.7853 | 26.4899 | 26.3168 | 26.3569 | 26.3917 | 24.8525 | P04062;A0A0G2Jf   | P04062;A0A0G2Jf  | Glucosylceramida    | GBA                 |                   |                     |                   |       |
|     | 24.5049 | 24.314  | 24.4629 | 24.7648 | 24.8593 | 24.9226 | NaN     | NaN     | 24.9063 | 23.7423 | 24.773  | 24.3446 | O75323;C9K068;f   | O75323;C9K068;f  | Protein NipSnap     | h GBAS              |                   |                     |                   |       |
|     | 28.9472 | 29.2793 | 29.3216 | 28.7913 | 29.1935 | 29.2877 | 29.7843 | 29.5282 | 29.4448 | 29.6114 | 29.4766 | 29.7146 | Q04446;E9PGM4     | Q04446;E9PGM4    | 1,4-alpha-glucan-1  | GBE1                |                   |                     |                   |       |
|     | 27.6112 | 26.528  | 26.7774 | 27.5209 | 26.2695 | 26.6498 | 26.9634 | 26.0375 | 26.0093 | 26.2435 | 26.1408 | 25.022  | Q92538;Q92538-    | Q92538;Q92538-   | Golgi-specific bref | GBF1                |                   |                     |                   |       |
|     | 25.6519 | 26.128  | 25.9211 | 25.1343 | 25.6581 | 26.3572 | 26.1763 | NaN     | 26.2137 | 25.8137 | 25.6032 | 26.1922 | P32455;Q9H0R5;f   | P32455           | Interferon-induce   | GBP1                |                   |                     |                   |       |
|     | 23.5891 | NaN     | 23.3773 | 23.1732 | NaN     | 23.3835 | 22.6223 | NaN     | NaN     |         |         | 23.3569 | 23.0027           | NaN              |                     | P28676;H7C2Z6;H     | P28676;H7C2Z6;H   | Grancalcin          | GCA               |       |
|     | 24.6622 | 23.4457 | 23.479  | 24.7796 | 23.4995 | 23.5723 | NaN     | NaN     | NaN     | 23.2045 | NaN     | NaN     |                   | NaN              |                     | Q92947;Q92947-      | Q92947;Q92947-    | Glutaryl-CoA dehy   | GCDH              |       |
|     | 22.6681 | NaN     | 22.0077 | 22.9497 | 21.6118 | 21.8037 | NaN     | NaN     | NaN     | 21.8293 | 21.6731 | NaN     |                   | NaN              |                     | P16383;P16383-2     | P16383;P16383-2   | GC-rich sequence    | GCFC2             |       |
|     | 24.5622 | 25.2209 | 24.8521 | 24.3721 | 25.1665 | 24.7252 | 24.696  | NaN     | 24.3294 | 24.7162 | 24.8109 | 24.8804 | P48506;E1CEI4;AC  | P48506;E1CEI4;AC | Glutamate--cystei   | GCLC                |                   |                     |                   |       |
|     | 26.3254 | 25.9616 | 25.8951 | 25.952  | 26.126  | 25.8074 | 25.6972 | 25.485  | 26.0726 | 26.2345 | 26.0617 | 26.551  | P48507;P48507-2   | P48507;P48507-2  | Glutamate--cystei   | GCLM                |                   |                     |                   |       |
|     | 30.8685 | 29.5535 | 30.2234 | 30.8976 | 29.9704 | 30.4279 | 29.6127 | 30.049  | 30.0811 | 30.4933 | 30.3442 | 29.9786 | Q92616            | Q92616           | Translational activ | GCN1L1              |                   |                     |                   |       |
| NaN |         | NaN     |         | NaN     |         | NaN     |         | 22.6998 | NaN     |         | NaN     |         |                   | NaN              |                     | Q8NOV5              | Q8NOV5            | N-acetylactosami    | GCNT2             |       |
| NaN |         | 23.762  | 22.6015 | 21.711  | 23.1826 | 22.8103 | NaN     | NaN     |         | 24.0189 | 22.1378 | NaN     | 22.984            | P23434           | P23434              | Glycine cleavage    | GCSC              |                     |                   |       |
|     | 23.7118 | 23.8074 | 24.0029 | 23.8453 | 24.0581 | NaN     | NaN     |         | 24.1118 | NaN     |         | 23.5723 | 23.6671           | 23.7032          | Q99988;A0A0A0A      | Q99988              | Growth/differenti | GDF15               |                   |       |
|     | 27.1032 | 28.0248 | 27.7828 | 26.3708 | 27.9576 | 27.8537 | 27.1717 | 27.194  | 27.866  | 27.1022 | 27.1264 | 27.5429 | P31150;G5E9U5     | P31150           | Rab GDP dissociat   | GDI1                |                   |                     |                   |       |
|     | 30.4722 | 31.429  | 31.1974 | 30.353  | 31.2548 | 31.1706 | 31.3496 | 31.1972 | 31.5077 | 31.3329 | 31.2235 | 31.8928 | P50395;P50395-2   | P50395;P50395-2  | Rab GDP dissociat   | GDI2                |                   |                     |                   |       |
|     | 23.7218 | 23.8306 | 23.6784 | 24.3199 | 23.8846 | 23.969  | NaN     | NaN     | NaN     |         |         | 24.1146 | NaN               |                  | NaN                 | O14893;O14893-2     | O14893;O14893-2   | Gem-associated p    | GEMIN2            |       |
|     | 28.2046 | 26.3453 | 27.159  | 28.296  | 26.7216 | 27.2838 | 25.7995 | 25.9602 | 26.0898 | 27.4721 | 27.073  | 26.0954 | P57678;I3L2C7;I3I | P57678;I3L2C7    | Gem-associated p    | GEMIN4              |                   |                     |                   |       |
|     | 28.3383 | 26.6759 | 27.2447 | 28.0842 | 26.9548 | 27.2734 | 26.6786 | 26.6741 | 27.0683 | 27.5726 | 27.3527 | 27.3583 | Q8TEQ6            | Q8TEQ6           | Gem-associated p    | GEMIN5              |                   |                     |                   |       |
|     | 24.821  | 24.5527 | 24.1071 | 24.5442 | 24.0623 | 24.1793 | NaN     | NaN     | NaN     | 23.8881 | NaN     | NaN     |                   | NaN              |                     | Q8WXD5;B9A037;Q     | 8WXD5             | Gem-associated p    | GEMIN6            |       |
|     | 23.1208 | NaN     | NaN     | 22.9876 | NaN     | NaN     | NaN     | NaN     | NaN     |         | NaN     | NaN     |                   | NaN              |                     | Q9NWXZ8;H7BYE2      | Q9NWXZ8;H7BYE2    | Gem-associated p    | GEMIN8            |       |
|     | 25.1792 | 24.1217 | 24.8604 | 24.9846 | 24.4482 | 24.8597 | 24.2055 | NaN     | 24.9985 | 25.3701 | 25.4704 | 24.909  | Q7L5D6;Q7L5D6-    | Q7L5D6;Q7L5D6-   | Golgi to ER traffic | GET4                |                   |                     |                   |       |
|     | 26.0364 | 25.3438 | 24.856  | 25.2332 | 25.0161 | 24.8881 | 24.4827 | NaN     | 24.474  | 25.0316 | 25.6438 | 27.2646 | Q96RP9;Q96RP9-    | Q96RP9;Q96RP9-   | Elongation factor   | GFM1                |                   |                     |                   |       |
| NaN |         | NaN     | NaN     |         | NaN     |         | NaN     |         | NaN     |         | 27.9688 | NaN     |                   |                  |                     | Q969S9;Q969S9-5     | Q969S9;Q969S9-5   | Ribosome-releasir   | GFM2              |       |
|     | 30.3321 | 29.601  | 29.7877 | 30.2312 | 29.7872 | 29.774  | 29.3897 | 29.5124 | 29.4325 | 29.6137 | 29.8012 | 29.4118 | Q06210;Q06210-    | Q06210;Q06210-   | Glutamine--fructo   | GFPT1               |                   |                     |                   |       |
|     | 28.1802 | 27.734  | 27.9078 | 28.1577 | 27.9074 | 28.0666 | 28.3772 | 27.8713 | 28.5086 | 28.1504 | 28.1366 | 28.2676 | O94808;E5RJ4      | O94808           | Glutamine--fructo   | GFPT2               |                   |                     |                   |       |
|     | 22.7362 | 23.681  | 23.8008 | 22.8737 | 23.8463 | 23.2748 | NaN     | NaN     | NaN     |         |         | 23.2272 | 23.1616           | NaN              |                     | Q9UIJY5;Q9UIJY5-2   | Q9UIJY5;Q9UIJY5-2 | ADP-ribosylation f  | GGA1              |       |
| NaN |         | NaN     |         |         | 20.7812 | NaN               | NaN              |                     | Q9UIJY4             | Q9UIJY4           | ADP-ribosylation f  | GGA2              |       |
|     | 24.2056 | 24.1223 | 23.821  | 24.0777 | 23.6758 | 23.8277 | 23.273  | NaN     | 23.9873 | 23.9175 | 23.3441 | 23.587  | O75223;M0QZK8;    | O75223;M0QZK8;   | Gamma-glutamyl      | GGCT                |                   |                     |                   |       |
|     | 22.398  | 24.5218 | 22.8304 | 21.8222 | 24.0764 | 23.0796 | 26.7972 | 26.6509 | 24.18   | 23.2643 | NaN     | 24.7689 | Q92820            | Q92820           | Gamma-glutamyl      | GGH                 |                   |                     |                   |       |
| NaN |         | NaN     | NaN     | NaN     |         | NaN     |         | NaN     |         | NaN     | NaN     |         |                   |                  |                     | 21.6346             | O95749;C9J6G3;C   | O95749;C9J6G3;C     | Geranylgeranyl py | GGPS1 |
|     | 25.5156 | 26.0535 | 25.8589 | 25.6472 | 25.8738 | 25.8207 | NaN     | NaN     | 24.564  | NaN     | 24.7824 | 25.0511 | P19440;E7ET76;P;  | P19440;E7ET76;P; | Gamma-glutamyl      | GGT1                |                   |                     |                   |       |
|     | 26.214  | 26.9388 | 27.636  | 26.947  | 27.0375 | 28.0209 | 26.1145 | 26.0386 | 26.6903 | 26.9095 | 26.8046 | 26.607  | P36269;P36269-2   | P36269;P36269-2  | Gamma-glutamyl      | GGT5                |                   |                     |                   |       |
|     | 23.3204 | 22.6069 | 23.0224 | 23.4907 | 22.8297 | 22.8682 | 23.5043 | NaN     | NaN     | 23.5503 | 23.3327 | NaN     |                   | NaN              |                     | Q8N2G8;Q8N2G8       | Q8N2G8;Q8N2G8     | GH3 domain-cont     | GHDC              |       |
|     | 24.2875 | 24.5281 | 24.398  | 24.5987 | 24.5579 | 24.4849 | 24.0831 | NaN     | NaN     | 24.5431 | 24.2716 | 24.4136 | Q9NWXU2           | Q9NWXU2          | Glucose-induced     | c GID8              |                   |                     |                   |       |
| NaN |         | NaN     |         | 22.4855 | 22.18   | NaN     |         | NaN     | NaN     | NaN     | NaN     | NaN     |                   | NaN              |                     | Q6Y7W6;Q6Y7WE       | Q6Y7W6;Q6Y7WE     | PERQ amino acid-    | GIGYF2            |       |
| NaN |         | NaN     |         | NaN     | 20.4498 | Q14691            | Q14691           | DNA replication     | α GINS1             |                   |                     |                   |       |
| NaN |         | NaN     |         | NaN     | 22.1287 | Q9BRX5;Q9BRX5-    | Q9BRX5;Q9BRX5-   | DNA replication     | α GINS3             |                   |                     |                   |       |
|     | 23.3744 | 24.6954 | 23.9718 | 22.8573 | 23.7805 | NaN     | NaN     | NaN     | NaN     |         |         | 24.5356 | 24.616            | 24.5412          | Q9BRT9;E5RFF9       | Q9BRT9;E5RFF9       | DNA replication   | α GINS4             |                   |       |
|     | 27.6952 | 27.9949 | 27.8886 | 27.8631 | 27.8942 | 27.8848 | 27.9333 | 27.4477 | 28.0731 | 28.7593 | 28.2434 | 28.0757 | O14908;O14908-2   | O14908;O14908-2  | PDZ domain-cont     | GIPC1               |                   |                     |                   |       |
|     | 23.5904 | 24.1792 | 23.8759 | 23.0429 | 24.1419 | NaN     | 23.6084 | NaN     | 23.7753 | 23.6841 | NaN     | 23.3657 | Q9Y2X7;Q9Y2X7-    | Q9Y2X7;Q9Y2X7-   | ARF GTPase-activ    | GIT1                |                   |                     |                   |       |
|     | 21.619  | NaN     |         | NaN     |         | NaN     |         | NaN     | NaN     |         | NaN     | NaN     |                   | NaN              |                     | Q14161;R4GNG3;Q     | 14161;R4GNG3;Q    | ARF GTPase-activ    | GIT2              |       |
|     | 22.5328 | NaN     | 22.2208 | NaN     | NaN     | NaN     | 24.6138 | 22.7135 | NaN     | 23.564  | 23.7082 | NaN     |                   | NaN              |                     | P06280;V9GYN5       | P06280            | Alpha-galactosida   | GLA               |       |
|     | 24.4823 | 23.9277 | 23.8964 | 23.967  | 23.7328 | 23.4423 | 25.1793 | 24.9126 | 25.1157 | 25.5194 | 25.3418 | 24.6682 | P16278;E7EQ29;P   | P16278;E7EQ29;P  | Beta-galactosidas   | GLB1                |                   |                     |                   |       |
|     | 26.554  | 26.1536 | 26.0917 | 25.9258 | 25.866  | 26.5057 | 28.4965 | 26.7074 | 25.8634 | 27.1365 | 25.7584 | 27.082  | Q92896;Q92896-    | Q92896;Q92896-   | Golgi apparatus     | p GLG1              |                   |                     |                   |       |
| NaN |         | NaN     |         | NaN     |         | NaN     |         | NaN     |         | 30.1739 | NaN     |         |                   | NaN              |                     | P10070;P10070-1     | P10070;P10070-1   | Zinc finger protein | GLI2              |       |
|     | 24.73   | 25.482  | 25.6385 | 25.8982 | 25.4279 | 25.7644 | 25.4159 | 25.2246 | 26.3589 | 26.0447 | 25.3774 | 26.1744 | P48060;B4E355;f   | P48060           | Gloma pathogen      | GLIPR1              |                   |                     |                   |       |
|     | 25.4788 | 26.5557 | 26.7102 | 26.0213 | 26.3347 | 26.5151 | 26.4226 | 25.7999 | 26.4321 | 26.7351 | 26.2628 | 26.6827 | Q9H4G4;Q5VZR0;    | Q9H4G4;Q5VZR0    | Golgi-associated    | f GLIPR2            |                   |                     |                   |       |
|     | 26.3948 | 25.2197 | 25.3763 | 26.0781 | 25.3151 | 25.4672 | 24.9426 | 25.4264 | 25.1933 | 25.5559 | 25.4998 | 25.4393 | Q92990;Q92990-    | Q92990;Q92990-   | Glomulin            | GLMN                |                   |                     |                   |       |
|     | 28.781  | 29.7069 | 29.1836 | 28.5237 | 29.2859 | 28.9964 |         |         |         |         |         |         |                   |                  |                     |                     |                   |                     |                   |       |



|         |         |         |         |         |         |         |         |         |         |         |         |                   |                   |                    |             |
|---------|---------|---------|---------|---------|---------|---------|---------|---------|---------|---------|---------|-------------------|-------------------|--------------------|-------------|
| 27.0813 | 27.2829 | 27.1518 | 26.6795 | 26.7728 | 26.8939 | 27.0413 | 26.6271 | 26.8431 | 26.714  | 27.016  | 27.9008 | Q9HC38-2;Q9HC3    | Q9HC38-2;Q9HC3    | Glyoxalase domai   | GLOD4       |
| 26.3088 | 24.5988 | NaN     | 25.2142 | 24.9689 | NaN     | 25.6258 | NaN     | NaN     | 25.3569 | 24.4054 | NaN     | P35754            | P35754            | Glutaredoxin-1     | GLRX        |
| 26.4633 | 26.2135 | 26.5059 | 26.527  | 25.769  | 26.2002 | 26.8463 | NaN     | 25.0099 | 26.8382 | 25.8329 | 25.6037 | O76003            | O76003            | Glutaredoxin-3     | GLRX3       |
| 22.645  | NaN     | 22.4268 | 22.457  | 22.4268 | NaN     | Q865X6            | Q865X6            | Glutaredoxin-rela  | GLRX5       |
| 27.3754 | 26.5067 | 26.1811 | 26.8962 | 26.2575 | 26.0732 | 24.7346 | 25.1294 | 25.9833 | 25.6491 | 25.4984 | 24.6945 | O94925-3;O94925   | O94925-3;O94925   | Glutaminase kidn   | GLS         |
| 22.4731 | 21.6735 | 21.8749 | 22.0416 | 21.7846 | NaN     | NaN     | NaN     | NaN     | 23.1589 | 22.6844 | NaN     | Q68CQ7;C9J880;C   | Q68CQ7;C9J880;C   | Glycosyltransfera  | GLTBD1      |
| 28.0734 | 29.0235 | 28.3773 | 28.4022 | 29.0738 | 28.4057 | 27.9918 | 29.3809 | 29.6554 | 27.3405 | 27.93   | 28.4819 | P00367;P00367-3   | P00367;P00367-3   | Glutamate dehydi   | GLUD1;GLUD2 |
| 22.4821 | NaN     | NaN     | 22.6129 | NaN     | Q49A26;K7EMMM8    | Q49A26;K7EMMM8    | Putative oxidored  | GLYR1       |
| NaN     | NaN     | NaN     | NaN     | NaN     | NaN     | 24.3964 | NaN     | NaN     | NaN     | NaN     | NaN     | P17900            | P17900            | Ganglioside GM2    | GM2A        |
| 27.327  | 26.2689 | 26.5319 | 27.0192 | 26.2563 | 26.4473 | 26.7079 | 25.8862 | 26.0448 | 27.7314 | 27.6313 | 26.7283 | O60547;O60547-2   | O60547;O60547-2   | GDP-mannose 4,6    | GMD5        |
| 27.4305 | 27.6695 | 27.8558 | 27.3079 | 27.3467 | 27.7676 | 28.3158 | 27.2082 | 27.1611 | 28.2577 | 27.6617 | 27.8381 | P60983;G3V4P8     | P60983;G3V4P8     | Glia maturation fa | GMFB        |
| 24.8915 | 25.2007 | 24.8897 | 24.1348 | 24.9374 | 25.0626 | 24.9956 | 24.7498 | 24.5872 | 25.0572 | 24.7406 | 25.1519 | O60234;M0R0C1;    | O60234;M0R0C1;    | Glia maturation fa | GMFG        |
| 27.6852 | 26.5862 | 26.6387 | 26.9994 | 26.7866 | 26.447  | 26.5902 | 26.3457 | 26.358  | 27.3198 | 27.4492 | 26.5574 | Q96IJ6;Q96IJ6-2;A | Q96IJ6;Q96IJ6-2;A | Mannose-1-phosp    | GMPPA       |
| 26.3809 | 25.079  | 25.2152 | 25.2909 | 25.1491 | 24.8472 | 25.67   | 25.813  | 25.9458 | 26.3993 | 26.6883 | 26.4739 | Q9Y5P6;Q9Y5P6-2   | Q9Y5P6;Q9Y5P6-2   | Mannose-1-phosp    | GMPPB       |
| 25.946  | 26.2375 | 25.6963 | 24.9944 | 25.9059 | 25.329  | 25.9975 | 24.6818 | 24.9632 | 25.7987 | 25.5554 | 25.237  | Q9P2T1;H0YMB3;    | Q9P2T1;H0YMB3;    | GMP reductase 2;   | GMPR2       |
| 28.2688 | 27.7948 | 27.5664 | 27.7626 | 28.0404 | 27.9126 | 27.2744 | 27.7806 | 28.0387 | 28.5643 | 28.688  | 28.5368 | P49915;P49915-2   | P49915;P49915-2   | GMP synthase [gl   | GMPS        |
| 29.5254 | 29.2169 | 30.0794 | 29.664  | 29.3613 | 30.1482 | 29.7563 | 29.0349 | 29.4329 | 30.5963 | 30.0797 | 29.7601 | P29992;K7EL62;A   | P29992            | Guanine nucleotic  | GNA11       |
| 22.8357 | NaN     | 23.2985 | 22.6742 | 23.209  | 23.6516 | NaN     | NaN     | NaN     | 23.9065 | 23.3049 | NaN     | Q03113;Q03113-2   | Q03113;Q03113-2   | Guanine nucleotic  | GNA12       |
| 28.985  | 28.9881 | 29.4189 | 28.9557 | 29.099  | 29.7866 | 28.5282 | 27.106  | 28.1267 | 29.261  | 28.8011 | 28.6602 | Q14344;Q14344-2   | Q14344;Q14344-2   | Guanine nucleotic  | GNA13       |
| 24.9355 | 25.6395 | 25.8521 | 25.3026 | 25.6414 | NaN     | 24.9057 | NaN     | NaN     | NaN     | NaN     | 24.8099 | O95837            | O95837            | Guanine nucleotic  | GNA14       |
| 25.59   | 25.3918 | 26.4062 | 25.4875 | 25.4864 | 26.574  | 25.4389 | 25.3516 | 26.0365 | 26.1002 | 26.1444 | 25.8704 | P30679            | P30679            | Guanine nucleotic  | GNA15       |
| 26.0359 | 25.293  | 25.7752 | 25.7316 | 24.9816 | 25.6776 | 25.6214 | NaN     | NaN     | 26.1368 | 25.0789 | 25.6963 | P63096;P63096-2   | P63096;P63096-2   | Guanine nucleotic  | GNAI1       |
| 31.8801 | 31.683  | 32.0691 | 31.7571 | 31.548  | 32.3106 | 31.7931 | 31.3159 | 31.7133 | 32.0961 | 31.7489 | 31.9169 | P04899;P04899-4   | P04899;P04899-4   | Guanine nucleotic  | GNAI2       |
| 29.9916 | 29.7761 | 30.4634 | 29.8339 | 29.5115 | 30.4794 | 30.0229 | 29.4882 | 30.0457 | 30.3935 | 30.012  | 30.372  | P08754;P19087     | P08754            | Guanine nucleotic  | GNAI3       |
| 27.047  | 26.3923 | 26.9103 | 26.9935 | 26.267  | 27.1765 | 26.1108 | 23.7843 | 25.6547 | 26.8932 | 26.1777 | 25.9939 | P50148;B1AM21     | P50148            | Guanine nucleotic  | GNAQ        |
| 25.9819 | NaN     | 26.4231 | 26.161  | 26.5235 | 27.022  | 26.7115 | NaN     | 26.3339 | 27.4436 | 26.7872 | 26.4327 | P63092;P63092-4   | P63092;P63092-4   | Guanine nucleotic  | GNAS        |
| 23.6327 | NaN     | 24.772  | NaN     | 23.5563 | NaN     | P63092-2          | P63092-2          | Guanine nucleotic  | GNAS        |
| 29.9523 | 29.8043 | 30.4926 | 30.2472 | 29.5847 | 30.6096 | 29.9688 | 29.3949 | 29.5504 | 30.6964 | 30.4335 | 30.158  | P63092-3;H0Y7F4   | P63092-3          | Guanine nucleotic  | GNAS        |
| 31.5976 | 32.2172 | 31.9204 | 31.8588 | 31.7707 | 31.8953 | 31.9343 | 31.7814 | 31.6296 | 32.1372 | 31.8849 | 31.7911 | P62873;P62873-2   | P62873;P62873-2   | Guanine nucleotic  | GNB1        |
| NaN     | NaN     | NaN     | 22.3785 | NaN     | NaN     | NaN     | NaN     | NaN     | 23.2363 | NaN     | NaN     | Q9BYB4;Q9BYB4-2   | Q9BYB4;Q9BYB4-2   | Guanine nucleotic  | GNB1L       |
| 29.1604 | 29.3916 | 28.8102 | 29.2883 | 28.7222 | 29.1003 | 28.9867 | 28.3996 | 28.2491 | 29.2878 | 28.9589 | 28.9794 | P62879;C9JXA5;C   | P62879;C9JXA5;C   | Guanine nucleotic  | GNB2        |
| 31.7893 | 30.4724 | 30.4013 | 31.2115 | 30.4082 | 30.3168 | 30.0173 | 30.507  | 29.8728 | 31.1334 | 31.2519 | 30.2608 | P63244;J3KPE3;D   | P63244;J3KPE3;D   | Guanine nucleotic  | GNB2L1      |
| 27.6361 | 29.0464 | 28.4934 | 28.2664 | 28.9114 | 28.8174 | 27.0151 | 27.6149 | 27.2578 | 27.1041 | 28.0053 | 28.1514 | Q9HAV0;C9JD14;J   | Q9HAV0            | Guanine nucleotic  | GNB4        |
| 27.8565 | 26.509  | 26.7178 | 27.3247 | 26.6428 | 26.6784 | 26.7773 | 25.6145 | 26.0927 | 27.272  | 26.6291 | 26.5969 | Q9Y223;Q9Y223-2   | Q9Y223;Q9Y223-2   | Bifunctional UDP-  | GNE         |
| 24.818  | 25.3025 | 25.4398 | 24.4043 | 24.2978 | 24.6331 | 23.8842 | NaN     | 24.6958 | 24.2694 | NaN     | 24.3954 | P50151;Q9H1X3-2   | P50151            | Guanine nucleotic  | GNG10       |
| 31.4237 | 30.7418 | 31.0779 | 31.2283 | 30.7697 | 31.218  | 30.997  | 29.8729 | 30.2652 | 31.2808 | 30.5196 | 30.3645 | Q9UBI6            | Q9UBI6            | Guanine nucleotic  | GNG12       |
| 29.3652 | 29.0672 | 29.6994 | 29.0173 | 28.7439 | 29.6694 | 28.7762 | 27.5904 | 28.6648 | 29.2055 | 28.5276 | 28.6602 | P63218            | P63218            | Guanine nucleotic  | GNG5        |
| 25.2995 | 24.5253 | 24.2799 | 24.2537 | 24.4105 | 24.3301 | 23.9332 | NaN     | 24.5404 | 23.9977 | 23.9781 | 23.6935 | P36915;P36915-2   | P36915;P36915-2   | Guanine nucleotic  | GNL1        |
| 24.7027 | 23.6396 | 24.4074 | 25.7532 | 24.1469 | 24.6293 | NaN     | NaN     | NaN     | 23.8475 | 23.9722 | 22.0728 | Q13823;H0YG10     | Q13823            | Nucleolar GTP-bin  | GNL2        |
| 25.6874 | 24.8089 | 25.3424 | 26.7186 | 25.569  | 25.5936 | NaN     | NaN     | NaN     | 25.0506 | 25.4037 | 23.9841 | Q9BVP2;Q9BVP2-    | Q9BVP2;Q9BVP2-    | Guanine nucleotic  | GNL3        |
| 23.5    | NaN     | 23.0028 | 23.9454 | 23.1975 | NaN     | NaN     | NaN     | NaN     | 22.4361 | 23.0642 | NaN     | Q9NVN8            | Q9NVN8            | Guanine nucleotic  | GNL3L       |
| 26.8848 | 27.7019 | 27.2445 | 26.6602 | 27.3252 | 27.0216 | 27.5929 | 27.149  | 26.519  | 27.2123 | 27.0685 | 27.0708 | P46926;D6RAY7;C   | P46926;D6RAY7;C   | Glucosamine-6-ph   | GNPDA1      |
| 25.3122 | 25.553  | 25.6196 | 24.9066 | 25.3016 | 25.0586 | 25.0481 | 24.9148 | 25.4969 | 24.8881 | 24.8034 | 25.7294 | Q96EK6;G3V4W4;    | Q96EK6;G3V4W4;    | Glucosamine 6-ph   | GNPNAT1     |
| 24.1521 | 24.8388 | 24.4079 | 24.1569 | 24.541  | 24.5533 | 26.0288 | 26.2633 | 25.4124 | 23.9629 | 23.6802 | 24.1717 | P15586;H7C3P4;F   | P15586;H7C3P4;F   | N-acetylglucosam   | GNS         |
| 24.6836 | 23.6701 | 24.3155 | 24.8929 | 23.9615 | 24.0912 | 23.3229 | 23.9179 | NaN     | 23.422  | NaN     | NaN     | Q08379;A0A0C4D    | Q08379;A0A0C4D    | Golgin subfamily   | GOLGA2      |
| 25.0131 | 25.4908 | 24.6235 | 24.318  | 25.1036 | 24.3604 | 24.5659 | NaN     | NaN     | 24.5543 | 24.8769 | NaN     | Q08378;Q08378-2   | Q08378;Q08378-2   | Golgin subfamily   | GOLGA3      |
| 24.4422 | 24.5097 | 23.6409 | 24.2281 | NaN     | Q13439;Q13439-2   | Q13439;Q13439-2   | Golgin subfamily   | GOLGA4      |
| 21.42   | NaN     | Q8TBA6;Q8TBA6-    | Q8TBA6;Q8TBA6-    | Golgin subfamily   | GOLGA5      |
| 27.4437 | 27.371  | 27.8109 | 27.045  | 27.0114 | 27.2857 | 27.7054 | 26.882  | 27.927  | 27.6834 | 26.8957 | 27.649  | Q7Z5G4;Q7Z5G4-    | Q7Z5G4;Q7Z5G4-    | Golgin subfamily   | GOLGA7      |
| NaN     | NaN     | NaN     | NaN     | 23.7768 | NaN     | Q2TAP0;M0R0R5     | Q2TAP0;M0R0R5     | Golgin subfamily   | GOLGA7B     |
| 24.12   | 24.1971 | 24.3693 | 23.5416 | 23.3076 | 24.8149 | NaN     | NaN     | NaN     | 23.1159 | NaN     | NaN     | Q14789;Q14789-2   | Q14789;Q14789-2   | Golgin subfamily   | GOLGB1      |
| 28.1161 | 27.8327 | 28.1969 | 28.0989 | 27.4835 | 27.9855 | 28.965  | 29.6789 | 30.627  | 27.8728 | NaN     | 25.8209 | O00461;F8W785     | O00461;F8W785     | Golgi integral mer | GOLIM4      |
| 24.4759 | 24.1845 | 24.3769 | 24.0671 | 24.5123 | NaN     | 26.5136 | 25.9515 | 25.4109 | 24.8885 | 24.3975 | 25.0204 | Q8NBJ4;Q8NBJ4-2   | Q8NBJ4;Q8NBJ4-2   | Golgi membrane     | GOLM1       |
| 23.1168 | 23.5467 | 23.7996 | 23.0275 | 23.0569 | 23.1331 | 24.3669 | 23.0118 | NaN     | 23.3538 | 23.0917 | 22.3332 | Q9H4A6            | Q9H4A6            | Golgi phosphopro   | GOLPH3      |
| 25.1674 | 24.0989 | 24.7654 | 25.378  | 24.2805 | 24.504  | NaN     | NaN     | NaN     | 24.7816 | 23.8186 | NaN     | Q9Y3E0;G3V1U5;I   | Q9Y3E0;G3V1U5;I   | Vesicle transport  | GOLT1B      |
| 24.9474 | 24.3044 | 24.5701 | 24.9114 | 24.2021 | 24.7323 | 23.85   | NaN     | NaN     | 24.314  | 24.2726 | NaN     | Q9HD26;Q9HD26     | Q9HD26;Q9HD26     | Golgi-associated F | GOPC        |
| NaN     | NaN     | NaN     | 22.9521 | NaN     | Q9BQQ3;H7C0J2;    | Q9BQQ3;H7C0J2;    | Golgi reassembly-  | GORASP1     |
| 26.2664 | 26.0588 | 25.7668 | 25.9363 | 25.2313 | 25.1388 | 25.523  | NaN     | 24.0769 | 25.5803 | 24.5022 | 24.5567 | Q9H8Y8;Q9H8Y8-    | Q9H8Y8;Q9H8Y8-    | Golgi reassembly-  | GORASP2     |
| 24.8737 | 25.3932 | 24.5973 | 24.4953 | 25.006  | 24.6554 | 25.3943 | NaN     | NaN     | 24.368  | 24.601  | NaN     | E9PCW1;O9S249;    | E9PCW1;O9S249;    | Golgi SNAP recept  | GOSR1       |
| 28.6271 | 29.7379 | 29.075  | 28.2071 | 29.4002 | 29.0629 | 29.2662 | 29.2748 | 29.2239 | 28.9228 | 28.9536 | 29.3718 | P17174;P17174-2   | P17174;P17174-2   | Aspartate aminot   | GOT1        |



|     |         |         |         |         |         |         |         |         |         |         |         |         |                 |                 |                     |                 |
|-----|---------|---------|---------|---------|---------|---------|---------|---------|---------|---------|---------|---------|-----------------|-----------------|---------------------|-----------------|
|     | 27.7933 | 29.4242 | 28.558  | 27.8997 | 29.254  | 28.4505 | 28.6632 | 29.8057 | 30.3029 | 28.7035 | 29.3802 | 29.6064 | P00505;P00505-2 | P00505;P00505-2 | Aspartate aminot    | GOT2            |
|     | 22.5145 | NaN     | 22.5403 | 22.8988 | NaN     | NaN     | NaN     | NaN     | NaN     | 22.5592 | 22.4722 | NaN     | O43292;O43292-2 | O43292;O43292-2 | Glycosylphosphat    | GPAA1           |
| NaN | NaN     | NaN     | NaN     | NaN     | NaN     | NaN     | NaN     | NaN     | NaN     | 20.0542 | NaN     | NaN     | Q8N954;A0A0A0M  | Q8N954;A0A0A0M  | G patch domain-c    | GPATCH11        |
|     | 23.0137 | 23.2474 | 24.7813 | 22.4231 | 23.2775 | 22.6095 | 28.8965 | 27.3458 | 25.5447 | 25.6699 | 26.0685 | 24.3694 | P35052;H7C410;H | P35052;H7C410;H | Glypican-1;Secret   | GPC1            |
| NaN | NaN     | NaN     | 22.2943 | NaN     | NaN     | NaN     | 23.7535 | NaN     | NaN     | NaN     | NaN     | NaN     | Q9Y625;A0A087M  | Q9Y625          | Glypican-6;Secret   | GPC6            |
| NaN | NaN     | NaN     | 21.9938 | 22.2469 | NaN     | NaN     | NaN     | NaN     | NaN     | 22.7913 | 22.3632 | 23.2404 | Q8N335;C9JFA7;C | Q8N335;C9JFA7;C | Glycerol-3-phosph   | GPDL1           |
|     | 23.4574 | 24.2821 | 24.2568 | 23.9881 | 24.272  | 24.2299 | 23.5486 | 24.456  | 25.3886 | NaN     | 23.3964 | NaN     | P43304;P43304-2 | P43304;P43304-2 | Glycerol-3-phosph   | GPDL2           |
|     | 25.2541 | 25.5177 | 25.2622 | 25.2165 | 25.37   | 24.9851 | 25.5799 | 25.6637 | 25.3841 | 24.74   | 25.4503 | 25.7605 | Q9NQX3;Q9NQX3   | Q9NQX3;Q9NQX3   | Gephyrin;Molybdi    | GPHN            |
|     | 30.939  | 31.3853 | 31.267  | 30.674  | 31.259  | 31.2453 | 31.5385 | 31.4837 | 31.5644 | 31.2982 | 31.3971 | 31.6647 | P06744;A0A0A0M  | P06744;A0A0A0M  | Glucose-6-phosph    | GPI             |
| NaN | NaN     | NaN     | NaN     | NaN     | 22.8208 | NaN     | NaN     | NaN     | NaN     | NaN     | NaN     | 23.734  | Q92917          | Q92917          | G patch domain a    | GPLOW           |
| NaN | NaN     | NaN     | 22.9843 | NaN     | Q9HCN4;Q9HCN4   | Q9HCN4;Q9HCN4   | GPN-loop            | GPase           |
|     | 23.3276 | NaN     | 22.948  | NaN     | Q9UHW5;Q9UHW    | Q9UHW5;Q9UHW    | GPN-loop            | GPase           |
|     | 24.2107 | 24.7323 | 24.3248 | 24.0388 | 24.658  | 24.471  | NaN     | NaN     | NaN     | 24.1438 | 23.7291 | NaN     | Q5VW38;Q5VW3    | Q5VW38;Q5VW3    | Protein GPR107      | GPR107          |
|     | 23.1957 | 23.4625 | 23.7311 | 23.1496 | 23.183  | NaN     | 24.0485 | NaN     | 23.7551 | 23.5807 | 23.3639 | NaN     | Q865Q4;Q865Q4   | Q865Q4;Q865Q4   | G-protein couple    | GPRL26          |
| NaN | NaN     | NaN     | NaN     | NaN     | NaN     | NaN     | NaN     | 22.0547 | NaN     | NaN     | NaN     | NaN     | Q86V85          | Q86V85          | Integral membran    | GPRL80          |
| NaN | NaN     | NaN     | 21.8453 | NaN     | Q43194          | Q43194          | G-protein couple    | GPRL39          |
|     | 22.8996 | 24.6547 | 23.8633 | 22.9661 | 24.4333 | 22.2352 | 26.4304 | 25.7982 | 26.2344 | 26.2405 | 25.2427 | 25.7081 | Q9Y653;Q9Y653-2 | Q9Y653;Q9Y653-2 | G-protein couple    | GPRL56;ADGRG1   |
|     | 25.9018 | 24.0315 | 24.5452 | 24.5811 | NaN     | 23.7446 | NaN     | NaN     | 23.6256 | NaN     | NaN     | NaN     | Q8NFJ5;F5GWW3   | Q8NFJ5          | Retinoic acid-indu  | GPRLC5A         |
| NaN |         | 22.6744 | 23.0436 | NaN     | 22.6837 | 23.3899 | NaN     | NaN     | NaN     | NaN     | NaN     | NaN     | Q9NQ84;A8MXZ4   | Q9NQ84;A8MXZ4   | G-protein couple    | GPRLC5C         |
|     | 25.2079 | 26.3896 | 26.1301 | 25.3713 | 25.7698 | 26.1215 | 25.8301 | NaN     | NaN     | 26.4152 | 25.9456 | NaN     | Q7Z2K8;Q7Z2K8-2 | Q7Z2K8;Q7Z2K8-2 | G protein-regulat   | GPRLN1          |
|     | 26.5153 | 26.1622 | 26.4538 | 26.309  | 26.3618 | 26.6889 | 26.1063 | 26.3275 | 26.3609 | 26.39   | 26.3536 | 26.6637 | Q13098;C9JFE4;Q | Q13098;C9JFE4;Q | COP9 signalosome    | GPSP1           |
|     | 28.2159 | 28.2914 | 28.3784 | 28.0652 | 27.9945 | 28.2643 | NaN     | NaN     | NaN     | NaN     | NaN     | NaN     | A0A0A0MSK4;Q8I  | A0A0A0MSK4;Q8I  | G-protein-signalin  | GPSPM1          |
|     | 22.5187 | NaN     | 25.181  | 24.3571 | 25.0059 | 25.5937 | 24.9445 | NaN     | NaN     | 24.5114 | 25.4364 | NaN     | P81274;H0Y4A4;C | P81274          | G-protein-signalin  | GPSPM2          |
| NaN | NaN     | NaN     | NaN     | NaN     | 22.1777 | NaN     | Q8TED1;E7ETY7;J | Q8TED1;E7ETY7   | Probable glutathic  | GPX8            |
|     | 26.9489 | 26.8872 | 26.9428 | 26.4718 | 26.3514 | 26.8767 | 26.6603 | 25.8142 | 26.3162 | 26.9842 | 26.5589 | 26.5081 | P62993;P62993-2 | P62993;P62993-2 | Growth factor rec   | GRB2            |
|     | 26.0568 | 25.6246 | 25.7146 | 25.6949 | 25.8768 | 25.9718 | 25.8866 | 25.8078 | 25.9544 | 26.3597 | 26.4447 | 26.0808 | Q9UBQ7;U3KQ56   | Q9UBQ7;U3KQ56   | Glyoxylate reduct   | GRHPR           |
|     | 24.1158 | 23.9399 | 23.6788 | 23.5754 | 23.3314 | NaN     | Q4V328;A0A087M  | Q4V328;A0A087M  | GRIP1-associated    | GRIPAP1         |
|     | 24.3764 | 24.2466 | 24.8611 | 24.5804 | 24.4363 | 24.9843 | 23.988  | NaN     | NaN     | 24.7647 | 24.6569 | 24.5853 | P43250-2;P43250 | P43250-2;P43250 | G protein-couple    | GRK6            |
|     | 21.9533 | 23.3502 | 22.3922 | NaN     | 22.8643 | NaN     | NaN     | 25.2274 | 24.212  | NaN     | NaN     | 22.7527 | P28799;K7EQ05;P | P28799;K7EQ05;P | Granulins;Acrogra   | GRN             |
|     | 26.0187 | 27.2166 | 26.0854 | 26.0191 | 26.7753 | 25.8309 | 26.2098 | 26.5649 | 26.8841 | 26.2927 | 26.325  | 26.41   | Q9HAV7          | Q9HAV7          | GrpE protein hom    | GRPEL1          |
|     | 25.6593 | 25.6802 | 24.1853 | 25.4019 | 25.3374 | NaN     | 24.3703 | NaN     | NaN     | NaN     | NaN     | NaN     | Q12849;H0Y8R1;F | Q12849;H0Y8R1;F | G-rich sequence f   | GRSF1           |
|     | 26.6132 | 24.237  | 24.8655 | 25.397  | 24.3418 | 24.882  | 24.8114 | NaN     | NaN     | 25.5437 | 25.4118 | 25.1243 | Q9BQ67;MQQX71   | Q9BQ67;MQQX71   | Glutamate-rich W    | GRWD1           |
|     | 24.23   | 23.6599 | 24.0451 | 23.9406 | 23.9822 | 24.3108 | NaN     | NaN     | NaN     | 23.6853 | 23.4885 | 24.0776 | P57764;G3V1A6;E | P57764;G3V1A6;E | Gasdermin-D         | GSDMD           |
|     | 25.0733 | 23.7385 | 24.1752 | 24.0174 | 23.4839 | 23.865  | 23.7257 | NaN     | 23.8283 | 24.3175 | 24.1262 | 24.4975 | P49840;A8MT37;I | P49840;A8MT37   | Glycogen synthas    | GSK3A           |
|     | 25.7883 | 24.7356 | 25.3882 | 25.6271 | 24.6178 | 24.8187 | 25.2545 | 24.6059 | 24.9766 | 25.7517 | 25.3213 | NaN     | P49841;P49841-2 | P49841;P49841-2 | Glycogen synthas    | GSK3B           |
|     | 24.3491 | 24.3988 | 24.5337 | 24.2365 | 23.8089 | 24.2217 | 24.4349 | NaN     | NaN     | 23.3697 | 23.6063 | NaN     | P06396;A0A0A0M  | P06396;A0A0A0M  | Gelsolin            | GSN             |
|     | 29.0264 | 28.4826 | 28.489  | 28.7599 | 28.4379 | 28.4901 | 29.123  | 28.4842 | 28.4644 | 28.9683 | 28.8054 | 28.6661 | P15170-3;P15170 | P15170-3;P15170 | Eukaryotic peptid   | GSPT1;GSPT2     |
|     | 26.4375 | 27.3317 | 26.679  | 26.0513 | 27.0133 | 26.6471 | 26.558  | 26.7927 | 26.973  | 26.4637 | 26.8272 | 27.0473 | P00390;P00390-2 | P00390;P00390-2 | Glutathione reduct  | GSR             |
|     | 28.3492 | 29.6272 | 28.8131 | 28.077  | 29.2865 | 28.8739 | 29.3611 | 29.6085 | 29.6192 | 28.7284 | 29.0416 | 29.7848 | P48637;P48637-2 | P48637;P48637-2 | Glutathione synth   | GSS             |
|     | 24.9194 | 25.1798 | 24.8818 | 24.6689 | 24.9453 | 24.7868 | 24.3813 | 24.6779 | 25.1095 | 24.103  | 24.5027 | NaN     | Q9Y2Q3;E9PFN5;I | Q9Y2Q3;E9PFN5;I | Glutathione S-trar  | GSTK1           |
|     | 25.9349 | 24.9674 | 25.2465 | 25.4668 | 24.5239 | 25.2071 | 24.8653 | NaN     | 24.4656 | 25.3604 | 24.997  | 24.8753 | P09488;P09488-2 | P09488;P09488-2 | Glutathione S-trar  | GSTM1;GSTM4     |
|     | 28.2062 | 27.4797 | 27.7157 | 28.1031 | 27.1246 | 27.8334 | 27.1116 | NaN     | 27.5544 | 27.9479 | 27.1276 | 27.2964 | P21266;A0A0A0M  | P21266;A0A0A0M  | Glutathione S-trar  | GSTM3           |
|     | 29.6718 | 30.0725 | 29.3873 | 29.052  | 29.5571 | 29.474  | 30.2009 | 29.5098 | 29.2373 | 29.7191 | 29.7338 | 29.7477 | P78417;Q5TA02;P | P78417;Q5TA02;P | Glutathione S-trar  | GSTO1           |
|     | 29.1891 | 29.6003 | 29.4051 | 29.1782 | 29.198  | 29.3287 | 30.2408 | 29.1637 | 29.3872 | 29.7322 | 29.5866 | 29.4527 | P09211;A8MX94;J | P09211;A8MX94   | Glutathione S-trar  | GSTP1           |
|     | 22.6507 | 23.4401 | 23.4511 | 22.9191 | 23.8935 | 23.6161 | 23.1172 | NaN     | 23.5165 | 22.9747 | 23.1478 | NaN     | POCG30;POCG29;I | POCG30;POCG29;I | Glutathione S-trar  | GSTT2B;GSTT2;Em |
|     | 26.8959 | 26.607  | 26.3579 | 26.3317 | 26.7871 | 26.0483 | 25.5864 | NaN     | 25.9708 | 26.1285 | 26.2913 | 26.236  | G3V5T0;A0A0C4D  | G3V5T0;A0A0C4D  | Maleylacetacetate   | GSTZ1           |
|     | 24.0354 | NaN     | 23.7421 | 23.8789 | 23.6887 | 23.6812 | NaN     | 24.2339 | NaN     | 23.3637 | 23.7032 | 24.2585 | P52655;J3KNC0;P | P52655;J3KNC0;P | Transcription initi | GTFA2A1         |
|     | 25.0814 | 23.9339 | NaN     | 25.3516 | 23.8772 | NaN     | P52657;A8MYR4;I | P52657;A8MYR4;I | Transcription initi | GTFA2A2         |
|     | 22.5161 | NaN     | NaN     | 22.6386 | NaN     | Q00403;B1APE1;E | Q00403;B1APE1;E | Transcription initi | GTFA2B          |
| NaN | NaN     | NaN     | NaN     | 21.6253 | 21.3999 | 21.9174 | NaN     | NaN     | NaN     | NaN     | NaN     | NaN     | P29083;E9PER7;C | P29083;E9PER7;C | General transcript  | GTFA2E1         |
|     | 21.3374 | NaN     | P29084;ESRH41   | P29084          | Transcription initi | GTFA2E2         |
|     | 23.8529 | 23.8625 | 24.1407 | 23.5806 | 24.2551 | 24.2878 | 23.601  | 23.9983 | NaN     | 23.9266 | 24.1787 | 24.7253 | P35269;M0R0Z3;I | P35269;M0R0Z3;I | General transcript  | GTFA2F1         |
|     | 23.5065 | 23.8395 | 23.4777 | 23.4454 | 24.0636 | 23.6403 | NaN     | NaN     | NaN     | NaN     | NaN     | NaN     | P13984          | P13984          | General transcript  | GTFA2F2         |
|     | 22.9624 | NaN     | Q6P1K8;Q13888;I | Q6P1K8;Q13888;I | General transcript  | GTFA2H2;GTFA2H2 |
| NaN | NaN     | NaN     | NaN     | 21.8329 | 22.9    | NaN     | Q13889;F5H6X0;F | Q13889;F5H6X0;F | General transcript  | GTFA2H3         |
|     | 22.5599 | NaN     | Q92759;Q92759-2 | Q92759;Q92759-2 | General transcript  | GTFA2H4         |
| NaN | NaN     | NaN     | NaN     | NaN     | NaN     | NaN     | NaN     | NaN     | NaN     | NaN     | NaN     | NaN     | Q6ZYL4          | Q6ZYL4          | General transcript  | GTFA2H5         |
|     | 25.6731 | 24.6115 | 25.3934 | 25.9038 | 25.1197 | 25.6161 | 23.2594 | 25.6727 | 23.8154 | 26.5233 | 25.8323 | 25.8231 | P78347;P78347-2 | P78347;P78347-2 | General transcript  | GTFA2I          |
|     | 24.0885 | NaN     | 22.748  | 24.0132 | 23.4751 | 22.9545 | NaN     | NaN     | NaN     | 23.0328 | 23.4585 | NaN     | Q9UKN8;F2Z356   | Q9UKN8          | General transcript  | GTFA2C4         |
|     | 24.0352 | NaN     | 23.6458 | 24.1952 | 23.5982 | 23.807  | NaN     | NaN     | NaN     | 24.0703 | 23.9093 | NaN     | Q9Y5Q8;Q9Y5Q8   | Q9Y5Q8;Q9Y5Q8   | General transcript  | GTFA2C5         |



|     |         |         |         |         |         |         |         |         |         |         |         |         |                 |                 |                     |                    |         |
|-----|---------|---------|---------|---------|---------|---------|---------|---------|---------|---------|---------|---------|-----------------|-----------------|---------------------|--------------------|---------|
|     | 25.9862 | 24.4796 | 25.1491 | 25.6217 | 24.7883 | 24.7958 | 24.6675 | 24.5638 | 24.5657 | 24.6014 | 24.7516 | 24.8385 | O00178;B0QY59;f | O00178          | GTP-binding prote   | GTPBP1             |         |
| NaN | 23.8652 | 23.4464 | 23.3936 | 23.7312 | 24.1647 | 23.8866 | NaN     | NaN     | NaN     | NaN     | NaN     | NaN     | A4D1E9;A4D1E9-2 | A4D1E9;A4D1E9-2 | GTP-binding prote   | GTPBP10            |         |
|     |         |         | 22.4814 | NaN     | 22.0263 | NaN     | Q9BX10;Q9BX10-; | Q9BX10;Q9BX10-; | GTP-binding prote   | GTPBP2             |         |
|     | 27.8054 | 26.8427 | 27.7434 | 28.6564 | 27.8021 | 27.771  | 25.7061 | 26.0546 | 25.9535 | 27.7558 | 27.7498 | 27.6052 | Q9BZE4;Q9BZE4-2 | Q9BZE4;Q9BZE4-2 | Nucleolar GTP-bin   | GTPBP4             |         |
| NaN |         | NaN     |         | 22.3602 | NaN     | O43824;H0Y251   | O43824;H0Y251   | Putative GTP-bind   | GTPBP6             |         |
| NaN |         | 22.1839 | 22.2717 | 21.7029 | 23.2144 | NaN     | NaN     | NaN     | NaN     | 21.8207 | 22.8003 | NaN     | Q9NYZ3          | Q9NYZ3          | G2 and S phase-e    | GTSE1              |         |
|     | 25.5131 | 24.4658 | NaN     | 24.7849 | NaN     | Q8N442          | Q8N442          | Translation factor  | GUF1               |         |
|     | 23.5581 | 24.4898 | 23.7242 | 23.6291 | 24.281  | 23.8201 | 23.897  | NaN     | 24.0623 | 23.73   | 23.7547 | 24.5858 | Q16774;B1ANH5;f | Q16774;B1ANH5;f | Guanylate kinase    | GUK1               |         |
| NaN | NaN     | NaN     | 21.7233 | NaN     | 22.0117 | NaN     | Q9UBP9;Q9UBP9-  | Q9UBP9;Q9UBP9-  | PTB domain-cont     | GULP1              |         |
| NaN | NaN     | NaN     | NaN     | NaN     | NaN     | NaN     | 23.5    | NaN     | NaN     | NaN     | NaN     | NaN     | P08236;P08236-3 | P08236;P08236-3 | Beta-glucuronidas   | GUSB               |         |
|     | 24.4081 | 24.7626 | 24.1804 | 23.7219 | 24.7515 | 24.0817 | 24.4332 | 25.1343 | 24.6663 | 24.122  | 24.4449 | 24.5942 | P46976;P46976-2 | P46976;P46976-2 | Glycogenin-1        | GYG1               |         |
|     | 25.927  | 24.6945 | 25.0353 | 25.8492 | 24.4561 | 24.8523 | 23.1576 | 25.0261 | 25.2225 | 25.1061 | 25.0825 | 25.1014 | P13807;P13807-2 | P13807;P13807-2 | Glycogen [starch]   | GYS1               |         |
|     | 26.0336 | 26.3427 | 26.1767 | 27.7761 | 26.5896 | 26.4071 | 27.2233 | NaN     | NaN     | 26.3057 | 27.5107 | 26.4822 | P07305;P07305-2 | P07305;P07305-2 | Histone H1.0;Hist   | H1F0               |         |
|     | 24.0219 | 23.8419 | 23.7874 | 26.2091 | 23.7318 | 23.4335 | 23.3141 | NaN     | NaN     | 23.8319 | 26.0298 | NaN     | Q92522          | Q92522          | Histone H1x         | H1FX               |         |
|     | 27.1824 | 27.5201 | 26.6839 | 28.3549 | 27.1349 | 26.8449 | 27.5448 | 26.5831 | 24.8844 | 26.8451 | 26.7003 | 26.0352 | Q71UI9;P0C055;C | Q71UI9;P0C055;C | Histone H2A.V;His   | H2AFV;H2AFZ        |         |
| NaN | NaN     | NaN     | NaN     | NaN     | NaN     | NaN     | NaN     | NaN     | NaN     | NaN     | 23.4109 | NaN     | P16104          | P16104          | Histone H2AX        | H2AFX              |         |
|     | 25.8493 | 25.5563 | 25.4043 | 26.6734 | 25.583  | 25.1374 | 27.1643 | 24.4822 | NaN     | 25.9098 | 27.1891 | 26.9527 | O75367;O75367-2 | O75367;O75367-2 | Core histone mac    | H2AFY              |         |
| NaN | NaN     | NaN     | NaN     | NaN     | NaN     | NaN     | NaN     | NaN     | 22.8109 | NaN     | NaN     | NaN     | O95479;R4GMU1   | O95479;R4GMU1   | GDH/6PGL endop      | H6PD               |         |
| NaN | NaN     | NaN     | NaN     | NaN     | NaN     | NaN     | NaN     | NaN     | NaN     | NaN     | 23.5636 | NaN     | Q6Y1H2          | Q6Y1H2          | Very-long-chain (3  | HACD2              |         |
|     | 24.8251 | 24.4324 | 24.8244 | 25.0549 | 24.815  | 25.1522 | 25.1912 | 25.2804 | 25.6923 | 25.419  | 24.9548 | 24.5933 | Q9P035;H3B572;f | Q9P035;H3B572;f | Very-long-chain (3  | HACD3              |         |
|     | 25.0935 | 26.1599 | 25.3321 | 25.2225 | 26.0644 | 24.9494 | 25.0016 | 25.6826 | 26.7572 | 25.8004 | 25.9354 | 26.0135 | Q16836;E9PF18;A | Q16836;E9PF18;A | Hydroxyacyl-coen    | HADH               |         |
|     | 26.9784 | 26.6679 | 26.5117 | 27.1388 | 27.0395 | 26.6252 | 26.3913 | 27.121  | 27.5969 | 26.0724 | 26.2334 | 26.2937 | P40939;H0YFD6;P | P40939          | Trifunctional enzy  | HADHA              |         |
|     | 26.8572 | 27.2789 | 26.8504 | 27.478  | 27.6776 | 27.003  | 26.5059 | 27.8686 | 28.4166 | 26.3727 | 26.8711 | 27.2132 | P55084;P55084-2 | P55084;P55084-2 | Trifunctional enzy  | HADHB              |         |
|     | 24.5234 | 25.6361 | 25.0351 | 24.4526 | 25.2508 | 24.949  | 24.5689 | NaN     | NaN     | 25.2836 | 24.8273 | 24.5427 | Q16775;H3BPK3;C | Q16775;H3BPK3;C | Hydroxyacylglutat   | HAGH               |         |
| NaN | NaN     | NaN     | NaN     | NaN     | NaN     | NaN     | NaN     | NaN     | 22.9819 | 23.182  | NaN     | NaN     | Q96S86;H3BTH8;f | Q96S86;H3BTH8;f | Hyaluronan and p    | HAPLN3             |         |
|     | 27.5336 | 27.8429 | 27.4553 | 27.1123 | 27.4563 | 27.3637 | 28.0187 | 28.1112 | 27.7279 | 27.4587 | 27.7546 | 27.9554 | P12081;P12081-4 | P12081;P12081-4 | Histidine--tRNA lig | HARS               |         |
|     | 21.8879 | NaN     | P49590;P49590-2 | P49590;P49590-2 | Probable histidine  | HARS2              |         |
|     | 25.4221 | 24.9384 | 25.0906 | 25.1021 | 25.0475 | 24.9436 | 24.5725 | 24.8498 | 24.3131 | 24.6101 | 25.1687 | 25.2734 | O14929;O14929-2 | O14929;O14929-2 | Histone acetyltr    | HAT1               |         |
|     | 22.6865 | NaN     | Q96CS2;Q96CS2-2 | Q96CS2;Q96CS2-2 | HAUS augmin-like    | HAUS1              |         |
|     | 23.2208 | NaN     | 23.1184 | 23.2847 | 23.1587 | 23.0724 | NaN     | NaN     | NaN     | NaN     | 23.118  | NaN     | O94927;O94927-2 | O94927          | HAUS augmin-like    | HAUS5              |         |
|     | 21.4182 | 21.656  | NaN     | 21.8723 | NaN     | NaN     | 21.5238 | NaN     | NaN     | NaN     | NaN     | NaN     | Q9BT25;Q9BT25-; | Q9BT25;Q9BT25-; | HAUS augmin-like    | HAUS8              |         |
| NaN | NaN     | NaN     | NaN     | NaN     | NaN     | NaN     | NaN     | NaN     | NaN     | 29.0023 | NaN     | NaN     | P69905          | P69905          | Hemoglobin subu     | HBA1               |         |
| NaN | NaN     | NaN     | NaN     | 22.1632 | NaN     | Q99075          | Q99075          | Proheparin-bindin   | HBEGF              |         |
|     | 25.9779 | 24.9333 | 25.385  | 25.6084 | 25.0869 | 25.2983 | 24.8906 | 25.3977 | 25.1604 | 24.9234 | 25.2752 | 25.1873 | Q9Y450;B7Z524;H | Q9Y450;B7Z524;H | HBS1-like protein   | HBS1L              |         |
| NaN | NaN     | NaN     | 22.6036 | 23.2284 | NaN     | NaN     | NaN     | NaN     | NaN     | 22.5095 | NaN     | NaN     | P53701          | P53701          | Cytochrome c-ty     | HCC5               |         |
|     | 26.0052 | 25.387  | 25.7367 | 25.7056 | 25.5143 | 25.7738 | 24.6644 | 24.0918 | NaN     | 25.7403 | 25.427  | 24.1894 | P51610;P51610-4 | P51610;P51610-4 | Host cell factor 1; | HCFC1              |         |
|     | 25.4448 | 24.9709 | 25.2648 | 24.4196 | 24.6571 | 24.7727 | 24.7847 | 25.1319 | 24.5756 | 23.5587 | NaN     | 24.553  | P14317;E7EVW7;f | P14317;E7EVW7   | Hematopoietic lin   | HCLS1              |         |
|     | 28.6419 | 27.254  | 28.2063 | 28.8095 | 27.7431 | 28.4926 | 27.1161 | 27.5597 | 26.7665 | 28.9022 | 28.753  | 27.8504 | Q13547;Q5TEE2   | Q13547;Q5TEE2   | Histone deacetyla   | HDAC1              |         |
| NaN | NaN     | NaN     | NaN     | NaN     | NaN     | NaN     | NaN     | NaN     | NaN     | 21.1512 | NaN     | NaN     | Q96DB2;F8WF94;  | Q96DB2;F8WF94;  | Histone deacetyla   | HDAC11             |         |
|     | 26.9116 | 25.6297 | 26.4362 | 26.7308 | 25.748  | 26.5492 | 25.8292 | 25.9305 | 25.2364 | 27.6197 | 27.3593 | 26.5993 | Q92769;Q92769-; | Q92769;Q92769-; | Histone deacetyla   | HDAC2              |         |
|     | 23.1066 | NaN     | 22.5146 | 22.7831 | NaN     | 22.7566 | NaN     | NaN     | NaN     | NaN     | NaN     | NaN     | O15379;O15379-2 | O15379;O15379-2 | Histone deacetyla   | HDAC3              |         |
|     | 24.1056 | 23.5352 | 24.1556 | 25.0976 | 24.418  | 24.173  | NaN     | NaN     | 23.2898 | 24.2232 | 24.0509 | 23.6572 | Q9UBN7;Q9UBN7   | Q9UBN7;Q9UBN7   | Histone deacetyla   | HDAC6              |         |
|     | 23.3809 | 23.536  | 23.4563 | 23.7776 | 23.8835 | NaN     | 23.6633 | NaN     | NaN     | 23.8078 | 24.2317 | NaN     | Q7Z4H3;V9GYS5;  | Q7Z4H3;V9GYS5;  | HD domain-contai    | HDCC2              |         |
|     | 25.6637 | 26.025  | 25.9078 | 25.505  | 25.8714 | 26.2114 | 25.9986 | 26.2389 | 25.849  | 26.5852 | 26.7809 | 26.5457 | P51858;P51858-3 | P51858;P51858-3 | Hepatoma-derive     | HDGF               |         |
|     | 29.0538 | 28.1829 | 28.2206 | 28.6329 | 28.0338 | 28.0848 | 27.8362 | 27.8766 | 28.3067 | 26.166  | 27.026  | 25.9232 | A0A024R4E5;Q00  | A0A024R4E5;Q00  | Vigilin             | HDLBP              |         |
|     | 26.2737 | 23.6835 | 25.5754 | 27.486  | 25.3269 | 25.6479 | NaN     | NaN     | NaN     | 25.7253 | 24.8    | NaN     | Q9H583;Q5T3Q7;  | Q9H583;Q5T3Q7   | HEAT repeat-cont    | HEATR1             |         |
|     | 22.5396 | NaN     | 22.2833 | 22.7044 | 22.2045 | 21.9977 | NaN     | NaN     | NaN     | 22.6272 | NaN     | NaN     | Q7Z4Q2;Q7Z4Q2-  | Q7Z4Q2          | HEAT repeat-cont    | HEATR3             |         |
| NaN | NaN     | NaN     | 23.4481 | NaN     | NaN     | 23.0111 | NaN     | NaN     | NaN     | NaN     | NaN     | NaN     | Q86XA9;F5H619;f | Q86XA9;F5H619;f | HEAT repeat-cont    | HEATR5A            |         |
|     | 24.2452 | 23.3919 | 23.6372 | 23.9249 | 23.3917 | 23.0207 | NaN     | NaN     | NaN     | 23.5451 | 23.7127 | 23.2072 | 23.3541         | Q9P2D3;Q9P2D3-  | Q9P2D3;Q9P2D3-      | HEAT repeat-cont   | HEATR5B |
|     | 23.5881 | NaN     | 22.6184 | 23.2801 | NaN     | Q6AI08;A0A087W  | Q6AI08;A0A087W  | HEAT repeat-cont    | HEATR6             |         |
|     | 26.2948 | 27.6834 | 27.196  | 26.2165 | 27.3954 | 27.059  | 27.7184 | 27.6317 | 27.7013 | 27.4677 | 27.5916 | 27.9065 | Q9NRV9;F5GWX2   | Q9NRV9;F5GWX2   | Heme-binding pro    | HEBP1              |         |
|     | 25.5091 | 25.7556 | 25.076  | 24.1281 | 25.6176 | 24.7069 | 26.0835 | 25.5862 | 25.3414 | 25.0563 | 25.679  | 25.4541 | Q9YSZ4;Q9YSZ4-2 | Q9YSZ4;Q9YSZ4-2 | Heme-binding pro    | HEBP2              |         |
|     | 25.9477 | 24.7904 | 25.2531 | 25.7596 | 24.7195 | 25.138  | 25.3672 | 23.6747 | 25.0634 | 25.0438 | 24.7687 | 24.9761 | Q9ULT8;A0A087X  | Q9ULT8;A0A087X  | E3 ubiquitin-prote  | HECTD1             |         |
|     | 22.9263 | 22.9336 | 23.1077 | 23.3457 | NaN     | 23.5464 | NaN     | NaN     | NaN     | NaN     | 23.4956 | NaN     | Q5T447;Q5T447-; | Q5T447          | E3 ubiquitin-prote  | HECTD3             |         |
| NaN | NaN     | NaN     | NaN     | NaN     | NaN     | 22.1675 | NaN     | NaN     | NaN     | NaN     | NaN     | NaN     | Q9ULI3;H7C4K2;H | Q9ULI3;H7C4K2;H | Protein HEG hom     | HEG1               |         |
|     | 27.1272 | NaN     | Q9NRZ9;A0A087V  | Q9NRZ9;A0A087V  | Lymphoid-specific   | HELLS              |         |
|     | 26.3995 | 27.0256 | 26.4281 | 26.1187 | 26.4208 | 26.0883 | 26.7956 | 26.2959 | 26.236  | 26.0194 | 25.4085 | 25.4016 | V9HW75;A0A087V  | V9HW75;A0A087V  | Nucleobindin-2;Ni   | HEL-S-109;NUCB2;   |         |
|     | 26.98   | 23.9272 | 25.3715 | 26.8043 | 25.4319 | 25.5329 | 23.4104 | NaN     | NaN     | 23.4908 | 24.7783 | 24.7687 | 24.4178         | Q9BYK8;Q9BYK8-; | Q9BYK8;Q9BYK8-;     | Helicase with zinc | HELZ2   |
|     | 25.9199 | 23.5708 | 25.1546 | 25.4867 | 23.7602 | 24.2224 | NaN     | NaN     | NaN     | 22.9428 | 24.1833 | NaN     | NaN             | O95714;A0A0J9Y  | O95714;A0A0J9Y      | E3 ubiquitin-prote | HERC2   |
|     | 26.654  | 25.7314 | 26.509  | 26.3477 | 25.6397 | 26.1273 | 26.1791 | 25.7752 | 24.6037 | 26.1159 | 26.0744 | 25.5447 | Q5GLZ8;Q5GLZ8-  | Q5GLZ8;Q5GLZ8-  | Probable E3 ubiq    | HERC4              |         |



|     |         |         |         |         |         |         |         |         |         |         |         |         |                  |                  |                     |                      |                     |
|-----|---------|---------|---------|---------|---------|---------|---------|---------|---------|---------|---------|---------|------------------|------------------|---------------------|----------------------|---------------------|
|     | 25.6203 | 23.8541 | 24.7255 | 25.3073 | 24.0059 | 24.7082 | 23.3302 | NaN     | NaN     |         | 23.9289 | 24.3438 | NaN              | Q9UII4;E9PBL0    | Q9UII4              | E3 ISG15--protein    | HERCS               |
|     | 24.1704 | 25.4397 | 24.4712 | 24.1119 | 24.6673 | 24.2761 | 26.8333 | 26.3004 | 25.4124 | 23.884  | 23.81   | 22.9795 | P06865;H3BS10;H  | P06865;H3BS10;H  | Beta-hexosaminid    | HEXA                 |                     |
|     | 27.6364 | 28.1561 | 27.2197 | 27.2022 | 27.3985 | 27.1936 | 29.1359 | 28.7958 | 28.3374 | 27.6012 | 27.3325 | 26.9922 | P07686;Q5URX0;H  | P07686;Q5URX0    | Beta-hexosaminid    | HEXB                 |                     |
|     | 23.2643 | NaN     | 21.9805 | NaN     | NaN     | NaN              | O94992           | O94992              | Protein HEXIM1       | HEXIM1              |
|     | 23.8508 | 24.5881 | 24.8013 | 24.0837 | 24.7906 | 25.5161 | NaN     | NaN     | NaN     | NaN     | NaN     | 23.7249 | Q30201;F8W7W8    | Q30201;F8W7W8    | Hereditary hemoc    | HFE                  |                     |
|     | 24.6178 | 23.7947 | 23.804  | 24.5158 | 23.807  | 23.8596 | 23.4476 | NaN     | NaN     | 24.2469 | 24.3294 | 24.6044 | Q9BTY7;E9PIX0    | Q9BTY7           | Protein HGH1 hon    | HGH1                 |                     |
|     | 27.2288 | 27.5867 | 27.0957 | 26.8045 | 27.0223 | 26.8742 | 26.9788 | 25.6176 | 27.4137 | 26.4652 | 26.353  | 26.9751 | O14964;O14964-2  | O14964;O14964-2  | Hepatocyte growt    | HGS                  |                     |
|     | 23.2107 | 24.4725 | 23.1524 | 23.0685 | 24.0109 | NaN     | NaN     | NaN     | 23.8133 | NaN     | 23.078  | 24.1301 | P31937;H7BZL2    | P31937;H7BZL2    | 3-hydroxyisobuty    | HIBADH               |                     |
| NaN |         | 23.3919 | 22.6867 | 22.4068 | 22.8617 | NaN     | NaN     | NaN     | 23.9659 | 22.4906 | 22.0202 | 23.1139 | Q6NVY1;B8ZZZ0;A  | Q6NVY1;B8ZZZ0;A  | 3-hydroxyisobuty    | HIBCH                |                     |
| NaN |         | 23.2105 | NaN     | Q96JB3;Q96JB3-2  | Q96JB3;Q96JB3-2  | Hypermethylated     | HIC2                 |                     |
|     | 22.6572 | NaN     | Q8IV36;Q8IV36-2  | Q8IV36;Q8IV36-2  | Protein HID1        | HID1                 |                     |
| NaN |         | 22.3927 | 21.9265 | NaN     | 23.3109 | NaN     | NaN     | NaN     | NaN     | 21.7242 | NaN     | NaN     | Q9NWT6;E9PL41    | Q9NWT6           | Hypoxia-inducible   | HIF1AN               |                     |
| NaN |         | NaN     | 23.3286 | NaN     | NaN     | NaN     | Q9Y241;C9JAW5;C  | Q9Y241;C9JAW5;C  | HIG1 domain fami    | HIGD1A               |                     |
|     | 28.2417 | 30.1817 | 29.5459 | 28.8732 | 30.1981 | 29.7317 | 29.9146 | 29.5554 | 29.6325 | 30.0521 | 30.0688 | 30.3721 | P49773;D6REP8;D  | P49773           | Histidine triad nuc | HINT1                |                     |
|     | 24.2001 | 25.4635 | 23.9757 | 23.9871 | 24.9983 | 24.0142 | 24.5092 | 24.8424 | NaN     | 24.3456 | 24.8092 | NaN     | Q9BX68           | Q9BX68           | Histidine triad nuc | HINT2                |                     |
|     | 23.134  | 24.4102 | 24.1198 | 23.7699 | 23.8715 | NaN     | NaN     | NaN     | NaN     | 23.4947 | NaN     | NaN     | Q9NQE9           | Q9NQE9           | Histidine triad nuc | HINT3                |                     |
|     | 26.5101 | 26.7405 | 27.261  | 27.08   | 27.0328 | 27.1144 | 26.2481 | 25.8989 | NaN     | 26.9259 | 26.9126 | 25.6934 | O75146;O75146-2  | O75146;O75146-2  | Huntingtin-intera   | HIP1R                |                     |
|     | 26.2759 | 26.6218 | 26.0348 | 27.1389 | 25.7572 | 26.4559 | 27.8081 | 26.4998 | 25.4192 | 26.2935 | 27.0878 | 26.8215 | P16403           | P16403           | Histone H1.2        | HIST1H1C             |                     |
|     | 29.6426 | 30.2379 | 30.0487 | 31.3146 | 30.4316 | 30.4452 | 31.2919 | 30.4195 | 29.2233 | 30.1389 | 31.7252 | 31.4571 | P10412;P16402;Q  | P10412;P16402    | Histone H1.4;Hist   | HIST1H1E;HIST1H1F    |                     |
|     | 27.4768 | 26.7832 | 26.0083 | 27.9814 | 26.4117 | 27.1969 | 27.1507 | NaN     | NaN     | 26.2591 | 26.6895 | 25.6894 | Q93077;Q7L7L0;P  | Q93077;Q7L7L0;P  | Histone H2A type    | HIST1H2AC;HIST1H2AD  |                     |
|     | 32.3873 | 32.1613 | 31.7414 | 33.2689 | 31.9671 | 31.9229 | 32.3265 | 30.8817 | 29.6563 | 31.2556 | 31.955  | 31.702  | P0C0S8;Q99878;C  | P0C0S8;Q99878;C  | Histone H2A type    | HIST1H2AG;HIST1H2AH  |                     |
| NaN |         | NaN     | 24.0119 | NaN     | 26.9637 | NaN     | NaN     | NaN     | NaN     | NaN     | NaN     | 26.0166 | NaN              | P62807;B2R4S9    | P62807;B2R4S9       | Histone H2B type     | HIST1H2BC;HIST1H2BD |
| NaN |         | NaN     | 26.6963 | NaN     | NaN     | NaN     | NaN              | P58876           | P58876              | Histone H2B type     | HIST1H2BD           |
|     | 32.9998 | 33.3759 | 33.0283 | 34.0464 | 33.612  | 33.3271 | 33.6925 | 32.7224 | 31.6303 | 32.5365 | 33.8086 | 33.947  | Q93079;Q5QNW6    | Q93079;Q5QNW6    | Histone H2B type    | HIST1H2BH;HIST1H2BI  |                     |
| NaN |         | NaN     | NaN     | 23.8915 | 25.4143 | NaN     | NaN     | 26.6075 | 25.5728 | NaN     | 25.4785 | NaN     | O60814;P57053    | O60814;P57053    | Histone H2B type    | HIST1H2BK;H2BF5      |                     |
| NaN |         | NaN     | NaN     | 25.3464 | NaN     | Q99879           | Q99879           | Histone H2B type    | HIST1H2BM            |                     |
| NaN |         | NaN     | 25.1202 | NaN     | Q99877;U3KQK0    | Q99877;U3KQK0    | Histone H2B type    | HIST1H2BN            |                     |
|     | 28.9298 | 29.1029 | 29.0635 | 30.171  | 29.4795 | 29.331  | 29.2614 | 28.8517 | 27.6385 | 28.7618 | 30.1036 | 30.057  | P23527           | P23527           | Histone H2B type    | HIST1H2BO            |                     |
|     | 32.6324 | 32.8606 | 32.209  | 33.6048 | 32.7267 | 32.494  | 33.4554 | 31.5552 | 31.4482 | 31.6209 | 32.919  | 32.9988 | P62805           | P62805           | Histone H4          | HIST1H4A             |                     |
| NaN |         | 22.977  | 24.3234 | 27.2004 | NaN     | 26.737  | NaN     | NaN     | NaN     | NaN     | 23.4264 | 23.0073 | Q6FI13;Q16777    | Q6FI13;Q16777    | Histone H2A type    | HIST2H2AA3;HIST2H2AB |                     |
|     | 32.4332 | 32.8934 | 32.0901 | 33.0924 | 33.2935 | 32.6481 | 33.0232 | 32.2962 | 31.9937 | 31.4826 | 33.4027 | 33.8364 | Q71D13;P68431;P  | Q71D13;P68431;P  | Histone H3.2;Hist   | HIST2H3A;HIST2H3B    |                     |
|     | 27.6842 | 27.5615 | 26.741  | 29.0333 | 27.1792 | 24.1143 | 28.3694 | 26.6557 | 26.3811 | 27.5801 | 28.5327 | 28.4466 | Q5TEC6           | Q5TEC6           | Histone H3          | HIST2H3P52           |                     |
| NaN |         | NaN     | NaN     | 22.7741 | NaN     | NaN     | NaN     | NaN     | NaN     | NaN     | 22.9497 | NaN     | Q8NCD3;C9JWC4;   | Q8NCD3;C9JWC4;   | Holliday junction   | HJURP                |                     |
|     | 26.3174 | 26.4172 | 26.4088 | 26.7656 | 26.573  | 26.5557 | 26.7352 | 27.5987 | 28.0954 | 25.9322 | 25.9742 | 26.7776 | P19367;P19367-4  | P19367;P19367-4  | Hexokinase-1        | HK1                  |                     |
|     | 29.4624 | 27.931  | 28.344  | 28.9052 | 27.7946 | 27.9819 | 28.2742 | 28.4693 | 28.1453 | 28.0038 | 27.8304 | 27.5063 | P52789;E9PB90;P  | P52789;E9PB90    | Hexokinase-2;Hex    | HK2                  |                     |
|     | 32.5238 | 33.0615 | 33.5502 | 32.8656 | 33.4004 | 33.8599 | 32.7105 | 32.6213 | 32.9818 | 33.4817 | 33.0405 | 32.8169 | P01892;A0A0G2J1P | P01892;A0A0G2J1P | HLA class I histoc  | HLA-A                |                     |
| NaN |         | NaN     | NaN     | 23.9131 | NaN     | P10316;P01891    | P10316;P01891    | HLA class I histoc  | HLA-A                |                     |
| NaN |         | NaN     | NaN     | NaN     | NaN     | NaN     | 22.8774 | NaN     | NaN     | NaN     | NaN     | NaN     | P30459;Q9GJ45;P  | P30459;Q9GJ45;P  | HLA class I histoc  | HLA-A                |                     |
| NaN |         | NaN     | P01889;F6U0H7    | P01889;F6U0H7    | HLA class I histoc  | HLA-B                |                     |
|     | 30.882  | 31.389  | 32.0816 | 31.5052 | 31.4821 | 32.2697 | 30.8135 | 30.0981 | 30.9078 | 31.3921 | 30.6542 | 30.6168 | P30479;Q31611;A  | P30479           | HLA class I histoc  | HLA-B                |                     |
| NaN |         | NaN     | NaN     | 22.7142 | NaN     | P30488;P30483;P  | P30488;P30483;P  | HLA class I histoc  | HLA-B                |                     |
|     | 26.1087 | 27.069  | 27.5107 | 27.1679 | 27.936  | 27.6325 | 26.6095 | 27.1395 | 27.667  | 27.3758 | 27.3328 | 27.147  | Q04826;P30485;P  | Q04826;P30485;P  | HLA class I histoc  | HLA-B                |                     |
|     | 24.0168 | 24.5148 | 24.645  | 24.2184 | 24.1019 | 25.3359 | NaN     | NaN     | NaN     | NaN     | 24.9237 | NaN     | P10321;A2AEA2    | P10321;A2AEA2    | HLA class I histoc  | HLA-C                |                     |
| NaN |         | NaN     | NaN     | 22.6993 | NaN     | P30508;P30510;Q  | P30508;P30510;Q  | HLA class I histoc  | HLA-C                |                     |
|     | 27.5901 | 27.8775 | 28.3723 | 27.7434 | 27.7598 | 28.3799 | 28.0156 | 27.6562 | 28.1905 | 28.2887 | 27.6041 | 27.3257 | Q95604;A0A0G2J1I | Q95604           | HLA class I histoc  | HLA-C                |                     |
| NaN |         | NaN     | NaN     | NaN     | NaN     | NaN     | 20.8408 | NaN     | NaN     | NaN     | NaN     | NaN     | P13747;Q6DU44    | P13747;Q6DU44    | HLA class I histoc  | HLA-E                |                     |
|     | 26.6527 | 25.8255 | 26.3794 | 26.8281 | 25.8157 | 26.4576 | 26.9329 | 26.2568 | 27.0951 | 27.2182 | 26.2679 | 26.6263 | Q8TCT9;Q8TCT9-5  | Q8TCT9;Q8TCT9-5  | Minor histocomp     | HM13                 |                     |
|     | 23.8944 | 24.5026 | 24.2284 | 23.9809 | 24.7376 | 24.6213 | 23.9085 | NaN     | NaN     | 24.3283 | NaN     | NaN     | P08397;P08397-3  | P08397;P08397-3  | Porphobilinogen c   | HMBS                 |                     |
| NaN |         | NaN     | NaN     | 22.6069 | NaN     | Q96FZ2;D6RAZ3;E  | Q96FZ2;D6RAZ3;E  | Embryonic stem c    | HMCE5                |                     |
|     | 29.2054 | 28.5826 | 29.1496 | 30.2731 | 29.2687 | 29.3846 | 28.2184 | 27.1596 | 27.2807 | 29.0446 | 29.2797 | 28.3001 | P17096;P17096-3  | P17096;P17096-3  | High mobility gro   | HMGA1                |                     |
|     | 25.9073 | NaN     | NaN     | 26.2033 | 25.8464 | NaN     | NaN     | NaN     | NaN     | 26.0266 | 25.8834 | NaN     | P17096-2         | P17096-2         | High mobility gro   | HMGA1                |                     |
| NaN |         | 23.7255 | NaN     | NaN     | 23.5291 | NaN     | NaN     | NaN     | NaN     | NaN     | 23.1578 | NaN     | P52926;F5H2U8;F  | P52926;F5H2U8;F  | High mobility gro   | HMGA2                |                     |
|     | 28.288  | 28.4556 | 28.2428 | 28.4132 | 28.5089 | 28.5847 | 28.8422 | 28.8826 | 28.5794 | 28.6415 | 29.1928 | 29.2411 | P09429;Q5T7C4;B  | P09429;Q5T7C4;B  | High mobility gro   | HMGB1;HMGB1P1        |                     |
|     | 26.3439 | 26.2745 | 26.0467 | 26.421  | 26.1784 | 26.1574 | 26.6225 | 27.0022 | 26.3611 | 26.4985 | 26.7145 | 27.1557 | P26583;D6R9A6    | P26583;D6R9A6    | High mobility gro   | HMGB2                |                     |
|     | 23.9302 | NaN     | 24.0914 | 23.5978 | 24.0118 | 24.6418 | NaN     | NaN     | NaN     | 23.9492 | 24.7617 | 24.7146 | O15347;E9PE56;E  | O15347;E9PE56;E  | High mobility gro   | HMGB3                |                     |
|     | 21.5491 | NaN     | P35914;P35914-3  | P35914;P35914-3  | Hydroxymethylgl     | HMGCL                |                     |
|     | 25.0188 | 24.7808 | 24.8961 | 24.819  | 23.7399 | 24.4738 | 26.2199 | 25.811  | 24.4932 | 26.0862 | 26.142  | 25.2837 | Q01581;D6RIW1    | Q01581           | Hydroxymethylgl     | HMGCS1               |                     |
| NaN |         | NaN     | NaN     | 25.3434 | NaN     | P05114;F22ZW6;F  | P05114;F22ZW6;F  | Non-histone chro    | HMGN1                |                     |
|     | 24.7128 | 24.7628 | 23.7525 | 24.3791 | 23.7597 | NaN     | NaN     | NaN     | NaN     | 24.7239 | 23.7261 | NaN     | P05204;Q15651;A  | P05204           | Non-histone chro    | HMGN2                |                     |
|     | 23.6591 | 24.1555 | 23.9123 | 24.1762 | 24.3023 | NaN     | NaN     | NaN     | NaN     | 23.9575 | 24.0684 | NaN     | O00479           | O00479           | High mobility gro   | HMGN4                |                     |



|         |         |         |         |         |         |         |         |         |         |         |         |                 |                 |                  |               |
|---------|---------|---------|---------|---------|---------|---------|---------|---------|---------|---------|---------|-----------------|-----------------|------------------|---------------|
| 26.238  | 25.3118 | 25.9586 | 25.7815 | 25.4749 | 25.4718 | 24.2528 | NaN     | NaN     | 24.3996 | 24.2326 | NaN     | Q92619;K7ES98;K | Q92619;K7ES98;K | Minor histocomp  | HMHA1         |
| 21.7458 | NaN     | Q75330;O75330-4 | O75330;O75330-4 | Hyaluronan med   | HMMR          |
| 26.3236 | 26.6968 | 26.5489 | 26.2253 | 26.6267 | 26.1943 | 26.4457 | 27.0996 | 26.4518 | 26.6387 | 26.144  | 25.3074 | P30519;AOA087W  | P30519;AOA087W  | Heme oxygenase   | HMOX2         |
| 26.0263 | 27.5249 | 26.9024 | 25.3886 | 27.2583 | 26.7322 | 26.1698 | 27.5269 | 26.7053 | 25.7572 | 26.2216 | 26.5688 | Q9UK76;Q9UK76-  | Q9UK76;Q9UK76-  | Hematological an | HN1           |
| 25.3827 | 26.5577 | 25.8591 | 25.0409 | 26.1608 | 25.7828 | 25.439  | 26.2896 | 25.013  | 25.1074 | 25.669  | 25.7992 | Q9H910;Q9H910-  | Q9H910;Q9H910-  | Hematological an | HN1L          |
| 23.788  | 23.3765 | 23.6808 | 23.1603 | 23.462  | 23.9833 | 23.8436 | NaN     | NaN     | 23.8072 | 23.6514 | 23.8765 | P50135;P50135-2 | P50135          | Histamine N-meth | HNMT          |
| 26.7226 | 27.5064 | 27.1884 | 27.1029 | 27.1645 | 27.1288 | 25.864  | 27.71   | NaN     | 27.0591 | 27.531  | 27.0119 | Q13151          | Q13151          | Heterogeneous n  | HNRNPA0       |
| 30.6179 | 31.056  | 30.9663 | 31.2242 | 30.9727 | 30.9974 | 30.6128 | 31.0032 | 30.4362 | 31.1807 | 31.4065 | 30.9253 | P09651;F8W6I7;P | P09651;F8W6I7;P | Heterogeneous n  | HNRNPA1;HNRNP |
| 30.3531 | 30.8559 | 30.6875 | 30.6764 | 31.1092 | 30.8163 | 30.1832 | 31.001  | 30.5473 | 30.493  | 30.9587 | 30.8605 | P22626;AOA087W  | P22626;AOA087W  | Heterogeneous n  | HNRNPA2B1     |
| 29.3546 | 28.8663 | 28.5793 | 29.1097 | 28.5784 | 28.881  | 28.0908 | 28.1834 | 27.6155 | 28.7217 | 28.7948 | 28.0249 | P51991;H7C1J8   | P51991          | Heterogeneous n  | HNRNPA3       |
| 25.7614 | 25.5498 | 25.886  | 25.8356 | 25.8262 | 26.5996 | 25.3303 | NaN     | NaN     | NaN     | 26.5393 | NaN     | P51991-2        | P51991-2        | Heterogeneous n  | HNRNPA3       |
| 28.4528 | 28.0946 | 27.8823 | 28.0263 | 28.0814 | 27.9069 | 27.9795 | 28.0797 | 27.1554 | 28.4163 | 29.1081 | 28.6123 | Q99729-3;Q9972  | Q99729-3;Q9972  | Heterogeneous n  | HNRNPAB       |
| 31.3933 | 30.7388 | 30.9632 | 31.6666 | 30.8903 | 31.2487 | 29.5849 | 30.384  | 29.7803 | 30.3227 | 31.0019 | 30.6107 | P07910-2;G3V4W  | P07910-2;G3V4W  | Heterogeneous n  | HNRNPC        |
| NaN     | NaN     | NaN     | 23.1169 | NaN     | P07910;G3V2Q1;C | P07910;G3V2Q1;C | Heterogeneous n  | HNRNPC        |
| 29.1751 | 29.1877 | 28.9714 | 29.6339 | 28.9934 | 29.0393 | 28.8984 | 28.1948 | 28.0098 | 29.3963 | 29.2636 | 28.9068 | Q14103;Q14103-  | Q14103;Q14103-  | Heterogeneous n  | HNRNPD        |
| 26.3749 | 25.4078 | 25.1337 | 26.0822 | 24.5897 | 24.87   | 23.8106 | NaN     | NaN     | 25.3228 | 25.0639 | 24.711  | O14979-3;O1497  | O14979-3;O1497  | Heterogeneous n  | HNRNPDL       |
| 30.6456 | 29.5812 | 29.6963 | 30.4072 | 29.3328 | 29.9723 | 28.2193 | 28.1646 | 27.7677 | 29.3021 | 28.9471 | 28.6405 | P52597          | P52597          | Heterogeneous n  | HNRNPF        |
| 29.7717 | 28.6926 | 28.5818 | 29.3752 | 28.7077 | 28.7565 | 28.0694 | 28.6756 | 28.0085 | 28.4541 | 28.4592 | 28.7231 | P31943;G8JLB6;E | P31943;G8JLB6;E | Heterogeneous n  | HNRNPH1       |
| 25.9374 | 25.3773 | 24.94   | 25.7919 | 25.1177 | 25.0418 | NaN     | 25.0456 | NaN     | 24.3514 | 24.6483 | 24.6537 | P55795          | P55795          | Heterogeneous n  | HNRNPH2       |
| 28.1664 | 28.5475 | 28.1432 | 28.3228 | 28.5545 | 28.587  | 27.7189 | 28.8183 | 27.896  | 28.7362 | 29.1594 | 28.8387 | P31942;P31942-2 | P31942;P31942-2 | Heterogeneous n  | HNRNPH3       |
| 31.4167 | 30.691  | 30.8642 | 31.3344 | 30.9349 | 31.0308 | 29.9944 | 30.3798 | 29.5119 | 31.1276 | 31.0641 | 30.7183 | P61978-3;P6197  | P61978-3;P6197  | Heterogeneous n  | HNRNPK        |
| 30.1639 | 29.1834 | 29.1338 | 29.9745 | 29.3634 | 29.3067 | 28.443  | 28.6727 | 28.5637 | 28.93   | 29.2977 | 28.7137 | P14866;MQQXS5;I | P14866;MQQXS5;I | Heterogeneous n  | HNRNPL</      |



|     |         |         |         |         |         |         |         |         |         |         |         |         |                 |                 |                                                    |
|-----|---------|---------|---------|---------|---------|---------|---------|---------|---------|---------|---------|---------|-----------------|-----------------|----------------------------------------------------|
|     | 25.0365 | 25.3372 | 25.0416 | 24.6751 | 25.5286 | 25.1427 | 26.9691 | 27.0558 | 25.8012 | 27.0633 | 26.8792 | 26.9837 | E9PN89          | E9PN89          | HSPA8                                              |
|     | 33.9135 | 34.6543 | 34.2368 | 33.8406 | 34.5723 | 34.3992 | 34.6002 | 34.5669 | 34.4108 | 34.6788 | 34.7128 | 34.8511 | P11142;E9PKE3;P | P11142;E9PKE3;P | Heat shock cognate protein, HSPA8                  |
|     | 31.0356 | 31.8081 | 31.0142 | 31.0739 | 31.8648 | 31.1229 | 30.8364 | 31.6918 | 31.9621 | 31.3168 | 31.4303 | 31.6473 | P38646;D6RJL2;D | P38646          | Stress-70 protein, HSPA9                           |
|     | 28.071  | 28.2711 | 27.9675 | 28.2597 | 28.4298 | 28.0634 | 30.0204 | 30.246  | 29.7128 | 29.9347 | 30.1266 | 29.8808 | P04792;F8WE04;C | P04792;F8WE04   | Heat shock protein 70, HSPB1                       |
|     | 25.8099 | 25.733  | 25.9133 | 25.7738 | 25.6099 | 25.8784 | 25.4144 | NaN     | 25.6929 | 25.7898 | NaN     | NaN     | A6NIR2;X6R7Y7   | A6NIR2;X6R7Y7   | HSPB11                                             |
|     | 25.5657 | 23.6357 | 25.1848 | 25.1898 | 24.6668 | 24.956  | 24.7442 | 24.6048 | 25.0504 | 25.2636 | 26.0107 | NaN     | Q9NZL4;Q9NZL4-1 | Q9NZL4;Q9NZL4-1 | Hsp70-binding protein, HSPBP1                      |
|     | 31.1322 | 32.4163 | 31.6214 | 31.6873 | 32.4668 | 31.6292 | 31.2126 | 32.7553 | 33.0699 | 30.1388 | 31.0429 | 31.5333 | P10809;E7EXB4;E | P10809          | 60 kDa heat shock protein, HSPD1                   |
|     | 29.1067 | 30.5445 | 29.5586 | 29.265  | 30.1131 | 29.5302 | 30.0561 | 30.7721 | 30.7916 | 29.4357 | 30.0227 | 30.1343 | P61604;B8ZZL8;B | P61604;B8ZZL8   | 10 kDa heat shock protein, HSPF1                   |
|     | 24.9966 | 25.5864 | 24.8977 | 24.8424 | 25.6114 | 25.0307 | 25.1848 | 26.0037 | NaN     | 25.5629 | 25.7419 | 25.419  | S4R3N1;B4DM50;S | S4R3N1          | HSPF1-MOB4                                         |
|     | 23.0716 | 23.2257 | 24.6039 | 22.4655 | 23.8968 | 22.7419 | 28.7755 | 27.8869 | NaN     | 22.4212 | NaN     | 23.8209 | P98160;H7BYA5;A | P98160          | Basement membrane protein, HSPG2                   |
|     | 30.2226 | 29.6081 | 29.6954 | 29.9535 | 29.5724 | 29.5694 | 30.0734 | 30.0977 | 29.9825 | 30.1828 | 29.8307 | 29.9877 | Q92598;Q92598-1 | Q92598;Q92598-1 | Heat shock protein 90, HSPH1                       |
|     | 24.2242 | 25.2443 | 25.0549 | 24.4598 | 25.2427 | 24.8981 | 24.268  | NaN     | 24.9071 | 24.7982 | 25.0355 | 25.7548 | Q9BUP3;Q9BUP3-1 | Q9BUP3;Q9BUP3-1 | Oxidoreductase, Hsp70-binding protein, HSPH1       |
|     | 24.5326 | 24.1132 | 24.806  | 24.7276 | 24.8528 | 25.2532 | NaN     | NaN     | NaN     | 23.5669 | 23.9425 | NaN     | O43719;Q5H919;C | O43719;Q5H919;C | HIV Tat-specific factor, HTATSF1                   |
| NaN | NaN     | NaN     | NaN     | NaN     | NaN     | NaN     | 24.8101 | 24.4643 | NaN     | 23.4368 | 24.1402 | 23.5982 | Q92743;H0Y7G9   | Q92743          | Serine protease, HTRA1                             |
|     | 23.2243 | 23.4385 | 22.8646 | 23.2011 | 23.4169 | NaN     | NaN     | NaN     | NaN     | NaN     | 23.443  | 23.261  | O43464;A0A0C4D  | O43464;A0A0C4D  | Serine protease, HTRA2                             |
|     | 22.433  | NaN     | 22.6988 | 22.9738 | NaN     | NaN     | NaN     | NaN     | NaN     | 22.8231 | 22.4551 | NaN     | P42858          | P42858          | Huntingtin, HTT                                    |
|     | 22.1151 | NaN     | O60921;O60921-1 | O60921;O60921-1 | Checkpoint protein, HUS1                           |
|     | 28.2521 | 27.1344 | 28.0247 | 28.3125 | 27.5904 | 27.9952 | 27.0926 | 27.1131 | 26.6964 | 27.5522 | 27.5219 | 26.7032 | Q7Z6Z7;Q7Z6Z7-2 | Q7Z6Z7;Q7Z6Z7-2 | E3 ubiquitin-protein ligase, HUWE1                 |
|     | 22.9969 | NaN     | Q96D96;F8VPF7;C | Q96D96;F8VPF7;C | Voltage-gated calcium channel, HVCN1               |
|     | 23.5424 | 23.3244 | 23.8203 | 23.4331 | 23.4411 | NaN     | NaN     | NaN     | NaN     | 24.0248 | 24.3764 | NaN     | Q12891          | Q12891          | Hyaluronidase-2, HYAL2                             |
|     | 25.2311 | 25.9497 | 24.991  | 25.0052 | 25.4705 | NaN     | 26.158  | 26.4414 | 26.6461 | 25.9958 | 25.6153 | 26.7927 | Q5T013;F6UJY1;J | Q5T013;F6UJY1;J | Putative hydroxylase, HYI                          |
|     | 30.6399 | 30.451  | 30.1972 | 30.4881 | 30.2438 | 30.1725 | 29.8698 | 30.6624 | 30.5114 | 29.8779 | 29.6992 | 29.7154 | Q9Y4L1;A0A087X  | Q9Y4L1;A0A087X  | Hypoxia-inducible factor, HYOU1                    |
| NaN | NaN     | 23.4367 | NaN     | NaN     | NaN     | NaN     | 23.1126 | NaN     | NaN     | NaN     | NaN     | NaN     | Q9NX55          | Q9NX55          | Huntingtin-interacting protein, HYPK               |
|     | 23.1865 | 23.8532 | 23.5405 | 22.8039 | 23.7339 | 23.1871 | NaN     | NaN     | NaN     | 23.5722 | 23.3719 | NaN     | Q2TAA2;H7C5G1;Q | Q2TAA2;H7C5G1;Q | Isoamyl acetate hydrolase, IAH1                    |
|     | 30.0413 | 28.9114 | 29.246  | 29.8129 | 29.3008 | 29.4239 | 28.7717 | 29.2929 | 28.8881 | 29.5498 | 29.3714 | 28.9013 | P41252;A0A0A0M  | P41252;A0A0A0M  | Isoleucine-tRNA synthetase, IARS                   |
|     | 25.9392 | 25.3549 | 25.2282 | 25.6456 | 25.5113 | 25.2455 | 24.7314 | 24.3766 | 26.0284 | 25.2676 | 25.5645 | 25.312  | Q9NSE4          | Q9NSE4          | Isoleucine-tRNA synthetase, IARS2                  |
| NaN | NaN     | NaN     | 20.5858 | 20.8746 | NaN     | NaN     | NaN     | NaN     | NaN     | 21.0184 | 21.4178 | NaN     | Q5T440          | Q5T440          | Putative transferase, IBAS7                        |
|     | 28.677  | 29.3875 | 29.5002 | 28.9422 | 29.2529 | 29.7889 | 27.9347 | 26.8483 | 27.9957 | 28.1661 | 27.5632 | 27.9863 | P05362;K7EKL8;E | P05362          | Intercellular adhesion molecule, ICAM1             |
|     | 22.6152 | NaN     | 23.3441 | NaN     | NaN     | P13598;J3QKR4;J | P13598;J3QKR4;J | Intercellular adhesion molecule, ICAM2             |
|     | 22.3762 | NaN     | 21.8926 | 22.7231 | NaN     | Q14197;J3KS15   | Q14197;J3KS15   | Peptidyl-tRNA hydrolase, ICT1                      |
|     | 25.6453 | 25.9644 | 26.0212 | 25.6149 | 25.9937 | 25.7387 | 26.2019 | 26.4424 | 25.9077 | 26.0258 | 26.5238 | 26.6129 | P14735;P14735-2 | P14735;P14735-2 | Insulin-degrading enzyme, IDE                      |
|     | 27.7659 | 28.3964 | 28.068  | 27.5128 | 27.9935 | 28.0044 | 28.7691 | 28.364  | 28.1774 | 28.4605 | 28.3971 | 28.1135 | O75874;C9J4N6;C | O75874          | Isocitrate dehydrogenase, IDH1                     |
|     | 27.7448 | 27.4934 | 26.9923 | 27.699  | 27.4315 | 27.0589 | 25.763  | 26.1717 | 27.0611 | 25.9088 | 26.432  | 26.3946 | P48735;P48735-2 | P48735;P48735-2 | Isocitrate dehydrogenase, IDH2                     |
|     | 27.6854 | 27.1817 | 26.8423 | 27.4834 | 27.7349 | 27.45   | 26.0871 | 27.2427 | 27.3583 | 27.3677 | 27.6605 | 26.7971 | P50213;H0YL72;P | P50213;H0YL72;P | Isocitrate dehydrogenase, IDH3A                    |
|     | 27.6378 | 27.2533 | 26.8617 | 27.7154 | 27.3532 | 27.0198 | 26.1591 | 25.5714 | 27.3668 | 27.3856 | 27.1996 | 26.6589 | O43837;A0A087V  | O43837;A0A087V  | Isocitrate dehydrogenase, IDH3B                    |
|     | 26.0364 | 25.7054 | 25.9316 | 25.8017 | 26.2223 | 26.3349 | NaN     | 23.6678 | 25.2177 | 25.4031 | 24.8013 | 23.9712 | P51553;P51553-2 | P51553;P51553-2 | Isocitrate dehydrogenase, IDH3G                    |
|     | 24.0532 | 24.0781 | 24.2895 | 24.0132 | 23.4851 | 23.8991 | 24.6566 | 24.9338 | 24.5633 | 24.7133 | 24.3778 | 24.1992 | Q13907;Q13907-1 | Q13907;Q13907-1 | Isopentenyl-diphosphate synthase, IDI1             |
| NaN | NaN     | NaN     | NaN     | NaN     | NaN     | NaN     | NaN     | NaN     | NaN     | 21.7167 | NaN     | NaN     | P22304;P22304-3 | P22304;P22304-3 | Durionate 2-sulfate, IDS                           |
| NaN | NaN     | NaN     | NaN     | 21.1554 | NaN     | Q9Y5U9          | Q9Y5U9          | Immediate early response protein, IER3IP1          |
|     | 27.3018 | 26.8837 | 26.7338 | 27.6939 | 27.1365 | 26.8541 | 25.7187 | 25.9838 | 25.9776 | 26.9417 | 27.2525 | 26.9745 | Q16666;Q16666-1 | Q16666;Q16666-1 | Gamma-interferon, IFI16                            |
| NaN | NaN     | NaN     | NaN     | NaN     | NaN     | NaN     | 25.555  | NaN     | NaN     | NaN     | NaN     | NaN     | P13284;M0QZG3   | P13284;M0QZG3   | Gamma-interferon, IFI30                            |
|     | 23.8656 | 24.4969 | 23.8849 | 23.5302 | 24.4403 | 23.4606 | 23.9845 | NaN     | 23.6079 | 23.7987 | 23.9353 | 23.4382 | P80217;P80217-2 | P80217;P80217-2 | Interferon-inducible protein, IFI35                |
| NaN | NaN     | NaN     | NaN     | 18.8414 | NaN     | Q9BYX4;Q9BYX4-1 | Q9BYX4;Q9BYX4-1 | Interferon-inducible protein, IFIH1                |
|     | 26.8406 | 26.059  | 26.3325 | 26.6154 | 26.1376 | 26.3695 | 27.1663 | 26.699  | 26.796  | 26.7345 | 26.4729 | 26.3076 | P09914;P09914-2 | P09914;P09914-2 | Interferon-inducible protein, IFIT1                |
|     | 26.9848 | 26.2994 | 26.4247 | 26.5042 | 26.3021 | 26.3673 | 26.6186 | 25.3052 | 26.7766 | 25.6722 | 25.683  | 25.9813 | P09913;A0A087X  | P09913;A0A087X  | Interferon-inducible protein, IFIT2                |
|     | 26.4987 | 26.423  | 26.4482 | 26.326  | 26.0396 | 26.2725 | 27.0704 | 26.4758 | 26.8397 | 25.9738 | 25.8742 | 26.2364 | O14879          | O14879          | Interferon-inducible protein, IFIT3                |
|     | 25.4892 | 24.5764 | 25.1079 | 25.3497 | 24.8287 | 24.7664 | 24.0801 | NaN     | NaN     | 24.7796 | 24.5656 | 24.3687 | Q13325;Q13325-1 | Q13325;Q13325-1 | Interferon-inducible protein, IFIT5                |
|     | 25.807  | 26.0621 | 26.3685 | 25.6045 | 25.6467 | 26.1884 | NaN     | NaN     | NaN     | 24.6929 | NaN     | NaN     | P13164;Q01629;C | P13164;Q01629;C | Interferon-inducible protein, IFITM1;IFITM2;IFITM3 |
|     | 23.5053 | 22.4919 | 23.328  | 23.3088 | 22.972  | NaN     | NaN     | NaN     | NaN     | 23.1099 | NaN     | NaN     | P15260;Q5TFC9;F | P15260;Q5TFC9;F | Interferon gamma, IFNGR1                           |
|     | 23.2227 | 22.3663 | 22.5236 | 23.2117 | 22.5048 | 22.5712 | NaN     | NaN     | NaN     | 22.2862 | NaN     | NaN     | Q12894;A0A0R4J  | Q12894;A0A0R4J  | Interferon-related protein, IFRD2                  |
|     | 23.4936 | 23.2464 | 23.8575 | 23.3382 | 24.2469 | 23.1031 | 23.1802 | NaN     | NaN     | 22.5646 | 22.9061 | 23.65   | Q9BW83;Q9BW8-1  | Q9BW83;Q9BW8-1  | Intraflagellar transport protein, IFT27            |
| NaN | NaN     | NaN     | 23.9774 | NaN     | Q96LB3;Q96LB3-2 | Q96LB3          | Intraflagellar transport protein, IFT74            |
|     | 24.1471 | 24.7315 | 24.5161 | 24.4527 | 24.5624 | 24.6839 | NaN     | 25.1683 | NaN     | 24.9049 | 24.4851 | 24.4903 | P78318          | P78318          | Immunoglobulin-like protein, IGBP1                 |
|     | 26.5132 | 26.36   | 27.2181 | 26.8213 | 26.2217 | 27.3646 | 26.3426 | 25.3724 | 25.8267 | 27.5325 | 27.0821 | 27.0858 | P08069;C9J5X1;H | P08069;C9J5X1   | Insulin-like growth factor, IGF1R                  |
| NaN | NaN     | NaN     | NaN     | NaN     | NaN     | NaN     | 24.6132 | 25.4821 | 25.1752 | NaN     | 23.3826 | NaN     | P01344;P01344-3 | P01344;P01344-3 | Insulin-like growth factor, IGF2                   |
|     | 28.0885 | 27.6624 | 27.4548 | 28.0264 | 27.806  | 27.5799 | 25.8034 | 26.6455 | 26.2097 | 26.0704 | 26.1907 | 26.0162 | Q9Y6M1;F8W930   | Q9Y6M1;F8W930   | Insulin-like growth factor, IGF2BP2                |
|     | 27.3306 | 25.9284 | 25.9793 | 27.3716 | 26.6167 | 25.9375 | 23.6524 | 24.3799 | 23.5694 | 24.7368 | 24.6422 | 23.9515 | O00425;O00425-1 | O00425          | Insulin-like growth factor, IGF2BP3                |
|     | 27.5995 | 27.4969 | 27.3577 | 27.7707 | 27.1147 | 27.6243 | 27.7226 | 26.8361 | 26.8638 | 27.2248 | 26.8863 | 26.2484 | P11717;S4R328   | P11717          | Cation-independent growth factor, IGF2R            |
|     | 23.1115 | 23.8125 | NaN     | 22.4845 | 22.9251 | NaN     | 28.9703 | 28.1133 | 24.6989 | 23.702  | 24.2148 | 26.0689 | P08833;C9JXF9;C | P08833;C9JXF9;C | Insulin-like growth factor, IGFBP1                 |
| NaN | NaN     | 23.8573 | NaN     | NaN     | 22.2119 | NaN     | 26.8424 | 28.9593 | 28.1262 | 23.1582 | 24.3374 | 24.5214 | P17936;H0Y485;H | P17936;H0Y485;H | Insulin-like growth factor, IGFBP3                 |



|         |         |         |         |         |         |         |         |         |         |         |         |                 |                 |                            |                 |
|---------|---------|---------|---------|---------|---------|---------|---------|---------|---------|---------|---------|-----------------|-----------------|----------------------------|-----------------|
| 25.1934 | 26.7036 | 25.9568 | 25.9609 | 25.5683 | NaN     | 28.8343 | 28.0097 | 27.5591 | NaN     | NaN     | 24.3748 | P22692;P22692-2 | P22692;P22692-2 | Insulin-like growth factor | IGFBP4          |
| NaN     | NaN     | NaN     | NaN     | NaN     | NaN     | 23.8042 | NaN     | NaN     | NaN     | NaN     | NaN     | P24592;F8VYK9   | P24592;F8VYK9   | Insulin-like growth factor | IGFBP6          |
| 24.6425 | 26.6657 | 25.3176 | 23.7661 | 26.0429 | 25.6664 | 28.1604 | 28.7838 | 27.9371 | 25.6594 | 25.6345 | NaN     | Q16270;Q16270-1 | Q16270;Q16270-2 | Insulin-like growth factor | IGFBP7          |
| NaN     | 23.4799 | 23.2009 | NaN     | NaN     | NaN     | Q8WX77          | Q8WX77          | Insulin-like growth factor | IGFBPL1         |
| 22.9257 | NaN     |         | 22.7531 | 22.9735 | NaN     | NaN     | NaN     | NaN     | NaN     | 22.916  | NaN     | P38935          | P38935          | DNA-binding protein        | IGHMBP2         |
| 23.9301 | 23.5483 |         | 23.6912 | 23.8197 | NaN     | 23.7961 | NaN     | NaN     | NaN     | NaN     | NaN     | O75054;O75054-1 | O75054;O75054-2 | Immunoglobulin             | IGSF3           |
| 26.3533 | 26.8109 | 27.1152 | 26.0551 | 26.6146 | 26.9767 | 27.4148 | 27.3214 | 28.1952 | 26.4843 | 26.3695 | 27.3307 | Q969P0;Q969P0-1 | Q969P0;Q969P0-2 | Immunoglobulin             | IGSF8           |
| 24.7164 | 23.7807 | 24.1611 | 24.4285 | 24.2495 | 24.5369 | NaN     | NaN     | NaN     | 23.5364 | NaN     | NaN     | Q13123;Q9H4P6;1 | Q13123;Q9H4P6;1 | Protein                    | IK              |
| 27.6441 | 28.2425 | 27.8009 | 27.8533 | 27.8199 | 27.8073 | 27.5639 | 28.4344 | 28.4572 | 27.4054 | 27.2156 | 27.463  | Q70UQ0;Q70UQ0   | Q70UQ0;Q70UQ0   | Inhibitor of nuclear       | IKBP            |
| 27.1785 | 27.4761 | 27.1098 | 27.1977 | 27.0202 | 27.1156 | 26.8597 | 27.421  | 27.6759 | 27.1346 | 26.6133 | 26.6709 | Q70UQ0-4        | Q70UQ0-4        | Inhibitor of nuclear       | IKBP            |
| 27.3621 | 25.408  | 25.9206 | 27.0756 | 25.4155 | 26.091  | 25.2697 | 25.3537 | 23.412  | 26.3404 | 25.8833 | 24.3158 | O95163;F5H2T0;1 | O95163;F5H2T0   | Elongator complex          | IKBKAP          |
| 26.2464 | 24.3137 | 25.1351 | 26.1525 | 24.8579 | 24.9991 | 23.269  | NaN     | NaN     | 25.1375 | 24.6649 | NaN     | O14920;O14920-1 | O14920;O14920-2 | Inhibitor of nuclear       | IKBK            |
| 24.1942 | 23.867  | 23.699  | 24.0098 | 25.0372 | 24.1006 | NaN     | 24.7428 | 24.0043 | 23.142  | 23.8696 | NaN     | Q9Y6K9;A0A087X  | Q9Y6K9;A0A087X  | NF-kappa-B                 | IKBKG           |
| NaN     | NaN     | NaN     | 23.4165 | NaN     | C9J2V2          | C9J2V2          |                            | IKBKG           |
| NaN     | 22.6688 | NaN     | NaN     | Q08334;HOY3Z8;F | Q08334;HOY3Z8;F | Interleukin-10             | IL10RB          |
| NaN     | NaN     | NaN     | NaN     | NaN     | NaN     | 23.8704 | NaN     | NaN     | NaN     | NaN     | NaN     | P20809-2;K7ESD5 | P20809-2;K7ESD5 | Interleukin-11             | IL11            |
| 27.2847 | 27.4166 | 26.8577 | 27.1378 | 27.156  | 26.718  | 25.694  | NaN     | NaN     | 26.1088 | 25.3673 | 24.9875 | Q14116;Q14116-1 | Q14116;Q14116-2 | Interleukin-18             | IL18            |
| 24.0068 | NaN     | P01584;C9JVV2;C | P01584;C9JVV2;C | Interleukin-1              | beta IL1B       |
| 24.4312 | 24.311  | 25.6198 | 25.1388 | 24.5144 | 25.5716 | 23.6426 | NaN     | 24.1548 | 25.1505 | NaN     | 24.9928 | Q9NPH3;Q9NPH3   | Q9NPH3;Q9NPH3   | Interleukin-1              | receptor IL1RAP |
| 24.8185 | 25.119  | 24.5157 | 24.4122 | 24.1316 | 24.2187 | 25.3579 | 25.2967 | 25.8131 | 23.8006 | 23.83   | 24.8627 | P40189;P40189-3 | P40189;P40189-3 | Interleukin-6              | receptor IL6ST  |
| 28.5264 | 27.1564 | 27.7224 | 28.4878 | 27.4512 | 27.9005 | 26.6988 | 26.764  | 26.5013 | 27.1634 | 27.6742 | 26.758  | Q12905;B4DY09;1 | Q12905;B4DY09;1 | Interleukin                | enhancer ILF2   |
| 29.7735 | 28.8949 | 29.077  | 30.0859 | 29.3504 | 29.5778 | 27.6755 | 28.4799 | 28.2948 | 28.6043 | 29.4177 | 29.2927 | Q12906-7;Q12906 | Q12906-7;Q12906 | Interleukin                | enhancer ILF3   |
| 28.2997 | 27.8399 | 28.2611 | 28.3062 | 28.1119 | 28.4167 | 28.1915 | 27.9935 | 28.2173 | 28.4441 | 28.4694 | 28.3117 | Q13418;A0A0A0N  | Q13418;A0A0A0N  | Integrin-linked            | protein ILK     |



|         |         |         |         |         |         |         |         |         |         |         |         |                  |                  |                     |                  |                     |         |
|---------|---------|---------|---------|---------|---------|---------|---------|---------|---------|---------|---------|------------------|------------------|---------------------|------------------|---------------------|---------|
| NaN     | NaN     | NaN     | 22.0454 | NaN              | NaN              | Q9NWZ3;A0A0R4       | Q9NWZ3;A0A0R4    | Interleukin-1 rece  | IRAK4   |
| 24.9128 | 24.6853 | 24.4209 | 24.6794 | 24.7628 | 24.6003 | 24.4414 | 24.1968 | NaN     | NaN     | NaN     | 24.001  | NaN              | NaN              | P48200;A0A0A6Y      | P48200;A0A0A6Y   | Iron-responsive el  | IREB2   |
| 22.6288 | 22.5102 | 22.6771 | 22.8084 | 23.0244 | NaN     | NaN     | NaN     | NaN     | NaN     | NaN     | 22.9282 | NaN              | NaN              | Q8IU81              | Q8IU81           | Interferon regulat  | IRF2BP1 |
| 23.334  | 23.3953 | 23.5838 | 23.067  | 23.3899 | 23.6167 | 23.3546 | NaN     | NaN     | NaN     | NaN     | 23.6908 | 23.7127          | NaN              | Q9H1B7              | Q9H1B7           | Interferon regulat  | IRF2BP1 |
| 22.5598 | NaN     | NaN     | 22.2485 | NaN              | NaN              | Q14653;M0QYT9;      | Q14653;M0QYT9;   | Interferon regulat  | IRF3    |
| 24.8743 | 25.5607 | 25.2883 | 24.3625 | 25.5203 | 25.4927 | 26.8589 | 25.8036 | 25.6857 | 25.4895 | 24.8147 | 26.082  | Q8WZA9;M0QZP     | Q8WZA9           | Immunity-related    | IRGQ             |                     |         |
| 23.4069 | 23.2147 | 23.2728 | 23.3193 | 22.5959 | 23.2324 | NaN     | NaN     | NaN     | NaN     | NaN     | 22.6838 | NaN              | NaN              | Q9Y4H2              | Q9Y4H2           | Insulin receptor s  | IRS2    |
| 27.2072 | 26.962  | 27.3344 | 27.0276 | 26.8934 | 27.3947 | 28.0234 | 26.9304 | 27.3997 | 27.9243 | 27.448  | 26.7131 | P05161;A0A096L   | P05161;A0A096L   | Ubiquitin-like pro  | ISG15            |                     |         |
| 24.6713 | 25.2858 | 24.4786 | 24.0349 | 24.7129 | 24.3657 | 24.8489 | 24.5316 | 24.9809 | 24.6024 | 24.016  | 24.4111 | Q96AZ6;H0YMM4    | Q96AZ6;H0YMM4    | Interferon-stimul   | ISG20            |                     |         |
| 24.3108 | 24.8404 | 24.2185 | 24.1355 | 24.6012 | 24.5065 | 23.7503 | 23.9786 | NaN     | 23.8459 | 24.0951 | 24.4764 | Q96CN7;D6ERGE2   | Q96CN7;D6ERGE2   | Isochorismatase d   | ISOC1            |                     |         |
| 24.2076 | NaN     | 23.6777 | 23.4737 | 24.3462 | NaN     | 22.5294 | NaN     | NaN     | 23.0538 | NaN     | NaN     | Q96AB3;Q96AB3-   | Q96AB3;Q96AB3-   | Isochorismatase d   | ISOC2            |                     |         |
| 28.0354 | 28.3174 | 28.3391 | 27.563  | 27.4532 | 28.1848 | 29.2088 | 28.4979 | 29.0564 | 28.1547 | 27.7242 | 28.9358 | P53990;P53990-2; | P53990;P53990-2; | IST1 homolog        | IST1             |                     |         |
| 23.3545 | 22.6472 | 22.999  | 23.3795 | 22.5818 | 23.4855 | NaN     | NaN     | NaN     | NaN     | NaN     | 23.9562 | NaN              | NaN              | Q9ULR0-1;Q9ULR      | Q9ULR0-1;Q9ULR   | Pre-mRNA-splicing   | ISY1    |
| NaN     | 24.6205 | 25.0634 | 24.2013 | 24.9793 | NaN              | NaN              | Q9NPH2;Q9NPH2       | Q9NPH2;Q9NPH2    | Inositol-3-phosph   | ISYNA1  |
| 27.0324 | 26.4585 | 26.7811 | 26.4546 | 25.9683 | 26.3364 | 26.7821 | 25.635  | 26.5083 | 26.7613 | 26.101  | 26.2747 | Q96J02;Q96J02-2; | Q96J02;Q96J02-2; | E3 ubiquitin-prote  | ITCH             |                     |         |
| 21.6977 | NaN     | 22.5698 | 22.1124 | 22.3632 | NaN     | NaN     | NaN     | NaN     | 22.1271 | NaN     | NaN     | NaN              | NaN              | Q8TB96;H3BU11;F     | Q8TB96;H3BU11;F  | T-cell immunomor    | ITFG1   |
| 25.17   | 25.354  | 26.265  | 25.4924 | 25.2514 | 26.3253 | 25.8829 | 25.0417 | 26.0923 | 25.9868 | 25.6145 | 26.0059 | Q9H0X4;Q9H0X4-   | Q9H0X4;Q9H0X4-   | Protein ITFG3       | ITFG3            |                     |         |
| 26.2429 | 26.577  | 27.3843 | 26.4669 | 26.4266 | 27.8375 | 26.0191 | NaN     | 27.0134 | 26.3168 | 26.0022 | 26.7637 | P56199           | P56199           | Integrin alpha-1    | ITGA1            |                     |         |
| 27.6265 | 26.7366 | 27.8662 | 27.0506 | 26.9243 | 28.0671 | 27.2054 | 27.2403 | 28.1543 | 27.4048 | 27.4007 | 28.2815 | E7ESP4;E7EMF1;E  | E7ESP4;E7EMF1;E  | E9PB77              | ITGA2            |                     |         |
| 31.6525 | 32.1322 | 32.7662 | 32.0573 | 32.3957 | 32.9257 | 32.3633 | 32.0707 | 33.1788 | 32.8388 | 32.5723 | 33.2272 | P17301           | P17301           | Integrin alpha-2    | ITGA2            |                     |         |
| 31.3557 | 32.0169 | 32.4554 | 31.6611 | 31.5941 | 32.5065 | 31.6238 | 31.271  | 31.8288 | 31.7985 | 31.6735 | 31.7458 | P26006;P26006-1; | P26006;P26006-1; | Integrin alpha-3;lr | ITGA3            |                     |         |
| 27.5673 | 28.1514 | 28.185  | 28.025  | 27.8757 | 28.2034 | 27.8126 | 27.3901 | 28.2577 | 28.1355 | 27.5544 | 27.9132 | P08648;H0YIV7    | P08648           | Integrin alpha-5;lr | ITGA5            |                     |         |
| 29.8112 | 30.0496 | 30.2805 | 29.7978 | 29.5447 | 30.3048 | 28.5181 | 27.3997 | 29.017  | 28.6609 | 28.2422 | 28.5949 | P23229-2;P23229  | P23229-2;P23229  | Integrin alpha-6;lr | ITGA6            |                     |         |
| 27.7141 | 28.1919 | 28.5719 | 27.7724 | 27.9669 | 28.5935 | 27.7506 | 27.0396 | 28.0329 | 28.2681 | 27.4558 | 27.4751 | P06756;P06756-3; | P06756;P06756-3; | Integrin alpha-V;lr | ITGAV            |                     |         |
| 32.0645 | 32.1765 | 32.6102 | 31.9718 | 32.0042 | 32.6548 | 31.9472 | 31.9052 | 32.8821 | 32.1615 | 32.0351 | 32.7906 | P05556;P05556-2; | P05556;P05556-2; | Integrin beta-1     | ITGB1            |                     |         |
| 24.6795 | 25.5453 | 25.8069 | 24.7047 | 25.2648 | 25.9447 | 24.3887 | NaN     | 25.7805 | 24.7857 | 25.0644 | 25.895  | P05106;H3BM21;I  | P05106;H3BM21;I  | Integrin beta-3;lr  | ITGB3            |                     |         |
| 29.908  | 30.3918 | 30.8416 | 29.9848 | 29.8815 | 30.9866 | 26.5332 | 24.0789 | 28.6439 | 27.44   | 25.766  | 25.5126 | P16144-2;P16144  | P16144-2;P16144  | Integrin beta-4     | ITGB4            |                     |         |
| 25.3506 | 25.5737 | 26.971  | 26.2569 | 25.7991 | 27.3251 | 25.6676 | 24.9664 | 25.1081 | 26.6472 | 25.6382 | 25.627  | P18084;H7C4W1;P  | P18084;H7C4W1;P  | Integrin beta-5;lr  | ITGB5            |                     |         |
| NaN     | NaN     | NaN     | NaN     | NaN     | NaN     | 20.7198 | NaN     | NaN     | NaN     | NaN     | NaN     | NaN              | NaN              | Q8WWU7;Q8WW         | Q8WWU7;Q8WW      | Intelectin-2        | ITLN2   |
| 23.5666 | 24.0838 | 24.3192 | 23.7596 | 23.8023 | 24.1587 | NaN     | NaN     | 24.7269 | 23.6359 | NaN     | NaN     | NaN              | NaN              | Q9Y287;Q9Y287-2;    | Q9Y287;Q9Y287-2; | Integral membran    | ITM2B   |
| 22.9542 | 23.0276 | 22.7053 | 22.7025 | NaN     | NaN     | 22.8566 | NaN     | NaN     | 22.653  | NaN     | NaN     | NaN              | NaN              | Q9NQX7;C9JG41;Q     | Q9NQX7;C9JG41;Q  | Integral membran    | ITM2C   |
| 25.4315 | 25.3182 | 24.7431 | 25.02   | 25.2601 | 24.9901 | 25.3744 | NaN     | 25.7096 | 26.0506 | 26.086  | NaN     | NaN              | NaN              | Q9BY32;Q9BY32-;     | Q9BY32;Q9BY32-;  | Inosine triphosph   | ITPA    |
| NaN     | NaN     | NaN     | 23.5358 | NaN              | NaN              | Q13572;Q13572-;     | Q13572;Q13572-;  | Inositol-tetrakisph | ITPK1   |
| 25.9844 | 25.726  | 25.8725 | 26.0404 | 25.738  | 25.4823 | 26.0652 | 25.9134 | 25.3274 | 26.3078 | 25.9852 | 26.2316 | Q14573;Q14643;Q  | Q14573           | Inositol 1,4,5-tris | ITPR3            |                     |         |
| NaN     | 23.0878 | 22.956  | NaN     | 22.7806 | NaN              | NaN              | Q9NZM3;A0A087       | Q9NZM3;A0A087    | Intersectin-2       | ITSN2   |
| 27.2448 | 26.7849 | 26.6729 | 27.4805 | 26.8535 | 26.7471 | 24.825  | NaN     | 25.9676 | 26.8119 | 26.8092 | 24.618  | P26440;A0A0A0M   | P26440;A0A0A0M   | Isovaleryl-CoA del  | IVD              |                     |         |
| NaN     | NaN     | NaN     | 21.4802 | NaN     | 21.7272 | NaN              | NaN              | Q96ST2;Q96ST2-2     | Q96ST2;Q96ST2-2  | Protein IWS1 hom    | IWS1    |
| 23.386  | 23.2724 | 23.3807 | NaN     | NaN     | NaN     | NaN     | NaN     | NaN     | 24.4595 | NaN     | NaN     | NaN              | NaN              | P78504;P78504-2     | P78504;P78504-2  | Protein jagged-1    | JAG1    |
| 23.6877 | NaN     | 24.2788 | 24.3941 | NaN     | NaN     | NaN     | NaN     | NaN     | 25.2868 | 24.8696 | 23.8078 | Q8N5M9;A0A087    | Q8N5M9;A0A087    | Protein jagged1 hc  | JAGN1            |                     |         |
| 26.4867 | 26.9506 | 27.3464 | 26.2127 | 25.8329 | 26.9035 | 26.4729 | 24.4884 | 26.8555 | 26.612  | 25.1651 | 25.058  | P23458;O60674    | P23458           | Tyrosine-protein k  | JAK1             |                     |         |
| 23.4852 | NaN     | NaN     | 23.5885 | NaN     | 22.6238 | NaN     | NaN     | NaN     | NaN     | NaN     | 22.5679 | NaN              | NaN              | Q6NYC1;B2WTI3;I     | Q6NYC1;B2WTI3;I  | Bifunctional argini | JMJD6   |
| 23.3703 | NaN              | NaN              | Q8N9B5;Q8N9B5-      | Q8N9B5;Q8N9B5-   | Junction-mediatin   | JMY     |
| 23.3581 | NaN     | 22.3924 | 23.4253 | 22.8659 | NaN              | NaN              | P05412;P17535       | P05412           | Transcription fact  | JUN     |
| 24.513  | 25.1256 | 25.747  | 25.5992 | 25.5688 | 26.1488 | 26.7437 | 24.9142 | 25.5875 | 25.9661 | 25.401  | 24.4087 | P14923;C9JTX4;C  | P14923           | Junction plakoglol  | JUP              |                     |         |
| NaN     | NaN     | NaN     | NaN     | NaN     | NaN     | 22.4245 | NaN     | NaN     | NaN     | NaN     | NaN     | NaN              | NaN              | P23352;A0A087W      | P23352;A0A087W   | Anosmin-1           | KAL1    |
| 20.9613 | NaN              | NaN              | Q63ZY3;Q63ZY3-2     | Q63ZY3;Q63ZY3-2  | KN motif and ank    | KANK2   |
| 28.7608 | 28.5317 | 28.4421 | 28.4273 | 28.5533 | 28.4321 | 29.044  | 29.2163 | 28.6501 | 29.1761 | 29.2295 | 28.7833 | Q15046;Q15046-;  | Q15046;Q15046-;  | Lysine--tRNA ligas  | KARS             |                     |         |
| NaN     | NaN     | NaN     | 22.6251 | NaN              | NaN              | O95251;O95251-;     | O95251;O95251-;  | Histone acetyltrar  | KAT7    |
| 23.5642 | NaN     | NaN     | 23.9562 | NaN              | NaN              | Q9H7Z6;Q9H7Z6-      | Q9H7Z6;Q9H7Z6-   | Histone acetyltrar  | KAT8    |
| 23.3362 | 23.1279 | 22.7047 | 23.0151 | 23.0394 | NaN     | NaN     | NaN     | NaN     | 22.9398 | 22.92   | NaN     | O75449;O75449-2  | O75449;O75449-2  | Katanin p60 ATPa:   | KATNA1           |                     |         |
| NaN     | NaN     | NaN     | NaN     | NaN     | NaN     | 27.1787 | NaN     | NaN     | NaN     | NaN     | NaN     | NaN              | NaN              | Q8IYT4;K7EM02;K     | Q8IYT4;K7EM02;K  | Katanin p60 ATPa:   | KATNAL2 |
| 22.9195 | NaN     | 22.0011 | 22.28   | NaN     | 22.0202 | NaN              | NaN              | Q9BVA0;H3BT67;I     | Q9BVA0           | Katanin p80 WD4     | KATNB1  |
| NaN     | 21.0766 | NaN     | NaN     | NaN              | NaN              | Q8IY47;A0A087W      | Q8IY47;A0A087W   | Kelch repeat and I  | KBTBD2  |
| NaN     | NaN     | NaN     | 23.5822 | NaN              | NaN              | Q9PJ07;C9J3I2       | Q9PJ07;C9J3I2    | E3 ubiquitin-prote  | KCMF1   |
| 24.6948 | 25.4868 | 25.3682 | 25.2142 | 25.624  | 25.5684 | 25.8191 | 26.2642 | 25.9591 | 25.8295 | 26.046  | 26.0497 | Q13303-2;Q1330;  | Q13303-2;Q1330;  | Voltage-gated pot   | KCNAB2           |                     |         |
| NaN     | NaN     | 22.8776 | 21.9543 | 22.2456 | NaN     | NaN     | NaN     | 22.4837 | 23.4857 | 22.4276 | NaN     | O15554;D1MQ08    | O15554;D1MQ08    | Intermediate conr   | KCNN4            |                     |         |
| 22.8878 | NaN     | 23.2365 | 22.9757 | 22.8666 | 23.1977 | NaN     | NaN     | 24.0708 | 22.5305 | NaN     | NaN     | Q8NC54           | Q8NC54           | Keratinocyte-asso   | KCT2             |                     |         |
| 20.1951 | NaN     | F5GWA4           | F5GWA4           |                     | KCTD10           |                     |         |
| 24.8858 | 24.7295 | 24.4748 | 24.8024 | 24.8891 | 24.5083 | 24.9061 | NaN     | NaN     | 25.547  | 25.1491 | NaN     | Q9H3F6;Q9H3F6-   | Q9H3F6;Q9H3F6-   | BTB/POZ domain-     | KCTD10           |                     |         |
| 25.4676 | 25.5984 | 25.4705 | 25.2952 | 25.2427 | 25.6913 | 25.6603 | 25.6089 | 25.2914 | 25.6334 | 25.4438 | 25.8865 | Q96CX2           | Q96CX2           | BTB/POZ domain-     | KCTD12           |                     |         |



|     |         |         |         |         |         |         |         |         |         |         |         |         |                                                               |
|-----|---------|---------|---------|---------|---------|---------|---------|---------|---------|---------|---------|---------|---------------------------------------------------------------|
|     | 25.0584 | 24.2251 | 24.7317 | 25.1207 | 24.3389 | 24.9548 | 23.4948 | 24.2593 | 23.5733 | 24.0409 | 23.9118 | 24.0973 | Q9BQ13;Q9BQ13-Q9BQ13;Q9BQ13-BTB/POZ domain- KCTD14            |
|     | 23.8827 | 24.101  | 23.982  | 24.2314 | 24.2924 | 24.3908 | 24.145  | 25.4252 | NaN     | 24.0844 | 24.7548 | NaN     | Q9NXV2;H3B5S5 Q9NXV2 BTB/POZ domain- KCTD5                    |
| NaN | NaN     | NaN     | NaN     | 20.8682 | NaN     | Q7L273 Q7L273 BTB/POZ domain- KCTD9                           |
|     | 22.6414 | 23.775  | 23.4201 | NaN     | 23.7999 | 23.8103 | 23.9895 | NaN     | 24.2917 | 23.638  | 23.6025 | 23.5575 | Q7Z4H8;Q7Z4H8-Q7Z4H8;Q7Z4H8-KDEL motif-contai KDEL C2         |
|     | 23.944  | NaN     | 23.7012 | 24.1089 | 23.8169 | 23.85   | NaN     | NaN     | NaN     | 23.8194 | 24.5878 | NaN     | O60341;O60341-2 O60341;O60341-2 Lysine-specific his KDM1A     |
|     | 21.741  | NaN     | Q9Y2K7;Q9Y2K7-Q9Y2K7;Q9Y2K7-5 Lysine-specific dei KDM2A       |
|     | 21.5371 | NaN     | NaN     | 21.9482 | NaN     | Q7LBC6;Q7LBC6-Q7LBC6;Q7LBC6-3 Lysine-specific dei KDM3B       |
|     | 22.2876 | NaN     | NaN     | NaN     | 23.0486 | NaN     | 22.729  | NaN     | NaN     | 22.5501 | NaN     | NaN     | Q06136;K7EQ57;K Q06136;K7EQ57;K 3-ketodihydrosph KDSR         |
|     | 28.6736 | 26.9118 | 27.5951 | 26.298  | 24.554  | 26.7514 | 28.0179 | 28.7106 | 31.1026 | 27.6634 | 28.2872 | 30.2408 | Q14145;K7E5E0;K Q14145 Kelch-like ECH-ass KEAP1               |
|     | 28.0174 | 28.2554 | 27.9081 | 28.1393 | 28.3578 | 28.1561 | 26.9459 | 27.6845 | 27.3314 | 28.1062 | 28.6445 | 28.254  | Q07666;Q07666-Q07666;Q07666-3 KH domain-contai KHDRB51        |
| NaN | NaN     | NaN     | NaN     | NaN     | 23.2209 | NaN     | P50053-2;P50053 P50053-2;P50053; Ketohehexokinase KHK         |
|     | 28.9202 | 29.1441 | 29.1057 | 29.0897 | 29.3736 | 29.3377 | 28.5692 | 29.0722 | 28.7541 | 29.252  | 29.8319 | 29.9925 | Q92945;A0A087W Q92945;A0A087W Far upstream eler KHSRP         |
|     | 27.5088 | 25.458  | 26.7162 | 27.6357 | 26.3745 | 26.6378 | 24.9188 | NaN     | NaN     | 25.9876 | 26.4153 | 24.3254 | Q15397;S4R3K8 Q15397 Pumilio domain-c KIAA0020                |
|     | 25.0088 | 23.8773 | 24.4776 | 25.3782 | 24.2537 | 24.0031 | 23.4605 | NaN     | 24.4585 | 24.1123 | 23.449  | 24.0714 | Q12768;E7EQ17;E Q12768;E7EQ17 WASH complex su KIAA0196        |
| NaN | NaN     | NaN     | NaN     | NaN     | 22.0508 | NaN     | Q92628 Q92628 Uncharacterized p KIAA0232                      |
|     | 24.5244 | 24.8206 | 24.7336 | 24.5467 | 24.9032 | 25.1114 | 24.5174 | 25.6037 | 25.8341 | 24.832  | 24.5875 | 24.7819 | Q81ZA0;E7EN73;Q Q81ZA0;E7EN73;Q Dyslexia-associate KIAA0319L  |
|     | 22.3444 | NaN     | NaN     | 22.6768 | NaN     | O15091;O15091-2 O15091;O15091-2 Mitochondrial rib KIAA0391    |
| NaN | NaN     | NaN     | NaN     | 20.2652 | NaN     | Q9Y4F3;Q9Y4F3-5 Q9Y4F3;Q9Y4F3-5 Meiosis arrest fen KIAA0430   |
|     | 25.1684 | 24.2817 | 24.5403 | 25.4156 | 24.0282 | 24.8273 | 24.1776 | 24.4793 | 23.5643 | 24.1972 | 23.3669 | 23.0996 | Q2M389;A0A087W Q2M389;A0A087W WASH complex su KIAA1033        |
|     | 27.3408 | 26.3407 | 26.572  | 26.8226 | 26.1607 | 26.6495 | 26.3131 | 26.0506 | 25.9568 | 27.6546 | 27.0247 | 26.7159 | Q96EK5;A0A0D9S Q96EK5 KIF1-binding proti KIAA1279             |
| NaN | NaN     | NaN     | NaN     | 23.7848 | NaN     | Q69YN4;Q69YN4-Q69YN4;Q69YN4- Protein virilizer hc KIAA1429    |
|     | 24.1963 | 23.3941 | 24.0304 | 24.449  | 23.642  | 24.1547 | NaN     | NaN     | NaN     | 23.9001 | 23.9263 | NaN     | A2RU67;Q69YM1 A2RU67;Q69YM1 Uncharacterized p KIAA1467;DKFZp7 |
|     | 19.6863 | NaN     | Q9P260;A0A075B Q9P260;A0A075B LisH domain and t KIAA01468     |
| NaN | NaN     | NaN     | 21.3055 | NaN     | Q9P206-2;Q9P206 Q9P206-2;Q9P206 Uncharacterized p KIAA1522    |
|     | 26.4287 | 25.0865 | 25.2509 | 26.2596 | 25.3427 | 25.5949 | 24.6121 | NaN     | 24.5253 | 25.5491 | 25.7258 | 25.4345 | Q8TCG1;A0A087X Q8TCG1;A0A087X Protein CIP2A KIAA1524          |
|     | 23.3561 | 24.3305 | 24.0068 | 23.5829 | 24.6234 | 23.5477 | NaN     | NaN     | NaN     | NaN     | 23.3817 | NaN     | A0MZ66;A0MZ66 A0MZ66;A0MZ66 Shootin-1 KIAA1598                |
|     | 22.4247 | NaN     | 22.5794 | NaN     | NaN     | NaN     | NaN     | NaN     | 22.4916 | NaN     | NaN     | NaN     | Q8IYS2;Q8IYS2-2 Q8IYS2;Q8IYS2-2 Uncharacterized p KIAA2013    |
|     | 23.5381 | 23.0475 | 23.5563 | 23.5732 | 23.2235 | 23.1895 | 23.383  | NaN     | 23.6583 | 24.1642 | 23.1827 | 24.0834 | Q9ULH0;Q9ULH0-Q9ULH0;Q9ULH0 Kinase D-interacti KIDINS220      |
|     | 27.0681 | 27.3469 | 26.8367 | 26.7704 | 27.5995 | 26.8894 | 26.7652 | 27.4396 | 27.3355 | 26.9488 | 27.3007 | 27.2925 | P52732 P52732 Kinesin-like protei KIF11                       |
|     | 25.3157 | 24.1026 | 24.9102 | 24.8165 | 24.5444 | 24.6593 | 23.6917 | NaN     | NaN     | 24.0838 | 23.5249 | 23.8159 | Q9NQT8;E7ERX9;I Q9NQT8;E7ERX9 Kinesin-like protei KIF13B      |
|     | 28.3183 | 28.1191 | 28.8967 | 28.2726 | 27.8124 | 28.6534 | 30.6545 | 29.8056 | 29.65   | 28.8194 | 28.0592 | 28.4202 | Q15058 Q15058 Kinesin-like protei KIF14                       |
|     | 24.8869 | 23.2855 | 23.5413 | 23.5118 | 23.0073 | NaN     | 24.1813 | 24.249  | 23.4079 | NaN     | 23.4358 | 23.3869 | Q9NS87;Q9NS87-Q9NS87;Q9NS87- Kinesin-like protei KIF15        |
| NaN | NaN     | NaN     | 20.7054 | 21.6759 | NaN     | Q96L93;Q96L93-5 Q96L93;Q96L93-5 Kinesin-like protei KIF16B    |
| NaN | NaN     | NaN     | NaN     | NaN     | NaN     | NaN     | NaN     | NaN     | NaN     | NaN     | NaN     | 24.1077 | Q12756;Q12756-Q12756;Q12756-3 Kinesin-like protei KIF1A       |
|     | 21.1693 | NaN     | O60333-2;O60333 O60333-2;O60333 Kinesin-like protei KIF1B     |
|     | 24.4109 | 23.782  | 23.9727 | 23.8844 | 23.8994 | 23.7131 | 23.7957 | 24.1608 | NaN     | 24.0918 | NaN     | NaN     | O43896 O43896 Kinesin-like protei KIF1C                       |
|     | 26.3959 | 26.3932 | 26.7075 | 26.9713 | 26.563  | 26.8809 | 28.5859 | 28.1587 | 28.3099 | 27.4328 | 27.501  | 27.2962 | O95235;O95235-Q95235;O95235-2 Kinesin-like protei KIF20A      |
|     | 26.852  | 28.23   | 27.6543 | 27.6301 | 28.2421 | 27.5745 | 29.0013 | 28.6859 | 28.9938 | 27.5362 | 28.238  | 28.8963 | Q96Q89;Q96Q89-Q96Q89;Q96Q89- Kinesin-like protei KIF20B       |
|     | 23.3613 | NaN     | 23.1015 | 23.8007 | 22.8915 | 23.2177 | 23.2407 | NaN     | NaN     | NaN     | NaN     | NaN     | Q7Z4S6;Q7Z4S6-5 Q7Z4S6;Q7Z4S6-5 Kinesin-like protei KIF21A    |
|     | 20.514  | NaN     | NaN     | 21.093  | NaN     | Q14807;H3BTH5;I Q14807;H3BTH5;I Kinesin-like protei KIF22     |
|     | 30.4338 | 30.4743 | 30.943  | 30.3826 | 29.9538 | 30.7871 | 32.7996 | 31.9387 | 31.7875 | 31.2375 | 30.4695 | 30.899  | Q02241;H7BYN4;I Q02241;H7BYN4 Kinesin-like protei KIF23       |
|     | 23.2218 | 23.003  | 23.3101 | 23.0196 | 22.636  | 23.3363 | 25.1655 | 24.6731 | 24.6492 | 22.7118 | 21.5013 | 23.8151 | Q02241-2 Q02241-2 Kinesin-like protei KIF23                   |
|     | 23.8832 | 23.7743 | NaN     | 23.6233 | NaN     | Q02241-3 Q02241-3 Kinesin-like protei KIF23                   |
|     | 26.7256 | 25.7273 | 25.8546 | 26.0268 | 25.509  | 25.3166 | 27.1458 | 26.9078 | 26.7332 | 25.5479 | 25.6797 | 25.9915 | O00139-2;O00139 O00139-2;O00139 Kinesin-like protei KIF2A     |
|     | 27.3231 | 26.4344 | 26.5348 | 26.7965 | 26.661  | 26.2831 | 26.5325 | 26.7997 | 26.7304 | 27.3284 | 27.1855 | 26.8105 | Q99661;Q99661-Q99661;Q99661-2 Kinesin-like protei KIF2C       |
|     | 25.5605 | 24.8666 | 25.3781 | 25.4288 | 25.4249 | 24.842  | 25.0839 | NaN     | NaN     | 24.8386 | NaN     | NaN     | Q9Y496;J3KPF9;A Q9Y496;J3KPF9;A Kinesin-like protei KIF3A     |
|     | 26.2484 | 26.2599 | 26.1894 | 25.9438 | 25.901  | 25.7699 | 25.3115 | NaN     | 26.1485 | 25.2511 | 25.5275 | 25.2448 | O15066;O15066-2 O15066 Kinesin-like protei KIF3B              |
|     | 26.9872 | 26.6488 | 27.0858 | 26.6185 | 26.0606 | 26.4557 | 28.1754 | 27.4435 | 28.2724 | 26.9125 | 26.3706 | 26.8742 | O95239;O95239-Q95239;O95239-2 Chromosome-ass KIF4A            |
|     | 30.3562 | 29.9649 | 30.0338 | 30.1162 | 29.8765 | 29.9053 | 30.1283 | 30.3437 | 29.9459 | 30.3997 | 30.2463 | 29.8467 | P33176;Q12840;I P33176 Kinesin-1 heavy c KIF5B                |
|     | 22.5737 | 21.7546 | 22.4728 | 22.118  | 21.78   | 21.6525 | 22.134  | NaN     | NaN     | NaN     | NaN     | NaN     | Q92845;Q92845-Q92845;Q92845-2 Kinesin-associater KIFAP3       |
|     | 25.8772 | 25.3683 | 25.2535 | 25.6817 | 25.6526 | 25.3183 | NaN     | 25.1178 | 24.6147 | 25.7276 | 26.2347 | 25.8321 | Q9BW19;A0A087 Q9BW19 Kinesin-like protei KIFC1                |
|     | 24.6599 | 24.8589 | 25.828  | 25.3955 | 25.3826 | 25.9768 | 25.0088 | 24.2286 | 25.12   | 25.9384 | 25.5731 | 25.7624 | Q96J84;B4DN67;C Q96J84;B4DN67;C Kin of IRRE-like pr KIRREL    |
|     | 23.2663 | 24.7131 | 24.3507 | NaN     | 23.9675 | 23.1689 | 25.6548 | 27.2814 | NaN     | NaN     | NaN     | NaN     | Q15726;A0A0D9S Q15726;A0A0D9S Metastasis-suppr KISS1          |
|     | 27.366  | 26.7098 | 26.5239 | 26.9949 | 26.5708 | 26.3038 | 26.7674 | 26.6281 | 26.2203 | 26.8003 | 26.477  | 25.217  | Q07866-4;Q07866 Q07866-4;Q07866 Kinesin light chain KLC1      |
|     | 26.9862 | 27.2541 | 26.8225 | 26.775  | 27.0838 | 26.8564 | 27.4179 | 28.0981 | 27.6722 | 27.0758 | 27.3892 | 27.6121 | Q9H0B6;Q9H0B6-Q9H0B6;Q9H0B6- Kinesin light chain KLC2         |
|     | 23.7375 | 24.0624 | 24.1181 | 23.0884 | 23.94   | 23.8619 | 23.3178 | 24.6611 | NaN     | 23.2203 | 23.6025 | 23.6532 | Q9NSK0;Q9NSK0-Q9NSK0;Q9NSK0- Kinesin light chain KLC4         |
| NaN | NaN     | NaN     | 23.2536 | NaN     | Q03164;Q03164-Q03164;Q03164-2 Histone-lysine N-r KMT2A        |
|     | 24.721  | 24.444  | 23.8534 | 24.3082 | 23.7211 | 24.057  | NaN     | NaN     | NaN     | 24.0074 | 23.8224 | NaN     | Q9Y448;V9GY01;C Q9Y448;V9GY01 Small kinetochore KNSTRN        |
|     | 26.0893 | 25.1954 | 25.2513 | 25.7464 | 24.9469 | 25.425  | 25.3163 | 24.6242 | 24.9668 | 25.4425 | 25.3426 | 24.6805 | P50748;E7ES84;P P50748;E7ES84 Kinetochore-assor KNTC1         |
|     | 25.8954 | 25.099  | 25.4873 | 25.9729 | 25.3145 | 25.9043 | 25.6323 | 25.9637 | 24.8731 | 25.1596 | 25.7294 | 25.4631 | P52294;C9JY14;C9 P52294;C9JY14 Importin subunit i KPNA1       |



|     |         |         |         |         |         |         |         |         |         |         |         |         |                  |                  |                            |
|-----|---------|---------|---------|---------|---------|---------|---------|---------|---------|---------|---------|---------|------------------|------------------|----------------------------|
|     | 29.0113 | 28.8568 | 29.0269 | 29.0744 | 29.3065 | 29.1474 | 28.3848 | 28.2678 | 28.3891 | 28.7744 | 29.1042 | 29.2625 | P52292;J3QLL0;J3 | P52292;J3QLL0;J3 | Importin subunit : KPNA2   |
|     | 24.8614 | 25.0893 | 24.8713 | 24.7942 | 24.8074 | 25.0867 | 25.0535 | 26.1377 | NaN     | 24.1988 | 24.554  | 24.8497 | O00505;H0Y4S9    | O00505           | Importin subunit : KPNA3   |
|     | 25.7248 | 25.431  | 25.978  | 25.7128 | 25.7166 | 25.8198 | 26.1015 | NaN     |         | 26.182  | 25.5979 | 25.7507 | O00629;H7C4F6    | O00629           | Importin subunit : KPNA4   |
|     | 26.5434 | 26.2859 | 26.4968 | 26.6421 | 26.4666 | 26.3919 | 26.0734 | 26.2438 | 26.2668 | 26.3968 | 26.4796 | 26.4865 | O60684;Q5TF17;S  | O60684;Q5TF17    | Importin subunit : KPNA6   |
|     | 31.4874 | 30.9259 | 31.5141 | 31.1651 | 30.9448 | 31.5404 | 31.4576 | 31.6603 | 31.3561 | 31.0619 | 31.2427 | 31.597  | Q14974;Q14974-2  | Q14974;Q14974-2  | Importin subunit : KPNA1   |
| NaN | NaN     | NaN     | NaN     | 23.4646 | NaN     | NaN     | NaN     | 25.4376 | NaN     | NaN     | NaN     | NaN     | Q5T749           | Q5T749           | Keratinocyte prol KRPR     |
|     | 26.5362 | 26.2988 | 26.4819 | 26.3646 | 26.2531 | 26.8495 | 27.0539 | 26.1586 | 26.9851 | 28.031  | 27.4757 | 27.5958 | P01116-2         | P01116-2         | GTPase KRas;GTP: KRAS      |
|     | 24.93   | 24.0096 | 24.2617 | 25.1028 | 24.1445 | 24.5281 | NaN     | NaN     | NaN     | 23.5897 | 22.9169 | NaN     | Q13601;A0A087V   | Q13601;A0A087V   | KRR1 small subun KRR1      |
|     | 29.2071 | 30.5222 | 29.7178 | 29.8752 | 30.5854 | 30.0276 | 29.8862 | 31.0247 | 30.2785 | 30.0571 | 29.9983 | 29.7133 | P05783;F8VZY9;C  | P05783;F8VZY9    | Keratin, type I cyt KRT18  |
|     | 29.1533 | 31.1606 | 29.5864 | 29.1871 | 30.571  | 28.7719 | 31.2756 | 32.0618 | 31.3221 | 28.7698 | 30.7274 | 30.1425 | P35908           | P35908           | Keratin, type II cyt KRT2  |
|     | 22.8787 | NaN     | NaN     | 25.678  | NaN     | NaN     |         | 26.136  | NaN     | NaN     | NaN     | NaN     | P04259           | P04259           | Keratin, type II cyt KRT6B |
|     | 23.1837 | 22.8746 | 23.1339 | 23.4418 | 22.9781 | 23.3283 | NaN     | NaN     | NaN     | 23.4333 | 23.7438 | NaN     | Q96EK9           | Q96EK9           | Protein KTI12 hon KTI12    |
|     | 29.6218 | 30.2632 | 29.3372 | 29.1636 | 29.6155 | 29.0504 | 28.5987 | 29.3835 | 28.0513 | 27.7619 | 28.0019 | 26.949  | Q86UP2;Q86UP2-   | Q86UP2;Q86UP2-   | Kinectin KTN1              |
|     | 23.0806 | 23.3084 | 23.4383 | 22.4616 | 23.2453 | 23.4994 | 23.1135 | NaN     |         | 23.7996 | NaN     | 22.8715 | Q16719;Q16719-2  | Q16719;Q16719-2  | Kynureninase KYN1          |
|     | 25.9449 | 27.204  | 27.0385 | 25.888  | 26.794  | 26.9416 | 26.1836 | 25.8641 | 25.4828 | 25.5917 | 25.0616 | NaN     | P32004;P32004-2  | P32004;P32004-2  | Neural cell adhesi L1CAM   |
|     | 22.6118 | 22.0992 | 22.3134 | 22.825  | 22.3838 | 22.765  | NaN     | NaN     | NaN     | NaN     | NaN     | NaN     | Q9H9P8;C9JVN9;C  | Q9H9P8;C9JVN9;C  | L-2-hydroxyglutar L2HGDH   |
| NaN |         | 22.8504 | NaN     | Q96EM0;D6RC46;   | Q96EM0;D6RC46;   | Trans-3-hydroxy-L L3HYPDH  |
|     | 22.9423 | 23.4154 | 22.8416 | 23.5386 | 23.6827 | 23.3352 | 23.5595 | 23.5157 | 23.5886 | 23.0802 | NaN     | NaN     | P83111;P83111-2  | P83111           | Serine beta-lactar LACTB   |
|     | 24.8748 | 25.1034 | 24.8455 | 24.767  | NaN     | 24.6733 | 25.7171 | NaN     | NaN     | 25.9453 | 25.3065 | NaN     | Q53H82           | Q53H82           | Beta-lactamase-III LACTB2  |
| NaN | NaN     | NaN     | NaN     | 24.2971 | NaN     | Q14657           | Q14657           | EKC/KEOPS compl LAGE3      |
| NaN | NaN     | NaN     | NaN     | NaN     | NaN     | NaN     |         | 25.1953 | NaN     | NaN     | NaN     | NaN     | Q16363;A0A0A0N   | Q16363;A0A0A0N   | Laminin subunit a LAMA4    |
|     | 26.2208 | 25.9696 | 26.2027 | 25.226  | 24.975  | 25.7345 | 28.0446 | 27.0861 | 26.3174 | 25.9543 | 25.9585 | 25.1369 | O15230;O15230-2  | O15230           | Laminin subunit a LAMA5    |
|     | 22.7755 | 23.3358 | 22.7511 | 21.3095 | 23.2811 | 22.9594 | 27.528  | 26.3653 | 25.1386 | 24.7075 | 24.5483 | 22.4561 | P07942;G3XAI2;E  | P07942;G3XAI2    | Laminin subunit b LAMB1    |
|     | 23.1342 | 23.7213 | 23.3736 | 22.7771 | 23.6583 | 23.1854 | 25.7768 | 22.1236 | 23.56   | 22.5266 | 23.6529 | 22.6998 | P55268;F5H520;A  | P55268           | Laminin subunit b LAMB2    |
|     | 24.6629 | 25.5722 | 24.9175 | 24.6637 | 24.9806 | 24.7442 | 27.0321 | 26.1435 | 26.6938 | 26.2352 | 25.0738 | 25.0056 | P13751;X1WI29;C  | Q13751           | Laminin subunit b LAMB3    |
|     | 24.8314 | 25.6595 | 25.2981 | 24.1546 | 24.5957 | 24.1045 | 27.6085 | 26.6244 | 26.0829 | 25.3122 | 25.4221 | 25.3826 | P11047           | P11047           | Laminin subunit g LAMC1    |
|     | 24.4035 | 25.2807 | 23.7726 | 23.8883 | 24.6222 | 22.4892 | 28.5201 | 26.8264 | 27.394  | 25.3469 | 23.4255 | 25.6679 | Q13753;Q13753-2  | Q13753;Q13753-2  | Laminin subunit g LAMC2    |
|     | 28.9247 | 29.9544 | 29.6707 | 29.273  | 29.3282 | 29.7184 | 29.2098 | 28.715  | 29.5786 | 29.4128 | 29.1482 | 29.569  | P11279;P11279-2  | P11279;P11279-2  | Lysosome-associa LAMP1     |
|     | 25.4666 | 26.3693 | 26.1367 | 26.0445 | 25.4669 | 26.2833 | 26.2472 | 25.341  | 25.7192 | 25.7799 | 24.9227 | 25.3077 | P13473-2;P13473; | P13473-2;P13473; | Lysosome-associa LAMP2     |
|     | 26.5541 | 26.7149 | 26.7229 | 25.9986 | 26.0498 | 26.0031 | 25.4239 | 25.7856 | 26.5132 | 25.1556 | 24.918  | 26.0134 | Q6IAA8;F5GX19;F  | Q6IAA8;F5GX19;F  | Regulator comple LAMTOR1   |
|     | 24.0966 | 24.2065 | NaN     | 23.2485 | NaN     | Q9Y2Q5;Q9Y2Q5-   | Q9Y2Q5;Q9Y2Q5-   | Regulator comple LAMTOR2   |
|     | 24.5267 | 25.123  | 24.3898 | 23.9849 | 23.8411 | 23.6459 | 24.012  | 23.4038 | NaN     | NaN     | NaN     | NaN     | Q9UHA4;Q9UHA4    | Q9UHA4           | Regulator comple LAMTOR3   |
|     | 23.2881 | 23.9328 | 22.8638 | NaN     | 23.264  | NaN     | Q0VGL1;A0A087V   | Q0VGL1;A0A087V   | Regulator comple LAMTOR4   |
|     | 24.4235 | 25.3783 | 24.5122 | 24.1413 | 24.5454 | 24.2611 | 24.6676 | NaN     | NaN     | 23.9532 | NaN     | 24.3529 | O43504;R4GMU8    | O43504;R4GMU8    | Regulator comple LAMTOR5   |
|     | 25.3588 | 25.0498 | 25.2565 | 25.3435 | 24.6367 | 25.3518 | 26.0023 | NaN     | 25.578  | 26.0026 | 25.6122 | 25.4531 | O43813;E9PH50;F  | O43813;E9PH50;F  | LanC-like protein : LANCL1 |
|     | 24.4705 | 23.268  | NaN     | 23.7871 | NaN     | 23.7412 | NaN     | NaN     | NaN     | 23.5241 | 23.1656 | NaN     | Q9NS86           | Q9NS86           | LanC-like protein : LANCL2 |
|     | 28.5577 | 28.5522 | 28.3858 | 28.434  | 28.5887 | 28.486  | 28.5138 | 28.5096 | 28.7349 | 28.6721 | 28.522  | 28.8617 | P28838-2;P28838  | P28838-2;P28838  | Cytosol aminopep LAP3      |
| NaN | NaN     | NaN     | 24.2638 | 24.0266 | NaN     | 24.3332 | NaN     | NaN     | NaN     | NaN     | NaN     | NaN     | Q15012           | Q15012           | Lysosomal-associ LAPTMA4   |
| NaN | NaN     | NaN     | NaN     | 23.2386 | NaN     | Q13571           | Q13571           | Lysosomal-associ LAPTMS    |
|     | 28.6633 | 28.1579 | 28.2043 | 28.4639 | 27.9962 | 27.8198 | 26.8494 | 27.8716 | 25.4078 | 27.2134 | 26.9466 | 27.7758 | Q6PKG0;Q6PKG0-   | Q6PKG0;Q6PKG0-   | La-related protein LARP1   |
|     | 25.1354 | NaN     | 23.8561 | 24.4099 | 23.1569 | NaN     | Q71RC2;Q96J85;C  | Q71RC2;Q96J85;C  | La-related protein LARP4   |
|     | 25.0421 | 24.7849 | 24.0335 | 24.9259 | 24.2612 | 24.4565 | NaN     | NaN     | NaN     | 23.6961 | 23.7659 | NaN     | Q92615;H0Y641;F  | Q92615           | La-related protein LARP4B  |
|     | 22.6965 | NaN     | 23.0308 | 23.8525 | NaN     | NaN     | NaN     | NaN     | 24.3132 | NaN     | NaN     | 24.2724 | Q9BR58;Q9BR58-   | Q9BR58           | La-related protein LARP6   |
|     | 23.4182 | NaN     | 23.1842 | 23.4742 | 23.7304 | NaN     | NaN     | NaN     | NaN     | NaN     | 23.585  | 23.0082 | Q4G0J3;D6RFF0;C  | Q4G0J3;D6RFF0;C  | La-related protein LARP7   |
|     | 30.7288 | 29.467  | 29.7677 | 30.5097 | 29.8145 | 29.8375 | 29.2285 | 29.5279 | 29.3101 | 29.8796 | 29.6585 | 29.2608 | Q9P2J5;Q9P2J5-2  | Q9P2J5;Q9P2J5-2  | Leucine--tRNA lig: LARS    |
|     | 21.9288 | NaN     | Q15031;E9PHM2    | Q15031;E9PHM2    | Probable leucine-- LARS2   |
|     | 25.9891 | 23.4007 | 25.3899 | 26.2586 | 24.9336 | 25.1392 | NaN     | NaN     | NaN     | 24.5947 | 24.4755 | 24.1391 | Q9Y4W2;Q9Y4W2    | Q9Y4W2;Q9Y4W2    | Ribosomal biogen LAS1L     |
|     | 29.4394 | 30.3952 | 29.7414 | 29.1233 | 30.0888 | 29.8083 | 29.2114 | 29.6601 | 29.2569 | 28.9807 | 28.8851 | 29.6023 | Q14847;Q14847-2  | Q14847;Q14847-2  | LIM and SH3 dom LASP1      |
|     | 24.9659 | 25.3371 | 25.6534 | 24.8114 | 25.3328 | 25.9542 | NaN     | NaN     | NaN     | NaN     | 22.8964 | NaN     | Q9GZY6;C9JA24;C  | Q9GZY6;C9JA24;C  | Linker for activati LAT2   |
| NaN | NaN     | NaN     | NaN     | NaN     | NaN     | NaN     | 22.5524 | NaN     | NaN     | NaN     | NaN     | NaN     | Q6UX15;Q6UX15-   | Q6UX15;Q6UX15-   | Layilin LAYN               |
|     | 23.2277 | NaN     | 22.7138 | 23.2565 | NaN     | NaN     | NaN     | NaN     | NaN     | 22.4847 | 22.9902 | NaN     | Q14739;C9JXK0;C  | Q14739;C9JXK0    | Lamin-B receptor LBR       |
| NaN | NaN     | NaN     | 22.0649 | 25.1324 | 23.4478 | NaN     | 22.9416 | NaN     | NaN     | NaN     | NaN     | NaN     | Q6UWP7;Q6UWP     | Q6UWP7;Q6UWP     | Lysocardiolipin ac LCLAT1  |
| NaN | NaN     | NaN     | 23.0805 | 22.3906 | NaN     | NaN     | NaN     | NaN     | NaN     | NaN     | 23.4911 | NaN     | Q9UIC8;Q9UIC8-3  | Q9UIC8;Q9UIC8-3  | Leucine carboxyl r LCMT1   |
|     | 24.2052 | NaN     | 23.4344 | 23.7764 | NaN     | NaN     |         | 22.498  | NaN     |         | 23.6511 | 23.8596 | Q60294;H3BU01    | Q60294           | tRNA wybutosine- LCMT2     |
|     | 28.6903 | 28.8784 | 29.3896 | 28.506  | 29.0828 | 29.4672 | 27.8763 | 27.7575 | 27.911  | 28.7516 | 28.6852 | 28.5861 | P13796;Q5TBN3;F  | P13796           | Plastin-2 LCP1             |
|     | 33.3494 | 33.498  | 33.8193 | 33.2376 | 33.4948 | 33.7064 | 33.3283 | 32.4451 | 32.519  | 33.191  | 33.1746 | 32.9026 | P00338;P00338-3  | P00338;P00338-3  | L-lactate dehydrog LDHA    |
|     | 31.7294 | 31.9416 | 31.6365 | 31.4406 | 31.9629 | 31.7863 | 32.4531 | 32.4125 | 32.3262 | 32.2532 | 32.4993 | 32.7089 | P07195;A8MW50    | P07195;A8MW50    | L-lactate dehydrog LDHB    |
|     | 27.4067 | 27.4989 | 27.2454 | 27.0901 | 26.8261 | 27.0707 | 27.2025 | 27.3484 | 26.9822 | 26.9472 | 26.6798 | 26.5101 | P01130;J3KMZ9;P  | P01130;J3KMZ9;P  | Low-density lipop LDLR     |
| NaN | NaN     | NaN     | NaN     | NaN     | NaN     | NaN     | NaN     | NaN     | NaN     | NaN     | NaN     | 19.7515 | Q5SW96           | Q5SW96           | Low density lipopi LDLRAP1 |
|     | 22.3825 | NaN     | NaN     | 22.5491 | NaN     | Q8NC56;H0Y9B7;J  | Q8NC56           | LEM domain-cont LEMD2      |



|         |         |        |         |         |         |         |         |         |         |         |         |         |         |                                                       |        |                             |       |
|---------|---------|--------|---------|---------|---------|---------|---------|---------|---------|---------|---------|---------|---------|-------------------------------------------------------|--------|-----------------------------|-------|
| NaN     | NaN     | NaN    | NaN     | NaN     | NaN     | NaN     | NaN     | NaN     | NaN     | NaN     | NaN     | 27.4442 | 29.1087 | Q9Y2U8                                                | Q9Y2U8 | Inner nuclear mer           | LEMD3 |
| 22.6278 | NaN     |        | 21.6296 | 22.623  | NaN     |         | NaN     | Q96PV6;Q96PV6-; Q96PV6;Q96PV6-; Leukocyte recept      |        | LENG8                       |       |
| 23.3031 | NaN     |        | 23.1065 | 23.1456 | 23.2797 | 23.6619 | NaN     | NaN     | NaN     | NaN     | 23.5557 | 23.9419 | NaN     | Q8WVVC0;Q8WVVC1 Q8WVVC0;Q8WVVC1 RNA polymerase-; LEO1 |        |                             |       |
| 26.0951 | 26.3963 |        | 25.9867 | 25.6156 | 26.2563 | 25.6465 | 26.2756 | 27.2405 | 27.2605 |         | 25.5568 | 25.8729 | 26.4845 | Q32P28;Q32P28-; Q32P28;Q32P28-; Prolyl 3-hydroxyla    |        | LEPRE1                      |       |
| 24.005  | 23.5015 |        | 23.4786 | 24.5474 | 23.5861 | 23.3855 | 23.0553 | 23.3516 | NaN     |         | 22.5919 | 22.6715 | 22.8824 | O95202;O95202-; O95202                                |        | LETM1 and EF-har LETM1      |       |
| 31.2405 | 30.6444 |        | 30.0247 | 30.5634 | 29.4999 | 29.6869 | 30.7597 | 28.6944 | 28.5877 |         | 30.2828 | 29.3326 | 28.4553 | P09382;F8WEI7 P09382                                  |        | Galectin-1 LGALS1           |       |
| 27.7762 | 28.2431 |        | 28.477  | 27.8985 | 27.9912 | 28.5676 | 28.2293 | 27.22   | 27.5684 |         | 28.4401 | 27.9071 | 27.9753 | P17931;G3V3R6 P17931;G3V3R6                           |        | Galectin-3;Galecti LGALS3   |       |
| 29.7178 | 29.9488 |        | 28.8573 | 28.9949 | 29.2846 | 28.5255 | 31.1694 | 30.9257 | 30.2254 |         | 30.2488 | 30.1617 | 29.2768 | Q08380;K7EP36;K Q08380                                |        | Galectin-3-binding LGALS3BP |       |
| 27.8391 | 27.4727 |        | 27.7672 | 27.0303 | 26.7094 | 27.1355 | 27.2152 | 27.0657 | 26.7425 |         | 26.9446 | 26.7704 | 25.9239 | O00214-2;O00214 O00214-2;O00214                       |        | Galectin-8;Galecti LGALS8   |       |
| 22.5636 | 24.228  | NaN    | NaN     |         | 23.2437 | NaN     |         | 26.365  | 26.4392 | 24.2623 | 22.138  | NaN     | NaN     | Q99538;Q99538-; Q99538;Q99538-; Legumain              |        | LGMN                        |       |
| 23.3996 |         | 23.99  | 24.1363 | 23.8479 | 24.0351 | 23.4757 | 24.1694 | 24.954  | NaN     |         | 24.4983 | 23.9042 | 24.1148 | Q6ZUX7 Q6ZUX7                                         |        | Lipoma HMGIC fu LHFP12      |       |
| 23.3276 | NaN     |        | 23.4664 | 23.3961 | 23.7678 | NaN     |         | NaN     | NaN     |         | 24.9614 | 25.2127 | 23.9419 | P18858-3;P18858 P18858-3;P18858                       |        | DNA ligase 1;DNA LIG1       |       |
| 23.1473 | NaN     |        | 22.8569 | 23.7546 | 22.8572 | 22.467  | NaN     | NaN     | NaN     | NaN     | NaN     |         | NaN     | P49916;P49916-3 P49916;P49916-3                       |        | DNA ligase 3 LIG3           |       |
| 21.9405 | NaN     |        | 21.3525 | NaN     | NaN     | NaN     |         | NaN     | NaN     |         | 22.1825 | NaN     | NaN     | P49917;A0A0C4D P49917;A0A0C4D                         |        | DNA ligase 4;DNA LIG4       |       |
| 27.751  | 28.4214 |        | 28.4948 | 27.8845 | 28.5526 | 28.6091 | 26.8779 | 24.5319 | 26.9997 |         | 28.2994 | 28.2608 | 28.7873 | Q9UHB6;Q9UHB6 Q9UHB6;Q9UHB6                           |        | LIM domain and a LIMA1      |       |
| 23.1716 | 23.7403 |        | 23.6114 | 22.9097 | 23.5793 | NaN     |         | NaN     | NaN     | NaN     | NaN     |         | NaN     | Q9UPQ0-3;Q9UP( Q9UPQ0-3;Q9UP(                         |        | LIM and calponin LIMCH1     |       |
| NaN     | 22.4191 |        | 22.2319 | NaN     | NaN     |         | 22.2106 | NaN     | NaN     | NaN     | NaN     |         | NaN     | Q9UGP4;C9JRJ5 Q9UGP4;C9JRJ5                           |        | LIM domain-cont LMD1        |       |
| NaN     | NaN     |        | 21.714  | NaN     |         | NaN     | Q9BT23;J3QQM5; Q9BT23;J3QQM5;                         |        | LIM domain-cont LMD2        |       |
| 27.1699 |         | 28.242 | 28.2619 | 27.3516 | 27.9716 | 28.4446 |         | 28.3393 | 27.8638 | 27.7029 | 28.7058 | 28.3677 | 28.0754 | Q9NUP9;G3V1D4 Q9NUP9;G3V1D4                           |        | Protein lin-7 hom LINTC     |       |
| NaN     | NaN     | NaN    | NaN     | NaN     | NaN     | NaN     |         | 25.363  | NaN     | NaN     | NaN     | NaN     | NaN     | P38571;A0A0A0N P38571;A0A0A0M                         |        | Lysosomal acid lip LIPA     |       |
| 21.9503 | NaN     | NaN    | NaN     | NaN     | NaN     | NaN     |         | NaN     | NaN     | NaN     | NaN     | NaN     | NaN     | Q9Y5X9;J3QQQ0; Q9Y5X9;J3QQQ0;                         |        | Endothelial lipase LIPG     |       |
| 27.127  | 27.1392 |        | 27.4331 | 27.0341 | 26.8547 | 27.4311 | 27.1876 | 26.6886 | 27.1752 |         | 27.0324 | 27.0498 | 26.7816 | Q15334;A0A087V Q15334;A0A087V                         |        | Lethal(2) giant lar LGL1    |       |
| 24.9569 | 25.0037 |        | 26.161  | 24.9986 | 25.0713 | 25.5029 | NaN     | NaN     | NaN     |         | 22.9047 | NaN     | NaN     | Q6P1M3;J3QRV5; Q6P1M3;J3QRV5;                         |        | Lethal(2) giant lar LGL2    |       |
| 27.4006 | 27.3883 |        | 27.6842 | 27.6426 | 27.5088 | 27.867  | 27.1973 | 27.6582 | 28.2874 |         | 26.9252 | 26.8028 | 27.7922 | P49257 P49257                                         |        | Protein ERGIC-53 LMAN1      |       |
| 27.928  | 27.3915 |        | 27.6402 | 28.0175 | 27.0215 | 27.3637 | 28.6218 | 27.2703 | 27.4782 |         | 27.7357 | 26.5689 | 26.5852 | Q12907;D6RBV2; Q12907;D6RBV2;                         |        | Vesicular integral- LMAN2   |       |
| 22.8871 | 22.6902 |        | 23.1501 | 22.9243 | NaN     | Q9H0V9;Q9H0V9- Q9H0V9;Q9H0V9-                         |        | VIP36-like protein LMAN2L   |       |
| 23.1374 | NaN     |        | 23.5051 | 24.0422 | NaN     | NaN     | NaN     | NaN     | NaN     |         | 23.3815 | NaN     | NaN     | Q68DH5 Q68DH5                                         |        | LMBR1 domain-cc LMBRD2      |       |
| 23.4654 | 23.3215 |        | 23.8604 | 23.8684 | 23.407  | NaN     |         | 24.637  | 23.8717 | 24.9257 | 24.0325 | 24.1729 | 24.1069 | Q9BU23;Q9BU23- Q9BU23;Q9BU23-                         |        | Lipase maturation LMF2      |       |
| 22.4924 | NaN     | NaN    |         | 23.321  | NaN     | P02545;P02545-6 P02545;P02545-6                       |        | Prelamin-A/C;Lam LMNA       |       |
| 30.0243 | 30.7243 |        | 30.6375 | 30.3332 | 30.8234 | 30.9918 | 30.2038 | 30.4742 | 29.9894 |         | 31.0378 | 31.2628 | 31.2363 | P02545-2;Q3BDU! P02545-2;Q3BDU!                       |        | Prelamin-A/C;Lam LMNA       |       |
| 29.1561 | 29.3009 |        | 29.0815 | 29.3396 | 29.2065 | 29.492  | 28.5624 | 28.8469 | 28.424  |         | 29.637  | 29.8212 | 29.598  | P20700;E9PBF6;A P20700;E9PBF6;A                       |        | Lamin-B1 LMNB1              |       |
| 26.8067 | 27.6748 |        | 27.4721 | 27.2745 | 28.1798 | 27.64   | 27.0298 | 27.4126 | 27.4639 |         | 28.1719 | 29.0542 | 28.6468 | Q03252;J9JID7 Q03252;J9JID7                           |        | Lamin-B2 LMNB2              |       |
| NaN     | NaN     | NaN    |         | 21.7296 | NaN     | Q8WW11-3;E9PM Q8WW11-3;E9PM;                          |        | LIM domain only; LMO7       |       |
| 27.2395 | 27.9527 |        | 28.1719 | 27.5256 | 27.8203 | 28.4132 | 26.5437 | 25.565  | 25.8232 |         | 27.2886 | 27.113  | 26.8726 | F8WD26 F8WD26                                         |        | LMO7                        |       |
| NaN     | NaN     | NaN    |         | 21.3126 | NaN     | Q9C0E8;Q9C0E8-; Q9C0E8;Q9C0E8-;                       |        | Protein lunapark LNP        |       |
| 28.8632 | 27.9319 |        | 28.6336 | 28.9043 | 28.0845 | 28.6858 | 27.4973 | 23.6083 | 25.8422 |         | 27.9819 | 26.2354 | 26.2887 | Q9UIQ6;Q9UIQ6-; Q9UIQ6;Q9UIQ6-;                       |        | Leucyl-cystinyl arr LNPEP   |       |
| 27.7332 | 26.7384 |        | 26.8616 | 27.5196 | 26.9807 | 27.1365 | 25.18   | 26.7353 | 27.3452 |         | 26.0043 | 26.2385 | 26.5669 | P36776;K7EKE6;P P36776;K7EKE6;P                       |        | Lon protease hom LONP1      |       |
| 26.3354 | 26.5759 |        | 26.2873 | 25.3577 | 25.6075 | 24.7695 | 27.5818 | 30.0328 | 28.9269 |         | 24.7129 | 25.0775 | 24.781  | P28300;Q08397 P28300                                  |        | Protein-lysine 6-o LOX      |       |
| 26.8094 | 27.0297 |        | 27.3426 | 26.0246 | 26.8276 | 26.3939 | 29.3706 | 29.5063 | 28.9876 |         | 26.8811 | 26.823  | 27.8339 | Q9Y4K0;H0YAP6; Q9Y4K0                                 |        | Lysyl oxidase hom LOXL2     |       |
| 25.5177 | 24.5603 |        | 25.3829 | 25.2288 | 24.1983 | 25.4686 | 24.2347 | NaN     | 24.3154 |         | 26.084  | 25.4782 | 24.914  | Q92633;Q6GPG7; Q92633;Q6GPG7;                         |        | Lysophosphatidic LPAR1      |       |
| 23.8597 | NaN     |        | 22.3628 | 23.8724 | 22.5657 | 23.1733 | 23.6363 | NaN     | NaN     |         | 24.7154 | NaN     | NaN     | Q8NF37;A0A0G2J Q8NF37;A0A0G2J                         |        | Lysophosphatidyl LPCAT1     |       |
| 25.3918 | 26.6077 |        | 26.8075 | 25.6241 | 26.696  | 26.8749 | 25.7701 | 24.7978 | 26.336  |         | 26.5676 | 26.1174 | 26.4141 | O95490;O95490-2 O95490;O95490-2                       |        | Latrophilin-2 LPHN2;ADGRL2  |       |
| NaN     | NaN     | NaN    | NaN     | NaN     | NaN     | NaN     | 26.0807 | NaN     | NaN     | NaN     | NaN     | NaN     | NaN     | Q92539 Q92539                                         |        | Phosphatidate ph LPIN2      |       |
| 24.3919 | 23.8032 |        | 23.8201 | 23.5883 | 23.0826 | 23.9931 | NaN     | NaN     | NaN     |         | 23.3037 | 23.0212 | 23.0212 | Q93052;A0A087V Q93052;A0A087V                         |        | Lipoma-preferred LPP        |       |
| 23.5367 | 23.3562 |        | 23.1988 | 22.8812 | 23.6683 | 22.9242 | NaN     | NaN     | NaN     |         | 24.2517 | NaN     | NaN     | O60711;O60711-; O60711;O60711-;                       |        | Leupaxin LPXN               |       |
| 26.8187 | 25.71   |        | 26.3323 | 26.7244 | 26.3093 | 26.5141 | NaN     | NaN     |         | 23.5968 | 25.1824 | 24.556  | NaN     | P50851-2;P50851 P50851-2;P50851;                      |        | Lipopolysaccharid LRBA      |       |
| 24.7137 | 23.9112 |        | 23.5572 | 24.504  | 23.8679 | 23.5766 | 23.6484 | NaN     | 24.1781 |         | 24.2255 | 23.5616 | NaN     | Q9Y2L9;Q9Y2L9-2 Q9Y2L9;Q9Y2L9-2                       |        | Leucine-rich repe LRCH1     |       |
| 23.9538 | 22.9069 |        | 23.2095 | 23.9868 | 22.841  | NaN     | NaN     | NaN     | NaN     |         | 23.7815 | 23.3174 | NaN     | Q96I18;Q96I18-3;C Q96I18;Q96I18-3;                    |        | C Leucine-rich repe LRCH3   |       |
| 24.8812 | 24.9175 |        | 24.5546 | 24.4022 | 23.9965 | 24.4463 | NaN     | NaN     |         | 25.3109 | 24.4763 | 24.0468 | 24.897  | Q7Z4F1;H0YHW7; Q7Z4F1;H0YHW7;                         |        | Low-density lipop LRP10     |       |
| NaN     | NaN     |        | 21.7716 | NaN     | Q9Y561;Q9Y561-2 Q9Y561;Q9Y561-2                       |        | Low-density lipop LRP12     |       |
| 22.951  | 22.7132 |        | 22.3469 | 22.5751 | 23.0862 | 22.5841 | NaN     | NaN     | NaN     |         | 23.3362 | 23.2594 | NaN     | P30533 P30533                                         |        | Alpha-2-macroglo LRPAP1     |       |
| 30.8832 | 30.0331 |        | 30.1581 | 31.3386 | 30.404  | 30.3738 | 28.4201 | 28.9594 | 29.5843 |         | 29.2248 | 29.2158 | 28.8159 | P42704;B8ZZ38;A P42704                                |        | Leucine-rich PPR r LRPPRC   |       |
| 24.9328 | 24.5009 |        | 25.1608 | 24.7752 | 24.4982 | 25.2011 | 24.8493 | 23.9173 | NaN     |         | 25.3661 | 24.5505 | 24.2826 | Q9BTT6;Q5TQ03; Q9BTT6                                 |        | Leucine-rich repe LRRC1     |       |
| NaN     | NaN     | NaN    | NaN     | NaN     | NaN     | NaN     | NaN     | NaN     | NaN     |         | 20.181  | NaN     | NaN     | Q15048;E9PNL0;E Q15048;E9PNL0;                        |        | Leucine-rich repe LRRC14    |       |
| 26.0901 | 25.7749 |        | 25.2197 | 25.4259 | 25.8307 | 24.9679 | 25.7729 | 25.0912 | 24.6666 |         | 25.6117 | 25.4099 | 25.1618 | Q8TCA0;Q8TCA0- Q8TCA0;Q8TCA0-                         |        | Leucine-rich repe LRRC20    |       |
| 22.9556 | NaN     |        | 22.573  | 22.6956 | 22.8971 | NaN     | NaN     | NaN     | NaN     |         | 22.1817 | 22.8533 | 22.6276 | Q9H9A6 Q9H9A6                                         |        | Leucine-rich repe LRRC40    |       |
| 23.7685 | NaN     | NaN    | NaN     | NaN     | NaN     | NaN     | NaN     | NaN     | NaN     | NaN     | NaN     | NaN     | NaN     | A0A087WTU1;Q1 A0A087WTU1;Q1                           |        | Leucine-rich repe LRRC41    |       |
| 26.0076 | 26.136  |        | 25.8145 | 25.6817 | 26.0333 | 25.9503 | 25.8494 | 25.8549 | 26.452  |         | 25.9559 | 26.2788 | 26.4696 | Q8N1G4 Q8N1G4                                         |        | Leucine-rich repe LRRC47    |       |
| 24.6096 | 25.0912 |        | 25.3945 | 24.7888 | 25.1885 | 25.4791 | 24.9317 | NaN     |         | 25.0201 | 25.1545 | 25.23   | 25.3709 | Q8N9N7;H3BSW0 Q8N9N7;H3BSW0                           |        | Leucine-rich repe LRRC57    |       |
| 26.1284 | 26.1455 |        | 25.8604 | 26.0911 | 25.97   | 25.8236 | 26.1286 | 26.1972 | 26.3158 |         | 25.7483 | 25.6478 | 25.6998 | Q96AG4 Q96AG4                                         |        | Leucine-rich repe LRRC59    |       |



|         |         |         |         |         |         |         |         |         |         |         |         |                  |                  |                    |                  |
|---------|---------|---------|---------|---------|---------|---------|---------|---------|---------|---------|---------|------------------|------------------|--------------------|------------------|
| NaN     | 26.1629 | 24.6993 | 24.0712 | 24.1015 | 24.143  | NaN     | 27.0654 | 28.0381 | 26.6302 | 26.5776 | 27.5299 | Q96NW7;A0A075    | Q96NW7;A0A075    | Leucine-rich repe  | LRRC7            |
| 26.6252 | 26.2434 | 27.1144 | 26.8313 | 26.6709 | 27.3112 | 26.418  | 25.9175 | 26.6216 | 26.6625 | 26.4411 | 26.547  | Q8IWT6           | Q8IWT6           | Volume-regulated   | LRRC8A           |
| 26.7694 | 26.2373 | 27.0863 | 27.0072 | 26.5855 | 27.169  | 26.0811 | 25.1116 | 26.3456 | 26.8474 | 26.4263 | 26.5398 | Q8TDW0;A6NED7    | Q8TDW0           | Volume-regulated   | LRRC8C           |
| 24.5943 | 24.1527 | 24.7086 | 24.7198 | 24.1059 | 24.7633 | 24.3704 | NaN     | NaN     | 24.6433 | 24.2844 | 24.0294 | Q7L1W4;E9PMF9    | Q7L1W4           | Volume-regulated   | LRRC8D           |
| 25.3654 | 25.5333 | 26.1286 | 25.9129 | 26.1722 | 25.8535 | 25.8071 | 25.5969 | 26.481  | 26.0447 | 25.5428 | 26.3144 | Q6NSJ5;M0QZ48;   | Q6NSJ5           | Volume-regulated   | LRRC8E           |
| 25.8994 | 25.6291 | 25.3286 | 25.2606 | 24.8012 | 25.1151 | 25.4547 | 25.3366 | 25.1755 | 24.7084 | 24.8953 | 25.1814 | Q32M24-3         | Q32M24-3         | Leucine-rich repe  | LRRFIP1          |
| 24.183  | 24.806  | 24.4352 | 24.03   | 25.0136 | 24.5603 | 24.5912 | 25.837  | 24.5879 | 24.3662 | 25.1247 | 24.4974 | Q9Y608-2;Q9Y60E  | Q9Y608-2;Q9Y60E  | Leucine-rich repe  | LRRFIP2          |
| NaN     | 26.3753 | NaN     | Q38SD2;E9PK39;f  | Q38SD2           | Leucine-rich repe  | LRRK1            |
| NaN     | 23.1438 | 23.1742 | NaN     | 22.9625 | NaN     | NaN     | NaN     | NaN     | 22.866  | NaN     | 23.9631 | Q6UWE0;Q6UWE     | Q6UWE0;Q6UWE     | E3 ubiquitin-prote | LRSAM1           |
| 23.7452 | 22.9758 | 23.0456 | 23.5507 | 22.6333 | 22.2994 | NaN     | NaN     | NaN     | 22.6274 | 22.8118 | NaN     | Q9UFC0;H7C556;f  | Q9UFC0;H7C556    | Leucine-rich repe  | LRWD1            |
| 25.8633 | 24.2192 | 24.7414 | 25.7086 | 24.5372 | 24.396  | 24.1637 | NaN     | 22.7879 | 23.7433 | NaN     | NaN     | Q9H089;H7C2X7;f  | Q9H089           | Large subunit GTP  | LSG1             |
| 23.3088 | 23.9152 | 23.3985 | 22.8205 | 23.7775 | 23.3777 | 23.4992 | NaN     | NaN     | NaN     | 23.4145 | 24.237  | Q15116;E5RJ47;E  | Q15116;E5RJ47;E  | U6 snRNA-associa   | LSM1             |
| 25.2047 | 25.7349 | 25.2034 | 24.796  | 25.3644 | 25.085  | 24.8849 | 24.9887 | NaN     | 23.7648 | 24.6022 | 25.1688 | Q3MHD2;Q3MHD     | Q3MHD2;Q3MHD     | Protein LSM12 ho   | LSM12            |
| 22.6935 | 23.1588 | NaN     | NaN     | 23.0879 | NaN     | Q8ND56;Q8ND56    | Q8ND56;Q8ND56    | Protein LSM14 ho   | LSM14A           |
| 23.7545 | 24.0511 | 23.8455 | 23.9593 | 24.1458 | 23.4677 | NaN     | 24.1812 | NaN     | 22.9456 | NaN     | 23.4863 | Q9BX40;Q9BX40-   | Q9BX40;Q9BX40-   | Protein LSM14 ho   | LSM14B           |
| 25.0047 | 25.1283 | 24.821  | 24.8475 | 24.972  | 24.8299 | 24.8675 | 24.6932 | 24.7709 | 25.1271 | 25.0678 | 25.2678 | Q9Y333           | Q9Y333           | U6 snRNA-associa   | LSM2             |
| 24.152  | 24.9827 | 24.357  | 24.17   | 25.1094 | 24.7419 | 24.7984 | 25.2322 | 24.6354 | 24.6018 | 25.0929 | 25.2578 | P62310           | P62310           | U6 snRNA-associa   | LSM3             |
| 25.433  | 25.2944 | 24.9426 | 25.2021 | 25.097  | 25.0896 | 25.1059 | NaN     | NaN     | 25.831  | 25.6512 | NaN     | Q9Y4Z0;V9GZ56;L  | Q9Y4Z0;V9GZ56;L  | U6 snRNA-associa   | LSM4             |
| 25.91   | 26.2952 | 25.9559 | 25.7852 | 26.2342 | 25.975  | 25.8696 | 25.5791 | 25.2839 | 26.8916 | 26.667  | 26.2505 | P62312           | P62312           | U6 snRNA-associa   | LSM6             |
| 23.3617 | 23.6576 | 24.0088 | 23.5237 | 25.3015 | 23.2225 | 25.5518 | NaN     | 23.78   | 25.1136 | 24.3929 | 25.1373 | Q9UK45;K7ENY5;f  | Q9UK45;K7ENY5;f  | U6 snRNA-associa   | LSM7             |
| 24.3821 | 24.7375 | 24.567  | 24.6324 | 24.4891 | 24.7643 | 24.5005 | NaN     | NaN     | 24.9001 | 24.8942 | 24.6647 | O95777;F2Z2Y6;C  | O95777;F2Z2Y6;C  | U6 snRNA-associa   | LSM8             |
| 28.6076 | 29.0223 | 29.6796 | 28.8478 | 28.9799 | 29.8265 | 28.6454 | 28.2451 | 28.726  | 29.5955 | 29.1198 | 29.1748 | Q86X29;S4R3V8;C  | Q86X29;S4R3V8;C  | Lipolysis-stimulat | LSR              |
| NaN     | NaN     | NaN     | 22.535  | NaN     | Q86X29-3         | Q86X29-3         | Lipolysis-stimulat | LSR              |
| 25.3342 | 25.0849 | 25.4261 | 25.3717 | 24.8248 | 25.0657 | 24.6106 | 25.9261 | 25.1608 | 25.3628 | 24.6912 | 23.6066 | P48449;P48449-3; | P48449;P48449-3; | Lanosterol syntha  | LSS              |
| 27.7636 | 28.213  | 28.054  | 27.5724 | 28.046  | 28.1499 | 28.2322 | 27.7129 | 27.7773 | 28.3497 | 28.1584 | 28.0837 | P09960;P09960-4; | P09960;P09960-4; | Leukotriene A-4 h  | LTA4H            |
| NaN     | NaN     | NaN     | NaN     | NaN     | NaN     | 26.607  | 27.7824 | 27.9573 | 24.2262 | 24.3473 | 25.7943 | Q14766;Q14766-   | Q14766;Q14766-   | Latent-transformi  | LTPB1            |
| NaN     | NaN     | NaN     | NaN     | NaN     | NaN     | 25.5875 | 26.7705 | NaN     | NaN     | NaN     | NaN     | Q8N251;Q8N251-   | Q8N251;Q8N251-   | Latent-transformi  | LTPB4            |
| 25.5358 | 23.915  | 24.2079 | 24.2269 | 23.6154 | 24.2716 | NaN     | NaN     | NaN     | 23.995  | 23.5577 | 23.4804 | O94822;O94822-   | O94822;O94822-   | E3 ubiquitin-prote | LTN1             |
| 23.7559 | 22.1622 | 22.5137 | 23.432  | 22.3698 | 22.6447 | NaN     | NaN     | NaN     | 22.4709 | NaN     | NaN     | Q96GA3;A0A075E   | Q96GA3;A0A075E   | Protein LTV1 hom   | LTV1             |
| 27.3915 | 26.4213 | 27.0272 | 27.8642 | 26.4362 | 28.2467 | 26.7676 | 26.0386 | NaN     | 28.0104 | 27.7209 | 27.4091 | Q9NQ29;Q9NQ29    | Q9NQ29;Q9NQ29    | Putative RNA-binc  | LUC7L            |
| 28.3761 | 26.9485 | 27.6752 | 28.0808 | 27.3642 | 27.9093 | 27.2706 | 27.3184 | 25.9203 | 28.7128 | 28.2232 | 27.5108 | Q9Y383;A0A0A6Y   | Q9Y383;A0A0A6Y   | Putative RNA-binc  | LUC7L2;C7orf55-L |
| 26.5243 | 24.4352 | 25.729  | 26.2357 | 25.4723 | 25.5466 | 24.274  | 24.7971 | NaN     | 26.1797 | 25.7846 | 25.1948 | O95232;J3KPP4;D  | O95232;J3KPP4    | Luc7-like protein  | LUC7L3           |
| 25.9679 | 26.6085 | 26.4044 | 25.8361 | 26.4941 | 26.2826 | 26.6634 | 27.1735 | 26.718  | 25.8309 | 25.926  | 26.3152 | Q86V48;Q86V48-   | Q86V48;Q86V48-   | Leucine zipper prc | LUZP1            |
| 23.8623 | 24.6071 | 23.5694 | 23.1931 | 23.7726 | NaN     | NaN     | NaN     | 23.5157 | 23.639  | 22.4201 | NaN     | Q9BS40           | Q9BS40           | Latexin            | LXN              |
| 27.02   | 25.9802 | 26.1935 | 27.491  | 27.2438 | 26.0846 | 25.3187 | 24.855  | 24.2788 | 28.019  | 27.196  | 26.3315 | Q9NX58           | Q9NX58           | Cell growth-regul  | LYAR             |
| 27.7285 | 27.2705 | 27.9233 | 27.7729 | 26.9842 | 27.8444 | 27.6644 | 26.9127 | 27.5067 | 28.2141 | 27.6477 | 27.4326 | P07948;E5RJ37;P  | P07948           | Tyrosine-protein k | LYN              |
| NaN     | NaN     | 23.0522 | NaN     | P07948-2         | P07948-2         | Tyrosine-protein k | LYN              |
| 22.7623 | 23.4334 | 23.222  | 23.0118 | 23.6189 | 23.9135 | 23.0819 | NaN     | NaN     | NaN     | NaN     | NaN     | O75608;E5RGR0;C  | O75608;E5RGR0;C  | Acyl-protein thioe | LYPLA1           |
| 25.2562 | 24.984  | 24.686  | 24.5142 | 24.4737 | NaN     | 25.4778 | NaN     | NaN     | 25.4372 | 24.9575 | NaN     | O95372;Q5QPQ0;   | O95372;Q5QPQ0;   | Acyl-protein thioe | LYPLA2           |
| 23.3594 | 23.711  | 23.6958 | 22.9889 | 23.9065 | 23.7417 | NaN     | NaN     | NaN     | 23.2376 | 23.2024 | NaN     | Q5VWZ2;Q5VWZ2;   | Q5VWZ2;Q5VWZ2;   | Lysophospholipas   | LYPLA1           |
| 22.9601 | NaN     | Q5U5X0           | Q5U5X0           | Complex III assem  | LYRM7            |
| NaN     | 24.6436 | NaN     | NaN     | 24.037  | P61626;F8VV32;A  | P61626;F8VV32;A  | Lysozyme C;Lysoz   | LYZ              |
| 24.1502 | 24.146  | 24.0719 | 23.7161 | 23.8908 | 23.8689 | 24.1269 | 24.4681 | NaN     | 23.5935 | 24.3651 | NaN     | Q9NQ48;Q9NQ48    | Q9NQ48;Q9NQ48    | Leucine zipper tra | LZTF1            |
| 27.796  | 27.1858 | 27.4431 | 28.2612 | 27.222  | 27.682  | 27.108  | 27.4811 | 26.4448 | 27.061  | 26.6081 | 26.3069 | P20645;F5GX30;H  | P20645;F5GX30    | Cation-dependent   | M6PR             |
| 22.8485 | 23.076  | 23.6621 | 23.4248 | 22.8208 | 23.6354 | NaN     | NaN     | NaN     | NaN     | NaN     | 23.3073 | A0A0A6YYJ5;O94f  | A0A0A6YYJ5       |                    | MACF1            |
| 28.6867 | 28.7145 | 28.8661 | 28.6124 | 28.9066 | 28.9625 | 29.126  | 29.5883 | 29.3036 | 28.9133 | 28.834  | 29.2549 | H3BP1;H3BP1;H3B  | Q9BQ69           | Microtubule-actin  | MACF1            |
| 23.4767 | NaN     | NaN     | 23.6609 | NaN     | Q9BQ69           | Q9BQ69           | O-acetyl-ADP-ribo  | MACROD1          |
| NaN     | NaN     | NaN     | NaN     | 26.5039 | NaN     | Q9Y6D9;C9JJ38;Q  | Q9Y6D9;C9JJ38;Q  | Mitotic spindle as | MAD1L            |
| 25.6006 | 25.1647 | 25.2801 | 25.4054 | 24.9163 | 25.1507 | 25.5656 | NaN     | 24.7566 | 25.6138 | 25.4151 | 25.0628 | Q13257;Q13257-   | Q13257           | Mitotic spindle as | MAD2L1           |
| 25.4203 | 24.3283 | 25.0677 | 24.8161 | 24.3052 | 24.5962 | 24.8656 | NaN     | NaN     | 24.5014 | 24.7363 | NaN     | Q8WXG6-3;Q8Wx    | Q8WXG6-3;Q8Wx    | MAP kinase-activ   | MADD             |
| 23.7209 | 23.0319 | 23.3504 | 23.9449 | 23.1356 | 23.3363 | NaN     | NaN     | NaN     | 23.427  | 23.2701 | NaN     | Q7L5Y9;B4DVN3;f  | Q7L5Y9;B4DVN3;f  | Macrophage eryl    | MAEA             |
| 23.6736 | 24.0666 | 22.8449 | NaN     | 23.1558 | 22.9614 | NaN     | NaN     | NaN     | NaN     | NaN     | NaN     | Q9ULX9;B0QY70;f  | Q9ULX9;B0QY70;f  | Transcription fact | MAFF             |
| 26.9336 | 26.3749 | 26.6189 | 27.1105 | 26.3727 | 26.542  | 26.0431 | 25.421  | 25.5201 | 26.1058 | 26.6132 | 25.6829 | Q9UNF1;Q5H909;   | Q9UNF1;Q5H909;   | Melanoma-associ    | MAGED2           |
| NaN     | NaN     | NaN     | 22.2605 | NaN     | Q96QZ7;Q96QZ7-   | Q96QZ7;Q96QZ7-   | Membrane-associ    | MAGI1            |
| 27.8126 | 27.4799 | 27.471  | 27.738  | 27.74   | 27.651  | 26.5743 | 26.8363 | 26.6402 | 26.9781 | 27.595  | 27.8474 | P61326;P61326-2  | P61326;P61326-2  | Protein mago nas   | MAGOH            |
| 24.2769 | 24.4489 | 24.856  | 24.8111 | 24.6544 | NaN     | 24.9093 | 25.2839 | 26.3109 | 25.1742 | 25.0079 | 25.3333 | Q9H0U3;A0A087v   | Q9H0U3;A0A087v   | Magnesium transj   | MAGT1            |
| NaN     | NaN     | 21.9941 | 22.4034 | 21.5139 | NaN     | NaN     | NaN     | NaN     | 21.2313 | 21.4732 | NaN     | Q9BXY0;H0YBV6    | Q9BXY0;H0YBV6    | Protein MAK16 hc   | MAK16            |
| 22.7669 | NaN     | 22.8298 | 22.8357 | NaN     | O60476;H0Y7H1;f  | O60476;H0Y7H1    | Mannosyl-oligosa   | MAN1A2           |
| NaN     | NaN     | NaN     | 22.2628 | NaN     | NaN     | NaN     | NaN     | NaN     | 22.7837 | NaN     | NaN     | Q9UKM7;H0YG20    | Q9UKM7;H0YG20    | Endoplasmic retic  | MAN1B1           |
| 26.7883 | 26.3004 | 26.5186 | 26.7749 | 26.3514 | 26.6302 | 27.3332 | 25.7974 | 25.9561 | 26.2411 | 25.6819 | 25.7056 | Q16706           | Q16706           | Alpha-mannosida    | MAN2A1           |



|     |         |         |         |         |         |         |         |         |         |         |         |         |                   |                   |                                  |                                |                            |
|-----|---------|---------|---------|---------|---------|---------|---------|---------|---------|---------|---------|---------|-------------------|-------------------|----------------------------------|--------------------------------|----------------------------|
|     | 24.359  | 25.4611 | 24.4605 | 24.064  | 24.7589 | 24.1091 | 25.2141 | 25.8822 | 25.2892 | 24.3745 | 23.4974 | 24.3498 | O00754;O00754-2   | O00754;O00754-2   | Lysosomal alpha- MAN2B1          |                                |                            |
|     | 26.1779 | 27.0473 | 26.4408 | 26.0355 | 26.9931 | 26.3915 | 26.5574 | 28.2454 | 27.5651 | 26.4305 | 26.5895 | 27.0843 | P55145;A8K878;H   | P55145;A8K878     | Mesencephalic as MANF            |                                |                            |
| NaN |         | NaN     | 31.6676 | NaN     | 28.0665 | 29.224  | P78559;E9PGC8;P   | P78559;E9PGC8;P   | Microtubule-asso MAP1A           |                                |                            |
|     | 27.9761 | 28.101  | 27.8775 | 27.046  | 27.1469 | 26.8765 | 27.5868 | 27.9209 | 27.9489 | 26.8666 | 26.7411 | 26.9743 | P46821;D6RA32;C   | P46821            | Microtubule-asso MAP1B           |                                |                            |
|     | 28.4475 | 27.7709 | 28.2952 | 27.2672 | 26.5082 | 27.4217 | 28.976  | 28.5378 | 28.6713 | 28.231  | 27.1904 | 27.9618 | Q9GZQ8;A6NCE7;Q   | Q9GZQ8;A6NCE7;Q   | Microtubule-asso MAP11C3B;MAP11  |                                |                            |
|     | 26.8289 | 26.0714 | 25.8806 | 26.334  | 25.9938 | 25.8747 | 25.7705 | 25.6754 | 25.8998 | 26.4306 | 25.8257 | 25.645  | Q66K74;Q66K74-;Q  | Q66K74;Q66K74-;Q  | Microtubule-asso MAP15           |                                |                            |
|     | 28.9736 | 28.7112 | 28.7903 | 28.8661 | 28.6417 | 28.8428 | 28.6439 | 28.1005 | 28.5346 | 29.1736 | 29.4136 | 28.4535 | Q02750;Q02750-;Q  | Q02750;Q02750-2   | Dual specificity mi MAP2K1       |                                |                            |
|     | 27.7721 | 27.3411 | 27.5263 | 27.5487 | 27.5486 | 27.6155 | 27.559  | 27.3328 | 27.5143 | 28.1141 | 28.4566 | 27.3959 | P36507;G5E9C7;A   | P36507;G5E9C7     | Dual specificity mi MAP2K2       |                                |                            |
|     | 27.0822 | 26.1887 | 26.4214 | 26.9898 | 26.4519 | 26.2726 | 25.949  | 26.7464 | 26.6861 | 26.5059 | 26.4782 | 26.225  | P46734;P46734-3;P | P46734;P46734-3;P | Dual specificity mi MAP2K3       |                                |                            |
|     | 23.8775 | 23.6593 | 23.7695 | 24.0897 | 23.7565 | 24.0618 | NaN     | NaN     | NaN     | 23.9592 | 23.926  | 23.7177 | P45985;P45985-2;P | P45985;P45985-2   | Dual specificity mi MAP2K4       |                                |                            |
| NaN |         | NaN     | NaN     |         | 21.3959 | NaN     | NaN     | NaN     | NaN     | NaN     | NaN     |         | Q13163;A6NK28;C   | Q13163;A6NK28;C   | Dual specificity mi MAP2K5       |                                |                            |
|     | 22.1731 | NaN     | NaN     |         | 21.5485 | NaN     | NaN     | NaN     | NaN     | NaN     | NaN     |         | Q9Y6R4;Q9Y6R4-;Q  | Q9Y6R4;Q9Y6R4-;Q  | Mitogen-activater MAP3K4         |                                |                            |
|     | 23.1001 | NaN     |         | 23.1007 | NaN     | NaN     | NaN     |         | 22.8432 | NaN     | NaN     |         | O43318;O43318-2   | O43318;O43318-2   | Mitogen-activater MAP3K7;DKFZp58 |                                |                            |
|     | 27.2507 | 28.0473 | 27.067  | 26.1566 | 26.7231 | 26.1862 | 26.1785 | 27.823  | 27.3903 | 25.137  | 25.9706 | 26.6043 | P27816;E7EVA0;P   | P27816;E7EVA0;P   | Microtubule-asso MAP4            |                                |                            |
|     | 23.5863 | 23.2263 | 23.194  | 23.3076 | 23.1269 | 23.1975 | 22.9171 | 23.0907 | 23.2338 | 23.3316 | 23.1621 | 23.1546 | Q8IVH8;Q8IVH8-3   | Q8IVH8;Q8IVH8-3   | Mitogen-activater MAP4K3         |                                |                            |
|     | 28.781  | 28.8679 | 29.3542 | 28.7866 | 28.6257 | 29.3526 | 28.8922 | 28.6059 | 29.2403 | 29.1786 | 28.9207 | 28.9495 | G5E948;A0A0D9S    | G5E948;A0A0D9S    | Mitogen-activater MAP4K4         |                                |                            |
|     | 27.1393 | 26.0102 | 26.4383 | 26.9264 | 26.2084 | 26.2448 | 25.7464 | 25.3875 | 26.6831 | 26.8216 | 27.1426 | 25.6515 | Q9Y4K4;A0A0A0N    | Q9Y4K4;A0A0A0N    | Mitogen-activater MAP4K5         |                                |                            |
|     | 26.0215 | 25.6726 | 26.1707 | 25.6033 | 25.8746 | 25.865  | NaN     | NaN     | NaN     | NaN     | NaN     |         | Q3KQU3;Q3KQU3     | Q3KQU3;Q3KQU3     | MAP7 domain-cor MAP7D1           |                                |                            |
|     | 24.5289 | 24.5354 | 24.6177 | 24.7254 | 24.8697 | 25.0768 | NaN     | NaN     | NaN     | NaN     | NaN     |         | Q8IWC1;Q8IWC1- Q  | Q8IWC1;Q8IWC1- Q  | MAP7 domain-cor MAP7D3           |                                |                            |
|     | 27.4111 | 27.2728 | 27.2366 | 27.1033 | 27.1852 | 27.3709 | 27.2166 | 26.3147 | 27.5887 | 27.4901 | 27.5042 | 27.7701 | P28482;P28482-2   | P28482;P28482-2   | Mitogen-activater MAPK1          |                                |                            |
|     | 20.9649 | NaN     |         | 22.0678 | NaN     | NaN               | O15264;O15264-2   | O15264                           | Mitogen-activater MAPK13       |                            |
|     | 26.3932 | 26.3032 | 26.2693 | 26.4504 | 26.3028 | 26.5014 |         | 26.4854 | 26.215  | 26.1694 | 26.3687 | 26.4824 | 26.6664           | Q16539;Q16539-3   | Q16539;Q16539-3                  | Mitogen-activater MAPK14       |                            |
| NaN |         | NaN     | NaN     | NaN     | NaN     | NaN     |         | 24.822  | NaN     | NaN     | NaN     | NaN     | NaN               | Q8NDC0            | Q8NDC0                           | MAPK-interacting MAPK1IP1L     |                            |
|     | 25.9629 | 25.019  | 25.8482 | 25.6526 | 25.1641 | 25.8058 | 25.4919 | 24.9019 | 24.7724 | 26.6577 | 26.6189 | 25.5004 | P27361;P27361-3   | P27361;P27361-3   | Mitogen-activater MAPK3          |                                |                            |
|     | 25.6179 | 23.8197 | 24.6    | 25.5001 | 23.6973 | 24.4735 | 24.2879 | NaN     | 24.3477 | 24.1049 | 23.9217 | NaN     | P45983-3;P45983   | P45983-3;P45983   | Mitogen-activater MAPK8;MAPK10   |                                |                            |
|     | 23.5262 | 23.413  | 23.5076 | 23.7462 | 23.8446 | NaN     | NaN     | NaN     | 24.9084 |         | 22.7105 | NaN     | 24.4543           | Q9BPZ7;Q9BPZ7-;Q  | Q9BPZ7;Q9BPZ7-;Q                 | Target of rapamy; MAPKAP1      |                            |
|     | 21.7505 | NaN     | NaN     |         | 21.8238 | NaN     | NaN     | NaN     | NaN     | NaN     |         | 22.024  | 22.302            | NaN               | P49137;P49137-2                  | P49137;P49137-2                | MAP kinase-activ: MAPKAPK2 |
|     | 24.2189 | 23.2078 | 23.9006 | 24.0486 | 23.8343 | NaN     | NaN     |         | 23.6176 | NaN     | 24.3061 | 24.0833 | NaN               | Q16644;C9J8E1;C   | Q16644;C9J8E1                    | MAP kinase-activ: MAPKAPK3     |                            |
|     | 29.2523 | 28.9762 | 29.0636 | 29.0289 | 28.5002 | 28.7882 | 28.6598 | 28.3639 | 28.3269 | 28.4683 | 28.3315 | 28.8183 | Q15691            | Q15691            | Microtubule-asso MAPRE1          |                                |                            |
|     | 24.7379 | 25.19   | 25.4002 | 25.5429 | 25.4128 | 25.4621 | 24.488  | NaN     | 25.2614 | 25.7175 | 25.693  | 25.4641 | Q15555;Q15555-4   | Q15555;Q15555-4   | Microtubule-asso MAPRE2          |                                |                            |
|     | 29.7194 | 29.8194 | 29.8823 | 28.8931 | 28.9494 | 29.2429 | 30.2157 | 29.4892 | 29.5428 | 29.7474 | 29.4652 | 29.8384 | P29966;A0A087W    | P29966;A0A087W    | Myristoylated ala MARCKS         |                                |                            |
|     | 27.48   | 28.9274 | 29.0915 | 27.8173 | 29.0112 | 29.1401 | 28.9359 | 28.7743 | 29.2587 | 29.2814 | 29.3736 | 29.6417 | P49006            | P49006            | MARCKS-related MARCKSL1          |                                |                            |
|     | 26.7466 | 26.9397 | 27.2616 | 26.9777 | 27.2348 | 27.4675 | 27.1726 | 26.5009 | 26.9993 | 27.5527 | 27.5887 | 27.673  | E9PC69;Q7KZ17-1   | E9PC69;Q7KZ17-1   | Serine/threonine- MARK2          |                                |                            |
|     | 23.9258 | 24.1337 | 24.3036 | 24.2329 | 24.1363 | 24.7858 | 24.0334 | 24.8139 | NaN     | 24.3882 | 24.6312 | 24.7406 | P27448;P27448-3   | P27448;P27448-3   | MAP/microtubule MARK3            |                                |                            |
|     | 29.8034 | 28.4875 | 29.12   | 29.892  | 29.0764 | 29.2877 | 28.2029 | 28.6909 | 28.6448 | 29.0245 | 29.103  | 28.2499 | P56192;P56192-2   | P56192;P56192-2   | Methionine-tRNA MARS             |                                |                            |
|     | 28.2691 | 28.5    | 28.4468 | 28.3905 | 28.6794 | 28.7064 | 28.3158 | 28.4555 | 28.1474 | 29.3839 | 29.7695 | 29.5416 | P31153;P31153-2   | P31153;P31153-2   | S-adenosylmethio MAT2A           |                                |                            |
|     | 26.3512 | 26.5352 | 26.0681 | 26.1029 | 26.421  | 26.0498 | 26.4085 | 26.9308 | 26.1686 | 27.0021 | 26.6082 | 26.7442 | Q9NZL9;H7C0X7;C   | Q9NZL9;H7C0X7;C   | Methionine aden: MAT2B           |                                |                            |
| NaN |         | NaN     | NaN     |         | 22.4478 | NaN     |                   | Q9NZL9-2;Q9NZL    | Q9NZL9-2;Q9NZL                   | Methionine aden: MAT2B         |                            |
|     | 29.5423 | 28.9109 | 29.1986 | 29.6527 | 29.2841 | 29.3675 | 27.6939 | 29.0974 | 28.1739 | 29.2433 | 29.5117 | 29.2837 | P43243;A8MXP9;P   | P43243;A8MXP9;P   | Matrin-3 MATR3                   |                                |                            |
|     | 23.9889 | 24.0532 | 23.5557 | 23.8099 | NaN     |         | 23.8634 | NaN     | NaN     | NaN     |         | 24.3882 | NaN               | Q7Z434;Q7Z434-5   | Q7Z434;Q7Z434-5                  | Mitochondrial ant MAVS         |                            |
|     | 26.3692 | 25.2936 | 25.7148 | 26.096  | 25.3717 | 25.0112 | 23.3104 | 24.7096 | 25.0554 | 23.7155 | 24.8686 | 23.7018 | Q8N884;Q8N884- Q  | Q8N884;Q8N884- Q  | Cyclic GMP-AMP MB21D1            |                                |                            |
|     | 23.1788 | 22.825  | 23.0089 | 23.8496 | 23.603  | 22.8771 | NaN     | NaN     | NaN     |         | 22.929  | 23.2664 | NaN               | O95983;O95983-2   | O95983;O95983-2                  | Methyl-CpG-bindi MBD3          |                            |
|     | 24.9886 | 24.7327 | 25.0236 | 25.4809 | 25.3431 | 25.3982 | 25.8061 | 24.689  | 25.7442 | 25.7491 | 25.831  | 26.1106 | Q68D91            | Q68D91            | Metallo-beta-lact: MBLAC2        |                                |                            |
|     | 25.2052 | NaN     | NaN     | 25.2928 | 23.9549 | NaN     |         | 24.4282 | NaN     | NaN     | 23.6986 | 24.0605 | NaN               | Q9NR56;C9JP00;A   | Q9NR56;C9JP00;A                  | Muscleblind-like p MBNL1;MBNL3 |                            |
|     | 25.5266 | 25.3722 | 25.6544 | 25.6481 | 25.1439 | 25.3848 | 25.6288 | 25.12   | NaN     | 25.477  | 25.2108 | 24.9084 | Q96N66;Q96N66- Q  | Q96N66;Q96N66- Q  | Lysophospholipid MBOAT7          |                                |                            |
|     | 24.2683 | 25.395  | 25.5931 | 24.5054 | 25.0623 | 25.7818 | 24.5699 | NaN     | NaN     | NaN     | NaN     |         | NaN               | J3QKQ6;P02686;P   | J3QKQ6;P02686;P                  | Myelin basic prot: MBP         |                            |
| NaN |         | NaN     | NaN     | NaN     | NaN     | NaN     |         | 21.7834 | NaN     | NaN     | 22.6748 | 21.6132 | NaN               | Q14703;H3BV53     | Q14703                           | Membrane-bounc MBTPS1          |                            |
|     | 26.8253 | 26.8696 | 27.2273 | 26.7489 | 26.8269 | 27.2414 | 28.0754 | 27.323  | 26.5358 | 28.39   | 27.4296 | 26.8221 | P43121;P43121-2   | P43121            | Cell surface glyco: MCAM         |                                |                            |
|     | 24.9239 | 24.4934 | 24.4184 | 24.9209 | 24.3266 | 23.3264 | NaN     | NaN     |         | 23.777  | 23.7979 | 23.731  | NaN               | Q96RQ3;F5GYT8;I   | Q96RQ3;F5GYT8;I                  | Methylcrotonoyl- MCCC1         |                            |
|     | 24.1992 | 25.2484 | 24.7225 | 24.8165 | 25.5686 | 24.5589 | 23.6934 | 25.3549 | 25.2543 | 23.5965 | 24.0444 | 24.2212 | Q9HCC0;Q9HCC0- Q  | Q9HCC0;Q9HCC0- Q  | Methylcrotonoyl- MCCC2           |                                |                            |
|     | 29.159  | 27.3385 | 28.491  | 28.755  | 28.1318 | 28.7573 | 26.602  | 26.2086 | 26.6041 | 29.1481 | 28.7866 | 28.1001 | P49736;HOY8E6     | P49736;HOY8E6     | DNA replication li: MCM2         |                                |                            |
|     | 28.9997 | 27.7548 | 28.5322 | 29.0572 | 28.2253 | 28.6613 | 26.6622 | 27.6644 | 26.9277 | 28.9073 | 28.7767 | 28.0506 | P25205;P25205-2   | P25205;P25205-2   | DNA replication li: MCM3         |                                |                            |
|     | 28.7376 | 27.9462 | 28.4787 | 28.7738 | 28.5841 | 28.6321 | 26.3173 | 27.0884 | 26.0731 | 28.7406 | 28.8303 | 28.304  | P33991;E5RG31;E   | P33991            | DNA replication li: MCM4         |                                |                            |
|     | 28.6704 | 27.6624 | 28.4664 | 28.6784 | 28.2996 | 28.6884 | 26.1266 | 26.7011 | 24.5838 | 28.7185 | 29.0574 | 28.1578 | P33992;B1AHB1;E   | P33992;B1AHB1     | DNA replication li: MCM5         |                                |                            |
|     | 28.1983 | 26.9247 | 27.8032 | 28.2745 | 27.5424 | 27.8626 | 25.875  | 26.5828 | 26.4183 | 28.5069 | 28.1559 | 27.658  | Q14566            | Q14566            | DNA replication li: MCM6         |                                |                            |
|     | 29.207  | 28.5581 | 29.4764 | 29.586  | 29.274  | 29.6846 | 27.4395 | 28.5563 | 27.7566 | 29.4575 | 29.6877 | 29.3167 | P33993;P33993-3   | P33993;P33993-3   | DNA replication li: MCM7         |                                |                            |
|     | 27.0664 | 26.2479 | 26.3406 | 26.8674 | 26.7622 | 26.48   | 25.6688 | 25.6958 | 23.9741 | 26.575  | 26.4448 | 26.1923 | Q9BTE3;Q9BTE3-;Q  | Q9BTE3;Q9BTE3-;Q  | Mini-chromosome MCMBP            |                                |                            |
|     | 27.674  | 27.8569 | 27.566  | 27.6356 | 27.5571 | 27.3444 | 28.0801 | 27.0339 | 26.1555 | 27.0616 | 27.2404 | 27.3075 | Q9ULC4;Q9ULC4- Q  | Q9ULC4;Q9ULC4- Q  | Malignant T-cell- a MCTS1        |                                |                            |
|     | 24.9822 | NaN     |         | 24.4987 | 24.6704 | NaN     |                   |                   |                                  |                                |                            |



|     |         |         |         |         |         |         |         |         |         |         |         |         |                                                                     |
|-----|---------|---------|---------|---------|---------|---------|---------|---------|---------|---------|---------|---------|---------------------------------------------------------------------|
|     | 28.8826 | 29.7269 | 28.7986 | 28.3721 | 29.5174 | 28.7297 | 28.6344 | 29.6733 | 30.5002 | 28.582  | 28.8954 | 29.7065 | P40926;G3XAL0;P P40926;G3XAL0;P Malate dehydrog MDH2                |
|     | 22.0951 | NaN     | P21741;E9PPJ5;E9 P21741;E9PPJ5;E9 Midkine MDK                       |
|     | 25.0669 | NaN     | 23.7155 | 25.4693 | NaN     | NaN     | NaN     | NaN     |         | 22.6723 | 22.9953 | NaN     | Q9NU22;Q5T795; Q9NU22 Midasin MDN1                                  |
|     | 24.2507 | 25.5383 | 24.9155 | 24.3764 | 25.1547 | 24.7952 | 25.4665 | 24.8542 | NaN     | 24.6582 | 24.6059 | 25.1582 | P48163;P48163-2 P48163;P48163-2 NADP-dependent ME1                  |
|     | 23.6003 | 23.0914 | 23.0425 | 23.7679 | 23.2142 | 23.1065 | NaN     | NaN     | NaN     | NaN     | NaN     | NaN     | P23368;P23368-2 P23368;P23368-2 NAD-dependent n ME2                 |
| NaN |         | 23.4282 | 23.4311 | 22.9366 | 23.1651 | NaN     | 22.9158 | 24.3863 | NaN     | 23.1834 | NaN     | NaN     | Q16626 Q16626 Male-enhanced a MEA1                                  |
|     | 23.8832 | NaN     | NaN     | 23.5509 | 23.7557 | NaN     | NaN     | NaN     | NaN     |         | 23.4456 | NaN     | Q15648;Q15648-3 Q15648;Q15648-3 Mediator of RNA i MED1              |
|     | 23.6367 | 24.1631 | 23.7029 | 23.8575 | 24.3327 | 23.8197 | NaN     | NaN     | NaN     | NaN     | 24.2541 | NaN     | Q9P086;I3L3E8;I3 Q9P086 Mediator of RNA i MED11                     |
| NaN | NaN     | NaN     | NaN     | 20.3558 | NaN     | Q93074;Q7Z3Z5;C Q93074;Q7Z3Z5;C Mediator of RNA i MED12;TNRC11      |
|     | 23.4212 | NaN     | NaN     | 23.3992 | NaN     | O60244;H7C3E5;F O60244 Mediator of RNA i MED14                      |
|     | 22.7555 | NaN     | 22.6704 | 23.7049 | 23.0272 | 23.0614 | NaN     | NaN     | NaN     | 22.5923 | NaN     | NaN     | Q96RN5;G3V1P5; Q96RN5;G3V1P5; Mediator of RNA i MED15               |
|     | 22.4791 | NaN     | NaN     | 22.7088 | NaN     | NaN     | NaN     | NaN     | NaN     | 22.0449 | NaN     | NaN     | Q9Y2X0;Q9Y2X0-; Q9Y2X0;Q9Y2X0-2 Mediator of RNA i MED16             |
|     | 24.0219 | 23.6728 | 23.1158 | 24.0936 | 23.5524 | NaN     | NaN     | NaN     | NaN     | 23.0997 | 23.4522 | NaN     | Q9NVC6;E9PJZ4;E Q9NVC6 Mediator of RNA i MED17                      |
|     | 24.6541 | 24.5612 | 24.4842 | 24.6058 | 24.9834 | 24.6144 | 24.103  | NaN     | NaN     | 24.59   | 24.8045 | NaN     | Q9BUE0 Q9BUE0 Mediator of RNA i MED18                               |
| NaN | NaN     | NaN     | NaN     | 20.4892 | NaN     | A0JLT2;J3KR33;A0 A0JLT2;J3KR33;A0 Mediator of RNA i MED19           |
|     | 24.5352 | 24.3693 | 24.3571 | 24.552  | 24.6301 | 24.5051 | NaN     | NaN     | NaN     | NaN     | NaN     | NaN     | Q9H944;B7ZBQ3; Q9H944;B7ZBQ3; Mediator of RNA i MED20               |
| NaN | NaN     | NaN     | NaN     | 21.8323 | NaN     | Q13503;F5H872 Q13503;F5H872 Mediator of RNA i MED21                 |
|     | 24.1831 | 24.2647 | 23.9545 | 24.768  | 24.1492 | NaN     | 23.2666 | NaN     | NaN     | 23.8704 | 24.0559 | NaN     | Q15528;E9PGW7; Q15528;E9PGW7; Mediator of RNA i MED22               |
|     | 23.2356 | 21.0736 | 22.1167 | 23.3847 | 22.0581 | 23.0616 | NaN     | NaN     | NaN     | 21.7656 | 21.3187 | NaN     | Q9ULK4;Q5JW72; Q9ULK4;Q5JW72; Mediator of RNA i MED23               |
|     | 21.4574 | NaN     | 21.6511 | 22.1339 | NaN     | O75448;F5GY88;A O75448;F5GY88;A Mediator of RNA i MED24             |
| NaN | NaN     | NaN     | 22.9449 | NaN     | Q6P2C8;Q6P2C8-; Q6P2C8;Q6P2C8- Mediator of RNA i MED27              |
|     | 21.7693 | NaN     | NaN     | NaN     | NaN     | 21.8614 | NaN     | NaN     | NaN     | NaN     | NaN     | NaN     | Q9NX70;B4DUA7; Q9NX70;B4DUA7; Mediator of RNA i MED29;IXL           |
|     | 22.65   | NaN     | Q96HR3;Q96HR3- Q96HR3;Q96HR3- Mediator of RNA i MED30               |
|     | 22.28   | NaN     | NaN     | 21.9426 | NaN     | Q9Y3C7;I3L2J1;I3I Q9Y3C7;I3L2J1 Mediator of RNA i MED31             |
| NaN |         | 21.2157 | NaN     | 22.2571 | NaN     | NaN     | NaN     | NaN     | NaN     | 21.4098 | NaN     | NaN     | Q9NPJ6;Q5T911;C Q9NPJ6;Q5T911 Mediator of RNA i MED4                |
|     | 22.8552 | 22.6759 | 22.4483 | 22.8624 | 22.9929 | 22.6239 | NaN     | NaN     | NaN     | 22.7575 | NaN     | NaN     | Q96G25;Q96G25- Q96G25;Q96G25- Mediator of RNA i MED8                |
| NaN | NaN     | NaN     | NaN     | 22.381  | NaN     | Q9NWA0 Q9NWA0 Mediator of RNA i MED9                                |
|     | 22.2029 | NaN     | 22.0884 | NaN     | Q14680;Q14680-; Q14680;Q14680-3 Maternal embryo MELK                |
|     | 24.2838 | 24.5183 | 24.2424 | 24.0552 | 24.6597 | 24.5369 | 24.4062 | NaN     | 24.6303 | 25.0132 | 24.6699 | 24.9757 | Q9Y316;Q9Y316-; Q9Y316;Q9Y316-3 Protein MEMO1 MEMO1                 |
|     | 24.8827 | 24.3413 | 24.5275 | 25.5408 | 24.9878 | 24.7752 | NaN     | NaN     | NaN     | 24.3486 | 24.6832 | 24.0755 | Q7L2J0;Q7L2J0-2 Q7L2J0;Q7L2J0-2 7SK snRNA methy MEPCE               |
| NaN | NaN     | NaN     | NaN     | 25.3838 | NaN     | Q12866;E9PHX8; Q12866;E9PHX8;F Tyrosine-protein i MERTK             |
|     | 23.5966 | 24.3026 | 23.8258 | 23.8216 | 24.2419 | 23.5464 | 24.4305 | 25.3398 | 24.8104 | 23.9186 | 24.2922 | NaN     | Q14696;H0YL4;Q Q14696 LDLR chaperone i MESDC2                       |
|     | 25.7268 | 25.6344 | 25.8575 | 25.3911 | 25.0564 | 25.6013 | 27.6598 | 25.97   | 25.7353 | 25.8511 | 24.9899 | 24.9901 | P08581;P08581-2 P08581;P08581-2 Hepatocyte growth MET               |
|     | 25.2504 | 24.9881 | 24.9224 | 25.4641 | 24.8351 | 25.2924 | 24.3224 | NaN     | NaN     | 24.9361 | 25.7451 | NaN     | P53582;H0Y955;H P53582;H0Y955 Methionine amin METAP1                |
|     | 26.9445 | 26.1246 | 26.5054 | 26.7659 | 25.8148 | 26.2309 | 26.6027 | 26.5172 | 25.9629 | 26.439  | 26.6682 | 26.543  | P50579;P50579-3 P50579;P50579-3 Methionine amin METAP2              |
| NaN | NaN     | NaN     | NaN     | NaN     | NaN     | NaN     | NaN     | NaN     | NaN     | 20.7471 | NaN     | NaN     | Q641Q3;Q641Q3- Q641Q3;Q641Q3- Meteorin-like protein METRNL          |
|     | 23.7349 | 22.8168 | 23.0073 | 23.654  | 23.0336 | 22.8841 | NaN     | NaN     | NaN     | 23.0104 | 22.9107 | 23.2169 | Q8N6R0;Q8N6R0- Q8N6R0;Q8N6R0- Methyltransferase METTL13             |
|     | 24.1023 | NaN     | 24.025  | 24.0972 | NaN     | 24.0185 | NaN     | NaN     | NaN     | NaN     | NaN     | NaN     | Q6P1Q9;Q6P1Q9- Q6P1Q9;Q6P1Q9- Methyltransferase METTL28             |
|     | 23.2522 | 22.8263 | 23.4788 | 23.3335 | 23.3657 | NaN     | NaN     | NaN     | NaN     | 23.5074 | 24.0318 | NaN     | Q86U44;F5H6D8;I Q86U44;F5H6D8;I N6-adenosine-methyl METTL3          |
| NaN | NaN     | NaN     | 24.6732 | 23.9412 | NaN     | NaN     | NaN     | NaN     | NaN     | NaN     | 23.1253 | NaN     | P55082;P55082-2 P55082;P55082-2 Microfibril-associated MFAP3;MFAP3L |
| NaN |         | 23.4262 | NaN     | 21.9679 | 22.5639 | NaN     | 22.6361 | NaN     | NaN     | NaN     | NaN     | 22.6836 | P55083;K7ES70;P P55083;K7ES70;P Microfibril-associated MFAP4        |
|     | 32.0223 | 32.7037 | 32.9592 | 31.6965 | 32.3618 | 32.9887 | 35.4069 | 34.3898 | 33.71   | 33.4996 | 32.6407 | 32.0428 | Q08431;F5GZN3;C Q08431;F5GZN3;C Lactadherin;Lactadherin MFGE8       |
|     | 25.9179 | 26.9775 | 28.326  | 26.167  | 26.7646 | 27.7614 | 23.2808 | NaN     | 24.4147 | 23.5081 | 24.0323 | 24.4651 | P08582;P08582-2 P08582 Melanotransferrin MFI2                       |
| NaN | NaN     | NaN     | NaN     | NaN     | NaN     | NaN     | NaN     | NaN     | 21.4972 | NaN     | NaN     | NaN     | O95140;O95140-2 O95140;O95140-2 Mitofusin-2 MFN2                    |
| NaN | NaN     | NaN     | NaN     | NaN     | NaN     | NaN     | NaN     | NaN     | NaN     | NaN     | NaN     | 23.7491 | Q9H3U5;Q9H3U5 Q9H3U5;Q9H3U5 Major facilitator s MFSD1               |
| NaN | NaN     | NaN     | NaN     | 21.6414 | NaN     | Q6ZSS7;H7C284 Q6ZSS7;H7C284 Major facilitator s MFSD6               |
| NaN | NaN     | NaN     | 22.3785 | 22.5172 | NaN     | Q8NHS3;E7ERQ4 Q8NHS3;E7ERQ4 Major facilitator s MFSD8               |
|     | 24.422  | 24.5185 | 25.0275 | 24.9843 | 24.8666 | 24.6306 | 24.7487 | NaN     | 24.7023 | 24.3084 | 23.3061 | 24.4978 | P26572;D6RF69;D P26572 Alpha-1,3-mannose MGAT1                      |
|     | 23.5523 | 23.2028 | 23.201  | 23.4725 | NaN     | 23.2397 | 24.1988 | NaN     | NaN     | 23.6282 | 23.3977 | NaN     | Q10469 Q10469 Alpha-1,6-mannose MGAT2                               |
| NaN | NaN     | NaN     | NaN     | NaN     | NaN     | NaN     | NaN     | NaN     | NaN     | 22.5777 | 21.879  | NaN     | Q9UQ53;Q9UQ53 Q9UQ53;Q9UQ53 Alpha-1,3-mannose MGAT4B                |
|     | 25.2402 | 24.7428 | 24.7985 | 25.0403 | 24.8376 | 24.7634 | 24.5671 | 25.2831 | 24.849  | 24.7893 | 24.8777 | 24.9433 | O60502;O60502-4 O60502;O60502-4 Protein O-GlcNAc MGEA5              |
|     | 23.3644 | 22.8391 | 23.2581 | 22.7656 | 22.3357 | 22.7678 | NaN     | NaN     | NaN     | 22.9119 | NaN     | NaN     | Q99685;A0A0C4D Q99685;A0A0C4D Monoglyceride lip MGLL                |
| NaN | NaN     | NaN     | NaN     | NaN     | 22.6461 | NaN     | Q9BQP7;Q5QPE7; Q9BQP7;Q5QPE7; Mitochondrial ger MGME1               |
| NaN | NaN     | NaN     | NaN     | 22.2598 | NaN     | O60291;O60291-3 O60291;O60291-3 E3 ubiquitin-protein MGRN1          |
| NaN |         | 23.028  | 23.6806 | 22.4339 | 23.9926 | NaN     | 22.7534 | 24.7064 | NaN     | NaN     | 23.0239 | NaN     | P10620;F5H7F6;F P10620;F5H7F6;F Microsomal glutathione MGST1        |
| NaN | NaN     | NaN     | NaN     | NaN     | NaN     | NaN     | 23.6703 | NaN     | NaN     | NaN     | NaN     | NaN     | Q99735;Q99735-2 Q99735;Q99735-2 Microsomal glutathione MGST2        |
| NaN | NaN     | NaN     | 25.8279 | 25.2437 | NaN     | NaN     | 25.7732 | NaN     | NaN     | NaN     | NaN     | NaN     | Q5JRA6;Q5JRA6-2 Q5JRA6;Q5JRA6-2 Melanoma inhibitory MIA3            |
|     | 24.4061 | 23.8343 | 23.8306 | 23.9305 | 23.3873 | 23.8655 | 23.8162 | NaN     | NaN     | 23.9224 | NaN     | NaN     | Q86YT6 Q86YT6 E3 ubiquitin-protein MIB1                             |
| NaN | NaN     | NaN     | NaN     | NaN     | NaN     | NaN     | NaN     | NaN     | NaN     | 21.7676 | NaN     | NaN     | Q29983;Q29983-3 Q29983;Q29983-3 MHC class I polypeptide MICA        |
|     | 24.7515 | 24.1485 | 23.477  | 23.776  | 23.6726 | 23.5696 | 27.116  | 26.9979 | NaN     | 25.3089 | 23.705  | NaN     | Q96QC4;A0A024F Q96QC4;A0A024RCL3;A0A024K11 MICA                     |



|     |         |         |         |         |         |         |         |         |         |         |         |         |                                                                  |
|-----|---------|---------|---------|---------|---------|---------|---------|---------|---------|---------|---------|---------|------------------------------------------------------------------|
|     | 22.3251 | 22.4843 | 22.9944 | 22.0223 | NaN     | NaN     | 23.0218 | NaN     | NaN     | 23.1174 | 23.3881 | NaN     | Q8TDZ2;Q8TDZ2-; Q8TDZ2;Q8TDZ2- Protein-methionir MICAL1          |
|     | 23.0103 | 22.3719 | 22.2706 | 22.5336 | 22.4035 | 22.4641 | NaN     | NaN     | NaN     | NaN     | 22.7989 | NaN     | O94851;O94851-5 O94851;O94851-5 Protein-methionir MICAL2         |
| NaN | NaN     | NaN     | 21.1504 | 21.1705 | NaN     | Q7RTP6;Q7RTP6-; Q7RTP6;Q7RTP6- Protein-methionir MICAL3          |
| NaN | NaN     | NaN     | NaN     | 21.4782 | NaN     | Q29980;A0A0G2J; Q29980;A0A0G2J; MHC class I polyp MICB           |
|     | 20.8335 | NaN     | Q9BPX6;F6XEV2;A Q9BPX6;F6XEV2;A Calcium uptake pr MICU1          |
| NaN | NaN     | NaN     | NaN     | 21.7891 | NaN     | Q8IYU8 Q8IYU8 Calcium uptake pr MICU2                            |
|     | 25.2882 | 24.7399 | 24.8848 | 25.5895 | 24.8201 | 24.772  | NaN     | NaN     | 23.9891 | 24.9365 | 24.224  | NaN     | O15344;C9J453;A; O15344;C9J453;A; E3 ubiquitin-prote MID1        |
|     | 28.642  | 29.9278 | 29.0962 | 28.5216 | 29.8295 | 29.1474 | 29.0265 | 29.5649 | 30.2216 | 28.8074 | 29.4355 | 30.4978 | P14174 P14174 Macrophage migr MIF                                |
|     | 24.1347 | 23.5612 | 23.3307 | 24.0941 | 23.5085 | 23.4986 | NaN     | NaN     | NaN     | 23.7887 | 24.5763 | NaN     | Q8IUF8;Q8IUF8-4 Q8IUF8;Q8IUF8-4 Bifunctional lysine MINA         |
|     | 25.0334 | 25.5877 | 26.2169 | 25.1444 | 25.6113 | 26.2599 | 25.2064 | NaN     | 25.2082 | 26.2272 | 26.0668 | 26.3694 | Q8N4C8;Q8N4C8- Q8N4C8;Q8N4C8- Misshapen-like kii MINK1           |
| NaN | NaN     | NaN     | NaN     | NaN     | NaN     | NaN     | 22.1693 | NaN     | NaN     | NaN     | NaN     | NaN     | Q9UNW1;Q9UNW Q9UNW1;Q9UNW Multiple inositol p MINPP1             |
| NaN | NaN     | NaN     | NaN     | 20.9386 | NaN     | Q9NXC5;Q9NXC5- Q9NXC5;Q9NXC5- WD repeat-contai MIOS              |
|     | 26.9497 | 27.7308 | 27.5247 | 26.6197 | 26.9698 | 27.4451 | 28.2272 | 27.5668 | 28.319  | 26.8681 | 26.5888 | 27.1299 | Q8WV92;B8ZZL5;I Q8WV92;B8ZZL5;I MIT domain-cont: MITD1           |
|     | 28.0756 | 28.6008 | 27.7942 | 28.035  | 28.1248 | 27.8633 | 26.6686 | 27.9658 | 26.443  | 26.9809 | 27.6844 | 27.6634 | P46013;A0A087W P46013;A0A087W Antigen KI-67 MKI67                |
| NaN | NaN     | NaN     | NaN     | 22.6205 | NaN     | P46013-2 P46013-2 Antigen KI-67 MKI67                            |
|     | 21.8231 | NaN     | NaN     | 21.9759 | 22.1426 | 22.0546 | NaN     | NaN     | NaN     | 21.8623 | 22.0408 | NaN     | Q9UL63;C9J7E8;Q Q9UL63;C9J7E8;Q Muskelin MKLN1                   |
|     | 25.6933 | 25.4161 | 25.7477 | 25.8754 | 25.2469 | 25.6911 | 25.6415 | 25.1683 | 25.9966 | 25.915  | 25.142  | 25.4757 | Q14165;F5H158;F Q14165;F5H158;H Malectin MLEC                    |
|     | 23.771  | 23.4259 | 23.3221 | NaN     | Q15773;F5H0Y3;Q Q15773;F5H0Y3 Myeloid leukemia MLF2              |
|     | 22.328  | NaN     | NaN     | 22.5682 | NaN     | P40692;HOY818;P P40692;HOY818;P DNA mismatch re MLH1             |
|     | 26.2606 | 25.4757 | 25.5934 | 25.7053 | 25.7437 | 25.1645 | 26.0421 | 24.0627 | 26.8989 | 27.0914 | 26.9965 | 26.9132 | Q8NB16;I3L2T9;Q Q8NB16;I3L2T9 Mixed lineage kin MLKL             |
|     | 26.5562 | 27.2182 | 27.736  | 26.5898 | 27.1795 | 27.6239 | 27.1311 | 24.8572 | 25.9019 | 27.9215 | 27.2942 | 27.0124 | J3KN01;P55196;P; J3KN01;P55196;P; Afadin MLLT4                   |
|     | 24.1343 | 24.11   | 24.0447 | 23.9877 | 24.0888 | NaN     | 24.0794 | NaN     | 23.844  | 24.391  | 24.3645 | 24.2295 | Q9BVC4;H3BM50 Q9BVC4;H3BM50; Target of rapamyc MLST8             |
|     | 23.3108 | 24.0691 | 23.2172 | 23.2795 | 23.9518 | 23.4237 | NaN     | NaN     | NaN     | 23.2748 | 23.2683 | NaN     | Q96EY8;S4R3P5;F Q96EY8;S4R3P5 Cob(ly)rinic acid a MMAB           |
| NaN | NaN     | NaN     | NaN     | NaN     | NaN     | NaN     | NaN     | NaN     | NaN     | NaN     | 19.8655 | NaN     | Q9Y4U1;A0A0C4C Q9Y4U1;A0A0C4C Methylmalonic ac MMACHC            |
| NaN | NaN     | NaN     | 23.8677 | 23.9216 | 23.8929 | NaN     | NaN     | NaN     | NaN     | 23.8969 | 23.7932 | NaN     | Q8N4V1;Q8N4V1- Q8N4V1;Q8N4V1- Membrane magni MMGT1               |
|     | 32.555  | 32.4644 | 31.0079 | 32.0583 | 32.0418 | 30.4405 | 31.9381 | 31.674  | 31.4772 | 29.8521 | 29.3218 | 30.3765 | P03956 P03956 Interstitial collagen MMP1                         |
|     | 29.2379 | 29.7529 | 30.1958 | 29.7372 | 29.6677 | 30.3292 | 30.0437 | 29.7421 | 30.4428 | 30.5421 | 30.0309 | 30.3807 | P50281;F8W1B7;C P50281 Matrix metallopro MMP14                   |
|     | 28.3687 | 26.212  | 26.743  | 28.264  | 26.3345 | 26.9141 | 26.6796 | 26.2912 | 25.4734 | 27.5739 | 26.933  | 24.9411 | Q96T76;Q96T76- Q96T76;Q96T76- E MM519 nucleotid MMS19            |
| NaN | NaN     | NaN     | NaN     | 20.8784 | NaN     | Q6ZRQ5;E2QRD4 Q6ZRQ5;E2QRD4 Protein MMS22-li MMS22L              |
| NaN | NaN     | NaN     | NaN     | 24.0313 | NaN     | NaN     | NaN     | NaN     | NaN     | 24.3357 | 23.5942 | NaN     | Q9BU76;Q9BU76- Q9BU76;Q9BU76- Multiple myelom MMTAG2             |
|     | 22.8601 | NaN     | 22.9816 | 23.0485 | 23.0322 | NaN     | NaN     | NaN     | NaN     | 22.8652 | 23.3938 | NaN     | P51948;P51948-2 P51948;P51948-2; CDK-activating kir MNAT1        |
|     | 26.5341 | 26.3752 | 26.843  | 25.9033 | 25.5099 | 26.1647 | 26.7388 | 25.033  | 25.3656 | 25.8804 | 25.9413 | 25.1216 | Q9H8S9;Q7L9L4;C Q9H8S9;Q7L9L4;C MOB kinase activ; MOB1A;MOB1B    |
| NaN | NaN     | 23.1512 | NaN     | A0A087WV58;Q7I A0A087WV58;Q7I MOB kinase activ; MOB2             |
|     | 25.1735 | NaN     | 25.0644 | 24.36   | NaN     | 24.6938 | 25.0292 | 24.7776 | 24.8916 | NaN     | NaN     | NaN     | Q96BX8;K7EPX7;K Q96BX8;K7EPX7;K MOB kinase activ; MOB3A          |
|     | 25.51   | 24.6022 | 24.9739 | 25.1116 | 24.6814 | 25.0914 | 24.0562 | 23.7179 | 23.65   | 24.0472 | 24.326  | 23.2929 | Q96EN8 Q96EN8 Molybdenum cofe MOCOS                              |
|     | 21.8423 | 22.1409 | 22.0699 | 22.0681 | 21.9345 | NaN     | Q9NZB8;Q9NZB8- Q9NZB8;Q9NZB8- Molybdenum cofe; MOC51             |
| NaN | NaN     | 23.4624 | NaN     | NaN     | 22.9899 | NaN     | NaN     | NaN     | NaN     | NaN     | NaN     | 23.2995 | O96033;E9PKT9 O96033;E9PKT9 Molybdopterin sy MOC52               |
|     | 22.4827 | 22.7054 | 22.6328 | 22.5323 | NaN     | NaN     | 22.5343 | NaN     | NaN     | 22.1891 | 22.4102 | 22.9466 | O96007 O96007 Molybdopterin sy MOC52                             |
|     | 26.0246 | 25.9064 | 26.0459 | 26.0021 | 26.2855 | 26.2883 | 25.7065 | 26.025  | 26.9888 | 25.5102 | 25.4352 | 25.6856 | Q13724;Q13724-; Q13724;Q13724-; Mannosyl-oligos MOGS             |
|     | 24.8455 | 23.4411 | 24.1511 | 24.8412 | 23.6352 | 24.2421 | 23.5237 | NaN     | 23.7685 | 24.349  | 24.3642 | 23.8482 | Q7Z3U7;Q7Z3U7- Q7Z3U7;Q7Z3U7- Protein MON2 ho MON2               |
|     | 21.6142 | NaN     | NaN     | 21.7007 | NaN     | NaN     | NaN     | NaN     | NaN     | 21.0386 | NaN     | NaN     | Q9Y6X9;Q9Y6X9-; Q9Y6X9;Q9Y6X9-; MORC family CW- MORC2            |
|     | 21.949  | NaN     | 21.9351 | 21.9654 | NaN     | NaN     | NaN     | NaN     | NaN     | 22.245  | 22.1878 | NaN     | Q14149 Q14149 MORC family CW- MORC3                              |
|     | 26.3832 | 24.9496 | 25.2275 | 26.5789 | 25.1346 | 25.3546 | 24.2458 | NaN     | NaN     | 24.8682 | 24.3012 | 23.5476 | Q9HCE1;Q5JRQ4; Q9HCE1;Q5JRQ4;C Putative helicase i MOV10         |
|     | 21.3983 | NaN     | 21.0731 | 21.2687 | NaN     | NaN     | NaN     | NaN     | NaN     | 23.464  | NaN     | NaN     | Q6UVY6;Q6UVY6- Q6UVY6;Q6UVY6- DBH-like monoox MOXD1              |
|     | 26.0868 | 24.8638 | 24.9742 | 25.8625 | 24.8175 | 25.1019 | NaN     | 25.5033 | NaN     | 25.5172 | NaN     | NaN     | O75352;J3Q548;I; O75352;J3Q548;I; Mannose-P-dolich MPDU1;HBEBP2B |
|     | 23.3148 | 22.7574 | 23.0482 | 22.8051 | 22.9614 | 22.9224 | NaN     | 23.767  | 23.2039 | 22.9317 | NaN     | NaN     | O75970;F5H1U9;C O75970;F5H1U9;C Multiple PDZ dom MPDZ            |
|     | 23.6981 | NaN     | 23.1799 | 23.6449 | 23.251  | NaN     | NaN     | 22.5865 | NaN     | 24.3805 | 25.0805 | NaN     | P29372;A2IDA3;P P29372;A2IDA3;P DNA-3-methylade MPG              |
| NaN | NaN     | NaN     | NaN     | 22.3313 | NaN     | O00566 O00566 U3 small nucleola MPHOSPH10                        |
|     | 23.9889 | 23.4108 | 23.7669 | 23.8332 | 23.6262 | NaN     | Q99547;H3B5B3;F Q99547;H3B5B3;F M-phase phospho MPHOSPH6         |
|     | 25.2176 | 24.8077 | 25.1281 | 25.1603 | 24.7754 | 25.4207 | 24.7112 | NaN     | 24.836  | 24.726  | 24.9976 | 24.7767 | P34949;H3BPB8;F P34949;H3BPB8;F Mannose-6-phosph MPI             |
|     | 23.3361 | 24.1319 | 24.092  | 23.7895 | 23.7238 | NaN     | 23.7517 | NaN     | NaN     | NaN     | NaN     | NaN     | Q14168;Q14168-; Q14168;Q14168-; MAGUK p55 subf; MPP2             |
|     | 22.6455 | NaN     | NaN     | 22.5007 | NaN     | NaN     | NaN     | NaN     | NaN     | 22.3129 | NaN     | NaN     | Q96JB8;F8WBH8; Q96JB8;F8WBH8; MAGUK p55 subf; MPP4               |
|     | 24.2186 | 24.4995 | 23.9646 | 23.805  | 24.1362 | NaN     | NaN     | NaN     | 24.256  | 23.6926 | 23.6177 | NaN     | Q8N3R9;Q8N3R9- Q8N3R9;Q8N3R9- MAGUK p55 subf; MPP5               |
|     | 28.3402 | 27.8269 | 28.303  | 28.0677 | 27.9883 | 28.2598 | 28.1859 | 26.7497 | 27.5485 | 29.2447 | 28.7544 | 28.6082 | Q9NZW5;B8ZZG1; Q9NZW5;B8ZZG1 MAGUK p55 subf; MPP6                |
|     | 24.7085 | 25.0382 | 24.4527 | 24.8633 | 24.821  | 24.7206 | 24.6234 | 24.8346 | 25.1917 | 25.7606 | 24.6378 | 25.2903 | Q6WCQ1;Q6WCQ Q6WCQ1;Q6WCQ Myosin phosphat; MPRIP                 |
|     | 26.759  | 26.1875 | 25.5859 | 25.6006 | 25.9685 | 25.5165 | 26.0604 | 25.7426 | 26.4759 | 26.5676 | 26.5047 | 26.4257 | P25325-2;P25325 P25325-2;P25325; 3-mercaptopyruv; MPST           |
|     | 27.103  | 26.754  | 27.2135 | 26.873  | 26.2966 | 27.0709 | 26.9328 | NaN     | 26.7858 | 26.8703 | 26.4771 | 26.0154 | O95297;O95297-; O95297;O95297-;2 Myelin protein ze; MPZL1        |
|     | 23.5495 | NaN     | O95297-3;Q9UEL; O95297-3;Q9UEL; Myelin protein ze; MPZL1         |
|     | 26.7955 | 26.5351 | 26.7086 | 26.9642 | 27.0693 | 26.5066 | 24.8999 | 24.7594 | 24.6086 | 25.9526 | 26.0194 | 25.4992 | P49959;F8W7U8;I P49959;F8W7U8;I Double-strand bre MRE11A         |
| NaN | NaN     | NaN     | 22.7869 | 23.0323 | NaN     | NaN     | NaN     | 23.1631 | NaN     | NaN     | 22.9438 | NaN     | Q9Y605;A0A087W Q9Y605;A0A087W MORF4 family-ass MRFAP1            |



|     |         |         |         |         |         |         |         |         |         |         |         |         |         |         |         |         |         |     |                  |                  |                                  |       |
|-----|---------|---------|---------|---------|---------|---------|---------|---------|---------|---------|---------|---------|---------|---------|---------|---------|---------|-----|------------------|------------------|----------------------------------|-------|
| NaN |         | 22.3981 | NaN     |         | NaN     |         | 22.2703 | NaN     |         | NaN     |         | NaN     |         | NaN     |         | 22.7967 | NaN     |     | Q9NV56           | Q9NV56           | MRG/MORF4L-bir                   | MRGBP |
|     | 23.1746 | NaN     |         | NaN     |         | 23.6183 | NaN     |         | NaN     |         | NaN     |         | NaN     |         | 23.3452 | 23.3724 | NaN     |     | Q9BV20;Q9BV20-   | Q9BV20;Q9BV20-   | Methylthioribose- MR1            |       |
|     | 22.1676 | NaN     |         | NaN     |         | 22.5387 | NaN     |         | NaN     |         | NaN     |         | NaN     |         | 24.1228 | NaN     |         | NaN | Q8NDA8;E9PHY8;   | Q8NDA8;E9PHY8;   | Maestro heat-like MR0H1          |       |
|     | 24.4125 | 24.1538 | 24.3756 |         | 25.0183 | 24.6149 |         | 24.0341 | NaN     | NaN     | NaN     | NaN     | NaN     | NaN     | 23.9655 | 23.6312 | NaN     |     | Q9BYD6;H0Y8N7    | Q9BYD6;H0Y8N7    | 39S ribosomal pro MRPL1          |       |
|     | 24.6946 | 24.2159 | 23.4206 |         | 24.9402 | 24.0779 |         | 24.3734 | NaN     | NaN     | NaN     | NaN     | NaN     | NaN     | 22.8871 | 22.7589 | 22.9636 |     | Q9Y3B7;Q9Y3B7-;  | Q9Y3B7;Q9Y3B7-;  | 39S ribosomal pro MRPL11         |       |
|     | 24.7443 | 24.4494 | 24.3949 |         | 25.3933 | 24.8469 |         | 24.6222 | NaN     | NaN     | NaN     | NaN     | NaN     | 23.8836 | 23.5132 | 23.7904 | 23.3577 |     | Q9BYD1;E5RIJ7;E  | Q9BYD1;E5RIJ7    | 39S ribosomal pro MRPL13         |       |
|     | 22.8888 | 22.8633 | 23.1959 |         | 24.1033 | 24.2212 |         | 23.2718 | NaN     |     | Q9P015;E5RHF4;E  | Q9P015;E5RHF4;E  | 39S ribosomal pro MRPL15         |       |
|     | 23.5581 | 23.5423 | 23.5327 |         | 23.9553 | 24.0847 |         | 23.4761 | NaN     | NaN     | NaN     | NaN     | NaN     | NaN     | 23.0367 | 22.9772 | NaN     |     | Q9NRX2;E9PKV2    | Q9NRX2;E9PKV2    | 39S ribosomal pro MRPL17         |       |
|     | 23.1426 | NaN     |         | NaN     |         | 23.1805 | NaN     |         | NaN     |         | NaN     |     | Q9H0U6           | Q9H0U6           | 39S ribosomal pro MRPL18         |       |
|     | 24.4288 | 23.3381 | 23.9349 |         | 25.2109 | 23.3123 |         | 24.1215 | NaN     | NaN     | NaN     | NaN     | NaN     | NaN     | 22.9744 | 23.0603 | NaN     |     | P49406;S4R3W9;†  | P49406;S4R3W9    | 39S ribosomal pro MRPL19         |       |
| NaN |         | NaN     |         | NaN     |         | NaN     |         | NaN     |         | NaN     |         | NaN     |         | NaN     | NaN     | NaN     | 20.1788 |     | Q5T653;C9IY40    | Q5T653;C9IY40    | 39S ribosomal pro MRPL2          |       |
| NaN |         | 22.6541 | 22.582  |         | 23.4072 | 22.7764 | NaN     |         | NaN     |         | NaN     |         | 23.1744 | NaN     |         | NaN     | NaN     |     | Q7Z2W9;F5H7V8;   | Q7Z2W9;F5H7V8;   | 39S ribosomal pro MRPL21         |       |
|     | 23.4656 | 23.1967 | 23.4749 |         | 23.9444 | 23.6726 |         | 23.3562 | NaN     | NaN     | NaN     | NaN     | NaN     | NaN     | 22.837  | 22.9411 | NaN     |     | Q9NWU5;E7ESL0;   | Q9NWU5;E7ESL0;   | 39S ribosomal pro MRPL22         |       |
|     | 22.449  | NaN     |         | NaN     |         | 23.0449 | NaN     |         | NaN     |         | NaN     |     | Q16540;H7C2P7;†  | Q16540;H7C2P7;†  | 39S ribosomal pro MRPL23         |       |
|     | 23.5404 | 23.4131 | 23.2223 |         | 23.9837 | 23.6153 |         | 23.3026 | NaN     | NaN     | NaN     | NaN     | NaN     | NaN     | 22.501  | 22.7982 | NaN     |     | Q96A35;X6RJ73;X  | Q96A35;X6RJ73    | 39S ribosomal pro MRPL24         |       |
| NaN |         | NaN     |         | NaN     |         | 21.7414 | NaN     |         | NaN     |         | NaN     |     | Q9P0M9;D6RAN8    | Q9P0M9;D6RAN8    | 39S ribosomal pro MRPL27         |       |
|     | 23.8905 | 23.2494 | 23.4968 |         | 24.2515 | 23.3277 |         | NaN     |     | P09001;H0Y9G6;E  | P09001;H0Y9G6;E  | 39S ribosomal pro MRPL3          |       |
| NaN |         | NaN     |         | NaN     |         | 22.5052 | NaN     |         | NaN     |         | NaN     |     | Q8TCC3;Q8TCC3-;  | Q8TCC3;Q8TCC3-;  | 39S ribosomal pro MRPL30         |       |
|     | 23.5323 | 22.4022 | 22.9949 |         | 23.1796 | 23.0269 | NaN     |         | NaN     |         | NaN     |     | Q9BZE1;S4R369;H  | Q9BZE1;S4R369;H  | 39S ribosomal pro MRPL37         |       |
|     | 23.9272 | 25.2287 | NaN     |         | 24.471  | 24.3674 | NaN     |         | NaN     |         | NaN     |     | Q96DV4;Q96DV4-   | Q96DV4           | 39S ribosomal pro MRPL38         |       |
|     | 25.7962 | 25.44   | 25.2499 |         | 26.0472 | 25.4251 |         | 25.3626 | NaN     | NaN     | NaN     | NaN     | 24.8523 | 25.3215 | 25.6221 | 25.6028 |         |     | Q9NYK5;Q9NYK5-   | Q9NYK5;Q9NYK5-   | 39S ribosomal pro MRPL39         |       |
|     | 23.0648 | NaN     |         | NaN     |         | 23.729  | 22.5425 |         | 22.724  | NaN     |     | Q9BYD3;K7ELQ0;†  | Q9BYD3;K7ELQ0;†  | 39S ribosomal pro MRPL4          |       |
| NaN |         | NaN     |         | NaN     |         | 22.6026 | 21.8519 | NaN     |         | NaN     |     | Q9NQ50           | Q9NQ50           | 39S ribosomal pro MRPL40         |       |
|     | 21.78   | NaN     |         | 22.7668 | NaN     |         | NaN     |         | NaN     |         | NaN     |     | Q8N983-4;Q8N98   | Q8N983-4;Q8N98   | 39S ribosomal pro MRPL43         |       |
|     | 22.2321 | NaN     |         | 22.1438 |         | 22.8644 | 21.7573 | NaN     |         | NaN     | NaN     | NaN     | NaN     | NaN     | 21.6284 | 21.6256 | NaN     |     | Q9H9J2           | Q9H9J2           | 39S ribosomal pro MRPL44         |       |
|     | 25.2895 | 24.8807 | 25.0078 |         | 25.5274 | 25.4989 |         | 25.0074 | 25.2118 | NaN     | NaN     | NaN     | NaN     | NaN     | 24.0382 | 24.111  | NaN     |     | Q9BRJ2;A0A087X;  | Q9BRJ2;A0A087X;  | 39S ribosomal pro MRPL45         |       |
|     | 24.7355 | 24.7873 | 24.6603 |         | 25.1902 | 24.6356 |         | 24.1692 | NaN     |         | 23.6281 | 23.7715 | 24.3193 | 23.9989 | 23.8985 |         |         |     | Q9H2W6;A0A087    | Q9H2W6           | 39S ribosomal pro MRPL46         |       |
|     | 24.2243 | 24.2544 | 23.9294 |         | 24.4601 | 24.3542 |         | 24.3288 | NaN     |         | NaN     | NaN     | NaN     | NaN     | 23.8017 | 23.9394 | NaN     |     | Q96GC5;F5H702;†  | Q96GC5;F5H702;†  | 39S ribosomal pro MRPL48         |       |
| NaN |         | NaN     |         | NaN     |         | 22.2753 | NaN     |         | NaN     |         | NaN     |     | Q13405;E9PI78;H  | Q13405;E9PI78;H  | 39S ribosomal pro MRPL49         |       |
|     | 22.0419 | NaN     |         | 22.0275 |         | 22.1757 | NaN     |         | NaN     |         | NaN     |     | Q8N5N7;Q8N5N7    | Q8N5N7;Q8N5N7    | 39S ribosomal pro MRPL50         |       |
|     | 23.4386 | NaN     |         | NaN     |         | 23.3588 | NaN     |         | NaN     |         | NaN     |     | P82912;P82912-2; | P82912;P82912-2; | 28S ribosomal pro MRPS11         |       |
|     | 23.3178 | NaN     |         | 21.7293 |         | 23.601  | NaN     |         | NaN     |         | NaN     |     | Q9Y3D3;A6ND22;   | Q9Y3D3;A6ND22;   | 28S ribosomal pro MRPS16         |       |
|     | 23.0925 | NaN     |         | NaN     |         | 23.2488 | NaN     |         | NaN     |         | NaN     |     | Q9Y2R5;E9PE17;†  | Q9Y2R5;E9PE17;†  | 28S ribosomal pro MRPS17;hCG_198 |       |
|     | 21.6224 | NaN     |         | NaN     |         | NaN     | NaN     |         | NaN     |         | NaN     |     | Q9Y676;A0A0G2J†  | Q9Y676;A0A0G2J†  | 28S ribosomal pro MRPS18B        |       |
|     | 23.9553 | 23.1335 | 23.4635 |         | 24.5241 | 23.8214 |         | 23.7424 | NaN     | NaN     | NaN     | 23.0892 | 22.6884 | 23.0613 | NaN     |         |         |     | Q9Y399;Q5T8A0    | Q9Y399           | 28S ribosomal pro MRPS2          |       |
| NaN |         | NaN     |         | NaN     |         | NaN     | NaN     |         | NaN     |         | NaN     | 20.6368 | NaN     | NaN     | NaN     | NaN     | NaN     |     | P82921;A0A075B-  | P82921;A0A075B-  | 28S ribosomal pro MRPS21         |       |
|     | 25.6362 | 25.6622 | 25.4559 |         | 25.9616 | 25.3029 |         | 25.4338 | NaN     |         | NaN     | 24.4792 | NaN     | NaN     | NaN     | NaN     | NaN     |     | P82650;G5E9W7;†  | P82650;G5E9W7;†  | 28S ribosomal pro MRPS22         |       |
|     | 23.0757 | 23.7262 | 23.6967 |         | 24.4672 | 23.9319 |         | 23.5258 | 22.7514 | 22.4649 | 23.4904 | 22.8455 | 23.4449 | 22.7846 |         |         |         |     | Q9Y3D9;J3QLR8    | Q9Y3D9;J3QLR8    | 28S ribosomal pro MRPS23         |       |
|     | 24.5179 | 23.949  | 24.4167 |         | 25.5179 | 24.4753 |         | 24.2481 | 23.6865 | NaN     | NaN     | 23.3801 | 23.9166 | NaN     |         |         |         |     | P82663;E7EPW2;†  | P82663;E7EPW2;†  | 28S ribosomal pro MRPS25         |       |
|     | 23.7253 | NaN     |         | 24.2451 |         | 24.1479 | NaN     |         | NaN     |         | NaN     |     | Q9BYN8           | Q9BYN8           | 28S ribosomal pro MRPS26         |       |
|     | 24.6629 | 23.4182 | 24.0588 |         | 25.0888 | 23.4701 |         | 23.1073 | NaN     | NaN     | NaN     | 23.3846 | 23.3472 | 23.4064 | NaN     |         |         |     | Q92552;G5EA06;†  | Q92552;G5EA06;†  | 28S ribosomal pro MRPS27         |       |
|     | 23.0908 | 22.6008 | 22.4577 |         | 22.8449 | 23.0717 | NaN     |         | NaN     |         | 23.0827 | NaN     | NaN     | NaN     | NaN     | NaN     | NaN     |     | Q9Y2Q9;H0YAT2;†  | Q9Y2Q9;H0YAT2;†  | 28S ribosomal pro MRPS28         |       |
| NaN |         | NaN     |         | NaN     |         | 23.6696 | NaN     |         | NaN     |         | NaN     |     | Q9NP92;A0A087V   | Q9NP92;A0A087V   | 28S ribosomal pro MRPS30         |       |
|     | 21.985  | NaN     |         | 21.9682 |         | 22.9808 | NaN     |         | NaN     |         | NaN     |     | Q92665           | Q92665           | 28S ribosomal pro MRPS31         |       |
|     | 24.6138 | 23.4854 | 24.1391 |         | 25.1949 | 24.0885 |         | 24.2733 | NaN     | NaN     | NaN     | NaN     | 23.9638 | 23.6822 | NaN     |         |         |     | P82930;A0A087W   | P82930;A0A087W   | 28S ribosomal pro MRPS34         |       |
| NaN |         | NaN     |         | NaN     |         | NaN     | NaN     |         | NaN     |         | NaN     | NaN     | NaN     | NaN     | 20.8777 | NaN     |         |     | P82673;H0YG82;†  | P82673;H0YG82;†  | 28S ribosomal pro MRPS35         |       |
|     | 23.001  | 24.4245 | 23.7542 | NaN     |         | 24.5349 | 23.5201 | NaN     |         | 25.0457 | 25.6407 | NaN     | 22.8169 | 23.9888 |         |         |         |     | P82909           | P82909           | 28S ribosomal pro MRPS36         |       |
|     | 23.9362 | NaN     |         | NaN     |         | 22.4317 | NaN     |         | NaN     |         | NaN     |     | P82675;P82675-2  | P82675           | 28S ribosomal pro MRPS5          |       |
| NaN |         | 23.3676 | 23.5986 |         | 23.7385 | 23.636  |         | 23.327  | NaN     |     | P82932           | P82932           | 28S ribosomal pro MRPS6          |       |
|     | 23.5293 | 23.3807 | 23.3199 |         | 23.8664 | 23.5341 |         | 23.5139 | NaN     | NaN     | NaN     | 23.3061 | NaN     | NaN     | NaN     | NaN     | NaN     |     | Q9Y2R9;J3QLS3;†  | Q9Y2R9;J3QLS3;†  | 28S ribosomal pro MRPS7          |       |
|     | 21.7162 | NaN     |         | NaN     |         | NaN     | NaN     |         | NaN     |         | NaN     |     | P82933           | P82933           | 28S ribosomal pro MRPS9          |       |
|     | 29.4873 | 26.4417 | 27.8909 |         | 29.6178 | 27.2385 |         | 28.0495 | 25.0844 | 23.821  | 23.3545 | 27.6476 | 25.8949 | 25.5219 |         |         |         |     | Q9UKD2           | Q9UKD2           | mRNA turnover pi                 | MRT04 |
|     | 28.0763 | 26.4371 | 27.4084 |         | 28.2567 | 27.4153 |         | 27.5774 | 25.0944 | 25.1672 | 24.7973 | 27.5374 | 27.4003 | 26.498  |         |         |         |     | P43246;P43246-2  | P43246;P43246-2  | DNA mismatch re                  | MSH2  |
|     | 23.6004 | NaN     |         | 22.9076 |         | 23.3276 | 23.1534 |         | 23.375  | NaN     | NaN     | NaN     | 23.1043 | 23.3284 | NaN     |         |         |     | P20585           | P20585           | DNA mismatch re                  | MSH3  |
|     | 27.6986 | 26.2262 | 27.1765 |         | 27.9731 | 26.949  |         | 27.2717 | NaN     |         | 25.9091 | 24.1145 | 27.0909 | 27.4699 | 26.5848 |         |         |     | P52701;P52701-3  | P52701;P52701-3  | DNA mismatch re                  | MSH6  |
| NaN |         | NaN     |         | NaN     |         | NaN     | NaN     |         | NaN     |         | NaN     | 21.3904 | NaN     | NaN     |         |         |         |     | L15800;D6RDP9;†  | L15800;D6RDP9;†  | Methylsterol mon                 | MSM01 |
|     | 34.6346 | 35.     |         |         |         |         |         |         |         |         |         |         |         |         |         |         |         |     |                  |                  |                                  |       |



|     |         |         |         |         |         |            |         |         |         |         |         |         |                                                                 |
|-----|---------|---------|---------|---------|---------|------------|---------|---------|---------|---------|---------|---------|-----------------------------------------------------------------|
|     | 27.5594 | 26.6498 | 26.8968 | 27.649  | 26.8926 | 27.1145    | 25.9197 | 26.4724 | 25.7359 | 27.1634 | 27.413  | 26.9148 | Q94776;Q94776-1 Q94776;Q94776-2 Metastasis-associ MTA2          |
|     | 23.6032 | 24.0261 | 24.3815 | 24.2651 | 24.6401 | 24.074 NaN | NaN     | NaN     | NaN     | 23.8563 | 23.9457 | NaN     | Q9BTC8;Q9BTC8-1 Q9BTC8;Q9BTC8- Metastasis-associ MTA3           |
| NaN | NaN     | NaN     | 24.2351 | NaN     | 22.5926 | 23.8609    | NaN     | NaN     | NaN     | NaN     | NaN     | NaN     | Q13126;J3Q5B7;B Q13126;J3Q5B7-B S-methyl-5-thioad ATP           |
| NaN | NaN     | NaN     | NaN     | 23.2144 | NaN     | NaN        | NaN     | NaN     | NaN     | NaN     | NaN     | NaN     | P00846 P00846 ATP synthase subu MT ATP6                         |
|     | 23.9429 | 24.2153 | 23.9822 | 24.1217 | 24.2648 | 24.2227    | 23.6824 | 24.8146 | 25.8835 | 23.4817 | 23.8338 | 23.6492 | Q9Y6C9;E9PIE4 Q9Y6C9;E9PIE4 Mitochondrial car MTCH2             |
|     | 26.0083 | 24.3144 | 25.06   | 25.1737 | 24.096  | 23.7691    | 24.5298 | NaN     | NaN     | 24.1957 | 23.0775 | NaN     | Q9Y4B5;Q9Y4B5-1 Q9Y4B5;Q9Y4B5-2 Microtubule cross MTCL1         |
|     | 24.9442 | 24.887  | 25.5025 | 25.2774 | 24.9937 | 25.4129    | 24.088  | 25.2866 | 26.8901 | 23.5634 | 23.5849 | 25.5198 | P00403 P00403 Cytochrome c oxid MT-CO2                          |
|     | 25.1045 | 24.2874 | 24.5056 | 24.7137 | 24.3917 | 24.3459    | 23.9348 | NaN     | NaN     | 24.6701 | 23.785  | 23.7043 | 24.1791 Q86UE4;E5RJU9;F Q86UE4;E5RJU9 Protein LYRIC MTDH        |
|     | 32.6601 | 32.1382 | 32.0761 | 32.3738 | 32.3885 | 32.1157    | 31.9197 | 32.3287 | 32.0609 | 32.8169 | 32.86   | 32.2589 | P11586;F5H2F4;V P11586;F5H2F4 C-1-tetrahydrofoli MTHFD1         |
|     | 27.0976 | 26.0625 | 26.1927 | 27.5891 | 25.7397 | 25.6968    | 22.8733 | 24.4264 | 23.5128 | 25.5837 | 25.5266 | NaN     | A0A087WVM4;B7 A0A087WVM4;B7 Monofunctional C MTHFD1L            |
| NaN | NaN     | NaN     | NaN     | 23.1248 | NaN     | NaN        | NaN     | NaN     | NaN     | NaN     | NaN     | NaN     | P13995;B9A062;B P13995;B9A062;B Bifunctional meth MTHFD2        |
|     | 23.3724 | 23.0757 | 22.9593 | 24.3558 | 23.4457 | 23.4278    | NaN     | NaN     | NaN     | NaN     | NaN     | NaN     | P46199;H7C213 P46199;H7C213 Translation initiati MTIF2          |
|     | 21.8108 | NaN     | 22.8552 | 21.7425 | 21.7663 | NaN        | NaN     | NaN     | NaN     | 22.7285 | 23.0384 | NaN     | Q13496;Q13496-1 Q13496;Q13496-2 Myotubularin MTM1               |
|     | 24.2014 | 23.9942 | 24.6766 | 23.8518 | 24.1555 | 24.4601    | 23.6536 | NaN     | NaN     | 24.4421 | 24.0803 | 24.0333 | Q13613;F8WA39; Q13613;F8WA39; Myotubularin-rela MTMR1           |
| NaN | NaN     | NaN     | 22.5059 | 22.4627 | 23.0588 | 22.7187    | NaN     | NaN     | NaN     | 22.4784 | 23.386  | NaN     | Q9C011;Q9C011-3; Q9C011;Q9C011-3; Myotubularin-rela MTMR12      |
|     | 21.4503 | NaN     | NaN     | NaN     | NaN     | NaN        | NaN     | NaN     | NaN     | NaN     | NaN     | NaN     | Q8NCE2;Q8NCE2- Q8NCE2;Q8NCE2- Myotubularin-rela MTMR14          |
| NaN | NaN     | NaN     | 22.9513 | NaN     | NaN     | NaN        | NaN     | NaN     | NaN     | NaN     | NaN     | NaN     | Q13614;C9JEX3;Q Q13614;C9JEX3;Q Myotubularin-rela MTMR2         |
|     | 22.7545 | NaN     | NaN     | NaN     | NaN     | NaN        | NaN     | NaN     | NaN     | NaN     | NaN     | NaN     | Q9NYA4;J3QR65;J Q9NYA4;J3QR65 Myotubularin-rela MTMR4           |
|     | 23.1879 | NaN     | 22.9562 | 23.1541 | NaN     | NaN        | NaN     | NaN     | NaN     | 23.2912 | NaN     | NaN     | Q9Y217;Q9Y217-2 Q9Y217;Q9Y217-2 Myotubularin-rela MTMR6         |
|     | 27.8955 | 26.8311 | 27.7452 | 27.9675 | 27.1373 | 27.7612    | 27.073  | 26.5995 | 26.4867 | 27.6308 | 27.3906 | 27.4847 | P42345;B1AKP8;B P42345 Serine/threonine- MTR                    |
|     | 23.0882 | NaN     | NaN     | 23.3987 | NaN     | NaN        | NaN     | NaN     | NaN     | NaN     | NaN     | NaN     | Q9NVV4-2;Q9NVV Q9NVV4-2;Q9NVV Poly(A) RNA polyn MTPAP           |
|     | 26.475  | 27.2108 | 26.8514 | 26.1213 | 26.5976 | 26.576     | 26.2227 | 26.5786 | 27.1728 | 26.9825 | 26.8099 | 27.3348 | P58546;C9JL85 P58546;C9JL85 Myotrophin MTPN                     |
|     | 23.8667 | 23.153  | 23.5152 | 23.5316 | 22.7509 | 22.9861    | 22.0213 | 23.1708 | NaN     | 22.7137 | 22.6089 | NaN     | Q99707;Q99707-1 Q99707;Q99707-2 Methionine synth MTR            |
|     | 23.4536 | NaN     | 23.2541 | 23.4715 | NaN     | NaN        | NaN     | NaN     | NaN     | 23.4339 | NaN     | NaN     | Q9UBK8;Q9UBK8 Q9UBK8;Q9UBK8 Methionine synth MTRR               |
| NaN | NaN     | 23.5286 | 23.1556 | NaN     | 23.3727 | NaN        | NaN     | NaN     | NaN     | NaN     | NaN     | NaN     | O75431;O75431-2 O75431;O75431-2 Metaxin-2 MTX2                  |
|     | 23.5081 | 23.5803 | 23.944  | 24.0891 | 23.6687 | 23.266     | NaN     | NaN     | NaN     | NaN     | NaN     | NaN     | P22033 P22033 Methylmalonyl-Cr MUT                              |
|     | 25.0491 | 26.0748 | 25.5955 | 25.0656 | 25.4991 | 25.6082    | 25.8566 | 26.0714 | 26.6976 | 24.6545 | 24.7508 | 25.8934 | Q96EY5;Q96EY5-2 Q96EY5;Q96EY5-2 Multivesicular box MVB12A       |
|     | 24.9866 | 24.8162 | 24.6726 | 24.4717 | 24.4561 | 24.5228    | 25.6787 | 25.0418 | 25.5919 | 25.8982 | 25.5337 | 25.5224 | P53602;H3BP35;A P53602;H3BP35 Diphosphomevalc MVD               |
|     | 25.4085 | 23.9883 | 24.7179 | 25.1215 | 24.0276 | 24.5462    | 24.7154 | NaN     | 24.137  | 25.628  | 25.7313 | 23.9775 | Q03426;F5H8H2;F Q03426;F5H8H2-C-Myc Mevalonate kinas MKV        |
|     | 29.1308 | 30.075  | 29.4687 | 28.7667 | 29.9979 | 29.3976    | 29.556  | 30.0492 | 30.7363 | 29.7513 | 29.1064 | 30.1489 | Q14764;H3BQK6;J Q14764 Major vault prote MVP                    |
| NaN | NaN     | NaN     | NaN     | NaN     | NaN     | NaN        | NaN     | NaN     | NaN     | 21.2692 | NaN     | NaN     | P20591;F8W8T1;F P20591;F8W8T1;F Interferon-induce MX1           |
|     | 24.1599 | 23.3596 | 24.0396 | 23.6174 | 22.7191 | 23.812     | 23.8123 | NaN     | NaN     | 23.6772 | NaN     | NaN     | P84157-2;K7EQX8 P84157-2;K7EQX8 Matrix-remodeling MXRA7         |
|     | 25.6245 | 24.6497 | 25.1415 | 25.168  | 24.3146 | 24.6429    | 24.5473 | 23.665  | NaN     | 24.639  | 24.2224 | 24.426  | Q96597;C9JJV6;C Q96597;C9JJV6;C Myeloid-associate MYADM         |
|     | 28.2218 | 26.4872 | 27.1741 | 28.8246 | 27.2781 | 27.1972    | 25.2475 | 25.4035 | 24.3884 | 27.4955 | 27.6494 | 26.1009 | Q9BQG0;Q9BQGC Q9BQG0;Q9BQGC Myb-binding prot MYBBP1A            |
|     | 25.4049 | 25.9621 | 25.1483 | 25.2206 | 25.1002 | 25.2323    | 26.0035 | NaN     | 25.1658 | 25.0199 | 25.168  | NaN     | Q99417;A0A087W Q99417;A0A087W C-Myc-binding prc MYCBP           |
|     | 27.4562 | 28.2454 | 26.9085 | 26.2918 | 26.5348 | 25.7896    | 26.5607 | NaN     | 26.3427 | 25.6755 | 26.9431 | NaN     | O75592;O75592-2 O75592;O75592-2 E3 ubiquitin-prote MYCBP2       |
|     | 24.5551 | 24.2426 | 24.1987 | 24.082  | 24.281  | 24.5345    | 24.6072 | NaN     | 23.8183 | 25.143  | 25.2766 | NaN     | Q99836;A0A0A0N Q99836;A0A0A0N Myeloid differenti MYD88          |
|     | 27.0156 | 28.398  | 27.4507 | 27.1022 | 28.0437 | 27.6601    | 27.4587 | 28.6301 | 28.6401 | 27.7588 | 27.7409 | 27.3032 | Q969H8;M0QXF7 Q969H8;M0QXF7 Myeloid-derived g MYDGF             |
|     | 24.1648 | 24.2971 | 24.2888 | 24.3322 | 24.4611 | 24.3941    | NaN     | NaN     | NaN     | 23.1334 | 24.4753 | 24.9253 | A0A0A0MR39;Q9I A0A0A0MR39;Q9I Myelin expressor MYEF2            |
|     | 30.2291 | 29.9471 | 30.4555 | 30.9006 | 30.2583 | 30.7222    | 30.3444 | 30.7351 | 30.4096 | 30.5062 | 30.6357 | 30.532  | P35580;P35580-3 P35580;P35580-3 Myosin-10 MYH10                 |
|     | 25.936  | 26.9835 | 27.5241 | 27.135  | 27.3322 | 27.8037    | 25.5187 | 25.696  | 26.5364 | 26.6181 | 26.919  | 26.723  | Q7Z406;Q7Z406- E Q7Z406;Q7Z406-6 Myosin-14 MYH14                |
|     | 34.7368 | 34.4714 | 35.0216 | 35.0841 | 34.6543 | 35.2916    | 34.3499 | 34.592  | 34.1747 | 34.2682 | 34.3607 | 34.244  | P35579;P35579-2 P35579;P35579-2 Myosin-9 MYH9                   |
|     | 29.8174 | 29.6078 | 29.393  | 29.5654 | 29.2001 | 29.3886    | 29.2201 | 28.5993 | 28.0073 | 29.0234 | 28.8165 | 28.4654 | O14950;P19105;J O14950;P19105;J Myosin regulatory MYL12B;MYL12A |
|     | 28.736  | 29.3339 | 28.9046 | 28.6817 | 28.9273 | 29.3526    | 29.3376 | 28.7748 | 27.6271 | 29.2183 | 28.8903 | 28.5166 | P08590;P05976;P P08590;P05976;P Myosin light chair MYL3;MYL1    |
|     | 31.7778 | 32.7577 | 32.4568 | 31.9554 | 32.9336 | 32.3771    | 31.8837 | 32.5998 | 31.8944 | 32.3851 | 32.3668 | 32.3759 | P60660;F8W1R7;J P60660;F8W1R7;J Myosin light poly MYL6          |
| NaN | NaN     | NaN     | NaN     | 21.4654 | NaN     | NaN        | NaN     | NaN     | NaN     | NaN     | NaN     | NaN     | P60660-2;G8JLA2; P60660-2;G8JLA2 Myosin light poly MYL6         |
| NaN | NaN     | NaN     | 22.4658 | NaN     | 23.6438 | NaN        | NaN     | NaN     | NaN     | 22.5318 | NaN     | NaN     | P14649;F8W1I5 P14649;F8W1I5 Myosin light chair MYL6B            |
|     | 23.9088 | 24.3867 | 24.3884 | 24.0263 | NaN     | NaN        | NaN     | NaN     | NaN     | 23.0267 | NaN     | NaN     | P24844;P24844-2 P24844;P24844-2 Myosin regulatory MYL9          |
|     | 24.0599 | NaN     | 24.1958 | 24.1365 | 24.4438 | 24.4767    | NaN     | NaN     | NaN     | NaN     | NaN     | NaN     | Q15746;Q15746- E Q15746;Q15746- E Myosin light chair MYLK       |
|     | 24.5249 | 23.7285 | 25.8818 | 24.6317 | 24.2576 | 25.2554    | 27.1142 | 26.2583 | 26.3316 | 25.5685 | 24.8495 | 24.4999 | Q9HD67;A0A0A0I Q9HD67;A0A0A0I Unconventional r MYO10            |
|     | 25.225  | 24.3339 | 26.1746 | 25.5827 | 25.3459 | 26.3608    | 24.0307 | 24.3063 | NaN     | 26.0641 | 25.9494 | 24.6919 | Q92614;Q92614- Q92614;Q92614-4 Unconventional r MYO18A          |
| NaN | NaN     | NaN     | NaN     | NaN     | NaN     | NaN        | NaN     | NaN     | NaN     | NaN     | NaN     | 22.7816 | Q8IUG5;A0A075B Q8IUG5;A0A075B Unconventional r MYO18B           |
|     | 30.1328 | 30.1285 | 30.9883 | 30.6285 | 30.4061 | 31.3456    | 29.9523 | 29.459  | 29.9114 | 31.2695 | 30.9307 | 30.8593 | O43795;E9PDF6;E O43795;E9PDF6 Unconventional r MYO1B            |
|     | 25.3817 | 25.3421 | 25.8888 | 25.461  | 25.4386 | NaN        | NaN     | NaN     | 25.8526 | 26.6975 | 26.0976 | NaN     | O00159-2;J3L204; O00159-2 Unconventional r MYO1C                |
|     | 31.8946 | 31.8363 | 32.7763 | 32.1047 | 32.1098 | 33.0447    | 32.0634 | 31.7794 | 31.9792 | 33.0575 | 32.7388 | 32.7208 | O00159-3;O0015 E O00159-3;O0015 E Unconventional r MYO1C        |
|     | 28.0399 | 27.6077 | 28.4531 | 27.9409 | 27.1967 | 28.0654    | 26.1752 | 24.5133 | 26.3222 | 27.5069 | 26.9287 | 26.4753 | O94832;J3QRN6;K O94832;J3QRN6;K Unconventional r MYO1D          |
|     | 27.4026 | 26.4155 | 27.1527 | 27.2183 | 26.3987 | 26.8551    | 25.7457 | 25.6771 | 25.3644 | 26.4221 | 26.466  | 26.3452 | Q12965;H0YNQ8;Q Q12965 Unconventional r MYO1E                   |
|     | 25.9779 | 25.5347 | 26.1432 | 26.1473 | 25.4654 | 25.9958    | 25.5356 | 26.0832 | 25.8526 | 25.5976 | 25.7885 | 25.9154 | Q9Y4I1;G3V394;F Q9Y4I1;G3V394;F Unconventional r MYO5A          |
|     | 24.0883 | NaN     | 24.2348 | 24.0488 | 24.1572 | 24.1451    | NaN     | NaN     | NaN     | NaN     | NaN     | NaN     | Q9NQX4;Q9NQX4 Q9NQX4 Unconventional r MYO5C                     |
|     | 28.8983 | 28.4728 | 28.9189 | 29.1832 | 28.5772 | 29.0687    | 29.0149 | 28.605  | 28.9013 | 29.1345 | 29.0486 | 28.7919 | A0A0A0MRM8;Q E A0A0A0MRM8;Q E Unconventional r MYO6             |



|     |         |         |         |         |         |         |         |         |         |         |         |         |                                                                  |
|-----|---------|---------|---------|---------|---------|---------|---------|---------|---------|---------|---------|---------|------------------------------------------------------------------|
|     | 25.6426 | 25.5146 | 26.1821 | 26.269  | 25.1058 | 25.53   | 25.3536 | 23.1793 | 24.6468 | 25.7536 | 25.1444 | 25.6568 | Q13459;M0R0P8; Q13459;M0R0P8; Unconventional n MYO9B             |
|     | 33.5011 | 32.819  | 33.2586 | 33.7369 | 32.804  | 33.4389 | 32.5976 | 32.1158 | 32.1211 | 33.4725 | 32.7669 | 32.4335 | Q9NZM1;Q9NZM: Q9NZM1;Q9NZM: Myoferlin MYOF                       |
| NaN | NaN     | NaN     | NaN     | 21.0978 | NaN     | Q6NZ67;Q6P582; Q6NZ67;Q6P582; Mitotic-spindle or MZT2B;MZT2A     |
|     | 26.9004 | 27.4647 | 26.7621 | 26.8701 | 27.4983 | 26.9971 | 26.7528 | 27.7498 | 27.439  | 27.247  | 27.7009 | 27.6999 | P41227;P41227-2, P41227;P41227-2, N-alpha-acetyltrai NAA10;NAA11 |
|     | 29.1164 | 28.2026 | 28.5048 | 28.7733 | 28.5397 | 28.5099 | 28.4494 | 28.8867 | 28.8139 | 29.1088 | 29.2639 | 28.7896 | Q9BXJ9;A0A0B4J1 Q9BXJ9;A0A0B4J1 N-alpha-acetyltrai NAA15         |
|     | 24.8121 | 23.6834 | 24.1356 | 24.6246 | 23.6612 | 24.2753 | NaN     | NaN     | NaN     | 23.3836 | 23.7458 | NaN     | Q6N069;Q6N069- Q6N069 N-alpha-acetyltrai NAA16                   |
|     | 23.1828 | 23.9864 | 23.5699 | 24.3344 | 24.0251 | 23.7066 | 23.1934 | NaN     | NaN     | NaN     | 23.6387 | 24.0846 | P61599;A8MZB2; P61599;A8MZB2 N-alpha-acetyltrai NAA20            |
|     | 23.8295 | 24.0846 | 23.9965 | 23.8154 | 24.1612 | 23.4458 | 24.6155 | 24.2104 | 24.7131 | 23.957  | 24.1219 | 23.733  | Q14CX7;Q14CX7- Q14CX7; Q14CX7-; N-alpha-acetyltrai NAA25         |
|     | 24.6467 | 23.9571 | 24.095  | 24.5482 | 23.8778 | 24.0924 | NaN     | NaN     | NaN     | 24.2867 | 24.2165 | NaN     | Q147X3;Q147X3-; Q147X3;Q147X3-; N-alpha-acetyltrai NAA30         |
|     | 26.5419 | 25.1448 | 25.6431 | 26.2282 | 25.5923 | 25.1644 | 25.0604 | 23.8531 | 25.2322 | 26.7327 | 26.6638 | 25.5057 | Q5VZE5;Q5VZE5-; Q5VZE5 N-alpha-acetyltrai NAA35                  |
| NaN | NaN     | NaN     | NaN     | 22.1811 | NaN     | Q86UY6;Q86UY6- Q86UY6;Q86UY6- N-alpha-acetyltrai NAA40           |
|     | 25.8944 | 25.8936 | 25.9468 | 25.7446 | 26.0339 | 25.6269 | 25.5662 | 25.7596 | 26.9093 | 25.9121 | 26.2538 | 26.3895 | Q9GZZ1;Q9GZZ1-; Q9GZZ1;Q9GZZ1-; N-alpha-acetyltrai NAA50         |
|     | 27.5075 | 26.7427 | 27.0506 | 27.4574 | 26.3922 | 26.9719 | 27.2034 | 26.9519 | 25.8631 | 27.5092 | 27.0315 | 26.4195 | E9PAV3;F8VJ2;H E9PAV3;F8VJ2;H Nascent polypept NACA              |
|     | 22.464  | NaN     | Q96RE7;K7ENW4 Q96RE7;K7ENW4 Nucleus accumb ACC1                  |
|     | 24.9214 | 23.8848 | 23.3182 | 24.3288 | 24.3444 | 23.4291 | NaN     | NaN     | NaN     | 24.0027 | 24.2468 | NaN     | Q4G0N4;Q4G0N4 Q4G0N4;Q4G0N4 NAD kinase 2, mit NADK2              |
|     | 21.1935 | NaN     | NaN     | 21.249  | NaN     | Q6IA69;H0YQC6; Q6IA69;H0YQC6; Glutamine-depen NADSYN1            |
|     | 25.4396 | 25.8726 | 25.6664 | 25.6768 | 26.0994 | 26.0217 | 25.9873 | 25.4928 | 25.3833 | 26.3715 | 26.6216 | 26.3884 | Q13564;Q13564- Q13564; Q13564-4 NEDD8-activating NAE1            |
| NaN | NaN     | NaN     | NaN     | 21.0354 | NaN     | Q96HR8;Q96HR8- Q96HR8;Q96HR8- H/ACA ribonucleo NAF1              |
| NaN | NaN     | NaN     | NaN     | NaN     | NaN     | NaN     | NaN     | NaN     | NaN     | 20.649  | NaN     | NaN     | P17050 P17050 Alpha-N-acetylal NAGA                              |
|     | 26.6122 | 26.3705 | 26.1176 | 25.9325 | 26.103  | 25.9534 | 26.2742 | 26.1384 | 25.9901 | 26.2932 | 26.1904 | 26.4361 | Q9UJ70;Q9UJ70-2 Q9UJ70;Q9UJ70-2 N-acetyl-D-glucos NAGK           |
|     | 30.6504 | 30.3398 | 29.8355 | 29.7128 | 29.8937 | 29.6668 | 30.2181 | 29.5434 | 29.7301 | 30.5086 | 29.9362 | 29.9286 | P43490;A0A0C4D P43490;A0A0C4D Nicotinamide pho NAMPT             |
|     | 29.4004 | 30.1174 | 29.3508 | 28.906  | 29.9106 | 29.3415 | 29.4784 | 29.2279 | 29.4905 | 30.1886 | 30.1982 | 29.5633 | Q9NR45;Q5TBRO; Q9NR45 Sialic acid synthas NANS                   |
|     | 30.9507 | 30.2923 | 30.7866 | 30.9227 | 30.1221 | 30.786  | 30.64   | 30.8252 | 29.8981 | 30.6281 | 30.4889 | 30.481  | P55209;F5H4R6; P55209;F5H4R6;P Nucleosome assei NAP11            |
|     | 24.9377 | 23.1476 | 24.5793 | 25.1808 | 23.9154 | 24.9458 | 24.2951 | NaN     | NaN     | 23.8698 | 24.2615 | 23.748  | F8VV59;B7Z9C2;P F8VV59;B7Z9C2;P Nucleosome assei NAP11           |
|     | 27.3561 | 26.8925 | 27.2571 | 26.921  | 26.6432 | 26.6591 | 27.0372 | 27.436  | 26.2662 | 26.3104 | 26.4617 | 27.1683 | Q99733;Q99733-; Q99733;Q99733-2 Nucleosome assei NAP114          |
|     | 27.1766 | 27.3493 | 27.2351 | 26.9607 | 26.7743 | 27.0891 | 27.682  | 26.734  | 27.2667 | 27.5026 | 26.9106 | 27.2743 | P54920;M0R0Y2; P54920;M0R0Y2; P Alpha-soluble NSF NAPA           |
| NaN | NaN     | NaN     | 21.0079 | NaN     | NaN     | NaN     | NaN     | NaN     | NaN     | 22.2492 | NaN     | NaN     | Q9H115;A0A087V Q9H115;A0A087V Beta-soluble NSF : NAPB            |
|     | 27.1003 | 27.7273 | 27.2975 | 26.7832 | 27.6095 | 27.2678 | 27.4481 | 27.4535 | 27.6117 | 27.2546 | 27.226  | 27.7143 | Q99747;Q99747-; Q99747;Q99747-2 Gamma-soluble N NAPG             |
|     | 22.0702 | NaN     | 22.7479 | 22.1627 | 22.1991 | 22.441  | NaN     | NaN     | NaN     | NaN     | NaN     | NaN     | Q6XQN6;Q6XQN6 Q6XQN6;Q6XQN6 Nicotinate phosph NAPT               |
|     | 26.4559 | 26.295  | 26.2962 | 26.2452 | 26.5172 | 26.3068 | 26.7933 | 26.8081 | 26.5523 | 26.5531 | 26.7281 | 26.9166 | O43776;K7EIU7;O O43776 Asparagine--tRNA NARS                     |
|     | 23.6499 | NaN     | 22.5433 | 23.5379 | NaN     | NaN     | NaN     | NaN     | 23.1252 | 23.216  | 23.2181 | NaN     | Q96I59;E9PRK2;H Q96I59;E9PRK2 Probable asparagi NARS2            |
|     | 26.1952 | 26.2103 | 26.5692 | 26.2989 | 26.3869 | 26.9347 | 25.9199 | 26.2353 | 25.2913 | 26.5181 | 26.7469 | 27.057  | P49321;P49321-3, P49321;P49321-3; Nuclear autoantig NASP         |
| NaN | NaN     | NaN     | NaN     | NaN     | NaN     | NaN     | NaN     | NaN     | NaN     | 22.1561 | 21.624  | NaN     | P18440;F5H5R8 P18440;F5H5R8 Arylamine N-acet NAT1                |
|     | 28.134  | 27.1025 | 27.5204 | 29.3598 | 27.7312 | 27.2767 | 24.0086 | 24.2071 | 24.3022 | 26.2723 | 26.8243 | 25.9298 | Q9H0A0;Q9H0A0 Q9H0A0;Q9H0A0- N-acetyltransfera: NAT10            |
| NaN | NaN     | NaN     | NaN     | NaN     | NaN     | NaN     | 21.4401 | NaN     | NaN     | NaN     | NaN     | NaN     | Q93015;Q93015-; Q93015;Q93015-2 N-acetyltransfera: NAT6          |
|     | 22.559  | NaN     | 22.3981 | 22.7588 | 22.6307 | NaN     | 22.6684 | NaN     | NaN     | 22.4147 | NaN     | NaN     | Q8IVL0;H0YHA8;C Q8IVL0;H0YHA8;C Neuron navigator NAV3            |
| NaN | NaN     | NaN     | NaN     | 21.6514 | NaN     | A2RRP1;A2RRP1-; A2RRP1;A2RRP1-2 Neuroblastoma-ai NBAS            |
|     | 23.544  | NaN     | 22.2081 | 23.2577 | NaN     | NaN     | 22.5177 | NaN     | NaN     | 22.886  | 22.7231 | NaN     | Q6ZNU1;Q6ZNU1-2 Q6ZNU1;Q6ZNU1-2 Neurobeachin-like NBEAL2         |
|     | 28.0844 | 26.1018 | 28.2173 | 26.1236 | 24.9514 | 26.1803 | 27.6234 | 26.6296 | 25.7311 | 25.3381 | 24.396  | 23.6291 | Q14596;Q14596-; Q14596;Q14596-2 Next to BRCA1 ge NBR1            |
|     | 28.6124 | 27.0413 | 27.7623 | 28.3884 | 27.0723 | 27.7518 | 27.0449 | 27.3363 | 26.6085 | 27.6296 | 27.2408 | 26.7693 | Q15021;E7EN77;F Q15021;E7EN77 Condensin compl NCAPD2             |
|     | 26.1449 | NaN     | 26.1568 | 26.3249 | NaN     | NaN     | NaN     | NaN     | NaN     | NaN     | 26.0046 | NaN     | P42695;G3V1A9;E P42695;G3V1A9 Condensin-2 com NCAPD3             |
|     | 26.9436 | 25.3645 | 26.7015 | 27.3148 | 25.7754 | 26.4365 | 25.6023 | 24.7759 | 25.6117 | 26.0828 | 26.0629 | 24.4286 | Q9BXP3;D6RA93; Q9BXP3 Condensin compl NCAPG                      |
|     | 24.9902 | NaN     | 24.0864 | 24.9057 | 23.7708 | 24.275  | NaN     | NaN     | 24.6455 | 23.862  | 23.625  | NaN     | Q86X12;Q86X12-2; Q86X12;Q86X12-2; Condensin-2 com NCAPG2         |
|     | 26.562  | 25.8803 | 25.9389 | 26.328  | 25.6797 | 25.9862 | 25.7262 | 26.5448 | 26.2014 | 25.711  | 25.3107 | 24.8608 | Q15003;E9PHA2; C Q15003;E9PHA2;C Condensin compl NCAPH           |
|     | 23.013  | NaN     | 22.1981 | 23.014  | NaN     | 22.3805 | NaN     | NaN     | NaN     | NaN     | NaN     | NaN     | Q6IBW4;A0A0A6 Q6IBW4;A0A0A6 Condensin-2 com NCAPH2               |
|     | 26.2223 | 24.1182 | 25.0652 | 25.4842 | 24.562  | 24.9555 | 23.8983 | NaN     | NaN     | 25.301  | 25.3696 | 24.961  | Q09161;X6R941;F Q09161 Nuclear cap-bindi NCBP1                   |
|     | 24.171  | 24.2561 | 23.6805 | 23.7986 | 24.3444 | NaN     | NaN     | NaN     | NaN     | 23.8375 | NaN     | NaN     | P52298;P52298-3, P52298;P52298-3; Nuclear cap-bindi NCBP2        |
|     | 23.7942 | 23.3273 | 23.4987 | 23.802  | 23.6786 | NaN     | 23.7665 | NaN     | NaN     | NaN     | NaN     | NaN     | Q9UBB6;Q9UBB6- Q9UBB6;Q9UBB6- Neurochondrin NCDN                 |
|     | 28.4037 | 27.9106 | 28.1274 | 28.6487 | 28.0118 | 28.3821 | 28.0459 | 28.006  | 28.8846 | 28.1421 | 27.7533 | 28.0858 | Q6PIU2;A0A0R4J; Q6PIU2;A0A0R4J2 Neutral cholesterol NCEH1        |
|     | 23.4164 | 23.2296 | 23.2447 | 22.9449 | 23.1897 | 23.1818 | 23.0597 | NaN     | 23.0358 | 22.9157 | 22.9307 | NaN     | P16333;P16333-2, P16333;P16333-2; Cytoplasmic prote NCK1         |
|     | 28.5279 | 28.1985 | 28.8267 | 28.4144 | 28.2957 | 28.8328 | 28.6372 | 28.4512 | 28.5927 | 29.1566 | 29.0408 | 28.7403 | Q9Y2A7;Q9Y2A7-; Q9Y2A7;Q9Y2A7-; Nck-associated pr NCKAP1         |
|     | 23.9434 | 23.7236 | 23.8398 | 24.1999 | 23.618  | 23.7486 | 24.4041 | 24.5195 | 24.0882 | 24.0807 | 25.574  | 24.3417 | Q9NZQ3;Q9NZQ3 Q9NZQ3;Q9NZQ3 NCK-interacting p NCKIPSD            |
|     | 31.9987 | 30.4304 | 30.7306 | 31.7186 | 30.6106 | 30.929  | 29.6745 | 30.3349 | 29.4119 | 30.466  | 30.5131 | 30.7246 | P19338;H7BY16;C P19338;H7BY16 Nucleolin NCL                      |
|     | 24.5722 | 24.6432 | 24.7703 | 25.1191 | 25.0256 | 24.7304 | 24.781  | 25.567  | 26.0476 | 24.8212 | 24.7606 | 24.9202 | Q969V3;Q969V3-; Q969V3;Q969V3-; Nicalin NCLN                     |
| NaN | NaN     | NaN     | NaN     | NaN     | NaN     | NaN     | NaN     | NaN     | NaN     | NaN     | NaN     | 26.8288 | Q15596;E7EWM1 Q15596;E7EWM1 Nuclear receptor : NCOA2             |
|     | 26.5505 | 25.3268 | 25.9315 | 25.0294 | 24.2583 | 25.3364 | 26.2888 | 23.9498 | 24.9727 | 24.9992 | 24.653  | 24.0349 | Q13772;Q13772-; Q13772;Q13772-; Nuclear receptor : NCOA4         |
|     | 23.9193 | 23.6674 | 23.7879 | 23.4328 | 23.6819 | 24.0782 | 24.3874 | NaN     | 22.9729 | 24.2535 | 24.6869 | 24.7232 | Q9HCD5 Q9HCD5 Nuclear receptor : NCOA5                           |
|     | 27.3208 | 27.0175 | 27.5869 | 27.4782 | 26.9903 | 27.6678 | 27.1984 | 26.5173 | 26.7652 | 27.8949 | 27.1133 | 26.9548 | Q92542;Q92542-; Q92542;Q92542-; Nicastrin NCSTN                  |
| NaN | NaN     | NaN     | NaN     | 23.0901 | NaN     | NaN     | NaN     | NaN     | NaN     | 23.3333 | 23.417  | NaN     | Q9BTX1;Q9BTX1- Q9BTX1;Q9BTX1- Nucleoporin NDC1 NDC1              |
|     | 26.3525 | 24.6947 | 25.2243 | 26.1043 | 24.5521 | 25.4734 | 22.6666 | NaN     | NaN     | 25.5949 | 25.181  | 25.3411 | Q14777;J3L4G3;V Q14777 Kinetochore prote NDC80                   |







|     |         |         |         |         |         |         |         |         |         |         |         |         |         |                  |                  |                     |                |
|-----|---------|---------|---------|---------|---------|---------|---------|---------|---------|---------|---------|---------|---------|------------------|------------------|---------------------|----------------|
|     | 24.5734 | 23.8678 | 24.4452 | 25.0914 | 24.3176 | 24.4105 | 22.7761 | 24.175  | NaN     |         | 23.8519 | 24.6405 | 23.8779 | O15226;O15226-7  | O15226;O15226-2  | NF-kappa-B-repre    | NKRF           |
|     | 24.1092 | 24.1784 | 24.1061 | 24.6236 | 24.4891 | 24.1049 | 24.4723 | NaN     | NaN     |         | 24.5958 | 24.7956 | 24.6087 | Q9NVX2;K7EN33;;  | Q9NVX2;K7EN33;;  | Notchless protein   | NLE1           |
|     | 24.2114 | 24.1739 | 23.718  | 23.4253 | 24.0676 | 23.661  | 23.6491 | NaN     |         | 24      | 23.4224 | NaN     | NaN     | Q9BYT8;E9PCB6;;  | Q9BYT8;E9PCB6    | Neurolysin, mitoc   | NLN            |
|     | 22.8347 | NaN     | NaN     | 22.4877 | NaN     | Q9C000;I3L2G5;Q  | Q9C000;I3L2G5;Q  | NACHT, LRR and p    | NLRP1          |
|     | 26.6794 | 25.5221 | 26.5311 | 26.3246 | 25.7196 | 26.4228 | NaN     | NaN     | NaN     | NaN     | NaN     | NaN     | 28.036  | Q9NX02;A0A0G2J   | Q9NX02;A0A0G2J   | NACHT, LRR and p    | NLRP2          |
|     | 25.3974 | NaN     | 24.4677 | 25.474  | 23.7778 | 24.6162 | 24.2574 | NaN     | NaN     | NaN     | 25.1138 | 24.5216 | 25.0015 | Q96D46;C9JA08;C  | Q96D46;C9JA08;C  | 60S ribosomal exp   | NMD3           |
|     | 24.8231 | 24.589  | 24.0582 | 23.7079 | NaN     | 24.2974 | NaN     | NaN     | NaN     | NaN     | 24.6109 | 24.5795 | NaN     | P15531;P15531-2  | P15531;P15531-2  | Nucleoside diphos   | NME1           |
|     | 31.3765 | 31.9618 | 31.5891 | 31.2082 | 31.4239 | 31.5476 | 31.6512 | 31.088  | 30.6888 | 31.7748 | 31.3572 | 31.2878 | 31.2878 | P22392-2;Q32Q1;  | P22392-2;Q32Q1;  | Nucleoside diphos   | NME2;NME1-NME  |
|     | 24.8065 | 24.2336 | 24.2633 | 24.4758 | 23.7852 | 24.1781 | 24.4397 | NaN     | 23.8945 | 24.5479 | 24.482  | NaN     |         | Q9Y5B8;E9PNU1;i  | Q9Y5B8;E9PNU1;i  | Nucleoside diphos   | NME7           |
|     | 24.3993 | 24.0299 | 23.8646 | 23.5881 | 24.0334 | 23.8627 | 23.7844 | NaN     | NaN     | NaN     | 23.2549 | 23.2552 | NaN     | Q13287           | Q13287           | N-myc-interactor    | NMI            |
|     | 24.7945 | 24.8011 | 24.4767 | 25.1437 | 25.0825 | 24.6901 | NaN     | NaN     | NaN     | NaN     | 24.1487 | 23.9837 | NaN     | Q9HAN9;B1AN62    | Q9HAN9;B1AN62    | Nicotinamide/nic    | NMNAT1         |
| NaN | NaN     | NaN     | NaN     | NaN     | NaN     | NaN     | NaN     | NaN     | NaN     | NaN     | 22.6153 | 23.6584 | NaN     | Q9HBL8;I3L3Z0;I3 | Q9HBL8;I3L3Z0;I3 | NmrA-like family c  | NMRAL1         |
|     | 26.8583 | 25.8922 | 26.3432 | 26.1785 | 26.0727 | 25.8806 | 24.8249 | 23.7867 | 25.4497 | 25.757  | 26.1851 | 25.7308 |         | P30419;P30419-2  | P30419;P30419-2  | Glycylpeptide N-t   | NMT1           |
|     | 24.597  | 23.1222 | 23.3836 | 24.1681 | 22.561  | NaN     | NaN     | NaN     | NaN     | NaN     | 23.2532 | 23.1833 | NaN     | O60551;Q5VUC6    | O60551;Q5VUC6    | Glycylpeptide C     | NMT2           |
|     | 24.9732 | 25.0215 | 25.0708 | 25.6031 | 25.383  | 25.1896 | 24.4442 | 25.3558 | 26.2227 | 24.0142 | 24.3885 | 24.6606 |         | Q13423;E9PCX7;C  | Q13423;E9PCX7;C  | NAD(P) transhydr    | NNT            |
|     | 25.6144 | 25.0201 | 24.9682 | 26.1943 | 25.5643 | 25.4411 | 23.3615 | NaN     | NaN     | NaN     | 25.3544 | 25.3813 | NaN     | Q9H6W3;Q9H6W     | Q9H6W3;Q9H6W     | Bifunctional lysine | NO66           |
| NaN | NaN     | NaN     | NaN     | 22.977  | NaN     | NaN     | NaN     | NaN     | NaN     | NaN     | 22.969  | 23.0141 | NaN     | Q9ULX3;H3BUR4    | Q9ULX3;H3BUR4    | RNA-binding prot    | NOB1           |
|     | 25.5629 | 23.8725 | 23.7316 | 25.864  | 24.4203 | 24.5634 | NaN     | NaN     | NaN     | NaN     | 23.6173 | 24.0924 | NaN     | Q9Y3T9           | Q9Y3T9           | Nucleolar comple    | NOC2L          |
|     | 24.6393 | 23.8938 | 24.3662 | 25.0364 | 24.2353 | 24.5778 | NaN     | NaN     | NaN     | NaN     | 24.4843 | 24.4003 | 24.1628 | Q9BV14;F5H303    | Q9BV14           | Nucleolar comple    | NOC4L          |
|     | 26.4947 | 24.9939 | 25.7702 | 24.855  | NaN     | NaN     | 26.4498 | 26.1878 | NaN     | 24.5682 | NaN     | NaN     |         | Q13253           | Q13253           | Noggin              | NOG            |
|     | 24.7342 | NaN     | 23.2952 | 25.0882 | NaN     | NaN     | NaN     | NaN     | NaN     | NaN     | 23.8959 | NaN     | NaN     | Q9BSC4;Q9BSC4-;  | Q9BSC4;Q9BSC4-;  | Nucleolar protein   | NOL10          |
|     | 24.6794 | 23.6556 | 24.2421 | 24.9603 | 23.9536 | 23.8189 | NaN     | NaN     | NaN     | NaN     | 24.1272 | 23.8801 | NaN     | Q9H8H0;Q9H8H0    | Q9H8H0           | Nucleolar protein   | NOL11          |
|     | 23.2027 | 23.304  | 23.2076 | 22.9342 | 22.7114 | 22.9125 | 24.1106 | 23.343  | NaN     | 23.9396 | 23.8168 | 24.6089 |         | O60936;H3BM67;   | O60936;H3BM67;   | Nucleolar protein   | NOL3           |
|     | 25.2043 | 22.9863 | 24.2353 | 25.5357 | 24.2933 | 24.7699 | NaN     | NaN     | NaN     | NaN     | 24.1908 | 24.7304 | NaN     | Q9H6R4;Q9H6R4-   | Q9H6R4;Q9H6R4-   | Nucleolar protein   | NOL6           |
|     | 24.4528 | 23.4193 | 24.6686 | 25.2794 | 24.4221 | 24.7148 | NaN     | NaN     | NaN     | NaN     | 23.984  | 23.7291 | NaN     | Q5SY16           | Q5SY16           | Polynucleotide 5-I  | NOL9           |
|     | 25.2203 | 24.5491 | 24.8319 | 25.6331 | 24.7841 | 24.7767 | 25.6359 | NaN     | NaN     | NaN     | 25.3739 | 25.4811 | 26.091  | Q14978;A0A0A0N   | Q14978;A0A0A0N   | Nucleolar and coil  | NOLC1          |
|     | 23.9239 | 23.0837 | 23.7536 | 24.3795 | 23.6594 | 23.9809 | NaN     | NaN     | NaN     | NaN     |         | 23.9104 | NaN     | Q5C9Z4           | Q5C9Z4           | Nucleolar MIF4G c   | NOM1           |
| NaN | NaN     | NaN     | NaN     | NaN     | NaN     | NaN     | NaN     | NaN     | NaN     | NaN     | NaN     | NaN     | 22.4694 | Q15155;A0A0G2J   | Q15155;A0A0G2J   | Nodal modulator     | NOMO1          |
|     | 25.7954 | 26.0295 | 26.0074 | 25.75   | 26.082  | 26.0192 | 25.8065 | 26.5841 | 26.5754 | 25.934  | 25.9444 | 25.9193 | 25.9193 | Q5JPE7;P69849;J  | Q5JPE7;P69849;J  | Nodal modulator     | NOMO2;NOMO3    |
|     | 30.0148 | 29.8894 | 29.9894 | 30.1972 | 30.3342 | 30.2255 | 28.3594 | 29.6373 | 29.4462 | 30.0691 | 30.4737 | 30.27   | 30.27   | Q15233;Q15233-;  | Q15233;Q15233-2  | Non-POU domain      | NONO           |
|     | 26.7313 | 27.2401 | 27.0926 | 27.7369 | 28.1209 | 26.96   | 25.3031 | 26.6849 | NaN     | 26.3489 | 27.3128 | 26.6889 |         | Q9NPE3;H0YM60    | Q9NPE3           | H/ACA ribonucleo    | NOP10          |
|     | 24.178  | 22.164  | 22.9339 | 24.1613 | 22.0385 | 22.6411 | NaN     | NaN     | NaN     | 22.4065 | 22.3662 | NaN     |         | P78316;E9PFK5;P  | P78316;E9PFK5;P  | Nucleolar protein   | NOP14          |
|     | 23.42   | 22.9877 | 22.7296 | 23.7972 | 23.3782 | 23.1028 | NaN     | NaN     | NaN     | NaN     | 22.8174 | NaN     |         | Q9Y3C1;Q9Y3C1-;  | Q9Y3C1;Q9Y3C1-;  | Nucleolar protein   | NOP16          |
|     | 27.9847 | 27.0648 | 27.3703 | 28.6869 | 28.1861 | 27.5943 | 25.8706 | 24.2817 | 25.2843 | 27.4346 | 27.7929 | 26.8345 |         | P46087;A0A087W   | P46087;A0A087W   | Probable 28S rRN    | NOP2           |
|     | 29.148  | 28.0669 | 28.8577 | 30.028  | 29.0749 | 29.087  | 27.1421 | 24.285  | 26.4516 | 28.3228 | 29.0159 | 28.1517 |         | O00567;H0YDU4;i  | O00567           | Nucleolar protein   | NOP56          |
|     | 28.2194 | 27.0593 | 27.9414 | 29.1472 | 28.2675 | 27.8773 | 25.7047 | NaN     | 23.7265 | 27.7581 | 27.9778 | 26.8735 |         | Q9Y2X3;H7BZ72;F  | Q9Y2X3           | Nucleolar protein   | NOP58          |
| NaN | NaN     | NaN     | NaN     | 19.9285 | NaN     | Q86U38           | Q86U38           | Nucleolar protein   | NOP9           |
|     | 24.788  | 24.1975 | 25.8993 | 25.3841 | 25.0441 | 25.8516 | 24.5881 | NaN     | NaN     | 26.4617 | 25.9252 | 25.702  | 25.702  | O75052;O75052-;  | O75052;O75052-3  | Carboxyl-terminal   | NOS1AP         |
|     | 25.5956 | 25.4954 | 24.9547 | 25.1794 | 24.6571 | 24.9983 | NaN     | 24.8359 | 24.3759 | NaN     | NaN     | NaN     |         | Q9Y314;A0A075B   | Q9Y314;A0A075B   | Nitric oxide synth  | NOSIP          |
|     | 23.1422 | 23.3123 | 23.6341 | 23.1755 | 23.7151 | 23.5185 | NaN     | 23.8848 | 25.093  | 24.4681 | 23.3547 |         | 23.3547 | P46531;M0QX38    | P46531           | Neurogenic locus    | NOTCH1         |
|     | 26.3342 | 26.7141 | 26.9304 | 26.4139 | 26.6942 | 27.1498 | 26.8498 | 26.0997 | 26.4459 | 27.2215 | 26.646  | 26.7747 | 26.7747 | Q04721           | Q04721           | Neurogenic locus    | NOTCH2         |
|     | 27.6237 | 27.9087 | 27.8941 | 27.6788 | 27.3323 | 27.9246 | 27.7362 | 27.5323 | 28.8588 | 27.5136 | 27.3406 | 28.2114 |         | O15118;K7EQ23;C  | O15118;K7EQ23;C  | Niemann-Pick C1     | NP1C1          |
|     | 23.5154 | 23.4732 | 22.7815 | 23.2698 | NaN     | NaN     | 26.8042 | 23.8464 | NaN     | NaN     | NaN     | NaN     |         | P61916;J3KMY5;H  | P61916;J3KMY5;H  | Epididymal secret   | NP2C           |
|     | 28.2869 | 29.0089 | 28.8517 | 28.1315 | 28.8976 | 28.8805 | 28.4862 | 28.3852 | 28.6292 | 28.4201 | 28.575  | 28.7837 |         | P55786;E9PLK3;P  | P55786;E9PLK3;P  | Puromycin-sensiti   | NPEPPS         |
|     | 26.714  | 26.2181 | 26.2867 | 26.213  | 26.1326 | 26.3491 | 26.2252 | NaN     | 26.5564 | 26.1131 | 26.0939 | 26.4666 |         | Q8TAT6;Q8TAT6-   | Q8TAT6;Q8TAT6-   | Nuclear protein lo  | NPLOC4         |
|     | 32.6496 | 32.3174 | 32.7546 | 33.0762 | 32.8679 | 32.9403 | 31.727  | 32.5402 | 31.4637 | 32.3342 | 32.9029 | 32.6318 |         | P06748;P06748-2  | P06748;P06748-2  | Nucleophosmin       | NPM1           |
| NaN | NaN     | 25.2182 | NaN     | NaN     | 26.8163 | NaN     | NaN     | 25.9845 | NaN     | NaN     | NaN     | NaN     | NaN     | P06748-3;E5RI98; | P06748-3         | Nucleophosmin       | NPM1           |
|     | 27.098  | 25.8743 | 26.976  | 27.4917 | 27.1475 | 26.4349 | 25.0119 | NaN     | 25.8666 | 25.7423 | 26.3797 | 26.8959 |         | O75607           | O75607           | Nucleoplasmin-3     | NPM3           |
|     | 28.3271 | 28.4971 | 28.469  | 28.3543 | 28.5944 | 28.3138 | 28.867  | 27.501  | 28.3624 | 28.9668 | 28.1968 | 28.3377 |         | Q9Y639;Q9Y639-1  | Q9Y639;Q9Y639-1  | Neuroplastin        | NPTN;DKFZp566H |
|     | 25.4419 | 27.0832 | 25.2647 | 24.3842 | 26.2688 | 25.4507 | 25.9392 | 25.2909 | 25.6902 | 24.8943 | 25.3643 | 25.2635 |         | P16083;Q5TD07;C  | P16083;Q5TD07;C  | Ribosylidihydronic  | NQO2           |
|     | 23.9876 | 23.3465 | 23.19   | 23.873  | 23.2521 | 23.2244 | 23.3291 | NaN     | NaN     | 22.9951 | 23.2443 | NaN     |         | Q86WQ0;Q86WQ     | Q86WQ0;Q86WQ     | Nuclear receptor    | NR2C2AP        |
|     | 23.337  | NaN     | 22.9977 | 22.9674 | 22.5466 | 22.9211 | NaN     | NaN     | NaN     | NaN     | NaN     | NaN     |         | P04150;P04150-9  | P04150;P04150-9  | Glucocorticoid rec  | NR3C1          |
|     | 28.1547 | 28.6106 | 29.0163 | 28.2545 | 28.7245 | 29.1085 | 28.955  | 28.6238 | 28.9771 | 29.0811 | 28.9418 | 29.2138 |         | P01111           | P01111           | GTPase NRas         | NRAS           |
|     | 22.5943 | NaN     |         | Q96F24;A0A087V   | Q96F24;A0A087V   | Nuclear receptor-   | NRBF2          |
|     | 25.6068 | 25.0513 | 25.3745 | 25.2221 | 24.9012 | 24.9843 | 25.6557 | 25.4821 | 24.9969 | 25.3241 | 24.8775 | 25.25   | 25.25   | Q9UHY1;F8W6G1    | Q9UHY1;F8W6G1    | Nuclear receptor-   | NRBP1          |
|     | 24.6215 | 24.5722 | 24.9848 | 24.862  | 24.8553 | 25.0941 | 25.0039 | 25.0944 | 24.578  | 24.7759 | 24.9145 | 24.869  |         | O43847;O43847-2  | O43847;O43847-2  | Nardilysin          | NRD1           |
|     | 28.3371 | 28.3411 | 28.9009 | 28.2858 | 28.1023 | 29.0034 | 29.3923 | 29.059  | 28.9134 | 29.8557 | 29.292  | 29.3533 |         | O14786;E9PEP6;C  | O14786;E9PEP6;C  | Neurophilin-1       | NRP1           |
| NaN | NaN     | NaN     | NaN     | 20.9227 | NaN     |         | Q9GZP1;A0A087V   | Q9GZP1;A0A087V   | Neurensin-2         | NRSN2          |
|     | 23.8548 | NaN     | 23.2137 | 24.1045 | NaN     | NaN     | 22.7621 | NaN     | NaN     | NaN     | 22.9527 | 22.7117 |         | O95478;A0A0A0N   | O95478           | Ribosome biogen     | NSA2           |
|     | 24.5087 | 24.6124 | 24.6676 | 25.1958 | 24.6181 | 24.6168 | 25.2671 | 25.042  | 25.2622 | 24.5176 | 24.3574 | 24.3262 |         | Q15738;C9JDR0    | Q15738;C9JDR0    | Sterol-4-alpha-car  | NSDHL          |



|     |         |         |         |         |         |         |         |         |         |         |         |         |                  |                  |                                  |
|-----|---------|---------|---------|---------|---------|---------|---------|---------|---------|---------|---------|---------|------------------|------------------|----------------------------------|
|     | 28.8192 | 28.2314 | 28.5084 | 28.8986 | 28.5127 | 28.6105 | 27.7914 | 27.9507 | 27.8813 | 27.8724 | 28.0749 | 27.4855 | P46459;J3L0N3;P4 | P46459;J3L0N3;P4 | Vesicle-fusing ATP NSF           |
|     | 26.4461 | 27.1801 | 26.8064 | 26.4507 | 26.9602 | 26.9197 | 27.357  | 27.1414 | 27.1379 | 27.2503 | 27.4315 | 27.4744 | Q9UNZ2;Q9UNZ2    | Q9UNZ2;Q9UNZ2    | NSFL1 cofactor p4 NSFL1C         |
|     | 22.8613 | 22.8656 | 22.328  | NaN     | 22.656  | NaN     | NaN     | NaN     | NaN     | 22.951  | 22.3236 | NaN     | Q92636;Q92636-;  | Q92636;Q92636-2  | Protein FAN NSMAF                |
|     | 22.8221 | 22.1668 | 22.2438 | 22.4684 | 22.3935 | NaN     | NaN     | NaN     | NaN     | 21.836  | 22.3511 | NaN     | Q8WV22;H3BSL0;   | Q8WV22;H3BSL0;   | Non-structural me NSMCE1         |
|     | 28.7505 | 27.4781 | 27.8112 | 28.5723 | 27.8175 | 27.9222 | 26.6306 | 27.4056 | 26.7338 | 28.5085 | 28.1198 | 27.5237 | Q08J23;Q08J23-2; | Q08J23;Q08J23-2; | tRNA (cytosine)34 NSUN2          |
|     | 22.6038 | NaN     | NaN     | 22.4268 | NaN     | Q96P11;Q96P11-;  | Q96P11-;         | Probable 28S rRN NSUN5;NSUN5P2   |
| NaN | NaN     | NaN     | NaN     | NaN     | NaN     | NaN     | NaN     | NaN     | NaN     | NaN     | NaN     | 19.8661 | Q8TEA1;U3KQU2    | Q8TEA1           | Putative methyltr NSUN6          |
|     | 23.2098 | 23.7394 | 24.237  | 23.2911 | 24.326  | NaN     | NaN     | NaN     | NaN     | 23.5768 | 23.8647 | NaN     | Q8TCD5;J3KSY6;J  | Q8TCD5;J3KSY6;J  | 5(3)-deoxyribonuc NT5C           |
|     | 24.3617 | 23.9396 | 24.2137 | 24.0759 | 23.9822 | 24.1252 | 24.7546 | NaN     | 23.5247 | 24.3299 | 23.7063 | 23.461  | P49902;P49902-2; | P49902;P49902-2  | Cytosolic purine 5 NT5C2         |
|     | 22.5726 | 22.7998 | 22.5843 | 22.5679 | 22.8749 | NaN     | NaN     | NaN     | NaN     | 22.3428 | 21.6934 | NaN     | Q9H0P0;Q9H0P0-   | Q9H0P0;Q9H0P0-   | Cytosolic 5-nuclec NT5C3A        |
|     | 23.2525 | 24.3806 | 23.8617 | 23.2593 | 23.7004 | 23.4215 | 22.6794 | NaN     | NaN     | 23.259  | 23.8662 | NaN     | Q5TFE4;Q5TFE4-2  | Q5TFE4;Q5TFE4-2  | 5-nucleotidase do NT5DC1         |
|     | 22.5174 | NaN     | NaN     | 22.1681 | NaN     | Q9H857-2;Q9H85   | Q9H857-2;Q9H85   | 5-nucleotidase do NT5DC2         |
|     | 32.5899 | 32.3847 | 33.1841 | 32.7775 | 32.3787 | 33.0971 | 32.5879 | 31.8288 | 32.5815 | 33.0536 | 32.502  | 32.6784 | P21589;P21589-2; | P21589;P21589-2  | 5-nucleotidase NT5E              |
|     | 25.6403 | 24.8477 | 25.0036 | 25.2912 | 25.2712 | 25.0458 | 24.8056 | 24.9469 | NaN     | 25.8905 | 25.5984 | 24.0398 | Q9BV86;Q9BV86-   | Q9BV86;Q9BV86-   | N-terminal Xaa-Pr NTMT1          |
|     | 24.5798 | 24.4019 | 24.2252 | 24.593  | 24.4987 | 24.4699 | NaN     | NaN     | NaN     | 23.9968 | 24.2458 | 23.9002 | Q9BSD7;Q5TDF0    | Q9BSD7;Q5TDF0    | Cancer-related nu NTPCR          |
|     | 24.1675 | 23.2309 | 23.6754 | 23.9138 | 23.4979 | 23.9522 | NaN     | NaN     | NaN     | 23.1276 | 23.0683 | NaN     | Q9Y5A7;H3BM14;   | Q9Y5A7;H3BM14;   | NEDD8 ultimate b NUB1            |
|     | 24.4717 | 23.5592 | 23.6961 | 24.0364 | NaN     | P53384;P53384-2; | P53384;P53384-2  | Cytosolic Fe-S clus NUBP1        |
|     | 24.1584 | NaN     | 23.6081 | 24.2201 | 23.9903 | 23.4437 | NaN     | NaN     | NaN     | NaN     | NaN     | NaN     | H3BNF0;Q9Y5Y2;†  | H3BNF0;Q9Y5Y2;†  | Cytosolic Fe-S clus NUBP2        |
| NaN | NaN     | NaN     | NaN     | 22.2668 | NaN     | Q8TB37;F8W061;†  | Q8TB37;F8W061;†  | Iron-sulfur protein NUBPL        |
|     | 27.9664 | 29.0086 | 28.4915 | 27.767  | 29.0044 | 28.6956 | 30.4957 | 29.9091 | 29.7292 | 28.5947 | 28.5942 | 28.9836 | Q02818;H7BZ1;C   | Q02818;H7BZ1;C   | Nucleobindin-1 NUCB1             |
|     | 25.1019 | 25.0663 | 25.5284 | 25.4134 | 25.9339 | 25.8521 | NaN     | NaN     | 25.2477 | 25.3513 | 25.9222 | 26.6996 | Q9H1E3;Q9H1E3-   | Q9H1E3;Q9H1E3-   | Nuclear ubiquitout NUCKS1        |
|     | 29.4172 | 29.6445 | 29.4968 | 29.0335 | 29.3916 | 29.2902 | 29.784  | 30.0409 | 29.9787 | 29.5714 | 29.9067 | 30.1419 | Q9Y266;A0A0A0N   | Q9Y266           | Nuclear migration NUDC           |
|     | 28.716  | 28.4324 | 28.3924 | 28.5794 | 28.4858 | 28.3809 | 28.1934 | 28.3682 | 28.0408 | 28.2716 | 28.2826 | 28.2634 | Q96RS6;Q96RS6-   | Q96RS6;Q96RS6-2  | NudC domain-con NUDCD1           |
|     | 25.7013 | 25.9631 | 25.546  | 25.4798 | 25.6251 | 25.7103 | 25.6826 | 26.1653 | 25.2858 | 25.4352 | 25.6759 | 25.8425 | Q8WVJ2;E5RFP0    | Q8WVJ2;E5RFP0    | NudC domain-con NUDCD2           |
| NaN | NaN     | NaN     | NaN     | 23.6591 | NaN     | P36639;P36639-4; | P36639;P36639-4; | 7,8-dihydro-8-oxo NUDT1          |
|     | 22.2568 | NaN     | 22.4831 | NaN     | 22.6066 | NaN     | NaN     | NaN     | NaN     | 22.737  | 23.0839 | NaN     | Q96DE0;Q96DE0-   | Q96DE0;Q96DE0-   | U8 snoRNA-decap NUDT16           |
|     | 23.0358 | NaN     | NaN     | 23.2842 | NaN     | P50583           | P50583           | Bis(5-nucleosyl)-tr NUDT2        |
|     | 25.9869 | 26.4757 | 26.5114 | 26.4817 | 26.989  | 26.6895 | 25.363  | 26.5621 | 26.0414 | 27.059  | 27.5014 | 27.4543 | Q43809;H3BND3;   | Q43809;H3BND3    | Cleavage and poly NUDT21         |
|     | 26.2304 | 24.7539 | 25.0205 | 25.276  | 24.2452 | 24.2327 | 25.2053 | NaN     | NaN     | 24.9165 | 25.0015 | NaN     | Q9NZJ9-2;Q9NZJ9  | Q9NZJ9-2;Q9NZJ9  | Diphosphoinositol NUDT4;NUDT11;N |
|     | 27.0073 | 28.1483 | 27.2501 | 26.6492 | 27.9459 | 27.2208 | 28.0253 | 28.8593 | 28.1805 | 27.5387 | 27.9884 | 28.4138 | Q9UUK9;A6NFX8;   | Q9UUK9;A6NFX8;   | ADP-sugar pyroph NUDT5           |
|     | 22.5468 | 22.749  | 22.6201 | 21.9662 | 23.0123 | 22.7201 | 23.6041 | NaN     | NaN     | 22.7955 | 23.0507 | 23.3488 | Q9BW91;Q9BW9-    | Q9BW91;Q9BW9-    | ADP-ribose pyro NUDT9            |
|     | 24.911  | 24.4046 | 24.7461 | 24.9984 | 24.0918 | 24.6205 | 23.63   | 23.9804 | NaN     | 24.9846 | 24.5644 | NaN     | Q9BZD4;E9PQC4;†  | Q9BZD4;E9PQC4;†  | Kinetochore prote NUF2           |
|     | 24.9955 | 24.7196 | 24.5115 | 24.6545 | 24.2621 | 24.1587 | NaN     | NaN     | NaN     | NaN     | 24.1272 | NaN     | Q7Z417           | Q7Z417           | Nuclear fragile X r NUFIP2       |
| NaN | NaN     | NaN     | NaN     | NaN     | NaN     | NaN     | NaN     | NaN     | NaN     | NaN     | NaN     | 24.9721 | Q7Z417-2         | Q7Z417-2         | Nuclear fragile X r NUFIP2       |
|     | 26.1899 | 26.3743 | 27.1561 | 26.687  | 26.9293 | 26.9362 | 25.9905 | 26.4993 | 23.9556 | 26.8606 | 27.0618 | 27.626  | Q14980;Q14980-;  | Q14980;Q14980-2  | Nuclear mitotic ar NUMA1         |
|     | 26.4254 | 27.2521 | 27.2546 | 27.0717 | 27.3929 | 27.6828 | 27.0157 | 26.5782 | 26.6488 | 27.7359 | 27.4238 | 27.4975 | P49757;P49757-2; | P49757;P49757-2; | Protein numb hon NUMB            |
|     | 25.4212 | 23.9144 | 24.9958 | 25.5062 | 24.7815 | 25.2792 | NaN     | NaN     | 24.5685 | 25.1567 | 25.2594 | 24.8711 | P57740;P57740-2; | P57740;P57740-2; | Nuclear pore com NUP107          |
|     | 24.612  | 23.774  | 24.8803 | 25.6445 | 24.7311 | 25.0261 | 24.3535 | NaN     | 24.3664 | 24.8043 | 25.026  | 24.0744 | Q8WUM0           | Q8WUM0           | Nuclear pore com NUP133          |
|     | 22.9018 | 22.9372 | 22.862  | 22.819  | 23.1364 | NaN     | NaN     | NaN     | NaN     | 22.6682 | 22.888  | NaN     | P49790;P49790-2; | P49790;P49790-2; | Nuclear pore com NUP153          |
|     | 26.4413 | 25.5575 | 26.2558 | 26.3052 | 25.9094 | 26.1509 | 25.7216 | 26.6722 | 26.1963 | 26.2737 | 26.3608 | 26.1785 | O75694;E9PF10;O  | O75694;E9PF10;O  | Nuclear pore com NUP155          |
|     | 24.8847 | 24.1756 | 24.536  | 25.2109 | 24.2865 | 24.7223 | NaN     | NaN     | NaN     | 24.6328 | 24.653  | NaN     | Q12769;G3V198;†  | Q12769;G3V198;†  | E Nuclear pore com NUP160        |
|     | 23.6405 | NaN     | 22.7911 | 23.5676 | 23.124  | 21.8523 | NaN     | NaN     | NaN     | 22.9314 | 23.0383 | 22.1023 | Q5SRES;Q5SRES-2  | Q5SRES;Q5SRES-2  | Nucleoporin NUP1; NUP188         |
|     | 25.8885 | 24.4377 | 25.6946 | 26.6867 | 25.5781 | 25.8149 | 24.4091 | NaN     | 24.7162 | 25.988  | 26.0632 | 25.8398 | Q92621;U3KPK2;   | Q92621           | Nuclear pore com NUP205          |
| NaN | NaN     | NaN     | NaN     | 22.0826 | NaN     | Q8TEM1;Q8TEM1    | Q8TEM1;Q8TEM1    | Nuclear pore men NUP210          |
|     | 23.473  | 23.757  | 23.0326 | 22.3445 | 23.2124 | NaN     | NaN     | NaN     | NaN     | 23.0395 | 23.3597 | NaN     | P35658;P35658-3; | P35658;P35658-3; | Nuclear pore com NUP214          |
|     | 25.7564 | 25.6399 | 25.2213 | 25.5215 | 25.7686 | 25.2258 | 25.0702 | 25.826  | 25.6433 | 25.8649 | 26.2924 | 25.6234 | Q8NFH4;F8VTY2    | Q8NFH4;F8VTY2    | Nucleoporin Nup3; NUP37          |
|     | 24.5052 | 24.3205 | 24.3864 | 24.4903 | 24.3084 | 24.1929 | NaN     | NaN     | 23.9135 | 24.5162 | 24.9886 | 24.2094 | Q8NFH3;Q8NFH3-   | Q8NFH3;Q8NFH3-   | Nucleoporin Nup4 NUP43           |
|     | 24.1124 | 24.671  | 23.869  | 24.0365 | 24.0396 | 24.0715 | NaN     | NaN     | NaN     | NaN     | NaN     | 24.9439 | Q9UKX7;Q9UKX7-   | Q9UKX7;Q9UKX7-   | Nuclear pore com NUP50           |
|     | 23.309  | NaN     | 22.683  | 22.9586 | 23.1013 | NaN     | NaN     | NaN     | NaN     | NaN     | NaN     | 23.8219 | Q7Z3B4;Q7Z3B4-;  | Q7Z3B4;Q7Z3B4-;  | Nucleoporin p54 NUP54            |
|     | 23.9622 | 24.6858 | 24.0921 | 24.3629 | 24.7773 | 24.0846 | 23.9736 | NaN     | NaN     | 24.1725 | NaN     | 24.6603 | P37198;MOQXN5    | P37198;MOQXN5    | Nuclear pore glyci NUP62         |
|     | 26.9824 | 24.9727 | 25.6563 | 26.3655 | 25.3785 | 25.6537 | NaN     | NaN     | NaN     | 26.0203 | 26.0352 | 24.7901 | Q9BW27;Q9BW2-    | Q9BW27;Q9BW2-    | Nuclear pore com NUP85           |
|     | 26.3245 | 25.4837 | 25.8106 | 26.2023 | 25.8425 | 25.8627 | 25.0796 | 25.5096 | 25.3984 | 25.676  | 25.3583 | 25.6426 | Q99567;J3KMX1;†  | Q99567;J3KMX1    | Nuclear pore com NUP88           |
|     | 26.3644 | 25.7884 | 26.2473 | 26.4939 | 26.1085 | 26.4342 | 26.348  | 26.2707 | 26.3568 | 26.7394 | 27.0163 | 26.7863 | Q8N1F7;H3BVG0;   | Q8N1F7;H3BVG0;   | Nuclear pore com NUP93           |
|     | 24.711  | 24.5875 | 24.9732 | 25.1024 | 25.1273 | 25.0186 | 24.6206 | NaN     | NaN     | 24.5747 | 25.0915 | 24.6968 | P52948;P52948-5; | P52948;P52948-5; | Nuclear pore com NUP98           |
|     | 26.0541 | NaN     | 25.9237 | 25.7082 | NaN     | NaN     | NaN     | NaN     | NaN     | NaN     | 26.4166 | 26.1134 | Q9BVL2;Q5JRG1;†  | Q9BVL2;Q5JRG1;†  | Nucleoporin p58;† NUP11          |
|     | 27.3842 | 27.9377 | 27.2539 | 26.7558 | 27.6246 | 27.5107 | 28.1829 | 27.8621 | 28.3179 | 27.9576 | 28.1647 | 27.9055 | P61970;H3BRV9    | P61970;H3BRV9    | Nuclear transport NUTF2          |
|     | 21.3706 | NaN     | O15381;O15381-;  | O15381;O15381-3  | Nuclear valosin-cc NVL           |
|     | 25.7988 | 25.0923 | 25.528  | 26.1034 | 25.1162 | 25.4358 | 24.0526 | NaN     | 24.0458 | 25.9506 | 25.6558 | 25.4538 | Q9UBU9;E9PIN3;†  | Q9UBU9;E9PIN3;†  | Nuclear RNA expo NXF1            |
|     | 24.8888 | 24.8942 | 24.4727 | 24.7349 | 24.5716 | 24.7713 | 24.9464 | 24.9205 | 24.8005 | 24.5157 | 25.1717 | 25.2111 | Q6DKJ4;Q6DKJ4-2  | Q6DKJ4;Q6DKJ4-2  | Nucleoredoxin NXN                |
|     | 22.2203 | NaN     | NaN     | 22.7071 | NaN     | Q9UKK6           | Q9UKK6           | NTF2-related expr NTF1           |



|     |         |         |         |         |         |         |         |         |         |         |         |         |                 |                 |                     |               |
|-----|---------|---------|---------|---------|---------|---------|---------|---------|---------|---------|---------|---------|-----------------|-----------------|---------------------|---------------|
| NaN | NaN     | NaN     | NaN     | NaN     | NaN     | 24.9238 | NaN     | NaN     | NaN     | NaN     | NaN     | NaN     | E9PJ29;Q86UD1   | E9PJ29;Q86UD1   | Out at first protei | OAF           |
|     | 25.328  | 25.9176 | 25.5788 | 25.4052 | 25.9113 | 25.7186 | 25.7117 | 25.443  | 25.3071 | 25.7338 | 26.3858 | 25.762  | Q9Y530;C9JNE2;C | Q9Y530;C9JNE2;C | O-acetyl-ADP-ribo   | OARD1         |
|     | 25.0903 | 23.5211 | 23.6994 | 24.7261 | 23.8367 | 23.7559 | NaN     | NaN     | NaN     | NaN     | 23.22   | NaN     | Q9Y6K5;F8VWK9;  | Q9Y6K5          | 2-5-oligoadenylat   | OAS3          |
|     | 23.6859 | NaN     | 22.7848 | 23.3842 | 23.4504 | 23.0413 | NaN     | NaN     | NaN     | 22.6277 | NaN     | NaN     | Q15646;Q15646-1 | Q15646;Q15646-1 | 2-5-oligoadenylat   | OASL          |
|     | 29.2229 | 28.9885 | 28.8561 | 29.3349 | 29.0249 | 28.8197 | 27.6224 | 28.1386 | 28.816  | 29.4013 | 29.7198 | 28.1256 | P04181;P04181-2 | P04181;P04181-2 | Ornithine aminot    | OAT           |
|     | 26.8243 | 26.3333 | 27.1332 | 26.7027 | 26.678  | 26.9022 | 25.359  | NaN     | NaN     | 27.7914 | 26.5475 | NaN     | Q8TAD7;F8VQD4   | Q8TAD7;F8VQD4   | Overexpressed in    | OCC1;C12orf75 |
|     | 21.2106 | 21.2202 | 21.778  | 22.1612 | 21.8537 | NaN     | NaN     | NaN     | NaN     | 20.9769 | NaN     | 20.4153 | Q56VL3          | Q56VL3          | OCIA domain-con     | OCLAD2        |
|     | 25.4981 | 25.9254 | 26.0272 | 25.6549 | 25.7952 | 26.2064 | 24.7087 | 24.625  | 24.9454 | 25.2069 | 24.8212 | 24.9952 | Q16625;Q16625-1 | Q16625;Q16625-1 | Occludin            | OCLN          |
|     | 24.9946 | NaN     | 24.5949 | 25.1723 | 24.6309 | NaN     | 24.9328 | NaN     | 24.6427 | 24.9666 | 24.9352 | NaN     | Q01968;Q01968-1 | Q01968;Q01968-1 | Inositol polyphosph | OCRL          |
|     | 23.1211 | NaN     | NaN     | NaN     | NaN     | NaN     | 23.1277 | NaN     | NaN     | NaN     | NaN     | NaN     | Q55WX8;Q55WX8-1 | Q55WX8;Q55WX8-1 | Protein odr-4 hom   | ODR4          |
|     | 26.7068 | 26.7401 | 26.7388 | 27.3106 | 27.4252 | 26.6902 | 24.5671 | 26.9738 | 27.657  | 25.239  | 26.0841 | 26.5979 | Q02218;A0A0D95  | Q02218;A0A0D95  | 2-oxoglutarate de   | OGDH          |
|     | 22.0443 | NaN     | 21.94   | 21.8456 | NaN     | NaN     | NaN     | 23.308  | 22.6388 | 22.3352 | 22.5336 | 22.8961 | Q8N543;H3BUA6;  | Q8N543;H3BUA6;  | Prolyl 3-hydroxyla  | OGFOD1        |
|     | 26.843  | 25.5849 | 26.3189 | 26.5501 | 25.9061 | 26.2362 | 25.6424 | 26.1477 | 25.9323 | 26.3795 | 26.3617 | 25.6096 | Q9NZT2;Q9NZT2-1 | Q9NZT2;Q9NZT2-1 | Opioid growth fac   | OGFR          |
| NaN | NaN     | NaN     | 22.3212 | NaN     | Q5TC84          | Q5TC84          | Opioid growth fac   | OGFRL1        |
|     | 25.3528 | 24.4458 | 24.5029 | 25.5974 | 25.1333 | 24.7364 | 24.3111 | 23.7048 | 24.5477 | 25.0918 | 25.4431 | 24.7762 | O15294;O15294-1 | O15294;O15294-1 | UDP-N-acetylgluc    | OGT           |
| NaN | NaN     | NaN     | NaN     | NaN     | NaN     | NaN     | NaN     | NaN     | NaN     | NaN     | 21.0061 | NaN     | Q43482          | Q43482          | Protein Mis18-bet   | OIP5          |
|     | 28.7993 | 28.8831 | 28.7836 | 28.4161 | 28.7395 | 28.6919 | 28.689  | 28.263  | 28.3461 | 29.0063 | 28.7301 | 28.7406 | Q9NTK5;J3KQ32;C | Q9NTK5;J3KQ32;C | Obg-like ATPase 1   | OLA1          |
| NaN | NaN     | NaN     | NaN     | NaN     | NaN     | NaN     | NaN     | 26.6099 | 28.4166 | NaN     | 25.1308 | 28.1222 | H7BZX2;Q96E52-2 | H7BZX2;Q96E52-2 |                     | OMA1          |
|     | 26.6882 | 27.1599 | 26.4569 | 26.6223 | 26.9878 | 26.3922 | 26.3024 | 26.1591 | 26.3255 | 25.8414 | 25.9117 | 26.1572 | O60313;O60313-2 | O60313;O60313-2 | Dynamin-like 120    | OPA1          |
|     | 22.3458 | 22.327  | 22.7361 | 22.4902 | 22.5711 | 23.0208 | NaN     | 23.6105 | 22.8644 | 22.5596 | 23.4803 | NaN     | O14841          | O14841          | 5-oxoprolinase      | OPLAH         |
|     | 25.5502 | 25.5687 | 26.3183 | 24.9811 | 24.3726 | 25.0848 | 25.7974 | 24.415  | 24.966  | 24.3638 | 23.775  | NaN     | Q96CV9;Q96CV9-  | Q96CV9;Q96CV9-  | Optineurin          | OPTN          |
|     | 24.8201 | 24.9623 | 25.4019 | 24.7077 | 25.2203 | 26.3182 | 25.4356 | NaN     | 26.2022 | 25.079  | 25.3529 | 25.4403 | A0A0B4J2E8;Q96f | A0A0B4J2E8;Q96f | Calcium release-a   | ORAI1         |
|     | 25.2652 | NaN     | 23.7812 | 24.9675 | 24.211  | 24.0354 | NaN     | NaN     | NaN     | 24.0858 | NaN     | NaN     | Q9UBD5;Q9UBD5   | Q9UBD5;Q9UBD5   | Origin recognition  | ORC3          |
|     | 22.0179 | NaN     | NaN     | 22.6215 | NaN     | NaN     | NaN     | NaN     | NaN     | 21.6424 | 22.0927 | 21.9326 | O43929;O43929-2 | O43929;O43929-2 | Origin recognition  | ORC4          |
|     | 23.1767 | NaN     | NaN     | 23.273  | 22.3314 | NaN     | NaN     | NaN     | NaN     | 21.8515 | NaN     | NaN     | O43913;O43913-2 | O43913;O43913-2 | Origin recognition  | ORC5          |
| NaN | NaN     | NaN     | NaN     | NaN     | NaN     | NaN     | NaN     | NaN     | NaN     | NaN     | 21.5897 | NaN     | Q9Y5N6;H3BT22   | Q9Y5N6;H3BT22   | Origin recognition  | ORC6          |
|     | 23.2212 | 22.9217 | 23.2778 | NaN     | 22.9138 | NaN     | Q9P0S3;Q53FV1;f | Q9P0S3;Q53FV1;f | ORM1-like protei    | ORMDL1;ORMDL2 |
| NaN | NaN     | NaN     | 22.5199 | NaN     | Q8N138;Q8N138-  | Q8N138;Q8N138-  | ORM1-like protei    | ORMDL3        |
|     | 23.6277 | 23.9762 | 23.1408 | 23.2013 | NaN     | 22.8635 | 24.9605 | NaN     | NaN     | NaN     | NaN     | NaN     | Q13438;B4E321;C | Q13438;B4E321;C | Protein OS-9        | OS9           |
|     | 27.167  | 26.7526 | 26.8738 | 26.187  | 26.1613 | 26.2651 | 26.0671 | 25.7411 | 25.1145 | 26.1313 | 26.6017 | 26.3194 | P22059;H0YCV6;C | P22059          | Oxysterol-binding   | OSBP          |
|     | 24.9901 | 24.0908 | 24.5173 | 24.8364 | 24.2584 | 24.5635 | 24.8588 | 24.7509 | NaN     | 24.9849 | 25.0051 | 24.8398 | Q9BXB5;Q9BXB5-  | Q9BXB5;Q9BXB5-  | Oxysterol-binding   | OSBPL10       |
|     | 22.5319 | NaN     | 22.9916 | 22.6554 | NaN     | Q9BXB4          | Q9BXB4          | Oxysterol-binding   | OSBPL11       |
|     | 27.8361 | 26.5988 | 26.95   | 27.7551 | 26.4887 | 26.9072 | 26.5761 | 26.1943 | 25.5864 | 26.6144 | 26.5948 | 25.4545 | Q9H4L5;Q9H4L5-1 | Q9H4L5;Q9H4L5-1 | Oxysterol-binding   | OSBPL3        |
|     | 24.7189 | 24.0992 | 24.3241 | 24.4377 | 23.6452 | 23.9021 | 24.3306 | 24.1602 | NaN     | 24.0671 | 23.7547 | NaN     | Q9BZF1;Q9BZF1-3 | Q9BZF1;Q9BZF1-3 | Oxysterol-binding   | OSBPL8        |
|     | 24.6259 | 24.1988 | 24.5662 | 24.4396 | 24.2802 | 24.4403 | 24.5963 | NaN     | 23.9475 | 24.9341 | 24.7217 | NaN     | Q96SU4;Q96SU4-  | Q96SU4;Q96SU4-  | Oxysterol-binding   | OSBP19        |
|     | 26.4879 | 26.0446 | 26.1595 | 26.3336 | 26.3056 | 26.3951 | 25.3624 | 25.8884 | 25.5188 | 26.5199 | 26.6922 | 26.322  | Q9NPF4;G3V445;f | Q9NPF4          | Probable tRNA N6    | OSGEP         |
|     | 22.6626 | 23.2957 | 23.4668 | 22.7978 | 23.4257 | NaN     | 24.6474 | NaN     | NaN     | 23.1465 | 22.964  | NaN     | Q99650;Q99650-1 | Q99650          | Oncostatin-M-spe    | OSMR          |
| NaN | NaN     | NaN     | 22.4932 | NaN     | Q9NRP0;A0A087v  | Q9NRP0;A0A087v  | Oligosaccharyltras  | OSTC          |
|     | 25.6721 | 25.8134 | 26.0954 | 25.3156 | 25.5034 | 25.9566 | 25.9503 | NaN     | 25.767  | 26.0887 | 25.8015 | 26.4019 | Q92882          | Q92882          | Osteoclast-stimul   | OSTF1         |
|     | 26.2136 | 26.7533 | 26.691  | 26.1888 | 26.6242 | 26.6701 | 26.8557 | 27.103  | 27.5407 | 26.6451 | 27.1777 | 27.5095 | Q96FW1;J3KR44;f | Q96FW1;J3KR44;f | Ubiquitin thioeste  | OTUB1         |
|     | 23.2802 | NaN     | 23.0692 | 23.1808 | 23.2277 | NaN     | NaN     | NaN     | NaN     | 22.9698 | 22.9322 | NaN     | Q01804;Q01804-1 | Q01804;Q01804-1 | OTU domain-cont     | OTUD4         |
| NaN | NaN     | NaN     | NaN     | 23.898  | NaN     | Q8N6M0;A0A087   | Q8N6M0;A0A087   | OTU domain-cont     | OTUD6B        |
| NaN | NaN     | 23.0556 | NaN     | 23.2193 | NaN     | NaN     | NaN     | NaN     | NaN     | 23.6123 | NaN     | NaN     | Q6GQQ9;Q6GQQ    | Q6GQQ9;Q6GQQ    | OTU domain-cont     | OTUD7B        |
|     | 24.2208 | 23.9391 | 23.8901 | 23.848  | 23.8133 | NaN     | 24.1738 | NaN     | NaN     | 24.1987 | 23.9977 | NaN     | Q96BN8;H0Y854;f | Q96BN8          | Ubiquitin thioeste  | OTULIN        |
| NaN | NaN     | NaN     | NaN     | NaN     | NaN     | NaN     | NaN     | 18.7635 | NaN     | NaN     | NaN     | NaN     | Q8WZ82          | Q8WZ82          | Ovarian cancer-as   | OVCA2         |
|     | 24.7276 | 25.0668 | 24.4056 | 24.4854 | 25.0411 | 23.929  | NaN     | NaN     | NaN     | 24.3579 | 24.1409 | NaN     | P55809;E9PDW2;f | P55809;E9PDW2   | Succinyl-CoA:3-ke   | OXC11         |
|     | 23.0951 | NaN     | Q8N573-5;Q8N57  | Q8N573-5;Q8N57  | Oxidation resistan  | OXR1          |
|     | 28.996  | 27.2238 | 27.6238 | 28.5356 | 27.6188 | 27.707  | 27.9284 | 27.6318 | 27.5489 | 28.3143 | 28.0511 | 27.8457 | O95747;C9JIG9   | O95747;C9JIG9   | Serine/threonine-   | OXSR1         |
|     | 23.6693 | NaN     | 23.2981 | 23.1172 | 23.1063 | 23.2648 | NaN     | NaN     | NaN     | NaN     | NaN     | NaN     | Q99571;F6SFZ6;Q | Q99571;F6SFZ6;Q | P2X purinoceptor    | P2RX4         |
|     | 27.0711 | 27.7572 | 27.2764 | 27.0595 | 27.4751 | 27.0395 | 27.0755 | 28.3631 | 28.2178 | 26.8868 | 26.8032 | 27.1869 | P13674          | P13674          | Prolyl 4-hydroxyla  | P4HA1         |
| NaN | 25.1638 | 25.2053 | 24.8781 | 25.1634 | 25.0883 | 25.3215 | NaN     | NaN     | NaN     | NaN     | NaN     | NaN     | P13674-2;P13674 | P13674-2;P13674 | Prolyl 4-hydroxyla  | P4HA1         |
|     | 24.3335 | 24.8984 | 24.4912 | 24.1324 | 24.749  | 24.6865 | NaN     | 25.5011 | 25.7282 | 23.6606 | 23.5945 | 24.2907 | O15460;O15460-2 | O15460;O15460-2 | Prolyl 4-hydroxyla  | P4HA2         |
|     | 30.3382 | 29.9303 | 29.9136 | 30.028  | 29.6022 | 29.9386 | 30.058  | 30.4031 | 30.2763 | 29.955  | 29.439  | 29.5335 | P07237;H7BZ94;H | P07237;H7BZ94   | Protein disulfide-i | P4HB          |
|     | 29.194  | 29.2672 | 28.7438 | 28.959  | 29.1891 | 28.6781 | 29.0061 | 29.1437 | 29.009  | 28.6824 | 29.1161 | 29.025  | Q9UQ80;Q9UQ80   | Q9UQ80;Q9UQ80   | Proliferation-asso  | PA2G4         |
|     | 24.8142 | 24.4223 | 24.3679 | 24.4483 | 24.5301 | 24.2289 | 23.0138 | NaN     | NaN     | 23.7837 | 23.9323 | 23.6346 | Q9BRP4;F5H0C4;f | Q9BRP4;F5H0C4;f | Proteasomal ATP:    | PAAF1         |
|     | 31.6478 | 30.9265 | 30.9652 | 31.3761 | 30.7553 | 31.0515 | 30.396  | 30.4752 | 29.8167 | 30.5969 | 30.549  | 30.3291 | P11940;E7EQV3;f | P11940;E7EQV3;f | Polyadenylate-bin   | PABPC1        |
|     | 28.7529 | 28.0364 | 27.9897 | 28.7572 | 28.3117 | 28.0053 | 26.7706 | 26.7307 | 26.7723 | 27.3008 | 27.5481 | 27.0413 | Q13310;Q13310-1 | Q13310;Q13310-1 | Polyadenylate-bin   | PABPC4        |
|     | 22.1974 | NaN     | 23.8215 | 23.7636 | 23.5465 | NaN     | NaN     | 24.5127 | NaN     | 23.1325 | 22.7615 | 24.6715 | Q86U42;Q86U42-  | Q86U42;Q86U42-  | Polyadenylate-bin   | PABPN1        |
|     | 23.7669 | 23.1803 | 23.5863 | 23.9469 | 23.0799 | 23.4704 | NaN     | NaN     | NaN     | NaN     | 23.1943 | NaN     | Q6VY07;Q6VY07-  | Q6VY07;Q6VY07-  | Phosphofurin acid   | PACS1         |
|     | 26.6861 | 27.5614 | 27.7627 | 26.7884 | 27.483  | 27.9415 | 27.5    | 27.5224 | 27.5474 | 27.8276 | 27.8987 | 28.0073 | Q9UNF0;Q9UNF0   | Q9UNF0;Q9UNF0   | Protein kinase C    | PACIN2        |



|     |         |         |         |         |         |         |         |         |         |         |         |         |                                                                |
|-----|---------|---------|---------|---------|---------|---------|---------|---------|---------|---------|---------|---------|----------------------------------------------------------------|
|     | 25.7489 | 26.9988 | 26.9898 | 26.2278 | 26.3714 | 26.8942 | 26.4096 | 26.1391 | 26.3655 | 27.2887 | 26.9461 | 26.2351 | Q9UKS6;A0A0C4C1;Q9UKS6;A0A0C4D0 Protein kinase C a PACSIN3     |
| NaN | NaN     | NaN     | NaN     | NaN     | NaN     | NaN     | 23.1951 | NaN     | NaN     | NaN     | NaN     | NaN     | P09466;H0Y6A4;H P09466;H0Y6A4;H Glycodelin PAEP                |
|     | 23.7097 | NaN     | 23.2497 | 23.6246 | 23.2093 | NaN     | NaN     | NaN     | 23.4064 | 23.4674 | 23.9364 | 23.6138 | Q8N7H5;Q8N7H5 Q8N7H5;Q8N7H5 RNA polymerase I PAF1              |
|     | 28.3701 | 28.5582 | 28.1562 | 28.097  | 28.3612 | 28.2628 | 28.83   | 28.5008 | 28.4527 | 28.3548 | 28.2168 | 28.1751 | P43034;J3L495;J3I P43034 Platelet-activating PAFAH1B1          |
|     | 27.7455 | 28.6626 | 28.2091 | 27.8227 | 28.3319 | 28.1671 | 28.3386 | 28.1383 | 28.0447 | 28.2161 | 28.1186 | 28.2496 | P68402;J3KNE3;P P68402;J3KNE3 Platelet-activating PAFAH1B2     |
|     | 27.6348 | 28.2455 | 27.9064 | 27.6051 | 28.1883 | 28.1618 | 28.2933 | 28.1036 | 28.4675 | 28.3499 | 28.458  | 28.6294 | Q15102;M0R389; Q15102;M0R389; Platelet-activating PAFAH1B3     |
|     | 23.7708 | 24.5346 | 25.0968 | 23.9125 | 24.9277 | 25.0609 | 24.3004 | NaN     | NaN     | 25.8102 | 25.1733 | 25.5615 | Q9NWWQ8 Q9NWWQ8 Phosphoprotein a PAG1                          |
|     | 30.5385 | 30.7334 | 30.65   | 30.5085 | 30.635  | 30.4755 | 30.358  | 30.5009 | 30.3783 | 30.2305 | 30.4023 | 30.3428 | P22234;P22234-2 P22234;P22234-2 Multifunctional pr PAICS       |
|     | 24.7511 | 23.6316 | 22.7913 | 24.478  | 23.5551 | 22.7605 | NaN     | NaN     | NaN     | 23.2621 | NaN     | NaN     | Q9H074-3;Q9H07 Q9H074-3;Q9H07 Polyadenylate-bin PAIP1          |
| NaN | NaN     | NaN     | 21.4099 | NaN     | NaN     | NaN     | NaN     | NaN     | NaN     | 22.2976 | NaN     | NaN     | Q13153;E9PM17;I Q13153;E9PM17;I Serine/threonine- PAK1         |
|     | 28.6228 | 29.213  | 29.0797 | 28.7343 | 29.0649 | 29.0799 | 28.2658 | 28.3198 | 28.1273 | 28.4394 | 28.6748 | 28.6151 | Q13177;H7C1X3;F Q13177 Serine/threonine- PAK2                  |
|     | 25.0214 | 25.2868 | 26.311  | 25.6637 | 25.6207 | 26.2159 | 25.5037 | 22.7857 | 25.0823 | 26.7005 | 26.1571 | 25.7236 | O96013;O96013-4 O96013;O96013-4 Serine/threonine- PAK4         |
|     | 26.3048 | 26.2132 | 26.3042 | 25.6258 | 25.8911 | 25.9414 | 26.0354 | 25.1848 | 25.0354 | 26.0325 | 25.604  | 24.2942 | Q8WX93;Q8WX9 Q8WX93;Q8WX93 Palladin PALLD                      |
| NaN | NaN     | NaN     | NaN     | NaN     | NaN     | NaN     | NaN     | NaN     | 23.3928 | NaN     | NaN     | NaN     | H7BYD9;H0Y9I4 H7BYD9 PAM                                       |
|     | 21.9097 | 23.2325 | 23.0093 | 20.5751 | 21.4199 | 22.0142 | 29.7821 | 30.0292 | 27.1624 | 23.0881 | 22.4375 | 22.3397 | P19021;P19021-5 P19021;P19021-5 Peptidyl-glycine a PAM         |
| NaN | NaN     | NaN     | NaN     | NaN     | NaN     | NaN     | NaN     | NaN     | NaN     | NaN     | 23.614  | NaN     | Q504Q3;Q504Q3-Q504Q3;Q504Q3- PAB-dependent p PAN2              |
|     | 22.9892 | NaN     | 23.0761 | 22.6411 | 22.5098 | 22.8444 | NaN     | NaN     | NaN     | NaN     | NaN     | NaN     | Q9BZ23-4;Q9BZ2 Q9BZ23-4;Q9BZ2 Pantothenate kin PANK2           |
|     | 21.3743 | NaN     | 21.1654 | 20.9209 | 20.9213 | NaN     | NaN     | NaN     | NaN     | 21.2315 | 21.2708 | NaN     | Q9H999 Q9H999 Pantothenate kin PANK3                           |
|     | 26.3869 | 25.4456 | 25.4957 | 25.8744 | 25.3632 | 25.3568 | 24.8183 | NaN     | NaN     | 25.2164 | 25.6518 | 23.6505 | Q9NVE7;A0A0G2J Q9NVE7;A0A0G2J Pantothenate kin PANK4           |
|     | 22.9367 | NaN     | 23.0494 | 23.0451 | NaN     | NaN     | NaN     | NaN     | NaN     | 22.7607 | NaN     | NaN     | Q96RD7;Q96RD7- Q96RD7;Q96RD7- Pannexin-1 PANNX1                |
|     | 23.7595 | 23.122  | 23.5725 | 23.6089 | NaN     | 23.5663 | NaN     | NaN     | NaN     | 22.967  | 23.5493 | NaN     | P51003;G3XAH6;P P51003;G3XAH6;P Poly(A) polymeras PAPOLA       |
|     | 26.3498 | 26.1979 | 25.9126 | 25.856  | 26.3308 | 26.1637 | 26.0607 | 26.4462 | 25.9669 | 27.2041 | 26.7042 | 25.6112 | O43252 O43252 Bifunctional 3-phc PAPSS1                        |
|     | 29.1184 | 28.7071 | 28.525  | 28.5648 | 28.815  | 28.4941 | 28.4639 | 28.424  | 28.1919 | 28.9718 | 28.8905 | 28.7032 | O95340;O95340-2 O95340;O95340-2 Bifunctional 3-phc PAPSS2      |
|     | 23.1339 | 23.5173 | 23.2248 | 22.6956 | 23.0912 | 23.3768 | NaN     | NaN     | NaN     | 22.9325 | 23.1293 | 23.2352 | Q8TEW0;Q8TEWC Q8TEW0;Q8TEW0 Partitioning defec PARD3           |
| NaN | NaN     | NaN     | NaN     | NaN     | NaN     | NaN     | NaN     | NaN     | NaN     | 21.1114 | NaN     | NaN     | Q8TEW8;Q8TEW8 Q8TEW8;Q8TEW8 Partitioning defec PARD3B          |
|     | 24.2173 | 24.5387 | 24.8984 | 24.1524 | 24.7626 | 24.7873 | 24.6961 | NaN     | 24.7234 | 24.702  | 24.6786 | NaN     | Q9BYG5;Q9BYG4; Q9BYG5 Partitioning defec PARD6B                |
|     | 22.3623 | NaN     | 22.1777 | 21.8864 | NaN     | Q86W56;Q86W56 Q86W56;Q86W56 Poly(ADP-ribose) I PARG            |
|     | 29.2    | 29.8893 | 29.3266 | 28.6748 | 29.2593 | 29.3278 | 29.4867 | 29.3725 | 29.2558 | 29.4441 | 29.1346 | 29.2897 | Q99497;K7ELW0;I Q99497;K7ELW0;I Protein deglycase PARK7        |
|     | 24.2716 | 24.3951 | 24.6428 | 24.6549 | 24.9905 | 24.6564 | NaN     | NaN     | NaN     | 23.7956 | 24.9646 | NaN     | O95453;O95453-2 O95453;O95453-2 Poly(A)-specific ril PARN      |
|     | 28.3982 | 27.6969 | 27.5605 | 28.3597 | 27.9416 | 27.5632 | 26.8833 | 25.9514 | 26.6531 | 27.2479 | 27.333  | 27.4426 | P09874;Q5VX84;C P09874 Poly [ADP-ribose] PARP1                 |
|     | 24.973  | 24.4794 | 25.0193 | 24.5496 | 24.4138 | 24.4646 | 24.1665 | 24.7686 | 25.4263 | 24.6419 | 23.6973 | 24.5323 | Q9UUK3 Q9UUK3 Poly [ADP-ribose] PARP4                          |
| NaN | NaN     | NaN     | NaN     | 22.1435 | NaN     | Q7L3T8 Q7L3T8 Probable proline- PAR52                          |
|     | 25.2642 | 25.5705 | 26.0537 | 25.1883 | 25.3955 | 25.5949 | 26.2789 | 25.0811 | 25.1752 | 25.8928 | 25.1291 | 25.4487 | Q9NVD7;J3KNQ4; Q9NVD7;J3KNQ4; Alpha-parvin PARVA               |
|     | 23.6609 | NaN     | 23.9034 | 23.4003 | 23.4039 | 23.7411 | NaN     | NaN     | NaN     | NaN     | NaN     | NaN     | Q86TB9;Q86TB9- Q86TB9;Q86TB9- Protein PAT1 hom PATL1           |
|     | 25.7383 | 25.9804 | 25.7417 | 24.9833 | 25.1967 | 25.2169 | 25.3138 | 24.3744 | NaN     | 24.4643 | 23.7197 | NaN     | Q96IZ0;A0A0B4I2 Q96IZ0 PRKC apoptosis W PAWR                   |
|     | 22.609  | NaN     | NaN     | 22.6658 | NaN     | NaN     | NaN     | NaN     | NaN     | NaN     | 22.4964 | NaN     | Q9Y5B6;Q9Y5B6- Q9Y5B6;Q9Y5B6- PAX3- and PAX7-b PAXBP1          |
|     | 25.4584 | 26.0109 | 25.5567 | 25.0895 | 25.772  | 25.5826 | 26.4169 | 26.2819 | 26.0155 | 25.8296 | 26.4854 | 26.4925 | Q9BVG4;A6NDF3 Q9BVG4;A6NDF3 Protein PBDC1 PBDC1                |
|     | 24.9618 | 24.9624 | 25.0757 | 25.1857 | 24.8725 | 25.0453 | 25.2106 | NaN     | 25.0395 | 24.8661 | 24.6045 | 25.2927 | Q96KB5;Q96KB5- Q96KB5;Q96KB5- Lymphokine-activ PBK             |
|     | 22.4388 | NaN     | NaN     | 22.5211 | NaN     | 22.2887 | NaN     | NaN     | NaN     | NaN     | NaN     | NaN     | Q86U86;Q86U86- Q86U86;Q86U86- Protein polybrom PBRM1           |
|     | 27.7013 | 27.103  | 27.0342 | 27.9298 | 27.2096 | 27.0665 | 26.0665 | 27.0576 | 27.7365 | 27.035  | 27.2985 | 26.7739 | P11498;P11498-2 P11498 Pyruvate carboxyl PC                    |
|     | 25.258  | 26.1926 | 25.596  | 25.0358 | 26.0021 | 25.4942 | 25.8575 | 25.6901 | 26.5028 | 26.0401 | 26.2132 | 25.4761 | P61457 P61457 Pterin-4-alpha-car PCBD1                         |
|     | 30.4395 | 29.905  | 30.1637 | 30.3509 | 29.955  | 30.2604 | 29.6374 | 29.6349 | 29.5209 | 30.1819 | 30.2543 | 30.3091 | Q15365 Q15365 Poly(rC)-binding p PCBP1                         |
|     | 29.0289 | 27.8064 | 28.1479 | 28.9031 | 28.123  | 28.1463 | 27.5461 | 26.9859 | 27.631  | 27.8113 | 27.3538 | 26.99   | Q15366-3;Q15366 Q15366-3;Q15366 Poly(rC)-binding p PCBP2       |
| NaN | NaN     | NaN     | NaN     | 22.7075 | NaN     | Q15366-4;Q15366 Q15366-4;Q15366 Poly(rC)-binding p PCBP2       |
| NaN | NaN     | NaN     | NaN     | 22.6327 | NaN     | F8VZX2;H3BRU6;F F8VZX2;H3BRU6;F Poly(rC)-binding p PCBP2;PCBP3 |
| NaN | NaN     | NaN     | NaN     | NaN     | NaN     | NaN     | NaN     | 25.6716 | NaN     | NaN     | NaN     | NaN     | Q9Y5H1;Q9Y5H1- Q9Y5H1;Q9Y5H1- Protocadherin gar PCDHGA2        |
|     | 23.9209 | 23.6032 | 23.5937 | 24.317  | 23.2734 | 23.6234 | 23.6178 | NaN     | NaN     | 24.0097 | NaN     | NaN     | Q5JVF3;Q5JVF3-3 Q5JVF3;Q5JVF3-3 PCI domain-conta PCID2         |
|     | 21.9097 | NaN     | NaN     | 22.4439 | NaN     | Q9H4Z3;A0A087V Q9H4Z3 Phosphorylated C PCIF1                   |
| NaN | NaN     | NaN     | NaN     | NaN     | NaN     | NaN     | NaN     | NaN     | NaN     | NaN     | 20.6079 | NaN     | H0YM31;A0A0A0I H0YM31;A0A0A0I Phosphoenolpyru PCK2             |
|     | 27.1657 | 26.1054 | 25.9998 | 26.4499 | 26.1982 | 25.9763 | 24.5806 | 25.596  | 26.3873 | 26.7432 | 27.3069 | 25.631  | Q16822;B4DW73; Q16822;B4DW73; Phosphoenolpyru PCK2             |
|     | 27.4026 | 27.0978 | 27.4835 | 26.9415 | 26.9239 | 26.7778 | 27.4513 | 27.284  | 26.4033 | 26.4895 | 26.1836 | 25.949  | E7ETA6 E7ETA6 PCM1                                             |
|     | 27.6225 | 28.3385 | 27.6946 | 27.4913 | 28.1313 | 27.9661 | 28.4554 | 28.3304 | 28.5354 | 28.1385 | 27.8379 | 28.6509 | P22061;F6S8N6;A P22061;F6S8N6;A Protein-L-isoaspar PCMT1       |
|     | 29.0751 | 29.1693 | 28.9168 | 28.953  | 29.2755 | 29.0599 | 28.8954 | 29.0202 | 29.2159 | 29.2984 | 29.7539 | 30.0201 | P12004 P12004 Proliferating cell n PCNA                        |
|     | 25.6632 | 26.9897 | 26.2679 | 25.9467 | 26.9533 | 26.4533 | 26.4189 | 27.2364 | 26.5715 | 26.2252 | 26.9668 | 27.8497 | Q8WWW12;Q8WWW Q8WWW12;Q8WWW PEST proteolytic s PCNP            |
| NaN | NaN     | NaN     | NaN     | NaN     | NaN     | NaN     | 24.7454 | NaN     | NaN     | NaN     | NaN     | NaN     | Q9UHG2 Q9UHG2 ProSAA5;KEP;Big s PCSK1N                         |
| NaN | NaN     | NaN     | 23.2644 | NaN     | NaN     | NaN     | 27.5834 | 26.2793 | NaN     | 23.8273 | NaN     | NaN     | Q8NBP7;Q8NBP7- Q8NBP7 Proprotein conver PCSK9                  |
|     | 26.9869 | 27.6176 | 27.3107 | 27.3094 | 27.3373 | 27.3471 | 27.0201 | 27.2325 | 27.7572 | 26.8743 | 26.736  | 26.6214 | Q9UHG3;Q9UHG Q9UHG3;Q9UHG3 Prenylcysteine ox PCYOX1            |
|     | 22.6128 | 23.5762 | 23.2871 | 23.2338 | 22.8775 | NaN     | NaN     | NaN     | NaN     | 23.0128 | NaN     | NaN     | P49585;C9J050;C P49585;C9J050;C Choline-phosphat PCYT1A        |
|     | 26.0245 | 25.4399 | 25.4414 | 25.2115 | 25.6462 | 24.3772 | 24.45   | 24.6197 | 23.9366 | 26.0578 | 25.7268 | NaN     | Q99447;Q99447- Q99447;Q99447- Ethanolamine-phc PCYT2           |
|     | 24.8545 | 25.1048 | 25.259  | 24.458  | 24.5904 | 25.079  | 24.0255 | NaN     | 25.3211 | 24.9886 | 25.1661 | 25.6584 | Q13442;F8WBW6 Q13442 28 kDa heat- and P DAP1                   |



|     |         |         |         |         |         |         |         |         |         |         |         |         |                  |                  |                     |                     |                  |        |
|-----|---------|---------|---------|---------|---------|---------|---------|---------|---------|---------|---------|---------|------------------|------------------|---------------------|---------------------|------------------|--------|
|     | 26.1248 | 27.1941 | 27.1716 | 26.403  | 27.2983 | 27.0969 | 26.6531 | 26.436  | 27.0117 | 26.5434 | 26.8458 | 26.9184 | Q9BUL8;C9J5C3;C  | Q9BUL8;C9J5C3;C  | Programmed cell i   | PDCD10              |                  |        |
|     | 25.4945 | 23.0237 | 23.7942 | 25.7026 | 23.8119 | 24.2195 | NaN     | NaN     | NaN     | NaN     | 22.7856 | NaN     | Q14690           | Q14690           | Protein RRP5 hom    | PDCCD11             |                  |        |
|     | 24.3266 | 23.1557 | 23.5001 | 23.8383 | 23.2638 | 23.6731 | 22.7546 | NaN     | NaN     | 23.1647 | 22.929  | NaN     | Q9BRP1           | Q9BRP1           | Programmed cell i   | PDCCD2L             |                  |        |
|     | 26.6959 | 24.0898 | 24.7753 | 25.0649 | 23.9283 | 23.5623 | 24.7819 | 23.5539 | 23.4706 | 23.3927 | 23.9158 | 22.6928 | Q53EL6;Q53EL6-2  | Q53EL6;Q53EL6-2  | Programmed cell i   | PDCD4               |                  |        |
|     | 27.0167 | 27.4336 | 27.1203 | 26.6865 | 27.3815 | 27.1819 | 27.1327 | 26.9576 | 27.045  | 26.8548 | 27.4426 | 27.4278 | O14737;K7EQA1;C  | O14737;K7EQA1;C  | Programmed cell i   | PDCCD5              |                  |        |
|     | 28.023  | 27.2772 | 27.0422 | 27.2829 | 26.2225 | 26.6134 | 27.1799 | 25.8139 | 25.6462 | 26.5719 | 26.1591 | 25.539  | O75340;O75340-2  | O75340;O75340-2  | Programmed cell i   | PDCCD6              |                  |        |
|     | 31.3616 | 31.5827 | 31.4099 | 31.1875 | 31.0135 | 31.4143 | 32.542  | 32.0077 | 32.5268 | 31.8395 | 31.708  | 32.3673 | Q8WUM4;Q8WUI     | Q8WUM4;Q8WUI     | Programmed cell i   | PDCCD6IP            |                  |        |
|     | 22.8581 | NaN     | Q9H2J4;H7BZP2    | Q9H2J4           | Phosducin-like prc  | PDCI3               |                  |        |
|     | 26.3153 | 25.4525 | 25.6271 | 26.3407 | 25.4616 | 25.3912 | 26.0743 | 25.7695 | 25.4242 | 26.2728 | 26.0789 | 25.8872 | Q6L8Q7;Q6L8Q7-   | Q6L8Q7;Q6L8Q7-   | 2,5-phosphodiester  | PDE12               |                  |        |
|     | 23.4367 | 24.0297 | 25.0494 | 23.6931 | 24.2589 | 25.2959 | NaN     | NaN     | NaN     | 24.1694 | 24.4691 | 24.3699 | O60658;O60658-2  | O60658;O60658-2  | High affinity cAMi  | PDEA8               |                  |        |
|     | 23.1846 | NaN     | 22.9619 | NaN     | NaN     | NaN     | 26.3055 | 25.0869 | 24.6919 | 24.2808 | 23.6854 | NaN     | Q9NRA1;Q9NRA1    | Q9NRA1;Q9NRA1    | Platelet-derived g  | PDGFC               |                  |        |
| NaN |         | 25.7465 | 26.0406 | NaN     | 25.8014 | 26.0136 | NaN     | NaN     | NaN     | 25.6828 | NaN     | NaN     | P09619           | P09619           | Platelet-derived g  | PDGFRB              |                  |        |
|     | 27.5592 | 27.4775 | 27.1077 | 27.8425 | 27.9727 | 27.3075 | 26.4819 | 27.787  | 28.2852 | 27.7707 | 28.4391 | 27.3777 | P08559;P08559-2  | P08559;P08559-2  | Pyruvate dehydro    | PDHA1               |                  |        |
|     | 27.135  | 26.1792 | 26.1404 | 27.2416 | 26.6009 | 26.4014 | 25.1536 | 26.5819 | 26.8875 | 25.7969 | 25.8882 | 25.8533 | P11177;P11177-2  | P11177;P11177-2  | Pyruvate dehydro    | PDHB                |                  |        |
| NaN | NaN     | NaN     | NaN     | NaN     | NaN     | 22.0405 | NaN     | NaN     | NaN     | NaN     | NaN     | NaN     | O00330;O00330-3  | O00330;O00330-3  | Pyruvate dehydro    | PDHX                |                  |        |
| NaN | NaN     | NaN     | 27.1601 | NaN     | H7BZJ3           | H7BZJ3           |                     | PDIA3               |                  |        |
|     | 31.1577 | 32.1604 | 31.5321 | 31.1506 | 31.9994 | 31.6566 | 31.7164 | 32.5416 | 32.5503 | 31.3272 | 31.5289 | 31.8394 | P30101           | P30101           | Protein disulfide-i | PDIA3               |                  |        |
|     | 29.856  | 29.8448 | 30.0652 | 29.7902 | 29.8748 | 30.1806 | 29.8046 | 30.7029 | 30.7453 | 29.7278 | 29.7838 | 29.8293 | P13667;C9JMN9    | P13667           | Protein disulfide-i | PDIA4               |                  |        |
| NaN | NaN     | NaN     | NaN     | 21.1782 | NaN     | NaN     | NaN     | NaN     | NaN     | 22.3584 | 21.6695 | 21.6385 | NaN              | Q14554;Q14554-2  | Q14554;Q14554-2     | Protein disulfide-i | PDIA5            |        |
|     | 30.1509 | 30.1523 | 30.0428 | 30.0132 | 30.1817 | 30.0448 | 30.1121 | 30.5046 | 30.3523 | 30.1242 | 29.9955 | 29.5405 | Q15084;Q15084-5  | Q15084;Q15084-5  | Protein disulfide-i | PDIA6               |                  |        |
| NaN | NaN     | NaN     | NaN     | 24.6224 | NaN     | Q15118;Q15118-2  | Q15118;Q15118-2  | Pyruvate dehydr     | PDK1                |                  |        |
|     | 23.804  | 23.5169 | 23.6824 | 23.8587 | 23.5873 | 23.4908 | NaN     | NaN     | NaN     | 23.6241 | 23.0557 | 23.6109 | NaN              | Q15120;Q15120-2  | Q15120;Q15120-2     | Pyruvate dehydr     | PKD3             |        |
|     | 27.2528 | 28.2792 | 27.8754 | 27.1617 | 28.1551 | 28.0026 | 27.0338 | 27.2769 | 27.3756 | 26.963  | 27.2153 | 27.6843 | O00151           | O00151           | PDZ and LIM dom     | PDLM1               |                  |        |
|     | 23.6086 | 23.4349 | NaN     | NaN     | 23.1986 | NaN     | Q96JY6;Q96JY6-5  | Q96JY6;Q96JY6-5  | PDZ and LIM dom     | PDLM2               |                  |        |
|     | 22.6325 | 23.6344 | 22.8919 | NaN     | 23.6656 | 23.5599 | NaN     | 23.9029 | 23.5272 | NaN     | NaN     | NaN     | Q53GG5;Q53GG5    | Q53GG5;Q53GG5    | PDZ and LIM dom     | PDLM3               |                  |        |
|     | 24.851  | 25.6086 | 25.1104 | 24.531  | 25.5015 | 25.3346 | 25.0755 | 25.3694 | 24.9105 | 25.803  | 25.3319 | 25.5092 | P50479;P50479-2  | P50479;P50479-2  | PDZ and LIM dom     | PDLM4               |                  |        |
|     | 28.6878 | 28.4596 | 28.381  | 28.2495 | 28.0241 | 28.2772 | 28.748  | 27.2603 | 27.5654 | 28.3392 | 27.9477 | 27.6583 | Q96HC4;Q96HC4-   | Q96HC4;Q96HC4-   | PDZ and LIM dom     | PDLM5               |                  |        |
|     | 26.8667 | 27.7197 | 27.7847 | 27.341  | 27.9225 | 28.2051 | 27.4338 | 26.9543 | 27.4356 | 28.0385 | 28.1026 | 28.4023 | Q9NR12;Q9NR12-   | Q9NR12;Q9NR12-   | PDZ and LIM dom     | PDLM7               |                  |        |
|     | 23.7319 | 23.1592 | 23.3884 | 23.6632 | 23.9662 | 23.5753 | NaN     | NaN     | NaN     | 23.1423 | NaN     | NaN     | Q9P0J1;Q9P0J1-2  | Q9P0J1;Q9P0J1-2  | Pyruvate dehydr     | PDP1                |                  |        |
|     | 23.7316 | 23.1305 | 23.0899 | 23.2718 | 22.5212 | NaN     | NaN     | NaN     | NaN     | 23.3914 | 23.1452 | NaN     | O15530;E9PER6;C  | O15530;E9PER6;C  | 3-phosphoinositid   | PDPK1;PDPK2P        |                  |        |
|     | 22.3351 | 22.3824 | 22.2779 | 22.0594 | 21.8403 | NaN     | NaN     | 22.4855 | 22.5301 | 22.9607 | 22.826  | 22.7873 | Q8NCN5;A8MT40    | Q8NCN5;A8MT40    | Pyruvate dehydro    | PDP1R               |                  |        |
|     | 27.4007 | 25.7976 | 26.4411 | 27.6676 | 26.2346 | 26.5053 | 23.3058 | 24.2807 | 24.4835 | 26.4156 | 26.6116 | 25.8873 | Q29RF7;Q29RF7-   | Q29RF7           | Sister chromatid c  | PDS5A               |                  |        |
|     | 27.2962 | 25.5301 | 26.7713 | 27.4965 | 25.9942 | 26.5795 | 24.1984 | 23.9066 | NaN     | 27.0944 | 26.0401 | 24.1305 | Q9NTI5;Q9NTI5-2  | Q9NTI5;Q9NTI5-2  | Sister chromatid c  | PDS5B               |                  |        |
|     | 24.8239 | 24.1593 | 24.8735 | 24.0047 | 23.6452 | 24.1533 | 24.6488 | NaN     | NaN     | 23.8691 | NaN     | NaN     | Q6P996;Q6P996-   | Q6P996;Q6P996-   | Pyridoxal-depend    | PDXC1               |                  |        |
|     | 26.7434 | 26.7037 | 26.2792 | 26.1347 | 26.2248 | 26.2158 | 26.5374 | 26.2902 | 26.1495 | 26.7148 | 26.4384 | 26.1983 | O00764;F22ZY4;O  | O00764;F22ZY4;O  | Pyridoxal kinase    | PDXK                |                  |        |
|     | 22.5808 | 23.7391 | 23.1726 | NaN     | 23.6185 | NaN     | NaN     | NaN     | NaN     | NaN     | 22.9577 | NaN     | Q96GD0           | Q96GD0           | Pyridoxal phosph    | PDXP                |                  |        |
|     | 22.2737 | 21.8061 | 22.8357 | 22.2156 | NaN     | NaN     | NaN     | NaN     | NaN     | 22.0705 | NaN     | NaN     | Q5EBL8;Q5EBL8-2  | Q5EBL8;Q5EBL8-2  | PDZ domain-cont     | PDZD11              |                  |        |
|     | 23.9035 | 25.1359 | 24.9087 | 24.1153 | 24.3597 | 24.3244 | 25.5076 | 24.5864 | 24.5619 | 24.6152 | NaN     | 24.447  | Q15121;B1AKZ5;C  | Q15121;B1AKZ5;C  | Astrocytic phosph   | PEA15               |                  |        |
|     | 22.0435 | 22.4433 | 22.6865 | 22.3407 | NaN     | NaN     | 22.8315 | NaN     | NaN     | 22.5236 | NaN     | NaN     | Q9H792;H3BUZ5;   | Q9H792           | Pseudopodium-er     | PEAK1               |                  |        |
|     | 29.0732 | 29.3957 | 28.8058 | 28.4592 | 28.8154 | 28.9186 | 29.9661 | 29.4014 | 28.6795 | 29.612  | 29.3132 | 29.0077 | P30086           | P30086           | Phosphatidylethar   | PEBP1               |                  |        |
|     | 27.0378 | 26.8949 | 27.1299 | 26.8785 | 26.718  | 26.5009 | 27.0486 | 26.1548 | 26.1648 | 26.9362 | 26.7163 | 26.9641 | Q9UBV8           | Q9UBV8           | Peflin              | PEF1                |                  |        |
|     | 26.242  | 25.9751 | 25.3292 | 26.2439 | 26.3519 | 25.1314 | 25.6618 | 26.9873 | 25.6128 | 25.1585 | 25.4892 | 24.7955 | Q86TG7;A0A087V   | Q86TG7;A0A087V   | Retrotransposon-    | PEG10               |                  |        |
|     | 27.7988 | 26.8098 | 27.3895 | 27.8212 | 27.0525 | 27.3389 | 26.7166 | 27.7372 | 27.3731 | 27.1337 | 27.4988 | 27.362  | Q9BRX2           | Q9BRX2           | Protein pelota ho   | PELO                |                  |        |
|     | 24.6571 | 23.5463 | 24.5477 | 25.3981 | 24.6026 | 24.5478 | NaN     | NaN     | NaN     | 23.7426 | 23.9233 | NaN     | Q8IZL8;C9JFV4;E7 | Q8IZL8;C9JFV4;E7 | Proline-, glutamic  | PELP1               |                  |        |
|     | 25.6493 | 25.8805 | 25.1693 | 25.3334 | 25.5294 | 25.1308 | 26.5168 | 26.669  | 26.1116 | 25.8179 | 25.5686 | 25.5827 | P12955;P12955-3  | P12955;P12955-3  | Xaa-Pro dipeptida   | PEPD                |                  |        |
|     | 26.9913 | 25.2892 | 26.1947 | 27.3498 | 26.3116 | 26.6068 | 24.8852 | NaN     | 24.686  | 26.0478 | 26.2343 | 25.5169 | O00541;B5MCF9;   | O00541;B5MCF9;   | Pescadillo homolc   | PES1                |                  |        |
| NaN | NaN     | NaN     | NaN     | NaN     | NaN     | NaN     | NaN     | NaN     | NaN     | NaN     | 20.5368 | NaN     | Q92968           | Q92968           | Peroxisomal mem     | PEX13               |                  |        |
|     | 22.019  | NaN     | 21.7869 | 22.2807 | NaN     | O75381;O75381-2  | O75381;O75381-2  | Peroxisomal mem     | PEX14               |                  |        |
| NaN | NaN     | NaN     | NaN     | NaN     | NaN     | NaN     | NaN     | NaN     | NaN     | 20.5482 | NaN     | NaN     | P40855;Q5QNY5;   | P40855;Q5QNY5;   | Peroxisomal bioge   | PEX19               |                  |        |
|     | 22.0804 | NaN     | 21.7665 | NaN     | P56589;Q7Z6V3    | P56589;Q7Z6V3    | Peroxisomal bioge   | PEX3                |                  |        |
|     | 23.6772 | 23.9276 | 23.8247 | NaN     | NaN     | NaN     | NaN     | NaN     | NaN     | 22.8965 | 24.0849 | 24.434  | P50542;P50542-4  | P50542;P50542-4  | Peroxisomal targe   | PEX5                |                  |        |
|     | 27.8713 | 28.2121 | 28.1232 | 27.7787 | 28.3558 | 28.1071 | 28.3666 | 28.7448 | 28.5881 | 28.2153 | 28.5582 | 29.0132 | O15067;H0YGH1;   | O15067           | Phosphoribosylfo    | PFAS                |                  |        |
|     | 26.7384 | 28.1477 | 27.5725 | 26.573  | 28.029  | 27.4237 | 27.9094 | 28.4657 | 27.5974 | 27.2783 | 27.6916 | 27.9029 | O60925;E5RGS4;C  | O60925;E5RGS4    | Prefoldin subunit   | PFDN1               |                  |        |
|     | 28.006  | 29.1107 | 28.5791 | 27.7872 | 28.8415 | 28.4273 | 28.7373 | 28.9515 | 27.9989 | 28.2681 | 28.5753 | 28.4419 | Q9UHV9           | Q9UHV9           | Prefoldin subunit   | PFDN2               |                  |        |
|     | 25.7936 | 26.2353 | 25.494  | 24.899  | 25.5721 | 25.5358 | 26.0266 | 25.9797 | 24.9151 | 25.5837 | 25.5628 | 25.9732 | Q9NQP4;E9PQY2    | Q9NQP4;E9PQY2    | Prefoldin subunit   | PFDN4               |                  |        |
|     | 27.0903 | 27.9559 | 27.5321 | 26.6756 | 27.5549 | 27.4341 | 27.6216 | 27.4121 | 26.9487 | 27.3291 | 27.4305 | 27.395  | Q99471;H3BPF6;C  | Q99471;H3BPF6;C  | Prefoldin subunit   | PFDN5               |                  |        |
|     | 26.6413 | 28.2022 | 27.5818 | 26.6732 | 27.9108 | 27.5967 | 27.8391 | 27.995  | 27.2311 | 27.4196 | 27.8991 | 27.7461 | O15212;A2A888    | O15212           | Prefoldin subunit   | PFDN6               |                  |        |
|     | 22.337  | NaN     | NaN     | 21.6935 | NaN     | O60825;O60825-2  | O60825;O60825-2  | 6-phosphofructo-    | PFKFB2              |                  |        |
|     | 22.6258 | NaN     | 22.83   | 23.0431 | 22.2438 | 22.1553 | NaN     | NaN     | NaN     | NaN     | NaN     | NaN     | Q16875;F22Z12;Q  | Q16875;F22Z12;Q  | 6-phosphofructo-    | PFKFB3              |                  |        |
|     | 22.7771 | NaN     | 22.4819 | 23.0542 | NaN     | 23.0027 | NaN              | NaN              | Q16877;C9K0D8;C     | Q16877;C9K0D8;C     | 6-phosphofructo- | PFKFB4 |



|         |         |         |         |         |         |         |         |         |         |         |         |                   |                   |                              |                           |
|---------|---------|---------|---------|---------|---------|---------|---------|---------|---------|---------|---------|-------------------|-------------------|------------------------------|---------------------------|
| 29.3214 | 28.4077 | 29.0911 | 29.3493 | 28.6857 | 29.3303 | 28.3112 | 28.7594 | 28.5145 | 28.9785 | 29.031  | 28.6908 | P17858;P17858-2   | P17858;P17858-2   | ATP-dependent 6- PFKL        |                           |
| 27.5662 | 26.5861 | 27.2204 | 27.2956 | 27.0051 | 27.3515 | 26.9785 | 27.1897 | 27.4237 | 27.69   | 27.9138 | 27.5757 | P08237;P08237-3   | P08237;P08237-3   | ATP-dependent 6- PFKM        |                           |
| 31.6731 | 30.7758 | 31.3817 | 31.5671 | 31.1037 | 31.4934 | 30.6663 | 30.8998 | 30.9319 | 31.3744 | 31.3683 | 30.8311 | Q01813;Q01813-1   | Q01813;Q01813-2   | ATP-dependent 6- PFKP        |                           |
| 32.3813 | 33.1146 | 32.4393 | 32.0513 | 32.5799 | 32.446  | 33.1636 | 32.4578 | 32.0836 | 32.7162 | 32.5829 | 32.4413 | P07737;K7EJ44;I3  | P07737;K7EJ44     | Profilin-1 PFN1              |                           |
| 26.8135 | 27.5678 | 27.3405 | 26.6866 | 27.4826 | 27.4028 | 26.9929 | 26.8179 | 27.0165 | 26.6831 | 27.3335 | 27.1129 | P35080-2;C9J0J7;I | P35080-2;C9J0J7;I | Profilin-2;Profilin PFN2     |                           |
| 31.4835 | 32.3876 | 32.0882 | 31.553  | 32.2873 | 32.1195 | 32.3946 | 32.2669 | 32.2545 | 32.3416 | 32.4503 | 32.5206 | P18669;Q8N0Y7;F   | P18669;Q8N0Y7     | Phosphoglycerate PGAM1;PGAM4 |                           |
| 27.8626 | 27.6113 | 26.9642 | 27.5744 | 27.0939 | 26.7836 | 25.7838 | 26.8891 | 26.9572 | 27.1726 | 26.8234 | 25.8802 | Q96HS1;Q96HS1-:   | Q96HS1;Q96HS1-:   | Serine/threonine- PGAM5      |                           |
| 28.5524 | 29.0201 | 28.986  | 28.4788 | 28.8294 | 28.7483 | 29.3113 | 28.5715 | 28.5008 | 29.0778 | 28.813  | 29.0586 | P52209;P52209-2   | P52209;P52209-2   | 6-phosphoglucon- PGD         |                           |
| 23.3789 | NaN     | NaN     | 22.7027 | NaN     | NaN     | NaN     | NaN     | NaN     | NaN     | 22.8363 | NaN     | P53609;P53609-2   | P53609;P53609-2   | Geranylgeranyl tr: PGGT1B    |                           |
| 32.2941 | 32.9672 | 32.6737 | 31.9911 | 32.5132 | 32.5648 | 32.8255 | 32.4162 | 32.4674 | 32.5086 | 32.5996 | 32.815  | P00558;P00558-2   | P00558;P00558-2   | Phosphoglycerate PGK1        |                           |
| 26.7353 | 27.5702 | 27.3517 | 26.6581 | 27.4405 | 27.413  | 27.0598 | 27.1778 | 27.2636 | 26.9508 | 27.3777 | 27.5518 | O95336;MOR261;I   | O95336;MOR261;I   | 6-phosphoglucon- PGLS        |                           |
| 28.3635 | 28.5765 | 28.6756 | 27.9889 | 28.3027 | 28.7143 | 28.9315 | 27.7981 | 28.2893 | 28.5289 | 28.5057 | 28.4691 | P36871;P36871-2   | P36871;P36871-2   | Phosphoglucomut PGM1         |                           |
| 27.7678 | 28.4457 | 28.0216 | 27.5549 | 28.5568 | 28.0817 | 28.1873 | 27.4301 | 28.2449 | 28.0616 | 28.2811 | 28.3831 | Q96G03;E7ENQ8;:   | Q96G03            | Phosphoglucomut PGM2         |                           |
| 26.0217 | 26.7069 | 26.3403 | 25.6529 | 26.5966 | 26.4617 | 26.2758 | 26.2119 | 26.4429 | 25.904  | 26.2134 | 26.3545 | O95394;O95394-:   | O95394;O95394-:   | Phosphoacetylglu PGM3        |                           |
| 24.2692 | 25.049  | 24.6748 | 24.3149 | 24.9369 | 24.4253 | 25.5441 | 25.814  | 26.6216 | 25.4235 | 25.6346 | 25.6384 | A6NDG6;H3BV17     | A6NDG6            | Phosphoglycolate PGP         |                           |
| NaN     | NaN     | NaN     | NaN     | 23.431  | NaN               | Q9NXJ5;U3KQ24;I   | Q9NXJ5;U3KQ24;I              | Pyroglutamyl-pep PGPEP1   |
| 26.433  | 26.0773 | 26.5898 | 26.3911 | 26.3452 | 26.7287 | 27.1766 | 27.249  | 27.3058 | 27.538  | 27.0665 | 26.7511 | O00264;O00264-2   | O00264;O00264-2   | Membrane-associ PGRCM1       |                           |
| 25.5687 | 24.9409 | 25.2096 | 25.5673 | 24.8564 | 25.0856 | 25.1911 | 25.426  | 24.8415 | 25.1255 | 24.9063 | 24.6532 | O15173;O15173-2   | O15173;O15173-2   | Membrane-associ PGRCM2       |                           |
| NaN     | NaN     | 24.1983 | 22.8058 | NaN               | J3KP75;O75167;O   | J3KP75;O75167;O              | Phosphatase and PHACTR2   |
| 22.8573 | NaN     | 23.461  | NaN     | NaN     | 22.9987 | NaN     | NaN     | NaN     | 23.3052 | 24.7109 | 23.814  | 23.7514           | Q8IZ21;Q8IZ21-3;  | Q8IZ21;Q8IZ21-3;             | Phosphatase and PHACTR4   |
| 23.0141 | NaN     | 23.0704 | 23.5863 | 22.6813 | 23.6961 | NaN     | NaN     | NaN     | 22.9952 | NaN     | NaN     | NaN               | Q9H814            | Q9H814                       | Phosphorylated a PHAX     |
| 28.1235 | 29.4781 | 28.6436 | 28.8327 | 29.6497 | 28.9228 | 27.3841 | 29.7108 | 30.5695 | 27.2679 | 28.4315 | 29.2021 | P35232;C9JW96;E   | P35232;C9JW96;E   | Inhibitin PHB                |                           |
| 28.2368 | 29.166  | 28.9237 | 28.908  | 29.5163 | 29.0806 | 27.5113 | 29.1072 | 30.1192 | 27.2319 | 28.2105 | 28.8656 | Q99623;F5GY37;J   | Q99623;F5GY37;J   | Prohibitin-2 PHB2            |                           |
| 23.162  | NaN     | 22.8228 | 23.3266 | NaN     | NaN     | NaN     | NaN     | NaN     | 22.9175 | NaN     | NaN     | NaN               | Q8IXK0;B3KPJ4;A   | Q8IXK0;B3KPJ4;A              | Polyhomeotic-like PHC2    |
| 21.9061 | NaN     | NaN     | 22.0023 | 21.8017 | NaN               | O43189;O43189-2   | O43189;O43189-2              | PHD finger protei PHF1    |
| NaN     | NaN     | 21.5164 | 22.7934 | 21.544  | NaN               | O94880;O94880-2   | O94880;O94880-2              | PHD finger protei PHF14   |
| 24.4151 | 24.4463 | 24.7445 | 24.0316 | 23.9488 | NaN     | NaN     | NaN     | NaN     | 24.0268 | NaN     | NaN     | NaN               | Q7RTV0            | Q7RTV0                       | PHD finger-like do PHF5A  |
| 24.6681 | 24.5078 | 25.3507 | 25.7977 | 25.5026 | 25.4318 | 23.5799 | NaN     | NaN     | 25.5545 | 25.5215 | 25.0004 | Q8IWS0;Q8IWS0-    | Q8IWS0;Q8IWS0-    | PHD finger protei PHF6       |                           |
| 28.2946 | 27.8738 | 28.0228 | 27.9658 | 28.0368 | 28.0944 | 28.2619 | 28.5126 | 28.2716 | 28.5915 | 28.8361 | 28.4007 | O43175;Q5SZU1     | O43175;Q5SZU1     | D-3-phosphoglyce PHGDH       |                           |
| 23.2887 | NaN     | NaN     | 23.1158 | NaN     | 22.7067 | NaN     | NaN     | NaN     | 23.0848 | NaN     | NaN     | NaN               | P46019            | P46019                       | Phosphorylase b k PHKA2   |
| 23.6701 | NaN     | 23.4248 | 23.9276 | 23.9065 | 23.928  | 23.1893 | NaN     | NaN     | 23.8018 | 23.5974 | NaN     | NaN               | Q93100-4;Q9310    | Q93100-4;Q9310               | Phosphorylase b k PHKB    |
| 24.7886 | 24.2761 | 24.1275 | 24.8569 | NaN     | 24.3083 | 24.4396 | NaN     | NaN     | NaN     | NaN     | NaN     | NaN               | P15735;J3KNN3;P   | P15735;J3KNN3;P              | Phosphorylase b k PHKG2   |
| 27.2209 | 27.4389 | 27.873  | 27.4154 | 27.52   | 28.2136 | 27.4387 | 26.7979 | 27.0401 | 28.3465 | 27.9771 | 27.4853 | Q8WV24;R4GND3     | Q8WV24;R4GND3     | Pleckstrin homolo PHLDA1     |                           |
| 25.2447 | 26.3173 | 26.2664 | 25.436  | 26.1738 | 26.0862 | 25.8668 | 26.002  | 26.3244 | 26.6583 | 26.1586 | 26.2507 | Q53GA4            | Q53GA4            | Pleckstrin homolo PHLDA2     |                           |
| 21.4512 | NaN               | Q86UU1;Q86UU1     | Q86UU1;Q86UU1                | Pleckstrin homolo PHLDB1  |
| 23.3786 | NaN     | 22.9215 | NaN               | Q86SQ0;Q86SQ0-    | Q86SQ0;Q86SQ0-               | Pleckstrin homolo PHLDB2  |
| 25.5517 | 26.1643 | 26.0188 | 25.1937 | 26.0285 | 26.1717 | 25.5188 | 26.5227 | NaN     | 25.7827 | 26.2684 | 26.2982 | Q9NRX4;Q9NRX4-    | Q9NRX4            | 14 kDa phosphohi PHPT1       |                           |
| NaN     | NaN     | NaN     | 21.7418 | NaN               | Q5SRE7;Q5SRE7-2   | Q5SRE7;Q5SRE7-2              | Phytanoyl-CoA dic PHYHD1  |
| 28.0388 | 27.856  | 27.9958 | 28.0343 | 27.5576 | 27.9783 | 27.5739 | 27.3846 | 28.0756 | 27.7165 | 27.2268 | 27.7889 | Q9BTU6;E9PAM4     | Q9BTU6;E9PAM4     | Phosphatidylinosi PI4K2A     |                           |
| 23.0388 | NaN     | 22.6542 | 22.9769 | 22.5771 | 23.1191 | NaN     | NaN     | NaN     | 22.728  | 22.5899 | NaN     | NaN               | Q8TCG2;G5E9Z4     | Q8TCG2;G5E9Z4                | Phosphatidylinosi PI4K2B  |
| 26.6934 | 26.3773 | 27.5788 | 27.0535 | 26.6002 | 27.75   | 26.5684 | 25.8265 | 25.6493 | 27.9972 | 27.102  | 27.0953 | P42356;J3KN10;P   | P42356;J3KN10     | Phosphatidylinosi PI4KA      |                           |
| 23.058  | 22.998  | NaN               | Q8WXW3;A0A087     | Q8WXW3;A0A087                | Progesterone-indr PIBF1   |
| 24.91   | 25.4362 | 25.7227 | 24.71   | 25.6292 | 25.8135 | NaN     | NaN     | NaN     | NaN     | 24.8193 | 24.3851 | NaN               | Q13492;Q13492-:   | Q13492;Q13492-:              | Phosphatidylinosi PICALM  |
| NaN     | 21.4029 | Q92508;H0YB49;E   | Q92508            | Piezo-type mecha PIEZO1      |                           |
| NaN     | 23.6357 | NaN     | 25.31   | NaN     | NaN     | 25.1404           | Q92643;A6NEM5;    | Q92643;A6NEM5;               | GPI-anchor transa PIGK    |
| 24.003  | 22.9965 | 23.8439 | 23.8939 | 23.383  | 23.5918 | 23.2414 | NaN     | 24.5696 | 23.357  | 23.4588 | 23.654  | Q96552;Q96552-2   | Q96552;Q96552-2   | GPI transamidase PIG5        |                           |
| 23.2368 | 22.7842 | 22.9258 | 22.789  | 22.802  | 23.0644 | 22.9644 | NaN     | NaN     | NaN     | NaN     | 22.6158 | Q969N2;Q969N2-    | Q969N2;Q969N2-    | GPI transamidase PIGT        |                           |
| 23.9538 | 24.2598 | 23.8169 | 23.6211 | 24.0634 | NaN     | NaN     | NaN     | NaN     | 23.4806 | 24.2807 | NaN     | NaN               | Q9NWS0;M0QYA;     | Q9NWS0;M0QYA;                | PIH1 domain-cont PIH1D1   |
| 25.2538 | 23.4322 | 24.3008 | 25.3003 | 24.0376 | 24.069  | NaN     | NaN     | NaN     | 22.3935 | 23.6691 | NaN     | NaN               | O00443;A0A0C4D    | O00443                       | Phosphatidylinosi PIK3C2A |
| 26.1873 | 25.4125 | 25.8923 | 25.6486 | 25.3469 | 25.2672 | 25.5263 | 25.9431 | 24.1923 | 25.6854 | 25.3226 | 24.7278 | Q8NEB9;A8MYT4;    | Q8NEB9;A8MYT4     | Phosphatidylinosi PIK3C3     |                           |
| NaN     | NaN     | NaN     | 21.2482 | NaN               | P42338            | P42338                       | Phosphatidylinosi PIK3CB  |
| 22.2028 | 22.9332 | 22.6649 | 22.5692 | 23.3019 | 22.7028 | 21.9314 | NaN     | NaN     | 21.9689 | NaN     | NaN     | NaN               | O00459;E9PFP1;V   | O00459;E9PFP1                | Phosphatidylinosi PIK3R2  |
| 25.9362 | 24.4674 | 25.0687 | 25.2572 | 24.3438 | 24.7825 | 24.4878 | 24.5029 | 23.7911 | 25.0291 | 25.401  | 22.9827 | Q99570;D6R9J8;D   | Q99570            | Phosphoinositide PIK3R4      |                           |
| 25.2951 | 25.6103 | 25.5579 | 24.8578 | 25.2224 | 25.4538 | 24.8824 | 24.9656 | NaN     | 24.9603 | 25.3726 | 25.1981 | Q13526;K7EN45;K   | Q13526;K7EN45;K   | Peptidyl-prolyl cis PIN1     |                           |
| 24.389  | 25.5033 | 25.3275 | NaN     | 25.5261 | 25.1412 | 25.5582 | 26.389  | 25.6598 | 23.5035 | 25.4479 | 25.9339 | Q9Y237;Q9Y237-:   | Q9Y237;Q9Y237-2   | Peptidyl-prolyl cis PIN4     |                           |
| NaN     | 21.7449 | NaN     | NaN     | NaN     | NaN     | NaN     | NaN     | 23.5574 | NaN     | 21.9702 | 23.1876 | P12273            | P12273            | Prolactin-inducibl PIP       |                           |
| 25.3513 | 25.3685 | 25.5879 | 25.1552 | 25.2608 | 26.0332 | 25.6835 | 25.3687 | 25.383  | 26.1645 | 25.8882 | 26.1362 | P48426;P48426-2   | P48426;P48426-2   | Phosphatidylinosi PIP4K2A    |                           |
| 23.5893 | 23.7433 | 24.33   | 24.1551 | 23.8691 | 24.3576 | 23.9569 | NaN     | 24.2052 | 24.638  | 24.3299 | 24.4991 | P78356;P78356-2   | P78356;P78356-2   | Phosphatidylinosi PIP4K2B    |                           |
| 24.1777 | 23.929  | 24.1672 | 23.9802 | 24.0108 | 23.9757 | 23.9974 | NaN     | NaN     | 24.3242 | 23.6412 | NaN     | NaN               | Q8TBX8;Q8TBX8-:   | Q8TBX8;Q8TBX8-:              | Phosphatidylinosi PIP4K2C |
| 26.2068 | 26.0417 | 26.2274 | 26.0212 | 26.072  | 26.6402 | 26.052  | 25.8424 | 25.9714 | 26.8983 | 26.7322 | 26.9817 | Q99755-2;A6PW5    | Q99755-2;A6PW5    | Phosphatidylinosi PIP5K1A    |                           |



|  |  |  |  |  |  |  |  |  |  |  |  |  |  |  |  |  |  |  |  |  |  |  |  |  |  |  |  |  |  |  |  |  |  |  |  |  |  |  |  |  |  |  |  |  |  |  |  |  |  |  |  |  |  |  |  |  |  |  |  |  |  |  |  |  |  |  |  |  |  |  |  |  |  |  |  |  |  |  |  |  |  |  |  |  |  |  |  |  |  |  |  |  |  |  |  |  |  |  |  |  |  |  |  |  |  |  |  |  |  |  |  |  |  |  |  |  |  |  |  |  |  |  |  |  |  |  |  |  |  |  |  |  |  |  |  |  |  |  |  |  |  |  |  |  |  |  |  |  |  |  |  |  |  |  |  |  |  |  |  |  |  |  |  |  |  |  |  |  |  |  |  |  |  |  |  |  |  |  |  |  |  |  |  |  |  |  |  |  |  |  |  |  |  |  |  |  |  |  |  |  |  |  |  |  |  |  |  |  |  |  |  |  |  |  |  |  |  |  |  |  |  |  |  |  |  |  |  |  |  |  |  |  |  |  |  |  |  |  |  |  |  |  |  |  |  |  |  |  |  |  |  |  |  |  |  |  |  |  |  |  |  |  |  |  |  |  |  |  |  |  |  |  |  |  |  |  |  |  |  |  |  |  |  |  |  |  |  |  |  |  |  |  |  |  |  |  |  |  |  |  |  |  |  |  |  |  |  |  |  |  |  |  |  |  |  |  |  |  |  |  |  |  |  |  |  |  |  |  |  |  |  |  |  |  |  |  |  |  |  |  |  |  |  |  |  |  |  |  |  |  |  |  |  |  |  |  |  |  |  |  |  |  |  |  |  |  |  |  |  |  |  |  |  |  |  |  |  |  |  |  |  |  |  |  |  |  |  |  |  |  |  |  |  |  |  |  |  |  |  |  |  |  |  |  |  |  |  |  |  |  |  |  |  |  |  |  |  |  |  |  |  |  |  |  |  |  |  |  |  |  |  |  |  |  |  |  |  |  |  |  |  |  |  |  |  |  |  |  |  |  |  |  |  |  |  |  |  |  |  |  |  |  |  |  |  |  |  |  |  |  |  |  |  |  |  |  |  |  |  |  |  |  |  |  |  |  |  |  |  |  |  |  |  |  |  |  |  |  |  |  |  |  |  |  |  |  |  |  |  |  |  |  |  |  |  |  |  |  |  |  |  |  |  |  |  |  |  |  |  |  |  |  |  |  |  |  |  |  |  |  |  |  |  |  |  |  |  |  |  |  |  |  |  |  |  |  |  |  |  |  |  |  |  |  |  |  |  |  |  |  |  |  |  |  |  |  |  |  |  |  |  |  |  |  |  |  |  |  |  |  |  |  |  |  |  |  |  |  |  |  |  |  |  |  |  |  |  |  |  |  |  |  |  |  |  |  |  |  |  |  |  |  |  |  |  |  |  |  |  |  |  |  |  |  |  |  |  |  |  |  |  |  |  |  |  |  |  |  |  |  |  |  |  |  |  |  |  |  |  |  |  |  |  |  |  |  |  |  |  |  |  |  |  |  |  |  |  |  |  |  |  |  |  |  |  |  |  |  |  |  |  |  |  |  |  |  |  |  |  |  |  |  |  |  |  |  |  |  |  |  |  |  |  |  |  |  |  |  |  |  |  |  |  |  |  |  |  |  |  |  |  |  |  |  |  |  |  |  |  |  |  |  |  |  |  |  |  |  |  |  |  |  |  |  |  |  |  |  |  |  |  |  |  |  |  |  |  |  |  |  |  |  |  |  |  |  |  |  |  |  |  |  |  |  |  |  |  |  |  |  |  |  |  |  |  |  |  |  |  |  |  |  |  |  |  |  |  |  |  |  |  |  |  |  |  |  |  |  |  |  |  |  |  |  |  |  |  |  |  |  |  |  |  |  |  |  |  |  |  |  |  |  |  |  |  |  |  |  |  |  |  |  |  |  |  |  |  |  |  |  |  |  |  |  |  |  |  |  |  |  |  |  |  |  |  |  |  |  |  |  |  |  |  |  |  |  |  |  |  |  |  |  |  |  |  |  |  |  |  |  |  |  |  |  |  |  |  |  |  |  |  |  |  |  |  |  |  |  |  |  |  |  |  |  |  |  |  |  |  |  |  |  |  |  |  |  |  |  |  |  |  |  |  |  |  |  |  |  |  |  |  |  |  |  |  |  |  |  |  |  |  |  |  |  |  |  |  |  |  |  |  |  |  |  |  |  |  |  |  |  |  |  |  |  |  |  |  |  |  |  |  |  |  |  |  |  |  |  |  |  |  |  |  |  |  |  |  |  |  |  |  |  |  |  |  |  |  |  |  |  |  |  |  |  |  |  |  |  |  |  |  |  |  |  |  |  |  |  |  |  |  |  |  |  |  |  |  |  |  |  |  |  |  |  |  |  |  |  |  |  |  |  |  |  |  |  |  |  |  |  |  |  |  |  |  |  |  |  |  |  |  |  |  |  |  |  |  |  |  |  |  |  |  |  |  |  |  |  |  |  |  |  |  |  |  |  |  |  |  |  |  |  |  |  |  |  |  |  |  |  |  |  |  |  |  |  |  |  |  |  |  |  |  |  |  |  |  |  |  |  |  |  |  |  |  |  |  |  |  |  |  |  |  |  |  |  |  |  |  |  |  |  |  |  |  |  |  |  |  |  |  |  |  |  |  |  |  |  |  |  |  |  |  |  |  |  |  |  |  |  |  |  |  |  |  |  |  |  |  |  |  |  |  |  |  |  |  |  |  |  |  |  |  |  |  |  |  |  |  |  |  |  |  |  |  |  |  |  |  |  |  |  |  |  |  |  |  |  |  |  |  |  |  |  |  |  |  |  |  |  |  |  |  |  |  |  |  |  |  |  |  |  |  |  |  |  |  |  |  |  |  |  |  |  |  |  |  |  |  |  |  |  |  |  |  |  |  |  |  |  |  |  |  |  |  |  |  |  |  |  |  |  |  |  |  |  |  |  |  |  |  |  |  |  |  |  |  |  |  |  |  |  |  |  |  |  |  |  |  |  |  |  |  |  |  |  |  |  |  |  |  |  |  |  |  |  |  |  |  |  |  |  |  |  |  |  |  |  |  |  |  |  |  |  |  |  |
|--|--|--|--|--|--|--|--|--|--|--|--|--|--|--|--|--|--|--|--|--|--|--|--|--|--|--|--|--|--|--|--|--|--|--|--|--|--|--|--|--|--|--|--|--|--|--|--|--|--|--|--|--|--|--|--|--|--|--|--|--|--|--|--|--|--|--|--|--|--|--|--|--|--|--|--|--|--|--|--|--|--|--|--|--|--|--|--|--|--|--|--|--|--|--|--|--|--|--|--|--|--|--|--|--|--|--|--|--|--|--|--|--|--|--|--|--|--|--|--|--|--|--|--|--|--|--|--|--|--|--|--|--|--|--|--|--|--|--|--|--|--|--|--|--|--|--|--|--|--|--|--|--|--|--|--|--|--|--|--|--|--|--|--|--|--|--|--|--|--|--|--|--|--|--|--|--|--|--|--|--|--|--|--|--|--|--|--|--|--|--|--|--|--|--|--|--|--|--|--|--|--|--|--|--|--|--|--|--|--|--|--|--|--|--|--|--|--|--|--|--|--|--|--|--|--|--|--|--|--|--|--|--|--|--|--|--|--|--|--|--|--|--|--|--|--|--|--|--|--|--|--|--|--|--|--|--|--|--|--|--|--|--|--|--|--|--|--|--|--|--|--|--|--|--|--|--|--|--|--|--|--|--|--|--|--|--|--|--|--|--|--|--|--|--|--|--|--|--|--|--|--|--|--|--|--|--|--|--|--|--|--|--|--|--|--|--|--|--|--|--|--|--|--|--|--|--|--|--|--|--|--|--|--|--|--|--|--|--|--|--|--|--|--|--|--|--|--|--|--|--|--|--|--|--|--|--|--|--|--|--|--|--|--|--|--|--|--|--|--|--|--|--|--|--|--|--|--|--|--|--|--|--|--|--|--|--|--|--|--|--|--|--|--|--|--|--|--|--|--|--|--|--|--|--|--|--|--|--|--|--|--|--|--|--|--|--|--|--|--|--|--|--|--|--|--|--|--|--|--|--|--|--|--|--|--|--|--|--|--|--|--|--|--|--|--|--|--|--|--|--|--|--|--|--|--|--|--|--|--|--|--|--|--|--|--|--|--|--|--|--|--|--|--|--|--|--|--|--|--|--|--|--|--|--|--|--|--|--|--|--|--|--|--|--|--|--|--|--|--|--|--|--|--|--|--|--|--|--|--|--|--|--|--|--|--|--|--|--|--|--|--|--|--|--|--|--|--|--|--|--|--|--|--|--|--|--|--|--|--|--|--|--|--|--|--|--|--|--|--|--|--|--|--|--|--|--|--|--|--|--|--|--|--|--|--|--|--|--|--|--|--|--|--|--|--|--|--|--|--|--|--|--|--|--|--|--|--|--|--|--|--|--|--|--|--|--|--|--|--|--|--|--|--|--|--|--|--|--|--|--|--|--|--|--|--|--|--|--|--|--|--|--|--|--|--|--|--|--|--|--|--|--|--|--|--|--|--|--|--|--|--|--|--|--|--|--|--|--|--|--|--|--|--|--|--|--|--|--|--|--|--|--|--|--|--|--|--|--|--|--|--|--|--|--|--|--|--|--|--|--|--|--|--|--|--|--|--|--|--|--|--|--|--|--|--|--|--|--|--|--|--|--|--|--|--|--|--|--|--|--|--|--|--|--|--|--|--|--|--|--|--|--|--|--|--|--|--|--|--|--|--|--|--|--|--|--|--|--|--|--|--|--|--|--|--|--|--|--|--|--|--|--|--|--|--|--|--|--|--|--|--|--|--|--|--|--|--|--|--|--|--|--|--|--|--|--|--|--|--|--|--|--|--|--|--|--|--|--|--|--|--|--|--|--|--|--|--|--|--|--|--|--|--|--|--|--|--|--|--|--|--|--|--|--|--|--|--|--|--|--|--|--|--|--|--|--|--|--|--|--|--|--|--|--|--|--|--|--|--|--|--|--|--|--|--|--|--|--|--|--|--|--|--|--|--|--|--|--|--|--|--|--|--|--|--|--|--|--|--|--|--|--|--|--|--|--|--|--|--|--|--|--|--|--|--|--|--|--|--|--|--|--|--|--|--|--|--|--|--|--|--|--|--|--|--|--|--|--|--|--|--|--|--|--|--|--|--|--|--|--|--|--|--|--|--|--|--|--|--|--|--|--|--|--|--|--|--|--|--|--|--|--|--|--|--|--|--|--|--|--|--|--|--|--|--|--|--|--|--|--|--|--|--|--|--|--|--|--|--|--|--|--|--|--|--|--|--|--|--|--|--|--|--|--|--|--|--|--|--|--|--|--|--|--|--|--|--|--|--|--|--|--|--|--|--|--|--|--|--|--|--|--|--|--|--|--|--|--|--|--|--|--|--|--|--|--|--|--|--|--|--|--|--|--|--|--|--|--|--|--|--|--|--|--|--|--|--|--|--|--|--|--|--|--|--|--|--|--|--|--|--|--|--|--|--|--|--|--|--|--|--|--|--|--|--|--|--|--|--|--|--|--|--|--|--|--|--|--|--|--|--|--|--|--|--|--|--|--|--|--|--|--|--|--|--|--|--|--|--|--|--|--|--|--|--|--|--|--|--|--|--|--|--|--|--|--|--|--|--|--|--|--|--|--|--|--|--|--|--|--|--|--|--|--|--|--|--|--|--|--|--|--|--|--|--|--|--|--|--|--|--|--|--|--|--|--|--|--|--|--|--|--|--|--|--|--|--|--|--|--|--|--|--|--|--|--|--|--|--|--|--|--|--|--|--|--|--|--|--|--|--|--|--|--|--|--|--|--|--|--|--|--|--|--|--|--|--|--|--|--|--|--|--|--|--|--|--|--|--|--|--|--|--|--|--|--|--|--|--|--|--|--|--|--|--|--|--|--|--|--|--|--|--|--|--|--|--|--|--|--|--|--|--|--|--|--|--|--|--|--|--|--|--|--|--|--|--|--|--|--|--|--|--|--|--|--|--|--|--|--|--|--|--|--|--|--|--|--|--|--|--|--|--|--|--|--|--|--|--|--|--|--|--|--|--|--|--|--|--|--|--|--|--|--|--|--|--|--|--|--|--|--|--|--|--|--|--|--|--|--|--|--|--|--|--|--|--|--|--|--|--|--|--|--|--|--|--|--|--|--|--|--|--|--|--|--|
|  |  |  |  |  |  |  |  |  |  |  |  |  |  |  |  |  |  |  |  |  |  |  |  |  |  |  |  |  |  |  |  |  |  |  |  |  |  |  |  |  |  |  |  |  |  |  |  |  |  |  |  |  |  |  |  |  |  |  |  |  |  |  |  |  |  |  |  |  |  |  |  |  |  |  |  |  |  |  |  |  |  |  |  |  |  |  |  |  |  |  |  |  |  |  |  |  |  |  |  |  |  |  |  |  |  |  |  |  |  |  |  |  |  |  |  |  |  |  |  |  |  |  |  |  |  |  |  |  |  |  |  |  |  |  |  |  |  |  |  |  |  |  |  |  |  |  |  |  |  |  |  |  |  |  |  |  |  |  |  |  |  |  |  |  |  |  |  |  |  |  |  |  |  |  |  |  |  |  |  |  |  |  |  |  |  |  |  |  |  |  |  |  |  |  |  |  |  |  |  |  |  |  |  |  |  |  |  |  |  |  |  |  |  |  |  |  |  |  |  |  |  |  |  |  |  |  |  |  |  |  |  |  |  |  |  |  |  |  |  |  |  |  |  |  |  |  |  |  |  |  |  |  |  |  |  |  |  |  |  |  |  |  |  |  |  |  |  |  |  |  |  |  |  |  |  |  |  |  |  |  |  |  |  |  |  |  |  |  |  |  |  |  |  |  |  |  |  |  |  |  |  |  |  |  |  |  |  |  |  |  |  |  |  |  |  |  |  |  |  |  |  |  |  |  |  |  |  |  |  |  |  |  |  |  |  |  |  |  |  |  |  |  |  |  |  |  |  |  |  |  |  |  |  |  |  |  |  |  |  |  |  |  |  |  |  |  |  |  |  |  |  |  |  |  |  |  |  |  |  |  |  |  |  |  |  |  |  |  |  |  |  |  |  |  |  |  |  |  |  |  |  |  |  |  |  |  |  |  |  |  |  |  |  |  |  |  |  |  |  |  |  |  |  |  |  |  |  |  |  |  |  |  |  |  |  |  |  |  |  |  |  |  |  |  |  |  |  |  |  |  |  |  |  |  |  |  |  |  |  |  |  |  |  |  |  |  |  |  |  |  |  |  |  |  |  |  |  |  |  |  |  |  |  |  |  |  |  |  |  |  |  |  |  |  |  |  |  |  |  |  |  |  |  |  |  |  |  |  |  |  |  |  |  |  |  |  |  |  |  |  |  |  |  |  |  |  |  |  |  |  |  |  |  |  |  |  |  |  |  |  |  |  |  |  |  |  |  |  |  |  |  |  |  |  |  |  |  |  |  |  |  |  |  |  |  |  |  |  |  |  |  |  |  |  |  |  |  |  |  |  |  |  |  |  |  |  |  |  |  |  |  |  |  |  |  |  |  |  |  |  |  |  |  |  |  |  |  |  |  |  |  |  |  |  |  |  |  |  |  |  |  |  |  |  |  |  |  |  |  |  |  |  |  |  |  |  |  |  |  |  |  |  |  |  |  |  |  |  |  |  |  |  |  |  |  |  |  |  |  |  |  |  |  |  |  |  |  |  |  |  |  |  |  |  |  |  |  |  |  |  |  |  |  |  |  |  |  |  |  |  |  |  |  |  |  |  |  |  |  |  |  |  |  |  |  |  |  |  |  |  |  |  |  |  |  |  |  |  |  |  |  |  |  |  |  |  |  |  |  |  |  |  |  |  |  |  |  |  |  |  |  |  |  |  |  |  |  |  |  |  |  |  |  |  |  |  |  |  |  |  |  |  |  |  |  |  |  |  |  |  |  |  |  |  |  |  |  |  |  |  |  |  |  |  |  |  |  |  |  |  |  |  |  |  |  |  |  |  |  |  |  |  |  |  |  |  |  |  |  |  |  |  |  |  |  |  |  |  |  |  |  |  |  |  |  |  |  |  |  |  |  |  |  |  |  |  |  |  |  |  |  |  |  |  |  |  |  |  |  |  |  |  |  |  |  |  |  |  |  |  |  |  |  |  |  |  |  |  |  |  |  |  |  |  |  |  |  |  |  |  |  |  |  |  |  |  |  |  |  |  |  |  |  |  |  |  |  |  |  |  |  |  |  |  |  |  |  |  |  |  |  |  |  |  |  |  |  |  |  |  |  |  |  |  |  |  |  |  |  |  |  |  |  |  |  |  |  |  |  |  |  |  |  |  |  |  |  |  |  |  |  |  |  |  |  |  |  |  |  |  |  |  |  |  |  |  |  |  |  |  |  |  |  |  |  |  |  |  |  |  |  |  |  |  |  |  |  |  |  |  |  |  |  |  |  |  |  |  |  |  |  |  |  |  |  |  |  |  |  |  |  |  |  |  |  |  |  |  |  |  |  |  |  |  |  |  |  |  |  |  |  |  |  |  |  |  |  |  |  |  |  |  |  |  |  |  |  |  |  |  |  |  |  |  |  |  |  |  |  |  |  |  |  |  |  |  |  |  |  |  |  |  |  |  |  |  |  |  |  |  |  |  |  |  |  |  |  |  |  |  |  |  |  |  |  |  |  |  |  |  |  |  |  |  |  |  |  |  |  |  |  |  |  |  |  |  |  |  |  |  |  |  |  |  |  |  |  |  |  |  |  |  |  |  |  |  |  |  |  |  |  |  |  |  |  |  |  |  |  |  |  |  |  |  |  |  |  |  |  |  |  |  |  |  |  |  |  |  |  |  |  |  |  |  |  |  |  |  |  |  |  |  |  |  |  |  |  |  |  |  |  |  |  |  |  |  |  |  |  |  |  |  |  |  |  |  |  |  |  |  |  |  |  |  |  |  |  |  |  |  |  |  |  |  |  |  |  |  |  |  |  |  |  |  |  |  |  |  |  |  |  |  |  |  |  |  |  |  |  |  |  |  |  |  |  |  |  |  |  |  |  |  |  |  |  |  |  |  |  |  |  |  |  |  |  |  |  |  |  |  |  |  |  |  |  |  |  |  |  |  |  |  |  |  |  |  |  |  |  |  |  |  |  |  |  |  |  |  |  |  |  |  |  |  |  |  |  |  |  |  |  |  |  |  |  |  |  |  |  |  |  |  |  |  |  |  |  |  |  |  |  |  |  |  |  |  |  |  |  |  |  |  |  |  |  |  |  |  |  |  |  |  |  |  |  |  |
|--|--|--|--|--|--|--|--|--|--|--|--|--|--|--|--|--|--|--|--|--|--|--|--|--|--|--|--|--|--|--|--|--|--|--|--|--|--|--|--|--|--|--|--|--|--|--|--|--|--|--|--|--|--|--|--|--|--|--|--|--|--|--|--|--|--|--|--|--|--|--|--|--|--|--|--|--|--|--|--|--|--|--|--|--|--|--|--|--|--|--|--|--|--|--|--|--|--|--|--|--|--|--|--|--|--|--|--|--|--|--|--|--|--|--|--|--|--|--|--|--|--|--|--|--|--|--|--|--|--|--|--|--|--|--|--|--|--|--|--|--|--|--|--|--|--|--|--|--|--|--|--|--|--|--|--|--|--|--|--|--|--|--|--|--|--|--|--|--|--|--|--|--|--|--|--|--|--|--|--|--|--|--|--|--|--|--|--|--|--|--|--|--|--|--|--|--|--|--|--|--|--|--|--|--|--|--|--|--|--|--|--|--|--|--|--|--|--|--|--|--|--|--|--|--|--|--|--|--|--|--|--|--|--|--|--|--|--|--|--|--|--|--|--|--|--|--|--|--|--|--|--|--|--|--|--|--|--|--|--|--|--|--|--|--|--|--|--|--|--|--|--|--|--|--|--|--|--|--|--|--|--|--|--|--|--|--|--|--|--|--|--|--|--|--|--|--|--|--|--|--|--|--|--|--|--|--|--|--|--|--|--|--|--|--|--|--|--|--|--|--|--|--|--|--|--|--|--|--|--|--|--|--|--|--|--|--|--|--|--|--|--|--|--|--|--|--|--|--|--|--|--|--|--|--|--|--|--|--|--|--|--|--|--|--|--|--|--|--|--|--|--|--|--|--|--|--|--|--|--|--|--|--|--|--|--|--|--|--|--|--|--|--|--|--|--|--|--|--|--|--|--|--|--|--|--|--|--|--|--|--|--|--|--|--|--|--|--|--|--|--|--|--|--|--|--|--|--|--|--|--|--|--|--|--|--|--|--|--|--|--|--|--|--|--|--|--|--|--|--|--|--|--|--|--|--|--|--|--|--|--|--|--|--|--|--|--|--|--|--|--|--|--|--|--|--|--|--|--|--|--|--|--|--|--|--|--|--|--|--|--|--|--|--|--|--|--|--|--|--|--|--|--|--|--|--|--|--|--|--|--|--|--|--|--|--|--|--|--|--|--|--|--|--|--|--|--|--|--|--|--|--|--|--|--|--|--|--|--|--|--|--|--|--|--|--|--|--|--|--|--|--|--|--|--|--|--|--|--|--|--|--|--|--|--|--|--|--|--|--|--|--|--|--|--|--|--|--|--|--|--|--|--|--|--|--|--|--|--|--|--|--|--|--|--|--|--|--|--|--|--|--|--|--|--|--|--|--|--|--|--|--|--|--|--|--|--|--|--|--|--|--|--|--|--|--|--|--|--|--|--|--|--|--|--|--|--|--|--|--|--|--|--|--|--|--|--|--|--|--|--|--|--|--|--|--|--|--|--|--|--|--|--|--|--|--|--|--|--|--|--|--|--|--|--|--|--|--|--|--|--|--|--|--|--|--|--|--|--|--|--|--|--|--|--|--|--|--|--|--|--|--|--|--|--|--|--|--|--|--|--|--|--|--|--|--|--|--|--|--|--|--|--|--|--|--|--|--|--|--|--|--|--|--|--|--|--|--|--|--|--|--|--|--|--|--|--|--|--|--|--|--|--|--|--|--|--|--|--|--|--|--|--|--|--|--|--|--|--|--|--|--|--|--|--|--|--|--|--|--|--|--|--|--|--|--|--|--|--|--|--|--|--|--|--|--|--|--|--|--|--|--|--|--|--|--|--|--|--|--|--|--|--|--|--|--|--|--|--|--|--|--|--|--|--|--|--|--|--|--|--|--|--|--|--|--|--|--|--|--|--|--|--|--|--|--|--|--|--|--|--|--|--|--|--|--|--|--|--|--|--|--|--|--|--|--|--|--|--|--|--|--|--|--|--|--|--|--|--|--|--|--|--|--|--|--|--|--|--|--|--|--|--|--|--|--|--|--|--|--|--|--|--|--|--|--|--|--|--|--|--|--|--|--|--|--|--|--|--|--|--|--|--|--|--|--|--|--|--|--|--|--|--|--|--|--|--|--|--|--|--|--|--|--|--|--|--|--|--|--|--|--|--|--|--|--|--|--|--|--|--|--|--|--|--|--|--|--|--|--|--|--|--|--|--|--|--|--|--|--|--|--|--|--|--|--|--|--|--|--|--|--|--|--|--|--|--|--|--|--|--|--|--|--|--|--|--|--|--|--|--|--|--|--|--|--|--|--|--|--|--|--|--|--|--|--|--|--|--|--|--|--|--|--|--|--|--|--|--|--|--|--|--|--|--|--|--|--|--|--|--|--|--|--|--|--|--|--|--|--|--|--|--|--|--|--|--|--|--|--|--|--|--|--|--|--|--|--|--|--|--|--|--|--|--|--|--|--|--|--|--|--|--|--|--|--|--|--|--|--|--|--|--|--|--|--|--|--|--|--|--|--|--|--|--|--|--|--|--|--|--|--|--|--|--|--|--|--|--|--|--|--|--|--|--|--|--|--|--|--|--|--|--|--|--|--|--|--|--|--|--|--|--|--|--|--|--|--|--|--|--|--|--|--|--|--|--|--|--|--|--|--|--|--|--|--|--|--|--|--|--|--|--|--|--|--|--|--|--|--|--|--|--|--|--|--|--|--|--|--|--|--|--|--|--|--|--|--|--|--|--|--|--|--|--|--|--|--|--|--|--|--|--|--|--|--|--|--|--|--|--|--|--|--|--|--|--|--|--|--|--|--|--|--|--|--|--|--|--|--|--|--|--|--|--|--|--|--|--|--|--|--|--|--|--|--|--|--|--|--|--|--|--|--|--|--|--|--|--|--|--|--|--|--|--|--|--|--|--|--|--|--|--|--|--|--|--|--|--|--|--|--|--|--|--|--|--|--|--|--|--|--|--|--|--|--|--|--|--|--|--|--|--|--|--|--|--|--|--|--|--|--|--|--|--|--|--|--|--|--|--|--|--|--|--|--|--|--|--|--|--|--|--|--|--|--|--|--|--|--|--|--|--|--|--|--|--|



|         |         |         |         |         |         |         |         |         |         |         |         |                                                                  |                                                                 |
|---------|---------|---------|---------|---------|---------|---------|---------|---------|---------|---------|---------|------------------------------------------------------------------|-----------------------------------------------------------------|
| 22.9094 | NaN     | NaN     | 23.1483 | NaN     | 23.3377 | NaN     | NaN     | NaN     | 23.7661 | 23.9899 | NaN     | Q96T60;MOQYH2; Q96T60;MOQYH2; Bifunctional polyn PNKP            |                                                                 |
| NaN     | NaN     | 24.0378 | NaN     | Q9UL42 Q9UL42 Paraneoplastic an PNMA2                            |                                                                 |
| 27.1811 | 26.5932 | 26.797  | 27.5672 | 26.4214 | 26.6861 | 25.4275 | 26.6568 | 24.5835 | 25.872  | 26.6763 | 25.6484 | Q9H307;Q9H307- Q9H307;Q9H307- Pinin PNN                          |                                                                 |
| 24.9494 | 22.364  | 23.4296 | 25.2739 | 22.5232 | 24.0848 | 21.738  | NaN     | 23.5083 | 22.7979 | NaN     | NaN     | Q9NRX1;F8WBJ6 Q9NRX1;F8WBJ6 RNA-binding prot PNO1                |                                                                 |
| 28.9695 | 29.9317 | 29.3418 | 28.8757 | 29.4802 | 29.0855 | 29.7887 | 29.4194 | 29.5197 | 29.4794 | 29.4295 | 29.6207 | P00491;G3V5M2; P00491;G3V5M2 Purine nucleoside PNP               |                                                                 |
| 21.9032 | NaN     | NaN     | 20.9427 | NaN     | Q96AD5;A0A087V Q96AD5;A0A087V Patatin-like phosph PNPLA2         |                                                                 |
| 24.3709 | 24.6518 | 24.0542 | 24.716  | 24.309  | NaN     | NaN     | 24.6612 | NaN     | 24.3808 | 24.3008 | NaN     | Q8IY17;Q8IY17-2; Q8IY17;Q8IY17-2; Neuropathy targe PNPLA6        |                                                                 |
| 23.6174 | 25.1881 | 24.6802 | 23.67   | 24.8281 | 24.6154 | NaN     | 24.4359 | NaN     | 23.6939 | 24.3085 | 24.1622 | Q9NV59;Q9NV59- Q9NV59;Q9NV59- Pyridoxine-5-phos PNPO             |                                                                 |
| 25.9998 | 25.8547 | 25.5576 | 26.1903 | 26.4315 | 25.7279 | 24.5601 | 25.7768 | 26.1551 | 24.7996 | 25.3314 | 25.2586 | Q8TCS8;H7BXF6;F Q8TCS8 Polyribonucleotid; PNPT1                  |                                                                 |
| 28.3257 | 28.1669 | 28.7427 | 28.9695 | 28.251  | 29.1496 | 28.9859 | 27.9459 | 28.2945 | 29.9352 | 29.1643 | 28.45   | O00592;O00592-2 O00592;O00592-2 Podocalyxin PODXL                |                                                                 |
| 24.9484 | 25.3305 | 25.2852 | 25.0726 | 25.2497 | 25.4527 | 24.9768 | 25.7122 | 26.6429 | 25.6408 | 25.5581 | 25.4058 | Q9H488;Q9H488- Q9H488;Q9H488- GDP-fucose prote POFUT1            |                                                                 |
| 22.4396 | NaN     | 22.0703 | 23.0862 | 21.9846 | 22.1572 | NaN     | NaN     | NaN     | 22.801  | 22.4548 | NaN     | Q7Z3K3;Q7Z3K3-5 Q7Z3K3;Q7Z3K3-5 Pogo transposabl; POGZ           |                                                                 |
| 26.2382 | NaN     | 25.1773 | 24.629  | NaN     | NaN     | NaN     | NaN     | 26.1018 | 25.3434 | 26.1714 | NaN     | P09884;A0A087W P09884;A0A087W DNA polymerase ; POLA1             |                                                                 |
| 23.7694 | NaN     | 23.8937 | 24.2125 | 23.3537 | 23.854  | NaN     | NaN     | NaN     | 24.2697 | 24.6561 | NaN     | P28340;M0R2B7;I P28340;M0R2B7;I DNA polymerase ; POLD1           |                                                                 |
| 23.2256 | 22.667  | 22.8147 | 23.5162 | 23.225  | 23.4423 | NaN     | NaN     | NaN     | 23.9948 | 23.928  | NaN     | P49005;F8W8R3; P49005;F8W8R3; DNA polymerase ; POLD2             |                                                                 |
| NaN     | NaN     | NaN     | 21.6088 | NaN     | Q15054 Q15054 DNA polymerase ; POLD3                             |                                                                 |
| 23.8839 | 24.4498 | 23.7067 | 23.9503 | 24.2773 | 23.6127 | 23.615  | 24.0454 | 24.8101 | 23.3151 | 23.9398 | 23.951  | Q9Y257;B4DEM9 Q9Y257;B4DEM9 Polymerase delta- POLDI2             |                                                                 |
| 24.0279 | 23.9659 | 23.7408 | 23.898  | 24.3118 | 23.9216 | NaN     | NaN     | NaN     | NaN     | NaN     | NaN     | Q9BY77;Q9BY77-; Q9BY77;Q9BY77-; Polymerase delta- POLDI3         |                                                                 |
| NaN     | 20.4973 | NaN     | P56282;P56282-2 P56282;P56282-2 DNA polymerase ; POLE2           |                                                                 |
| 22.4958 | 22.9665 | 22.9748 | 22.7363 | 23.4095 | NaN     | NaN     | 24.1037 | 23.6465 | 23.8291 | 23.8462 | 24.2023 | Q9NRF9 Q9NRF9 DNA polymerase ; POLE3                             |                                                                 |
| 26.1622 | 23.4175 | 24.1077 | 25.5317 | 23.8022 | 23.5658 | NaN     | NaN     | NaN     | 23.3981 | 22.4557 | NaN     | O95602;B9ZVN9 O95602;B9ZVN9 DNA-directed RN/ POLR1A              |                                                                 |
| 23.4749 | NaN     | 22.9132 | 23.5798 | NaN     | 23.021  | NaN     | NaN     | NaN     | NaN     | NaN     | NaN     | Q9H9Y6;Q9H9Y6- Q9H9Y6;Q9H9Y6- DNA-directed RN/ POLR1B            |                                                                 |
| 26.5157 | 26.0424 | 25.9572 | 26.541  | 26.3315 | 26.066  | 25.6232 | 26.347  | 25.807  | 26.4791 | 26.4648 | 26.116  | O15160;E7EQB9;C O15160;E7EQB9;C DNA-directed RN/ POLR1C          |                                                                 |
| NaN     | NaN     | NaN     | 22.4871 | NaN     | Q9Y250;Q9Y250-2 Q9Y250;Q9Y250-2 DNA-directed RN/ POLR1D          |                                                                 |
| 23.9445 | NaN     | NaN     | 23.9973 | NaN     | Q9GZ51-2;Q9GZ5 Q9GZ51-2;Q9GZ5: DNA-directed RN/ POLR1E           |                                                                 |
| 27.4809 | 24.4751 | 25.4647 | 26.1269 | 24.4777 | 25.3281 | 24.8248 | NaN     | 22.8642 | 23.8812 | NaN     | NaN     | P24928;A0A0C4D P24928;A0A0C4D; DNA-directed RN/ POLR2A           |                                                                 |
| 27.4139 | 25.6829 | 26.5285 | 27.1807 | 26.1838 | 26.1628 | 25.2286 | NaN     | 24.8132 | 26.109  | 25.8047 | 24.5156 | P30876;C9J2Y9;C P30876;C9J2Y9;C DNA-directed RN/ POLR2B          |                                                                 |
| 24.5738 | 24.7468 | 23.9498 | 24.2188 | 23.9675 | 23.7246 | NaN     | 24.5463 | NaN     | NaN     | 23.9419 | 24.0313 | P19387;H3BRR2 P19387 DNA-directed RN/ POLR2C                     |                                                                 |
| 26.5698 | 26.6417 | 26.3216 | 26.6122 | 26.9864 | 26.3069 | 25.3435 | 27.03   | 25.7657 | 25.8313 | 26.5111 | 26.2188 | P19388;A0A087W P19388;A0A087W DNA-directed RN/ POLR2E            |                                                                 |
| 26.6118 | 27.1968 | 26.8859 | 26.8373 | 27.0871 | 26.9996 | 25.7227 | NaN     | 26.3141 | 25.3248 | 26.324  | 26.8924 | P52434;C9JLU1;P P52434;C9JLU1;P DNA-directed RN/ POLR2H          |                                                                 |
| 24.4727 | 24.5158 | 23.9676 | 24.2255 | 24.5462 | 23.9173 | NaN     | NaN     | NaN     | NaN     | 24.2713 | 24.576  | NaN                                                              | P52435;Q9GZM3; P52435;Q9GZM3; DNA-directed RN/ POLR2I;POLR2I2;P |
| NaN     | NaN     | NaN     | 23.7467 | NaN     | P62875 P62875 DNA-directed RN/ POLR2L                            |                                                                 |
| 24.0282 | NaN     | 23.2833 | 23.4898 | NaN     | 22.6357 | NaN     | NaN     | NaN     | 23.1936 | NaN     | NaN     | O14802;Q7Z755;F O14802 DNA-directed RN/ POLR3A                   |                                                                 |
| NaN     | NaN     | NaN     | 21.4783 | NaN     | Q9NW08;Q9NW0 Q9NW08;Q9NW0 DNA-directed RN/ POLR3B                |                                                                 |
| NaN     | NaN     | NaN     | NaN     | 21.9283 | NaN     | Q9BUI4;E9PHH9 Q9BUI4;E9PHH9 DNA-directed RN/ POLR3C              |                                                                 |
| NaN     | 21.2437 | NaN     | NaN     | E7ERZ2;F8WDV1;I E7ERZ2;F8WDV1;I DNA-directed RN/ POLR3H          |                                                                 |
| NaN     | NaN     | NaN     | 21.7128 | NaN     | O00411;K7EMH3 O00411;K7EMH3 DNA-directed RN/ POLRMT              |                                                                 |
| 23.2453 | 23.2481 | 23.2925 | 23.8488 | 24.0816 | 23.3537 | NaN     | NaN     | NaN     | 23.4785 | 23.5683 | NaN     | Q99575;E5RK39 Q99575 Ribonucleases P/I POP1                      |                                                                 |
| 24.2337 | 23.9746 | 23.7204 | 24.3437 | 24.1812 | 23.6406 | NaN     | NaN     | NaN     | 24.2612 | 24.5742 | 24.0219 | O75817;C9JYM0 O75817;C9JYM0 Ribonuclease P pr POP7               |                                                                 |
| 25.5494 | 24.99   | 24.9937 | 25.5108 | 24.8336 | 24.9757 | 26.0056 | 25.8505 | 25.9177 | 26.1335 | 25.7709 | 24.965  | P16435;H0Y4R2;E P16435;H0Y4R2;E NADPH-cytochro POR               |                                                                 |
| NaN     | NaN     | NaN     | NaN     | NaN     | NaN     | 23.7811 | NaN     | NaN     | NaN     | NaN     | NaN     | Q658J3 Q658J3 POTE ankryrin dom POTE                             |                                                                 |
| NaN     | 24.0668 | 25.0383 | NaN     | 24.6978 | 25.4905 | 22.9588 | 24.6224 | NaN     | 25.1174 | 24.9353 | 24.8059 | Q9BYX7 Q9BYX7 Putative beta-acti POTEKP                          |                                                                 |
| 22.396  | NaN     | P14859;P14859-5 P14859;P14859-5 POU domain, clas POU2F1;POU2F2;f |                                                                 |
| 28.4506 | 29.0567 | 28.5882 | 28.3188 | 28.9401 | 28.4693 | 29.0685 | 28.2887 | 28.8385 | 28.4509 | 28.7519 | 29.2208 | Q15181;Q55QT6 Q15181;Q55QT6 Inorganic pyrophosph PPA1            |                                                                 |
| NaN     | NaN     | NaN     | NaN     | 23.6981 | NaN     | A0A0C4DGB9 A0A0C4DGB9 PP2A                                       |                                                                 |
| 24.6288 | 24.3385 | 24.1602 | 24.2427 | 24.0418 | 24.176  | NaN     | NaN     | 24.7374 | 23.984  | 24.0065 | 24.4015 | Q9H2U2;Q9H2U2 Q9H2U2;Q9H2U2 Inorganic pyrophosph PPA2            |                                                                 |
| 25.052  | 24.3472 | 24.4691 | 25.3422 | 24.1986 | 24.4098 | 23.6474 | NaN     | NaN     | 23.9699 | 24.8644 | NaN     | Q9NQ55;A0A0A6 Q9NQ55;A0A0A6 Suppressor of SW PPAN;PPAN-P2RY      |                                                                 |
| 25.2956 | 24.2647 | 25.6125 | 24.9616 | 24.9301 | 24.8304 | 24.8326 | NaN     | NaN     | 26.0933 | 24.8207 | NaN     | O14494;O14494-2 O14494;O14494-2 Lipid phosphate p PPAP2A         |                                                                 |
| NaN     | NaN     | NaN     | NaN     | NaN     | NaN     | 21.6886 | NaN     | NaN     | NaN     | NaN     | NaN     | O14495 O14495 Lipid phosphate p PPAP2B                           |                                                                 |
| 24.4722 | 24.6241 | 24.7465 | 24.6384 | 24.7672 | 24.8739 | 24.5725 | 24.6186 |         | 24.9761 | 25.1216 | 24.9143 | Q06203;D6RCC8;I Q06203 Amidophosphorib PPAT                      |                                                                 |
| 23.8252 | 23.5207 | 23.9843 | 23.5754 | 24.4941 | 23.9466 | NaN     | NaN     | NaN     | 23.7126 | NaN     | NaN     | Q9HAB8;Q9HAB8 Q9HAB8;Q9HAB8 Phosphopantothe PPCS                 |                                                                 |
| 23.6033 | 23.6446 | 23.8427 | 23.3809 | 23.2323 | 24.0776 | 24.1678 | 24.083  | NaN     | 23.4659 | 23.3687 | 24.362  | Q13136;Q13136-2 Q13136;Q13136-2 Liprin-alpha-1 PPFI1A            |                                                                 |
| 24.8172 | 24.9412 | 24.9394 | 24.4668 | 24.5506 | 24.4897 | 25.5297 | 24.9205 |         | 24.4321 | 24.3147 | 24.7096 | Q86W92;Q86W92 Q86W92;Q86W92 Liprin-beta-1 PPFIBP1                |                                                                 |
| NaN     | NaN     | NaN     | 23.0163 | NaN     | Q8NEY8;Q8NEY8- Q8NEY8;Q8NEY8- Periphilin-1 PPHLN1                |                                                                 |
| 31.8716 | 33.0195 | 32.3533 | 31.7579 | 32.7319 | 32.6843 | 32.42   | 32.4988 | 32.5664 | 32.4639 | 32.6285 | 32.9642 | P62937;F8WE65;C P62937;F8WE65;C Peptidyl-prolyl cis PPIA         |                                                                 |
| 29.6229 | 29.7382 | 29.9068 | 29.8536 | 29.7051 | 30.053  | 29.429  | 29.5422 | 30.2479 | 29.7682 | 29.5151 | 29.3388 | P23284 P23284 Peptidyl-prolyl cis PPIB                           |                                                                 |
| 27.5853 | 27.268  | 27.2598 | 27.1082 | 27.0235 | 27.2768 | 26.9786 | 27.4362 | 27.1765 | 27.1009 | 27.1048 | 27.0837 | Q08752;H0Y8J0 Q08752 Peptidyl-prolyl cis PPID                    |                                                                 |
| 23.3953 | 24.3857 | 23.321  | 23.3546 | 23.93   | 23.3742 | NaN     | NaN     | 23.7626 | 24.2225 | 24.0389 | 24.3862 | Q9UNP9;Q9UNP9 Q9UNP9;Q9UNP9 Peptidyl-prolyl cis PPIE             |                                                                 |
| 24.7024 | 26.7501 | 25.2932 | 25.0083 | 26.577  | 25.0452 | 24.8006 | 25.6763 | 26.8051 | 24.4903 | 26.0083 | 26.3539 | P30405;R4GN99; P30405;R4GN99; Peptidyl-prolyl cis PPIF           |                                                                 |
| 24.494  | NaN     | NaN     | 24.4754 | NaN     | Q13427;C9JN15;C Q13427;C9JN15;C Peptidyl-prolyl cis PPIG         |                                                                 |



|     |         |         |         |         |         |         |         |         |         |         |         |         |                 |                 |                     |                     |                 |
|-----|---------|---------|---------|---------|---------|---------|---------|---------|---------|---------|---------|---------|-----------------|-----------------|---------------------|---------------------|-----------------|
|     | 23.8712 | 24.7537 | 24.3903 | 23.9878 | 24.9393 | 24.7691 | 24.1611 | NaN     | NaN     |         | 24.5654 | 24.9579 | 25.0187         | O43447;C9JQD4;C | O43447;C9JQD4;C     | Peptidyl-prolyl cis | PPIH            |
|     | 27.1642 | 27.1939 | 27.2716 | 27.0898 | 27.0099 | 27.213  | 26.2519 | NaN     |         | 26.1204 | 27.4434 | 27.3471 | 27.2959         | Q9Y3C6          | Q9Y3C6              | Peptidyl-prolyl cis | PPIL1           |
|     | 24.2741 | 24.8944 | 24.3207 | 24.2525 | 24.5002 | 24.3556 | 24.1033 | NaN     | NaN     |         | 24.2864 | 23.9413 | 24.3707         | Q9H2H8;H7BZ14;I | Q9H2H8;H7BZ14;I     | Peptidyl-prolyl cis | PPIL3           |
| NaN |         | 22.9663 | NaN     | 23.3535 | NaN     | NaN     | NaN     | NaN     | NaN     |         | 22.7061 | 22.7951 | 22.6087         | Q8WUA2          | Q8WUA2              | Peptidyl-prolyl cis | PPIL4           |
|     | 25.0362 | 23.5939 | 24.802  | 25.5542 | 23.8489 | 24.2716 | 23.4496 | NaN     |         | 23.5361 | 24.681  | 24.4203 | NaN             | O43314;A0A087W  | O43314;A0A087W      | Inositol hexakisph  | PPIP5K2         |
|     | 23.5279 | 24.3244 | 24.2845 | 23.7444 | 24.1045 | 23.9983 | 24.0859 | NaN     |         | 24.1434 | NaN     | 23.8074 | 24.4457         | P35813;P35813-3 | P35813;P35813-3     | Protein phosphat    | PPM1A           |
|     | 25.397  | 25.3619 | 25.3857 | 24.6768 | 25.1278 | 25.1985 | 25.2612 | 25.3833 | 25.2913 | 25.2896 | 25.0938 | 25.4456 | O75688;B8ZZF0;C | O75688;B8ZZF0;C | Protein phosphat    | PPM1B               |                 |
|     | 20.9272 | NaN             | O75688-2        | O75688-2            | Protein phosphat    | PPM1B           |
|     | 26.2766 | 26.7646 | 26.6164 | 26.33   | 26.628  | 26.6387 | 26.9242 | 26.6905 | 27.0897 | 26.8092 | 26.8997 | 27.5339 | P49593;P49593-2 | P49593;P49593-2 | Protein phosphat    | PPM1F               |                 |
|     | 27.8364 | 27.4349 | 27.9586 | 28.1689 | 27.8992 | 28.1518 | 27.4231 | 27.9571 | 27.5703 | 28.2604 | 28.7294 | 28.7001 | O15355          | O15355          | Protein phosphat    | PPM1G               |                 |
|     | 27.0407 | 27.0755 | 27.0177 | 26.722  | 27.0757 | 27.0874 | 27.1826 | 26.5335 | 25.9007 | 26.73   | 26.6744 | 26.55   | Q9Y570;Q9Y570-4 | Q9Y570;Q9Y570-4 | Protein phosphat    | PPME1               |                 |
| NaN | NaN     | NaN     | 21.469  | 22.3534 | NaN     | 21.8251 | NaN     | NaN     | NaN     | NaN     | 21.4075 | 21.2255 | NaN             | P50336;H0YFP3   | P50336              | Protoporphyrinog    | PPOX            |
|     | 29.6727 | 29.2125 | 29.8886 | 29.6953 | 29.7798 | 30.063  | 28.5535 | 28.724  | 29.0779 | 30.4162 | 30.6051 | 29.9237 | P62136;P62136-2 | P62136;P62136-2 | Serine/threonine-   | PPP1CA              |                 |
|     | 27.8981 | 27.5846 | 27.8398 | 27.7838 | 27.8271 | 28.0918 | 27.3271 | 27.2429 | 27.6051 | 28.1417 | 28.5433 | 27.7331 | P62140;E7ETD8;C | P62140;E7ETD8   | Serine/threonine-   | PPP1CB              |                 |
|     | 26.9578 | 26.2399 | 26.4103 | 26.4116 | 26.4946 | 26.3298 | 26.2315 | 26.8576 | 26.2744 | 26.6417 | 26.7567 | 26.9734 | P36873;P36873-2 | P36873;P36873-2 | Serine/threonine-   | PPP1CC              |                 |
| NaN | NaN     | NaN     | NaN     | NaN     | NaN     | NaN     | 21.7433 | NaN     | NaN     | NaN     | NaN     | NaN     | NaN             | O60927          | O60927              | Protein phosphat    | PPP1R11         |
|     | 29.6639 | 29.3904 | 29.4056 | 28.9101 | 29.2742 | 29.1742 | 30.0999 | 29.811  | 27.1942 | 28.9563 | 28.9328 | 28.8837 | O14974;O14974-4 | O14974;O14974-4 | Protein phosphat    | PPP1R12A            |                 |
|     | 21.4853 | NaN     | NaN     | NaN     | 21.747  | NaN             | Q9BZL4;Q9BZL4-3 | Q9BZL4;Q9BZL4-3     | Protein phosphat    | PPP1R12C        |
|     | 24.6595 | 24.7607 | 24.7621 | 24.3129 | 24.7653 | 24.536  | 23.9513 | 24.3038 | 24.0716 | 24.0361 | 24.1962 | 24.5057 | Q8WUF5;A0A087W  | Q8WUF5          | RelA-associated ir  | PPP1R13L            |                 |
| NaN |         | 26.4426 | 25.6256 | 24.557  | 25.8139 | 25.1283 | 25.911  | NaN     | 25.3065 | 24.9679 | NaN     | 26.2001 | Q96C90;Q8TAE6   | Q96C90          | Protein phosphat    | PPP1R14B            |                 |
| NaN |         | 23.5727 | 24.1489 | 23.2358 | 24.2274 | NaN     | NaN     | NaN     | 23.638  | 24.382  | 23.8679 | 23.889  | Q96I34;A0A087W  | Q96I34          | Protein phosphat    | PPP1R16A            |                 |
|     | 27.0062 | 27.9813 | 28.1247 | 27.2347 | 28.3839 | 28.2056 | 27.2365 | 27.524  | 27.2597 | 28.3443 | 28.0002 | 28.3689 | Q6NYC8;A0A0G2J  | Q6NYC8;A0A0G2J  | Phostensin          | PPP1R18             |                 |
|     | 25.0156 | 24.5387 | 24.8029 | 24.3186 | NaN     | 24.3514 | 24.8028 | NaN     | NaN     | 24.015  | 24.1242 | NaN     | P41236;E7EMN6;I | P41236;E7EMN6;I | Protein phosphat    | PPP1R2P3            |                 |
|     | 20.6619 | NaN             | Q6ZMI0;Q6ZMI0-  | Q6ZMI0;Q6ZMI0-      | Protein phosphat    | PPP1R21         |
|     | 25.2551 | 25.7989 | 25.527  | 24.7733 | 25.6114 | 25.6333 | 24.9322 | 24.3508 | NaN     | 25.0035 | 25.0408 | 25.1648 | Q15435;Q15435-1 | Q15435;Q15435-1 | Protein phosphat    | PPP1R7              |                 |
|     | 22.948  | NaN     | 22.8646 | 23.2598 | NaN     | NaN     | NaN     | NaN     | NaN     | 23.0665 | NaN     | NaN     | NaN             | Q12972;A0A0A0N  | Q12972              | Nuclear inhibitor   | PPP1R8          |
|     | 24.8208 | 24.0366 | 25.0962 | 24.7778 | 24.5823 | 24.9534 | 24.2676 | NaN     | NaN     | 23.9497 | 23.9548 | NaN     | NaN             | Q96S83;D3DXT6   | Q96S83;D3DXT6       | Neurabin-2          | PPP1R9B         |
|     | 29.2195 | 28.2142 | 28.4403 | 28.7214 | 28.4112 | 28.4186 | 28.3864 | 28.3178 | 27.8483 | 28.8798 | 29.0027 | 27.8436 | P67775;P67775-2 | P67775;P67775-2 | Serine/threonine-   | PPP2CA              |                 |
|     | 29.6857 | 29.6546 | 29.7503 | 29.5186 | 29.7061 | 29.6378 | 29.8079 | 30.0158 | 29.9401 | 29.8892 | 29.9443 | 30.0641 | P30153;C9J9C1;B | P30153;C9J9C1;B | Serine/threonine-   | PPP2R1A             |                 |
|     | 27.3155 | 26.3419 | 26.7234 | 27.0634 | 26.6773 | 26.7176 | 26.1574 | 26.4989 | 25.4426 | 26.4233 | 26.5559 | 26.3016 | P30154;P30154-2 | P30154;P30154-2 | Serine/threonine-   | PPP2R1B             |                 |
|     | 27.8192 | 27.5777 | 27.7574 | 27.7207 | 27.0806 | 27.5598 | 28.116  | 27.6949 | 27.4208 | 28.2348 | 28.2454 | 27.2737 | P63151;P63151-2 | P63151;P63151-2 | Serine/threonine-   | PPP2R2A             |                 |
| NaN | NaN     | NaN     | NaN     | NaN     | NaN     | NaN     | 22.367  | NaN     | NaN     | NaN     | NaN     | NaN     | NaN             | Q66LE6          | Q66LE6              | Serine/threonine-   | PPP2R2D         |
|     | 24.7218 | 24.9924 | 25.1871 | 24.3731 | 25.1918 | 25.1959 | 25.1135 | NaN     | NaN     |         | 25.1703 | 24.9603 | 25.7207         | Q15257;A6PVN5;I | Q15257;A6PVN5;I     | Serine/threonine-   | PPP2R4;DKFzp781 |
| NaN |         | 24.0008 | NaN     | NaN     | 24.3972 | NaN             | Q15172;Q15172-  | Q15172;Q15172-2     | Serine/threonine-   | PPP2R5A         |
|     | 25.233  | 23.4564 | 24.5078 | 24.1139 | 23.2994 | NaN     | 23.2697 | NaN     |         | 22.9999 | NaN     | NaN     | NaN             | Q13362;Q13362-4 | Q13362;Q13362-4     | Serine/threonine-   | PPP2R5C         |
|     | 26.8062 | 26.0144 | 26.4943 | 26.2219 | 25.9784 | 26.5012 | 26.2112 | 25.7381 | 26.0207 | 26.3113 | 26.2448 | 26.3042 | Q14738;E9PFR3;C | Q14738;E9PFR3;C | Serine/threonine-   | PPP2R5D             |                 |
|     | 26.1095 | 25.4599 | 25.8986 | 25.8764 | 25.513  | 25.9285 | 25.7565 | NaN     |         | 25.2676 | 25.8491 | 25.8307 | 25.761          | Q16537;Q16537-  | Q16537;Q16537-2     | Serine/threonine-   | PPP2R5E         |
|     | 26.8916 | 27.3833 | 27.5708 | 27.0734 | 27.2417 | 27.6894 | 27.9416 | 27.6502 | 27.4067 | 28.4203 | 28.1928 | 27.8633 | Q08209-2;Q08205 | Q08209-2;Q08205 | Serine/threonine-   | PPP3CA              |                 |
|     | 23.2791 | 23.7472 | 23.9749 | 23.4904 | 23.8333 | 23.9021 | 24.0638 | 23.7484 | NaN     | 23.8385 | 23.6141 | 24.4041 | P16298;P16298-3 | P16298;P16298-3 | Serine/threonine-   | PPP3CB              |                 |
|     | 25.7316 | 24.9675 | 24.9802 | 24.8654 | 25.3075 | 25.119  | 24.4003 | 25.379  | 24.7723 | 25.0212 | 25.0227 | 24.4685 | P60510;H3BTA2;H | P60510;H3BTA2;H | Serine/threonine-   | PPP4C               |                 |
|     | 25.7508 | 24.9729 | 25.2223 | 25.5919 | 25.2532 | 25.4428 | 25.0998 | 25.833  | 25.5912 | 25.8729 | 25.6995 | 25.5068 | Q8TF05;Q8TF05-2 | Q8TF05;Q8TF05-2 | Serine/threonine-   | PPP4R1              |                 |
|     | 24.6423 | 23.9474 | 24.2874 | 24.7002 | 24.8043 | 24.523  | 23.7495 | NaN     | NaN     | 24.4242 | 24.8589 | 24.8039 | Q9NY27;C9IZ04;Q | Q9NY27;C9IZ04;Q | Serine/threonine-   | PPP4R2              |                 |
|     | 26.3425 | 26.5972 | 26.5616 | 26.3761 | 26.4908 | 26.3935 | 27.0081 | 27.0567 | 27.2359 | 26.7167 | 26.7868 | 26.9726 | P53041;H0YDU8;F | P53041;H0YDU8;F | Serine/threonine-   | PPP5C               |                 |
|     | 27.3485 | 26.9845 | 26.9914 | 27.2244 | 27.2063 | 27.2608 | 26.697  | 27.2707 | 27.5416 | 27.3164 | 27.396  | 27.2385 | O00743;O00743-2 | O00743;O00743-2 | Serine/threonine-   | PPP6C               |                 |
|     | 25.0295 | 24.4233 | 24.4767 | 24.8778 | 25.2813 | 24.6831 | 24.8673 | 25.2187 | 24.7578 | 24.7165 | 25.2577 | 24.8735 | Q9UPN7;K7EM28   | Q9UPN7          | Serine/threonine-   | PPP6R1              |                 |
|     | 21.1797 | NaN     | 21.3781 | NaN             | O75170;O75170-2 | O75170;O75170-2     | Serine/threonine-   | PPP6R2          |
|     | 26.2235 | 25.211  | 25.6989 | 25.7369 | 25.0091 | 25.4418 | 25.6217 | NaN     | 26.3    | 25.8318 | 25.9488 | 26.4312 | Q5H9R7;H7BXH2;I | Q5H9R7;H7BXH2;I | Serine/threonine-   | PPP6R3              |                 |
|     | 24.4996 | 25.0909 | 24.1815 | 24.4561 | 24.376  | 24.3102 | 27.1614 | 26.1074 | 26.6341 | 25.5445 | 25.801  | 25.4423 | P50897;E9PIA8;E | P50897;E9PIA8;E | Palmitoyl-protein   | PPT1                |                 |
|     | 24.2738 | 24.0546 | 24.0493 | 23.9718 | 24.5522 | 24.2889 | NaN     | NaN     | NaN     | 24.1786 | 24.5553 | 24.1341 | Q96BP3;F5H7P7;C | Q96BP3;F5H7P7;C | Peptidylprolyl isor | PPWD1               |                 |
|     | 22.4829 | NaN     | 22.7085 | 22.433  | 23.2464 | NaN     | NaN     | NaN     | NaN     | 22.4778 | 23.3828 | NaN     | NaN             | O60828;O60828-3 | O60828;O60828-3     | Polyglutamine-bir   | QQBP1           |
| NaN | NaN     | NaN     | NaN     | 23.7091 | NaN             | O60831;A6NP52   | O60831;A6NP52       | PRA1 family prote   | PRAF2           |
|     | 26.7127 | 27.0594 | 27.3275 | 26.4728 | 26.5879 | 26.9631 | 28.8396 | 28.6501 | 28.7162 | 27.4159 | 27.0128 | 27.4113 | O43663-4;O43663 | O43663-4;O43663 | Protein regulator   | PRC1                |                 |
|     | 24.6539 | 25.6388 | 24.5212 | 24.2381 | 25.1167 | 24.3912 | 27.8154 | 27.3716 | 27.1248 | 26.2823 | 26.1382 | 26.378  | P42785;P42785-2 | P42785;P42785-2 | Lysosomal Pro-X c   | PRCP                |                 |
|     | 31.4349 | 32.1195 | 31.705  | 31.3468 | 32.0461 | 31.7648 | 32.151  | 32.2621 | 32.2619 | 32.0729 | 32.3039 | 32.5059 | Q06830;A0A0A0N  | Q06830;A0A0A0N  | Peroxioredoxin-1    | PRDX1               |                 |
|     | 30.0632 | 30.7673 | 30.3646 | 29.6242 | 30.4164 | 30.1887 | 30.4152 | 30.7071 | 30.7851 | 30.2916 | 30.833  | 31.1902 | P32119;A6NIW5;F | P32119;A6NIW5   | Peroxioredoxin-2    | PRDX2               |                 |
|     | 28.1739 | 28.5327 | 28.1669 | 28.0261 | 28.1968 | 28.1499 | 28.0135 | 28.1    |         |         |         |         |                 |                 |                     |                     |                 |



|     |         |         |         |         |         |         |         |         |         |         |         |         |                 |                 |                            |
|-----|---------|---------|---------|---------|---------|---------|---------|---------|---------|---------|---------|---------|-----------------|-----------------|----------------------------|
|     | 26.1781 | 26.2123 | 26.4468 | 25.9183 | 26.0412 | 26.383  | 26.4024 | 26.5025 | 26.831  | 26.4937 | 26.2687 | 26.7012 | P48147;H0Y5Y0   | P48147          | Prolyl endopeptid PREP     |
| NaN | NaN     | NaN     | NaN     | 22.1905 | NaN     | Q4J6C6;Q4J6C6-4 | Q4J6C6;Q4J6C6-4 | Prolyl endopeptid PREPL    |
|     | 23.8462 | 22.6058 | 23.1402 | 23.2346 | NaN     | 22.7936 | NaN     | NaN     | NaN     | 23.5811 | 22.2764 | NaN     | P49642;F8VNY2;F | P49642;F8VNY2   | DNA primase sma PRIM1      |
|     | 22.0388 | NaN     | 22.3646 | 22.1771 | NaN     | P49643;P49643-2 | P49643          | DNA primase larg PRIM2     |
|     | 26.952  | 26.5899 | 26.7142 | 26.8474 | 26.6039 | 26.8093 | 26.6242 | NaN     | 26.2557 | 26.7662 | 26.7674 | 26.4237 | Q13131;Q13131-1 | Q13131;Q13131-2 | 5-AMP-activated j PRKAA1   |
|     | 24.3809 | 24.3556 | 23.9625 | 23.9439 | 24.3475 | 23.982  | NaN     | NaN     | 24.2966 | 23.3242 | 23.7648 | 23.9934 | Q9Y478;O43741;F | Q9Y478          | 5-AMP-activated j PRKAB1   |
|     | 26.0552 | 25.7099 | 26.2542 | 25.2389 | 25.1743 | 25.5361 | 26.3725 | 25.9356 | 26.1111 | 25.4671 | 24.7684 | NaN     | P17612;P17612-2 | P17612;P17612-2 | cAMP-dependent PRKAC       |
|     | 27.0256 | 26.4645 | 27.0666 | 26.2777 | 25.9203 | 26.6546 | 27.6478 | 26.6839 | 27.0074 | 26.9431 | 26.6477 | 26.5852 | P22694;P22694-2 | P22694;P22694-2 | cAMP-dependent PRKACB      |
|     | 25.2136 | 24.295  | 24.9821 | 25.1649 | 24.3584 | 24.4438 | NaN     | NaN     | 23.792  | 24.322  | 24.3415 | 23.6484 | P54619;P54619-3 | P54619;P54619-3 | 5-AMP-activated j PRKAG1   |
| NaN | NaN     | NaN     | NaN     | 22.6394 | NaN     | NaN     | NaN     | NaN     | NaN     | NaN     | 22.4749 | NaN     | Q9UGJ0;E9PGP6;C | Q9UGJ0;E9PGP6;C | 5-AMP-activated j PRKAG2   |
|     | 28.9447 | 29.0181 | 29.3446 | 28.2094 | 28.4609 | 28.3884 | 29.371  | 29.2067 | 28.3343 | 27.884  | 27.8851 | 28.1538 | P10644;P10644-2 | P10644;P10644-2 | cAMP-dependent PRKAR1A     |
|     | 21.1018 | NaN     | 21.6725 | NaN     | NaN     | NaN     | 21.9807 | NaN     | NaN     | 21.6744 | NaN     | NaN     | P31321;H7BYW5;I | P31321;H7BYW5;I | cAMP-dependent PRKAR1B     |
|     | 28.112  | 27.9942 | 28.111  | 28.3139 | 28.2655 | 28.2403 | 28.5783 | 28.8847 | 28.8883 | 28.4754 | 28.6948 | 29.2413 | P13861;P13861-2 | P13861;P13861-2 | cAMP-dependent PRKAR2A     |
|     | 22.3787 | NaN     | NaN     | 21.4227 | NaN     | P31323          | P31323          | cAMP-dependent PRKAR2B     |
|     | 29.2156 | 28.5921 | 29.0387 | 29.4837 | 28.9617 | 29.0726 | 27.8436 | 27.1643 | 27.454  | 28.264  | 27.6308 | 27.3087 | P17252;J3KRN5;P | P17252          | Protein kinase C a PRKCA   |
|     | 26.0991 | 26.0558 | 25.9096 | 25.7837 | 26.2107 | 25.9649 | 26.165  | 25.6025 | 26.4895 | 26.6946 | 26.4788 | 26.6721 | Q05655;Q05655-1 | Q05655;Q05655-2 | Protein kinase C d PRKCD   |
|     | 26.9548 | 27.6435 | 27.4878 | 27.5686 | 27.4257 | 27.6044 | 26.6373 | 27.467  | 26.9406 | 27.0787 | 27.4058 | 26.6906 | Q969G5;E9PIE3   | Q969G5;E9PIE3   | Protein kinase C c PRKCCBP |
|     | 27.2575 | 26.0247 | 26.5012 | 26.4994 | 26.2306 | 26.3921 | 25.8712 | 26.0867 | 26.3888 | 26.0886 | 25.8895 | 26.476  | P41743;Q05513;E | P41743          | Protein kinase C i PRKCI   |
|     | 28.0882 | 28.492  | 28.6313 | 28.2575 | 28.5985 | 28.8288 | 29.3133 | 30.5622 | 30.3111 | 29.0667 | 29.3463 | 29.6185 | K7ELL7;P14314;P | K7ELL7;P14314;P | Glucosidase 2 sub PRKCSH   |
|     | 21.4695 | NaN     | 21.799  | 21.7778 | NaN     | 21.2753 | NaN     | NaN     | NaN     | 21.371  | 21.8097 | NaN     | O94806;C9JKP8;H | O94806          | Serine/threonine- PRKD3    |
|     | 30.7438 | 29.327  | 30.0641 | 30.9165 | 29.8034 | 30.2815 | 28.9898 | 28.1735 | 28.7355 | 30.0992 | 30.004  | 29.3038 | P78527;P78527-2 | P78527;P78527-2 | DNA-dependent p PRKDC      |
|     | 25.4734 | 24.7472 | 25.1946 | 25.6804 | 24.8788 | 24.9528 | NaN     | NaN     | NaN     | 23.9895 | 24.5702 | 23.9994 | O75569;O75569-1 | O75569;O75569-3 | Interferon-inducib PRKRA   |
|     | 29.1818 | 27.9126 | 27.8657 | 28.4952 | 27.7073 | 28.0189 | 27.7036 | 27.5368 | 27.4883 | 28.7507 | 28.4938 | 27.6705 | Q99873;Q99873-1 | Q99873;Q99873-4 | Protein arginine N PRMT1   |
|     | 26.1915 | 24.8741 | 25.3877 | 25.5822 | 25.1671 | 25.0118 | 24.9832 | 24.9138 | NaN     | 24.5063 | 24.7339 | 24.5937 | O60678;A0A0A0N  | O60678;A0A0A0N  | Protein arginine N PRMT3   |
|     | 28.935  | 28.0834 | 28.2627 | 28.8165 | 28.5395 | 28.4403 | 27.8287 | 28.6849 | 28.3317 | 28.3549 | 28.6086 | 28.4453 | O14744;O14744-2 | O14744;O14744-2 | Protein arginine N PRMT5   |
| NaN | NaN     | NaN     | NaN     | 21.2132 | NaN     | Q96LA8;Q96LA8-1 | Q96LA8;Q96LA8-2 | Protein arginine N PRMT6   |
|     | 23.0262 | NaN     | 21.921  | 22.3517 | NaN     | NaN     | NaN     | NaN     | NaN     | 23.1667 | NaN     | NaN     | Q9NVMM4;Q9NVMM  | Q9NVMM4;Q9NVMM  | Protein arginine N PRMT7   |
| NaN | NaN     | NaN     | NaN     | NaN     | NaN     | NaN     | NaN     | NaN     | NaN     | 22.3551 | NaN     | NaN     | Q6P2P2;Q6P2P2-1 | Q6P2P2;Q6P2P2-2 | Putative protein a PRMT9   |
|     | 25.3837 | NaN     | NaN     | 24.9677 | 23.7513 | NaN     | P04156;A2A2V1;P | P04156;A2A2V1;P | Major prion prote PRNP     |
|     | 23.5303 | 24.192  | 23.5451 | 23.4551 | 23.977  | NaN     | 25.4963 | 25.2934 | NaN     | 23.3765 | NaN     | 23.9179 | Q9UNN8;A0A0U1   | Q9UNN8;A0A0U1   | Endothelial protei PROCR   |
|     | 24.4301 | 24.9771 | 24.6893 | 24.4787 | 24.865  | NaN     | 24.7201 | 24.6481 | 24.492  | 24.4761 | 24.2037 | 25.1001 | O94903;E5RG77;E | O94903;E5RG77;E | Proline synthase c PROSC   |
|     | 26.4358 | 26.8904 | 26.4366 | 26.1153 | 26.2127 | 26.2007 | 25.8054 | 25.8027 | NaN     | 25.9494 | 25.1871 | 24.8263 | Q86WR7;D3DRR9   | Q86WR7;D3DRR9   | Proline and serine PRPF4   |
|     | 29.3844 | 28.9759 | 28.9269 | 29.3723 | 29.4169 | 29.146  | 27.8746 | 28.2967 | 28.0893 | 28.9095 | 29.0745 | 28.8452 | Q9UMS4;F5GY56;  | Q9UMS4;F5GY56   | Pre-mRNA-proces PRPF19     |
|     | 24.7005 | 24.0136 | 24.2129 | 25.0344 | 24.7234 | 24.4174 | 23.1263 | 24.1162 | NaN     | 23.2332 | 23.7958 | NaN     | O43395;O43395-1 | O43395          | U4/U6 small nucle PRPF3    |
|     | 26.7301 | 25.3285 | 25.921  | 26.7652 | 25.849  | 26.0831 | 24.2541 | NaN     | 23.9875 | 26.2099 | 25.9551 | 24.5309 | Q8WWY3;E7EVX8   | Q8WWY3;E7EVX8   | U4/U6 small nucle PRPF31   |
|     | 23.8663 | NaN     | 23.4573 | 23.8959 | NaN     | NaN     | NaN     | NaN     | NaN     | NaN     | 23.5323 | NaN     | Q8NAV1          | Q8NAV1          | Pre-mRNA-splicing PRPF38A  |
|     | 24.3054 | 23.1703 | 23.4636 | 23.8461 | 23.7953 | 23.7153 | NaN     | NaN     | NaN     | 24.1837 | 24.1013 | NaN     | Q5VTL8;A0A0A0N  | Q5VTL8;A0A0A0N  | Pre-mRNA-splicing PRPF38B  |
|     | 27.2291 | 25.9767 | 26.2155 | 26.6484 | 26.7729 | 26.2996 | 25.8496 | 25.2537 | 25.3368 | 27.8704 | 28.1717 | 26.309  | O43172;O43172-1 | O43172;O43172-2 | U4/U6 small nucle PRPF4    |
|     | 27.7717 | 26.191  | 26.7286 | 27.7762 | 26.3712 | 26.9858 | 25.676  | 24.9235 | 23.5585 | 26.9859 | 27.0156 | 26.0855 | O75400;O75400-1 | O75400;O75400-2 | Pre-mRNA-proces PRPF40A    |
|     | 23.9781 | NaN     | 23.7452 | 24.4373 | 23.9518 | 23.946  | NaN     | NaN     | 23.2156 | 23.9043 | 23.8529 | 23.6401 | Q13523;H0YDJ3   | Q13523;H0YDJ3   | Serine/threonine- PRPF4B   |
|     | 27.8038 | 26.5324 | 27.4612 | 28.4313 | 27.568  | 27.0978 | 23.6735 | 24.5006 | 23.2831 | 27.7266 | 27.5902 | 26.0235 | O94906;O94906-1 | O94906;O94906-2 | Pre-mRNA-proces PRPF6      |
|     | 30.3791 | 28.6834 | 29.5869 | 30.5138 | 29.2866 | 29.7459 | 28.18   | 28.0504 | 27.826  | 29.816  | 29.6363 | 29.144  | Q6P2Q9;I3L3Z8;I | Q6P2Q9          | Pre-mRNA-proces PRPF8      |
|     | 28.5128 | 27.9576 | 27.9735 | 28.1681 | 27.7173 | 28.1545 | 28.3099 | 27.5454 | 27.2249 | 28.3831 | 27.9584 | 27.4832 | P60891;B1ALA9;P | P60891;B1ALA9;P | Ribose-phosphate PRPS1     |
|     | 27.1515 | 27.018  | 26.7903 | 26.9552 | 26.5635 | 27.0279 | 26.5372 | 26.6964 | 26.4489 | 27.2206 | 27.2764 | 26.896  | P11908;P11908-2 | P11908;P11908-2 | Ribose-phosphate PRPS2     |
|     | 26.5766 | 25.7288 | 25.8689 | 26.3989 | 25.8633 | 25.9629 | 25.5726 | 25.2991 | 25.4738 | 26.366  | 26.6455 | 25.9643 | Q14558;Q14558-1 | Q14558;Q14558-2 | Phosphoribosyl py PRPSAP1  |
|     | 26.705  | 26.3165 | 26.1746 | 26.4081 | 26.3215 | 26.1404 | 26.598  | 25.7118 | 25.7208 | 26.7012 | 26.1755 | 26.8618 | O60256;O60256-1 | O60256;O60256-4 | Phosphoribosyl py PRPSAP2  |
| NaN | NaN     | NaN     | 26.37   | NaN     | Q5THK1;C9J9V0;F | Q5THK1;C9J9V0;H | Protein PRR14L             |
|     | 27.4151 | 27.462  | 27.2864 | 27.0188 | 27.2228 | 27.1483 | 27.0492 | 26.8694 | 26.4957 | 26.4261 | 26.7824 | 26.436  | Q96M27;Q96M27   | Q96M27;Q96M27   | Protein PRRC1              |
|     | 25.8006 | 25.361  | 24.645  | 24.6804 | 24.5531 | 24.1976 | NaN     | 24.0632 | NaN     | NaN     | 24.825  | NaN     | P48634;P48634-2 | P48634;P48634-2 | Protein PRRC2A             |
|     | 26.2821 | 25.7197 | 25.529  | 25.035  | 25.5606 | 24.7936 | 25.2903 | 26.3198 | NaN     | 24.3083 | 24.904  | 24.3858 | E7EPN9;Q9Y520-7 | E7EPN9;Q9Y520-7 | Protein PRRC2C             |
|     | 26.9581 | 26.9598 | 27.7803 | 26.1588 | 26.6536 | 27.3079 | 28.8401 | 27.2947 | 28.6218 | 28.1568 | 27.1372 | 26.7907 | O95084;O95084-1 | O95084;O95084-2 | Serine protease 2 PRSS23   |
|     | 22.9823 | NaN     | 22.944  | 22.712  | NaN     | NaN     | NaN     | NaN     | NaN     | 23.5914 | NaN     | NaN     | Q9NRG1;Q9NRG1   | Q9NRG1;Q9NRG1   | Phosphoribosyltr PRTFDC1   |
|     | 25.7134 | 24.4962 | NaN     | 24.0038 | NaN     | NaN     | 28.0782 | 24.2463 | NaN     | NaN     | NaN     | NaN     | P07602;C9JIZ6;P | P07602;C9JIZ6;P | Prosaposin;Saposi PSAP     |
|     | 27.9086 | 28.0644 | 27.8037 | 27.3372 | 27.821  | 27.5063 | 27.9392 | 27.4277 | 27.1342 | 28.0525 | 28.0374 | 27.7508 | Q9Y617;Q9Y617-1 | Q9Y617;Q9Y617-2 | Phosphoserine an PSAT1     |
| NaN | NaN     | NaN     | NaN     | NaN     | NaN     | 22.8074 | NaN     | NaN     | NaN     | NaN     | NaN     | NaN     | Q9NYI0;E5RI29;Q | Q9NYI0;E5RI29;Q | PH and SEC7 dom PSD3       |
|     | 26.2905 | 25.73   | 26.5159 | 26.3125 | 26.0953 | 27.0888 | 25.5894 | 25.3772 | 25.2825 | 26.4425 | 25.7722 | 26.0468 | P49768;P49768-2 | P49768;P49768-2 | Presenilin-1;Prese PSEN1   |
| NaN | NaN     | NaN     | NaN     | 21.7931 | NaN     | P49810;B1AP22;P | P49810;B1AP22;P | Presenilin-2;Prese PSEN2   |
|     | 26.1583 | NaN     | 25.5453 | 25.9916 | NaN     | NaN     | NaN     | NaN     | NaN     | NaN     | 25.9462 | NaN     | O75475;O75475-1 | O75475;O75475-2 | PC4 and SFRS1-int PSIP1    |
|     | 29.0292 | 30.1928 | 29.6567 | 28.9346 | 30.2527 | 29.5386 | 29.3769 | 30.2421 | 30.1705 | 29.4511 | 29.8701 | 30.0938 | P25786;P25786-2 | P25786;P25786-2 | Proteasome subu PSMA1      |
|     | 28.7741 | 30.0121 | 29.3576 | 28.7058 | 29.874  | 29.2106 | 29.258  | 30.2148 | 30.188  | 28.9658 | 29.413  | 29.9424 | P25787;A0A024R  | P25787;A0A024R  | Proteasome subu PSMA2      |



|         |         |         |         |         |         |         |         |         |         |         |         |                                                                     |                                                    |                   |                   |        |
|---------|---------|---------|---------|---------|---------|---------|---------|---------|---------|---------|---------|---------------------------------------------------------------------|----------------------------------------------------|-------------------|-------------------|--------|
| 28.564  | 29.1626 | 28.9863 | 28.4737 | 28.9714 | 28.9722 | 28.8427 | 29.7659 | 29.7437 | 28.7557 | 29.2997 | 29.617  | P25788;P25788-2;P25788;P25788-2; Proteasome subu                    | PSMA3                                              |                   |                   |        |
| 28.5202 | 28.4966 | 28.3212 | 27.8831 | 27.9799 | 28.3089 | 27.9118 | 28.0541 | 27.9894 | 28.0533 | 28.2624 | 27.5125 | P25789;H0YN18;P25789;H0YN18;P25789;H0YN18;P25789-2; Proteasome subu | PSMA4                                              |                   |                   |        |
| 28.9185 | 29.9811 | 29.557  | 28.991  | 29.7167 | 29.5019 | 29.2379 | 30.0852 | 29.7684 | 29.1585 | 29.61   | 30.0161 | P28066;P28066-2;P28066;P28066-2; Proteasome subu                    | PSMA5                                              |                   |                   |        |
| 28.5816 | 30.0377 | 29.106  | 28.4152 | 29.7782 | 29.0543 | 29.2016 | 29.8102 | 29.7689 | 29.0973 | 29.2667 | 29.7056 | P60900;G3V5Z7;G;P60900;G3V5Z7;G; Proteasome subu                    | PSMA6                                              |                   |                   |        |
| 28.9259 | 30.0227 | 29.275  | 28.8313 | 29.7086 | 29.4147 | 29.2699 | 30.0321 | 29.9618 | 29.051  | 29.515  | 29.722  | O14818;O14818-2;O14818;O14818-2; Proteasome subu                    | PSMA7                                              |                   |                   |        |
| 27.7294 | 28.7167 | 28.2391 | 27.7453 | 28.4329 | 28.2466 | 27.8644 | 28.1053 | 28.4037 | 27.6606 | 27.9322 | 28.3987 | P20618                                                              | P20618                                             | Proteasome subu   | PSMB1             |        |
| 23.506  | 24.7078 | 24.5497 | 23.6989 | 25.5392 | 24.1817 | NaN     | 25.0389 | NaN     | 23.6646 | 24.0831 | NaN     | P40306;J3QQN1                                                       | P40306;J3QQN1                                      | Proteasome subu   | PSMB10            |        |
| 27.9654 | 28.4543 | 28.158  | 27.7233 | 28.4109 | 28.0935 | 28.121  | 28.1612 | 28.165  | 28.1036 | 28.2105 | 28.4247 | P49721;A0A087W                                                      | P49721                                             | Proteasome subu   | PSMB2             |        |
| 27.2806 | 28.1338 | 27.69   | 27.2316 | 27.8293 | 27.5333 | 27.3264 | 27.9934 | 27.8718 | 26.973  | 27.4739 | 27.8011 | P49720;A0A087W                                                      | P49720;A0A087W                                     | Proteasome subu   | PSMB3             |        |
| 28.4016 | 29.2481 | 28.6246 | 28.0529 | 28.9166 | 28.4956 | 28.6154 | 28.9068 | 28.7698 | 28.1739 | 28.5855 | 28.8261 | P28070                                                              | P28070                                             | Proteasome subu   | PSMB4             |        |
| 28.7369 | 29.5467 | 29.0886 | 28.4476 | 29.2734 | 28.9331 | 28.8944 | 29.6749 | 29.5438 | 28.9068 | 29.2874 | 29.4718 | P28074;P28074-3;P28074;P28074-3; Proteasome subu                    | PSMB5                                              |                   |                   |        |
| 28.2823 | 29.5829 | 28.8629 | 28.1769 | 29.3465 | 28.8461 | 28.9344 | 29.8633 | 29.527  | 28.8289 | 29.2936 | 28.9975 | P28072;J3L3X7;AC                                                    | P28072                                             | Proteasome subu   | PSMB6             |        |
| 27.8508 | 28.1893 | 27.3654 | 27.28   | 27.813  | 27.3736 | 27.5907 | 27.4383 | 27.339  | 27.4953 | 27.9023 | 26.8313 | Q99436;Q5TBG5;I                                                     | Q99436                                             | Proteasome subu   | PSMB7             |        |
| 25.0494 | 27.0715 | 26.1074 | 24.6939 | 26.9465 | 25.4847 | 26.341  | 26.9335 | 26.7843 | 23.8862 | 24.4805 | 26.6637 | P28062;P28062-2;P28062;P28062-2; Proteasome subu                    | PSMB8;PSM8                                         |                   |                   |        |
| 24.8572 | 26.4306 | 25.6387 | 24.6159 | 26.5136 | 25.7116 | 24.9961 | 25.7734 | 25.4678 | 24.3147 | 24.7448 | 24.8685 | P28065;A2ACR1;P                                                     | P28065;A2ACR1;P                                    | Proteasome subu   | PSMB9             |        |
| 30.224  | 30.1884 | 30.072  | 30.273  | 30.3398 | 30.1285 | 29.486  | 29.9418 | 29.3309 | 29.9747 | 30.0324 | 29.6463 | P62191;P62191-2;P62191;P62191-2; 26S protease regu                  | PSMC1                                              |                   |                   |        |
| 30.9307 | 30.3617 | 30.3375 | 30.9401 | 30.577  | 30.4976 | 29.6232 | 30.2662 | 29.7389 | 30.4667 | 30.3366 | 29.8208 | P35998;P35998-2;P35998;P35998-2; 26S protease regu                  | PSMC2                                              |                   |                   |        |
| 30.659  | 30.2107 | 30.0437 | 30.447  | 30.238  | 30.03   | 29.6119 | 30.187  | 29.5134 | 29.9739 | 30.0103 | 29.6842 | P17980;R4GNH3;I                                                     | P17980;R4GNH3;I                                    | 26S protease regu | PSMC3             |        |
| 30.3119 | 30.1407 | 29.9568 | 30.4451 | 30.3353 | 30.1244 | 29.4319 | 30.3929 | 29.6869 | 30.3174 | 30.4335 | 29.8845 | P43686;P43686-2;P43686;P43686-2; 26S protease regu                  | PSMC4                                              |                   |                   |        |
| 30.1831 | 30.2144 | 30.0526 | 30.6663 | 30.424  | 30.126  | 29.4621 | 30.2527 | 29.6617 | 30.1084 | 30.1747 | 29.802  | P62195;J3QQM1;I                                                     | P62195;J3QQM1;I                                    | 26S protease regu | PSMC5             |        |
| NaN     | NaN     | NaN     | NaN     | 22.2363 | NaN                                                                 | P62195-2;J3QSA9                                    | P62195-2;J3QSA9   | 26S protease regu | PSMC5  |
| 30.8737 | 30.5019 | 30.5033 | 30.9424 | 30.5543 | 30.7078 | 29.9474 | 30.4787 | 30.0405 | 30.8706 | 30.4973 | 30.0921 | P62333;A0A087X;P                                                    | P62333;A0A087X;P                                   | 26S protease regu | PSMC6             |        |
| 30.6258 | 29.2093 | 29.9222 | 30.6218 | 29.524  | 30.0947 | 29.0937 | 29.421  | 28.8351 | 30.262  | 30.1562 | 29.2169 | Q99460;A0A087W                                                      | Q99460;A0A087W                                     | 26S proteasome n  | PSMD1             |        |
| 24.2336 | 24.1259 | 24.5806 | 24.1359 | 24.3569 | 24.7543 | 24.2141 | NaN     | 24.1384 | 24.4588 | 25.1234 | NaN     | O75832;B1AIY7;B                                                     | O75832;B1AIY7;B                                    | 26S proteasome n  | PSMD10            |        |
| 30.9568 | 30.6233 | 30.8454 | 31.3106 | 31.0646 | 31.1034 | 29.7996 | 30.5913 | 30.2048 | 30.7437 | 30.8516 | 30.4411 | O00231;O00231-2;O00231;O00231-2; 26S proteasome n                   | PSMD11                                             |                   |                   |        |
| 30.0946 | 29.2816 | 29.4928 | 30.2421 | 29.4618 | 29.6983 | 28.811  | 29.2829 | 28.7761 | 29.6069 | 29.456  | 29.0546 | O00232;O00232-2;O00232;O00232-2; 26S proteasome n                   | PSMD12                                             |                   |                   |        |
| 30.0022 | 28.9644 | 29.3954 | 30.0488 | 29.4422 | 29.5813 | 28.486  | 29.2183 | 28.8112 | 29.3968 | 29.5316 | 28.9738 | Q9UNM6;Q9UNN                                                        | Q9UNM6;Q9UNN                                       | 26S proteasome n  | PSMD13            |        |
| 29.4065 | 29.4415 | 29.2741 | 29.6168 | 29.5846 | 29.4452 | 28.7216 | 29.3883 | 28.8386 | 29.5909 | 29.8027 | 29.045  | O00487;C9JW37                                                       | O00487                                             | 26S proteasome n  | PSMD14            |        |
| 31.7794 | 30.5308 | 31.2447 | 31.6697 | 30.821  | 31.3217 | 30.5258 | 30.7927 | 29.7384 | 31.0333 | 30.9799 | 30.0918 | Q13200;Q13200-2;Q13200;Q13200-2; 26S proteasome n                   | PSMD2                                              |                   |                   |        |
| 30.4766 | 29.2097 | 29.8852 | 30.6964 | 29.6377 | 29.947  | 29.3707 | 29.2598 | 29.3659 | 30.1036 | 29.8705 | 29.2565 | O43242;O43242-2;O43242;O43242-2; 26S proteasome n                   | PSMD3                                              |                   |                   |        |
| 28.0578 | 27.7651 | 27.3295 | 27.8544 | 27.4201 | 27.5765 | 26.4645 | 27.109  | 26.0918 | 27.0843 | 27.3922 | 26.7363 | P55036;Q5VWC4;P                                                     | P55036;Q5VWC4;P                                    | 26S proteasome n  | PSMD4             |        |
| 27.088  | 26.4011 | 26.7724 | 26.8485 | 26.1474 | 26.6053 | 26.9106 | 25.5329 | 25.7536 | 26.7833 | 26.3909 | 26.1431 | Q16401;Q16401-2;Q16401;Q16401-2; 26S proteasome n                   | PSMD5                                              |                   |                   |        |
| 29.8137 | 29.0625 | 29.3009 | 29.8068 | 29.3385 | 29.4178 | 28.7122 | 29.1428 | 28.6599 | 29.571  | 29.599  | 28.8537 | Q15008;Q15008-4;Q15008;Q15008-4; 26S proteasome n                   | PSMD6                                              |                   |                   |        |
| 29.4983 | 28.3921 | 29.1241 | 29.6346 | 28.9826 | 29.3211 | 28.417  | 28.5311 | 28.2672 | 28.992  | 29.3065 | 28.0322 | P51665;H3BNT7;P                                                     | P51665;H3BNT7;P                                    | 26S proteasome n  | PSMD7             |        |
| 29.2493 | 28.1728 | 28.4619 | 29.4069 | 28.5152 | 28.6366 | 27.3981 | 27.6589 | 27.3616 | 28.6114 | 28.6624 | 27.6103 | P48556;R4GMR5;P                                                     | P48556;R4GMR5;P                                    | 26S proteasome n  | PSMD8             |        |
| 28.0738 | 28.2885 | 28.0465 | 27.8908 | 28.0061 | 27.9009 | 28.1899 | 28.4587 | 27.4573 | 28.468  | 28.4178 | 27.9494 | O00233;J3KN29;F                                                     | O00233;J3KN29;F                                    | 26S proteasome n  | PSMD9             |        |
| 28.3399 | 29.4266 | 29.2207 | 28.4465 | 29.0918 | 29.2277 | 28.925  | 28.4904 | 28.3348 | 28.7569 | 28.7264 | 28.5347 | Q06323;Q06323-2;Q06323;Q06323-2; Proteasome activ                   | PSME1                                              |                   |                   |        |
| 28.9959 | 30.1571 | 29.8178 | 28.951  | 29.9413 | 29.7885 | 29.4391 | 29.7833 | 29.7537 | 29.253  | 29.4989 | 29.778  | Q9UL46;A0A087X                                                      | Q9UL46;A0A087X                                     | Proteasome activ  | PSME2             |        |
| 26.9614 | 26.9328 | 26.5888 | 27.1896 | 27.3787 | 26.7519 | 23.8359 | 26.2915 | 26.2025 | 26.6546 | 27.3361 | 27.2482 | P61289;P61289-2;P61289;P61289-2; Proteasome activ                   | PSME3                                              |                   |                   |        |
| 27.3617 | 25.8437 | 26.6598 | 27.4474 | 26.2929 | 26.9265 | 26.0337 | NaN     | 25.4365 | 26.285  | 26.2824 | 25.8901 | Q14997;Q14997-2;Q14997;Q14997-2; Proteasome activ                   | PSME4                                              |                   |                   |        |
| 23.3515 | NaN     | 22.4706 | 23.0466 | 23.6306 | NaN     | 23.3573 | NaN     | NaN     | 23.2225 | NaN     | 23.6516 | Q92530;Q5QPM7                                                       | Q92530;Q5QPM7                                      | Proteasome inhib  | PSMF1             |        |
| 24.8387 | 24.4579 | 24.3055 | 24.3665 | 24.673  | 24.2213 | NaN     | NaN     | NaN     | 25.0014 | 24.578  | 25.3252 | 25.4664                                                             | O95456;O95456-2;O95456;O95456-2; Proteasome asser  | PSMG1             |                   |        |
| 24.4908 | 23.7994 | 24.4188 | 24.7999 | 24.6138 | NaN     | 23.9492 | 24.1485 | 24.2868 | 24.5048 | 24.3542 | 24.1427 | Q969U7;Q969U7-2;Q969U7;Q969U7-2; Proteasome asser                   | PSMG2                                              |                   |                   |        |
| 23.3941 | 23.2478 | 22.9153 | 23.3059 | 23.4034 | 23.1975 | NaN                                                                 | Q9BT73                                             | Q9BT73            | Proteasome asser  | PSMG3  |
| NaN     | NaN     | NaN     | 22.6673 | 22.2424 | 22.7383 | 22.7058 | NaN     | NaN     | NaN     | 22.6538 | 23.1904 | NaN                                                                 | Q5J554;Q5J554-2;Q5J554;Q5J554-2; Proteasome asser  | PSMG4             |                   |        |
| 27.0344 | 27.0107 | 27.1758 | 27.2033 | 27.4679 | 27.2752 | 26.6761 | 27.39   | 27.1554 | 27.5741 | 27.8269 | 27.969  | Q8WXF1;Q8WXF1;Q8WXF1;Q8WXF1; Paraspeckle comp                       | PSPC1                                              |                   |                   |        |
| 24.8661 | 25.1972 | 24.9831 | 23.7409 | 24.3268 | 24.6247 | 25.1858 | NaN     | 24.3359 | 25.0579 | 24.717  | 24.7187 | P78330;C9JBI3;C9                                                    | P78330;C9JBI3                                      | Phosphoserine ph  | PSPH              |        |
| 29.3188 | 28.6481 | 28.5353 | 28.8233 | 28.5795 | 28.7105 | 28.387  | 28.3003 | 27.9953 | 29.2347 | 29.111  | 28.8265 | P26599;P26599-2;P26599;P26599-2; Polypyrimidine trc                 | PTBP1                                              |                   |                   |        |
| 24.9252 | 24.826  | 24.142  | 24.9309 | 24.5236 | NaN     | NaN     | NaN     | NaN     | 23.9681 | 24.08   | NaN     | O95758;O95758-2;O95758;O95758-2; Polypyrimidine trc                 | PTBP3                                              |                   |                   |        |
| 22.4594 | NaN     | 22.4313 | 23.5563 | 22.4593 | 22.374  | NaN                                                                 | Q96EY7;Q96EY7-2;Q96EY7;Q96EY7-2; Pentatricopeptide | PTCD3             |                   |        |
| NaN     | NaN     | NaN     | NaN     | 20.8293 | NaN                                                                 | P48651;P48651-3;P48651;P48651-3; Phosphatidylserin | PTDSS1            |                   |        |
| NaN     | NaN     | NaN     | NaN     | 22.4901 | NaN                                                                 | Q9BVG9;E9PS47;E                                    | Q9BVG9;E9PS47;E   | Phosphatidylserin | PTDSS2 |
| 22.6444 | NaN     | 22.8145 | 22.5008 | NaN     | NaN     | NaN     | NaN     | NaN     | NaN     | 22.6164 | NaN     | NaN                                                                 | P60484;A0A0U1R                                     | P60484;A0A0U1R    | Phosphatidylinosi | PTEN   |
| 22.3764 | NaN     | 22.3214 | 21.9927 | 22.5899 | NaN     | NaN     | 22.6684 | NaN     | 24.0266 | 24.4432 | 22.9583 | Q96BW5;Q96BW5;Q96BW5;Q96BW5; Phosphotriesterat                      | PTER                                               |                   |                   |        |
| 24.6993 | 24.8504 | 24.5737 | 24.947  | 24.9732 | 24.2255 | 24.1931 | NaN     | NaN     | 24.9591 | 25.3618 | 25.1506 | Q9H7Z7;A6NHH0;Q9H7Z7;A6NHH0; Prostaglandin E sy                     | PTGES2                                             |                   |                   |        |
| 29.0526 | 27.882  | 28.2185 | 28.5592 | 28.3156 | 27.8935 | 28.8817 | 29.2    |         |         |         |         |                                                                     |                                                    |                   |                   |        |



|     |         |         |         |         |         |         |         |         |         |         |         |         |         |                      |                      |                     |                    |                    |                    |                    |        |
|-----|---------|---------|---------|---------|---------|---------|---------|---------|---------|---------|---------|---------|---------|----------------------|----------------------|---------------------|--------------------|--------------------|--------------------|--------------------|--------|
|     | 25.4079 | 25.2239 | 25.8447 | 25.2257 | 24.9043 | 25.5624 | 25.85   | 24.2198 | NaN     |         | 25.7282 | 25.1936 | 25.0157 | Q05397;Q05397-5      | Q05397;Q05397-5      | Focal adhesion kir  | PTK2               |                    |                    |                    |        |
|     | 27.9072 | 28.8464 | 28.9592 | 27.9636 | 28.5252 | 28.9737 | 29.0416 | 28.0167 |         | 28.5268 | 29.2077 | 28.421  | 28.2434 | Q13308;Q13308-6      | Q13308;Q13308-6      | Inactive tyrosine-γ | PTK7               |                    |                    |                    |        |
|     | 27.0709 | 27.0285 | 27.7193 | 26.4159 | 27.3348 | 27.507  | 25.9922 | 28.3896 |         | 27.9376 | 27.3763 | 28.2208 | 29.9517 | P06454;P06454-2      | P06454;P06454-2      | Prothymosin alph    | PTMA               |                    |                    |                    |        |
|     | 25.9613 | NaN     |         | 25.9935 | 25.6068 | 25.8217 | 26.362  | NaN     |         | 25.6958 | NaN     | 27.2365 | 27.3752 | P20962;F5H7R9;F      | P20962;F5H7R9;F      | Parathymosin        | PTMS               |                    |                    |                    |        |
|     | 23.3785 | NaN     |         | 23.4822 | 23.4083 | NaN     |         | NaN     |         | NaN     |         | 23.8083 | 23.5964 | NaN                  | Q93096;A0A0D9S       | Q93096;A0A0D9S      | Protein tyrosine p | PTP4A1             |                    |                    |        |
|     | 24.3817 | 23.974  | 24.4922 | 24.1145 | 24.0015 | 24.5147 | 24.5908 | NaN     |         | NaN     |         | 24.9619 | 24.5405 | NaN                  | Q12974;Q12974-4      | Q12974;Q12974-4     | Protein tyrosine p | PTP4A2             |                    |                    |        |
|     | 27.5595 | 27.198  | 27.0427 | 26.9367 | 27.2514 | 27.0543 | 27.0904 |         | 27.5454 | 27.884  | 27.8934 | 27.679  | 27.069  | P18031;B4DSN5        | P18031;B4DSN5        | Tyrosine-protein γ  | PTPN1              |                    |                    |                    |        |
|     | 27.0583 | 27.7297 | 27.6186 | 27.0104 | 27.6091 | 27.5288 | 28.021  | 27.7858 |         | 28.071  | 27.6346 | 27.7834 | 27.9569 | Q06124;Q06124-2      | Q06124;Q06124-2      | Tyrosine-protein γ  | PTPN11             |                    |                    |                    |        |
|     | 24.4975 | NaN     |         | 23.3133 | 23.8159 | 23.3309 | NaN     |         | 23.8211 | NaN     |         | NaN     | 23.3231 | NaN                  |                      | NaN                 | Q05209;Q05209-1    | Q05209;Q05209-1    | Tyrosine-protein γ | PTPN12             |        |
| NaN |         | NaN     |         | NaN     | NaN     |                      |                      |                     | 25.3793            | Q12923;Q12923-3    | Q12923;Q12923-3    | Tyrosine-protein γ | PTPN13 |
|     | 25.5963 | 25.7837 | 26.9889 | 25.8405 | 26.0266 | 26.9693 | 26.3814 | 23.9791 |         | 25.7243 | 27.1007 | 26.7844 | 26.4173 | Q15678;E2J9M0        | Q15678               |                     | Tyrosine-protein γ | PTPN14             |                    |                    |        |
|     | 25.9542 | 25.5206 | 25.538  | 25.7854 | 25.3161 | 25.3144 | 25.3483 | 25.6689 |         | 25.5495 | 26.2468 | 26.5851 | 25.4585 | P17706;P17706-2      | P17706;P17706-2      |                     | Tyrosine-protein γ | PTPN2              |                    |                    |        |
|     | 26.4021 | 26.2564 | 25.8158 | 25.7539 | 25.5728 | 25.3554 | 25.8529 | 26.0393 |         | 26.7459 | 25.6443 | 25.5814 | 26.1513 | Q9H3S7;R4GMM;Q9H3S7  |                      |                     | Tyrosine-protein γ | PTPN23             |                    |                    |        |
| NaN |         | NaN     |         | NaN     | NaN     |                      |                      |                     |                    | P43378;A0A0A0V     | P43378;A0A0A0V     | Tyrosine-protein γ | PTPN9  |
|     | 26.6828 | 26.389  | 27.3773 | 26.7268 | 26.3142 | 27.5263 | 26.9539 | 26.3824 |         | 26.8025 | 27.9745 | 27.3531 | 27.1867 | P18433;P18433-2      | P18433;P18433-2      |                     | Receptor-type tyr  | PTPRA              |                    |                    |        |
|     | 26.4748 | 26.51   | 27.2072 | 26.5575 | 26.6734 | 27.2717 | 27.2167 | 27.0911 |         | 27.675  | 27.9596 | 27.7354 | 27.5687 | P23469;P23469-2      | P23469;P23469-2      |                     | Receptor-type tyr  | PTPRE              |                    |                    |        |
|     | 25.1513 | 25.3169 | 25.3798 | 24.7991 | 24.9286 | 25.4411 | 25.4121 | 24.7907 |         | 25.6102 | 25.3537 | 24.9838 | 25.1308 | P10586;P10586-2      | P10586;P10586-2      |                     | Receptor-type tyr  | PTPRF              |                    |                    |        |
|     | 26.0926 | 25.4589 | 26.2946 | 26.0052 | 25.0595 | 26.4126 | 26.1306 | 25.6734 |         | 25.8925 | 27.3091 | 26.5291 | 26.5282 | P23470;A0A087W       | P23470;A0A087W       |                     | Receptor-type tyr  | PTPRG              |                    |                    |        |
|     | 26.8333 | 26.7667 | 27.5921 | 26.6572 | 26.8072 | 27.7745 | 25.9145 | 23.9686 |         | 25.5029 | 26.9113 | 25.684  | 26.0845 | Q12913;A0A087W       | Q12913;A0A087W       |                     | Receptor-type tyr  | PTPRJ              |                    |                    |        |
|     | 23.8755 | 23.9996 | 24.8841 | 24.1703 | 23.6609 | 24.9743 | 24.4412 | 24.4128 | NaN     |         | 24.6888 | 24.4025 | 24.2095 | Q5TG12;E9PGC5;Q5TG12 | E9PGC5;Q5TG12        |                     | Protein-tyrosine-γ | PTPRK              |                    |                    |        |
|     | 24.6883 | 24.8577 | 25.374  | 24.6961 | 24.5548 | 25.572  | 24.9981 | NaN     |         | 25.0917 | 25.1202 | 24.6627 | NaN     | P28827;E7EPS8;P      | P28827;E7EPS8;P      |                     | Receptor-type tyr  | PTPRM              |                    |                    |        |
| NaN |         | 22.5318 | NaN     |         | NaN     |         | NaN     |         | NaN     |         | 25.1495 | NaN     |         | NaN                  |                      |                     |                    | Q13332;Q13332-6    | Q13332;Q13332-6    | Receptor-type tyr  | PTPRS  |
|     | 30.0213 | 29.3945 | 29.625  | 29.8494 | 29.0247 | 29.6155 | 29.2228 | 29.9574 |         | 28.7929 | 29.0942 | 28.7478 | 28.5349 | Q6NZ12;Q6NZ12-2      | Q6NZ12;Q6NZ12-2      |                     | Polymerase I and   | PTRF               |                    |                    |        |
|     | 25.8772 | 25.2372 | 25.1694 | 25.6402 | 25.1118 | 24.7827 | 25.1014 | 24.53   |         | 25.192  | 24.7528 | 24.0063 | 24.2121 | Q9Y3E5;J3KQ48        | Q9Y3E5;J3KQ48        |                     | Peptidyl-tRNA hyc  | PTRH2              |                    |                    |        |
|     | 23.8006 | 24.5797 | 23.7604 | 23.8107 | 24.6051 | 23.0893 | 24.4723 | 24.3892 | NaN     |         | 23.9421 | 24.0754 | NaN     | Q6GMV3               | Q6GMV3               |                     | Putative peptidyl- | PTRHD1             |                    |                    |        |
|     | 25.6785 | 26.0933 | 26.3965 | 25.7087 | 25.7091 | 26.4251 | 25.514  | 25.6257 |         | 26.738  |         | 25.8    | 25.9933 | P53801;A8MXQ1;P53801 | A8MXQ1;P53801        |                     | Pituitary tumor-tr | PTTG1IP            |                    |                    |        |
|     | 26.5264 | 27.2126 | 26.163  | 26.3805 | 26.8385 | 25.9144 | 29.6432 | 29.1095 |         | 28.139  | 27.4546 | 26.9734 | 26.9906 | P26022               | P26022               |                     | Pentraxin-related  | PTX3               |                    |                    |        |
|     | 26.4533 | 25.625  | 26.2044 | 26.8993 | 26.0412 | 26.2349 | 24.5183 | 24.0729 |         | 24.2528 | 25.7574 | 26.0081 | 25.9902 | Q9UHX1-6;A0A0J       | Q9UHX1-6;A0A0J       |                     | Poly(U)-binding-sγ | PUF60              |                    |                    |        |
|     | 25.3698 | 24.6571 | 24.7065 | 24.8381 | 24.1968 | 24.0938 | 23.9509 | 25.1462 |         | 23.8446 | 23.6665 | 24.1909 | NaN     | Q14671-2;Q5T1Z4      | Q14671-2;Q5T1Z4      |                     | Pumilio homolog    | PUM1               |                    |                    |        |
|     | 22.4533 | NaN     |         | 21.6534 | NaN     |                      | Q8TB72;Q8TB72-4      | Q8TB72;Q8TB72-4     |                    | Pumilio homolog    | PUM2               |                    |        |
|     | 28.4834 | 28.5091 | 28.3452 | 28.7298 | 28.8294 | 28.3685 | 27.7912 | 29.0397 |         | 28.616  | 28.1463 | 28.57   | 28.7203 | Q00577               | Q00577               |                     | Transcriptional ac | PURA               |                    |                    |        |
|     | 26.9004 | 26.4722 | 26.5507 | 26.8157 | 26.6791 | 26.7313 | 26.5149 | 26.8843 |         | 27.0478 | 26.5968 | 26.9126 | 26.9369 | Q96QR8;Q9UJV8;Q96QR8 |                      |                     | Transcriptional ac | PURB               |                    |                    |        |
|     | 23.4136 | 22.4756 | 22.7161 | 23.1607 | 22.8802 | 22.6158 | NaN     |         | NaN     |         | 22.9763 | 22.8744 | 22.7822 | Q9Y606;F5H1S9;G      | Q9Y606;F5H1S9;G      |                     | tRNA pseudouridil  | PUS1               |                    |                    |        |
|     | 23.192  | NaN     |         | 22.8667 | 22.9858 | NaN     | 23.0872 | NaN     |         | NaN     |         | 23.0581 | 22.9776 | NaN                  | Q96PZ0;E7EUH7;Q96PZ0 | E7EUH7;Q96PZ0       |                    | Pseudouridylate s  | PUS7               |                    |        |
| NaN |         | NaN     |         | 21.3439 | 22.3279 | NaN     |         | NaN     |         | NaN     |         | NaN     |         | NaN                  |                      |                     |                    | Q8NOZ8;J3KTG4;C    | Q8NOZ8;J3KTG4;C    | tRNA pseudouridil  | PUS11  |
|     | 28.5464 | 28.2615 | 28.7674 | 28.6177 | 27.9003 | 28.4731 | 29.4186 | 28.7955 |         | 28.7031 | 29.0498 | 28.4871 | 28.5248 | P15151;A0A0C4D       | P15151;A0A0C4D       |                     | Poliovirus recepto | PVR                |                    |                    |        |
|     | 23.6677 | 23.44   | 24.4042 | 23.6454 | 23.5085 | 23.9491 | NaN     |         | NaN     |         | NaN     |         | 23.4901 | Q92692               | Q92692               |                     | Nectin-2           | PVRL2              |                    |                    |        |
|     | 26.6331 | 26.4831 | 26.9788 | 26.6439 | 26.4831 | 27.108  | 27.6298 | 26.8919 |         | 26.757  | 27.8672 | 27.0822 | 26.8418 | Q92692-2;K7EKE8      | Q92692-2             |                     | Nectin-2           | PVRL2              |                    |                    |        |
| NaN |         | NaN     |         | 23.3708 | NaN     |                      | NaN                  |                     |                    | Q9NQ53;Q9NQ53      | Q9NQ53;Q9NQ53      | Nectin-3           | PVRL3  |
|     | 26.0532 | 24.8129 | 25.3662 | 26.1354 | 25.4448 | 25.3031 | 23.5782 | 25.9407 | NaN     |         | 23.7531 | 25.2091 | 24.1837 | Q13610;B4DJV5;C      | Q13610;B4DJV5        |                     | Periodic tryptoph; | PWP1               |                    |                    |        |
|     | 25.1193 | 23.5837 | 24.7125 | 26.4497 | 25.0477 | 24.538  | 22.5338 | NaN     |         | NaN     |         | 25.0596 | 25.3016 | NaN                  | Q15269;A0A0B4J       | Q15269;A0A0B4J      |                    | Periodic tryptoph; | PWP2               |                    |        |
|     | 28.8649 | 28.7632 | 28.3444 | 27.8795 | 28.4678 | 28.0466 | 30.1399 | 29.1356 |         | 30.0584 | 29.5615 | 28.8115 | 28.3852 | Q92626;H7C1W1;Q92626 |                      |                     | Peroxisidasin homo | PXDN               |                    |                    |        |
|     | 25.7276 | 25.4175 | 24.8858 | 24.3687 | 25.258  | 25.0825 | 25.11   | NaN     |         | 24.7927 | 23.9668 | 24.1508 | 25.0154 | P49023;F5GZ78;P      | P49023;F5GZ78;P      |                     | Paxillin           | PXN                |                    |                    |        |
|     | 24.7144 | 25.2575 | 23.7436 | 25.1252 | 25.0913 | 24.572  | 23.6823 | NaN     |         | 25.3201 | 22.909  | 23.9856 | 24.4583 | P32322;P32322-3      | P32322;P32322-3      |                     | Pyrroline-5-carbox | PYCR1              |                    |                    |        |
|     | 25.8353 | 25.4103 | 25.3076 | 26.0354 | 25.8102 | 25.3007 | NaN     |         | 24.5339 | 25.1785 | 23.5991 | 24.4855 | NaN     | Q96C36;A0A087W       | Q96C36;A0A087W       |                     | Pyrroline-5-carbox | PYCR2              |                    |                    |        |
|     | 25.8239 | 25.5416 | 25.5535 | 25.9569 | 26.0858 | 25.7403 | 25.2002 | 25.8906 | NaN     |         | 25.4761 | 25.8457 | 25.9194 | Q53H96;Q53H96        | Q53H96;Q53H96        |                     | Pyrroline-5-carbox | PYCR1              |                    |                    |        |
|     | 29.8965 | 29.3917 | 29.5628 | 29.4249 | 29.3332 | 29.4885 | 30.0132 | 29.7582 |         | 30.0483 | 30.5253 | 30.2384 | 30.1034 | P11216;H0Y4Z6        | P11216               |                     | Glycogen phosph    | PYGB               |                    |                    |        |
|     | 29.6145 | 29.211  | 29.301  | 29.1917 | 28.999  | 29.1757 | 28.6147 | 28.6566 |         | 29.2566 | 28.9424 |         | 28.7127 | P06737;P06737-2      | P06737;P06737-2      |                     | Glycogen phosph    | PYGL               |                    |                    |        |
|     | 29.4712 | 28.8914 | 28.9924 | 29.4962 | 29.3088 | 29.17   | 28.9067 | 28.9233 |         | 29.0801 | 29.3877 | 29.4425 | 29.3366 | P47897;P47897-2      | P47897;P47897-2      |                     | Glutamine-tRNA     | QARS               |                    |                    |        |
|     | 24.5859 | 24.8248 | 24.3619 | 24.0869 | 24.8011 | 24.2585 | 24.357  | 25.3241 |         | 25.3631 | 25.0524 | 25.681  | 25.824  | P09417;P09417-2      | P09417;P09417-2      |                     | Dihydropteridine γ | QDPR               |                    |                    |        |
| NaN |         | NaN     |         | 23.1206 | NaN     |                      | Q5XKP0               | Q5XKP0              |                    | Protein QIL1       | QIL1               |                    |        |
|     | 26.1698 | 25.8639 | 25.1861 | 24.9506 | 25.1721 | 24.6082 | NaN     |         | NaN     |         | NaN     |         | 23.699  | NaN                  |                      |                     |                    | Q96PU8;Q96PU8      | Q96PU8;Q96PU8      | Protein quaking    | QKI    |
|     | 25.4244 |         |         |         |         |         |         |         |         |         |         |         |         |                      |                      |                     |                    |                    |                    |                    |        |



|         |         |         |         |         |         |         |         |         |         |         |         |                             |                  |                    |                 |
|---------|---------|---------|---------|---------|---------|---------|---------|---------|---------|---------|---------|-----------------------------|------------------|--------------------|-----------------|
| 25.5262 | 25.3722 | 25.9482 | 25.223  | 25.3771 | 25.4191 | 24.4598 | NaN     | 23.9649 | 24.7245 | 24.6302 | NaN     | Q6WKZ4;Q6WKZ4               | Q6WKZ4;Q6WKZ4    | Rab11 family-inte  | RAB11F1P1       |
| 25.7229 | 26.2673 | 26.4747 | 25.4516 | 26.2142 | 25.8539 | 23.7939 | 24.6723 | 24.9637 | 25.308  | 25.2958 | 25.5074 | Q9BXF6                      | Q9BXF6           | Rab11 family-inte  | RAB11F1P5       |
| 26.0393 | 25.4325 | 25.8784 | 25.6916 | 25.3489 | 25.7425 | 25.9315 | 25.3195 | 25.2959 | 25.5748 | 25.1733 | 25.7314 | Q6IQ22                      | Q6IQ22           | Ras-related protei | RAB12           |
| 28.3217 | 28.7947 | 29.3047 | 28.5762 | 29.085  | 29.3137 | 28.4492 | 28.1063 | 28.9297 | 29.1837 | 29.2147 | 29.1003 | P51153;A0A087W              | P51153           | Ras-related protei | RAB13           |
| 28.6795 | 28.7403 | 28.9066 | 28.5467 | 28.6293 | 28.8446 | 28.448  | 28.159  | 28.7242 | 29.0557 | 29.149  | 28.7852 | P61106;X6RFL8               | P61106;X6RFL8    | Ras-related protei | RAB14           |
| 27.1749 | 26.8671 | 27.1646 | 26.9892 | 26.8788 | 27.1064 | 27.4134 | 27.2619 | 27.2575 | 27.4339 | 27.2372 | 27.1408 | Q9NP72;A0A087X              | Q9NP72;A0A087X   | Ras-related protei | RAB18           |
| 30.9666 | 30.4497 | 30.7182 | 30.3518 | 30.4013 | 30.5637 | 30.9993 | 30.8654 | 30.9814 | 30.4403 | 30.3316 | 30.8154 | P62820;E7END7;P             | P62820;E7END7;P  | Ras-related protei | RAB1A           |
| 29.3743 | 29.3621 | 29.8378 | 29.4322 | 29.0198 | 29.4404 | 30.3934 | 29.774  | 29.7887 | 30.2034 | 29.6578 | 29.7016 | Q9H0U4;E9PLD0;Q9H0U4;E9PLD0 | Q9H0U4;E9PLD0    | Ras-related protei | RAB1B           |
| 22.1902 | NaN     | 21.573  | NaN     | Q9NX57                      | Q9NX57           | Ras-related protei | RAB20           |
| 27.9259 | 27.5722 | 27.9775 | 27.8336 | 27.1895 | 27.8803 | 28.2318 | 27.2304 | 27.4975 | 28.1772 | 27.8604 | 27.3097 | Q9UL25                      | Q9UL25           | Ras-related protei | RAB21           |
| 25.9657 | 25.8805 | 26.4067 | 25.5901 | 25.6364 | 26.2111 | 26.3247 | 26.575  | 27.199  | 26.0124 | 25.8809 | 27.0417 | Q9UL26                      | Q9UL26           | Ras-related protei | RAB22A          |
| 27.2704 | 27.2504 | 27.4837 | 27.0024 | 27.0964 | 27.5281 | 27.5751 | 27      | 27.3134 | 28.2577 | 27.8912 | 27.8221 | Q9ULC3                      | Q9ULC3           | Ras-related protei | RAB23           |
| 23.3232 | 22.2153 | 22.9988 | 22.8312 | 22.8267 | 22.4882 | NaN     | NaN     | NaN     | NaN     | 22.7997 | NaN     | Q969Q5;D6RFW3               | Q969Q5;D6RFW3    | Ras-related protei | RAB24           |
| 25.2899 | 25.4922 | 25.4181 | 25.1812 | 25.136  | 25.1193 | 25.2284 | NaN     | 24.6916 | 25.3315 | 24.8551 | 25.2443 | P51159;H3BN55;†             | P51159;H3BN55;†  | Ras-related protei | RAB27A          |
| 21.629  | 21.9372 | 22.192  | 21.9455 | 21.6014 | NaN     | 22.8838 | NaN     | 21.9359 | 22.5076 | 21.904  | NaN     | O00194;K7E541               | O00194;K7E541    | Ras-related protei | RAB27B          |
| 24.2498 | NaN     | 24.0396 | 24.3331 | NaN     | 24.1465 | 24.7683 | NaN     | NaN     | NaN     | NaN     | NaN     | O14966;O14966-2             | O14966           | Ras-related protei | RAB29           |
| 28.5295 | 28.1404 | 28.7164 | 28.5328 | 27.9446 | 28.5915 | 28.6269 | 28.0346 | 28.2373 | 28.6578 | 28.28   | 28.1452 | P61019;P61019-2             | P61019;P61019-2  | Ras-related protei | RAB2A           |
| 22.7122 | NaN     | NaN     | 22.6818 | NaN     | NaN     | NaN     | NaN     | NaN     | 22.8188 | NaN     | NaN     | Q8WUD1;Q5HYI5               | Q8WUD1;Q5HYI5    | Ras-related protei | RAB2B;DKFZp313C |
| 21.5817 | NaN     | 21.3702 | 21.2307 | NaN     | NaN     | NaN     | NaN     | NaN     | 22.1052 | NaN     | NaN     | Q15771;E9PRF7;E             | Q15771;E9PRF7;E  | Ras-related protei | RAB30           |
| 23.7856 | 24.1368 | 24.5855 | 24.0161 | 24.1119 | 24.7162 | 24.2401 | 25.2192 | 25.147  | 24.4036 | 24.3867 | 24.7673 | Q13636;J3QR51               | Q13636;J3QR51    | Ras-related protei | RAB31           |
| 25.9723 | 25.0431 | 25.6815 | 25.8534 | 24.8161 | 25.9452 | 25.896  | NaN     | 24.5467 | 26.2132 | 25.5534 | 24.9787 | Q13637                      | Q13637           | Ras-related protei | RAB32           |
| NaN     | NaN     | NaN     | NaN     | NaN     | 21.7357 | NaN     | NaN     | NaN     | NaN     | NaN     | NaN     | Q14088                      | Q14088           | Ras-related protei | RAB33A          |
| 22.9104 | 23.7403 | 23.0828 | NaN     | 22.1847 | NaN     | NaN     | NaN     | 22.9105 | NaN     | 22.1245 | NaN     | P0DI83                      | P0DI83           | Ras-related protei | RAB34           |
| 27.6365 | 27.7413 | 27.9932 | 27.6167 | 27.7216 | 28.1207 | 27.9197 | 27.9469 | 27.4884 | 28.5468 | 28.2322 | 27.826  | Q9BZG1;A8MYQ9               | Q9BZG1;A8MYQ9    | Ras-related protei | RAB34           |
| 29.5213 | 29.446  | 30.2856 | 29.5509 | 29.5992 | 30.4671 | 30.1072 | 29.6859 | 29.6375 | 30.834  | 30.4234 | 30.1788 | Q15286;F5H157;C             | Q15286;F5H157;C  | Ras-related protei | RAB35           |
| 21.5283 | NaN     | 22.1112 | 21.4658 | NaN     | NaN     | NaN     | NaN     | NaN     | 23.045  | 22.3779 | NaN     | P57729;H0YE4A;H             | P57729;H0YE4A    | Ras-related protei | RAB38           |
| 26.1032 | 26.1482 | 26.5623 | 26.4966 | 26.205  | 27.0871 | NaN     | 25.1104 | 26.0668 | 27.2162 | 26.7907 | 26.196  | Q14964                      | Q14964           | Ras-related protei | RAB39A          |
| 26.2467 | 25.863  | 25.7133 | 26.2154 | 25.6548 | 25.6351 | 26.0844 | 26.2759 | 25.4046 | 25.6085 | 25.9374 | 25.3254 | Q15042;Q15042-1             | Q15042;Q15042-1  | Rab3 GTPase-acti   | RAB3GAP1        |
| 26.623  | 26.1057 | 26.389  | 26.5486 | 26.2    | 26.1864 | 26.4182 | 26.9175 | 26.3074 | 26.5073 | 26.4646 | 25.8003 | Q9H2M9;Q9H2M9               | Q9H2M9           | Rab3 GTPase-acti   | RAB3GAP2        |
| 23.8919 | NaN     | 23.9447 | 23.1346 | 23.2545 | NaN     | NaN     | NaN     | NaN     | 23.461  | NaN     | NaN     | Q86Y56;Q86Y56-2             | Q86Y56;Q86Y56-2  | Ras-related protei | RAB43           |
| 22.4097 | 22.2614 | 22.4705 | 22.4835 | 22.4231 | 22.8102 | NaN     | NaN     | 22.8717 | 22.9254 | 22.9658 | 22.9467 | P20338;A0A087W              | P20338           | Ras-related protei | RAB44           |
| 27.0556 | 27.3233 | 27.0695 | 26.7421 | 27.3261 | 27.0141 | 28.1372 | 27.7698 | 28.9146 | 27.9335 | 27.3724 | 28.217  | P20339;P20339-2             | P20339;P20339-2  | Ras-related protei | RAB5A           |
| 25.5979 | 25.3865 | 25.9315 | 25.0733 | 25.6343 | 25.7455 | 26.0166 | 25.7617 | 26.6341 | 26.1176 | 25.6424 | 25.7607 | P61020;P61020-2             | P61020;P61020-2  | Ras-related protei | RAB5B           |
| 29.7002 | 29.6101 | 29.7488 | 29.5426 | 29.7574 | 29.7495 | 30.1725 | 29.7086 | 30.2342 | 30.0176 | 29.8217 | 30.151  | P51148;P51148-2             | P51148;P51148-2  | Ras-related protei | RAB5C           |
| 30.0129 | 29.6872 | 30.1752 | 29.9693 | 29.6475 | 30.1616 | 30.8409 | 30.5085 | 30.154  | 30.6217 | 30.3265 | 29.8575 | P20340-2;P20340             | P20340-2;P20340  | Ras-related protei | RAB6A           |
| 30.028  | 29.4676 | 29.6366 | 29.543  | 28.8703 | 29.3709 | 30.5766 | 29.6756 | 29.7645 | 30.1783 | 29.8131 | 29.8418 | P51149;C9J592;C             | P51149;C9J592;C  | Ras-related protei | RAB7A           |
| 29.0983 | 28.838  | 29.2823 | 28.7971 | 28.9696 | 29.0793 | 29.6559 | 28.9254 | 28.936  | 29.577  | 29.0334 | 28.6314 | P61006;P61006-2             | P61006;P61006-2  | Ras-related protei | RAB8A           |
| 28.2565 | 28.4627 | 28.5342 | 28.2453 | 28.4737 | 28.6897 | 28.875  | 27.5268 | 28.021  | 28.8601 | 28.555  | 28.7367 | Q92930;HOYNE9               | Q92930;HOYNE9    | Ras-related protei | RAB8B           |
| 25.2048 | 24.7201 | 24.6445 | 24.4109 | 24.2466 | 24.0728 | 24.5934 | 24.5778 | 25.2968 | 24.6315 | 24.4036 | 24.8259 | P51151;Q9NP90               | P51151           | Ras-related protei | RAB9A           |
| 25.55   | 25.0711 | 25.2545 | 25.5037 | NaN     | 25.0065 | NaN     | 24.8969 | 25.0517 | 24.7489 | NaN     | 24.6463 | Q9UI14;M0R3D4               | Q9UI14;M0R3D4;†  | Prenylated Rab     | ac RABAC1       |
| 23.7588 | 23.9584 | 23.9808 | 23.1242 | 23.3868 | NaN     | 23.8067 | 24.2679 | 23.9187 | 23.6843 | 24.0323 | 23.9371 | Q15276;Q15276-1             | Q15276;Q15276-1  | Rab GTPase-bindi   | RABEP1          |
| 24.2893 | 23.1368 | 24.0849 | 23.9458 | 23.3476 | 23.6851 | 23.8391 | NaN     | NaN     | 24.1657 | 23.8761 | 23.0798 | Q9Y3P9;Q9Y3P9-1             | Q9Y3P9;Q9Y3P9-1  | Rab GTPase-activ   | RABGAP1         |
| 25.0122 | 25.8992 | 24.2742 | 25.1088 | 25.5022 | 24.7595 | 25.5846 | NaN     | 24.2612 | NaN     | 25.3861 | 24.3969 | Q9UJ41;Q96MP8               | Q9UJ41           | Rab5 GDP/GTP ex    | RABGEF1         |
| 25.9114 | 25.3265 | 25.3397 | 25.4656 | 25.1655 | 25.2204 | 25.0854 | NaN     | 25.3371 | 25.2996 | 24.991  | 24.9263 | Q92696;H0YLH3;†             | Q92696;H0YLH3    | Geranylgeranyl tr  | RABGGTA         |
| 24.753  | 24.5394 | 24.766  | 24.3865 | 24.1499 | 24.551  | 24.1781 | NaN     | NaN     | NaN     | 24.5089 | NaN     | P53611;Q5T4U8               | P53611;Q5T4U8    | Geranylgeranyl tr  | RABGGTB         |
| 22.9309 | 23.3752 | 23.4655 | 22.5877 | 23.4067 | NaN     | NaN     | NaN     | NaN     | 23.4855 | NaN     | 23.5426 | P47224                      | P47224           | Guanine nucleoti   | c RABIF         |
| 24.8958 | 24.3621 | 23.7373 | 23.9897 | 24.4605 | 24.3501 | 23.9453 | 24.2703 | NaN     | 23.842  | NaN     | NaN     | Q5HYI8;F8WF50;†             | Q5HYI8;F8WF50;†  | Rab-like protein   | 3 RABL3         |
| NaN     | NaN     | NaN     | 20.5909 | NaN     | Q3YEC7;F2Z2T0;A             | Q3YEC7;F2Z2T0;A  | Rab-like protein   | 6 RABL6         |
| 29.8523 | 29.7359 | 30.3146 | 29.7988 | 29.8159 | 30.3901 | 29.9956 | 29.2903 | 30.3016 | 30.5495 | 30.694  | 30.7458 | P63000;P63000-2             | P63000;P63000-2  | Ras-related C3 bo  | RAC1            |
| 28.5242 | 28.1157 | 28.4166 | 28.2515 | 28.4198 | 28.7668 | 27.9763 | 27.6749 | 28.1062 | 28.9553 | 28.7196 | 28.4474 | P15153;B1AH77;B             | P15153;B1AH77;B  | Ras-related C3 bo  | RAC2            |
| NaN     | 22.8365 | NaN     | P60763;J3KSC4;J3            | P60763;J3KSC4;J3 | Ras-related C3 bo  | RAC3            |
| 29.3311 | 29.4745 | 29.9879 | 29.2065 | 29.2159 | 29.8192 | 31.5711 | 30.8613 | 30.8553 | 29.9673 | 29.2886 | 29.7594 | Q9H0H5;F8VRD2               | Q9H0H5;F8VRD2    | Rac GTPase-activ   | RACGAP1         |
| NaN     | 18.6201 | NaN     | NaN     | O60671;O60671-1             | O60671-1         | Cell cycle checkpo | RAD1            |
| 24.3705 | 23.7538 | 23.9704 | 24.1309 | 23.8242 | 24.4061 | NaN     | 24.3513 | NaN     | 23.0049 | 24.1137 | 24.021  | O60216;E5RI01;E             | O60216           | Double-strand-br   | RAD21           |
| 24.5231 | 24.3426 | 24.2165 | 23.9423 | 23.3561 | 24.1948 | 24.6842 | NaN     | NaN     | 24.5559 | 24.3683 | NaN     | P54725;P54725-2             | P54725;P54725-2  | UV excision repair | RAD23A          |
| 27.4246 | 27.4118 | 27.5066 | 26.9164 | 26.5986 | 27.3641 | 28.0251 | 26.4756 | 26.1628 | 27.4604 | 27.0674 | 26.7163 | P54727;Q5W055;†             | P54727;Q5W055;†  | UV excision repair | RAD23B          |
| 28.5788 | 26.9466 | 27.9181 | 29.3054 | 28.8556 | 28.5673 | 22.9755 | 22.4644 | 23.287  | 26.8571 | 26.4312 | 25.0237 | Q92878;Q92878-1             | Q92878;Q92878-1  | DNA repair protei  | RAD50           |
| NaN     | NaN     | NaN     | 22.6741 | NaN     | Q09MP3                      | Q09MP3           | RAD51-associated   | RAD51AP2        |
| 20.5491 | NaN     | O75771;K7EJ58;K             | O75771;K7EJ58;K  | DNA repair protei  | RAD51D;hCG_203  |
| 27.4691 | 27.4992 | 27.1443 | 27.2047 | 27.4308 | 27.1552 | 27.0527 | 27.5818 | 26.5982 | 27.6772 | 28.2223 | 27.4443 | P78406;E9PQ57;E             | P78406;E9PQ57    | mRNA export fact   | RAE1            |



|     |         |         |         |         |         |         |         |         |         |         |         |          |                                                             |  |
|-----|---------|---------|---------|---------|---------|---------|---------|---------|---------|---------|---------|----------|-------------------------------------------------------------|--|
|     | 26.2823 | 25.4765 | 26.1333 | 26.3692 | 25.9873 | 26.0376 | 26.18   | 26.0411 | 26.9584 | 27.1942 | 26.7953 | 27.1887  | P04049;P04049-2, P04049;P04049-2, RAF proto-oncogene RAF1   |  |
| NaN | NaN     | NaN     | NaN     | NaN     | NaN     | NaN     |         | 29.1689 | NaN     | NaN     | NaN     | NaN      | Q7Z5J4;A8MXE8;C Q7Z5J4;A8MXE8;C Retinoic acid-indu RAI1     |  |
|     | 26.2413 | 26.2069 | 25.7135 | 25.8648 | 25.8756 | 25.6815 | 26.1579 | 26.3155 | 26.2879 | 25.4977 | 25.486  | 26.1085  | Q9POK7-4;Q9POK Q9POK7-4;Q9POK Ankyr corbin RAI14            |  |
|     | 28.8728 | 29.1617 | 29.2115 | 28.9102 | 28.8555 | 29.3152 | 29.4105 | 28.332  | 28.789  | 29.9094 | 29.0697 | 29.1013  | P11233;H7C3P7;C P11233;H7C3P7 Ras-related protei RALA       |  |
|     | 26.2548 | 27.2266 | 27.0256 | 26.4223 | 26.9188 | 27.2454 | 27.6474 | 27.7044 | 27.0873 | 27.9924 | 27.1532 | 26.9986  | P11234;P11234-2, P11234;P11234-2, Ras-related protei RALB   |  |
|     | 24.7079 | 23.9754 | 24.1307 | 24.6171 | 23.434  | 24.4605 | 23.9457 | 24.3166 | 24.1551 | 24.2935 | 24.0537 | 24.6073  | Q15311 Q15311 RalA-binding prot RALBP1                      |  |
|     | 22.4782 | NaN     | NaN     | 22.4388 | NaN     | 21.7942 | NaN     | NaN     | NaN     | NaN     | NaN     | NaN      | Q6GYQ0;Q6GYQ0 Q6GYQ0;Q6GYQ0 Ral GTPase-activa RALGAP1       |  |
|     | 23.6199 | 23.7024 | 23.9733 | 23.7427 | 23.9455 | 23.7454 | NaN     | NaN     | NaN     | 23.6338 | 23.381  | NaN      | Q86X10;Q86X10- Q86X10;Q86X10- Ral GTPase-activa RALGAPB     |  |
|     | 29.3346 | 28.943  | 28.9395 | 29.5169 | 29.296  | 29.1406 | 27.3714 | 28.177  | 27.2892 | 28.195  | 28.7294 | 28.0935  | Q9UKM9;Q9UKM Q9UKM9;Q9UKM RNA-binding prot RALY             |  |
|     | 30.8677 | 30.9282 | 30.7033 | 30.5472 | 31.1903 | 30.9246 | 31.1781 | 30.9311 | 30.895  | 32.7198 | 33.3391 | 31.5526  | P62826;B5MDF5;J P62826;B5MDF5;J GTP-binding nucle RAN       |  |
|     | 28.8515 | 28.4961 | 28.3479 | 28.4167 | 28.475  | 28.2407 | 28.691  | 28.9247 | 28.9618 | 28.2681 | 28.5511 | 29.1382  | P43487;P43487-2, P43487;P43487-2, Ran-specific GTPa RANBP1  |  |
|     | 22.9543 | NaN     | NaN     | 23.0689 | NaN     | NaN     | NaN     | NaN     | NaN     | 23.2647 | 23.5594 | NaN      | Q6VN20;A0A0D9S Q6VN20;A0A0D9S Ran-binding prote RANBP10     |  |
|     | 26.4749 | 25.3235 | 25.2674 | 26.0523 | 25.5115 | 24.8043 | 23.736  | 25.7017 | 25.2629 | 24.993  | 25.0434 | 25.4383  | P49792;P0DJ0D;P P49792 E3 SUMO-protein RANBP2               |  |
|     | 23.3337 | 23.6174 | 22.9835 | 23.072  | 23.8953 | 23.0891 | NaN     | 23.207  | NaN     | 23.3842 | 23.3406 | 23.6465  | Q9H6Z4;Q9H6Z4- Q9H6Z4;Q9H6Z4- Ran-binding prote RANBP3      |  |
|     | 24.8141 | 24.5433 | 24.57   | 25.014  | 25.1107 | 24.8399 | NaN     | 24.3209 | 24.8976 | 24.3808 | 24.7411 | 24.7536  | Q96559;Q96559-2 Q96559;Q96559-2 Ran-binding prote RANBP9    |  |
|     | 27.7954 | 27.4713 | 27.8398 | 27.947  | 27.5849 | 27.9085 | 27.9259 | 27.5686 | 27.9498 | 28.1168 | 28.5026 | 28.5403  | P46060;H0Y4Q3;E P46060 Ran GTPase-activ: RANGAP1            |  |
|     | 22.3258 | NaN      | Q9HD47;Q9HD47 Q9HD47;Q9HD47- Ran guanine nucle RANGRF       |  |
|     | 25.7261 | 25.1296 | 25.4712 | 25.2311 | 24.0139 | NaN     | 24.857  | NaN     | NaN     | 26.116  | 24.6076 | 23.8587  | P62834;A0A075B P62834;A0A075Bf Ras-related protei RAP1A     |  |
|     | 30.2618 | 29.8846 | 30.3678 | 29.9753 | 29.6702 | 30.0775 | 30.5525 | 29.3244 | 29.6939 | 30.3915 | 29.7704 | 29.8851  | P61224;P61224-3, P61224;P61224-3, Ras-related protei RAP1B  |  |
|     | 24.8272 | 24.5034 | 24.7032 | 24.8052 | 24.3715 | 24.463  | 25.2665 | NaN     | 24.7257 | 25.1373 | 24.7709 | 24.8083  | P52306;P52306-2, P52306;P52306-2, Rap1 GTPase-GDF RAP1GDS1  |  |
|     | 27.7453 | 27.4605 | 27.7475 | 27.7111 | 27.3521 | 28.1132 | 27.9801 | 27.3603 | 28.1426 | 28.3811 | 27.7407 | 28.1122  | P61225 P61225 Ras-related protei RAP2B                      |  |
|     | 22.6104 | 23.4832 | 24.3939 | 23.3167 | 23.808  | NaN     | 22.0066 | NaN     | NaN     | 22.1776 | 23.1519 | 23.6215  | Q9Y3L5;A0A087X Q9Y3L5;A0A087X; Ras-related protei RAP2C     |  |
|     | 25.1086 | 23.8478 | 24.0926 | 24.5707 | 23.8715 | NaN     | 23.068  | 24.295  | 24.0274 | 24.2347 | 24.2653 | 24.104   | Q8TEU7;E9PCH4; Q8TEU7;E9PCH4; Rap guanine nucle RANGF6      |  |
|     | 24.3596 | 25.1519 | 25.4722 | 24.2022 | 24.6905 | 24.5039 | 23.7737 | NaN     | 24.7301 | 24.2254 | 24.2064 | 23.7657  | Q70E73;C9K0J5;C Q70E73;C9K0J5;C Ras-associated an RAPH1     |  |
|     | 29.9208 | 29.3128 | 29.5945 | 30.0453 | 29.5622 | 29.7386 | 29.0934 | 29.3215 | 29.5143 | 29.5132 | 29.5697 | 29.5625  | P54136;P54136-2, P54136;P54136-2 Arginine-tRNA lig RARS     |  |
|     | 26.1822 | 25.3162 | 25.7407 | 26.0841 | 25.1107 | 25.7517 | 25.3233 | 24.6426 | 25.2965 | 25.6271 | 25.3869 | 25.1135  | P20936;E9PGC0;P P20936;E9PGC0;P Ras GTPase-activ: RASA1     |  |
|     | 24.4271 | 24.2227 | 25.1057 | 24.7279 | 25.6863 | 25.0143 | NaN     | NaN     | NaN     | 25.3279 | 25.3125 | 25.1954  | Q15283;A0A0A0N Q15283;A0A0A0N Ras GTPase-activ: RASA2       |  |
|     | 25.2034 | 24.9228 | 26.3118 | 25.6813 | 25.4239 | 26.0107 | 25.8519 | 24.4967 | 25.5368 | 27.8256 | 27.1418 | 26.5191  | Q14644;Q14644- Q14644;Q14644-2 Ras GTPase-activ: RASA3      |  |
|     | 24.094  | 24.7048 | 24.4974 | 23.9558 | 24.5628 | 24.6176 | 25.4059 | NaN     | 24.4526 | 25.3832 | 25.1283 | 25.306   | Q9UIJF-2;Q9UIJF Q9UIJF-2;Q9UIJF2 Ras GTPase-activ: RASAL2   |  |
|     | 23.5238 | NaN     | 23.2013 | 22.7387 | 23.4092 | 23.0079 | NaN     | NaN     | NaN     | 23.0179 | NaN     | NaN      | P50749;P50749-2, P50749;P50749-2 Ras association dc RASSF2  |  |
| NaN |         | 22.1325 | NaN      | Q02833;H0YEI0;A Q02833;H0YEI0;A Ras association dc RASSF7   |  |
|     | 23.9417 | NaN     | 23.3952 | 23.6082 | 23.2584 | NaN     | NaN     | NaN     | NaN     | 23.495  | 23.4519 | NaN      | Q8IY67;Q8IY67-2; Q8IY67;Q8IY67-2; Ribonucleoprotein RAVR1   |  |
|     | 25.3281 | 23.1668 | 24.4841 | 25.1336 | 23.6782 | 24.1441 | NaN     | NaN     | NaN     | 24.6509 | 24.3122 | NaN      | P06400 P06400 Retinoblastoma-a RB1                          |  |
|     | 25.2288 | NaN     | 25.2984 | NaN      | Q8TDY2;Q8TDY2- Q8TDY2;Q8TDY2- RB1-inducible coil RB1CC1     |  |
|     | 25.3821 | 25.7724 | 25.3176 | 25.1985 | 25.5885 | 25.5526 | 24.5032 | 24.618  | NaN     | 24.9282 | 25.48   | 25.2974  | Q09028;Q09028- Q09028;Q09028-3 Histone-binding p RBBP4      |  |
|     | 23.2734 | NaN     | 23.261  | 23.6307 | NaN     | 23.0722 | NaN     | NaN     | NaN     | 23.5258 | 23.5292 | NaN      | Q15291;Q15291- Q15291;Q15291-2 Retinoblastoma-b RBBP5       |  |
| NaN | NaN     | NaN     | NaN     | 21.3429 | NaN      | Q7Z6E9;Q7Z6E9-2 Q7Z6E9;Q7Z6E9-2 E3 ubiquitin-prote RBBP6    |  |
|     | 28.367  | 28.1128 | 28.0095 | 28.2843 | 28.2148 | 28.2208 | 27.3592 | 27.9059 | 27.6055 | 28.7763 | 28.9317 | 28.7217  | Q16576;E9PCS2;C Q16576;E9PCS2;C Histone-binding p RBBP7     |  |
|     | 24.2638 | 24.4591 | 24.3981 | 23.9379 | 24.351  | 24.0323 | 25.1245 | NaN     | NaN     | 25.0216 | 25.1937 | 24.2576  | O75884;A0A087W O75884;A0A087W Putative hydrolas RBBP9       |  |
|     | 23.8587 | 23.7897 | 23.7933 | 23.8928 | 23.7089 | 23.6457 | 23.5814 | NaN     | 23.586  | 23.8671 | NaN     | 23.6739  | Q9BYM8;Q9BYM Q9BYM8;Q9BYM RanBP-type and C RBCK1            |  |
|     | 21.6375 | NaN      | O43251;O43251- O43251;O43251-2 RNA binding prot RBFOX2      |  |
| NaN |         | 22.9933 | 22.0153 | NaN     | 22.0653 | 22.3797 | NaN     | NaN     | NaN     | NaN     | NaN     | NaN      | Q9H477-2;Q9H47 Q9H477-2;Q9H47 Ribokinase RBKS               |  |
| NaN |         | 22.6727 | NaN     | 23.0204 | NaN     | 23.4201 | NaN     | NaN     | NaN     | NaN     | NaN     | NaN      | P98175;P98175-2 P98175;P98175-2, RNA-binding prot RBM10     |  |
|     | 25.1396 | 24.7386 | 24.8931 | 25.2548 | 24.7677 | 25.0936 | 24.1794 | NaN     | 24.2425 | 25.0385 | 24.998  | 25.467   | Q9NTZ6 Q9NTZ6 RNA-binding prot RBM12                        |  |
|     | 21.9337 | NaN     | 22.1225 | 22.9733 | 22.2002 | 22.2786 | NaN     | NaN     | NaN     | 22.4499 | NaN     | 22.4499  | NaN NaN Q8IXT5;B9ZVT1 Q8IXT5;B9ZVT1 RNA-binding prot RBM12B |  |
|     | 26.8316 | 26.7841 | 26.9556 | 27.6829 | 27.2087 | 27.3873 | 25.6845 | 24.0223 | 26.5767 | 27.1028 | 28.0894 | 27.0817  | Q96PK6;Q96PK6- Q96PK6 RNA-binding prot RBM14                |  |
|     | 23.3661 | 24.1282 | 23.2587 | 23.858  | 23.6625 | 23.6402 | NaN     | NaN     | NaN     | 23.2271 | 23.5886 | Q96PK6-5 | Q96PK6-5 RNA-binding prot RBM14                             |  |
|     | 25.1904 | 25.1649 | 25.5941 | 25.5701 | 25.9234 | 25.4307 | NaN     | 24.657  | 24.8631 | 25.6824 | 25.7764 | 26.3525  | Q96T37-3;Q96T3 Q96T37-3;Q96T3 Putative RNA-binc RBM15       |  |
|     | 23.9308 | 24.1744 | 23.5766 | 23.7762 | 24.1028 | 24.0091 | NaN     | NaN     | NaN     | NaN     | 23.5387 | NaN      | Q96I25;Q5W011; Q96I25 Splicing factor 45 RBM17              |  |
|     | 24.1027 | 23.7898 | 23.6129 | 23.7766 | 23.7588 | NaN     | NaN     | NaN     | NaN     | 23.8147 | 23.8375 | 23.9542  | Q9NW64-2;Q9NW Q9NW64-2;Q9NW Pre-mRNA-splicin RBM22          |  |
|     | 27.539  | 26.3187 | 26.7657 | 27.5932 | 26.4563 | 26.8135 | 25.6974 | 25.281  | 24.82   | 26.8947 | 26.8724 | 26.1657  | P49756;P49756-2, P49756 RNA-binding prot RBM25              |  |
| NaN | NaN     | NaN     | NaN     | NaN     | NaN     | NaN     | NaN     | NaN     | NaN     | NaN     | NaN     | NaN      | Q5T8P6;Q5T8P6- Q5T8P6;Q5T8P6-3 RNA-binding prot RBM26       |  |
|     | 24.4596 | NaN     | 22.6561 | 23.7698 | 23.4865 | NaN     | NaN     | NaN     | NaN     | 22.1716 | NaN     | 22.4649  | NaN NaN Q9NW13;Q9NW1 Q9NW13;Q9NW1 RNA-binding prot RBM28    |  |
|     | 24.6676 | 26.2785 | 26.0815 | 24.9806 | 25.8025 | 25.7725 | 25.2292 | 26.758  | 25.5972 | 24.7568 | 25.9054 | 26.1281  | P98179 P98179 RNA-binding prot RBM3                         |  |
| NaN | NaN     | NaN     | NaN     | NaN     | NaN     | NaN     | NaN     | NaN     | 19.9923 | NaN     | NaN     | NaN      | P42696;A2A2V2;C P42696;A2A2V2 RNA-binding prot RBM34        |  |
|     | 28.069  | 26.2495 | 26.9079 | 27.9985 | 26.5518 | 26.9828 | 25.0862 | 26.2847 | 25.9491 | 27.2552 | 27.3711 | 27.4223  | Q14498;Q14498- Q14498;Q14498-2 RNA-binding prot RBM39       |  |
|     | 22.4414 | NaN     | NaN     | 22.4562 | NaN      | Q9BWF3;E9PB51; Q9BWF3;E9PB51; RNA-binding prot RBM4;RBM4B   |  |
| NaN |         | 22.6558 | NaN     | 22.9425  | Q9BTD8;K7EQ03;I Q9BTD8;K7EQ03;I RNA-binding prot RBM42      |  |
|     | 21.013  | NaN      | P52756;C9JFQ5;P P52756;C9JFQ5;P RNA-binding prot RBM5       |  |
|     | 22.9026 | NaN     | 22.4212 | 22.6431 | NaN     | NaN     | NaN     | NaN     | NaN     | 22.1355 | NaN     | NaN      | Q9Y580;J3KPD3;G Q9Y580;J3KPD3;G RNA-binding prot RBM7       |  |







[illegible]



|         |         |         |         |         |         |         |         |         |         |         |         |                   |                   |                                   |
|---------|---------|---------|---------|---------|---------|---------|---------|---------|---------|---------|---------|-------------------|-------------------|-----------------------------------|
| 30.8831 | 30.2041 | 30.693  | 31.0543 | 30.8027 | 30.8277 | 29.7708 | 31.2293 | 30.5402 | 30.4613 | 31.115  | 30.7417 | P46778;M0R181;C   | P46778;M0R181     | 60S ribosomal pro RPL21           |
| 30.1633 | 29.2896 | 30.2526 | 30.8345 | 30.12   | 30.5211 | 29.2784 | 30.4559 | 29.7624 | 30.296  | 30.7668 | 30.1177 | P35268;K7ER17;K7  | P35268;K7ER17;K7  | 60S ribosomal pro RPL22           |
| NaN     | NaN     | 23.0611 | NaN     | Q6PSR6;C9IYQ9;I   | Q6PSR6;C9IYQ9;I   | 60S ribosomal pro RPL22L1         |
| 30.0058 | 29.299  | 29.3485 | 30.1855 | 29.567  | 29.5004 | 29.0987 | 29.8101 | 29.7385 | 30.0026 | 30.158  | 29.5924 | P62829;C9JD32;J3  | P62829;C9JD32;J3  | 60S ribosomal pro RPL23           |
| 30.1712 | 29.1404 | 29.5704 | 29.8893 | 29.0906 | 29.3929 | 29.609  | 30.2497 | 28.2215 | 29.754  | 30.1251 | 29.1548 | P62750;H7BY10;K   | P62750;H7BY10;K   | 60S ribosomal pro RPL23A          |
| 29.7662 | 29.1218 | 29.6227 | 30.0656 | 29.7085 | 29.6277 | 27.5906 | 29.6339 | 28.9557 | 28.7678 | 29.6192 | 29.2912 | P83731;C9JXB8;C   | P83731;C9JXB8;C   | 60S ribosomal pro RPL24           |
| 31.0539 | 30.545  | 30.7046 | 31.2371 | 30.9673 | 31.0142 | 29.8589 | 31.447  | 30.7351 | 30.8802 | 31.3778 | 31.0836 | P61254;J3QR17;J3  | P61254;J3QR17;J3  | 60S ribosomal pro RPL26;RPL26L1   |
| 31.4081 | 29.6058 | 30.2842 | 31.1255 | 30.0034 | 30.3246 | 29.7793 | 30.3965 | 29.0758 | 30.5782 | 30.6952 | 29.9389 | P61353;K7ELC7;K   | P61353;K7ELC7;K   | 60S ribosomal pro RPL27           |
| 30.3373 | 29.3953 | 29.983  | 30.4741 | 30.0377 | 30.0441 | 28.4074 | 30.4783 | 29.6475 | 30.7327 | 30.1727 | 30.036  | P46776;E9PJ09;E   | P46776;E9PJ09;E   | 60S ribosomal pro RPL27A          |
| 30.9876 | 30.5676 | 30.8429 | 31.2432 | 31.3603 | 30.8024 | 30.3514 | 31.8702 | 31.006  | 31.0659 | 31.5499 | 30.6033 | P46779;H0YKD8;P   | P46779;H0YKD8;P   | 60S ribosomal pro RPL28           |
| 28.8212 | 28.8892 | 29.1648 | 29.2125 | 29.2947 | 29.383  | 28.2658 | 30.3532 | 28.8945 | 28.6283 | 29.9548 | 29.8957 | P47914;F8WF43;C   | P47914            | 60S ribosomal pro RPL29           |
| 32.7834 | 31.8426 | 32.2534 | 32.8564 | 32.4551 | 32.3094 | 31.3947 | 32.7286 | 31.8335 | 32.0089 | 32.2484 | 32.2571 | P39023;G5E9G0;E   | P39023;G5E9G0;E   | 60S ribosomal pro RPL3            |
| 30.4618 | 29.8386 | 29.7533 | 30.2685 | 30.501  | 29.81   | 28.8939 | 30.4309 | 29.2323 | 29.2437 | 30.2058 | 29.9886 | P62888;E5RI99;E5  | P62888;E5RI99;E5  | 60S ribosomal pro RPL30           |
| 29.7742 | 28.9676 | 29.4451 | 29.9933 | 29.3712 | 29.4601 | 28.9514 | 30.2535 | 29.1551 | 29.7586 | 30.1833 | 29.4387 | P62899;P62899-3   | P62899;P62899-3   | 60S ribosomal pro RPL31           |
| 30.857  | 29.9714 | 30.3545 | 30.948  | 30.5877 | 30.623  | 29.3737 | 30.832  | 29.9147 | 30.745  | 31.0091 | 30.0292 | P62910;D3YT81;F   | P62910;D3YT81;F   | 60S ribosomal pro RPL32           |
| 30.2641 | 29.1205 | 29.8302 | 30.0214 | 29.6653 | 30.0923 | 28.9433 | 30.0271 | 29.1337 | 29.2589 | 30.0967 | 29.7559 | P49207            | P49207            | 60S ribosomal pro RPL34           |
| 29.5981 | 28.6897 | 29.4434 | 29.8955 | 29.4671 | 29.78   | 28.3973 | 29.972  | 29.1191 | 29.068  | 29.7689 | 29.5712 | P42766;F2Z388     | P42766;F2Z388     | 60S ribosomal pro RPL35           |
| 29.907  | 29.0992 | 29.6284 | 30.4018 | 29.6407 | 29.6029 | 29.1013 | 30.1873 | 29.1067 | 30.2335 | 30.126  | 29.5213 | P18077;C9K025;F   | P18077;C9K025;F   | 60S ribosomal pro RPL35A          |
| 29.4636 | 28.882  | 29.4046 | 29.6097 | 28.9678 | 29.3682 | 28.8376 | 29.7155 | 28.9556 | 29.2194 | 29.8712 | 29.3075 | Q9Y3U8;J3QS85;I   | Q9Y3U8;J3QS85     | 60S ribosomal pro RPL36           |
| NaN     | P83881;J3KQ4;H    | P83881;J3KQ4;H    | 60S ribosomal pro RPL36A;RPL36A-H |
| 27.1125 | 26.7925 | 26.357  | 26.8249 | 27.0757 | 25.9189 | 26.9813 | 28.7954 | 27.3147 | 25.3795 | 27.037  | 27.2477 | Q969Q0;R4GN19     | Q969Q0            | 60S ribosomal pro RPL36AL         |
| 23.6664 | NaN     | 24.5965 | NaN     | NaN     | 25.8658 | 26.7888 | 28.7636 | 27.8859 | NaN     | 25.8912 | 20.6062 | P61927;D6RG19     | P61927            | 60S ribosomal pro RPL37           |
| 27.6669 | 26.9499 | 26.7539 | 28.0027 | 27.2214 | 26.5946 | 27.9435 | 28.2038 | NaN     | 26.3534 | 26.838  | 26.0604 | P61513;C9J4Z3;Q   | P61513;C9J4Z3;Q   | 60S ribosomal pro RPL37A          |
| 27.774  | 27.9832 | 28.1046 | 28.7131 | 28.2416 | 28.3166 | 26.9753 | 27.7606 | 27.279  | 27.493  | 28.0926 | 27.1604 | P63173;J3KT73;J3  | P63173;J3KT73;J3  | 60S ribosomal pro RPL38           |
| 24.1007 | 24.571  | 25.566  | 24.0622 | NaN     | NaN     | NaN     | NaN     | 23.8832 | NaN     | 26.3271 | 25.6288 | P62891;Q59GN2     | P62891;Q59GN2     | 60S ribosomal pro RPL39;RPL39P5   |
| NaN     | 24.6871 | 19.9439 | NaN     | 25.6597 | 19.7485 | 22.2423 | NaN     | NaN     | NaN     | NaN     | NaN     | Q92901            | Q92901            | 60S ribosomal pro RPL3L           |
| 32.2937 | 31.2966 | 31.8908 | 32.4061 | 31.6328 | 32.0214 | 30.9995 | 31.9631 | 30.865  | 31.8868 | 32.0174 | 31.4641 | P36578;H3BM89;I   | P36578;H3BM89     | 60S ribosomal pro RPL4            |
| 30.8121 | 30.1456 | 30.9354 | 30.8449 | 30.3238 | 30.7211 | 30.5829 | 30.8689 | 29.9096 | 31.3886 | 31.3969 | 30.7658 | P46777;Q5T7N0;F   | P46777            | 60S ribosomal pro RPL5            |
| 31.9778 | 30.9433 | 31.5087 | 32.1131 | 31.3258 | 31.6148 | 30.6912 | 31.6168 | 30.7658 | 31.6127 | 31.998  | 31.4652 | Q02878;F8VZ45;U   | Q02878            | 60S ribosomal pro RPL6            |
| 32.3731 | 30.0958 | 31.7819 | 32.6186 | 31.5138 | 32.0625 | 31.1138 | 31.6314 | 30.8411 | 31.7842 | 31.6088 | 31.386  | P18124;A8MUD9;I   | P18124;A8MUD9     | 60S ribosomal pro RPL7            |
| 32.369  | 31.2159 | 31.7048 | 32.4765 | 31.6729 | 31.873  | 31.1853 | 31.8266 | 30.7965 | 31.5653 | 31.8615 | 31.5663 | P62424;Q5T8U3;C   | P62424;Q5T8U3     | 60S ribosomal pro RPL7A           |
| 24.8936 | 22.664  | 24.1266 | 25.3423 | 23.4447 | 23.834  | 23.4754 | NaN     | NaN     | 23.5403 | 23.0866 | 26.0604 | Q6DKI1;R4GMU7;I   | Q6DKI1;R4GMU7;I   | 60S ribosomal pro RPL7L1          |
| 31.7072 | 30.9032 | 31.3513 | 31.6635 | 31.2771 | 31.535  | 30.6834 | 31.786  | 30.792  | 31.1311 | 31.6513 | 31.1793 | P62917;E9PK20;E   | P62917;E9PK20;E   | 60S ribosomal pro RPL8            |
| 29.9593 | 29.2699 | 29.81   | 30.3509 | 29.8276 | 29.7051 | 28.7281 | 29.8628 | 29.5025 | 29.3263 | 29.5937 | 29.2671 | P32969;D6RAN4;I   | P32969;D6RAN4;I   | 60S ribosomal pro RPL9            |
| 31.2004 | 29.8953 | 30.0811 | 31.06   | 30.4458 | 30.3237 | 29.7443 | 29.9614 | 29.6588 | 30.0559 | 30.0976 | 29.7801 | P05388;F8VW50;F   | P05388;F8VW50;F   | 60S acidic ribosom RPLP0;RPLPOP6  |
| 30.8092 | 30.0677 | 28.7146 | 31.2903 | 29.7306 | NaN     | P05386            | P05386            | 60S acidic ribosom RPLP1          |
| 31.0292 | 30.434  | 30.1861 | 30.9801 | 30.2468 | 30.2186 | 29.7661 | 30.2319 | 29.3413 | 30.2683 | 30.0198 | 29.3037 | P05387;H0YDD8;F   | P05387            | 60S acidic ribosom RPLP2          |
| 28.5532 | 28.4663 | 28.6427 | 29.1696 | 28.6131 | 28.9531 | 28.9269 | 29.0909 | 29.759  | 28.8246 | 28.4925 | 28.7671 | P04843;B7Z4L4;F   | P04843;B7Z4L4     | Dolichyl-diphosph RPN1            |
| 27.4977 | 27.3639 | 27.3709 | 27.9388 | 27.2935 | 27.5236 | 27.7304 | 27.8931 | 28.6697 | 27.2442 | 27.1668 | 27.4898 | P04844;P04844-2   | P04844;P04844-2   | Dolichyl-diphosph RPN2            |
| 20.7635 | NaN     | O95059            | O95059            | Ribonuclease P pr RPP14           |
| 23.0317 | 22.7517 | NaN     | 23.0305 | 23.025  | NaN     | NaN     | NaN     | NaN     | 22.7393 | 24.1518 | NaN     | Q9BU19            | Q9BU19            | Ribonuclease P pr RPP25           |
| 25.0213 | 23.0283 | 23.2689 | 24.5478 | 23.4493 | 23.7581 | 22.3803 | NaN     | NaN     | 24.579  | 22.9911 | NaN     | P78346;P78346-2   | P78346;P78346-2   | Ribonuclease P pr RPP30           |
| 23.8185 | NaN     | NaN     | 24.0099 | NaN     | NaN     | NaN     | NaN     | NaN     | 23.3038 | 23.8151 | NaN     | O75818;O75818-2   | O75818;O75818-2   | Ribonuclease P pr RPP40           |
| 25.0844 | 25.9544 | 25.6918 | 25.4353 | 26.3843 | 25.9796 | 25.292  | 25.2254 | 25.6366 | 26.1685 | 26.4247 | 26.7514 | Q9NQG5;E9PIQ9;I   | Q9NQG5            | Regulation of nucl RPRD18         |
| NaN     | NaN     | NaN     | 22.1231 | NaN     | Q5VT52;Q5VT52-1   | Q5VT52-1          | Regulation of nucl RPRD2          |
| 29.7475 | 29.529  | 29.4149 | 29.6103 | 29.687  | 29.4278 | 28.7861 | 29.302  | 28.4947 | 29.4085 | 29.232  | 28.7168 | P46783;F6U211;C   | P46783;F6U211     | 40S ribosomal pro RPS10           |
| NaN     | NaN     | 23.1742 | NaN     | 22.8072 | 23.0987 | NaN     | NaN     | NaN     | 23.0867 | 23.3028 | 23.1349 | S4R435;O95989     | S4R435            | RPS10-NUDT3                       |
| 31.4195 | 30.4585 | 30.8807 | 31.3425 | 30.91   | 30.9443 | 29.9779 | 31.4939 | 30.9175 | 30.9273 | 31.445  | 31.1765 | P62280;MOQCZ5;I   | P62280;MOQCZ5     | 40S ribosomal pro RPS11           |
| 29.4904 | 28.5454 | 28.4182 | 29.1521 | 28.2765 | 28.3231 | 28.6387 | 28.2454 | 27.916  | 28.4743 | 28.7804 | 28.2851 | P25398            | P25398            | 40S ribosomal pro RPS12           |
| 30.9417 | 29.6189 | 30.2353 | 30.8283 | 29.9717 | 30.2547 | 29.2595 | 30.1689 | 29.5722 | 30.0706 | 30.2971 | 29.9411 | P62277;J3KMX5;E   | P62277;J3KMX5     | 40S ribosomal pro RPS13           |
| 31.0884 | 30.5024 | 30.4387 | 31.0473 | 30.8558 | 30.5258 | 29.5032 | 30.886  | 29.8047 | 30.3157 | 30.8395 | 30.5052 | P62263;H0YB22;E   | P62263;H0YB22;E   | 40S ribosomal pro RPS14           |
| 28.3047 | 28.7232 | 28.8705 | 29.2094 | 28.4934 | 28.4475 | 28.9236 | 29.5691 | 27.9973 | 28.8135 | 29.3793 | 28.421  | P62841;K7ELC2;K   | P62841;K7ELC2;K   | 40S ribosomal pro RPS15           |
| 30.4445 | 29.6247 | 30.1122 | 30.7159 | 30.0911 | 30.2539 | 28.5885 | 29.3324 | 29.7331 | 29.7571 | 30.2569 | 29.6839 | P62244;I3L3P7;I3I | P62244;I3L3P7;I3I | 40S ribosomal pro RPS15A          |
| 31.5576 | 30.8761 | 31.1737 | 31.9196 | 31.426  | 31.4713 | 30.0823 | 31.0517 | 30.7486 | 31.3829 | 31.3449 | 30.8711 | P62249;M0R210;I   | P62249;M0R210;I   | 40S ribosomal pro RPS16;ZNF90     |
| 30.5229 | 30.1266 | 30.0752 | 30.123  | 30.7913 | 29.8944 | 29.792  | 31.0375 | 30.5878 | 29.639  | 30.2317 | 30.1081 | P08708;H0YN88;A   | P08708;H0YN88;A   | 40S ribosomal pro RPS17           |
| 31.3005 | 30.3806 | 30.8415 | 31.3681 | 30.9373 | 30.9245 | 30.2766 | 31.628  | 30.8166 | 31.1899 | 31.1421 | 30.6331 | P62269;J3S569;A0  | P62269            | 40S ribosomal pro RPS18           |
| 29.9822 | 29.9248 | 29.8435 | 29.8782 | 29.8687 | 29.7338 | 29.4335 | 30.8502 | 29.2888 | 30.2281 | 30.5884 | 29.7981 | P39019;A0A0758B   | P39019;A0A0758B   | 40S ribosomal pro RPS19           |
| 32.0682 | 30.8542 | 31.5114 | 32.1517 | 31.314  | 31.6413 | 30.4753 | 31.2892 | 30.5096 | 31.3073 | 31.3    | 31.003  | P15880;H0YEN5;E   | P15880;H0YEN5;E   | 40S ribosomal pro RPS2            |
| 29.7045 | 29.477  | 29.3483 | 29.8824 | 29.6202 | 29.4175 | 28.6921 | 29.1129 | 29.1526 | 29.2099 | 29.8472 | 29.2532 | P60866;P60866-2   | P60866;P60866-2   | 40S ribosomal pro RPS20           |
| 27.8666 | 28.8062 | 28.2909 | 27.411  | 28.7923 | 27.9986 | 27.9797 | 27.7728 | 27.359  | 27.5754 | 29.006  | 29.0619 | P63220;Q8WVC2;I   | P63220;Q8WVC2;I   | 40S ribosomal pro RPS21           |



|         |         |         |         |         |         |         |         |         |         |         |         |                  |                  |                                 |                            |
|---------|---------|---------|---------|---------|---------|---------|---------|---------|---------|---------|---------|------------------|------------------|---------------------------------|----------------------------|
| 30.6734 | 29.8624 | 29.9974 | 30.5607 | 30.6888 | 30.1719 | 29.1981 | 30.8879 | 29.7841 | 29.5781 | 30.3174 | 30.0715 | P62266;D6RD47;I  | P62266;D6RD47;I  | 40S ribosomal pro RPS23         |                            |
| 30.0919 | 29.714  | 30.0784 | 30.2984 | 30.2283 | 30.3144 | 29.061  | 30.4804 | 29.719  | 29.7894 | 30.4493 | 30.0358 | P62847;E7ETK0;Ai | P62847;E7ETK0;Ai | 40S ribosomal pro RPS24         |                            |
| 29.9788 | 28.8089 | 29.5262 | 30.1422 | 29.212  | 29.5384 | 28.4482 | 29.8802 | 29.2085 | 29.6993 | 29.8868 | 29.7095 | P62851           | P62851           | 40S ribosomal pro RPS25         |                            |
| 30.952  | 29.4887 | 29.9035 | 30.5392 | 29.4263 | 29.4831 | 28.7305 | 29.3661 | 28.703  | 29.3888 | 28.9967 | 29.0384 | P62854;Q5JNZ5    | P62854           | 40S ribosomal pro RPS26         |                            |
| 30.1597 | 28.9336 | 28.9846 | 29.9027 | 29.0466 | 28.9803 | 27.5819 | 28.7727 | 27.5535 | 29.0024 | 29.3405 | 28.0206 | P42677;Q5T4L4;C  | P42677;Q5T4L4    | 40S ribosomal pro RPS27         |                            |
| 30.4148 | 30.1801 | 30.6735 | 30.5305 | 29.9127 | 30.5057 | 30.6422 | 30.689  | 30.455  | 30.2554 | 30.1655 | 29.9276 | P62979;P62987;J  | P62979;P62987;J  | Ubiquitin-40S ribo RPS27A;UBA52 |                            |
| 25.7975 | 26.0628 | 25.8037 | 25.7975 | 26.2971 | 25.7974 | 25.6116 | NaN     | NaN     | 25.9413 | 26.6759 | NaN     | Q71UM5;H0YMV     | Q71UM5;H0YMV     | 40S ribosomal pro RPS27L        |                            |
| 26.5925 | 27.3269 | 26.9886 | 26.5464 | 27.0756 | 26.7459 | 27.5064 | 27.7149 | 26.7822 | 26.4633 | 27.7665 | 27.1204 | P62857           | P62857           | 40S ribosomal pro RPS28         |                            |
| 26.2678 | 26.6971 | 26.7966 | 25.7941 | 26.6875 | 26.3474 | 26.4205 | 27.8394 | NaN     | 26.7844 | 27.6337 | NaN     | P62273;P62273-2  | P62273;P62273-2  | 40S ribosomal pro RPS29         |                            |
| NaN     | 20.7199 | NaN     | E9PJN9           | E9PJN9           | RPS3                            |                            |
| 31.9119 | 31.0647 | 31.54   | 32.185  | 31.6824 | 31.7373 | 30.5317 | 31.0249 | 31.1227 | 31.6595 | 31.7546 | 30.904  | P23396;P23396-2  | P23396;P23396-2  | 40S ribosomal pro RPS3          |                            |
| 32.3506 | 31.4018 | 31.7242 | 32.492  | 31.5316 | 31.8055 | 30.9746 | 31.6896 | 30.911  | 31.4716 | 31.5178 | 31.1782 | P61247;D6RAT0;C  | P61247;D6RAT0;C  | 40S ribosomal pro RPS3A         |                            |
| 32.1183 | 31.2286 | 31.9016 | 32.5742 | 31.8062 | 32.0944 | 30.9657 | 31.9247 | 31.5691 | 32.0347 | 32.2442 | 31.7926 | P62701;Q8TD47    | P62701           | 40S ribosomal pro RPS4X         |                            |
| 31.0625 | 30.419  | 30.5606 | 31.0392 | 30.8893 | 30.4306 | 29.7134 | 30.3554 | 29.8114 | 30.1135 | 30.5814 | 30.0816 | P46782;M0R0F0;†  | P46782;M0R0F0;†  | 40S ribosomal pro RPS5          |                            |
| 31.5524 | 30.7984 | 31.2177 | 31.7885 | 31.174  | 31.4615 | 30.3215 | 31.4168 | 30.7516 | 31.1823 | 31.4072 | 30.8486 | P62753;A2A3R5;A  | P62753;A2A3R5    | 40S ribosomal pro RPS6          |                            |
| 25.9804 | 25.5766 | 25.6155 | 25.8965 | 25.6804 | 25.8894 | 25.8217 | 25.5718 | 26.3033 | 25.8982 | 25.6323 | 25.8699 | Q15418;Q15418-1  | Q15418;Q15418-2  | Ribosomal protein RPS6KA1       |                            |
| 27.9083 | 27.0702 | 27.5617 | 27.6394 | 27.1019 | 27.5598 | 27.0547 | 26.9716 | 26.7486 | 27.6152 | 27.3532 | 27.098  | P51812;B1AXG1;C  | P51812           | Ribosomal protein RPS6KA3       |                            |
| 23.3753 | NaN     | 23.5754 | 23.4453 | NaN     | 23.268  | NaN     | NaN     | NaN     | 23.6066 | 23.8394 | NaN     | Q75676;A0A0A6Y   | Q75676;A0A0A6Y   | Ribosomal protein RPS6KA4       |                            |
| 24.0027 | 23.0152 | 23.8748 | 23.7632 | 23.3217 | NaN     | P23443;P23443-2  | P23443;P23443-2  | Ribosomal protein RPS6KB1       |                            |
| 31.5389 | 30.7991 | 31.2816 | 31.4281 | 31.1825 | 31.3277 | 30.0894 | 31.2063 | 30.7436 | 30.6411 | 31.3328 | 30.9539 | P62081;B5MCP9    | P62081;B5MCP9    | 40S ribosomal pro RPS7          |                            |
| 32.1262 | 31.0865 | 31.6356 | 32.2581 | 31.3026 | 31.6403 | 30.6284 | 31.7733 | 30.7044 | 31.5073 | 31.6007 | 31.0596 | P62241;Q5JR95    | P62241;Q5JR95    | 40S ribosomal pro RPS8          |                            |
| 32.6294 | 31.1194 | 31.9576 | 32.7808 | 31.729  | 32.1518 | 30.8562 | 31.3659 | 31.0876 | 31.6603 | 31.8036 | 31.4443 | P46781;A0A024R   | P46781;A0A024R   | 40S ribosomal pro RPS9          |                            |
| 31.3277 | 30.7018 | 30.8556 | 31.3372 | 30.7428 | 30.8766 | 30.2793 | 30.6821 | 30.474  | 31.8183 | 32.1025 | 30.7345 | P08865;C9J9K3;A  | P08865;C9J9K3;A  | 40S ribosomal pro RPSA          |                            |
| 26.4786 | 25.3121 | 25.3713 | 26.1285 | 25.1785 | 26.3507 | 25.4916 | 25.5405 | NaN     | 25.6881 | 25.5504 | 26.1179 | Q8N122;Q8N122-   | Q8N122;Q8N122-   | Regulatory-associ RPTOR         |                            |
| 21.3475 | NaN     | 21.803  | 21.2161 | 21.4295 | NaN     | NaN     | NaN     | NaN     | 21.9456 | 22.2981 | 22.5546 | Q8IZ73;Q8IZ73-2  | Q8IZ73;Q8IZ73-2  | RNA pseudouridyl RPU5D2         |                            |
| 24.8191 | 24.4649 | 24.2857 | 24.4551 | NaN     | 24.2407 | NaN     | NaN     | NaN     | 24.1056 | NaN     | NaN     | Q92600;Q92600-   | Q92600;Q92600-   | Cell differentiation RQCD1      |                            |
| NaN     | 22.8588 | NaN     | NaN     | NaN     | P55042;J3KRG9;J  | P55042;J3KRG9;J  | GTP-binding prote RRAD          |                            |
| 25.321  | 24.8633 | 24.5888 | 25.2706 | 24.8169 | NaN     | NaN     | NaN     | NaN     | 24.8767 | 24.8877 | NaN     | Q7L523;Q5VZM2-   | Q7L523;Q5VZM2-   | Ras-related GTP-b RRAGA;RRAGB   |                            |
| 24.2912 | 23.8399 | 23.7709 | 23.5242 | 23.6192 | 23.4237 | 23.6711 | NaN     | 23.7588 | 23.8431 | 23.5877 | 23.6682 | Q9HB90;Q9NQL2    | Q9HB90;Q9NQL2    | Ras-related GTP-b RRAGC;RRAGD   |                            |
| 27.2254 | 26.9201 | 27.6147 | 27.1107 | 26.8553 | 27.6676 | 26.7137 | 26.3621 | 27.1326 | 27.0074 | 26.5792 | 26.9539 | P10301           | P10301           | Ras-related protei RRAS         |                            |
| 29.422  | 29.3779 | 30.2134 | 29.5832 | 29.6153 | 30.4904 | 29.0875 | 28.7852 | 29.2561 | 29.8433 | 29.6393 | 29.7292 | P62070;P62070-4  | P62070;P62070-4  | Ras-related protei RRAS2        |                            |
| 28.2839 | 27.791  | 27.3688 | 28.196  | 27.5837 | 26.3326 | 26.9537 | 27.9737 | 26.7144 | 24.4762 | 24.1323 | 25.199  | Q9P2E9;A0A0A0N   | Q9P2E9;A0A0A0N   | Ribosome-binding RRPB1          |                            |
| 28.654  | 27.9206 | 28.5873 | 27.4139 | 27.4832 | 27.4905 | 27.386  | 26.2693 | 27.0345 | 26.8782 | 26.6392 | 25.1234 | P23921;E9PL69;E  | P23921;E9PL69    | Ribonucleoside-di RRM1          |                            |
| 26.2781 | 26.2845 | 26.5588 | 24.5369 | 25.2563 | 25.0949 | 25.7999 | 26.7069 | 26.0559 | 24.8229 | 24.9704 | 25.7585 | P31350;P31350-2  | P31350;P31350-2  | Ribonucleoside-di RRM2          |                            |
| 22.0463 | NaN     | Q7LG56;Q7LG56-1  | Q7LG56;Q7LG56-1  | Ribonucleoside-di RRM2B         |                            |
| 23.1043 | NaN     | 22.219  | 22.6228 | 22.4115 | NaN     | P56182;D6RE82    | P56182           | Ribosomal RNA pr RRP1           |                            |
| 27.8455 | 25.2504 | 26.2476 | 27.3336 | 25.535  | 26.2399 | 24.2497 | NaN     | NaN     | NaN     | 26.1621 | 25.3503 | 23.5171          | Q5JTH9;Q5JTH9-2  | Q5JTH9;Q5JTH9-2                 | RRP12-like protei RRP12    |
| 24.2942 | NaN     | 23.46   | 24.3663 | 23.0716 | 23.383  | NaN     | NaN     | NaN     | NaN     | NaN     | 23.5291 | NaN              | Q9Y3B9           | Q9Y3B9                          | RRP15-like protei RRP15    |
| 23.8164 | NaN     | 23.0604 | 23.5352 | NaN              | Q14684;Q14684-2  | Q14684;Q14684-2                 | Ribosomal RNA pr RRP1B     |
| 23.1361 | NaN     | 23.3137 | 23.7876 | 23.1515 | NaN              | O43159;E9PPP6;E  | O43159;E9PPP6;E                 | Ribosomal RNA-pr RRP8      |
| 25.6221 | 23.8113 | 24.4633 | 25.754  | 24.9845 | 23.3484 | NaN     | NaN     | NaN     | NaN     | 25.8549 | 25.6474 | 25.0501          | O43818           | O43818                          | U3 small nucleola RRP9     |
| 25.3833 | 24.0186 | 24.2047 | 25.3201 | 24.9508 | 23.7905 | NaN     | NaN     | NaN     | NaN     | 23.7149 | 23.7428 | NaN              | Q15050           | Q15050                          | Ribosome biogen RRS1       |
| 23.1354 | NaN     | 22.2314 | 23.521  | 22.2435 | 22.5305 | NaN              | Q5VWQ0;A0A0C4    | Q5VWQ0;A0A0C4                   | Round spermatid RSBN1      |
| NaN     | 21.8529 | NaN              | Q96T23;H7C306;†  | Q96T23;H7C306;†                 | Remodeling and s RSF1      |
| 28.8673 | 27.3474 | 28.0146 | 29.2966 | 28.2011 | 28.3636 | 26.3562 | 25.0226 | 26.0594 | 28.1239 | 28.1683 | 27.6838 | O76021;J3QSV6;I  | O76021;J3QSV6;I  | Ribosomal L1 donr RSL1D1        |                            |
| NaN     | NaN     | NaN     | 21.806  | NaN              | Q9UHA3;H3BMQ     | Q9UHA3;H3BMQ                    | Probable ribosom RSL24D1   |
| 23.4696 | 23.554  | 24.3705 | 23.7153 | 23.4606 | 24.5949 | 24.4237 | NaN     | NaN     | NaN     | 24.9806 | 24.478  | 23.8086          | Q96DX4           | Q96DX4                          | RING finger and SI RSPRY1  |
| 23.9345 | NaN     | NaN     | 23.655  | NaN              | Q7L412;Q7L412-2  | Q7L412;Q7L412-2                 | Arginine/serine-ri RSRC2   |
| 25.3503 | 25.9502 | 25.605  | 25.3322 | 25.5327 | 25.4422 | 25.9153 | 25.5092 | 25.169  | 25.7751 | 25.1858 | 25.8503 | Q15404;Q15404-2  | Q15404;Q15404-2  | Ras suppressor pr RSU1          |                            |
| 25.658  | 24.9442 | 25.1704 | 25.7397 | 24.9306 | 25.089  | 24.8756 | 23.9482 | 24.0897 | 25.6895 | 25.3783 | 24.8627 | O00442;O00442-2  | O00442;O00442-2  | RNA 3-terminal pt RTCA          |                            |
| 29.2117 | 28.6248 | 28.339  | 28.5794 | 28.8347 | 28.4901 | 28.2314 | 28.495  | 28.4153 | 29.4815 | 29.6738 | 28.7453 | Q9Y310           | Q9Y310           | tRNA-splicing liga RTCB         |                            |
| 22.8138 | 23.1369 | 23.196  | 23.1207 | 22.831  | 23.0392 | 22.3343 | NaN     | NaN     | NaN     | 22.8041 | NaN     | NaN              | Q9BY42;A2A2L5;A  | Q9BY42;A2A2L5;A                 | Protein RTF2 hom RTFDC1    |
| NaN     | NaN     | NaN     | NaN     | 23.7574 | NaN              | Q9BST9;Q9BST9-2  | Q9BST9;Q9BST9-2                 | Rhotekin RTKN              |
| 25.7313 | 24.7628 | 26.1506 | 25.5141 | 25.0652 | 26.468  | 25.8332 | 26.8507 | 26.7958 | 26.364  | 24.7267 | 26.5015 | O95197;O95197-3  | O95197;O95197-3  | Reticulon-3 RTN3                |                            |
| NaN     | NaN     | 24.0394 | NaN     | 23.9488 | 21.7901 | NaN              | Q9NQC3-2;F8W9    | Q9NQC3-2;F8W9                   | Reticulon-4;Retic RTN4     |
| 28.1064 | 27.3562 | 27.9334 | 28.1208 | 27.1287 | 27.7683 | 28.1175 | 27.5047 | 27.5659 | 27.8664 | 27.0878 | 27.1029 | Q9NQC3-5         | Q9NQC3-5         | Reticulon-4 RTN4                |                            |
| NaN     | NaN     | 22.2892 | NaN     | 22.4244 | NaN     | NaN              | Q8WWV3;G3V1R     | Q8WWV3;G3V1R                    | Reticulon-4-intera RTN4IP1 |
| 26.7146 | 26.5209 | 26.5682 | 26.3245 | 26.014  | 26.3619 | 26.2934 | 26.6721 | 26.26   | 25.7487 | 25.6885 | 25.8539 | Q96T51;Q96T51-2  | Q96T51;Q96T51-2  | RUN and FYVE do RUFY1           |                            |
| 22.6578 | NaN     | NaN     | 22.5991 | NaN              | Q8WXA3-2;Q8WX    | Q8WXA3-2;Q8WX                   | RUN and FYVE do RUFY2      |
| 30.5258 | 30.3856 | 30.2126 | 30.8281 | 30.7226 | 30.443  | 29.7068 | 30.4042 | 29.9883 | 30.3207 | 30.4212 | 30.1891 | Q9Y265;Q9Y265-2  | Q9Y265;Q9Y265-2  | RuvB-like 1 RUVBL1              |                            |



|     |         |         |         |         |         |         |         |         |         |         |         |         |                  |                  |                           |                  |
|-----|---------|---------|---------|---------|---------|---------|---------|---------|---------|---------|---------|---------|------------------|------------------|---------------------------|------------------|
|     | 30.7142 | 30.6147 | 30.2242 | 30.807  | 30.747  | 30.4582 | 29.7875 | 30.515  | 29.8885 | 30.5315 | 30.6933 | 30.3179 | Q9Y230;Q9Y230-2  | Q9Y230;Q9Y230-2  | RuvB-like 2               | RUVBL2           |
| NaN | NaN     | NaN     | NaN     | NaN     | NaN     | NaN     | NaN     | NaN     | NaN     | NaN     | NaN     | 21.8493 | Q6NW29;D6R9C7    | Q6NW29;D6R9C7    | RWD domain-con            | RWDD4            |
|     | 20.659  | NaN     | NaN     | 21.2788 | NaN     | NaN     | NaN     | NaN     | NaN     | NaN     | 20.7897 | NaN     | P28702;A0A0G2J1  | P28702;A0A0G2J1  | Retinoic acid rece        | RXR8             |
|     | 31.9732 | 30.5706 | 31.1366 | 31.5073 | 30.1111 | 31.0315 | 31.4615 | 30.0469 | 29.5783 | 31.5875 | 30.3568 | 29.9422 | P60903           | P60903           | Protein S100-A10          | S100A10          |
|     | 30.3591 | 29.2695 | 29.3132 | 29.7432 | 28.7583 | 28.7973 | 29.9263 | 27.9241 | NaN     | 29.964  | 28.7601 | 27.8078 | P31949           | P31949           | Protein S100-A11; S100A11 |                  |
|     | 24.5471 | 27.047  | 25.507  | 25.5318 | 26.059  | 25.3907 | 26.6987 | 26.3853 | 26.0935 | 25.4487 | 25.6839 | 27.278  | Q99584           | Q99584           | Protein S100-A13          | S100A13          |
|     | 27.135  | 27.9094 | 28.0148 | 27.1557 | 27.4255 | 28.0551 | 28.2488 | 27.2135 | 26.9348 | 28.832  | 28.184  | 27.5417 | Q96FQ6           | Q96FQ6           | Protein S100-A16          | S100A16          |
| NaN | 21.7029 | 23.8521 | NaN     | NaN     | NaN     | 22.9915 | NaN     | NaN     | NaN     | 21.844  | NaN     | NaN     | P26447           | P26447           | Protein S100-A4           | S100A4           |
|     | 26.5139 | 27.3138 | 27.0655 | 27.0065 | 27.0132 | 27.2798 | 28.8241 | 28.1472 | 27.6498 | 28.3829 | 27.8296 | 28.0523 | P06703;R4GN98    | P06703;R4GN98    | Protein S100-A6;P         | S100A6           |
| NaN | NaN     | NaN     | NaN     | NaN     | NaN     | NaN     | NaN     | NaN     | NaN     | NaN     | NaN     | 19.8075 | P31151;Q86SG5    | P31151;Q86SG5    | Protein S100-A7;P         | S100A7;S100A7A   |
| NaN | NaN     | NaN     | NaN     | NaN     | NaN     | NaN     | NaN     | NaN     | 23.1626 | NaN     | NaN     | NaN     | P06702           | P06702           | Protein S100-A9           | S100A9           |
| NaN | NaN     | NaN     | NaN     | NaN     | NaN     | NaN     | NaN     | NaN     | NaN     | NaN     | 21.5382 | NaN     | P25815           | P25815           | Protein S100-P            | S100P            |
| NaN | 24.29   | 23.6262 | NaN     | 23.24   | 23.4299 | NaN     | PODJ18;E9PQD6;P1 | PODJ18;E9PQD6;P1 | Serum amyloid A-          | SAA1;SAA2;SAA2-1 |
|     | 23.3817 | NaN     | 22.1825 | 23.0885 | NaN     | NaN     | NaN     | NaN     | NaN     | 23.0301 | 22.7491 | 23.5465 | Q96ER3;J3KND1;E  | Q96ER3;J3KND1;E  | Protein SAAL1             | SAAL1            |
| NaN | NaN     | NaN     | 23.2995 | NaN     | A6NKF1;F8WC89;A  | A6NKF1;F8WC89;A  | SAC3 domain-con           | SAC3D1           |
|     | 26.2269 | 25.7362 | 25.9453 | 26.4302 | 25.9407 | 25.9387 | 26.7959 | 26.7949 | 26.6972 | 26.9464 | 26.5358 | 26.4733 | Q9NTJ5;E9PGZ4;C  | Q9NTJ5;E9PGZ4;C  | Phosphatidylinosi         | SACM1L           |
|     | 24.8804 | 24.3058 | 23.764  | 25.4247 | 24.3533 | 24.553  | 24.8281 | NaN     | NaN     | NaN     | 23.1906 | 23.9174 | Q9NZJ4;Q9NZJ4-2  | Q9NZJ4;Q9NZJ4-2  | Sacsin                    | SACS             |
|     | 25.978  | 26.3115 | 26.1965 | 25.9822 | 26.7452 | 26.1511 | 25.5034 | 25.835  | 25.1751 | 26.1754 | 26.6753 | 26.2738 | Q9UBE0;Q9UBE0-   | Q9UBE0;Q9UBE0-   | SUMO-activating           | SAE1             |
|     | 25.4178 | 25.9177 | 25.8555 | 25.3755 | 26.2228 | 25.6768 | 24.8009 | 26.2998 | 25.6492 | 24.9445 | 26.5391 | 26.9421 | Q15424;Q15424-2  | Q15424;Q15424-2  | Scaffold attachme         | SAFB             |
| NaN | NaN     | NaN     | NaN     | NaN     | NaN     | NaN     | NaN     | NaN     | NaN     | NaN     | NaN     | 23.3689 | Q14151;Q14151-2  | Q14151           | Scaffold attachme         | SAFB2            |
|     | 23.0782 | NaN     | 21.4353 | NaN     | Q9UPU9;Q9UPU9    | Q9UPU9;Q9UPU9    | Protein Smaug ho          | SAMD4A           |
|     | 26.8769 | 25.8298 | 26.3233 | 27.0338 | 26.8457 | 26.7582 | 24.6116 | NaN     | 25.0501 | 27.2477 | 27.3726 | 26.5948 | Q9Y3Z3;Q9Y3Z3-4  | Q9Y3Z3;Q9Y3Z3-4  | Deoxynucleoside           | SAMHD1           |
|     | 23.0536 | 23.3148 | 23.3317 | 23.2164 | 23.3508 | 23.0682 | NaN     | NaN     | 24.0654 | NaN     | NaN     | 22.8212 | Q9Y512           | Q9Y512           | Sorting and assen         | SAMM50           |
| NaN | NaN     | NaN     | NaN     | NaN     | 26.4027 | NaN     | Q9H0E3;H7BXF5;C  | Q9H0E3;H7BXF5;C  | Histone deacetyla         | SAP130           |
|     | 27.5148 | 26.5481 | 26.6905 | 27.6209 | 26.8457 | 26.5774 | 25.4961 | 26.0395 | NaN     | 27.3002 | 26.923  | 26.179  | X6RAL5;O00422;H  | X6RAL5;O00422;H  | Histone deacetyla         | SAP18            |
| NaN | NaN     | NaN     | NaN     | NaN     | NaN     | NaN     | 20.8044 | NaN     | NaN     | NaN     | NaN     | NaN     | O75446           | O75446           | Histone deacetyla         | SAP30            |
|     | 28.3067 | 27.2145 | 27.6516 | 27.8226 | 27.218  | 27.4597 | 28.4951 | 27.6048 | 27.0852 | 28.1217 | 27.762  | 26.9388 | Q9NR31;Q9NR31-   | Q9NR31;Q9NR31-   | GTP-binding prote         | SAR1A            |
| NaN | NaN     | NaN     | NaN     | NaN     | NaN     | NaN     | NaN     | NaN     | 20.3852 | NaN     | NaN     | NaN     | Q9Y6B6;D6RD69;C  | Q9Y6B6;D6RD69    | GTP-binding prote         | SAR1B            |
|     | 24.3034 | 25.8945 | 24.9101 | 24.1255 | 25.179  | 24.9144 | 24.7964 | 26.9209 | 24.6199 | 24.2887 | 25.3189 | 24.9672 | P82979;F8VZQ9;H  | P82979;F8VZQ9;H  | SAP domain-cont           | SARNP            |
|     | 29.6023 | 28.3079 | 28.4664 | 28.8488 | 27.9598 | 28.0488 | 28.4223 | 27.7641 | 26.5822 | 29.1184 | 28.6325 | 27.8268 | P49591;Q5T5C7    | P49591;Q5T5C7    | Serine--tRNA ligas        | SARS             |
|     | 23.8937 | 23.351  | 23.2034 | 23.8815 | 23.1552 | 23.0023 | NaN     | NaN     | NaN     | 23.7753 | 23.5774 | NaN     | Q9NP81;M0QWZ;    | Q9NP81;M0QWZ;    | Serine--tRNA ligas        | SARS2            |
|     | 24.0957 | 23.6823 | 24.0076 | 24.0164 | 23.8715 | 23.9527 | NaN     | NaN     | NaN     | 23.2595 | 23.6411 | NaN     | O43290;E9PQI8    | O43290           | U4/U6.U5 tri-snr          | SART1            |
|     | 26.9147 | 25.5459 | 26.3956 | 26.9696 | 26.3003 | 26.1762 | 23.9046 | 24.781  | 23.9914 | 26.2783 | 26.3059 | 26.5407 | Q15020;Q15020-4  | Q15020;Q15020-4  | Squamous cell car         | SART3            |
|     | 21.8459 | NaN     | Q6UVJ0           | Q6UVJ0           | Spindle assembly          | SASS6            |
|     | 23.1765 | NaN     | 23.2194 | 23.1259 | 22.8945 | NaN     | NaN     | NaN     | NaN     | 23.0721 | NaN     | NaN     | Q9H4B6;H0YJH0;C  | Q9H4B6;H0YJH0    | Protein salvador h        | SAV1             |
|     | 26.1998 | 26.3666 | 26.1338 | 26.4255 | 26.3732 | 25.8756 | 27.1253 | 26.955  | 27.3014 | 27.2559 | 27.1319 | 27.8011 | Q9Y3A5;A0A087X   | Q9Y3A5;A0A087X   | Ribosome matura           | SBD5             |
|     | 24.1243 | 23.9872 | 25.3067 | 24.674  | 24.2488 | 24.7465 | 23.0499 | 23.3386 | 23.2067 | 25.0312 | 24.905  | 24.6587 | O95248;O95248-2  | O95248;O95248-2  | Myotubularin-rele         | SBF1             |
|     | 22.9841 | NaN     | 22.5239 | 22.591  | NaN     | NaN     | NaN     | NaN     | NaN     | 23.152  | 22.8213 | NaN     | A3KN83;A3KN83-2  | A3KN83;A3KN83-2  | Protein strawberr         | SBNO1            |
| NaN | NaN     | NaN     | NaN     | NaN     | NaN     | NaN     | NaN     | NaN     | NaN     | NaN     | 21.8833 | NaN     | Q9H7N4           | Q9H7N4           | Splicing factor, arg      | SCAF1            |
| NaN | NaN     | NaN     | NaN     | NaN     | NaN     | NaN     | NaN     | NaN     | NaN     | NaN     | 20.7073 | NaN     | Q99590;A0A0A0N   | Q99590;A0A0A0N   | Protein SCAF11            | SCAF11           |
|     | 23.5603 | NaN     | 22.499  | 22.954  | NaN     | O95104;O95104-2  | O95104;O95104-2  | Splicing factor, arg      | SCAF4            |
| NaN | NaN     | NaN     | 21.6101 | NaN     | Q9UPN6;A0A0A0I   | Q9UPN6;A0A0A0I   | Protein SCAF8             | SCAF8            |
|     | 27.6905 | 26.9999 | 27.4597 | 27.6202 | 27.1479 | 27.4119 | 27.2706 | 26.7946 | 26.3618 | 26.2831 | 26.1481 | 26.3803 | O15126;A0A087V   | O15126;A0A087V   | Secretory carrier-        | SCAMP1           |
|     | 27.7364 | 27.3753 | 27.9553 | 28.1526 | 27.5391 | 28.2259 | 26.6534 | 26.7552 | 27.1966 | 26.4543 | 26.6499 | 27.0746 | O15127;H3BV04;C  | O15127;H3BV04;C  | Secretory carrier-        | SCAMP2           |
|     | 27.6195 | 27.101  | 27.2918 | 27.7329 | 27.2078 | 27.595  | 26.2797 | 26.7314 | 27.4356 | 26.3213 | 26.3624 | 27.0964 | O14828;O14828-2  | O14828;O14828-2  | Secretory carrier-        | SCAMP3           |
|     | 26.9944 | 25.9004 | 26.3003 | 26.2032 | 26.3367 | 26.7366 | 25.807  | 26.1364 | 27.294  | 26.5861 | 26.5504 | 26.572  | Q969E2;Q969E2-2  | Q969E2;Q969E2-2  | Secretory carrier-        | SCAMP4           |
|     | 26.4467 | 25.5236 | 25.912  | 26.087  | 25.677  | 25.8483 | 26.082  | 25.5844 | 26.1938 | 27.0165 | 25.8037 | 26.0202 | Q8WTV0-2;B7ZKC   | Q8WTV0-2;B7ZKC   | Scavenger recept          | SCARB1           |
|     | 28.1841 | 27.6814 | 27.8612 | 27.4725 | 27.3619 | 27.8301 | 27.0705 | 26.9979 | 27.8813 | 26.9798 | 26.645  | 27.4989 | Q14108;Q14108-2  | Q14108           | Lysosome membr            | SCARB2           |
|     | 25.7973 | 26.7381 | 26.4459 | 25.9749 | 26.7897 | 26.4084 | 25.9714 | 25.8719 | 27.2339 | 26.7372 | 26.6589 | 27.2047 | Q14162;A0A0A0N   | Q14162;A0A0A0N   | Scavenger recept          | SCARF1           |
|     | 24.1587 | NaN     | 24.0733 | 24.6893 | 24.3228 | NaN     | 24.0799 | 24.7694 | 24.6847 | 24.3038 | 24.0175 | NaN     | Q8NBX0           | Q8NBX0           | Saccharopine deh          | SCCPDH           |
|     | 26.6636 | 27.1707 | 26.5401 | 26.1475 | 26.9654 | 26.5195 | 26.4899 | 26.8948 | 26.8105 | 25.9621 | 26.4119 | 26.5779 | Q8WVM8;Q8WVM     | Q8WVM8;Q8WVM     | Sec1 family doma          | SCFD1            |
| NaN | NaN     | NaN     | NaN     | NaN     | NaN     | NaN     | 23.0689 | NaN     | NaN     | NaN     | NaN     | NaN     | P13521           | P13521           | Secretogranin-2;S         | SCG2             |
|     | 23.0163 | 23.1429 | 23.0248 | 23.0411 | 23.9013 | NaN     | NaN     | 22.7778 | 22.7843 | 23.0444 | NaN     | 23.2713 | Q96I15;H7C3V9;H  | Q96I15;H7C3V9;H  | Senolencysteine ly        | SCLY             |
| NaN | NaN     | NaN     | NaN     | 20.9429 | NaN     | Q9UQR0           | Q9UQR0           | Sex comb on midl          | SCML2            |
|     | 25.2721 | 26.1756 | 25.7701 | 25.3326 | 25.8943 | 26.0031 | 25.4589 | 25.323  | 26.2391 | 25.4548 | 25.6398 | 25.4935 | P22307;P22307-7  | P22307;P22307-7  | Non-specific lipid-       | SCP2             |
|     | 24.6743 | 23.5765 | 24.1489 | 23.033  | 22.9859 | 23.0155 | 25.0337 | 23.6645 | 24.2662 | 25.6532 | 25.2595 | NaN     | Q9HB40;I3L4Z9;Q  | Q9HB40           | Retinoid-inducible        | SCPEP1           |
|     | 28.016  | 28.1387 | 28.9293 | 28.463  | 28.3457 | 29.1106 | 28.4991 | 27.7641 | 28.0144 | 29.0489 | 28.8089 | 29.1111 | Q14160;A0A0G2J1  | Q14160;A0A0G2J1  | Protein scribble h        | SCRIB            |
|     | 26.7217 | 27.1706 | 26.9417 | 26.8826 | 27.131  | 27.0967 | 27.2543 | 27.3411 | 26.9721 | 26.9121 | 26.9041 | 27.2825 | Q12765;Q12765-2  | Q12765;Q12765-2  | Secernin-1                | SCRN1            |
|     | 23.0946 | 23.6388 | 23.0473 | 22.3593 | 23.8318 | NaN     | NaN     | NaN     | NaN     | 23.413  | 23.2945 | NaN     | Q96FV2;J3QL71;Q  | Q96FV2;J3QL71;Q  | Secernin-2                | SCRN2            |
|     | 26.7612 | 26.2135 | 26.6435 | 26.5045 | 26.3433 | 26.561  | 27.0551 | 26.724  | 26.6271 | 26.9495 | 26.8858 | 26.8235 | Q96KG9;Q96KG9-   | Q96KG9;Q96KG9-   | N-terminal kinase         | SCYL1            |



|     |         |         |         |         |         |         |         |         |         |         |         |         |         |         |         |         |         |         |                                                         |         |                                                  |                                                                   |                                                                    |                            |                         |
|-----|---------|---------|---------|---------|---------|---------|---------|---------|---------|---------|---------|---------|---------|---------|---------|---------|---------|---------|---------------------------------------------------------|---------|--------------------------------------------------|-------------------------------------------------------------------|--------------------------------------------------------------------|----------------------------|-------------------------|
|     | 23.2547 | NaN     |         | NaN     |         | 22.6056 | 22.3827 | NaN     |         | NaN     |         | NaN     |         | 23.1386 |         | 22.7158 | NaN     |         | Q6P3W7;F8VSC5; Q6P3W7;F8VSC5; SCY1-like protein γ SCYL2 |         |                                                  |                                                                   |                                                                    |                            |                         |
|     | 24.4462 | NaN     |         | 22.957  |         | 24.5687 | 23.1669 |         | 23.0807 | NaN     |         | NaN     |         | NaN     |         | 23.4044 | NaN     |         | Q9NVU7;E7EW05 Q9NVU7;E7EW05; Protein SDA1 horr SDAD1    |         |                                                  |                                                                   |                                                                    |                            |                         |
| NaN |         | NaN     |         | NaN     |         | NaN     |         | NaN     |         | 26.7253 | NaN     |         | NaN     |         | NaN     |         | NaN     |         | P18827;E9PHH3;† P18827 Syndecan-1 SDC1                  |         |                                                  |                                                                   |                                                                    |                            |                         |
| NaN |         | NaN     |         | NaN     |         | NaN     |         | NaN     |         | 24.4084 | NaN     |         | NaN     |         | NaN     |         | NaN     |         | P34741;E5RJB8;E5 P34741;E5RJB8;E5 Syndecan-2;Synde SDC2 |         |                                                  |                                                                   |                                                                    |                            |                         |
|     | 26.9863 |         | 27.0601 |         | 27.2376 |         | 26.7768 |         | 26.4519 |         | 26.6756 |         | 29.8203 |         | 29.0876 |         | 27.1831 |         | 27.7507                                                 | 27.4421 | 27.9209                                          | P31431;P31431-2 P31431;P31431-2 Syndecan-4 SDC4                   |                                                                    |                            |                         |
|     | 30.9274 |         | 31.0419 |         | 30.122  |         | 30.0975 |         | 29.8288 |         | 29.8036 |         | 31.851  |         | 30.6964 |         | 31.3013 |         | 30.4786                                                 | 29.7025 | 30.6719                                          | O00560;O00560-3 O00560;O00560-3 Syntenin-1 SDCBP                  |                                                                    |                            |                         |
|     | 25.1698 |         | 24.6246 |         | 23.9944 |         | 24.1755 | NaN     |         | 23.3242 |         | 25.6213 | NaN     |         | NaN     |         | 24.0603 |         | 22.5732                                                 | 23.5153 | O00560-2;G5EA05 O00560-2;G5EA05 Syntenin-1 SDCBP |                                                                   |                                                                    |                            |                         |
|     | 22.3342 | NaN     |                                                         | NaN     | NaN                                              | Q96C92;Q96C92-4 Q96C92;Q96C92-4 Serologically defin SDCACG3       |                                                                    |                            |                         |
|     | 24.9693 |         | 25.052  |         | 24.0332 | NaN     |         | 24.4735 |         | 24.204  |         | 23.8508 | NaN     |         | 24.5597 |         | 23.688  | NaN     |                                                         | 23.6484 | Q99470;K7ELU9 Q99470                             |                                                                   | Stromal cell-deriv SDF2                                            |                            |                         |
|     | 24.7311 |         | 25.1923 |         | 24.4853 |         | 24.8779 |         | 25.2842 |         | 24.8956 | NaN     |         | 25.869  |         | 25.4301 |         | 23.7362 |                                                         | 24.1846 | 24.4566                                          | Q9HCN8 Q9HCN8                                                     |                                                                    | Stromal cell-deriv SDF2L1  |                         |
|     | 24.8152 |         | 25.7987 |         | 25.2219 |         | 24.4703 |         | 26.1147 |         | 24.4271 |         | 27.3592 |         | 26.4625 |         | 26.5315 |         | 25.2099                                                 | 25.7429 | 25.8823                                          | Q9BRK5;Q9BRK5- Q9BRK5;Q9BRK5-45 kDa calcium-bi SDF4               |                                                                    |                            |                         |
|     | 27.1207 |         | 26.8776 |         | 26.463  |         | 27.0301 |         | 26.8879 |         | 26.4752 |         | 26.0243 |         | 27.5978 |         | 27.7407 |         | 26.8383                                                 | 27.0044 | 26.6231                                          | P31040;P31040-2, P31040;P31040-2 Succinate dehydr SDAH            |                                                                    |                            |                         |
|     | 23.8019 |         | 24.7251 |         | 24.6311 |         | 24.6438 |         | 24.9136 |         | 24.9035 | NaN     |         | 25.258  |         | 26.4839 |         | 23.4822 |                                                         | 24.9292 | 24.719                                           | P21912;A0A087W P21912;A0A087W Succinate dehydr SDBH               |                                                                    |                            |                         |
|     | 26.1509 |         | 25.8863 |         | 25.9509 |         | 26.292  |         | 25.4798 |         | 25.5835 |         | 26.2817 |         | 26.1411 | NaN     |         | 25.6153 |                                                         | 24.9502 | 24.6427                                          | O95810 O95810                                                     |                                                                    | Serum deprivation SDPR     |                         |
|     | 23.7646 |         | 24.1268 |         | 23.566  |         | 23.2304 |         | 23.4529 |         | 23.551  |         | 23.5896 | NaN     |         | NaN     |         | NaN     |                                                         | 24.0402 | NaN                                              |                                                                   | Q96GA7;F8VY23;† Q96GA7;F8VY23 Serine dehydrat SDSL                 |                            |                         |
|     | 24.2674 |         | 24.7041 |         | 24.7347 |         | 25.0147 |         | 24.6429 |         | 24.8578 |         | 25.0281 |         | 24.9037 |         | 25.5919 |         | 24.9649                                                 | 24.4712 | 24.8385                                          | P67812;H0YNG3;† P67812;H0YNG3;F Signal peptidase c SEC11A         |                                                                    |                            |                         |
|     | 26.4277 |         | 26.72   |         | 26.0108 |         | 26.4293 |         | 26.3689 |         | 26.4356 |         | 26.2188 |         | 26.5703 |         | 26.1909 |         | 26.7393                                                 | 26.5316 | 26.8419                                          | P55735;A8MXL6;† P55735;A8MXL6;† Protein SEC13 hor SEC13           |                                                                    |                            |                         |
|     | 22.9088 | NaN     |                                                         | NaN     | NaN                                              |                                                                   | Q92503;K7EJ08;Q Q92503;K7EJ08;Q SEC14-like protein SEC14L1         |                            |                         |
|     | 24.0488 |         | 24.7147 |         | 24.556  |         | 23.611  |         | 24.6094 |         | 24.7561 |         | 24.1249 | NaN     |         | 24.6323 |         | 23.8206 |                                                         | 24.0202 | 24.0612                                          | O76054;B3KRD8;† O76054;B3KRD8;† SEC14-like protein SEC14L2        |                                                                    |                            |                         |
|     | 25.4942 |         | 25.2507 |         | 24.8278 |         | 24.864  |         | 25.2177 |         | 24.5835 |         | 24.0441 |         | 25.0152 |         | 25.1105 |         | 24.0966                                                 | 24.1834 | 25.2317                                          | J3KNL6;O15027;O J3KNL6;O15027;O Protein transport SEC16A          |                                                                    |                            |                         |
|     | 27.8621 |         | 27.8547 |         | 27.5125 |         | 27.4807 |         | 27.4746 |         | 27.1157 |         | 27.3829 |         | 26.4179 |         | 27.2888 |         | 26.5105                                                 | 26.3971 | 26.3823                                          | O75396;A0A087X O75396                                             |                                                                    | Vesicle-trafficking SEC22B |                         |
|     | 28.987  |         | 28.9557 |         | 29.0763 |         | 28.7099 |         | 28.6787 |         | 28.9622 |         | 28.8563 |         | 28.8462 |         | 28.317  |         | 28.9119                                                 | 28.5568 | 28.4363                                          | Q15436;F5H365;C Q15436;F5H365;C Protein transport SEC23A          |                                                                    |                            |                         |
|     | 26.7343 |         | 26.5082 |         | 26.5152 |         | 26.6125 |         | 26.3743 |         | 26.2738 |         | 26.3243 |         | 26.3332 |         | 26.0191 |         | 25.9783                                                 | 25.7207 | 25.6569                                          | Q15437;Q5QPE1;† Q15437                                            |                                                                    | Protein transport SEC23B   |                         |
|     | 27.741  |         | 27.4629 |         | 27.6453 |         | 27.8645 |         | 27.7701 |         | 27.6994 |         | 27.0086 |         | 27.6671 |         | 27.176  |         | 27.3699                                                 | 27.3723 | 27.3684                                          | Q9Y6Y8;Q9Y6Y8-2 Q9Y6Y8;Q9Y6Y8-2 SEC23-interacting SEC23IP         |                                                                    |                            |                         |
|     | 25.1546 |         | 24.7643 |         | 25.3221 |         | 25.4303 |         | 25.1417 |         | 24.9064 |         | 24.9217 | NaN     |         | 24.8278 |         | 24.826  |                                                         | 24.6296 | 24.9447                                          | O95486;O95486-4 O95486                                            |                                                                    | Protein transport SEC24A   |                         |
|     | 24.8136 |         | 24.4134 |         | 24.4793 |         | 24.7843 |         | 24.7064 |         | 24.8293 |         | 24.3899 |         | 24.7607 |         | 24.6327 |         | 24.6959                                                 | 24.5493 | 24.6467                                          | O95487;O95487-3 O95487;O95487-3 Protein transport SEC24B          |                                                                    |                            |                         |
|     | 27.2338 |         | 26.9923 |         | 27.0816 |         | 26.7628 |         | 26.6709 |         | 26.9054 |         | 27.0091 |         | 27.0804 |         | 26.398  |         | 26.7361                                                 | 26.6363 | 26.6914                                          | P53992;G5EA31;P P53992;G5EA31                                     |                                                                    | Protein transport SEC24C   |                         |
|     | 26.0116 |         | 24.7934 |         | 25.0079 |         | 24.7927 |         | 24.7818 |         | 24.7965 | NaN     |         | 24.5426 |         | 25.1711 |         | 24.8226 |                                                         | 24.7149 | 23.7269                                          | O94855;O94855-4 O94855;O94855-2 Protein transport SEC24D          |                                                                    |                            |                         |
|     | 28.3281 |         | 27.9361 |         | 28.2148 |         | 28.35   |         | 28.0952 |         | 28.3754 |         | 27.6591 |         | 27.903  |         | 27.6421 |         | 28.2785                                                 | 28.2683 | 27.8998                                          | O94979;D6REX3;† O94979;D6REX3;† Protein transport SEC31A          |                                                                    |                            |                         |
|     | 27.2193 |         | 25.6647 |         | 26.0256 |         | 26.6653 |         | 25.8934 |         | 26.3008 |         | 26.6898 |         | 26.26   |         | 26.6484 |         | 26.6648                                                 | 26.2635 | 25.9634                                          | P61619;B4DR61;C P61619;B4DR61;C Protein transport SEC61A1;SEC61A2 |                                                                    |                            |                         |
|     | 26.5729 |         | 25.8656 |         | 26.3304 |         | 26.6014 |         | 25.8008 |         | 26.0487 |         | 26.6309 |         | 26.6608 |         | 26.091  |         | 26.2454                                                 | 26.3877 | 25.8573                                          | P60468;S4R3B5 P60468                                              |                                                                    | Protein transport SEC61B   |                         |
| NaN |         | NaN     |         | NaN     |         | 25.3623 | NaN     |         | NaN                                                     | NaN     |                                                  | P60059 P60059                                                     |                                                                    | Protein transport SEC61G   |                         |
|     | 26.851  |         | 26.1867 |         | 26.6288 |         | 26.8259 |         | 26.3146 |         | 26.4745 |         | 25.7144 |         | 26.9151 |         | 25.7131 |         | 26.4476                                                 | 26.1936 | 26.114                                           | Q99442;F8WF48;† Q99442;F8WF48;† Translocation pro SEC62           |                                                                    |                            |                         |
|     | 24.4276 |         | 23.7894 |         | 24.0749 |         | 24.6608 |         | 23.7538 |         | 24.0304 |         | 24.3238 |         | 24.8288 |         | 24.7566 |         | 24.2889                                                 | 24.3894 | 24.6409                                          | Q9UGP8;A6PVC9 Q9UGP8                                              |                                                                    | Translocation pro SEC63    |                         |
|     | 27.0789 |         | 26.417  |         | 26.5392 |         | 26.6641 |         | 26.3841 |         | 26.5    |         | 26.1613 |         | 26.6417 |         | 26.1476 |         | 26.7948                                                 | 27.0906 | 26.5715                                          | Q96EE3-1;Q96EE3 Q96EE3-1;Q96EE3 Nucleoporin SEH1 SEH1L            |                                                                    |                            |                         |
|     | 23.4262 |         | 23.9843 |         | 24.1537 |         | 23.7009 |         | 24.4527 |         | 24.2048 |         | 23.1032 | NaN     |         | NaN     |         | NaN     |                                                         | NaN     | NaN                                              |                                                                   | Q9UBV2 Q9UBV2                                                      |                            | Protein sel-1 hom SEL1L |
|     | 23.5686 | NaN     |         | 23.1444 | NaN     |         | NaN     |         | NaN     |         | 25.2308 |         | 24.4425 | NaN     |         | 25.0633 |         | 23.7207 |                                                         | 23.1726 | Q14563;C9J9C4 Q14563                             |                                                                   | Semaphorin-3A SEMA3A                                               |                            |                         |
|     | 22.6154 |         | 22.7476 |         | 22.6471 |         | 22.2444 |         | 22.5055 | NaN     |         | 26.0232 |         | 23.5229 |         | 24.615  |         | 25.6327 |                                                         | 24.6128 | 23.463                                           | Q99985;Q99985-4 Q99985                                            |                                                                    | Semaphorin-3C SEMA3C       |                         |
|     | 24.1338 |         | 25.0047 |         | 22.9076 |         | 24.0687 |         | 24.018  |         | 21.2761 |         | 27.4827 |         | 27.9552 |         | 25.9765 |         | 24.7462                                                 | 24.2651 | NaN                                              |                                                                   | O75326;O75326-2 O75326;O75326-2 Semaphorin-7A SEMA7A               |                            |                         |
| NaN |         | NaN     |         | NaN     |         | NaN     |         | NaN     |         | NaN     |         | NaN     |         | NaN     |         | NaN     |         | NaN     |                                                         | NaN     | 23.1394                                          | P04279;P04279-2 P04279;P04279-2 Semenogelin-1;Al SEMG1;SEMG2      |                                                                    |                            |                         |
|     | 23.9186 |         | 23.4791 |         | 24.4107 |         | 24.8482 |         | 24.1787 |         | 24.1721 | NaN     |         | NaN     |         | NaN     |         | 23.6452 |                                                         | 24.2256 | NaN                                              |                                                                   | Q9H4L4;A0A087X Q9H4L4;A0A087X Sentrin-specific pr SENP3;SENP3-EIF4 |                            |                         |
|     | 22.6509 |         | 23.7309 |         | 23.5055 |         | 23.055  |         | 24.0737 |         | 23.2545 | NaN     |         | NaN     |         | NaN     |         | 23.5657 |                                                         | 23.562  | 23.377                                           | P49903;P49903-2 P49903;P49903-2 Selenide, water di SEPHS1         |                                                                    |                            |                         |
|     | 25.5913 |         | 26.1139 |         | 26.2264 |         | 25.8096 |         | 26.2343 |         | 26.3173 |         | 26.5017 |         | 26.8123 |         | 25.7908 |         | 26.7017                                                 | 26.6546 | 25.8143                                          | Q9POV9;E7EW69; Q9POV9;E7EW69; Septin-10 SEPT10                    |                                                                    |                            |                         |
|     | 28.7394 |         | 29.6781 |         | 29.6324 |         | 28.955  |         | 30.0305 |         | 29.8846 |         | 30.1545 |         | 30.3599 |         | 30.062  |         | 29.4332                                                 | 29.902  | 30.0572                                          | Q9NVA2;D6RG13;† Q9NVA2;D6RG13;† Septin-11 SEPT11                  |                                                                    |                            |                         |
|     | 29.2141 |         | 30.1288 |         | 30.1831 |         | 29.4704 |         | 30.2243 |         | 30.4757 |         | 30.5531 |         | 30.7614 |         | 30.1444 |         | 30.111                                                  | 30.1834 | 30.3161                                          | Q15019;Q15019-2 Q15019;Q15019-2 Septin-2 SEPT2                    |                                                                    |                            |                         |
|     | 23.2162 |         | 23.5397 |         | 23.7648 |         | 23.2874 |         | 23.7938 |         | 23.7131 |         | 24.1004 |         | 24.3028 |         | 24.5324 |         | 23.7459                                                 | 23.5429 | NaN                                              |                                                                   | Q14141;B1AMS2; Q14141;B1AMS2;† Septin-6 SEPT6                      |                            |                         |
|     | 29.2454 |         | 30.1475 |         | 30.3321 |         | 29.5305 |         | 30.4188 |         | 30.5802 |         | 30.7663 |         | 30.6127 |         | 30.2285 |         | 30.3989                                                 | 30.4878 | 30.2885                                          | Q16181;E7ES33;E Q16181;E7ES33;E Septin-7 SEPT7                    |                                                                    |                            |                         |
|     | 25.5901 |         | 26.1264 |         | 26.2435 |         | 25.5314 |         | 26.4203 |         | 26.2791 |         | 26.4437 |         | 26.5886 |         | 26.5061 |         | 26.3337                                                 | 25.9711 | 24.9511                                          | Q92599;Q92599-4 Q92599;Q92599-4 Septin-8 SEPT8                    |                                                                    |                            |                         |
|     | 28.8824 |         | 29.394  |         | 29.4429 |         | 28.8629 |         | 29.5713 |         | 29.6944 |         | 29.3584 |         | 29.8323 |         | 29.4783 |         | 29.2967                                                 | 29.2939 | 29.2387                                          | Q9UHD8;Q9UHD8 Q9UHD8;Q9UHD8 Septin-9 SEPT9                        |                                                                    |                            |                         |
|     | 28.8084 |         | 29.7209 |         | 29.2775 |         | 28.2956 |         | 29.3036 |         | 28.7301 |         | 29.079  |         | 30.5189 |         | 29.3894 |         | 27.7987                                                 | 29.0279 | 29.064                                           | Q8NC51;Q8NC51- Q8NC51;Q8NC51- Plasminogen activ SERBP1            |                                                                    |                            |                         |
| NaN |         | NaN     |         | 23.6819 | NaN     |         | NaN                                                     | NaN     |                                                  | P84101;F8WB3;† P84101;F8WB3;† Small EDRK-rich fε SERF2            |                                                                    |                            |                         |
|     | 26.8709 | NaN     |         | 26.4944 |         | 26.8387 |         | 25.5942 |         | 26.7551 | NaN     |         | NaN     |         | NaN     |         | 26.9917 |         | 26.3186                                                 | NaN     |                                                  | Q9NRX5 Q9NRX5                                                     |                                                                    | Serine incorporat SERINC1  |                         |
| NaN |         | NaN     |         | NaN     |         | 22.4765 | NaN     |         | NaN                                                     | NaN     |                                                  |                                                                   | Q13530;Q13530-3 Q13530;Q13530-2 Serine incorporat SERINC3          |                            |                         |
|     | 26.3325 |         | 27.4324 |         | 26.9473 |         | 26.1496 |         | 27.1288 |         | 26.6911 |         | 26.2976 |         | 25.8181 |         | 27.0857 |         | 26.4299                                                 | 26.6859 | 26.9733                                          | P30740;P30740-2 P30740;P30740-2 Leukocyte elastas SERPINB1        |                                                                    |                            |                         |
| NaN |         | 24.5659 |         | 22.7887 | NaN     |         | 24.6735 |         | 22.9654 |         | 22.777  | NaN     |         | 24.9689 |         | 22.3428 | NaN     |         |                                                         | 23.9355 | P05120 P05120                                    |                                                                   | Plasminogen activ SERPINB2                                         |                            |                         |
|     | 26.5015 |         | 26.8566 |         | 26.7648 |         | 25.9713 |         | 26.6524 |         | 26.8309 |         | 26.891  |         | 26.5161 |         | 26.496  |         | 26.7577                                                 | 26.7154 | 26.6695                                          | P35237;A0A024Q P35237;A0A024Q Serpin B6 SERPINB6                  |                                                                    |                            |                         |
|     | 24.2107 |         | 24.492  |         | 24.1532 |         | 23.4892 |         | 24.0349 | NaN     |         | 23.9307 | NaN     |         | 24.2664 |         | 24.062  | NaN     |                                                         |         | 24.1538                                          | P50452;P50452-2 P50452;P50452-2 Serpin B8 SERPINB8                |                                                                    |                            |                         |
|     | 22.8206 |         | 24.4054 | NaN     |         | NaN     |         | 23.8342 | NaN     |         | NaN                                                     | NaN     |                                                  | P50453 P50453                                                     |                                                                    | Serpin B9 SERPINB9         |                         |
|     | 31.068  |         | 30.2592 |         | 30.6854 |         | 29.9751 |         | 30.1309 |         | 30.0837 |         | 30.7503 |         | 29.     |         |         |         |                                                         |         |                                                  |                                                                   |                                                                    |                            |                         |



|     |         |         |         |         |         |         |         |         |         |         |         |         |                                |                                |                               |              |
|-----|---------|---------|---------|---------|---------|---------|---------|---------|---------|---------|---------|---------|--------------------------------|--------------------------------|-------------------------------|--------------|
|     | 27.4171 | 29.0037 | 28.3657 | 27.9686 | 28.923  | 28.4609 | 29.5881 | 30.0116 | 30.5406 | 29.168  | 29.2464 | 29.6723 | P50454;E9PKH2;E                | P50454;E9PKH2;E                | Serpin H1                     | SERPINH1     |
|     | 27.6048 | 27.3933 | 27.7147 | 27.6352 | 27.598  | 28.1145 | 28.2845 | 28.0397 | 26.9067 | 28.617  | 28.4714 | 28.7794 | Q01105;Q01105-2                | Q01105;Q01105-2                | Protein SET;ProteI SET;SETSIP |              |
|     | 23.1261 | NaN     | 23.2206 | NaN     | NaN     | Q86TU7;Q6NXR6;Q86TU7;Q6NXR6;   | Q86TU7;Q6NXR6;Q86TU7;Q6NXR6;   | Histone-lysine N-ri           | SETD3        |
|     | 22.0442 | NaN     |         | 22.1121 | 21.8382 | NaN     |         | 21.9368 | NaN     | NaN     | 21.9034 | 22.1328 | Q8WTS6;D6RIA0                  | Q8WTS6;D6RIA0                  | Histone-lysine N-ri           | SETD7        |
| NaN | NaN     | NaN     | 21.7281 | NaN     |         | 22.7151 | NaN     | NaN     | NaN     | NaN     | NaN     | NaN     | Q6UXD5;A0A087V                 | Q6UXD5;A0A087V                 | Seizure 6-like prot           | SEZ6L2       |
|     | 25.9787 | 26.0459 | 26.4461 | 26.1227 | 26.4851 | 26.4653 | 25.6614 | 25.8647 | 25.0233 | 26.3243 | 26.4782 | 26.8733 | Q15637-6;Q1563;Q15637-6;Q15637 | Q15637-6;Q1563;Q15637-6;Q15637 | Splicing factor 1             | SF1          |
|     | 26.68   | 25.2158 | 26.2014 | 26.7626 | 25.5553 | 26.4367 | 24.8775 | NaN     | NaN     | 26.3121 | 26.3792 | 24.8746 | Q15459;Q15459-2                | Q15459;Q15459-2                | Splicing factor 3A            | SF3A1        |
|     | 25.7998 | 25.6992 | 26.169  | 26.668  | 26.4271 | 26.5995 | 24.9956 | 26.7584 | 24.9917 | 26.8171 | 27.245  | 26.5221 | Q15428;K7EMT0                  | Q15428;K7EMT0                  | Splicing factor 3A            | SF3A2        |
|     | 27.2874 | 25.7344 | 26.5715 | 26.9892 | 26.1458 | 26.6659 | 25.7181 | 26.0359 | 25.506  | 27.0578 | 26.9977 | 26.8651 | Q12874                         | Q12874                         | Splicing factor 3A            | SF3A3        |
|     | 29.1299 | 27.5379 | 28.5067 | 29.3443 | 28.311  | 28.8671 | 26.5266 | 26.5839 | 26.2725 | 28.2841 | 28.4402 | 27.9895 | O75533;H7C341;F                | O75533                         | Splicing factor 3B            | SF3B1        |
|     | 27.5101 | 27.4253 | 27.5267 | 27.3139 | 27.6523 | 27.4938 | 26.3802 | 27.8333 | 26.6315 | 27.4572 | 27.8986 | 28.2834 | Q13435;A0A087V                 | Q13435;A0A087V                 | Splicing factor 3B            | SF3B2        |
|     | 29.8531 | 28.8788 | 29.6466 | 29.9809 | 29.4961 | 29.745  | 28.4472 | 28.8719 | 28.1749 | 29.4587 | 29.6004 | 29.25   | Q15393;Q15393-2                | Q15393                         | Splicing factor 3B            | SF3B3        |
|     | 24.2811 | 24.3435 | 23.6371 | 24.2376 | NaN     | 23.6532 | NaN     | NaN     | NaN     | 24.1938 | 24.2595 | NaN     | Q15427;Q5S264                  | Q15427;Q5S264                  | Splicing factor 3B            | SF3B4        |
|     | 26.6077 | 27.16   | 26.7972 | 27.4527 | 27.5975 | 27.316  | 25.5164 | 26.5276 | 25.8469 | 26.8454 | 27.5604 | 27.234  | Q9BWJ5                         | Q9BWJ5                         | Splicing factor 3B            | SF3B5        |
|     | 24.9553 | 24.615  | 24.0392 | 24.6128 | 23.5015 | 24.0277 | 24.3485 | NaN     | 23.9495 | 24.334  | 24.4713 | 24.9177 | Q9Y3B4                         | Q9Y3B4                         | Splicing factor 3B            | SF3B6        |
|     | 30.5989 | 31.2873 | 31.1529 | 30.1519 | 30.9287 | 31.0037 | 31.7019 | 31.5945 | 31.0335 | 31.1937 | 31.3468 | 31.1687 | P31947;P31947-2                | P31947;P31947-2                | 14-3-3 protein sig            | SFN          |
|     | 30.2864 | 30.1426 | 30.1328 | 30.4006 | 30.4972 | 30.5058 | 29.1019 | 29.6573 | 29.2817 | 30.4423 | 30.8525 | 30.6285 | P23246;P23246-2                | P23246;P23246-2                | Splicing factor, pr           | SFPQ         |
| NaN | NaN     | NaN     | NaN     | 25.3239 | NaN     | O95562;Q5TIH2                  | O95562;Q5TIH2                  | Vesicle transport             | SFT2D2       |
| NaN | NaN     | NaN     | 21.618  | NaN     |         | 21.5576 | NaN     | NaN     | NaN     | NaN     | NaN     | NaN     | Q58719                         | Q58719                         | Vesicle transport             | SFT2D3       |
|     | 27.2071 | 27.5541 | 27.3761 | 27.6379 | 27.7482 | 27.3958 | 26.0692 | 27.5905 | 28.5673 | 24.7793 | 26.4366 | 26.9828 | Q9H9B4;D6RFI0;C                | Q9H9B4;D6RFI0;D                | Sideroflexin-1                | SFXN1        |
|     | 25.5449 | 25.3408 | 25.5935 | 26.0172 | 25.943  | 25.8109 | 24.6538 | 26.0527 | 26.9151 | NaN     | 24.7078 | 25.1517 | Q9BWM7;A0A0A                   | Q9BWM7;A0A0A                   | Sideroflexin-3;Sid            | SFXN3        |
| NaN |         | 22.3114 | NaN     | 21.7813 | NaN     | O43556;E9PEH6;C                | O43556;E9PEH6;C                | Epsilon-sarcoglyc             | SGCE         |
|     | 24.2894 | 23.3087 | 23.6492 | 24.4062 | 23.5626 | 23.6802 | 24.3355 | NaN     | NaN     | 23.7715 | 23.1111 | NaN     | O95470;H0Y3V8;+                | O95470                         | Sphingosine-1-ph              | SGPL1        |
|     | 23.2587 | 23.2167 | 23.2809 | 23.2283 | 23.1777 | NaN     | NaN     | NaN     | NaN     | 23.3896 | 23.6492 | 23.3681 | Q9BX95                         | Q9BX95                         | Sphingosine-1-ph              | SGPP1        |
| NaN | NaN     | NaN     | NaN     | NaN     | NaN     | NaN     | 23.5244 | 23.9135 | NaN     | NaN     | NaN     | NaN     | P51688;I3NI22;I3I              | P51688                         | N-sulphoglucosar              | SGSH         |
|     | 26.6017 | 26.0703 | 25.7042 | 25.7761 | 25.5121 | 25.5474 | NaN     | 26.1349 | 25.8126 | 26.2656 | 26.0212 | 26.3015 | O43765;K7EMD6;                 | O43765                         | Small glutamine-r             | SGTA         |
|     | 22.1477 | NaN     | Q96EQ0                         | Q96EQ0                         | Small glutamine-r             | SGTB         |
|     | 22.3439 | NaN     | NaN     | NaN     | 21.4954 | NaN     | Q9UQQ2;R4GN84                  | Q9UQQ2;R4GN84                  | SH2B adapter pro              | SH2B3        |
|     | 23.2992 | 22.8717 | 22.7521 | 22.7091 | 22.8999 | NaN     | NaN     | NaN     | NaN     | NaN     | NaN     | 22.9517 | Q9H788;Q9H788-                 | Q9H788;Q9H788-                 | SH2 domain-cont               | SH2D4A       |
| NaN | NaN     | NaN     | NaN     | 20.3105 | NaN     | Q6ZV89;E5RGV2;f                | Q6ZV89;E5RGV2;f                | SH2 domain-cont               | SH2D5        |
|     | 22.4873 | 24.2556 | 24.6008 | 22.8685 | 23.842  | 24.8869 | 24.2386 | NaN     | 24.2467 | 24.7184 | 24.7464 | 25.0728 | O75368                         | O75368                         | SH3 domain-bind               | SH3BGL       |
|     | 27.6219 | 29.5817 | 28.9389 | 28.1852 | 29.4397 | 29.2021 | 29.7739 | 29.8976 | 29.6904 | 29.26   | 29.6918 | 29.4919 | Q9H299;Q5T123;+                | Q9H299;Q5T123;+                | SH3 domain-bind               | SH3BGLR3     |
|     | 23.7996 | 23.6001 | 23.8641 | 23.768  | 24.0157 | NaN     | NaN     | NaN     | NaN     | NaN     | 24.0931 | NaN     | Q9Y3L3;Q9Y3L3-2                | Q9Y3L3;Q9Y3L3-2                | SH3 domain-bind               | SH3BP1       |
|     | 25.9233 | 25.6022 | 26.3306 | 25.9911 | 25.4528 | 26.433  | 25.4111 | NaN     | NaN     | 26.2801 | 25.5203 | 25.2214 | Q9POV3;Q9POV3-                 | Q9POV3;Q9POV3-                 | SH3 domain-bind               | SH3BP4       |
|     | 20.3406 | NaN     | Q7L8J4;Q7L8J4-2                | Q7L8J4;Q7L8J4-2                | SH3 domain-bind               | SH3BP5L      |
|     | 26.6335 | 27.3425 | 26.7341 | 26.4063 | 27.0392 | 26.9707 | 27.9911 | 28.0984 | 27.8278 | 26.7883 | 26.6337 | 27.808  | Q99961;Q99961-2                | Q99961;Q99961-2                | Endophilin-A2                 | SH3GL1       |
|     | 26.8305 | 27.1093 | 26.8791 | 26.7352 | 26.8401 | 27.0658 | 26.8923 | 27.3069 | 27.0241 | 26.5626 | 26.4514 | 26.7586 | Q9Y371;A0A087V                 | Q9Y371;A0A087V                 | Endophilin-B1                 | SH3GLB1      |
|     | 25.7359 | 26.2035 | 25.7794 | 25.7268 | 25.9569 | 25.9784 | 25.9047 | 26.2011 | 25.6898 | 25.7929 | 25.8814 | 25.7543 | Q9NR46;B7ZC38;f                | Q9NR46;B7ZC38;f                | Endophilin-B2                 | SH3GLB2      |
|     | 25.8488 | 26.847  | 26.5476 | 25.457  | 26.6013 | 26.1946 | 27.0959 | 27.4809 | 27.0758 | 26.1571 | 26.009  | 26.6079 | Q96B97;Q96B97-                 | Q96B97;Q96B97-                 | SH3 domain-cont               | SH3KBP1      |
|     | 23.2945 | 23.4485 | 23.4488 | 23.1452 | 23.3392 | 23.6039 | 23.1648 | NaN     | NaN     | NaN     | NaN     | NaN     | Q5TCZ1;H0Y507;C                | Q5TCZ1;H0Y507;C                | SH3 and PX doma               | SH3PXD2A     |
|     | 22.5045 | NaN     | Q9H0F6;Q9H0F6-                 | Q9H0F6;Q9H0F6-                 | Sharpin                       | SHARPIN      |
|     | 25.1133 | 24.9814 | 24.3141 | 24.1689 | 24.8698 | 24.5559 | 24.6866 | 23.9661 | 25.1114 | 24.3807 | 24.316  | 25.2746 | P29353;P29353-2                | P29353;P29353-2                | SHC-transforming              | SHC1         |
|     | 25.0769 | 24.3964 | 25.5834 | 25.7148 | 25.2257 | 25.8774 | 27.005  | 26.7666 | 26.531  | 26.6382 | 26.6047 | 26.7125 | Q8NEM2;I3L3Z1                  | Q8NEM2                         | SHC SH2 domain-i              | SHCBP1       |
|     | 23.8146 | NaN     | 24.4272 | 24.1938 | NaN     | 24.6382 | NaN     | 25.8282 | NaN     | NaN     | 26.3165 | NaN     | P60896                         | P60896                         | 26S proteasome c              | SHCPM1       |
| NaN | NaN     | NaN     | NaN     | NaN     | NaN     | NaN     | 21.8586 | NaN     | NaN     | NaN     | NaN     | NaN     | Q6UW14                         | Q6UW14                         | Protein shisa-2 ho            | SHISA2       |
|     | 22.8529 | 22.6467 | 23.2446 | NaN     | 22.6696 | NaN     | Q8TBC3;M0R2P6;                 | Q8TBC3;M0R2P6;                 | SH3KBP1-binding               | SHKBP1;KCTD3 |
|     | 26.8636 | 26.2367 | 26.3229 | 26.2331 | 26.113  | 25.967  | 26.5216 | 26.2039 | 26.1739 | 27.0165 | 27.0922 | 26.2138 | P34896;P34896-2                | P34896;P34896-2                | Serine hydroxyme              | SHMT1        |
|     | 30.0109 | 29.893  | 29.5228 | 30.114  | 30.0351 | 29.5836 | 28.9315 | 29.879  | 30.1946 | 29.9653 | 30.5282 | 29.5956 | P34897;P34897-3                | P34897;P34897-3                | Serine hydroxyme              | SHMT2        |
|     | 23.5135 | 23.5753 | 23.9686 | 23.9152 | 24.1444 | 24.583  | NaN     | NaN     | NaN     | 25.3414 | 25.2257 | 23.0095 | Q9UQ13;Q9UQ13                  | Q9UQ13;Q9UQ13                  | Leucine-rich repe             | SHPC2        |
|     | 23.3819 | NaN     | NaN     | NaN     | 22.8411 | NaN     | 24.2526 | NaN     | NaN     | 23.6784 | 24.0149 | NaN     | Q9UHI6;A0A0B4J;                | Q9UHI6;A0A0B4J;                | Sedoheptulokinas              | SHOK;TRPV1   |
| NaN | NaN     | NaN     | NaN     | NaN     | NaN     | NaN     | 23.6068 | NaN     | NaN     | NaN     | NaN     | NaN     | Q9HAT2;Q9HAT2-                 | Q9HAT2;Q9HAT2-                 | Sialate O-acetyles            | SIAE         |
| NaN | NaN     | NaN     | 23.1465 | 22.5477 | 22.872  | 22.8069 | NaN     | NaN     | 24.1693 | 22.7463 | 22.8852 | 23.6826 | Q99720;Q99720-2                | Q99720;Q99720-2                | Sigma non-opioid              | SIGMAR1      |
| NaN | NaN     | NaN     | NaN     | NaN     | NaN     | NaN     | 25.1547 | NaN     | NaN     | NaN     | NaN     | NaN     | Q9H173;D6REA1;                 | Q9H173;D6REA1;                 | Nucleotide exchar             | SIL1         |
|     | 25.3425 | 24.2963 | 24.5619 | 24.8242 | 24.5607 | 23.8356 | NaN     | NaN     | NaN     | 24.4559 | 24.5902 | NaN     | Q96TS3                         | Q96TS3                         | Paired amphipath              | SIN3A        |
| NaN | NaN     | NaN     | NaN     | NaN     | NaN     | NaN     | NaN     | NaN     | NaN     | NaN     | NaN     | NaN     | O75182-2;O75182                | O75182-2;O75182                | Paired amphipath              | SIN3B        |
|     | 24.4774 | 23.8819 | 23.8424 | 23.6086 | 23.9007 | 23.9985 | NaN     | NaN     | NaN     | 23.6986 | 23.079  | 23.2431 | Q96F54;F6RY50;E                | Q96F54;F6RY50                  | Signal-induced pr             | SIPA1        |
|     | 25.7255 | 25.5928 | 26.0503 | 25.9247 | 25.2707 | 26.044  | 24.2809 | 25.5466 | 25.687  | 24.8969 | 24.9375 | 24.7148 | O43166;O43166-2                | O43166;O43166-2                | Signal-induced pr             | SIPA1L1      |
|     | 22.8936 | 23.0262 | 23.4884 | 22.8058 | 22.8991 | 23.2835 | NaN     | NaN     | NaN     | 22.7423 | NaN     | NaN     | O60292                         | O60292                         | Signal-induced pr             | SIPA1L3      |
| NaN | NaN     | NaN     | NaN     | 19.5633 | NaN     | Q96EB6;B0QZ35;f                | Q96EB6;B0QZ35;f                | NAD-dependent p               | SIRT1        |
| NaN | NaN     | NaN     | NaN     | 21.1517 | NaN     | Q9NXA8;Q9NXA8                  | Q9NXA8;Q9NXA8                  | NAD-dependent p               | SIRT5        |



|         |         |         |         |         |         |         |         |         |         |         |         |                                                          |                                                        |                             |  |
|---------|---------|---------|---------|---------|---------|---------|---------|---------|---------|---------|---------|----------------------------------------------------------|--------------------------------------------------------|-----------------------------|--|
| NaN     | 22.7213 | 23.5355 | NaN                                                      | Q8N6T7;Q8N6T7-Q8N6T7;Q8N6T7- NAD-dependent p SIRT6     |                             |  |
| NaN     | NaN     | NaN     | NaN     | 23.5631 | NaN                                                      | Q8WVK7;J3QL03; Q8WVK7;J3QL03; Spindle and kinet SKA2   |                             |  |
| 25.9466 | NaN     | NaN     | NaN     | 27.0024 | 23.8738 | NaN                                                      | Q8IX90;Q8IX90-3 Q8IX90;Q8IX90-3 Spindle and kinet SKA3 |                             |  |
| 25.1484 | 24.7573 | 25.0649 | 24.8059 | 25.4981 | 24.97   | 24.3871 | 23.9494 | 24.6451 | 24.9813 | 25.0071 | 24.949  | P42285;HOY8U3;P42285                                     | Superkiller viralici SKIV2L2                           |                             |  |
| 27.0505 | 27.2152 | 26.3929 | 25.9862 | 26.8017 | NaN     | 26.7533 | 26.9453 | NaN     | 26.3973 | 26.7979 | 26.3276 | P63208;E5JRJ5;E7 P63208;E5JRJ5;E7 S-phase kinase-as SKP1 |                                                        |                             |  |
| 22.5906 | 23.0232 | 22.4199 | 21.2807 | 22.3544 | NaN                                                      | Q9P270 Q9P270                                          | SLAIN motif-conta SLAIN2    |  |
| 27.1122 | 27.0201 | 27.9228 | 27.1548 | 27.5563 | 27.8908 | 27.1943 | 25.9192 | 27.5753 | 28.0876 | 27.7017 | 28.1815 | P55011;P55011-3 P55011;P55011-3                          | Solute carrier fam SLC12A2                             |                             |  |
| 26.6918 | 26.5265 | 26.8729 | 26.8178 | 26.562  | 26.9299 | 27.4534 | 27.3684 | 27.4804 | 27.3845 | 27.389  | 27.1301 | Q9UP95;Q9UP95-Q9UP95;Q9UP95-                             | Solute carrier fam SLC12A4                             |                             |  |
| NaN     | 22.4981 | 22.7191 | NaN                                                      | Q9UHW9;Q9UHW Q9UHW9;Q9UHW                              | Solute carrier fam SLC12A6  |  |
| 22.8663 | 21.9937 | 22.9071 | 22.6863 | 22.2608 | 22.7499 | 22.8426 | NaN     | NaN     | NaN     | 23.4868 | 22.7978 | NaN                                                      | Q9Y666;A0A0U1R Q9Y666;A0A0U1R                          | Solute carrier fam SLC12A7  |  |
| 21.1885 | 22.3378 | 21.8737 | 22.0811 | 21.7982 | NaN     | NaN     | NaN     | NaN     | NaN     | 21.2815 | NaN     | NaN                                                      | Q9BXP2;Q9BXP2-Q9BXP2                                   | Solute carrier fam SLC12A9  |  |
| 23.3814 | NaN     | NaN     | 23.3317 | NaN                                                      | Q8N697 Q8N697                                          | Solute carrier fam SLC15A4  |  |
| 29.7686 | 28.453  | 29.3921 | 29.7261 | 28.4925 | 29.7492 | 28.9177 | 27.8535 | 28.5825 | 29.7188 | 29.0381 | 29.1597 | O15427;J3QQV2;J O15427                                   | Monocarboxylate SLC16A3                                |                             |  |
| 23.7372 | NaN     | 23.4815 | 23.1444 | NaN     | 23.5982 | NaN     | NaN     | NaN     | 22.883  | NaN     | NaN     | NaN                                                      | O60669;F8VS95;F O60669                                 | Monocarboxylate SLC16A7     |  |
| 23.0871 | NaN                                                      | Q9NRA2;Q9NRA2 Q9NRA2;Q9NRA2                            | Sialin SLC17A5              |  |
| 23.2947 | NaN     | 23.5629 | 23.6433 | NaN     | 23.5463 | NaN                                                      | O60779;O60779-2 O60779                                 | Thiamine transpoi SLC19A2   |  |
| 24.5142 | 23.5619 | 25.4431 | 24.744  | 24.0454 | 25.8131 | 23.5093 | 23.9693 | NaN     | 25.2478 | 24.4196 | 24.3431 | P43007;P43007-2 P43007;P43007-2                          | Neutral amino aci SLC1A4                               |                             |  |
| 30.7509 | 30.0362 | 30.7842 | 30.7764 | 30.0559 | 30.9606 | 30.3236 | 29.7961 | 30.2136 | 31.4253 | 30.7543 | 31.2175 | Q15758;MOQXM4 Q15758;MOQXM4                              | Neutral amino aci SLC1A5                               |                             |  |
| 24.5361 | 22.9789 | 24.2888 | 24.271  | 23.5359 | NaN     | 24.1013 | NaN     | NaN     | 25.0275 | 23.9899 | 23.4378 | Q8WUM9;H7BZK-Q8WUM9                                      | Sodium-depender SLC20A1                                |                             |  |
| 24.4851 | 24.5333 | 24.6418 | 24.4226 | 24.7224 | 25.1684 | 24.1166 | NaN     | NaN     | 24.3398 | 24.1618 | 24.8731 | Q08357 Q08357                                            | Sodium-depender SLC20A2                                |                             |  |
| NaN     | NaN     | 22.7996 | NaN     | NaN     | NaN     | NaN     | NaN     | 23.2136 | 23.4735 | 23.2613 | 23.6687 | Q9H015 Q9H015                                            | Solute carrier fam SLC22A4                             |                             |  |
| NaN     | NaN     | NaN     | 22.4018 | NaN                                                      | O76082;O76082-3 O76082;O76082-3                        | Solute carrier fam SLC22A5  |  |
| 23.3813 | 22.9699 | 23.5564 | 23.4626 | 23.2451 | 23.6272 | 23.7439 | NaN     | NaN     | 24.6739 | 23.6718 | NaN     | NaN                                                      | Q9UGH3;Q9UGH-Q9UGH3;Q9UGH                              | Solute carrier fam SLC23A2  |  |
| 24.5427 | 24.2696 | 24.5287 | 24.9485 | 24.1133 | 24.617  | 24.2654 | 25.0184 | 26.2364 | 22.5441 | NaN     | 24.3168 | P53007;B4DP62 P53007;B4DP62                              | Tricarboxylate tra SLC25A1                             |                             |  |
| 24.884  | 24.1842 | 24.1143 | 24.9726 | 23.7177 | 23.9997 | NaN     | NaN     | 26.1758 | NaN     | NaN     | NaN     | NaN                                                      | Q02978;J3L1P8;Q Q02978;J3L1P8;Q                        | Mitochondrial 2-o SLC25A11  |  |
| 23.5356 | 23.6543 | 23.4429 | 23.8803 | 24.1136 | 23.842  | NaN     | NaN     | 24.0438 | NaN     | NaN     | NaN     | NaN                                                      | Q9UJ50;Q9UJ50-2 Q9UJ50;Q9UJ50-2                        | Calcium-binding n SLC25A13  |  |
| 23.432  | NaN     | 23.1577 | 23.8057 | 23.2475 | NaN     | NaN     | NaN     | 24.2476 | NaN     | NaN     | NaN     | NaN                                                      | Q9H936;E9PJH7;E Q9H936;E9PJH7;E                        | Mitochondrial glu SLC25A22  |  |
| 26.8149 | 27.222  | 26.8335 | 27.2905 | 27.5795 | 27.0058 | 26.1321 | 27.2354 | 28.2764 | 25.2969 | 26.3616 | 27.0801 | Q6NUK1;Q6NUK1 Q6NUK1;Q6NUK1                              | Calcium-binding n SLC25A24                             |                             |  |
| 29.6427 | 29.5593 | 29.8955 | 30.3008 | 29.7645 | 30.0811 | 29.1074 | 29.5158 | 30.7666 | 28.5873 | 28.6784 | 29.6204 | Q00325;Q00325-Q00325;Q00325-2                            | Phosphate carrier SLC25A3                              |                             |  |
| 29.7889 | 29.1013 | 29.4514 | 30.0033 | 29.39   | 29.6291 | 29.1977 | 29.6254 | 30.6018 | 28.0774 | 28.5435 | 29.2691 | P05141;Q9H0C2 P05141                                     | ADP/ATP transloc SLC25A5                               |                             |  |
| 26.4765 | 26.2804 | 26.2012 | 26.6792 | 26.1306 | 25.825  | 25.6683 | 25.6145 | 27.3039 | 24.2967 | 24.8729 | 25.7573 | P12236 P12236                                            | ADP/ATP transloc SLC25A6                               |                             |  |
| 24.7651 | 24.9761 | 25.7497 | 25.1618 | 25.3938 | 25.8551 | NaN     | NaN     | NaN     | 26.4975 | 26.3954 | NaN     | NaN                                                      | P50443;C9JAN6 P50443                                   | Sulfate transporte SLC26A2  |  |
| 23.9082 | 23.9998 | 24.8584 | 24.459  | 24.6098 | 25.0845 | 24.2138 | NaN     | 24.1328 | 25.6794 | 24.8714 | 25.2486 | Q9BXS9-3;G3XAC-Q9BXS9-3;G3XAC                            | Solute carrier fam SLC26A6                             |                             |  |
| NaN     | NaN     | NaN     | 21.8809 | NaN                                                      | Q9BXS9;Q9BXS9-Q9BXS9;Q9BXS9-                           | Solute carrier fam SLC26A6  |  |
| 20.929  | NaN     | 21.466  | 21.2216 | 21.1976 | Q6P1M0;Q6P1M Q6P1M0;Q6P1M0                               | Long-chain fatty a SLC27A4                             |                             |  |
| 28.1186 | 27.3862 | 28.631  | 28.559  | 27.3118 | 28.8342 | 28.4455 | 27.2108 | 26.9327 | 29.9954 | 28.799  | 28.1467 | Q99808;Q99808-Q99808;Q99808-2                            | Equilibrative nucle SLC29A1                            |                             |  |
| 23.1726 | NaN     | 23.1495 | 23.0338 | NaN     | 23.0139 | NaN     | NaN     | NaN     | 23.9912 | NaN     | NaN     | NaN                                                      | Q14542;Q14542-Q14542;Q14542-2                          | Equilibrative nuck SLC29A2  |  |
| 30.6026 | 30.2845 | 31.1086 | 31.115  | 30.5694 | 31.6286 | 30.2437 | 30.0456 | 30.733  | 31.6861 | 31.2817 | 31.156  | P11166;A6NL68;A P11166                                   | Solute carrier fam SLC2A1                              |                             |  |
| 27.2485 | 27.2284 | 27.7508 | 27.7169 | 27.6118 | 27.9705 | 27.9407 | 27.1262 | 28.2671 | 28.4969 | 27.9979 | 28.2277 | P11169;Q8TDB8;C P11169;Q8TDB8;C                          | Solute carrier fam SLC2A3;SLC2A14                      |                             |  |
| 21.4793 | 21.7411 | 21.5227 | NaN     | NaN     | NaN     | NaN     | NaN     | 22.9248 | 21.8416 | NaN     | 23.2425 | Q9UGQ3;Q9UGQ Q9UGQ3;Q9UGQ                                | Solute carrier fam SLC2A6                              |                             |  |
| 22.4285 | 22.5913 | 22.9841 | 23.27   | 23.2173 | NaN     | 23.2864 | NaN     | NaN     | 23.801  | 24.1684 | 23.929  | Q9Y6M5 Q9Y6M5                                            | Zinc transporter 1 SLC30A1                             |                             |  |
| 25.2557 | 24.9604 | 25.7123 | 25.7764 | 24.437  | 25.752  | 24.8185 | NaN     | NaN     | NaN     | NaN     | 25.0468 | Q8NEW0;HOY362 Q8NEW0;HOY362                              | Zinc transporter 7 SLC30A7                             |                             |  |
| NaN     | 25.8662 | 25.2435 | NaN     | NaN                                                      | O15431 O15431                                          | High affinity copp SLC31A1  |  |
| NaN     | NaN     | NaN     | 21.5119 | 21.653  | 22.1211 | NaN                                                      | L0R6Q1 L0R6Q1                                          | SLC35A4                     |  |
| 25.0236 | 24.6875 | 25.1122 | 24.9954 | 24.2075 | 24.8433 | 24.6014 | NaN     | NaN     | 24.9947 | 23.7283 | NaN     | NaN                                                      | Q8TB61;Q8TB61-Q8TB61;Q8TB61-                           | Adenosine 3-phos SLC35B2    |  |
| 24.304  | 23.5683 | 24.1295 | 24.378  | 23.6154 | 23.6992 | NaN     | NaN     | NaN     | 23.4114 | NaN     | NaN     | NaN                                                      | Q96K37;H7C10;Q Q96K37;H7C10                            | Solute carrier fam SLC35E1  |  |
| 21.634  | NaN     | NaN     | 21.925  | NaN                                                      | Q8IXU6;E9PJD1;Q Q8IXU6;E9PJD1;Q                        | Solute carrier fam SLC35F2  |  |
| 26.6951 | 25.1273 | 25.1843 | 25.6885 | 24.6235 | 25.2328 | NaN     | NaN     | NaN     | 24.9173 | 24.8917 | NaN     | NaN                                                      | Q8N357;F8WCT7 Q8N357                                   | Solute carrier fam SLC35F6  |  |
| 23.2726 | 22.6923 | 23.3848 | 23.0823 | 22.4008 | NaN     | NaN     | 22.7751 | NaN     | 23.5135 | 22.9224 | NaN     | NaN                                                      | Q43826;U3KPU7;I Q43826;U3KPU7;I                        | Glucose-6-phosph SLC37A4    |  |
| 27.3957 | 26.877  | 27.2725 | 27.0885 | 27.9118 | 27.1641 | 27.5568 | 28.1958 | 27.7006 | 27.3021 | 27.3109 | 28.3317 | Q9H2H9;F8VX04;I Q9H2H9;F8VX04;I                          | Sodium-coupled n SLC38A1                               |                             |  |
| 27.5273 | 27.2695 | 27.3527 | 27.2881 | 26.6564 | 26.9348 | 27.3121 | 26.9129 | 27.8127 | 27.1775 | 26.0634 | 27.616  | Q96QD8;F8VUY8; Q96QD8;F8VUY8                             | Sodium-coupled n SLC38A2                               |                             |  |
| 26.8702 | 27.61   | 27.4884 | 26.5223 | 27.2167 | 27.2685 | 29.3876 | 27.9295 | 27.3322 | 27.1433 | 26.0095 | 25.9145 | Q9ULF5;E7ENT5;E Q9ULF5                                   | Zinc transporter Z SLC39A10                            |                             |  |
| 26.2899 | 25.1539 | 25.4929 | 25.983  | 24.7741 | 25.1552 | 26.9277 | 23.2406 | 26.0615 | 27.6291 | 27.2354 | NaN     | NaN                                                      | Q15043;Q15043-Q15043;Q15043-2                          | Zinc transporter Z SLC39A14 |  |
| 24.568  | 25.2528 | 24.9378 | 24.0434 | 24.4145 | 24.6998 | 25.1023 | 24.6149 | NaN     | 24.958  | 23.8597 | NaN     | NaN                                                      | Q13433;K7EQ91;C Q13433                                 | Zinc transporter Z SLC39A6  |  |
| 26.7986 | 23.5735 | 25.3166 | 26.3033 | 24.0056 | 24.2458 | NaN     | NaN     | NaN     | 25.5678 | 24.0828 | NaN     | NaN                                                      | Q92504;A0A087W Q92504;A0A087W                          | Zinc transporter S SLC39A7  |  |
| 32.798  | 32.1526 | 32.8981 | 32.9188 | 32.4025 | 33.1655 | 32.5153 | 31.6142 | 32.1801 | 33.2629 | 32.7939 | 32.7525 | P08195-2;P08195 P08195-2;P08195                          | 4F2 cell-surface ar SLC3A2                             |                             |  |
| NaN     | NaN     | NaN     | 22.7042 | 22.273  | NaN                                                      | Q8IVJ1 Q8IVJ1                                          | Solute carrier fam SLC41A1  |  |
| 22.3646 | NaN     | 22.8602 | 22.618  | NaN     | 23.1829 | NaN     | NaN     | NaN     | 23.2509 | 22.7899 | 22.7947 | O75387;E9PJ68;O O75387;E9PJ68;O                          | Large neutral amii SLC43A1                             |                             |  |
| 28.5526 | 28.2786 | 29.3923 | 28.917  | 28.1923 | 29.7084 | 28.6174 | 27.47   | 28.7681 | 29.7727 | 29.4495 | 29.0279 | Q8NBIS;Q8NBIS-2 Q8NBIS;Q8NBIS-2                          | Solute carrier fam SLC43A3                             |                             |  |
| 25.3282 | 25.0696 | 25.9258 | 25.4043 | 24.9019 | 26.0533 | 25.6793 | 24.8667 | 25.7154 | 25.9438 | 25.2019 | 26.0432 | Q8WWI5;Q8WWI Q8WWI5;Q8WWI                                | Choline transport SLC44A1                              |                             |  |



|         |         |         |         |         |         |         |         |         |         |         |         |                                                   |                                                     |                                                  |                   |         |
|---------|---------|---------|---------|---------|---------|---------|---------|---------|---------|---------|---------|---------------------------------------------------|-----------------------------------------------------|--------------------------------------------------|-------------------|---------|
| 26.427  | 25.9707 | 27.2338 | 27.316  | 26.1417 | 27.4143 | 25.4464 | NaN     | NaN     |         | 26.8502 | 26.0053 | 25.1833                                           | Q8IWA5;Q8IWA5-Q8IWA5;Q8IWA5- Choline transport      | SLC44A2                                          |                   |         |
| 23.9788 | 23.4397 | 23.8121 | 23.7975 | 23.4732 | 24.057  | NaN     | NaN     |         | 23.85   | 24.1608 | NaN     | 24.1733                                           | Q96NT5;Q96NT5-Q96NT5;Q96NT5- Proton-coupled fo      | SLC46A1                                          |                   |         |
| 22.5484 | NaN     | 21.9676 | 22.7701 | 22.983  | 22.4724 | NaN     | NaN     | NaN     |         | 22.1974 | 22.84   | 23.2731                                           | Q9BWU0;A0A087-Q9BWU0;A0A087- Kanadaptin             | SLC4A1AP                                         |                   |         |
| 22.4816 | 23.5489 | 23.4762 | 23.719  | 23.2213 | NaN     | NaN     | NaN     |         | 25.5777 | 24.9595 | 24.8184 | 25.7857                                           | P04920;J3KNG9;P P04920;J3KNG9;P Anion exchange p    | SLC4A2                                           |                   |         |
| 26.9016 | 26.8442 | 27.459  | 27.3929 | 26.9328 | 27.5595 | 27.3577 | 26.1037 | 27.0892 | 27.9602 | 27.2547 | 27.4862 | Q9Y6M7-6;Q9Y6-Q9Y6M7-6;Q9Y6 Sodium bicarbona      | SLC4A7                                              |                                                  |                   |         |
| 24.5778 | NaN     | 23.964  | 24.4093 | NaN     | 25.2704 | 25.772  | NaN     | NaN     |         | 25.8184 | 25.3472 | 25.3479                                           | P53794 P53794                                       | Sodium/myo-inos                                  | SLC5A3            |         |
| 25.9658 | 24.9656 | 25.7961 | 26.0644 | 25.182  | 26.0648 | 25.8083 | NaN     |         | 25.5117 | 26.7316 | 26.0219 | 25.9655                                           | Q9Y289                                              | Q9Y289                                           | Sodium-depender   | SLC5A6  |
| 24.2476 | 24.1386 | 24.8775 | 24.3087 | 24.3897 | 24.7005 | 25.1254 | NaN     |         | 25.7644 | 25.9051 | 25.3104 | 26.0126                                           | P31641;A0A087W-P31641;A0A087W Sodium- and chlor     | SLC6A6                                           |                   |         |
| 27.2056 | 26.6058 | 27.5203 | 27.3815 | 26.102  | 27.2965 | 26.8423 | 26.2725 | 26.3922 | 27.0697 | 26.1928 | 26.2101 | P30825;Q5JR49-P30825                              |                                                     | High affinity catio                              | SLC7A1            |         |
| 27.5239 | 27.9556 | 28.2559 | 28.4679 | 28.0954 | 28.3642 | 27.4584 | 27.3235 | 27.8176 | 28.482  | 28.3454 | 28.2025 | Q9UPY5;H0Y9F9-Q9UPY5                              |                                                     | Cystine/glutamat                                 | SLC7A11           |         |
| 26.4385 | 25.3367 | 26.0653 | 25.4312 | 25.4154 | 25.2835 | 25.5493 | NaN     |         | 26.3164 | 23.8224 | NaN     | NaN                                               | P52569;P52569-3;P52569;P52569-3; Cationic amino ac  | SLC7A2                                           |                   |         |
| 30.2359 | 29.3732 | 30.8704 | 30.5666 | 30.0287 | 31.0327 | 29.7977 | 29.1176 | 29.7245 | 30.9717 | 30.6645 | 30.4317 | Q01650;A0A0C4D-Q01650                             |                                                     | Large neutral amio                               | SLC7A5            |         |
| 24.2005 | 23.7261 | 24.7417 | 24.6604 | 24.3458 | 24.8096 | 24.1027 | NaN     |         | 24.4147 | 25.1962 | 24.6984 | NaN                                               | Q92536;H3BSB6;† Q92536                              |                                                  | Y+L amino acid tr | SLC7A6  |
| NaN                                               | 22.7792                                             | Q96CW6;J3L451;A Q96CW6;J3L451;A Probable RNA pol | SLC7A6OS          |         |
| 23.2106 | 23.225  | 23.999  | 23.2953 | 24.0464 | 23.7588 | 22.9846 | NaN     |         | NaN     |         | 23.8852 | 23.7304                                           | 24.1316                                             | P19634 P19634                                    | Sodium/hydrogen   | SLC9A1  |
| 28.4326 | 29.3903 | 29.7742 | 28.9066 | 29.4741 | 30.1383 | 28.5648 | 27.8842 | 27.5935 | 30.3366 | 29.4706 | 28.8881 | O14745;J3QRP6;C O14745;J3QRP6                     | Na(+)/H(+) exchar                                   | SLC9A3R1                                         |                   |         |
| 28.7916 | 29.8874 | 29.414  | 28.699  | 29.5952 | 29.6013 | 29.1117 | 28.8673 | 28.8787 | 29.8899 | 29.6946 | 29.4714 | Q15599;H3BQ50;I Q15599;H3BQ50                     | Na(+)/H(+) exchar                                   | SLC9A3R2                                         |                   |         |
| 23.9195 | 24.9209 | 24.2468 | 23.7859 | 24.6568 | 24.4669 | 23.6855 | NaN     | NaN     |         | 24.0807 | 24.3803 | NaN                                               | Q15599-2                                            | Na(+)/H(+) exchar                                | SLC9A3R2          |         |
| 25.7816 | 27.5868 | 26.9662 | 26.2116 | 27.2362 | 27.0724 | 26.9533 | 27.0217 | 26.3628 | 27.0407 | 27.3259 | 27.2662 | Q15599-3;H3BN5-Q15599-3;H3BN5 Na(+)/H(+) exchar   | SLC9A3R2                                            |                                                  |                   |         |
| 23.7352 | NaN     | 23.9201 | 23.9308 | NaN     | 24.2195 | NaN     | NaN     | NaN     | NaN     | NaN     | 23.1984 | NaN                                               | Q92581-2;Q92581-Q92581-2;Q92581 Sodium/hydrogen     | SLC9A6                                           |                   |         |
| 23.05   | NaN     | 23.1613 | 23.3438 | NaN     | NaN     | NaN     | NaN     | NaN     | NaN     |         | 22.7912 | NaN                                               | NaN                                                 | Q96T83;A0A087W-Q96T83;A0A087W Sodium/hydrogen    | SLC9A7            |         |
| 26.75   | 26.8663 | 26.0383 | 26.8898 | 26.8018 | 26.2219 | 25.3561 | 25.6255 | 25.4122 | 25.3505 | 25.4014 | 25.0002 | Q9GZT3;Q9GZT3-Q9GZT3;Q9GZT3- SRA stem-loop-int    | SLURP                                               |                                                  |                   |         |
| 27.7813 | 28.0794 | 28.0295 | 27.9421 | 28.1488 | 28.1936 | 28.4301 | 28.5482 | 28.5534 | 28.5044 | 28.5256 | 28.5344 | Q9H2G2;Q9H2G2-Q9H2G2;Q9H2G2 STE20-like serine/    | SLK                                                 |                                                  |                   |         |
| 23.4429 | 23.5377 | 23.2765 | 23.3791 | 23.7346 | 23.67   | NaN     | 23.9496 | NaN     | 23.0646 | 23.56   | 23.5544 | Q9NWH9;H7C3F4-Q9NWH9;H7C3F4                       | SAFB-like transcrip                                 | SLTM                                             |                   |         |
| NaN     | NaN     | 21.909  | NaN                                               | Q95391                                              | Q95391                                           | Pre-mRNA-splicing | SLU7    |
| 24.8195 | 23.6031 | 24.1319 | 24.3473 | 23.5686 | 24.1398 | 23.3545 | NaN     | NaN     | 23.8331 | 23.6784 | NaN     |                                                   | P84022;P84022-3;P84022;P84022-3; Mothers against c  | SMAD3                                            |                   |         |
| 23.6781 | 23.4605 | 24.1301 | 23.155  | 23.5121 | 23.388  | NaN                                               | Q99717;Q15797;† Q99717;Q15797;† Mothers against c   | SMAD5;SMAD1                                      |                   |         |
| 24.1029 | 24.6867 | 24.5567 | 23.8488 | 24.4686 | 24.2734 | NaN     | NaN     | NaN     | NaN     | 23.7242 | 24.1049 | 24.3843                                           | O00193;E9PM92;† O00193;E9PM92;† Small acidic prote  | SMAP;C11orf58                                    |                   |         |
| 22.942  | NaN     | 22.6939 | 22.6065 | NaN     | 22.6014 | NaN                                               | Q8IYB5;Q8IYB5-3;Q8IYB5;Q8IYB5-3; Stromal membran    | SMAP1                                            |                   |         |
| 25.2973 | 24.281  | 24.9081 | 25.4242 | 24.4704 | 25.1531 | NaN     | NaN     | NaN     | NaN     | 24.4749 | 25.1434 | 24.3094                                           | P51532;Q9HBD4;† P51532;Q9HBD4;† Transcription acti  | SMARCA4                                          |                   |         |
| 27.0594 | 25.8954 | 26.2027 | 27.2376 | 26.3881 | 26.3324 | 25.583  | 26.5975 | 25.4109 | 26.7709 | 26.8263 | 26.1463 | O60264                                            | O60264                                              | SWI/SNF-related                                  | SMARCA5           |         |
| 23.2215 | 22.0468 | 22.321  | 23.8886 | NaN     | 22.6611 | NaN     | NaN     | NaN     | NaN     | 23.4956 | NaN     | NaN                                               | Q9H4L7;Q9H4L7-;Q9H4L7;Q9H4L7- SWI/SNF-related       | SMARCD1                                          |                   |         |
| 22.3511 | NaN                                               | Q92922;F8WE13-Q92922                                |                                                  | SWI/SNF complex   | SMARCC1 |
| 24.9917 | 23.936  | 24.7177 | 24.9558 | 24.975  | 23.8386 | 25.9892 | 26.6792 | NaN     | 25.2216 | 25.0855 | 25.1911 | Q8TAQ2;Q8TAQ2-Q8TAQ2;Q8TAQ2- SWI/SNF complex      | SMARCC2                                             |                                                  |                   |         |
| 24.7648 | 24.3363 | 24.6688 | 25.0419 | 24.8122 | 24.6477 | NaN     | NaN     | NaN     | 24.0096 | 24.5599 | 24.8809 | 24.2277                                           | Q92925;J3KMX2;† Q92925;J3KMX2;† SWI/SNF-related     | SMARCD2                                          |                   |         |
| NaN                                               | 20.5312                                             | Q6STES;Q6STES-2 Q6STES;Q6STES-2 SWI/SNF-related  | r                 | SMARCD3 |
| 24.1773 | NaN     | 23.8004 | 24.5881 | 23.9196 | 24.2148 | NaN     | NaN     | NaN     | NaN     | 23.7988 | 24.0639 | 23.9284                                           | Q969G3;J3QK57;† Q969G3;J3QK57;† SWI/SNF-related     | r                                                | SMARCE1           |         |
| 28.713  | 27.9002 | 28.1931 | 28.6863 | 28.5373 | 28.6197 | 27.1951 | 27.5655 | 26.1201 | 28.5573 | 28.6592 | 28.0236 | Q14683;G8JLG1;† Q14683;G8JLG1                     |                                                     | Structural mainte                                | SMC1A             |         |
| 29.551  | 28.6839 | 28.8445 | 29.4769 | 28.9168 | 28.9322 | 28.385  | 28.4226 | 27.8709 | 29.3493 | 28.9511 | 28.386  | O95347;O95347-2 O95347;O95347-2 Structural mainte | SMC2                                                |                                                  |                   |         |
| 30.4693 | 30.3145 | 30.4424 | 30.3563 | 30.3644 | 30.4476 | 29.3844 | 30.0492 | 29.2385 | 30.0181 | 29.9442 | 29.866  | Q9UQE7                                            | Q9UQE7                                              | Structural mainte                                | SMC3              |         |
| 29.7943 | 28.768  | 28.918  | 29.4657 | 28.9649 | 29.057  | 28.7818 | 29.4064 | 28.546  | 29.2678 | 29.1832 | 28.5999 | Q9NTJ3;E9PD53;C Q9NTJ3;E9PD53;C Structural mainte | SMC4                                                |                                                  |                   |         |
| 23.1656 | NaN     | 22.7827 | 23.5608 | NaN     | 22.8385 | NaN                                               | Q8IY18                                              | Q8IY18                                           | Structural mainte | SMC5    |
| 22.7847 | NaN     | NaN     | 22.8282 | NaN                                               | Q965B8;Q965B8-;Q965B8;Q965B8-2 Structural mainte    | SMC6                                             |                   |         |
| 28.5798 | 27.1948 | 27.5091 | 28.4345 | 27.9205 | 27.6608 | 24.9651 | 24.096  | 25.4999 | 27.5368 | 27.5583 | 25.3672 | A6NHR9;A6NHR9-A6NHR9;A6NHR9- Structural mainte    | SMCHD1                                              |                                                  |                   |         |
| 19.5419 | NaN                                               | Q8TEV9;Q8TEV9-;Q8TEV9;Q8TEV9-2 Smith-Magenis sy     | SMCR8                                            |                   |         |
| 25.1619 | 24.6778 | 24.5588 | 25.1904 | 24.9801 | 24.9687 | NaN     | NaN     | NaN     | 24.3008 | 25.7804 | 27.3729 | Q6IN85;G3V5Z3;C Q6IN85;G3V5Z3;C Serine/threonine- | SMEK1                                               |                                                  |                   |         |
| 27.5126 | 25.9293 | 26.5496 | 26.7469 | 25.9472 | 25.819  | 25.416  | 25.5788 | NaN     | 24.2306 | 25.2842 | NaN     | NaN                                               | J3KRA9;Q96Q15;† J3KRA9;Q96Q15;† C Serine/threonine- | SMG1                                             |                   |         |
| 22.5074 | NaN                                               | Q86U58;Q86U58-Q86U58;Q86U58- Telomerase-bindin      | SMG6                                             |                   |         |
| 24.9585 | 22.591  | 23.6629 | 24.5412 | 23.687  | 22.9486 | NaN     | NaN     | NaN     | 22.94   | 23.6638 | NaN     | NaN                                               | Q8ND04;Q8ND04-Q8ND04;Q8ND04- Protein                | SMG8                                             | SMG8              |         |
| 24.9228 | 24.0455 | 24.8445 | 24.5733 | 24.2743 | 24.4603 | 23.8393 | NaN     | 23.9822 | 24.0765 | 23.982  | NaN     | NaN                                               | Q9H0W8;Q9H0W-Q9H0W8;Q9H0W- Protein                  | SMG9                                             | SMG9              |         |
| 20.9661 | NaN                                               | B2RUZ4;H3BS66-B2RUZ4;H3BS66 Small integral me       | SMIM1                                            |                   |         |
| 27.1419 | 25.601  | 26.1716 | 27.206  | 25.4263 | 25.9312 | 24.4479 | NaN     | NaN     | 25.1692 | 25.449  | 23.3546 | Q16637;E7EQ24;C Q16637;E7EQ24;C Survival motor ne | SMN1;SMN2                                           |                                                  |                   |         |
| 28.9455 | 29.29   | 29.1166 | 28.5206 | 29.2456 | 28.8395 | 29.3449 | 29.3162 | 29.3368 | 28.8823 | 29.2535 | 29.3551 | P52788;H7C2R7;P P52788;H7C2R7;P Spermine synthas  | SMS                                                 |                                                  |                   |         |
| 25.792  | 26.0527 | 26.5474 | 26.4845 | 26.9154 | 26.5866 | 25.766  | 25.8948 | 25.7383 | 26.503  | 26.7317 | 27.1953 | P53814-5;P53814-P53814-5;P53814- Smoothelin       | SMTN                                                |                                                  |                   |         |
| 25.239  | 24.8572 | 25.0151 | 25.5046 | 25.0871 | 25.6074 | 24.333  | 24.3157 | 24.1218 | 25.7021 | 25.5499 | 25.4569 | Q2TAY7;Q2TAY7-;Q2TAY7;Q2TAY7- WD40 repeat-con     | SMU1                                                |                                                  |                   |         |
| 25.1266 | 24.1076 | 24.6251 | 24.7721 | NaN     | 24.6101 | NaN     | NaN     | NaN     | 24.518  | 24.399  | NaN     | NaN                                               | Q9HAU4;J3QQM4-Q9HAU4;J3QQM4 E3 ubiquitin-prote      | SMURF2                                           |                   |         |
| 22.694  | NaN     | NaN     | 23.0279 | NaN     | NaN     | NaN     | NaN     | NaN     | 23.1765 | 23.1531 | NaN     | NaN                                               | Q9NRG4;B0R0U3;Q9NRG4                                |                                                  | N-lysine methyltr | SMYD2   |
| 24.8873 | 24.5745 | 24.3252 | 25.1608 | 24.6131 | 24.567  | NaN     | NaN     | NaN     | 23.3329 | 24.2966 | 24.6502 | NaN                                               | Q9H7B4;Q9H7B4-Q9H7B4;Q9H7B4- Histone-lysine N-      | SMYD3                                            |                   |         |
| NaN     | NaN     | NaN     | 22.8502 | NaN                                               | Q6GMV2;E2QRN5-Q6GMV2                                |                                                  | SET and MYND do   | SMYD5   |
| 27.7102 | 27.7087 | 27.9079 | 27.3371 | 27.4299 | 27.9692 | 26.9993 | 27.0309 | 27.7376 | 27.6061 | 27.1504 | 27.8978 | O00161;O00161-2 O00161;O00161-2 Synapto           | SNAP23                                              |                                                  |                   |         |



|         |         |         |         |         |         |         |         |         |         |         |         |                   |                 |                                   |                           |
|---------|---------|---------|---------|---------|---------|---------|---------|---------|---------|---------|---------|-------------------|-----------------|-----------------------------------|---------------------------|
| 25.0198 | 26.0311 | 25.5283 | 24.1892 | 25.5592 | 25.3774 | 25.4677 | 24.6564 | 25.3997 | 24.8839 | 24.5584 | 25.513  | Q95721;C9JAF7     | Q95721;C9JAF7   | Synaptosomal-ass SNAP29           |                           |
| NaN     | NaN     | NaN     | 21.4119 | NaN     | NaN     | NaN     | NaN     | NaN     | NaN     | 21.9892 | NaN     | Q16533            | Q16533          | snRNA-activating SNAPC1           |                           |
| 23.0274 | 23.3141 | 22.7209 | 22.7453 | 22.9363 | 22.3893 | NaN     | NaN     | NaN     | 22.2086 | 22.7496 | NaN     | O95295            | O95295          | SNARE-associated SNAPIN           |                           |
| 30.1967 | 29.9087 | 29.9167 | 30.137  | 29.9488 | 29.9805 | 29.4156 | 29.7882 | 29.646  | 29.7447 | 29.8473 | 29.9435 | Q7KZF4;H7C597     | Q7KZF4          | Staphylococcal nu SND1            |                           |
| 23.9645 | 24.1765 | 24.1016 | 23.6321 | 24.0161 | NaN     | 24.2086 | NaN     | NaN     | NaN     | 24.5446 | 24.6645 | Q96H20;Q96H20     | Q96H20;Q96H20   | Vacuolar-sorting f SNF8           |                           |
| 29.0839 | 27.8476 | 28.7066 | 29.2232 | 28.3555 | 28.7499 | 27.9396 | 27.6407 | 26.7571 | 28.7164 | 28.5662 | 28.3013 | O75643;B4E0P5;C   | O75643          | U5 small nuclear r SNRNP200       |                           |
| 22.1144 | NaN     | NaN     | 22.387  | NaN     | Q8WVK2;B8ZZ98     | Q8WVK2;B8ZZ98   | U4/U6.U5 small n SNRNP27          |                           |
| 27.4051 | 26.0221 | 25.9659 | 26.5757 | 25.9324 | 25.7824 | 25.2638 | NaN     | 24.1385 | 26.9618 | 26.669  | 25.0868 | Q96DI7;Q96DI7-2   | Q96DI7;Q96DI7-2 | U5 small nuclear r SNRNP40;DKFZp4 |                           |
| 28.7915 | 28.2453 | 28.5691 | 28.8606 | 28.813  | 28.8249 | 28.1792 | 29.4529 | 27.5748 | 29.1772 | 29.5793 | 29.2993 | P08621;P08621-2   | P08621;P08621-2 | U1 small nuclear r SNRNP70        |                           |
| 25.8439 | 26.5745 | 25.5657 | 25.9167 | 26.6326 | 25.8685 | NaN     | 25.8964 | 24.9389 | 25.445  | 26.7876 | 26.3731 | P09012;MOQZG7;    | P09012;MOQZG7;  | U1 small nuclear r SNRPA          |                           |
| 27.5043 | 26.7007 | 26.8407 | 27.9259 | 27.0784 | 26.9584 | 25.5227 | 24.8239 | 24.6777 | 27.2396 | 27.7054 | 26.1791 | P09661;HOYMAO;    | P09661;HOYMAO;  | U2 small nuclear r SNRPA1         |                           |
| 28.4465 | 27.9863 | 28.0756 | 28.7163 | 28.3499 | 28.5194 | 27.6413 | 28.0899 | 27.7684 | 28.2915 | 28.735  | 28.612  | P14678;P14678-2   | P14678;P14678-2 | Small nuclear ribo SNRPB;SNRPN    |                           |
| 26.895  | 25.1897 | 25.2741 | 27.2293 | 25.3805 | 25.8166 | 23.8671 | 24.5929 | NaN     | 26.9033 | 25.4308 | 24.6619 | P08579            | P08579          | U2 small nuclear r SNRPB2         |                           |
| 22.8582 | 23.1363 | NaN     | 22.6239 | 22.3443 | 22.5589 | NaN     | NaN     | NaN     | NaN     | NaN     | NaN     | P09234;AOA0A0N    | P09234;AOA0A0M  | U1 small nuclear r SNRPC          |                           |
| 29.3893 | 28.0638 | 28.7443 | 29.4177 | 28.4197 | 29.0603 | 27.8701 | 27.775  | 27.5169 | 29.4382 | 29.244  | 28.7874 | P62314;J3QLI9;J3i | P62314;J3QLI9   | Small nuclear ribo SNRPD1         |                           |
| 29.5236 | 27.949  | 28.2876 | 28.9036 | 28.1183 | 28.2274 | 27.532  | 28.0847 | 27.8613 | 28.2603 | 29.009  | 28.1971 | P62316;P62316-2   | P62316;P62316-2 | Small nuclear ribo SNRPD2         |                           |
| 27.2943 | 27.7455 | 27.4529 | 27.9932 | 27.9098 | 27.6136 | 26.5872 | 28.2388 | 27.8713 | 26.7438 | 28.2731 | 29.0211 | P62318;P62318-2   | P62318;P62318-2 | Small nuclear ribo SNRPD3         |                           |
| 27.6889 | 27.3814 | 27.379  | 27.7421 | 27.6395 | 27.6803 | 25.9602 | 27.2332 | 27.1779 | 27.0357 | 27.7838 | 27.8264 | P62304;A6NHK2     | P62304          | Small nuclear ribo SNRPE          |                           |
| 28.1852 | 27.8056 | 27.9506 | 28.4475 | 28.0829 | 28.168  | 26.7155 | 27.8321 | 27.0647 | 28.3192 | 28.4957 | 27.7352 | P62306;AOA0B4J2   | P62306;AOA0B4J2 | Small nuclear ribo SNRPF          |                           |
| 27.2023 | 27.8974 | 27.1016 | 26.8066 | 28.3489 | 27.0331 | 27.2411 | 28.4321 | 27.5777 | 27.1679 | 28.0784 | 28.6064 | P62308;A8MWD9     | P62308;A8MWD9   | Small nuclear ribo SNRPG;SNRPGP15 |                           |
| 23.5606 | 24.6951 | 24.9903 | 23.8617 | 24.9256 | 25.3304 | 24.0591 | NaN     | NaN     | 25.2824 | 24.945  | 25.3161 | Q13884;Q13884-1   | Q13884;Q13884-1 | Beta-1-syntrophin SNTB1           |                           |
| 26.9611 | 26.9387 | 27.5978 | 27.3018 | 27.3196 | 27.7979 | 27.7683 | 27.4256 | 27.189  | 29.0292 | 28.4921 | 28.2238 | Q13425;Q13425-1   | Q13425;Q13425-2 | Beta-2-syntrophin SNTB2           |                           |
| 23.8726 | 23.3872 | 23.6476 | 23.6524 | 24.0047 | NaN     | NaN     | NaN     | NaN     | 24.1021 | 24.868  | NaN     | O95149;H3BUB4;    | O95149;H3BUB4;  | Snurportin-1 SNUPN                |                           |
| 24.7408 | 25.2812 | 25.0345 | 24.8907 | 25.468  | 25.4316 | 24.2693 | 24.7659 | NaN     | 24.6239 | 24.9229 | NaN     | Q13573;G3V4X8;    | Q13573;G3V4X8;  | SNW domain-conf SNW1              |                           |
| 25.759  | 26.2113 | 25.8527 | 25.6131 | 26.1363 | 25.9194 | 25.8495 | 26.3416 | 26.3042 | 25.7105 | 25.9899 | 26.2628 | Q13596;Q13596-1   | Q13596;Q13596-2 | Sorting nexin-1 SNX1              |                           |
| 20.3137 | NaN     | Q9Y5W9;J3QR89;    | Q9Y5W9;J3QR89;  | Sorting nexin-11 SNX11            |                           |
| 24.1268 | 25.2256 | 24.2666 | 24.4486 | 24.3915 | 23.9559 | 24.8406 | 24.0149 | 24.8763 | 24.4692 | 24.3984 | 24.9969 | Q9UMY4;AOA087;    | Q9UMY4;AOA087;  | Sorting nexin-12 SNX12            |                           |
| 22.7312 | 23.4303 | 22.7355 | 22.5392 | 22.8796 | 22.808  | NaN     | NaN     | NaN     | NaN     | 22.3879 | NaN     | Q9NRS6;E9PK26;    | Q9NRS6;E9PK26;  | Sorting nexin-15 SNX15            |                           |
| 25.7221 | 25.9067 | 25.1069 | 25.3959 | 24.992  | 25.0201 | 24.4874 | NaN     | 25.7165 | 24.5541 | 24.7738 | NaN     | Q15036;Q15036-1   | Q15036;Q15036-2 | Sorting nexin-17 SNX17            |                           |
| 23.5479 | 23.7966 | 23.943  | 23.4114 | 23.6607 | 23.6457 | 23.6433 | NaN     | NaN     | 23.3574 | 23.4616 | 23.994  | Q96RF0-2;Q96RF    | Q96RF0-2;Q96RF  | Sorting nexin-18 SNX18            |                           |
| 27.6497 | 28.2328 | 27.8791 | 27.4832 | 28.1967 | 27.7682 | 27.7193 | 28.0411 | 28.0241 | 27.5101 | 27.6749 | 28.1654 | O60749;D6RC15     | O60749          | Sorting nexin-2 SNX2              |                           |
| 23.9359 | 23.9805 | 23.7999 | 23.7428 | 23.4356 | 23.7454 | NaN     | NaN     | NaN     | 23.4423 | 23.2966 | NaN     | Q96L92;Q96L92-3   | Q96L92;Q96L92-3 | Sorting nexin-27 SNX27            |                           |
| 28.1745 | 28.9838 | 28.2082 | 27.8715 | 28.1794 | 27.7071 | 28.0169 | 28.18   | 28.723  | 27.4564 | 27.5624 | 28.1385 | O60493;O60493-1   | O60493;O60493-2 | Sorting nexin-3 SNX3              |                           |
| 25.67   | 25.1151 | 25.4681 | 25.3396 | 24.8179 | 25.2531 | 25.3816 | 25.5102 | 25.4692 | 24.7233 | 24.8658 | 25.1534 | Q8WV41;H3BPR3     | Q8WV41;H3BPR3   | Sorting nexin-33 SNX33            |                           |
| 22.3478 | 22.0899 | 22.2251 | 22.5471 | 22.4231 | 22.1663 | NaN     | NaN     | NaN     | 21.9462 | 21.8175 | NaN     | O95219;F8W9T3;    | O95219;F8W9T3;  | Sorting nexin-4 SNX4              |                           |
| 24.9528 | 25.0776 | 24.9697 | 24.8962 | 25.2186 | 24.9259 | 26.1838 | 25.8721 | 25.7197 | 25.5227 | 25.8061 | 26.1329 | Q9Y5X3;Q5QPE5;    | Q9Y5X3;Q5QPE5   | Sorting nexin-5 SNX5              |                           |
| 27.4888 | 28.4462 | 27.8519 | 27.4101 | 28.188  | 27.8629 | 27.828  | 27.7441 | 27.6106 | 27.8073 | 27.7803 | 27.8146 | Q9UNH7;AOA0A0     | Q9UNH7;AOA0A0   | Sorting nexin-6;Sc SNX6           |                           |
| 23.8046 | 24.0245 | 23.3709 | 23.4005 | 23.5264 | 23.58   | NaN     | 23.4496 | 24.0235 | 22.8947 | NaN     | 24.1301 | Q9Y5X2;C9J271;    | C9J271          | Sorting nexin-8 SNX8              |                           |
| 26.7096 | 27.0425 | 26.8768 | 26.6486 | 26.9192 | 26.9552 | 26.8858 | 26.9277 | 27.1827 | 26.6576 | 26.5093 | 26.8802 | Q9Y5X1;AOA087M    | Q9Y5X1;AOA087M  | Sorting nexin-9;Sc SNX9           |                           |
| 24.0089 | 22.7679 | 22.4787 | 23.5948 | 21.6529 | NaN     | NaN     | NaN     | NaN     | 22.8256 | 21.7841 | NaN     | P35610;B1APM4;    | P35610;B1APM4;  | Sterol O-acyltrans SOAT1          |                           |
| NaN     | 19.0483 | NaN     | O14508;F8V553;    | F8V553;         | F: Suppressor of cytt SOCS2       |                           |
| 28.1067 | 29.3224 | 28.9005 | 28.1898 | 28.854  | 28.8405 | 29.0371 | 28.333  | 28.2009 | 28.9667 | 28.6498 | 28.2254 | P00441;H7BYH4     | P00441;H7BYH4   | Superoxide dismu SOD1             |                           |
| 26.5226 | 28.8605 | 27.3245 | 26.6043 | 28.2346 | 27.1176 | 27.4214 | 28.8655 | 29.8502 | 26.6555 | 27.4417 | 28.5923 | P04179;AOA0C4D    | P04179;AOA0C4D  | Superoxide dismu SOD2             |                           |
| NaN     | 25.2221 | 25.5383 | 23.7407 | NaN     | 23.083  | P08294;M0R1V4     | P08294          | Extracellular supe SOD3           |                           |
| NaN     |         | 21.9636 | 21.5133 | NaN     | 22.2842 | NaN               | O94964;O94964-1 | O94964;O94964-2                   | Protein SOGA1;N- SOGA1    |
| 26.7636 | 26.2896 | 25.9542 | 26.7397 | 26.2191 | 25.9175 | 24.4274 | 26.4543 | 25.3996 | 25.9189 | 26.2557 | 26.1429 | P18583-5;P18583   | P18583-5;P18583 | Protein SON SON                   |                           |
| 23.0875 | NaN     | 23.0569 | 22.5206 | NaN     | O60504;O60504-1   | O60504;O60504-2 | Vinexin SORBS3                    |                           |
| 27.0782 | 26.2978 | 26.1514 | 26.6483 | 26.1748 | 26.034  | 27.238  | 26.3353 | 26.3759 | 27.2589 | 26.9326 | 26.4425 | Q00796;HOYLA4;    | Q00796;HOYLA4   | Sorbitol dehydrog SORD            |                           |
| NaN     |         | 23.5465 | 23.6239 | 23.914  | 23.3084 | 23.115  | 24.0939 | NaN     | NaN     | 23.8013 | 23.4875 | NaN               | Q99523;Q99523-1 | Q99523;Q99523-2                   | Soritin SORT1             |
| 24.117  | 22.9717 | 23.1968 | 23.5723 | 23.5217 | 23.4584 | NaN     | NaN     | NaN     | 22.852  | NaN     | NaN     | P23497;P23497-4   | P23497          | Nuclear autoantig SP100           |                           |
| 22.5455 | NaN     | 22.8789 | 23.1885 | 23.642  | 22.9742 | NaN     | NaN     | 23.3343 | NaN     | NaN     | 24.6367 | Q02447;Q02447-1   | Q02447;Q02447-5 | Transcription fact SP3            |                           |
| 25.298  | 25.6173 | 25.5424 | 25.143  | 25.2094 | 25.4756 | 25.0469 | NaN     | 24.4731 | 25.2231 | 25.0299 | NaN     | Q07617            | Q07617          | Sperm-associated SPAG1            |                           |
| 26.0029 | 24.8115 | 25.4789 | 25.9531 | 24.96   | 24.9895 | 24.0327 | NaN     | NaN     | NaN     | 24.2447 | 24.9911 | 24.4419           | Q96R06;J3KTQ0;  | K Q96R06                          | Sperm-associated SPAG5    |
| NaN     | 22.4785 | NaN               | O75391;J3LOQ5;  | J3 O75391;J3LOQ5;                 | J3 Sperm-associated SPAG7 |
| 26.8895 | 26.6457 | 26.5182 | 26.283  | 26.6745 | 26.3955 | 25.8778 | 26.7817 | 26.673  | 25.2627 | 25.1644 | 25.9001 | O60271-4;O60271   | O60271-4;O60271 | C-Jun-amino-term SPAG9            |                           |
| NaN     | NaN     | NaN     | NaN     | NaN     | NaN     | 21.2968 | NaN     | NaN     | NaN     | NaN     | NaN     | NaN               | P09486;E5RK62;  | F: P09486;E5RK62;                 | F: SPARC SPARC            |
|         | 23.1083 | NaN     |         | 24.0512 | 23.0604 | NaN     | 23.3711 | NaN     | NaN     | NaN     | NaN     | NaN               | Q9UBP0;Q9UBP0   | Q9UBP0;Q9UBP0                     | Spastin SPAST             |
| 26.9404 | 25.4988 | 25.7574 | 26.7689 | 25.8941 | 25.7321 | 24.9032 | 25.6323 | 24.3128 | 25.5976 | 25.2715 | 25.3458 | Q8NB90;Q8NB90     | Q8NB90;Q8NB90   | Spermatogenesis- SPATA5           |                           |
| 25.3877 | 24.2004 | 24.6703 | 25.5347 | 24.6244 | 24.4336 | 23.4835 | 23.8888 | 24.1687 | 24.3657 | 24.5685 | 23.1558 | Q9BVQ7;Q9BVQ7     | Q9BVQ7;Q9BVQ7   | Spermatogenesis- SPATA5L1         |                           |
| 28.1764 | 26.3061 | 26.281  | 26.288  | 25.6893 | 25.3338 | 24.0093 | 25.1794 | NaN     | 24.5733 | 24.4311 | NaN     | Q9NUQ6;AOA0A0     | Q9NUQ6;AOA0A0   | SPAT52-like prote SPAT52L         |                           |



|     |         |         |         |         |         |         |         |         |         |         |         |         |                                                 |                   |                    |                    |        |
|-----|---------|---------|---------|---------|---------|---------|---------|---------|---------|---------|---------|---------|-------------------------------------------------|-------------------|--------------------|--------------------|--------|
|     | 24.3758 | 24.2544 | 23.7393 | 24.1483 | 23.4814 | 24.0019 | 23.8582 | NaN     | NaN     | 24.3769 | 23.8616 | NaN     | K7E1H0;K7EMX1;K7E1H0;K7EMX1;K7E1V2;K7ESQ2       | SPC24             |                    |                    |        |
| NaN | NaN     | NaN     | NaN     | 24.5603 | NaN     | Q8NBT2;Q8NBT2-Q8NBT2;Q8NBT2-Kinetochore prote   | SPC24             |                    |                    |        |
|     | 21.7004 | NaN     | Q9HBM1                                          | Kinetochore prote | SPC25              |                    |        |
|     | 25.063  | 23.0879 | 23.9646 | 24.5292 | 23.921  | 23.7492 | NaN     | NaN     | 24.8573 | 24.399  | 23.8243 | 23.37   | Q9Y6A9;C9JBL1;X                                 | Q9Y6A9            | Signal peptidase c | SPC51              |        |
|     | 26.7591 | 26.3517 | 26.7521 | 26.9302 | 26.4838 | 26.8794 | 26.882  | 26.9786 | 27.3635 | 26.915  | 26.7042 | 26.8831 | Q15005;E9PL01;A                                 | Q15005;E9PL01;A   | Signal peptidase c | SPC52              |        |
|     | 25.6303 | 24.5649 | 24.926  | 25.1942 | 24.41   | 24.7215 | NaN     | 25.0026 | 25.7042 | 24.0926 | 24.567  | 24.4593 | P61009                                          | P61009            | Signal peptidase c | SPC53              |        |
|     | 21.7161 | NaN     | NaN     | NaN     | 22.2526 | NaN     | Q96EA4;Q96EA4-;Q96EA4;Q96EA4-;Protein Spindly   |                   |                    | SPDL1              |        |
|     | 22.2147 | 22.87   | 23.779  | NaN     | 22.7921 | 23.2871 | NaN     | NaN     | NaN     | NaN     | 22.5702 | NaN     | Q5M775;Q5M775-Q5M775;Q5M775-Cytospin-B          |                   |                    | SPECC1             |        |
|     | 23.3239 | 23.8368 | 23.6548 | 23.3838 | 23.8382 | 23.4157 | NaN     | NaN     | 22.6149 | 22.8205 | 23.017  | 22.6992 | Q69YQ0;Q69YQ0-Q69YQ0-Q69YQ0-Cytospin-A          |                   |                    | SPECC11;SPECC11-   |        |
|     | 22.3696 | NaN     | 22.3737 | 22.3762 | NaN     | Q96J17;C4B7M2;C                                 | Q96J17;C4B7M2;C   | Spatacsin          | SPG11              |        |
|     | 26.5876 | 25.8979 | 26.2043 | 25.4089 | 25.2924 | 25.8128 | 26.2093 | 26.3316 | 25.215  | 25.5415 | 25.5571 | 25.2798 | Q8N0X7                                          | Q8N0X7            | Spartin            | SPG20              |        |
| NaN | NaN     | NaN     | NaN     | 22.1187 | NaN     | Q9NZD8;HOYML6;Q9NZD8;HOYML6;Maspardin           |                   |                    | SPG21              |        |
|     | 25.0783 | 24.8715 | 24.8226 | 24.6932 | 24.4265 | 24.7213 | 24.8243 | 25.1089 | 25.2037 | 24.6846 | 24.5525 | 24.6072 | O43291;K7EM91;O43291;K7EM91;Kunitz-type prote   |                   |                    | SPINT2             |        |
|     | 24.0807 | 23.9924 | 23.8642 | 23.8421 | 23.4193 | 23.204  | 23.6859 | 23.6526 | NaN     | 23.2814 | 23.2189 | NaN     | Q08AE8;Q08AE8-;Q08AE8;Q08AE8-;Protein spire hom |                   |                    | SPIRE1             |        |
|     | 22.1026 | NaN     | 21.4679 | 22.0877 | NaN     | Q9H2V7;Q9H2V7-Q9H2V7;Q9H2V7-Protein spinster h  |                   |                    | SPNS1              |        |
| NaN | NaN     | NaN     | NaN     | NaN     | NaN     | NaN     | NaN     | NaN     | NaN     | 20.2679 | NaN     | NaN     | Q8IVW8                                          | Q8IVW8            | Protein spinster h | SPNS2              |        |
| NaN | NaN     | NaN     | 25.9573 | 24.1018 | NaN     | 25.7843 | NaN     | NaN     | NaN     | NaN     | 24.5221 | NaN     | Q8TCT8;HOYNA7;Q8TCT8;HOYNA7                     |                   |                    | Signal peptide pep | SPL2A  |
|     | 25.2093 | 25.3115 | 24.9331 | 25.2182 | 25.1568 | 25.1123 | 25.096  | 24.8884 | 25.6048 | 24.9739 | 25.2062 | 25.7126 | P35270                                          | P35270            | Sepiapterin reduc  | SPR                |        |
| NaN | NaN     | NaN     | 22.7686 | NaN     | 23.212  | 22.9773 | 23.1473 | NaN     | NaN     | 23.1559 | 22.6913 | NaN     | Q7Z699                                          | Q7Z699            | Sprouty-related, E | SPRED1             |        |
|     | 24.2223 | 24.6941 | 25.4605 | 24.8126 | 25.1777 | 25.7019 | 25.356  | NaN     | 25.1125 | 26.351  | 25.9089 | 25.8555 | Q7Z698;C9JG63;C                                 | Q7Z698;C9JG63;C   | Sprouty-related, E | SPRED2             |        |
|     | 22.0124 | NaN     | 21.2346 | 21.388  | NaN     | Q43597;A0A0A0N                                  | Q43597;A0A0A0N    | Protein sprouty h  | SPRY2              |        |
|     | 25.0951 | 25.1839 | 25.2711 | 25.0524 | 24.983  | 25.4331 | 24.6558 | NaN     | 24.9529 | 24.438  | 24.5238 | 25.2248 | Q9C004;A0A0C4D                                  | Q9C004;A0A0C4D    | Protein sprouty h  | SPRY4              |        |
|     | 25.1502 | 24.4964 | 24.9807 | 25.234  | 24.4071 | 25.0957 | 24.6405 | 24.7292 | 24.4455 | 24.6855 | 24.2455 | 24.1736 | Q5W111;Q5W111                                   | Q5W111            | SPRY domain-conl   | SPRYD7             |        |
| NaN | NaN     | NaN     | 22.14   | NaN     | 23.9099 | NaN     | P02549;A0A087W                                  | P02549;A0A087W    | Spectrin alpha ch  | SPTA1              |        |
|     | 29.9627 | 29.9371 | 29.9008 | 29.9958 | 29.5685 | 30.0276 | 30.1085 | 29.8324 | 29.4099 | 30.04   | 29.7947 | 29.5619 | Q13813;Q13813-;Q13813;Q13813-2                  |                   |                    | Spectrin alpha ch  | SPTAN1 |
|     | 30.636  | 30.3597 | 30.6692 | 30.623  | 30.2357 | 30.7464 | 30.6603 | 30.4842 | 30.3314 | 30.6445 | 30.4195 | 30.4264 | Q01082;A0A087W                                  | Q01082;A0A087W    | Spectrin beta ch   | SPTBN1             |        |
|     | 23.7192 | 23.6413 | 23.9089 | 23.5051 | NaN     | Q01082-3                                        | Q01082-3          | Spectrin beta ch   | SPTBN1             |        |
| NaN | NaN     | NaN     | 23.5601 | NaN     | O15020;O15020-;O15020;O15020-2                  |                   |                    | Spectrin beta ch   | SPTBN2 |
|     | 25.9739 | 25.5179 | 25.7623 | 26.2092 | 25.6414 | 25.6206 | 26.0159 | 26.1418 | 26.7533 | 26.2435 | 25.9281 | 26.0979 | O15269;O15269-;O15269                           |                   |                    | Serine palmitoyl   | SPTLC1 |
|     | 24.5022 | 23.8389 | 23.8933 | 24.07   | 23.4863 | 23.6826 | 26.2927 | 24.0236 | 23.504  | 23.2365 | NaN     | NaN     | O15270;HOYJV2                                   | O15270;HOYJV2     | Serine palmitoyl   | SPTLC2             |        |
|     | 26.6473 | 26.8441 | 26.702  | 27.0963 | 27.1173 | 26.956  | 25.4378 | 26.9897 | 28.1904 | 25.2871 | 26.2298 | 26.8013 | Q9Y6N5;H3BNX3;Q9Y6N5;H3BNX3                     |                   |                    | Sulfide:quinone o  | SQRDL  |
|     | 31.6385 | 30.6355 | 31.0815 | 30.4338 | 29.6692 | 30.313  | 31.0033 | 30.1562 | 30.1813 | 29.6663 | 29.1909 | 29.4557 | Q13501;Q13501-;Q13501;Q13501-2                  |                   |                    | Sequestosome-1     | SQSTM1 |
|     | 22.8847 | NaN     | 21.96   | 21.7389 | NaN     | 21.996  | NaN     | NaN     | NaN     | NaN     | NaN     | NaN     | Q9HD15;R4GMW                                    | Q9HD15            | Steroid receptor   | SRA1               |        |
|     | 24.4534 | 22.6781 | 24.1028 | 25.3521 | 23.684  | 23.7362 | NaN     | NaN     | NaN     | 23.702  | 22.804  | NaN     | Q8N5C6;Q8N5C6-Q8N5C6;Q8N5C6-51                  |                   |                    | RNA-binding d      | SRBD1  |
|     | 26.3371 | 26.4659 | 26.8642 | 26.1264 | 26.1004 | 26.821  | 26.7512 | 25.4875 | 26.282  | 26.6671 | 26.4093 | 26.3761 | P12931;P12931-2                                 | P12931;P12931-2   | Proto-oncogene t   | SRC                |        |
|     | 24.7691 | NaN     | 23.5623 | 24.3848 | 23.4896 | NaN     | NaN     | NaN     | NaN     | 23.6213 | 24.0141 | NaN     | Q8WXA9-2;Q8WX                                   | Q8WXA9-2;Q8WX     | Splicing regulato  | SREK1              |        |
| NaN | NaN     | NaN     | NaN     | NaN     | NaN     | NaN     | NaN     | NaN     | NaN     | NaN     | NaN     | NaN     | Q8N9Q2                                          | Q8N9Q2            | Protein SREK1IP1   | SREK1IP1           |        |
|     | 24.9319 | 25.0267 | 25.3901 | 24.5889 | 24.68   | 24.6247 | 24.0555 | NaN     | 24.6875 | 24.7559 | 25.0107 | NaN     | Q7Z6B7;G5EA48;Q7Z6B7;G5EA48-;SLIT-ROBO Rho G    |                   |                    | SRGAP1             |        |
|     | 26.3542 | 26.7633 | 27.1683 | 25.8151 | 26.0418 | 26.2966 | 26.2927 | 24.0915 | 25.5156 | 26.4945 | 26.2851 | 26.0047 | O75044;A2RUF3;O75044;A2RUF3-;SLIT-ROBO Rho G    |                   |                    | SRGAP2;SRGAP2B     |        |
|     | 25.7142 | 27.2814 | 26.3762 | 24.8071 | 26.5769 | 25.4881 | 29.9796 | 30.2425 | 28.1719 | 25.4538 | 25.8667 | 26.9394 | P10124                                          | P10124            | Serglycin          | SRGN               |        |
|     | 27.5764 | 28.0464 | 27.8529 | 27.4725 | 27.6444 | 27.8899 | 28.2771 | 27.086  | 26.8028 | 28.6446 | 28.1226 | 28.1951 | P30626;C9J0K6;P30626;C9J0K6;P3                  |                   |                    | Sorcin             | SRI    |
|     | 28.1554 | 28.1097 | 27.7446 | 27.7428 | 28.0461 | 27.8216 | 27.3702 | 27.7671 | 27.862  | 27.8241 | 28.0708 | 28.0367 | P19623;K7EKM4;P19623                            |                   |                    | Spermidine synth   | SRM    |
|     | 27.2009 | 27.1384 | 26.8622 | 27.2157 | 26.9692 | 26.9311 | 26.9459 | 27.4544 | 26.5836 | 27.2639 | 26.7967 | 27.3774 | P37108;HOYLA2;H                                 | P37108;HOYLA2     | Signal recognition | SRP14              |        |
|     | 26.2071 | 25.6441 | 26.3126 | 25.9074 | 26.0941 | 25.4695 | 25.3265 | NaN     | NaN     | 26.1357 | 26.7455 | 24.4036 | P09132;A0A087W                                  | P09132;A0A087W    | Signal recognition | SRP19              |        |
|     | 28.4211 | 27.6931 | 27.7685 | 28.0206 | 27.6301 | 27.4698 | 26.6584 | 26.388  | 25.4002 | 26.1385 | 26.4195 | 26.3759 | P61011;P61011-2                                 | P61011;P61011-2   | Signal recognition | SRP54              |        |
|     | 30.0828 | 28.3662 | 28.5171 | 29.9064 | 28.4029 | 28.6271 | 27.9761 | 27.5728 | 26.8229 | 28.2325 | 27.9063 | 27.4309 | Q9UHB9;Q9UHB9                                   | Q9UHB9;Q9UHB9     | Signal recognition | SRP68              |        |
|     | 29.7364 | 28.4107 | 28.499  | 29.7019 | 28.5137 | 28.4597 | 27.798  | 27.9903 | 27.7532 | 28.5204 | 28.5034 | 27.9607 | O76094;O76094-2                                 | O76094;O76094-2   | Signal recognition | SRP72              |        |
|     | 27.5665 | 27.5901 | 27.0095 | 26.8321 | 27.8994 | 27.2684 | 26.4401 | 28.0967 | 27.6438 | 27.2867 | 27.8473 | 27.3629 | P49458;E9PE20;P49458                            |                   |                    | Signal recognition | SRP9   |
|     | 28.2172 | 26.8912 | 27.3502 | 28.1117 | 27.2213 | 27.5731 | 26.2296 | 27.5229 | 25.6986 | 27.0268 | 27.5868 | 26.8747 | Q96SB4;Q96SB4-;Q96SB4;Q96SB4-3                  |                   |                    | SRSF protein kin   | SRPK1  |
|     | 22.2556 | NaN     | 23.4471 | 22.7233 | NaN     | P78362;P78362-2                                 | P78362;P78362-2   | SRSF protein kin   | SRPK2              |        |
|     | 27.914  | 27.1485 | 27.3807 | 27.7799 | 27.123  | 27.1569 | 27.2654 | 27.0795 | 26.8113 | 27.0569 | 26.9847 | 26.9862 | P08240;P08240-2                                 | P08240;P08240-2   | Signal recognition | SRPR               |        |
|     | 27.218  | 26.4981 | 26.9829 | 27.3529 | 26.576  | 27.1223 | 27.1575 | 27.5388 | 26.1768 | 27.183  | 26.6136 | 26.2343 | Q9Y5M8;H7C4H2;Q9Y5M8;H7C4H2                     |                   |                    | Signal recognition | SRPRB  |
|     | 23.9774 | NaN     | 23.3372 | 23.4551 | 22.9036 | NaN     | 25.7992 | 24.0657 | 23.3667 | 24.3135 | 22.9703 | NaN     | P78539;P78539-3                                 | P78539;P78539-3   | Sushi repeat-cont  | SRPX               |        |
|     | 22.8155 | 23.0138 | NaN     | NaN     | 23.0168 | NaN     | Q9GZT4;V9GYE8;Q9GZT4;V9GYE8                     |                   |                    | Serine racemase    | SRR    |
|     | 25.2275 | NaN     | 24.4918 | 25.0037 | NaN     | 24.7779 | NaN     | NaN     | NaN     | 25.7174 | NaN     | NaN     | Q8IYB3;A9Z1X7;E                                 | Q8IYB3;A9Z1X7;E   | Serine/arginine re | SRRM1              |        |
|     | 27.626  | 27.0144 | 26.6258 | 27.3011 | 26.5247 | 27.1813 | 24.8346 | 25.4934 | 26.8927 | 26.0745 | 26.5635 | 26.9515 | Q9UQ35;Q9UQ35                                   | Q9UQ35            | Serine/arginine re | SRRM2              |        |
|     | 28.055  | 26.53   | 27.2568 | 28.0733 | 27.1822 | 27.0079 | 25.5117 | 25.2101 | 25.1707 | 27.2723 | 27.4954 | 27.2937 | Q9BXP5;Q9BXP5-Q9BXP5;Q9BXP5--                   |                   |                    | Serrate RNA effec  | SRRT   |
|     | 30.1886 | 28.9801 | 29.2074 | 30.1202 | 28.7733 | 29.4213 | 28.1936 | 28.8678 | 27.6397 | 29.4628 | 29.74   | 28.7079 | Q07955;J3KTL2;Q                                 | Q07955;J3KTL2;Q   | Serine/arginine-ri | SRSF1              |        |
|     | 27.453  | 27.082  | 27.5592 | 27.9003 | 27.2832 | 27.8081 | 26.1855 | 27.5464 | 26.2328 | 27.7528 | 28.2781 | 27.737  | O75494;O75494-;O75494;O75494-3                  |                   |                    | Serine/arginine-ri | SRSF10 |
|     | 26.1342 | 24.9292 | 25.4911 | 26.1003 | 25.6381 | 25.7722 | 24.4854 | NaN     | 23.2415 | 24.8775 | 25.7011 | 25.5313 | Q05519;Q05519-;Q05519;Q05519-2                  |                   |                    | Serine/arginine-ri | SRSF11 |



|     |         |         |         |         |         |         |         |         |         |         |         |         |                  |                  |                      |                     |
|-----|---------|---------|---------|---------|---------|---------|---------|---------|---------|---------|---------|---------|------------------|------------------|----------------------|---------------------|
|     | 27.703  | 26.8998 | 27.3873 | 27.6115 | 27.3509 | 27.6152 | 27.4222 | 28.2849 | 27.3125 | 28.0036 | 28.7163 | 28.0184 | Q01130;J3KP15;J3 | Q01130;J3KP15;J3 | Serine/arginine-rii  | SRSF2               |
|     | 29.401  | 29.157  | 29.5938 | 29.9355 | 29.5161 | 29.7512 | 28.7321 | 29.4377 | 28.5734 | 29.9349 | 30.2125 | 29.7444 | P84103;P84103-2  | P84103;P84103-2  | Serine/arginine-rii  | SRSF3               |
|     | 25.5648 | 25.2085 | 25.3386 | 25.1645 | 25.5319 | 25.6721 | NaN     | NaN     | NaN     | 25.368  | 25.7751 | 25.2099 | Q08170;A0A0D9S   | Q08170;A0A0D9S   | Serine/arginine-rii  | SRSF4               |
|     | 26.1975 | 25.8355 | 26.0712 | 26.7505 | 26.3901 | 26.4257 | 25.2513 | 26.5376 | 27.8697 | 25.8273 | 26.3986 | 26.7902 | Q13243;Q13243-1  | Q13243;Q13243-1  | Serine/arginine-rii  | SRSF5               |
|     | 29.6427 | 28.7729 | 29.3473 | 29.8317 | 29.2266 | 29.531  | 28.1292 | 29.1004 | 27.9741 | 29.7311 | 29.9203 | 29.2705 | Q13247;Q13247-1  | Q13247;Q13247-1  | Serine/arginine-rii  | SRSF6               |
|     | 28.8748 | 27.8825 | 28.4529 | 29.0671 | 28.3321 | 29.0323 | 27.7651 | 28.1973 | 27.6677 | 29.0285 | 29.1714 | 29.0625 | Q16629;Q16629-1  | Q16629;Q16629-4  | Serine/arginine-rii  | SRSF7               |
|     | 20.0922 | NaN     | Q9BRL6;Q9BRL6-1  | Q9BRL6;Q9BRL6-2  | Serine/arginine-rii  | SRSF8               |
|     | 27.79   | 27.5899 | 27.0926 | 27.7794 | 27.5546 | 26.9728 | 26.2739 | 27.898  | 26.056  | 26.6744 | 27.3745 | 27.0394 | Q13242;S4R3G0;f  | Q13242;S4R3G0;f  | Serine/arginine-rii  | SRSF9               |
|     | 24.5681 | 24.8876 | 24.7405 | 24.1804 | 24.8106 | 24.1271 | 24.9949 | NaN     | 25.1197 | NaN     | 24.8947 | 25.323  | Q9BYN0           | Q9BYN0           | Sulfiredoxin-1       | SRXN1               |
|     | 28.3505 | 27.7319 | 28.3327 | 28.7133 | 28.2626 | 28.3024 | 27.5961 | 23.6118 | 26.2478 | 28.0667 | 27.9324 | 27.6905 | P05455;E7ERC4;E1 | P05455           | Lupus La protein     | SSB                 |
|     | 27.4524 | 28.7161 | 27.6058 | 27.6861 | 28.3707 | 27.6873 | 28.396  | 28.2123 | 28.5693 | 28.1396 | 27.1945 | 27.6323 | Q04837;A0A0G2J1  | Q04837;A0A0G2J1  | Single-stranded D    | SSBP1               |
|     | 22.7898 | NaN     | 22.7708 | 22.8299 | NaN     | 22.6781 | NaN     | NaN     | NaN     | NaN     | NaN     | NaN     | P28290;E9PHV5;P  | P28290;E9PHV5;P  | Sperm-specific an    | SSFA2               |
|     | 25.9333 | 24.466  | 24.8943 | 25.3667 | 24.4887 | 24.532  | NaN     | NaN     | 25.2931 | 25.505  | 24.6838 | NaN     | P43307;C9J3L8;C9 | P43307;C9J3L8;C9 | Translocon-associ    | SSR1                |
|     | 24.4998 | 23.5018 | 23.9163 | 24.4228 | 23.6208 | 24.0379 | 24.3475 | 24.0592 | NaN     | 24.1553 | NaN     | NaN     | Q9UNL2;C9JA28;C  | Q9UNL2;C9JA28;C  | Translocon-associ    | SSR3                |
|     | 27.4174 | 27.8098 | 27.7928 | 28.0388 | 28.2805 | 27.9952 | 27.4105 | 28.0737 | 28.4843 | 27.7054 | 27.6813 | 27.7539 | P51571;A6NLM8    | P51571           | Translocon-associ    | SSR4                |
|     | 28.0144 | 26.7229 | 27.3301 | 28.1906 | 27.1223 | 27.5805 | 26.5557 | 26.4357 | 25.7879 | 27.7246 | 27.233  | 27.3651 | Q08945;E9PMD4;f  | Q08945           | FACT complex sub     | SSRP1               |
|     | 21.4519 | NaN     | Q9Y2D8;S4R403;C  | Q9Y2D8;S4R403;C  | Afadin- and alpha    | SSX2IP              |
|     | 27.3891 | 27.5516 | 27.7895 | 26.9286 | 27.2044 | 27.8784 | 28.3944 | 27.794  | 27.7064 | 28.1753 | 28.0259 | 28.2164 | P50502;Q3KNR6;f  | P50502;Q3KNR6;f  | Hsc70-interacting    | ST13;ST13P5         |
|     | 21.9163 | NaN     | 21.7951 | 21.8528 | NaN     | NaN     | 24.6593 | NaN     | NaN     | 24.3043 | 22.2245 | NaN     | Q11201;E5RHHV6;f | Q11201;E5RHHV6   | CMP-N-acetylne       | ST3GAL1             |
|     | 22.3225 | NaN     | NaN     | 22.7632 | NaN     | Q8WVVM7;Q8WVVM7  | Q8WVVM7;Q8WVVM7  | Cohesin subunit S    | STAG1;DKFZp781E11.1 |
|     | 23.3867 | 22.9921 | 23.139  | 23.3286 | 22.1403 | 23.0049 | NaN     | NaN     | NaN     | 23.0896 | 23.1629 | NaN     | Q8N3U4;Q8N3U4    | Q8N3U4;Q8N3U4    | Cohesin subunit S    | STAG2               |
|     | 26.2548 | 26.7394 | 25.7561 | 26.0835 | 25.2009 | 24.928  | 26.3897 | 24.6356 | 26.4213 | 25.9802 | 24.6046 | 25.8127 | Q92783;Q92783-1  | Q92783;Q92783-2  | Signal transducing   | STAM                |
|     | 23.7029 | 23.1373 | 23.0295 | 22.6121 | 22.1506 | 22.2578 | NaN     | NaN     | NaN     | 22.1597 | NaN     | NaN     | O75886;O75886-1  | O75886;O75886-2  | Signal transducing   | STAM2               |
|     | 26.57   | 27.19   | 26.6305 | 26.2326 | 26.5075 | 26.5689 | 27.0474 | 27.1239 | 27.3279 | 26.3703 | 26.3604 | 26.9863 | O95630;C9JK83;O  | O95630;C9JK83;O  | STAM-binding pro     | STAMBP              |
|     | 24.294  | 24.0784 | 24.0436 | 23.7287 | 23.7553 | 24.0438 | 24.4194 | NaN     | NaN     | 23.7963 | 24.032  | NaN     | Q96FJ0;Q96FJ0-2  | Q96FJ0;Q96FJ0-2  | AMSH-like protea     | STAMBPL1            |
|     | 20.853  | NaN     | Q96DR4;Q96DR4-1  | Q96DR4;Q96DR4-2  | STAR-related lipid   | STARD4              |
|     | 27.4234 | 26.4763 | 26.895  | 27.0562 | 26.4894 | 27.1883 | 26.9534 | 26.621  | 26.6031 | 26.9366 | 26.9902 | 26.272  | P42224;P42224-2  | P42224;P42224-2  | Signal transducer    | STAT1               |
|     | 23.9426 | 23.1954 | 23.3668 | 23.1923 | 23.0777 | 23.3606 | NaN     | NaN     | NaN     | NaN     | NaN     | NaN     | P52630;P52630-4  | P52630;P52630-4  | Signal transducer    | STAT2               |
|     | 26.8975 | 26.2263 | 26.5895 | 26.7836 | 26.3176 | 26.5632 | 26.2604 | 26.1637 | 25.9602 | 25.8065 | 25.3914 | 25.9955 | P40763;P40763-2  | P40763;P40763-2  | Signal transducer    | STAT3               |
|     | 22.798  | 22.5343 | 22.6435 | 22.5328 | 23.0106 | NaN     | NaN     | NaN     | NaN     | 22.9236 | NaN     | 24.1161 | P51692;P42229;K  | P51692;P42229;K  | Signal transducer    | STAT5B;STAT5A       |
|     | 24.4914 | 23.7081 | 24.3573 | 24.3237 | 23.9444 | 24.3115 | 23.6927 | 23.6888 | 24.2406 | 23.8596 | 23.9082 | 23.8654 | P42226;P42226-3  | P42226;P42226-3  | Signal transducer    | STAT6               |
|     | 27.5784 | 26.8311 | 26.5586 | 27.2383 | 27.0828 | 26.6207 | 26.1629 | 27.5405 | 26      | 26.5357 | 26.6923 | 26.6847 | O95793;O95793-1  | O95793;O95793-2  | Double-stranded I    | STAU1               |
|     | 24.1383 | NaN     | 22.7067 | 23.0221 | 22.9262 | NaN     | Q9NUL3;E5RJN7;f  | Q9NUL3;E5RJN7;f  | Double-stranded I    | STAU2               |
|     | 25.7119 | 26.5683 | 26.0026 | 25.4108 | 26.7459 | 25.426  | 31.3953 | 31.0123 | 29.9078 | 29.126  | 28.1363 | 28.701  | P52823;P52823-2  | P52823;P52823-2  | Stanniocalcin-1      | STC1                |
| NaN | NaN     | NaN     | NaN     | NaN     | NaN     | NaN     | NaN     | NaN     | NaN     | NaN     | NaN     | 24.1618 | Q9UHE8;Q6NZ63    | Q9UHE8           | Metalloreductase     | STEAP1              |
|     | 24.4762 | 24.3418 | 25.1432 | 24.6164 | 24.4946 | 25.8199 | 24.7346 | NaN     | 24.7129 | 26.1027 | 24.6099 | 25.1563 | Q658P3;Q658P3-1  | Q658P3;Q658P3-1  | Metalloreductase     | STEAP3              |
|     | 22.3899 | 22.6606 | 22.5736 | 22.2163 | 22.5302 | NaN     | Q13586;G0XQ39;f  | Q13586;G0XQ39;f  | Stromal interactio   | STIM1               |
|     | 30.6074 | 30.8979 | 30.707  | 30.2432 | 30.6358 | 30.6565 | 31.4226 | 31.2925 | 30.4334 | 30.9698 | 31.0722 | 31.0012 | P31948;P31948-2  | P31948;P31948-2  | Stress-induced-ph    | STIP1               |
|     | 29.0361 | 29.6042 | 29.4958 | 28.9745 | 29.6141 | 29.5851 | 28.6187 | 27.6264 | 28.0364 | 28.8407 | 28.9202 | 28.7945 | O94804;H0YB71    | O94804           | Serine/threonine-    | STK10               |
|     | 21.4517 | NaN     | 21.685  | NaN     | Q15831;Q15831-1  | Q15831;Q15831-2  | Serine/threonine-    | STK11               |
| NaN | NaN     | 22.7297 | 22.3856 | 22.4956 | NaN     | 22.8447 | 22.3091 | NaN     | NaN     | NaN     | NaN     | NaN     | O75716;B8ZZ15;Bf | O75716;B8ZZ15;Bf | Serine/threonine-    | STK16               |
|     | 26.8964 | 26.2837 | 26.9597 | 26.4792 | 26.4941 | 26.8216 | 27.0791 | 25.8014 | 26.001  | 27.0605 | 26.7694 | 26.9005 | Q9Y6E0-2;B4DR8C  | Q9Y6E0-2;B4DR8C  | Serine/threonine-    | STK24               |
|     | 24.6347 | 24.5902 | 25.1445 | 24.8802 | 24.376  | 25.0519 | NaN     | NaN     | NaN     | 24.3907 | 24.6937 | NaN     | O00506;O00506-1  | O00506;O00506-3  | Serine/threonine-    | STK25               |
|     | 24.0481 | 22.7357 | 23.7901 | 23.5657 | 23.1296 | 23.809  | NaN     | NaN     | NaN     | 23.9256 | NaN     | NaN     | Q9P289;Q8NBY1;f  | Q9P289;Q8NBY1;f  | Serine/threonine-    | STK26               |
|     | 21.7409 | NaN     | 22.4702 | 21.6525 | NaN     | 22.6085 | NaN     | NaN     | NaN     | NaN     | NaN     | NaN     | Q13188;Q13188-1  | Q13188;Q13188-2  | Serine/threonine-    | STK3                |
|     | 23.05   | NaN     | 23.0526 | 23.1103 | 22.8904 | 23.7857 | NaN     | NaN     | NaN     | 23.4526 | 23.5615 | NaN     | Q86UX6;Q86UX6-1  | Q86UX6;Q86UX6-1  | Serine/threonine-    | STK32C              |
|     | 26.3458 | 26.0278 | 26.6232 | 25.7396 | 25.9024 | 26.1017 | 26.0724 | 26.0193 | 24.8954 | 26.2422 | 26.1104 | 25.7913 | Q15208;Q9Y2H1;f  | Q15208           | Serine/threonine-    | STK38               |
|     | 25.1362 | 24.479  | 24.9788 | 25.4211 | 24.6289 | 24.9374 | 24.37   | 25.1412 | NaN     | 24.3363 | 24.785  | 24.9277 | Q9UEW8;Q9UEW8    | Q9UEW8;Q9UEW8    | STE20/SPS1-relate    | STK39               |
|     | 26.4721 | 25.8604 | 26.1643 | 26.4283 | 25.7076 | 26.3526 | 26.3614 | 26.0632 | 26.0054 | 26.4298 | 25.6128 | 25.3632 | Q13043;Q13043-1  | Q13043;Q13043-2  | Serine/threonine-    | STK4                |
|     | 29.3076 | 30.3296 | 29.9452 | 28.4873 | 29.5716 | 29.0292 | 29.1898 | 30.0585 | 29.2388 | 28.2102 | 28.684  | 28.9452 | P16949;P16949-2  | P16949;P16949-2  | Stathmin             | STMN1               |
| NaN | NaN     | NaN     | NaN     | 27.0183 | NaN     | Q93045;E5RGX5;C  | Q93045;E5RGX5;C  | Stathmin-2;Stathr    | STMN2               |
|     | 25.852  | 26.649  | 27.3802 | 26.4544 | 26.7923 | 27.635  | 27.8869 | 27.1994 | 28.8513 | 29.5152 | 28.401  | 29.1852 | P27105;P27105-2  | P27105           | Erythrocyte band     | STOM                |
|     | 25.547  | 27.3498 | 26.4445 | 26.2837 | 27.2345 | 26.5774 | 25.7935 | 27.501  | 28.3286 | 24.9137 | 25.6558 | 26.9892 | Q9UIJ1;Q9UIJ1-2  | Q9UIJ1;Q9UIJ1-2  | Stomatatin-like prot | STOML2              |
| NaN | NaN     | NaN     | NaN     | NaN     | NaN     | NaN     | NaN     | NaN     | NaN     | NaN     | NaN     | 26.3529 | Q8WXE9;Q8WXE9    | Q8WXE9;Q8WXE9    | Stonin-2             | STON2               |
| NaN | NaN     | NaN     | NaN     | NaN     | NaN     | NaN     | NaN     | NaN     | NaN     | NaN     | NaN     | 19.1259 | Q7RTN6;J3QRC1;f  | Q7RTN6;J3QRC1;f  | STE20-related kin    | STRADA              |
|     | 29.1249 | 28.6129 | 28.4346 | 28.469  | 28.4383 | 28.4571 | 28.3729 | 28.4736 | 27.8624 | 28.9897 | 29.043  | 28.3086 | Q9Y3F4;Q9Y3F4-2  | Q9Y3F4;Q9Y3F4-2  | Serine-threonine I   | STRAP               |
|     | 24.1166 | 23.4353 | 23.8512 | 24.1137 | 23.4749 | 23.6804 | 23.7065 | NaN     | NaN     | 23.7433 | 23.6354 | NaN     | Q5VSL9;Q5VSL9-2  | Q5VSL9;Q5VSL9-2  | Striatin-interactin  | STRIP1;STRIP2       |
|     | 24.6404 | 24.0571 | 23.9469 | 24.1077 | 24.4142 | 23.834  | 24.1049 | 24.5583 | NaN     | 24.2823 | 24.6824 | 24.0048 | O43815;O43815-1  | O43815;O43815-2  | Striatin             | STRN                |
|     | 26.8165 | 25.7181 | 26.0083 | 26.0448 | 25.9399 | 25.9867 | 26.3444 | 25.8756 | 25.7528 | 26.1778 | 26.068  | 25.4765 | Q13033;Q13033-1  | Q13033;Q13033-2  | Striatin-3           | STRN3               |
|     | 26.8631 | 26.2154 | 26.1182 | 25.7112 | 25.9985 | NaN     | 25.4537 | NaN     | 26.3503 | 25.9913 | 26.7869 | NaN     | Q9NRL3;Q9NRL3-1  | Q9NRL3;Q9NRL3-1  | Striatin-4           | STRN4               |



|         |         |         |         |         |         |         |         |         |         |         |         |                 |                 |                     |                 |                  |       |
|---------|---------|---------|---------|---------|---------|---------|---------|---------|---------|---------|---------|-----------------|-----------------|---------------------|-----------------|------------------|-------|
| NaN     | NaN     | NaN     | NaN     | 21.5116 | NaN     | NaN     | NaN     | 23.9264 | NaN     | NaN     | 21.9329 | P08842          | P08842          | Steryl-sulfatase    | STS             |                  |       |
| 26.4937 | 25.3529 | 25.8119 | 26.2542 | 25.0878 | 25.8471 | 25.3705 | NaN     | 25.4384 | 25.8853 | 24.728  | 24.468  | P46977;P46977-2 | P46977;P46977-2 | Dolichyl-diphosph   | STT3A           |                  |       |
| 26.0796 | 25.0675 | 25.4585 | 25.9813 | 25.1948 | 25.4282 | 26.2121 | 25.3984 | 26.5399 | 25.5911 | 25.3029 | 26.093  | Q8TCJ2          | Q8TCJ2          | Dolichyl-diphosph   | STT3B           |                  |       |
| 26.5103 | 27.2292 | 26.6628 | 26.2983 | 26.9628 | 26.5208 | 26.5106 | 26.7888 | 27.2426 | 26.9015 | 26.875  | 27.3122 | Q9UNE7;Q9UNE7   | Q9UNE7;Q9UNE7   | E3 ubiquitin-prote  | STUB1           |                  |       |
| NaN     | 22.3258 | NaN     | NaN     | NaN     | O60499;K7EQ84;K | O60499;K7EQ84;K | Syntaxin-10         | STX10           |                  |       |
| 24.4556 | NaN     | NaN     | 23.414  | 23.5065 | NaN     | Q86Y82;B1AJQ6   | Q86Y82;B1AJQ6   | Syntaxin-12         | STX12           |                  |       |
| 23.6973 | 24.0533 | 23.8927 | 24.0176 | 23.5961 | 23.9503 | 23.7509 | 23.9447 | NaN     | 23.46   | NaN     | NaN     | O14662;O14662-5 | O14662;O14662-5 | Syntaxin-16         | STX16;STX16-NPE |                  |       |
| 24.5578 | 23.9252 | 24.6534 | 24.4169 | NaN     | 25.0044 | 24.4576 | NaN     | 24.2582 | 25.3056 | 24.7818 | 25.0905 | P32856;P32856-3 | P32856;P32856-3 | Syntaxin-2          | STX2            |                  |       |
| 25.383  | 24.7627 | 24.7313 | 25.3339 | 24.3195 | NaN     | 24.7703 | NaN     | NaN     | 25.5235 | 25.1451 | NaN     | Q13277;AOA0J9Y1 | Q13277;AOA0J9Y1 | Syntaxin-3          | STX3            |                  |       |
| 28.0862 | 28.1637 | 28.4662 | 28.4133 | 28.3604 | 28.8058 | 28.3124 | 28.2619 | 28.449  | 28.891  | 28.5846 | 29.0236 | Q12846;Q12846-2 | Q12846;Q12846-2 | Syntaxin-4          | STX4            |                  |       |
| 24.6759 | 24.7586 | 24.6715 | 24.7133 | 24.796  | 24.7756 | 24.1143 | NaN     | 25.3893 | 24.6774 | 24.8083 | 25.1958 | Q13190;Q13190-2 | Q13190;Q13190-2 | Syntaxin-5          | STX5            |                  |       |
| 25.5123 | 24.9631 | 25.1673 | 25.3534 | 24.9249 | 24.437  | NaN     | NaN     | NaN     | 24.7816 | 24.9168 | NaN     | O43752;O43752-2 | O43752          | Syntaxin-6          | STX6            |                  |       |
| 26.6375 | 27.1358 | 26.7881 | 26.3733 | 26.5659 | 26.7897 | 27.0494 | 26.9932 | 27.3381 | 26.6579 | 26.6741 | 27.0255 | O15400;O15400-2 | O15400;O15400-2 | Syntaxin-7          | STX7            |                  |       |
| 22.6587 | 22.1104 | 22.9225 | 22.5911 | 22.2473 | 22.7379 | NaN     | NaN     | 22.5963 | NaN     | 21.7769 | 22.3845 | Q9UNK0;I3L305;K | Q9UNK0;I3L305   | Syntaxin-8          | STX8            |                  |       |
| 25.8611 | 26.6387 | 26.8006 | 25.9178 | 26.6357 | 27.0572 | 27.0345 | 25.9201 | 26.9954 | 27.4233 | 27.1418 | 27.4195 | P61764;P61764-2 | P61764;P61764-2 | Syntaxin-binding    | STXBP1          |                  |       |
| 25.6333 | 26.2633 | 26.5164 | 25.999  | 26.5022 | 26.7502 | 23.5744 | 22.6053 | 24.1648 | 24.3469 | 24.4977 | 24.7083 | Q15833;Q15833-2 | Q15833;Q15833-2 | Syntaxin-binding    | STXBP2          |                  |       |
| 27.8351 | 27.9223 | 28.0907 | 27.7833 | 28.0086 | 28.3435 | 27.6262 | 26.8207 | 27.7091 | 28.3901 | 28.0252 | 28.0602 | O00186;REV_H7   | O00186          | Syntaxin-binding    | STXBP3          |                  |       |
| 21.828  | NaN     | NaN     | 21.8535 | 22.1941 | NaN     | 21.9262 | NaN     | NaN     | 21.6598 | 21.9416 | 22.0528 | Q5T5C0;Q5T5C0-2 | Q5T5C0;Q5T5C0-2 | Syntaxin-binding    | STXBP5          |                  |       |
| 28.2562 | 28.3389 | 27.849  | 27.6223 | 28.2256 | 27.852  | 28.5707 | 28.8967 | 27.7341 | 28.0612 | 28.3041 | 28.7958 | P53999;D6RC37;C | P53999          | Activated RNA pol   | SUB1            |                  |       |
| 25.497  | 24.137  | 24.1876 | 25.6426 | 24.7368 | 24.7193 | 23.4555 | NaN     | 23.8025 | 24.182  | 24.0566 | 23.4291 | Q9P2R7;Q9P2R7-2 | Q9P2R7;Q9P2R7-2 | Succinyl-CoA ligas  | SUCLA2          |                  |       |
| 26.8478 | 26.8655 | 26.4409 | 26.9407 | 26.7456 | 26.3227 | 25.9047 | 27.0328 | 28.016  | 26.4311 | 26.4977 | 26.1155 | P53597;H7C233   | P53597          | Succinyl-CoA ligas  | SUCLG1          |                  |       |
| 27.075  | 26.4198 | 26.3171 | 26.9248 | 26.441  | 26.6192 | 25.4089 | 25.9577 | 26.9216 | 26.6583 | 26.3394 | 25.7797 | Q96199;Q96199-2 | Q96199;Q96199-2 | Succinyl-CoA ligas  | SUCLG2          |                  |       |
| NaN     | 20.5941 | NaN     | Q8IWZ8          | Q8IWZ8          | SURP and G-patch    | SUGP1           |                  |       |
| 21.9981 | NaN     | 22.8167 | 23.3453 | NaN     | Q8IX01;Q8IX01-3 | Q8IX01;Q8IX01-3 | SURP and G-patch    | SUGP2           |                  |       |
| 25.926  | 25.8298 | 25.2895 | 25.3148 | 25.6684 | 25.7105 | 25.4764 | 25.564  | 25.8252 | 25.1143 | 25.7307 | 26.1408 | Q9Y2Z0;Q9Y2Z0-2 | Q9Y2Z0;Q9Y2Z0-2 | Suppressor of G2    | SUGT1           |                  |       |
| NaN     | NaN     | NaN     | NaN     | NaN     | NaN     | 22.4483 | 23.0367 | NaN     | NaN     | 22.7369 | NaN     | Q8NBK3;E9PF05;C | Q8NBK3;E9PF05;C | Sulfatase-modifyin  | SUMF1           |                  |       |
| 25.2511 | 26.1853 | 25.723  | 25.164  | 26.2867 | 25.8416 | 26.403  | 27.5031 | 26.5577 | 26.2458 | 26.5595 | 26.3649 | Q8NBJ7;J3KQJ1;C | Q8NBJ7;J3KQJ1;C | Sulfatase-modifyin  | SUMF2           |                  |       |
| 25.1199 | 26.3965 | 25.8662 | 25.203  | 25.9441 | 25.8348 | 25.9398 | 26.3559 | 25.8689 | 26.0059 | 26.3356 | 26.6377 | P63165;B8ZZN6;B | P63165;B8ZZN6;B | Small ubiquitin-re  | SUMO1           |                  |       |
| 28.3059 | 27.8002 | 27.423  | 27.2334 | 27.4065 | 27.5884 | 28.1507 | NaN     | NaN     | 28.281  | 27.5478 | NaN     | P61956;P61956-2 | P61956;P61956-2 | Small ubiquitin-re  | SUMO2           |                  |       |
| 29.0987 | 27.8022 | 28.4521 | 29.2091 | 28.2124 | 28.7706 | 27.9474 | 27.6025 | 27.2131 | 28.9716 | 28.787  | 28.6673 | Q9Y5B9;G3V5A4;I | Q9Y5B9          | FACT complex sub    | SUPT16H         |                  |       |
| 24.5049 | 24.4429 | 23.8851 | 24.0576 | 24.8086 | NaN     | NaN     | NaN     | NaN     | NaN     | 24.2577 | NaN     | P63272;D3D2T5;J | P63272;D3D2T5;J | Transcription elon  | SUPT4H1         |                  |       |
| 27.0734 | 26.3285 | 26.481  | 27.0182 | 26.5535 | 26.6017 | 25.1009 | 23.7308 | 23.8535 | 26.445  | 26.6607 | 26.2124 | O00267;O00267-2 | O00267;O00267-2 | Transcription elon  | SUPT5H          |                  |       |
| 26.738  | 25.2193 | 26.1484 | 26.7322 | 26.729  | 26.343  | 23.5876 | 24.234  | 24.0226 | 25.9908 | 25.9839 | 26.0616 | Q7KZ85;Q7KZ85-2 | Q7KZ85          | Transcription elon  | SUPT6H          |                  |       |
| 22.3623 | NaN     | NaN     | 22.3538 | NaN     | Q8IYB8;B1AR60   | Q8IYB8          | ATP-dependent R     | SUPV3L1         |                  |       |
| 27.638  | 26.8442 | 27.3476 | 27.3746 | 26.7762 | 27.4461 | 26.7961 | NaN     | 27.148  | 27.0926 | 26.93   | 24.4038 | O15260;Q5T8U5;I | O15260;Q5T8U5;I | Surfeit locus prote | SURF4           |                  |       |
| 24.893  | 24.4459 | 25.11   | 24.9909 | 24.8135 | NaN     | 25.7819 | NaN     | 24.62   | 25.7533 | 25.7287 | NaN     | O60279;H7C2K7   | O60279          | Sushi domain-con    | SUSD5           |                  |       |
| 22.7359 | 22.0189 | 22.2562 | 23.605  | 22.3503 | 22.256  | NaN     | NaN     | 21.8347 | 22.5162 | 22.6302 | NaN     | Q15022;J3QQW9   | Q15022;J3QQW9   | Polycomb protein    | SUZ12           |                  |       |
| 24.2426 | 24.7478 | 25.0442 | 24.3135 | 24.9337 | 25.2357 | 24.8641 | NaN     | 24.7753 | 24.4096 | 24.4031 | 24.9352 | O95425-2;O95425 | O95425-2;O95425 | Supervillin         | SVIL            |                  |       |
| 23.7765 | 24.9103 | 25.3035 | 24.231  | 24.7779 | 25.6023 | NaN     | NaN     | 24.2638 | NaN     | 24.2836 | 25.3103 | Q8NHG7          | Q8NHG7          | Small VCP/p97-int   | SVIP            |                  |       |
| 27.2136 | 26.6857 | 27.3415 | 26.5293 | 27.0865 | 27.0593 | 26.1999 | 23.1966 | 25.244  | 26.6791 | 26.3203 | 25.8422 | Q9UH65;E7EMB1   | Q9UH65;E7EMB1   | Switch-associated   | SWAP70          |                  |       |
| 25.6694 | 24.9574 | 25.2414 | 24.7189 | 24.4193 | 24.7604 | 25.3738 | 25.0914 | 24.8824 | 24.8306 | 24.7207 | 24.8905 | Q96A49          | Q96A49          | Synapse-associate   | SYAP1           |                  |       |
| NaN     | 20.1463 | NaN     | NaN             | NaN             | Q15431;Q5VXJ5;A     | Q15431;Q5VXJ5;A | Synaptonemal cor | SYCP1 |
| 22.3398 | NaN     | 22.08   | 22.3717 | NaN     | 22.0783 | NaN     | NaN     | NaN     | NaN     | NaN     | NaN     | Q6ZW31;Q6ZW31   | Q6ZW31;Q6ZW31   | Rho GTPase-activ    | SYDE1           |                  |       |
| 24.6295 | NaN     | 23.9258 | 24.8752 | 23.9407 | 23.7726 | NaN     | NaN     | NaN     | 24.3033 | 24.122  | NaN     | Q92797;AOA087V  | Q92797;AOA087V  | Symplekin           | SYMPK           |                  |       |
| 29.7756 | 29.6559 | 29.3203 | 29.7772 | 29.5386 | 29.4899 | 29.0733 | 28.9747 | 29.1694 | 29.2818 | 29.6063 | 29.7229 | O60506-3;O60506 | O60506-3;O60506 | Heterogeneous nt    | SYNCRIP         |                  |       |
| 28.0377 | 28.2741 | 28.0768 | 27.9462 | 27.841  | 28.3516 | 28.7364 | NaN     | 28.0953 | 29.4403 | 28.565  | NaN     | Q8NF91;E7ENN3;I | Q8NF91;E7ENN3;I | Nesprin-1           | SYNE1           |                  |       |
| 25.0952 | 27.7236 | 27.06   | 25.0029 | 26.7836 | 26.5263 | NaN     | 28.7428 | 28.4081 | 27.4681 | 28.6935 | 29.5123 | Q8WXH0;G3V5X4   | Q8WXH0;G3V5X4   | Nesprin-2           | SYNE2           |                  |       |
| 23.486  | 23.0583 | NaN     | 24.0566 | 23.249  | NaN     | 23.4761 | NaN     | NaN     | 23.3598 | NaN     | NaN     | O43759;O43759-2 | O43759;O43759-2 | Synaptogyrin-1      | SYNGR1          |                  |       |
| 27.5563 | 26.9495 | 27.6139 | 27.9608 | 27.5083 | 27.7964 | 27.0555 | 27.0224 | 27.1755 | 27.0639 | 26.5816 | 26.862  | O43760;O43760-2 | O43760;O43760-2 | Synaptogyrin-2      | SYNGR2          |                  |       |
| 23.6281 | 23.8068 | 23.9174 | 23.881  | 23.9939 | NaN     | NaN     | NaN     | NaN     | NaN     | 23.7465 | NaN     | P57105;AOA087X  | P57105;AOA087X  | Synaptotagmin-2-bi  | SYNJ2BP;SYNJ2BP |                  |       |
| 23.6992 | 22.8523 | 23.565  | 23.3998 | 23.4538 | NaN     | O15061;AOA075B  | O15061;AOA075B  | Synemin             | SYNM            |                  |       |
| 26.4475 | NaN     | 25.4612 | 26.148  | 24.4926 | 25.5559 | NaN     | NaN     | NaN     | 26.2929 | 25.545  | NaN     | Q16563-2;Q16563 | Q16563-2;Q16563 | Synaptophysin-lik   | SYPL1           |                  |       |
| 25.3248 | NaN     | 24.3736 | NaN     | NaN     | NaN     | NaN     | NaN     | NaN     | 25.1271 | NaN     | NaN     | Q96C24;Q96C24-2 | Q96C24;Q96C24-2 | Synaptotagmin-lik   | SYTL4           |                  |       |
| 24.3851 | 25.4571 | 24.9612 | 23.8222 | 24.6086 | 24.2903 | 24.2525 | NaN     | 24.5571 | NaN     | 24.1982 | NaN     | Q7Z422-5;Q7Z422 | Q7Z422-5;Q7Z422 | SUZ domain-cont     | SZR01           |                  |       |
| 23.6782 | 23.5571 | 23.5823 | 23.5891 | 23.5795 | 23.455  | 23.8191 | NaN     | NaN     | 23.7091 | 23.6044 | NaN     | Q15750;Q15750-2 | Q15750;Q15750-2 | TGF-beta-activate   | TAB1            |                  |       |
| 22.0156 | NaN     | Q9NYJ8;Q9NYJ8-2 | Q9NYJ8;Q9NYJ8-2 | TGF-beta-activate   | TAB2            |                  |       |
| 26.4487 | 25.8658 | 26.6861 | 24.4866 | 24.3185 | 24.0408 | 25.0138 | 25.4409 | NaN     | 22.356  | NaN     | NaN     | O75410;O75410-2 | O75410;O75410-2 | Transforming acid   | TACC1           |                  |       |
| 23.377  | NaN     | NaN     | 22.5564 | NaN     | O95359;O95359-2 | O95359;O95359-2 | Transforming acid   | TACC2           |                  |       |
| 23.2172 | 23.5217 | 23.0131 | 22.6769 | 23.1319 | NaN     | Q9Y6A5;H0Y8F2   | Q9Y6A5          | Transforming acid   | TACC3           |                  |       |
| 24.2859 | 24.028  | 23.5066 | 24.7206 | 24.1312 | 23.3844 | NaN     | NaN     | NaN     | NaN     | NaN     | NaN     | Q9BSH4          | Q9BSH4          | Translational activ | TACO1           |                  |       |



|         |         |         |         |         |         |         |         |         |         |         |         |                  |                              |                                         |                          |
|---------|---------|---------|---------|---------|---------|---------|---------|---------|---------|---------|---------|------------------|------------------------------|-----------------------------------------|--------------------------|
| 27.1556 | 26.7568 | 27.7717 | 27.3456 | 27.0852 | 27.969  | 27.0388 | 26.5101 | 26.7152 | 27.4597 | 26.7069 | 27.0905 | P09758           | P09758                       | Tumor-associated TACSTD2                |                          |
| 26.2104 | 26.5131 | 26.3247 | 26.3797 | 26.6773 | 26.3326 | 25.5979 | 26.8609 | 26.1371 | 26.4025 | 26.4532 | 26.8232 | Q92804;Q92804-1  | Q92804;Q92804-2              | TATA-binding prot TAF15                 |                          |
| 23.0832 | NaN     |         | 23.7846 | 23.1716 | NaN     | NaN     | NaN     | NaN     | NaN     | NaN     |         | Q15542;Q15542-1  | Q15542;Q15542-2              | Transcription initi: TAF5               |                          |
| 20.3093 | NaN     | P49848;P49848-3  | P49848;P49848-3              | Transcription initi: TAF6               |                          |
| NaN     | 21.586  | NaN     | Q727C8;A0A0A0N   | Q727C8;A0A0A0N               | Transcription initi: TAF8               |                          |
| 23.839  | 25.657  | 23.9933 | 23.7302 | 25.3529 | NaN     | NaN     | NaN     | NaN     |         | 23.9147 | NaN     | Q01995;H0YCU9;f  | Q01995;H0YCU9                | Transgelin TAGLN                        |                          |
| 28.5919 | 28.6827 | 28.5541 | 28.3287 | 28.3997 | 28.8056 | 29.5136 | 28.3995 | 28.167  | 28.2856 | 28.3077 | 28.5591 | P37802;X6RJP6;P  | P37802;X6RJP6;P              | Transgelin-2 TAGLN2                     |                          |
| 23.5738 | 24.4836 | 24.3705 | 23.8867 | 24.895  | 24.2981 | 24.1364 | 24.7063 | NaN     | 24.6016 | 24.1616 | NaN     | Q9UI15;C9JSW6;f  | Q9UI15;C9JSW6;f              | Transgelin-3;Trans: TAGLN3              |                          |
| 29.7765 | 31.2207 | 30.5778 | 29.7478 | 31.2041 | 30.9604 | 29.91   | 30.1316 | 30.0495 | 30.3741 | 30.8122 | 31.0804 | P37837;F2Z393;E  | P37837;F2Z393                | Transaldolase TALDO1                    |                          |
| 22.3435 | NaN     | NaN     |         | 21.9197 | NaN     | NaN     | NaN     | NaN     | NaN     |         | 21.4041 | NaN              | Q9C0D5;Q9C0D5-Q9C0D5;Q9C0D5- | Protein TANC1 TANC1                     |                          |
| NaN     | NaN     |         | 21.7923 | NaN     | Q9HCD6;A0A087V   | Q9HCD6;A0A087V               | Protein TANC2 TANC2                     |                          |
| 26.6108 | 26.8677 | 27.3328 | 26.3551 | 26.3503 | 26.7129 | 26.3876 | 25.1511 | 25.6265 | 27.0051 | 26.2426 | 26.1115 | Q7L7X3;Q7L7X3-3  | Q7L7X3;Q7L7X3-3              | Serine/threonine- TAOK1                 |                          |
| NaN     | NaN     |         | 22.222  | NaN     | NaN     | NaN     | NaN     | NaN     |         | 22.1114 | NaN     | NaN              | NaN                          | NaN                                     |                          |
| 27.8529 | 27.7523 | 27.8058 | 27.0919 | 27.0459 | 27.2802 | 27.1768 | 26.6451 | 27.1546 | 27.1717 | 26.958  | 26.9044 | Q9H2K8;G3V1Q8;   | Q9H2K8;G3V1Q8                | Serine/threonine- TAOK3                 |                          |
| 24.203  | 24.6071 | 24.4045 | 24.4062 | 24.577  | 24.6292 | 24.4582 | 24.9862 | 24.9179 | 24.0093 | 23.9142 | 24.0576 | Q03518           | Q03518                       | Antigen peptide t TAP1                  |                          |
| 24.0261 | 24.7597 | 25.0731 | 24.7549 | 24.7047 | 24.7165 | 24.5935 | NaN     | NaN     | 24.3316 | 23.9538 | NaN     | Q03519;A0A0G2J   | Q03519;A0A0G2J               | Antigen peptide t TAP2                  |                          |
| 25.5869 | 26.7016 | 26.2395 | 25.9469 | 26.4339 | 26.3914 | 25.7704 | 25.0022 | 26.5305 | 26.0534 | 25.8018 | 26.2746 | Q15533;A0A0G2J   | Q15533;A0A0G2J               | Tapasin TAPBP                           |                          |
| 27.4794 | 26.7551 | 26.9945 | 27.559  | 27.0135 | 27.1761 | 25.9523 | 26.7979 | 26.5932 | 27.1054 | 27.1257 | 26.6633 | Q13148;A0A087V   | Q13148;A0A087V               | TAR DNA-binding TARDBP                  |                          |
| 30.1658 | 29.8486 | 29.9784 | 29.8605 | 29.9463 | 29.8916 | 30.2383 | 30.4246 | 30.1799 | 30.2523 | 30.2888 | 30.3118 | P26639;P26639-2  | P26639;P26639-2              | Threonine--tRNA I TARS                  |                          |
| 21.1191 | NaN     |         | 20.8843 | 22.0408 | 20.7899 | NaN     | NaN     | NaN     | NaN     | NaN     | NaN     | Q9BW92;U3KQGC    | Q9BW92;U3KQGC                | Threonine--tRNA I TARS2                 |                          |
| NaN     | 23.4087 | NaN     | NaN     |         | 23.2222 | NaN     | NaN     | NaN     | NaN     | NaN     | 22.7241 | NaN              | Q6P1N9;H0YBX2;f              | Q6P1N9;H0YBX2;f                         | Putative deoxyrib TATDN1 |
| 29.2272 | 27.9666 | 29.291  | 27.629  | 25.9414 | 27.6734 | 29.3868 | 27.5624 | 25.9912 | 27.0818 | 26.0064 | 23.2791 | Q86VP1-2;Q86VP   | Q86VP1-2;Q86VP               | Tax1-binding prot TAX1BP1               |                          |
| 25.1647 | 24.6114 | 24.6289 | 24.8182 | 24.8442 | 24.6147 | 25.6529 | 25.1131 | 25.0217 | 25.2895 | 25.2668 | 25.4844 | Q14907;A0A087X   | Q14907;A0A087X               | Tax1-binding prot TAX1BP3               |                          |
| 25.8728 | 26.1028 | 27.0997 | 25.9624 | 26.6171 | 27.0441 | 25.3767 | NaN     | NaN     | 27.071  | 26.523  | 26.2425 | Q9BXI6;Q9BXI6-2; | Q9BXI6;Q9BXI6-2;             | TBC1 domain fam TBC1D10A                |                          |
| 26.0851 | 26.2276 | 26.8578 | 26.1186 | 26.6339 | 26.9302 | 25.9588 | 25.8145 | 25.772  | 27.2564 | 27.3434 | 27.3734 | Q4KMP7;Q4KMP;    | Q4KMP7;Q4KMP;                | TBC1 domain fam TBC1D10B                |                          |
| 23.0897 | 22.9142 | 22.9894 | 22.841  | 23.1882 | NaN     | NaN     | 23.2946 | 23.8151 | 23.4629 | 23.4439 | 23.4413 | Q9NVG8;Q9NVG8    | Q9NVG8;Q9NVG8                | TBC1 domain fam TBC1D13                 |                          |
| 26.5054 | 25.6077 | 26.1415 | 26.0502 | 25.5433 | 26.0253 | 25.8375 | 26.5796 | 25.6657 | 25.7135 | 25.8847 | NaN     | Q8TC07;Q8TC07-   | Q8TC07;Q8TC07-               | TBC1 domain fam TBC1D15                 |                          |
| 23.987  | 23.1407 | 23.0268 | 23.3572 | 23.032  | 23.1532 | 23.3044 | NaN     | NaN     | 23.3876 | 23.1974 | NaN     | Q9HA65;Q9HA65-   | Q9HA65;Q9HA65-               | TBC1 domain fam TBC1D17                 |                          |
| 23.5939 | 22.2387 | 23.0691 | 23.7063 | 22.7572 | 23.3198 | 22.4839 | 23.2787 | NaN     | 22.8571 | 22.8671 | NaN     | Q9BYX2;Q9BYX2-   | Q9BYX2;Q9BYX2-               | TBC1 domain fam TBC1D2                  |                          |
| 23.7873 | 24.0319 | 23.8601 | 23.5612 | 23.7576 | 23.5567 | 24.2082 | NaN     | NaN     | 24.1353 | 23.921  | NaN     | Q9NUY8;E9PGE5;   | Q9NUY8;E9PGE5;               | TBC1 domain fam TBC1D23                 |                          |
| 23.1164 | 23.4898 | 23.4105 | 23.3894 | 23.216  | 23.0734 | 23.3991 | NaN     | NaN     | 23.0877 | NaN     | NaN     | Q9ULP9;Q9ULP9-   | Q9ULP9;Q9ULP9-               | TBC1 domain fam TBC1D24                 |                          |
| 23.0468 | NaN     | 22.5209 | 23.5522 | 22.6577 | NaN     | NaN     | NaN     | NaN     | 22.8266 | NaN     | NaN     | Q9UPU7;Q9UPU7    | Q9UPU7;Q9UPU7                | TBC1 domain fam TBC1D28                 |                          |
| 28.5475 | 27.0058 | 27.8209 | 27.9243 | 26.8897 | 27.0978 | 26.8324 | 27.1726 | 25.1356 | 26.2874 | 25.7435 | 25.0829 | O60343;O60343-2  | O60343;O60343-2              | TBC1 domain fam TBC1D4                  |                          |
| 22.8972 | NaN     | 23.2922 | 22.7413 | 23.3481 | NaN     | 25.0549 | 25.3677 | NaN     | NaN     | NaN     | NaN     | Q92609;Q92609-   | Q92609;Q92609-               | TBC1 domain fam TBC1D5                  |                          |
| 24.7571 | 23.9736 | 24.5086 | 24.4383 | 24.0045 | 24.1864 | 24.4383 | 23.976  | 24.3221 | 24.4643 | 24.3304 | 24.1822 | Q66K14;Q66K14-1  | Q66K14;Q66K14-2              | TBC1 domain fam TBC1D9B                 |                          |
| 28.9126 | 30.0844 | 29.5339 | 28.6072 | 29.5192 | 29.3446 | 29.6791 | 29.1329 | 29.6436 | 29.465  | 29.6106 | 29.7772 | O75347;E5RJD8;E  | O75347;E5RJD8;E              | Tubulin-specific ct TBCA                |                          |
| 26.5777 | 26.754  | 26.9864 | 26.4985 | 26.0777 | 26.2889 | 26.4883 | 25.8397 | 26.4792 | 25.8875 | 26.4077 | 26.8283 | Q99426;K7EP07;C  | Q99426;K7EP07;C              | Tubulin-folding co TBCB                 |                          |
| 23.2981 | 23.8751 | 23.9774 | 23.1414 | 24.0038 | 23.6872 | NaN     | NaN     | 24.4447 | NaN     | NaN     | NaN     | Q15814           | Q15814                       | Tubulin-specific ct TBCC                |                          |
| 28.4323 | 26.6374 | 27.4888 | 27.8894 | 26.8702 | 27.4181 | 26.8687 | 26.3244 | 26.8497 | 27.3085 | 27.0491 | 26.5919 | Q9BTW9;J3KR97;f  | Q9BTW9;J3KR97;f              | Tubulin-specific ct TBCE                |                          |
| 26.0284 | 25.6217 | 25.6552 | 25.8171 | 25.708  | 25.4752 | 25.5328 | NaN     | 25.2857 | 25.4053 | 25.9733 | NaN     | Q15813;Q15813-1  | Q15813;Q15813-2              | Tubulin-specific ct TBCE                |                          |
| 26.4874 | 25.467  | 26.0522 | 25.8281 | 25.185  | 25.5597 | 26.2685 | 25.2747 | 26.0767 | 25.4014 | 25.3425 | 25.422  | Q9UHD2;F5H206;   | Q9UHD2                       | Serine/threonine- TBK1                  |                          |
| 22.3008 | NaN     | NaN     |         | 21.9968 | NaN     | NaN     | NaN     | NaN     | NaN     | NaN     | 22.2424 | Q9BZK7;A0A0D9S   | Q9BZK7;A0A0D9S               | F-box-like/WD rep TBL1XR1;TBL1X;TBL1Y   |                          |
| 23.8639 | 23.8518 | 23.9608 | 23.7675 | 23.7254 | NaN     | NaN     | 24.3169 | 24.2049 | 24.6795 | 24.0999 | NaN     | Q9Y4P3;E9PF19;Q  | Q9Y4P3;E9PF19;Q              | Transducin beta-li TBL2                 |                          |
| 26.2588 | 25.0505 | 25.6532 | 26.9863 | 25.4757 | 25.6085 | NaN     | 23.5619 | NaN     | 25.78   | 25.7527 | 23.9578 | Q12788;J3KNP2;   | A Q12788;J3KNP2              | Transducin beta-li TBL3                 |                          |
| 22.3204 | NaN     | NaN     |         | 22.8569 | NaN     | NaN     | NaN     | NaN     | 22.1086 | 22.159  | NaN     | P62380;Q7Z6U1;f  | P62380;Q7Z6U1;f              | TATA box-binding TBP11                  |                          |
| 26.6889 | 24.8633 | 25.2358 | 26.3661 | 24.3748 | 25.5172 | NaN     | NaN     | NaN     | 24.7412 | 24.5427 | NaN     | Q969Z0;C9IZN7;Q  | Q969Z0;C9IZN7;Q              | Protein TBRG4 TBRG4                     |                          |
| 28.7788 | 27.338  | 28.093  | 28.2778 | 27.2063 | 27.6812 | 27.9296 | NaN     | NaN     | 27.6215 | 28.173  | NaN     | Q9Y4C2;Q9Y4C2-1  | Q9Y4C2;Q9Y4C2-2              | TRPM8 channel-a: TCAF1                  |                          |
| 22.6111 | NaN     | 22.2123 | 22.6977 | 21.9198 | 22.1551 | NaN     | NaN     | NaN     | NaN     | NaN     | NaN     | A6NFK2;A6NFK2-   | A6NFK2;A6NFK2-               | TRPM8 channel-a: TCAF2                  |                          |
| 24.3377 | 24.768  | 24.4197 | 24.3977 | 25.1847 | 24.8608 | 24.3151 | 24.284  | 24.1552 | 24.8666 | 25.1632 | 25.3494 | P23193;P23193-2  | P23193;P23193-2              | Transcription elon TCEA1                |                          |
| 22.5915 | 23.1122 | 23.9802 | 22.7282 | 23.824  | 24.2423 | NaN     | NaN     | NaN     | NaN     | 23.2812 | NaN     | Q969E4;Q5H9L2;f  | Q969E4;Q5H9L2;f              | Transcription elon TCEAL3;TCEAL5;TCEAL6 |                          |
| 27.931  | 28.3264 | 27.8904 | 27.9674 | 28.0829 | 28.0644 | 28.2952 | 28.4379 | 27.695  | 28.6192 | 28.3212 | 28.4543 | Q15369;E5RHG8;   | Q15369;E5RHG8;               | Transcription elon TCEB1                |                          |
| 26.251  | 27.1221 | 26.7058 | 26.4771 | 26.7272 | 26.5922 | 27.339  | 27.3122 | 27.175  | 27.2578 | 27.4419 | 26.5199 | Q15370;Q15370-1  | Q15370;Q15370-2              | Transcription elon TCEB2                |                          |
| NaN     | NaN     |         | 22.6485 | NaN     | 23.1569 | NaN     | NaN     | NaN     | 23.0875 | NaN     | NaN     | Q14241;A0A024R   | Q14241;A0A024R               | Transcription elon TCEB3                |                          |
| 25.7945 | 25.2983 | 26.0771 | 26.1446 | 25.9777 | 26.0969 | 24.5947 | NaN     | 24.6844 | 26.4294 | 26.7905 | 26.5348 | Q14776;Q14776-1  | Q14776;Q14776-2              | Transcription elon TCEB1                |                          |
| 23.2356 | NaN     | NaN     |         | 23.7535 | NaN     | NaN     | NaN     | 24.1757 | NaN     | 24.1194 | 23.6813 | NaN              | Q9BQ70;H3BQ53;               | Q9BQ70;H3BQ53;                          | Transcription fact TCF25 |
| 23.1503 | 23.008  | 23.4315 | 23.8072 | 23.012  | 23.9024 | NaN     | NaN     | NaN     | 23.1753 | 23.1378 | NaN     | Q13488;E9PM12;f  | Q13488;E9PM12;f              | V-type proton Atf TCIRG1                |                          |
| 25.0438 | 25.0106 | 25.1928 | 25.4483 | 25.2922 | 25.1035 | 24.9715 | NaN     | 24.4176 | 24.1284 | 25.3567 | 25.3394 | Q13428;Q13428-1  | Q13428;Q13428-2              | Treacle protein TCOF1                   |                          |
| 31.9428 | 31.6664 | 31.6202 | 32.0185 | 31.9066 | 31.7745 | 31.5787 | 31.9847 | 31.5346 | 32.0041 | 32.0231 | 31.7245 | P17987;E7EQR6;E  | P17987;E7EQR6;E              | T-complex proteir TCP1                  |                          |
| NaN     | NaN     | NaN     |         | 19.7679 | NaN     | Q9NUW8;G3V2F4    | Q9NUW8;G3V2F4                | Tyrosyl-DNA phos TDP1                   |                          |
| 21.9022 | NaN     |         | 21.0055 | NaN     | NaN              | NaN                          | NaN                                     |                          |
|         |         |         |         |         |         |         |         |         |         |         |         | Q95551;X6R5A3;f  | Q95551;X6R5A3;f              | Tyrosyl-DNA phos TDP2                   |                          |



|     |         |         |         |         |         |         |         |         |         |         |         |         |                                  |                     |                 |
|-----|---------|---------|---------|---------|---------|---------|---------|---------|---------|---------|---------|---------|----------------------------------|---------------------|-----------------|
|     | 27.0889 | 26.3064 | 26.9166 | 27.19   | 26.2386 | 27.1701 | 27.1865 | 27.2241 | 26.7484 | 27.5742 | 26.8347 | 26.8251 | Q9NZ01;M0R3C3; Q9NZ01            | Very-long-chain ei  | TECR            |
|     | 25.1221 | 23.5347 | 24.0479 | 24.9554 | 23.8417 | 24.2648 | 23.6828 | NaN     | 23.7828 | 24.9317 | 23.9843 | NaN     | Q9Y4R8;H3BR53 Q9Y4R8;H3BR53      | Telomere length r   | TELO2           |
|     | 25.3858 | 25.4183 | 26.3474 | 25.4743 | 25.2806 | 25.3054 | 25.9381 | 22.9682 | NaN     | 25.7225 | NaN     | NaN     | Q9P273;A0A0A0N Q9P273;A0A0A0N    | Teneurin-3          | TENM3           |
|     | 22.1209 | NaN     | 21.8018 | 21.8981 | NaN     | 21.4586 | NaN     | NaN     | NaN     | NaN     | NaN     | NaN     | Q15554;U3KQ35;I Q15554;U3KQ35;I  | Telomeric repeat-   | TERF2           |
|     | 22.8556 | NaN     | Q9NYB0 Q9NYB0                    | Telomeric repeat-   | TERF2IP         |
|     | 26.6161 | 26.8901 | 26.8163 | 26.3467 | 26.6339 | 26.8121 | 26.6172 | 26.6653 | 26.4814 | 26.5826 | 26.6508 | 26.597  | Q9UGI8;Q9UGI8-; Q9UGI8;Q9UGI8-;  | Testin              | TES             |
|     | 24.7366 | 23.4615 | 24.3619 | 25.2978 | 24.1697 | 24.4981 | NaN     | NaN     | NaN     | 24.0548 | 24.04   | NaN     | Q9NXF1;Q9NXF1- Q9NXF1;Q9NXF1-    | Testis-expressed +  | TEX10           |
|     | 24.9121 | 23.5226 | 23.9205 | 23.9883 | NaN     | 23.9627 | 25.1489 | NaN     | 24.0587 | 24.6046 | 23.9139 | NaN     | Q9Y6I9;C9JXQ7;C Q9Y6I9;C9JXQ7;C  | Testis-expressed +  | TEX264          |
|     | 23.5908 | NaN     | NaN     | 23.0329 | NaN     | NaN     | NaN     | NaN     | NaN     | 22.1923 | NaN     | NaN     | Q5JUR7;A0A0C4D Q5JUR7;A0A0C4D    | Testis-expressed +  | TEX30           |
|     | 25.9986 | 25.8819 | 25.3874 | 26.193  | 25.9446 | 25.503  | 24.5562 | 26.0999 | 26.8881 | 24.7067 | 25.0708 | 25.0784 | Q00059;Q00059-; Q00059;Q00059-2  | Transcription fact  | TFAM            |
|     | 22.6672 | NaN     | 21.7473 | 22.0802 | 21.7904 | NaN     | NaN     | NaN     | NaN     | NaN     | 22.3129 | NaN     | Q9H5Q4 Q9H5Q4                    | Dimethyladenosin    | TFB2M           |
|     | 24.5816 | 24.1585 | 24.1328 | 24.7595 | 24.1713 | 24.0554 | 23.8925 | 23.9773 | 23.8996 | 23.8739 | 23.7196 | 23.842  | Q12800;Q12800-; Q12800;Q12800-2  | Alpha-globin trans  | TFCP2           |
|     | 27.8476 | 27.825  | 27.5557 | 27.1296 | 26.9465 | 27.2038 | 27.7418 | 27.2329 | 27.3035 | 27.5642 | 27.3043 | 27.3405 | Q92734;Q92734-; Q92734;Q92734-2  | Protein TFG         | TFG             |
|     | 23.9193 | 22.4049 | 23.2689 | 24.7227 | 23.3468 | 23.4029 | NaN     | NaN     | NaN     | 23.1988 | NaN     | NaN     | Q9UBB9;Q9UBB9 Q9UBB9             | Tuftelin-interactin | TFIP11          |
|     | 21.8965 | 22.3984 | 23.6995 | 21.826  | NaN     | 22.3884 | 27.8878 | 30.4118 | 28.7308 | NaN     | 26.0084 | 25.3028 | P10646;C9JBB3;C P10646;C9JBB3    | Tissue factor path  | TFPI            |
|     | 32.5854 | 32.2118 | 32.6563 | 33.0001 | 32.4001 | 32.8732 | 31.5759 | 31.3338 | 31.1612 | 32.2478 | 31.5223 | 31.3434 | P02786;G3V0E5;I P02786;G3V0E5    | Transferrin recept  | TFRC            |
| NaN | NaN     | NaN     | NaN     | NaN     | NaN     | NaN     | 23.7283 | NaN     | NaN     | NaN     | NaN     | NaN     | P01137;M0R2S0 P01137             | Transforming gro    | TGFB1           |
|     | 22.8763 | NaN     | NaN     | NaN     | NaN     | NaN     | 25.3535 | NaN     | NaN     | NaN     | NaN     | NaN     | P61812;P61812-2 P61812;P61812-2  | Transforming gro    | TGFB2           |
|     | 23.5401 | 26.6807 | 25.9416 | 23.7712 | 25.6905 | 24.3626 | 30.1216 | 30.3596 | 28.4882 | 26.0006 | 27.4056 | 27.1884 | Q15582;H0Y8L3;S Q15582;H0Y8L3    | Transforming gro    | TGFB1           |
| NaN | NaN     | NaN     | NaN     | NaN     | NaN     | NaN     | NaN     | NaN     | NaN     | 22.4775 | NaN     | NaN     | P36897;F8W1R9;I P36897;F8W1R9;I  | TGF-beta recepto    | TGFBR1;ACVR1B;A |
|     | 25.4358 | 25.4237 | 24.9425 | 24.9301 | 24.9388 | 25.1339 | 25.6215 | 26.8733 | 26.9104 | 25.8459 | 25.143  | 26.1105 | P37173;P37173-2 P37173;P37173-2  | TGF-beta recepto    | TGFBR2          |
|     | 23.3949 | 23.1364 | 23.1209 | 23.5829 | NaN     | 22.858  | NaN     | NaN     | NaN     | 23.1608 | 22.8883 | NaN     | Q8WUJ2 Q8WUJ2                    | Transforming gro    | TGFBRAP1        |
|     | 31.6549 | 30.862  | 31.4068 | 31.318  | 30.9389 | 31.3017 | 30.1994 | 30.2103 | 30.1685 | 29.9203 | 29.9141 | 29.8357 | P21980;P21980-2 P21980;P21980-2  | Protein-glutamine   | TGM2            |
| NaN | NaN     | NaN     | NaN     | NaN     | NaN     | NaN     | NaN     | 20.7897 | NaN     | NaN     | NaN     | NaN     | Q08188 Q08188                    | Protein-glutamine   | TGM3            |
|     | 26.2241 | 25.8498 | 25.5521 | 25.8574 | 25.3555 | 25.707  | 27.4613 | 25.4764 | 28.3553 | 26.1157 | 25.5466 | 24.2554 | O43493;O43493-; O43493;O43493-2  | Trans-Golgi netw    | TGOLN2          |
|     | 24.1216 | 23.1627 | 23.6223 | 24.1118 | 23.1868 | NaN     | NaN     | NaN     | NaN     | 23.4184 | NaN     | NaN     | Q6YHU6;Q6YHU6 Q6YHU6;Q6YHU6      | Thyroid adenoma     | THADA           |
|     | 25.5447 | 24.2228 | 24.4361 | NaN     | NaN     | NaN     | 24.7795 | NaN     | NaN     | 25.1621 | NaN     | NaN     | P07204 P07204                    | Thrombomodulin      | THBD            |
|     | 28.3092 | 27.9827 | 28.8623 | 27.3967 | 27.876  | 28.2451 | 29.9427 | 29.1231 | 28.116  | 28.5704 | 28.4427 | 27.8481 | P07996;P07996-2 P07996;P07996-2  | Thrombospondin-     | THBS1           |
| NaN | NaN     | NaN     | NaN     | NaN     | NaN     | NaN     | 23.7775 | NaN     | NaN     | NaN     | NaN     | NaN     | P35443;E7ES19 P35443;E7ES19      | Thrombospondin-     | THBS4           |
|     | 25.9704 | 24.7987 | 25.5485 | 26.2207 | 25.026  | 25.572  | 25.5129 | 26.0578 | 26.8247 | 25.7586 | 25.551  | 26.0153 | Q8WUY1;H0YAR9 Q8WUY1             | Protein THEM6       | THEM6           |
|     | 21.5569 | NaN     | Q5TEJ8;H7C124;Q Q5TEJ8;H7C124;Q  | Protein THEMIS2     | THEMIS2         |
|     | 23.207  | NaN     | NaN     | 22.9916 | NaN     | NaN     | 22.5182 | NaN     | NaN     | 22.817  | NaN     | NaN     | Q9NWX6;E5RIQ8 Q9NWX6             | Probable tRNA(Hi    | THG1L           |
|     | 24.1026 | NaN     | 23.4835 | 24.4212 | 23.3735 | 23.9003 | NaN     | NaN     | 23.3217 | 23.7309 | 23.5452 | NaN     | Q96FV9;A0A087M Q96FV9;A0A087M    | THO complex sub     | THOC1           |
|     | 25.4619 | NaN     | 23.9571 | 25.368  | NaN     | 24.0138 | NaN     | NaN     | NaN     | 24.7436 | 23.7689 | 23.4986 | Q8NI27;A0A0C4D Q8NI27;A0A0C4D    | THO complex sub     | THOC2           |
|     | 24.4341 | 24.2764 | 24.3213 | 24.2507 | 24.7184 | 23.9604 | 24.3153 | 24.5487 | 24.2938 | 24.5986 | 24.6605 | 24.3903 | Q96J01;Q96J01-2; Q96J01;Q96J01-2 | THO complex sub     | THOC3           |
|     | 23.4849 | NaN     | 23.0017 | 23.5643 | 22.5951 | 22.7045 | NaN     | NaN     | NaN     | NaN     | NaN     | NaN     | Q13769;C9JXG5;F Q13769;C9JXG5;F  | THO complex sub     | THOC5           |
|     | 25.4969 | 23.8833 | 23.8178 | 24.8042 | 24.4296 | NaN     | 23.3119 | NaN     | 23.714  | 24.4236 | 24.3489 | 23.9139 | Q86W42;Q86W42; Q86W42;Q86W42     | THO complex sub     | THOC6           |
|     | 24.4759 | 24.3665 | 23.9415 | 24.4833 | 24.9095 | 24.2484 | NaN     | NaN     | NaN     | 23.9623 | 24.3566 | 25.1108 | Q6I9Y2;H7C5E3;A Q6I9Y2           | THO complex sub     | THOC7           |
|     | 27.6061 | 27.686  | 27.301  | 26.9395 | 27.4792 | 27.3271 | 27.8781 | 27.6796 | 28.0352 | 27.9811 | 27.8779 | 28.206  | P52888;K7EP46;K P52888;K7EP46    | Thimet oligopepti   | THOP1           |
|     | 27.1528 | 27.2394 | 27.2625 | 27.3371 | 27.3879 | 27.529  | 26.1296 | 26.906  | 26.4674 | 27.156  | 27.6455 | 27.1628 | Q9Y2W1 Q9Y2W1                    | Thyroid hormone     | THRAP3          |
|     | 22.4763 | 23.813  | 23.1203 | 22.6068 | 23.0829 | 22.8222 | 27.1562 | 26.3571 | 26.8173 | 25.6132 | 23.6977 | 25.8763 | Q6ZMP0;Q6ZMP0 Q6ZMP0;Q6ZMP0      | Thrombospondin-     | THSD4           |
|     | 23.6486 | 24.1353 | 24.076  | 24.1534 | 24.672  | 24.5074 | 22.7477 | NaN     | NaN     | 23.7238 | 24.2811 | 24.4591 | Q9NXG2;H3BNW C Q9NXG2;H3BNW C    | THUMP domain-c      | THUMPD1         |
|     | 25.4399 | 24.5475 | 25.0025 | 25.4306 | 24.9234 | 25.0588 | 25.1718 | NaN     | 25.374  | 25.7449 | 25.9105 | 25.3766 | Q9BV44;H7C3J3;+ Q9BV44;H7C3J3    | THUMP domain-c      | THUMPD3         |
|     | 25.5064 | 24.5499 | 24.0091 | 24.7505 | 24.5818 | 24.3015 | 24.8099 | NaN     | NaN     | 24.5371 | 24.4176 | NaN     | Q01085-2;Q0108 Q01085-2;Q0108    | Nucleolysin TIAR    | TIAL1           |
| NaN | NaN     | NaN     | NaN     | NaN     | NaN     | NaN     | 20.0192 | NaN     | NaN     | NaN     | NaN     | NaN     | P35590 P35590                    | Tyrosine-protein k  | TIE1            |
|     | 23.37   | 24.2965 | 23.463  | 22.9155 | 23.3721 | 22.9281 | 23.7479 | NaN     | 23.5321 | 23.539  | 23.444  | 23.5926 | Q9NQ88;A0A0U11 Q9NQ88            | Fructose-2,6-bispl  | TIGAR           |
|     | 23.4806 | 25.1998 | 24.0648 | 23.9395 | 25.1044 | 23.8547 | NaN     | 25.5076 | 26.2098 | 24.0021 | 24.9822 | 25.0618 | P62072 P62072                    | Mitochondrial im    | TIMM10          |
|     | 23.9315 | 23.8138 | NaN     | 23.637  | NaN     | Q9Y5L4;K7EIT2 Q9Y5L4;K7EIT2      | Mitochondrial im    | TIMM13          |
|     | 26.1794 | 24.5814 | 24.9656 | 25.7487 | 24.9465 | 24.8927 | 23.6799 | NaN     | 25.8563 | 24.3942 | 24.0019 | NaN     | O43615;M0QXU7 O43615;M0QXU7      | Mitochondrial im    | TIMM44          |
| NaN | 23.3957 | 22.9039 | 23.3059 | 23.3679 | NaN     | NaN     | 23.9491 | NaN     | NaN     | 23.8385 | NaN     | NaN     | Q3ZCQ8;Q3ZCQ8 Q3ZCQ8;Q3ZCQ8      | Mitochondrial im    | TIMM50          |
| NaN | 23.8801 | 23.0353 | 22.3937 | 24.1632 | NaN     | NaN     | 24.6202 | 24.0615 | NaN     | NaN     | NaN     | 24.4469 | O60220 O60220                    | Mitochondrial im    | TIMM8A          |
| NaN | 22.1252 | NaN     | NaN     | NaN     | NaN     | NaN     | 23.4961 | NaN     | NaN     | NaN     | 22.2219 | NaN     | Q9Y5J9;E9PIR3;G Q9Y5J9;E9PIR3;G  | Mitochondrial im    | TIMM8B          |
|     | 23.8177 | 25.0796 | 24.4879 | 24.0239 | 24.8806 | 23.7707 | 24.6124 | 24.6568 | 25.2913 | NaN     | 24.8413 | 25.2656 | Q9Y5J7;G3V2F3;G Q9Y5J7;G3V2F3;G  | Mitochondrial im    | TIMM9           |
|     | 24.0789 | 26.3122 | 24.3268 | 23.6707 | 25.1491 | 23.7385 | 27.5227 | 27.4084 | 27.0881 | 25.3052 | NaN     | 25.6372 | P01033;Q5H9A7;C P01033;Q5H9A7;C  | Metalloproteinase   | TIMP1           |
|     | 25.5311 | 26.9732 | 26.4089 | 25.3457 | 26.2444 | 26.2667 | 28.8268 | 28.9023 | 28.5232 | 25.8015 | 26.4514 | 27.0337 | P16035;B4DFW2;I P16035;B4DFW2    | Metalloproteinase   | TIMP2           |
|     | 24.5694 | 23.6126 | 24.8141 | 24.9444 | 24.1417 | 24.4715 | 27.6747 | 26.9909 | 27.4394 | 27.7788 | 26.9436 | 26.5241 | P35625 P35625                    | Metalloproteinase   | TIMP3           |
|     | 23.7808 | 25.0903 | 25.6486 | 22.403  | 23.5609 | 24.0404 | 27.5137 | 26.6907 | 25.8378 | 24.3803 | 24.3116 | 24.5728 | Q9GZM7;Q9GZM Q9GZM7;Q9GZM        | Tubulointerstitial  | TINAGL1         |
|     | 25.4506 | 25.5933 | 25.5499 | 25.2932 | 25.2232 | 25.9945 | 25.7772 | NaN     | 25.3388 | 25.7696 | 25.7443 | 26.1144 | O75663;O75663-2 O75663;O75663-2  | TIP41-like protein  | TIPRL           |
|     | 24.587  | 23.9969 | 23.8984 | 24.334  | 23.8877 | 23.5289 | 24.0722 | NaN     | NaN     | NaN     | 23.5323 | NaN     | Q5JTD0;Q5JTD0-2 Q5JTD0;Q5JTD0-2  | Tight junction-ass  | TJAP1           |
|     | 27.3376 | 27.3975 | 27.3512 | 27.0349 | 27.3576 | 27.4956 | 27.3913 | 27.0999 | 27.3057 | 27.3993 | 27.3125 | 27.393  | Q07157-2;A0A08 Q07157-2;A0A08    | Tight junction pro  | TJP1            |



|         |         |         |         |         |         |         |         |         |         |         |         |                                   |                                   |                        |                |
|---------|---------|---------|---------|---------|---------|---------|---------|---------|---------|---------|---------|-----------------------------------|-----------------------------------|------------------------|----------------|
| 28.5444 | 28.8739 | 28.7903 | 28.3802 | 28.6549 | 28.7423 | 29.1297 | 28.9833 | 28.795  | 28.6847 | 28.5951 | 28.7924 | Q9UDY2;Q9UDY2                     | Q9UDY2;Q9UDY2                     | Tight junction pro     | TJP2           |
| 24.9119 | 24.7302 | 25.2098 | 25.2101 | 25.417  | 25.5907 | 24.5013 | NaN     | 25.2457 | 24.8023 | 25.3851 | 25.5235 | P04183;K7ERV3;K                   | P04183;K7ERV3;K                   | Thymidine kinase       | TK1            |
| 30.5465 | 31.7264 | 31.0415 | 30.6473 | 31.9482 | 31.2831 | 31.7139 | 31.8824 | 31.922  | 32.0233 | 32.2741 | 32.5892 | P29401;P29401-2                   | P29401;P29401-2                   | Transketolase          | TKT            |
| 27.1633 | 27.3635 | 27.6216 | 26.6742 | 27.1726 | 27.5207 | 28.2402 | 28.3016 | 28.6821 | 27.9238 | 28.0586 | 28.4211 | Q6P9B6;H3BM75; Q6P9B6;H3BM75;     | Q6P9B6;H3BM75; Q6P9B6;H3BM75;     | TLD domain-conte       | TLD1           |
| 22.197  | 22.9278 | 22.3158 | 22.222  | 22.9342 | NaN     | NaN     | NaN     | NaN     | 22.3436 | 22.9841 | NaN     | Q04726;Q04726-; Q04726;Q04726-;   | Q04726;Q04726-; Q04726;Q04726-;   | Transducin-like er     | TLE3;TLE4;TLE1 |
| NaN     | 20.7759 | NaN     | NaN     | Q9UKI8-2;Q9UKI8                   | Q9UKI8-2;Q9UKI8                   | Serine/threonine- TLK1 |                |
| NaN     | NaN     | 22.5936 | NaN     | 22.8846 | NaN     | Q86UE8;Q86UE8- Q86UE8;Q86UE8-     | Q86UE8;Q86UE8- Q86UE8;Q86UE8-     | Serine/threonine- TLK2 |                |
| 31.0097 | 31.6102 | 31.5225 | 30.6547 | 31.3925 | 31.269  | 31.749  | 31.9156 | 31.579  | 31.2392 | 31.2514 | 31.5763 | Q9Y490                            | Q9Y490                            | Talin-1                | TLN1           |
| 23.0492 | NaN     | 22.7918 | 23.152  | 22.6975 | NaN     | NaN     | 23.0557 | NaN     | 23.1255 | 22.6473 | NaN     | Q9Y4G6;H0YMT1; Q9Y4G6;H0YMT1;     | Q9Y4G6;H0YMT1; Q9Y4G6;H0YMT1;     | Talin-2                | TLN2           |
| NaN     | NaN     | NaN     | NaN     | NaN     | 20.8294 | NaN     | NaN     | NaN     | NaN     | NaN     | NaN     | O60603                            | O60603                            | Toll-like receptor     | TLR2           |
| 25.8853 | NaN     | 25.3522 | 24.6367 | NaN     | 24.5181 | 27.485  | NaN     | NaN     | 26.1519 | 24.9052 | NaN     | F8WF27;F8WBG6; F8WF27;F8WBG6;     | F8WF27;F8WBG6; F8WF27;F8WBG6;     | Transmembrane          | TM45F1         |
| 26.697  | 26.403  | 26.4874 | 26.223  | 25.9948 | 26.136  | 26.8301 | 25.0365 | 26.1697 | 26.3587 | 25.5678 | 26.8866 | Q99805                            | Q99805                            | Transmembrane          | TM95F2         |
| 28.7793 | 28.044  | 28.6453 | 28.7774 | 27.8345 | 28.5819 | 27.963  | 27.4014 | 27.9508 | 28.1377 | 27.8385 | 26.9793 | Q9HD45;Q5TB53                     | Q9HD45;Q5TB53                     | Transmembrane          | TM95F3         |
| 26.9739 | 25.4602 | 25.9289 | 26.5427 | 25.2139 | 25.915  | 26.2838 | NaN     | 24.0241 | 25.8885 | 24.7659 | 25.0413 | Q92544;A0A0C4D Q92544;A0A0C4D     | Q92544;A0A0C4D Q92544;A0A0C4D     | Transmembrane          | TM95F4         |
| 23.539  | NaN     | NaN     | 23.7046 | NaN     | Q96EY4;H0Y9X1;C Q96EY4;H0Y9X1;C   | Q96EY4;H0Y9X1;C Q96EY4;H0Y9X1;C   | Translation machi      | TMA16          |
| 25.6606 | 27.6855 | 26.0826 | 25.6442 | 27.2645 | 25.8239 | 27.0217 | 27.9542 | NaN     | 26.4632 | 27.172  | 26.6637 | Q9Y256                            | Q9Y256                            | Translation machi      | TMA7           |
| 22.9736 | 22.5074 | 22.8533 | 22.6517 | 23.2394 | 22.6933 | 22.7654 | NaN     | NaN     | 23.4161 | NaN     | NaN     | Q969X1;C9JEN3;C Q969X1;C9JEN3;C   | Q969X1;C9JEN3;C Q969X1;C9JEN3;C   | Protein lifeguard      | TMBIM1         |
| 24.1303 | 23.5651 | 24.8182 | 24.3278 | 22.6465 | 24.8698 | NaN     | NaN     | 23.9396 | 23.9749 | NaN     | 23.3262 | Q7Z403;K7ERH0;C Q7Z403;K7ERH0;C   | Q7Z403;K7ERH0;C Q7Z403;K7ERH0;C   | Transmembrane          | TM6            |
| 22.2236 | 22.2259 | 22.788  | 22.7874 | NaN     | 22.7626 | NaN     | NaN     | NaN     | NaN     | NaN     | NaN     | Q8IU68;K7EJ72;Q Q8IU68;K7EJ72     | Q8IU68;K7EJ72;Q Q8IU68;K7EJ72     | Transmembrane          | TM6            |
| 25.0496 | 24.4017 | 24.517  | 25.0597 | 24.4459 | 24.6559 | 25.4576 | 25.2613 | 25.2347 | 25.4764 | 24.7466 | NaN     | Q9UM00;J9IIE6;Q Q9UM00;J9IIE6;Q   | Q9UM00;J9IIE6;Q Q9UM00;J9IIE6;Q   | Transmembrane          | TMCO1          |
| 23.506  | NaN     | 22.7369 | NaN     | NaN     | Q13445;K7EIN4;K Q13445;K7EIN4;K   | Q13445;K7EIN4;K Q13445;K7EIN4;K   | Transmembrane          | TMED1          |
| 30.1269 | 30.0335 | 30.1087 | 30.1958 | 29.9004 | 30.3011 | 29.2713 | 29.3722 | 30.0038 | 29.0964 | 29.2725 | 29.4503 | P49755;G3V2K7 P49755              | P49755;G3V2K7 P49755              | Transmembrane          | TMED10         |
| 27.1537 | 25.3617 | 25.9199 | 26.5386 | 25.117  | 24.9195 | 25.5381 | NaN     | 24.1857 | 25.2571 | 24.5326 | 24.0558 | Q15363;E7EQ72;F Q15363;E7EQ72;F   | Q15363;E7EQ72;F Q15363;E7EQ72;F   | Transmembrane          | TMED2          |
| 24.2907 | 23.5505 | 22.8139 | 24.605  | 23.3675 | NaN     | Q9Y3Q3;G3V1J9;f Q9Y3Q3;G3V1J9;f   | Q9Y3Q3;G3V1J9;f Q9Y3Q3;G3V1J9;f   | Transmembrane          | TMED3          |
| 26.9308 | 27.1074 | 26.6002 | 26.6946 | 27.0879 | 26.8684 | 25.4227 | 25.9426 | 26.5492 | 25.6822 | 25.7185 | 25.5383 | Q7Z7H5;Q7Z7H5- Q7Z7H5;Q7Z7H5-     | Q7Z7H5;Q7Z7H5- Q7Z7H5;Q7Z7H5-     | Transmembrane          | TMED4          |
| 26.0742 | 25.7872 | 25.8875 | 25.9844 | 25.9252 | 26.0108 | 26.0828 | 26.5521 | 26.5908 | 26.3016 | 25.7562 | 25.8201 | Q9Y3A6;M0R072; Q9Y3A6             | Q9Y3A6;M0R072; Q9Y3A6             | Transmembrane          | TMED5          |
| 28.2385 | 27.8748 | 27.7747 | 28.0016 | 27.3892 | 27.8927 | 26.9068 | 26.4189 | 26.5776 | 26.8064 | 26.6447 | 26.6768 | Q9Y3B3                            | Q9Y3B3                            | Transmembrane          | TMED7          |
| 28.1943 | 28.0985 | 28.1141 | 28.3299 | 27.683  | 28.3117 | 27.7361 | 27.0412 | 28.1381 | 27.4672 | 26.9638 | 27.7641 | Q9BVK6                            | Q9BVK6                            | Transmembrane          | TMED9          |
| 26.0216 | 25.6183 | 26.1047 | 25.7899 | 25.4031 | 26.0795 | 25.1943 | 25.1757 | 26.576  | 25.1449 | 25.2522 | 26.2102 | Q9NUM4;C9JZ87; Q9NUM4;C9JZ87;     | Q9NUM4;C9JZ87; Q9NUM4;C9JZ87;     | Transmembrane          | TMEM106B       |
| 26.6071 | 26.0968 | 26.5889 | 26.8339 | 26.557  | 26.6579 | 26.9786 | 27.5041 | 28.1545 | 26.9675 | 27.0127 | 26.8224 | Q9BVC6                            | Q9BVC6                            | Transmembrane          | TMEM109        |
| NaN     | NaN     | NaN     | 22.7651 | NaN     | Q12893                            | Q12893                            | Transmembrane          | TMEM115        |
| 24.5579 | 25.5092 | 25.1733 | 24.6014 | 24.8757 | 25.2488 | 25.5083 | 24.8398 | NaN     | NaN     | NaN     | NaN     | Q8N131;E9PKT4;C Q8N131;E9PKT4;C   | Q8N131;E9PKT4;C Q8N131;E9PKT4;C   | Porin                  | TMEM123        |
| NaN     | 27.1558 | 25.808  | NaN     | 23.2701 | Q9NP10;J3QSZ6 Q9NP10;J3QSZ6       | Q9NP10;J3QSZ6 Q9NP10;J3QSZ6       | Transmembrane          | TMEM138        |
| NaN     | NaN     | NaN     | 22.0039 | NaN     | Q96B96;J3NI21;J3 Q96B96;J3NI21;J3 | Q96B96;J3NI21;J3 Q96B96;J3NI21;J3 | Promethin              | TMEM159        |
| NaN     | 20.5629 | Q9NX61;K7EQE7;I Q9NX61;K7EQE7;I   | Q9NX61;K7EQE7;I Q9NX61;K7EQE7;I   | Transmembrane          | TMEM161A       |
| 23.7788 | NaN     | 23.7435 | 23.7961 | NaN     | 23.819  | 23.6315 | NaN     | NaN     | 24.0028 | 23.2574 | NaN     | Q9HC07;V9GY93;I Q9HC07;V9GY93;I   | Q9HC07;V9GY93;I Q9HC07;V9GY93;I   | Transmembrane          | TMEM165        |
| 22.1161 | NaN     | 21.3166 | NaN     | Q7Z7N9;G3V185 Q7Z7N9;G3V185       | Q7Z7N9;G3V185 Q7Z7N9;G3V185       | Transmembrane          | TMEM179B       |
| 25.009  | 23.4903 | 23.834  | 24.2847 | 23.1756 | NaN     | Q9P2C4                            | Q9P2C4                            | Transmembrane          | TMEM181        |
| NaN     | 21.1975 | Q96HH6;F8VRE8;f Q96HH6;F8VRE8;f   | Q96HH6;F8VRE8;f Q96HH6;F8VRE8;f   | Transmembrane          | TMEM19         |
| 25.8059 | 25.4609 | 26.3808 | 26.3713 | 25.7131 | 26.6256 | 25.9188 | NaN     | 25.7483 | 26.3297 | 25.9335 | 26.1481 | Q9UHN6;Q9UHN6 Q9UHN6;Q9UHN6       | Q9UHN6;Q9UHN6 Q9UHN6;Q9UHN6       | Transmembrane          | TMEM2          |
| 24.5976 | 24.1106 | 24.8201 | 24.8029 | 24.6164 | 24.6407 | 24.7597 | NaN     | NaN     | 24.4312 | NaN     | NaN     | Q6UW68;K7EM05 Q6UW68;K7EM05       | Q6UW68;K7EM05 Q6UW68;K7EM05       | Transmembrane          | TMEM205        |
| 23.6757 | 23.3471 | 23.9869 | 24.3943 | NaN     | 23.8073 | NaN     | NaN     | NaN     | 23.6731 | NaN     | NaN     | Q9H813;Q9H813- Q9H813;Q9H813-     | Q9H813;Q9H813- Q9H813;Q9H813-     | Transmembrane          | TMEM206        |
| 23.0813 | NaN     | 23.3741 | 22.8131 | NaN     | NaN     | NaN     | NaN     | NaN     | 22.4948 | NaN     | NaN     | Q9H0R3;H0Y870;I Q9H0R3;H0Y870;I   | Q9H0R3;H0Y870;I Q9H0R3;H0Y870;I   | Transmembrane          | TMEM222        |
| 24.1399 | NaN     | 23.4519 | NaN     | NaN     | Q96A57;Q96A57- Q96A57;Q96A57-     | Q96A57;Q96A57- Q96A57;Q96A57-     | Transmembrane          | TMEM230        |
| 24.6139 | 25.6258 | 25.3219 | 24.6794 | 25.149  | 25.3288 | 25.2985 | NaN     | 25.6877 | 25.7575 | 25.6803 | 25.2742 | Q96Q45;Q96Q45- Q96Q45;Q96Q45-     | Q96Q45;Q96Q45- Q96Q45;Q96Q45-     | Transmembrane          | TMEM237        |
| 28.6478 | 28.5125 | 28.6274 | 29.0332 | NaN     | NaN     | 28.4854 | NaN     | NaN     | 29.4693 | NaN     | NaN     | Q9H330;Q9H330- Q9H330;Q9H330-     | Q9H330;Q9H330- Q9H330;Q9H330-     | Transmembrane          | TMEM245        |
| 25.8713 | 25.8197 | 25.9782 | 25.2972 | 25.1309 | 25.0861 | 24.8255 | 24.3846 | NaN     | 24.6519 | 24.2394 | 24.5547 | Q8WUH6                            | Q8WUH6                            | Transmembrane          | TMEM263        |
| 26.9214 | 27.0052 | 27.5508 | 27.3297 | 27.3349 | 27.7373 | 27.0566 | 26.9698 | 27.3194 | 27.4457 | 27.2194 | 27.4088 | Q9NV96;Q9NV96- Q9NV96;Q9NV96-     | Q9NV96;Q9NV96- Q9NV96;Q9NV96-     | Cell cycle control     | TMEM30A        |
| 26.6098 | 25.4884 | 26.0581 | 26.4546 | 25.2716 | 25.9699 | 26.0561 | 25.4252 | 26.1174 | 26.5879 | 25.8565 | 25.4707 | P57088;D6RAA6;f P57088;D6RAA6;f   | P57088;D6RAA6;f P57088;D6RAA6;f   | Transmembrane          | TMEM33         |
| 24.3458 | 24.3429 | 25.0543 | 24.3613 | 24.1039 | 24.7872 | 23.6482 | NaN     | NaN     | 23.5724 | 23.8217 | NaN     | Q5BJD5;E9PJ42;Q Q5BJD5;E9PJ42;Q   | Q5BJD5;E9PJ42;Q Q5BJD5;E9PJ42;Q   | Transmembrane          | TMEM41B        |
| 25.6788 | 26.0841 | 26.3709 | 26.3007 | 26.3291 | 26.5394 | 27.5816 | 27.608  | 28.5733 | 27.718  | 27.4376 | 28.0022 | Q9BTV4;V9GY05 Q9BTV4              | Q9BTV4;V9GY05 Q9BTV4              | Transmembrane          | TMEM43         |
| NaN     | NaN     | 22.4782 | NaN     | NaN     | 22.0786 | NaN     | NaN     | NaN     | NaN     | 22.3402 | 22.9972 | Q9NW97                            | Q9NW97                            | Transmembrane          | TMEM51         |
| 24.9317 | 24.8703 | 24.9941 | 24.7119 | 24.6957 | 24.2352 | 24.6565 | NaN     | 26.299  | 24.3488 | 23.8725 | 24.9712 | Q9BX54;Q5T6Z8;C Q9BX54;Q5T6Z8;C   | Q9BX54;Q5T6Z8;C Q9BX54;Q5T6Z8;C   | Transmembrane          | TMEM59         |
| 22.3328 | 22.3899 | 23.1088 | NaN     | 22.7538 | NaN     | O94886;Q2HI28;X O94886            | O94886;Q2HI28;X O94886            | CSC1-like protein      | TMEM63A        |
| 23.8306 | 23.7154 | 24.0738 | 24.0191 | 24.121  | 24.6451 | NaN     | NaN     | NaN     | NaN     | NaN     | NaN     | Q5T3F8;H0YCP6;f Q5T3F8;H0YCP6;f   | Q5T3F8;H0YCP6;f Q5T3F8;H0YCP6;f   | CSC1-like protein      | TMEM63B        |
| 25.4901 | 25.0811 | 25.5775 | 25.7608 | 25.2216 | 25.7185 | 25.737  | NaN     | 24.9159 | 24.7806 | 24.7596 | 24.3419 | Q8NBN3;Q8NBN3 Q8NBN3;Q8NBN3       | Q8NBN3;Q8NBN3 Q8NBN3;Q8NBN3       | Transmembrane          | TMEM87A        |
| NaN     | NaN     | 22.0354 | NaN     | Q9HCN3;K4DI83 Q9HCN3              | Q9HCN3;K4DI83 Q9HCN3              | Transmembrane          | TMEM8A         |
| NaN     | 23.4891 | 24.361  | 23.6241 | 23.7624 | 23.919  | NaN     | NaN     | NaN     | NaN     | NaN     | NaN     | Q9P0T7;B1ALM5 Q9P0T7;B1ALM5       | Q9P0T7;B1ALM5 Q9P0T7;B1ALM5       | Transmembrane          | TMEM9          |
| 24.1338 | NaN     | 23.719  | 24.6269 | 22.5693 | 23.5443 | NaN     | NaN     | NaN     | 25.0191 | 24.0189 | NaN     | Q5BJF2;J3KT68;Q Q5BJF2;J3KT68     | Q5BJF2;J3KT68;Q Q5BJF2;J3KT68     | Transmembrane          | TMEM97         |
| 22.8894 | NaN     | 23.9021 | 23.5023 | 23.269  | 23.8848 | NaN     | NaN     | NaN     | NaN     | NaN     | NaN     | Q9NQ34;Q9NQ34 Q9NQ34;Q9NQ34       | Q9NQ34;Q9NQ34 Q9NQ34;Q9NQ34       | Transmembrane          | TMEM98         |



|         |         |  |         |     |         |         |         |         |         |         |         |         |         |                                                                                                                                                                                                                                                                                                                                                                                                                                                                                                                                                                                                                                                                                                                                                                                                                                                                                                                                                                                                                                                                                                                                                                                                                                                                                                                                                                                                                                                                                                                                                                                                                                                                                                                                                                                                                                                                                                                                                                                                                                                                                                                                                                                                                                                                                                                                                                                                                                                                                                                                                                                                                                                                                                                                                                                                                                                                                                                                                                                                                                                                                                                                                                                                                                                                                                                                                                                                                                                                                                                                                                                                                                                                                                                                                                                                                                                                                                                                                                                                                                                                                                                                                                                                                                                                                                                                                                                                                                                                                                                                                                                                                                                                                                                                                                                                                                                                                                                                                                                                                                                                                                                                                                                                                                                                                                                                                                                                                                                                                                                                                                                                                                                                                                                                                                                                                                                                                                                                                                                                                                            |                                              |                   |         |
|---------|---------|--|---------|-----|---------|---------|---------|---------|---------|---------|---------|---------|---------|--------------------------------------------------------------------------------------------------------------------------------------------------------------------------------------------------------------------------------------------------------------------------------------------------------------------------------------------------------------------------------------------------------------------------------------------------------------------------------------------------------------------------------------------------------------------------------------------------------------------------------------------------------------------------------------------------------------------------------------------------------------------------------------------------------------------------------------------------------------------------------------------------------------------------------------------------------------------------------------------------------------------------------------------------------------------------------------------------------------------------------------------------------------------------------------------------------------------------------------------------------------------------------------------------------------------------------------------------------------------------------------------------------------------------------------------------------------------------------------------------------------------------------------------------------------------------------------------------------------------------------------------------------------------------------------------------------------------------------------------------------------------------------------------------------------------------------------------------------------------------------------------------------------------------------------------------------------------------------------------------------------------------------------------------------------------------------------------------------------------------------------------------------------------------------------------------------------------------------------------------------------------------------------------------------------------------------------------------------------------------------------------------------------------------------------------------------------------------------------------------------------------------------------------------------------------------------------------------------------------------------------------------------------------------------------------------------------------------------------------------------------------------------------------------------------------------------------------------------------------------------------------------------------------------------------------------------------------------------------------------------------------------------------------------------------------------------------------------------------------------------------------------------------------------------------------------------------------------------------------------------------------------------------------------------------------------------------------------------------------------------------------------------------------------------------------------------------------------------------------------------------------------------------------------------------------------------------------------------------------------------------------------------------------------------------------------------------------------------------------------------------------------------------------------------------------------------------------------------------------------------------------------------------------------------------------------------------------------------------------------------------------------------------------------------------------------------------------------------------------------------------------------------------------------------------------------------------------------------------------------------------------------------------------------------------------------------------------------------------------------------------------------------------------------------------------------------------------------------------------------------------------------------------------------------------------------------------------------------------------------------------------------------------------------------------------------------------------------------------------------------------------------------------------------------------------------------------------------------------------------------------------------------------------------------------------------------------------------------------------------------------------------------------------------------------------------------------------------------------------------------------------------------------------------------------------------------------------------------------------------------------------------------------------------------------------------------------------------------------------------------------------------------------------------------------------------------------------------------------------------------------------------------------------------------------------------------------------------------------------------------------------------------------------------------------------------------------------------------------------------------------------------------------------------------------------------------------------------------------------------------------------------------------------------------------------------------------------------------------------------------------------------------------------|----------------------------------------------|-------------------|---------|
| 23.0489 | NaN     |  | 23.1916 |     | 22.6813 | NaN     | P82094;A0A0A0V P82094;A0A0A0M TATA element mo                                                                                                                                                                                                                                                                                                                                                                                                                                                                                                                                                                                                                                                                                                                                                                                                                                                                                                                                                                                                                                                                                                                                                                                                                                                                                                                                                                                                                                                                                                                                                                                                                                                                                                                                                                                                                                                                                                                                                                                                                                                                                                                                                                                                                                                                                                                                                                                                                                                                                                                                                                                                                                                                                                                                                                                                                                                                                                                                                                                                                                                                                                                                                                                                                                                                                                                                                                                                                                                                                                                                                                                                                                                                                                                                                                                                                                                                                                                                                                                                                                                                                                                                                                                                                                                                                                                                                                                                                                                                                                                                                                                                                                                                                                                                                                                                                                                                                                                                                                                                                                                                                                                                                                                                                                                                                                                                                                                                                                                                                                                                                                                                                                                                                                                                                                                                                                                                                                                                                                                              | TMF1                                         |                   |         |
| 27.4661 | 27.9018 |  | 27.4634 |     | 27.3506 | 27.9247 |         | 27.5676 | 26.5429 | 27.5368 | 27.5029 | 26.2025 | 27.0208 | 27.223                                                                                                                                                                                                                                                                                                                                                                                                                                                                                                                                                                                                                                                                                                                                                                                                                                                                                                                                                                                                                                                                                                                                                                                                                                                                                                                                                                                                                                                                                                                                                                                                                                                                                                                                                                                                                                                                                                                                                                                                                                                                                                                                                                                                                                                                                                                                                                                                                                                                                                                                                                                                                                                                                                                                                                                                                                                                                                                                                                                                                                                                                                                                                                                                                                                                                                                                                                                                                                                                                                                                                                                                                                                                                                                                                                                                                                                                                                                                                                                                                                                                                                                                                                                                                                                                                                                                                                                                                                                                                                                                                                                                                                                                                                                                                                                                                                                                                                                                                                                                                                                                                                                                                                                                                                                                                                                                                                                                                                                                                                                                                                                                                                                                                                                                                                                                                                                                                                                                                                                                                                     | Q9NYL9;HOYKU1; Q9NYL9;HOYKU1; Tropomodulin-3 | TMOD3             |         |
| 28.023  | 27.5186 |  | 27.144  |     | 27.6258 | 27.1    | 27.2471 | 27.0225 | 27.4301 | 26.0957 | 27.6324 | 27.4407 | 27.7447 | 27.3568                                                                                                                                                                                                                                                                                                                                                                                                                                                                                                                                                                                                                                                                                                                                                                                                                                                                                                                                                                                                                                                                                                                                                                                                                                                                                                                                                                                                                                                                                                                                                                                                                                                                                                                                                                                                                                                                                                                                                                                                                                                                                                                                                                                                                                                                                                                                                                                                                                                                                                                                                                                                                                                                                                                                                                                                                                                                                                                                                                                                                                                                                                                                                                                                                                                                                                                                                                                                                                                                                                                                                                                                                                                                                                                                                                                                                                                                                                                                                                                                                                                                                                                                                                                                                                                                                                                                                                                                                                                                                                                                                                                                                                                                                                                                                                                                                                                                                                                                                                                                                                                                                                                                                                                                                                                                                                                                                                                                                                                                                                                                                                                                                                                                                                                                                                                                                                                                                                                                                                                                                                    | P42166;P42167-3 P42166                       | Lamina-associater | TMPO    |
| 25.997  | 25.1011 |  | 25.6354 |     | 25.9754 | 25.4842 | 25.7911 | 24.7208 | NaN     | 25.01   | 25.3611 | 24.0802 | 24.869  | P42167;G5E972;P P42167;G5E972;P                                                                                                                                                                                                                                                                                                                                                                                                                                                                                                                                                                                                                                                                                                                                                                                                                                                                                                                                                                                                                                                                                                                                                                                                                                                                                                                                                                                                                                                                                                                                                                                                                                                                                                                                                                                                                                                                                                                                                                                                                                                                                                                                                                                                                                                                                                                                                                                                                                                                                                                                                                                                                                                                                                                                                                                                                                                                                                                                                                                                                                                                                                                                                                                                                                                                                                                                                                                                                                                                                                                                                                                                                                                                                                                                                                                                                                                                                                                                                                                                                                                                                                                                                                                                                                                                                                                                                                                                                                                                                                                                                                                                                                                                                                                                                                                                                                                                                                                                                                                                                                                                                                                                                                                                                                                                                                                                                                                                                                                                                                                                                                                                                                                                                                                                                                                                                                                                                                                                                                                                            | Lamina-associater                            | TMPO              |         |
| NaN     | NaN     |  |         |     | 20.7216 | NaN                                                                                                                                                                                                                                                                                                                                                                                                                                                                                                                                                                                                                                                                                                                                                                                                                                                                                                                                                                                                                                                                                                                                                                                                                                                                                                                                                                                                                                                                                                                                                                                                                                                                                                                                                                                                                                                                                                                                                                                                                                                                                                                                                                                                                                                                                                                                                                                                                                                                                                                                                                                                                                                                                                                                                                                                                                                                                                                                                                                                                                                                                                                                                                                                                                                                                                                                                                                                                                                                                                                                                                                                                                                                                                                                                                                                                                                                                                                                                                                                                                                                                                                                                                                                                                                                                                                                                                                                                                                                                                                                                                                                                                                                                                                                                                                                                                                                                                                                                                                                                                                                                                                                                                                                                                                                                                                                                                                                                                                                                                                                                                                                                                                                                                                                                                                                                                                                                                                                                                                                                                        | NaN                                          | NaN               | NaN     |
| 29.7122 | 29.5379 |  | 29.3512 |     | 29.0092 | 28.7381 | 29.2112 | 29.8502 | 28.997  | 28.192  | 29.6993 | 29.5174 | 29.1937 | P63313                                                                                                                                                                                                                                                                                                                                                                                                                                                                                                                                                                                                                                                                                                                                                                                                                                                                                                                                                                                                                                                                                                                                                                                                                                                                                                                                                                                                                                                                                                                                                                                                                                                                                                                                                                                                                                                                                                                                                                                                                                                                                                                                                                                                                                                                                                                                                                                                                                                                                                                                                                                                                                                                                                                                                                                                                                                                                                                                                                                                                                                                                                                                                                                                                                                                                                                                                                                                                                                                                                                                                                                                                                                                                                                                                                                                                                                                                                                                                                                                                                                                                                                                                                                                                                                                                                                                                                                                                                                                                                                                                                                                                                                                                                                                                                                                                                                                                                                                                                                                                                                                                                                                                                                                                                                                                                                                                                                                                                                                                                                                                                                                                                                                                                                                                                                                                                                                                                                                                                                                                                     | P63313                                       | Thymosin beta-10  | TMSB10  |
| 30.6189 | 30.2417 |  | 30.3168 |     | 29.8517 | 29.4644 | 30.3012 | 31.6287 | 29.6966 | 29.2127 | 31.6262 | 30.4889 | 29.8368 | P62328                                                                                                                                                                                                                                                                                                                                                                                                                                                                                                                                                                                                                                                                                                                                                                                                                                                                                                                                                                                                                                                                                                                                                                                                                                                                                                                                                                                                                                                                                                                                                                                                                                                                                                                                                                                                                                                                                                                                                                                                                                                                                                                                                                                                                                                                                                                                                                                                                                                                                                                                                                                                                                                                                                                                                                                                                                                                                                                                                                                                                                                                                                                                                                                                                                                                                                                                                                                                                                                                                                                                                                                                                                                                                                                                                                                                                                                                                                                                                                                                                                                                                                                                                                                                                                                                                                                                                                                                                                                                                                                                                                                                                                                                                                                                                                                                                                                                                                                                                                                                                                                                                                                                                                                                                                                                                                                                                                                                                                                                                                                                                                                                                                                                                                                                                                                                                                                                                                                                                                                                                                     | P62328                                       | Thymosin beta-4;1 | TMSB4X  |
| NaN     | NaN     |  | 21.7939 | NaN |         | NaN                                                                                                                                                                                                                                                                                                                                                                                                                                                                                                                                                                                                                                                                                                                                                                                                                                                                                                                                                                                                                                                                                                                                                                                                                                                                                                                                                                                                                                                                                                                                                                                                                                                                                                                                                                                                                                                                                                                                                                                                                                                                                                                                                                                                                                                                                                                                                                                                                                                                                                                                                                                                                                                                                                                                                                                                                                                                                                                                                                                                                                                                                                                                                                                                                                                                                                                                                                                                                                                                                                                                                                                                                                                                                                                                                                                                                                                                                                                                                                                                                                                                                                                                                                                                                                                                                                                                                                                                                                                                                                                                                                                                                                                                                                                                                                                                                                                                                                                                                                                                                                                                                                                                                                                                                                                                                                                                                                                                                                                                                                                                                                                                                                                                                                                                                                                                                                                                                                                                                                                                                                        | NaN                                          | NaN               | NaN     |
| 27.3927 | 26.5195 |  | 26.7725 |     | 27.6204 | 26.4138 | 26.7496 | 27.7254 | 27.0739 | 27.1135 | 27.5927 | 27.029  | 26.6885 | Q9H3N1;G3V448                                                                                                                                                                                                                                                                                                                                                                                                                                                                                                                                                                                                                                                                                                                                                                                                                                                                                                                                                                                                                                                                                                                                                                                                                                                                                                                                                                                                                                                                                                                                                                                                                                                                                                                                                                                                                                                                                                                                                                                                                                                                                                                                                                                                                                                                                                                                                                                                                                                                                                                                                                                                                                                                                                                                                                                                                                                                                                                                                                                                                                                                                                                                                                                                                                                                                                                                                                                                                                                                                                                                                                                                                                                                                                                                                                                                                                                                                                                                                                                                                                                                                                                                                                                                                                                                                                                                                                                                                                                                                                                                                                                                                                                                                                                                                                                                                                                                                                                                                                                                                                                                                                                                                                                                                                                                                                                                                                                                                                                                                                                                                                                                                                                                                                                                                                                                                                                                                                                                                                                                                              | Q9H3N1                                       | Thioredoxin-relat | TMX1    |
| 23.5842 | 22.9305 |  | 23.4927 |     | 23.1463 | 23.27   | NaN     | 24.293  | 24.9793 | 23.4925 | 25.0129 | 24.0709 | 23.5156 | Q9Y320;Q9Y320-2 Q9Y320;Q9Y320-2                                                                                                                                                                                                                                                                                                                                                                                                                                                                                                                                                                                                                                                                                                                                                                                                                                                                                                                                                                                                                                                                                                                                                                                                                                                                                                                                                                                                                                                                                                                                                                                                                                                                                                                                                                                                                                                                                                                                                                                                                                                                                                                                                                                                                                                                                                                                                                                                                                                                                                                                                                                                                                                                                                                                                                                                                                                                                                                                                                                                                                                                                                                                                                                                                                                                                                                                                                                                                                                                                                                                                                                                                                                                                                                                                                                                                                                                                                                                                                                                                                                                                                                                                                                                                                                                                                                                                                                                                                                                                                                                                                                                                                                                                                                                                                                                                                                                                                                                                                                                                                                                                                                                                                                                                                                                                                                                                                                                                                                                                                                                                                                                                                                                                                                                                                                                                                                                                                                                                                                                            | Thioredoxin-relat                            | TMX2              |         |
| NaN     | 23.0394 |  | 23.0029 |     | 22.7505 | 23.0793 | 22.9539 | 23.2111 | NaN     | NaN     | 22.3473 | NaN     | 23.277  | Q96J17;Q96J17-2; Q96J17;Q96J17-2                                                                                                                                                                                                                                                                                                                                                                                                                                                                                                                                                                                                                                                                                                                                                                                                                                                                                                                                                                                                                                                                                                                                                                                                                                                                                                                                                                                                                                                                                                                                                                                                                                                                                                                                                                                                                                                                                                                                                                                                                                                                                                                                                                                                                                                                                                                                                                                                                                                                                                                                                                                                                                                                                                                                                                                                                                                                                                                                                                                                                                                                                                                                                                                                                                                                                                                                                                                                                                                                                                                                                                                                                                                                                                                                                                                                                                                                                                                                                                                                                                                                                                                                                                                                                                                                                                                                                                                                                                                                                                                                                                                                                                                                                                                                                                                                                                                                                                                                                                                                                                                                                                                                                                                                                                                                                                                                                                                                                                                                                                                                                                                                                                                                                                                                                                                                                                                                                                                                                                                                           | Protein disulfide-                           | TMX3              |         |
| 24.1223 | 24.0526 |  | 23.3951 | NaN |         | NaN     | NaN     | 30.7174 | NaN     | 30.6189 | 29.1581 | 24.9469 | 26.3318 | 27.0392                                                                                                                                                                                                                                                                                                                                                                                                                                                                                                                                                                                                                                                                                                                                                                                                                                                                                                                                                                                                                                                                                                                                                                                                                                                                                                                                                                                                                                                                                                                                                                                                                                                                                                                                                                                                                                                                                                                                                                                                                                                                                                                                                                                                                                                                                                                                                                                                                                                                                                                                                                                                                                                                                                                                                                                                                                                                                                                                                                                                                                                                                                                                                                                                                                                                                                                                                                                                                                                                                                                                                                                                                                                                                                                                                                                                                                                                                                                                                                                                                                                                                                                                                                                                                                                                                                                                                                                                                                                                                                                                                                                                                                                                                                                                                                                                                                                                                                                                                                                                                                                                                                                                                                                                                                                                                                                                                                                                                                                                                                                                                                                                                                                                                                                                                                                                                                                                                                                                                                                                                                    | P24821;E9PC84;P P24821;E9PC84;P              | Tenascin          | TNC     |
| 24.9697 | 25.0005 |  | 25.6397 |     | 24.8743 | 25.1695 | 25.4048 | NaN     | NaN     | NaN     | 25.0346 | 25.5429 | 24.8213 | 24.5075                                                                                                                                                                                                                                                                                                                                                                                                                                                                                                                                                                                                                                                                                                                                                                                                                                                                                                                                                                                                                                                                                                                                                                                                                                                                                                                                                                                                                                                                                                                                                                                                                                                                                                                                                                                                                                                                                                                                                                                                                                                                                                                                                                                                                                                                                                                                                                                                                                                                                                                                                                                                                                                                                                                                                                                                                                                                                                                                                                                                                                                                                                                                                                                                                                                                                                                                                                                                                                                                                                                                                                                                                                                                                                                                                                                                                                                                                                                                                                                                                                                                                                                                                                                                                                                                                                                                                                                                                                                                                                                                                                                                                                                                                                                                                                                                                                                                                                                                                                                                                                                                                                                                                                                                                                                                                                                                                                                                                                                                                                                                                                                                                                                                                                                                                                                                                                                                                                                                                                                                                                    | Q03169;HOYLC0;- Q03169                       | Tumor necrosis fa | TNFAIP2 |
| 22.8201 | NaN     |  | 22.133  | NaN |         | NaN                                                                                                                                                                                                                                                                                                                                                                                                                                                                                                                                                                                                                                                                                                                                                                                                                                                                                                                                                                                                                                                                                                                                                                                                                                                                                                                                                                                                                                                                                                                                                                                                                                                                                                                                                                                                                                                                                                                                                                                                                                                                                                                                                                                                                                                                                                                                                                                                                                                                                                                                                                                                                                                                                                                                                                                                                                                                                                                                                                                                                                                                                                                                                                                                                                                                                                                                                                                                                                                                                                                                                                                                                                                                                                                                                                                                                                                                                                                                                                                                                                                                                                                                                                                                                                                                                                                                                                                                                                                                                                                                                                                                                                                                                                                                                                                                                                                                                                                                                                                                                                                                                                                                                                                                                                                                                                                                                                                                                                                                                                                                                                                                                                                                                                                                                                                                                                                                                                                                                                                                                                        | NaN                                          | NaN               | NaN     |
| 22.1435 | NaN     |  | NaN     | NaN |         | NaN                                                                                                                                                                                                                                                                                                                                                                                                                                                                                                                                                                                                                                                                                                                                                                                                                                                                                                                                                                                                                                                                                                                                                                                                                                                                                                                                                                                                                                                                                                                                                                                                                                                                                                                                                                                                                                                                                                                                                                                                                                                                                                                                                                                                                                                                                                                                                                                                                                                                                                                                                                                                                                                                                                                                                                                                                                                                                                                                                                                                                                                                                                                                                                                                                                                                                                                                                                                                                                                                                                                                                                                                                                                                                                                                                                                                                                                                                                                                                                                                                                                                                                                                                                                                                                                                                                                                                                                                                                                                                                                                                                                                                                                                                                                                                                                                                                                                                                                                                                                                                                                                                                                                                                                                                                                                                                                                                                                                                                                                                                                                                                                                                                                                                                                                                                                                                                                                                                                                                                                                                                        | NaN                                          | NaN               | NaN     |
| 25.8642 | 25.3167 |  | 26.0672 |     | 25.6325 | 25.2443 | 25.9235 | 24.868  | NaN     | 24.7864 | 25.5172 | 25.3096 | 25.0539 | O00220;F8U8C0 O00220;F8U8C0                                                                                                                                                                                                                                                                                                                                                                                                                                                                                                                                                                                                                                                                                                                                                                                                                                                                                                                                                                                                                                                                                                                                                                                                                                                                                                                                                                                                                                                                                                                                                                                                                                                                                                                                                                                                                                                                                                                                                                                                                                                                                                                                                                                                                                                                                                                                                                                                                                                                                                                                                                                                                                                                                                                                                                                                                                                                                                                                                                                                                                                                                                                                                                                                                                                                                                                                                                                                                                                                                                                                                                                                                                                                                                                                                                                                                                                                                                                                                                                                                                                                                                                                                                                                                                                                                                                                                                                                                                                                                                                                                                                                                                                                                                                                                                                                                                                                                                                                                                                                                                                                                                                                                                                                                                                                                                                                                                                                                                                                                                                                                                                                                                                                                                                                                                                                                                                                                                                                                                                                                | Tumor necrosis fa                            | TNFRSF10A         |         |
| 26.2898 | 26.5714 |  | 26.8002 |     | 26.0116 | 26.073  | 26.856  | 26.1625 | NaN     | 25.5008 | 26.4976 | 26.2973 | 26.6494 | O14763;O14763-2 O14763;O14763-2                                                                                                                                                                                                                                                                                                                                                                                                                                                                                                                                                                                                                                                                                                                                                                                                                                                                                                                                                                                                                                                                                                                                                                                                                                                                                                                                                                                                                                                                                                                                                                                                                                                                                                                                                                                                                                                                                                                                                                                                                                                                                                                                                                                                                                                                                                                                                                                                                                                                                                                                                                                                                                                                                                                                                                                                                                                                                                                                                                                                                                                                                                                                                                                                                                                                                                                                                                                                                                                                                                                                                                                                                                                                                                                                                                                                                                                                                                                                                                                                                                                                                                                                                                                                                                                                                                                                                                                                                                                                                                                                                                                                                                                                                                                                                                                                                                                                                                                                                                                                                                                                                                                                                                                                                                                                                                                                                                                                                                                                                                                                                                                                                                                                                                                                                                                                                                                                                                                                                                                                            | Tumor necrosis fa                            | TNFRSF10B         |         |
| 25.8429 | 25.2235 |  | 24.8147 |     | 24.8533 | 24.5557 | NaN                                                                                                                                                                                                                                                                                                                                                                                                                                                                                                                                                                                                                                                                                                                                                                                                                                                                                                                                                                                                                                                                                                                                                                                                                                                                                                                                                                                                                                                                                                                                                                                                                                                                                                                                                                                                                                                                                                                                                                                                                                                                                                                                                                                                                                                                                                                                                                                                                                                                                                                                                                                                                                                                                                                                                                                                                                                                                                                                                                                                                                                                                                                                                                                                                                                                                                                                                                                                                                                                                                                                                                                                                                                                                                                                                                                                                                                                                                                                                                                                                                                                                                                                                                                                                                                                                                                                                                                                                                                                                                                                                                                                                                                                                                                                                                                                                                                                                                                                                                                                                                                                                                                                                                                                                                                                                                                                                                                                                                                                                                                                                                                                                                                                                                                                                                                                                                                                                                                                                                                                                                        | NaN                                          | NaN               | NaN     |
| NaN     | NaN     |  | NaN     | NaN |         | NaN     | NaN     | 21.1311 | NaN     | NaN     | NaN     | NaN     | NaN     | NaN                                                                                                                                                                                                                                                                                                                                                                                                                                                                                                                                                                                                                                                                                                                                                                                                                                                                                                                                                                                                                                                                                                                                                                                                                                                                                                                                                                                                                                                                                                                                                                                                                                                                                                                                                                                                                                                                                                                                                                                                                                                                                                                                                                                                                                                                                                                                                                                                                                                                                                                                                                                                                                                                                                                                                                                                                                                                                                                                                                                                                                                                                                                                                                                                                                                                                                                                                                                                                                                                                                                                                                                                                                                                                                                                                                                                                                                                                                                                                                                                                                                                                                                                                                                                                                                                                                                                                                                                                                                                                                                                                                                                                                                                                                                                                                                                                                                                                                                                                                                                                                                                                                                                                                                                                                                                                                                                                                                                                                                                                                                                                                                                                                                                                                                                                                                                                                                                                                                                                                                                                                        | NaN                                          | NaN               | NaN     |
| 29.6734 | 29.2578 |  | 29.9636 |     | 28.387  | 27.8102 | 28.6977 | 28.9293 | 28.8912 | 28.2611 | 27.5339 | 26.9007 | 27.4884 | Q15025;Q15025-2 Q15025;Q15025-2                                                                                                                                                                                                                                                                                                                                                                                                                                                                                                                                                                                                                                                                                                                                                                                                                                                                                                                                                                                                                                                                                                                                                                                                                                                                                                                                                                                                                                                                                                                                                                                                                                                                                                                                                                                                                                                                                                                                                                                                                                                                                                                                                                                                                                                                                                                                                                                                                                                                                                                                                                                                                                                                                                                                                                                                                                                                                                                                                                                                                                                                                                                                                                                                                                                                                                                                                                                                                                                                                                                                                                                                                                                                                                                                                                                                                                                                                                                                                                                                                                                                                                                                                                                                                                                                                                                                                                                                                                                                                                                                                                                                                                                                                                                                                                                                                                                                                                                                                                                                                                                                                                                                                                                                                                                                                                                                                                                                                                                                                                                                                                                                                                                                                                                                                                                                                                                                                                                                                                                                            | TNFAIP3-interact                             | TNIP1             |         |
| 24.6462 | 25.6396 |  | 25.437  |     | 24.2952 | 25.208  | 25.4197 | 25.51   | 25.0134 | 25.3794 | 24.9516 | 25.1656 | 25.8234 | Q9COC2;Q9COC2-2 Q9COC2;Q9COC2-2                                                                                                                                                                                                                                                                                                                                                                                                                                                                                                                                                                                                                                                                                                                                                                                                                                                                                                                                                                                                                                                                                                                                                                                                                                                                                                                                                                                                                                                                                                                                                                                                                                                                                                                                                                                                                                                                                                                                                                                                                                                                                                                                                                                                                                                                                                                                                                                                                                                                                                                                                                                                                                                                                                                                                                                                                                                                                                                                                                                                                                                                                                                                                                                                                                                                                                                                                                                                                                                                                                                                                                                                                                                                                                                                                                                                                                                                                                                                                                                                                                                                                                                                                                                                                                                                                                                                                                                                                                                                                                                                                                                                                                                                                                                                                                                                                                                                                                                                                                                                                                                                                                                                                                                                                                                                                                                                                                                                                                                                                                                                                                                                                                                                                                                                                                                                                                                                                                                                                                                                            | 182 kDa tankyras                             | TNKS1BP1          |         |
| 28.8555 | 27.8713 |  | 28.4793 |     | 28.972  | 28.1549 | 28.5488 | 28.1261 | 28.1674 | 28.5285 | 28.4757 | 28.6097 | 28.1439 | Q92973;Q92973-2 Q92973;Q92973-2                                                                                                                                                                                                                                                                                                                                                                                                                                                                                                                                                                                                                                                                                                                                                                                                                                                                                                                                                                                                                                                                                                                                                                                                                                                                                                                                                                                                                                                                                                                                                                                                                                                                                                                                                                                                                                                                                                                                                                                                                                                                                                                                                                                                                                                                                                                                                                                                                                                                                                                                                                                                                                                                                                                                                                                                                                                                                                                                                                                                                                                                                                                                                                                                                                                                                                                                                                                                                                                                                                                                                                                                                                                                                                                                                                                                                                                                                                                                                                                                                                                                                                                                                                                                                                                                                                                                                                                                                                                                                                                                                                                                                                                                                                                                                                                                                                                                                                                                                                                                                                                                                                                                                                                                                                                                                                                                                                                                                                                                                                                                                                                                                                                                                                                                                                                                                                                                                                                                                                                                            | Transportin-1                                | TNPO1             |         |
| 24.7523 | 23.1168 |  | 23.6383 |     | 25.2226 | 23.4317 | 23.8678 | NaN     | NaN     | NaN     | 24.3317 | NaN     | 22.8422 | O14787-2;O14787 O14787-2;O14787                                                                                                                                                                                                                                                                                                                                                                                                                                                                                                                                                                                                                                                                                                                                                                                                                                                                                                                                                                                                                                                                                                                                                                                                                                                                                                                                                                                                                                                                                                                                                                                                                                                                                                                                                                                                                                                                                                                                                                                                                                                                                                                                                                                                                                                                                                                                                                                                                                                                                                                                                                                                                                                                                                                                                                                                                                                                                                                                                                                                                                                                                                                                                                                                                                                                                                                                                                                                                                                                                                                                                                                                                                                                                                                                                                                                                                                                                                                                                                                                                                                                                                                                                                                                                                                                                                                                                                                                                                                                                                                                                                                                                                                                                                                                                                                                                                                                                                                                                                                                                                                                                                                                                                                                                                                                                                                                                                                                                                                                                                                                                                                                                                                                                                                                                                                                                                                                                                                                                                                                            | Transportin-2                                | TNPO2             |         |
| 23.655  | 23.534  |  | 23.8985 |     | 23.8534 | 23.8985 | 23.8091 | 23.5362 | 23.8912 | NaN     | 24.2352 | 24.1263 | 24.1111 | Q9Y5L0;C9J7E5; Q9Y5L0;C9J7E |                                              |                   |         |



|         |         |         |         |         |         |         |         |         |         |         |         |                                  |                                     |                                    |
|---------|---------|---------|---------|---------|---------|---------|---------|---------|---------|---------|---------|----------------------------------|-------------------------------------|------------------------------------|
| 29.9653 | 30.6149 | 30.5637 | 30.1695 | 30.4204 | 30.5386 | 30.552  | 30.7038 | 29.9513 | 30.7963 | 30.8395 | 30.5916 | P67936;K7EP68;K P67936           | Tropomyosin alpha TPM4              |                                    |
| 24.6836 | NaN     | 25.1525 | NaN     | NaN     | 24.9871 | 25.9036 | 25.1007 | NaN     | NaN     | NaN     | NaN     | P67936-2;K7ENT6 P67936-2;K7ENT6  | Tropomyosin alpha TPM4              |                                    |
| 26.0351 | 26.9333 | 26.3756 | 25.5926 | 25.8656 | 26.0594 | 27.3481 | 26.8621 | 26.218  | 25.4256 | 24.9981 | 25.5907 | Q14773;A0A0C4D Q14773;A0A0C4D    | Tripeptidyl-peptid TPP1             |                                    |
| 28.0637 | 28.6368 | 28.0047 | 28.02   | 28.4417 | 27.855  | 28.4715 | 28.9801 | 28.4235 | 28.3413 | 28.2054 | 28.1248 | P29144;Q5VZU9 P29144;Q5VZU9      | Tripeptidyl-peptid TPP2             |                                    |
| 27.8134 | 27.437  | 27.9456 | 28.3223 | 28.2341 | 28.1558 | 25.7136 | 26.6326 | 25.7346 | 28.1023 | 28.206  | 27.8491 | P12270;P12270-2 P12270           | Nucleoprotein TPI TPR               |                                    |
| 24.3868 | NaN     | 23.012  | 23.0725 | NaN     | NaN     | 24.8557 | NaN     | NaN     | 23.8843 | 23.0756 | NaN     | Q5T0D9;Q5T0D9- Q5T0D9;Q5T0D9-    | Tumor protein p6 TPRG1L             |                                    |
| 23.208  | 22.9527 | 22.7131 | 22.8152 | 22.9739 | 23.0519 | 22.9783 | NaN     | NaN     | 23.0211 | 23.0866 | 23.5232 | Q9Y3C4;Q9Y3C4- Q9Y3C4;Q9Y3C4-    | EKC/KEOPS complex TPRKB             |                                    |
| 22.0351 | 22.4696 | 22.5454 | 22.193  | 22.5061 | 23.5082 | NaN     | NaN     | NaN     | NaN     | NaN     | NaN     | Q4KMQ1;H3BLU1 Q4KMQ1             | Taperin TPRN                        |                                    |
| NaN     | NaN     | 22.2195 | NaN     | NaN     | NaN     | 22.9321 | NaN     | NaN     | NaN     | NaN     | NaN     | O60507;C9J3I4 O60507             | Protein-tyrosine s TPST1            |                                    |
| 29.1017 | 30.0528 | 29.609  | 28.9212 | 29.82   | 29.5972 | 30.3939 | 30.3117 | 30.023  | 29.6331 | 29.631  | 30.1454 | P13693;Q5W0H4; P13693;Q5W0H4;    | Translationally-co TPT1             |                                    |
| NaN     | NaN     | NaN     | NaN     | 22.9898 | NaN     | Q9ULW0;Q9ULW Q9ULW0;Q9ULW        | Targeting protein TPX2              |                                    |
| 27.9771 | 27.3994 | 28.1248 | 28.5112 | 28.0167 | 28.282  | 27.092  | 28.2483 | 26.8489 | 28.7254 | 28.9391 | 28.1835 | Q13595;Q13595- Q13595;Q13595-    | Transformer-2 prc TRA2A             |                                    |
| 28.2234 | 27.4427 | 28.0363 | 28.4717 | 27.4084 | 28.3092 | 27.0416 | 27.4129 | 26.6446 | 28.7189 | 28.5483 | 27.7088 | P62995;P62995-3 P62995;P62995-3; | Transformer-2 prc TRA2B             |                                    |
| NaN     | NaN     | NaN     | 21.8752 | NaN     | Q15628;Q15628- Q15628;Q15628-    | Tumor necrosis fa TRADD             |                                    |
| 22.4071 | NaN     | NaN     | 22.6102 | NaN     | Q12933;Q12933- Q12933;Q12933-    | TNF receptor-assc TRAF2             |                                    |
| 22.1276 | 21.5866 | 21.6747 | 22.1103 | 21.7366 | NaN     | NaN     | NaN     | NaN     | 21.578  | 21.5086 | NaN     | Q9Y4K3 Q9Y4K3                    | TNF receptor-assc TRAF6             |                                    |
| 25.0822 | NaN     | 24.6205 | 24.4348 | 24.4782 | 24.4339 | NaN     | NaN     | NaN     | NaN     | NaN     | NaN     | O14545;F8VNX8 O14545;F8VNX8      | TRAF-type zinc fin TRAFD1           |                                    |
| 22.5121 | NaN     | 22.1978 | 22.3225 | NaN     | NaN     | NaN     | NaN     | NaN     | 22.3114 | 21.9875 | NaN     | Q15629;G3XAN4; Q15629;G3XAN4;    | Translocating chain TRAM1           |                                    |
| 26.4785 | 27.2317 | 26.4329 | 26.5229 | 26.9915 | 26.3532 | 25.9334 | 26.5044 | 27.4105 | 26.3602 | 26.5952 | 26.6424 | Q12931;Q12931- Q12931;Q12931-    | Heat shock protein TRAP1            |                                    |
| 23.4238 | 23.3404 | 23.5995 | 23.6227 | 23.6941 | 23.6431 | 22.9115 | NaN     | 22.9724 | 22.8344 | 23.5649 | 23.4925 | Q9Y5R8;J3L3S0;J3 Q9Y5R8;J3L3S0   | Trafficking protein TRAPPC1         |                                    |
| 21.3342 | NaN     | 21.4595 | 22.3352 | NaN     | 21.8383 | NaN     | NaN     | NaN     | 21.0068 | NaN     | NaN     | P48553 P48553                    | Trafficking protein TRAPPC10        |                                    |
| 24.4368 | 23.2943 | 24.2896 | 24.5476 | 23.792  | 24.4742 | 24.1847 | NaN     | NaN     | 24.1182 | NaN     | NaN     | Q7Z392;Q7Z392-4 Q7Z392;Q7Z392-4  | Trafficking protein TRAPPC11        |                                    |
| 24.319  | NaN     | NaN     | 24.0487 | NaN     | 24.2095 | NaN     | NaN     | NaN     | NaN     | NaN     | NaN     | Q8WV73;A0A0J9Y Q8WV73;A0A0J9Y    | Trafficking protein TRAPPC12;CGI-87 |                                    |
| NaN     | NaN     | 23.9876 | 23.7853 | 23.5775 | 24.1029 | NaN     | NaN     | NaN     | NaN     | NaN     | 23.9621 | NaN                              | A5PLN9;A5PLN9- A5PLN9;A5PLN9-2      | Trafficking protein TRAPPC13       |
| NaN     | NaN     | NaN     | 21.397  | 21.6466 | NaN                              | P0DI81;P0DI82;PC P0DI81;P0DI82;PC   | Trafficking protein TRAPPC2;TRAPPC |
| NaN     | NaN     | NaN     | 23.005  | 23.421  | NaN     | NaN     | NaN     | NaN     | 23.1896 | 23.1263 | 23.0239 | 23.168                           | Q9UL33;A0A0B4; Q9UL33;A0A0B4;       | Trafficking protein TRAPPC2L       |
| 25.4841 | 25.2889 | 24.8312 | 25.1761 | 25.2859 | 25.2528 | 24.4687 | 24.6    | 24.7608 | 24.4326 | 24.8417 | 25.0258 | O43617;O43617-2 O43617;O43617-2  | Trafficking protein TRAPPC3         |                                    |
| 23.6279 | 22.7806 | 23.2843 | 23.6087 | 22.629  | 23.048  | NaN     | NaN     | NaN     | 22.5731 | 22.344  | NaN     | Q9Y296;G3V1A0; Q9Y296;G3V1A0;    | Trafficking protein TRAPPC4         |                                    |
| 23.7477 | NaN     | 23.1484 | 23.8227 | 22.4623 | 23.2224 | NaN     | NaN     | NaN     | 22.8238 | NaN     | NaN     | Q8IUR0;M0QZQ8 Q8IUR0             | Trafficking protein TRAPPC5         |                                    |
| 23.677  | NaN     | NaN     | 24.0425 | NaN     | Q865Z2;Q865Z2-2 Q865Z2;Q865Z2-2  | Trafficking protein TRAPPC6B        |                                    |
| 23.5666 | 23.3393 | 23.9739 | 24.1702 | 23.8021 | 23.5128 | 23.0222 | NaN     | NaN     | 23.1239 | NaN     | 23.2797 | Q9Y2L5;J3QJQ5;Q Q9Y2L5;J3QJQ5;Q  | Trafficking protein TRAPPC8         |                                    |
| NaN     | NaN     | NaN     | 23.03   | 22.6781 | NaN     | Q96Q05;H0YBR0; Q96Q05;H0YBR0;    | Trafficking protein TRAPPC9         |                                    |
| NaN     | 24.9865 | O14717;B7Z8H2;C O14717;B7Z8H2;C  | tRNA (cytosine)38 TRDMT1            |                                    |
| 21.6678 | 21.426  | NaN     | 21.977  | NaN     | NaN     | NaN     | NaN     | NaN     | NaN     | 21.0814 | NaN     | Q14142;Q14142- Q14142;Q14142-    | Tripartite motif-cc TRIM14          |                                    |
| 24.4443 | 23.7691 | 24.1768 | 24.2027 | 24.2136 | NaN     | NaN     | NaN     | NaN     | 23.6445 | 23.9506 | NaN     | O95361;B3KP96;J O95361;B3KP96;J  | Tripartite motif-cc TRIM16;TRIM16L  |                                    |
| 22.6982 | NaN     | 22.6312 | NaN     | NaN     | 23.2646 | NaN     | NaN     | NaN     | NaN     | NaN     | NaN     | P19474;P19474-2 P19474;P19474-2  | E3 ubiquitin-protein TRIM21         |                                    |
| NaN     | 24.4109 | NaN     | NaN     | NaN     | NaN     | P36406;P36406-3 P36406;P36406-3; | E3 ubiquitin-protein TRIM23         |                                    |
| 22.1788 | NaN     | 21.7919 | 22.3962 | NaN     | NaN     | NaN     | NaN     | NaN     | 22.4213 | 22.2064 | NaN     | O15164;A0A087X O15164;A0A087X    | Transcription inte TRIM24           |                                    |
| 29.3371 | 28.4425 | 28.9089 | 29.4387 | 28.6375 | 28.8592 | 28.0185 | 27.8945 | 27.8651 | 28.8821 | 28.5233 | 27.9942 | Q14258 Q14258                    | E3 ubiquitin/ISG1' TRIM25           |                                    |
| 23.9369 | 22.8827 | 23.2046 | 24.5171 | 23.2458 | 23.6443 | 22.8935 | NaN     | NaN     | 23.3384 | 22.9517 | NaN     | Q12899;A2AE48;P Q12899           | Tripartite motif-cc TRIM26          |                                    |
| 28.3746 | 28.3614 | 28.5129 | 29.0488 | 29.0644 | 28.8416 | 27.514  | 27.4796 | 27.693  | 29.2596 | 29.3891 | 29.0073 | Q13263;Q13263- Q13263;Q13263-2   | Transcription inte TRIM28           |                                    |
| 22.0108 | NaN     | NaN     | 21.7653 | NaN     | NaN     | NaN     | NaN     | NaN     | 21.7796 | NaN     | NaN     | Q13049;Q5JVV0 Q13049             | E3 ubiquitin-protein TRIM32         |                                    |
| 24.2405 | 23.2805 | 23.7542 | 24.6382 | 24.1684 | 24.1301 | NaN     | NaN     | NaN     | 24.2517 | 24.4427 | 24.2828 | Q9UPN9;Q9UPN9 Q9UPN9;Q9UPN9      | E3 ubiquitin-protein TRIM33         |                                    |
| 23.48   | NaN     | 23.908  | 23.7032 | NaN     | NaN     | NaN     | 25.1282 | NaN     | 24.1046 | 24.2207 | NaN     | O00635 O00635                    | E3 ubiquitin-protein TRIM38         |                                    |
| 24.9751 | 24.8826 | 24.9905 | 25.6882 | 25.7179 | 24.7073 | 23.1611 | NaN     | NaN     | 25.1045 | 25.2549 | NaN     | Q9BRZ2;C9J191;Q Q9BRZ2           | E3 ubiquitin-protein TRIM56         |                                    |
| NaN     | 25.1058 | Q5EBN2 Q5EBN2                    | Putative tripartite TRIM61          |                                    |
| 26.3218 | 24.033  | 25.358  | 25.3121 | 23.9927 | 24.8614 | 24.7838 | NaN     | 22.6339 | 25.2758 | 24.4878 | 23.9564 | O75962;O75962-4 O75962;O75962-4  | Triple functional d TRIO            |                                    |
| 24.4269 | 25.2918 | 24.9521 | 24.4042 | 24.9954 | 25.377  | 24.6256 | 25.657  | NaN     | 24.6422 | 24.7049 | NaN     | Q9H2D6;Q9H2D6 Q9H2D6;Q9H2D6      | TRIO and F-actin-I TRIOBP           |                                    |
| 25.3608 | 25.8391 | 25.674  | 25.0161 | 25.5442 | 25.5402 | 26.6591 | 26.321  | 25.829  | 25.8902 | 25.8456 | 26.139  | Q15642;Q15642- Q15642;Q15642-    | Cdc42-interacting TRIP10            |                                    |
| 22.2586 | NaN     | NaN     | 22.0885 | NaN     | Q15643;H0YJ97 Q15643;H0YJ97      | Thyroid receptor-i TRIP11           |                                    |
| 24.4925 | 23.624  | 23.9173 | 24.9142 | 23.5039 | 23.9646 | 23.4502 | 23.8411 | NaN     | 23.9572 | 23.8378 | 22.6654 | Q14669;Q14669- Q14669;Q14669-    | E3 ubiquitin-protein TRIP12         |                                    |
| 26.8755 | 24.8128 | 25.8354 | 27.0092 | 24.7955 | 25.8532 | 24.1077 | 23.303  | 24.7708 | 25.6326 | 25.5103 | 24.6341 | Q15645;H0YAL2;C Q15645           | Pachytene checkpoint TRIP13         |                                    |
| 23.6742 | 23.0485 | 23.0246 | NaN     | 23.467  | NaN     | NaN     | NaN     | NaN     | 22.1396 | 24.7072 | NaN     | Q15654;A0A0D9S Q15654;A0A0D9S    | Thyroid receptor-i TRIP6            |                                    |
| 24.553  | 23.395  | 23.8179 | 24.3158 | 24.3993 | 24.1547 | NaN     | 24.6185 | NaN     | 24.556  | 24.7073 | 24.7842 | Q9NXH9;Q9NXH9 Q9NXH9;Q9NXH9      | tRNA (guanine)26 TRMT1              |                                    |
| 28.1205 | 27.2536 | 26.9668 | 28.828  | 27.3219 | 27.1943 | NaN     | 25.6255 | NaN     | 26.4627 | 26.5228 | 26.9811 | Q7L0Y3;C9JVB6 Q7L0Y3;C9JVB6      | Mitochondrial rib TRMT10C           |                                    |
| 25.2173 | 25.1597 | 24.3938 | 25.0136 | 24.9135 | 24.2362 | 25.8504 | NaN     | NaN     | 25.8516 | 24.8497 | NaN     | Q7Z4G4;Q7Z4G4- Q7Z4G4;Q7Z4G4-    | tRNA (guanine)10 TRMT11             |                                    |
| 26.4282 | 25.9349 | 25.7905 | 25.7608 | 25.8435 | 25.7633 | 25.9186 | 25.1501 | 25.4934 | 25.9414 | 25.8828 | 26.1776 | Q9UI30;F5GX77;C Q9UI30;F5GX77;C  | Multifunctional m TRMT112           |                                    |
| 23.078  | NaN     | NaN     | 23.0371 | NaN     | Q7Z2T5;X6RK96;C Q7Z2T5;X6RK96;C  | TRMT11-like protein TRMT1L          |                                    |
| 25.3005 | 24.7775 | 24.5463 | 25.0275 | 25.0139 | 24.776  | NaN     | NaN     | NaN     | 24.15   | 25.5411 | 26.5773 | 24.7524                          | Q32P41;G3V5X1;C Q32P41              | tRNA (guanine)37 TRMT5             |
| 25.8476 | 24.7894 | 24.8009 | 25.738  | 25.1995 | 25.0334 | 23.6831 | 24.7014 | 24.5035 | 25.3148 | 25.8195 | 25.2683 | Q9UIA5;Q9UIA5- Q9UIA5;Q9UIA5-    | tRNA (adenine)58 TRMT6              |                                    |



|     |         |         |         |         |         |         |         |         |         |         |         |         |                  |                  |                                    |                        |
|-----|---------|---------|---------|---------|---------|---------|---------|---------|---------|---------|---------|---------|------------------|------------------|------------------------------------|------------------------|
|     | 24.2927 | 23.8857 | 23.7124 | 24.9785 | 24.2509 | NaN     | NaN     | NaN     | 23.2651 | 24.4201 | 24.9856 | 23.7882 | Q96FX7;H0Y2Q1    | Q96FX7;H0Y2Q1    | tRNA (adenine[58 TRMT61A           |                        |
|     | 24.3932 | 24.2585 | 23.7288 | 23.7601 | 23.9465 | 23.6321 | NaN     | NaN     | 24.5878 | 24.6367 | 24.9981 | 24.5804 | Q96Q11;Q96Q11-   | Q96Q11;Q96Q11-   | CCA tRNA nucleot TRNT1             |                        |
|     | 26.9516 | 26.2066 | 26.6518 | 26.4214 | 26.3273 | 26.6956 | 26.4101 | 26.4605 | 25.9393 | 26.7007 | 26.6078 | 26.1081 | P10155;P10155-5  | P10155;P10155-5  | 60 kDa SS-A/Ro ri TROVE2           |                        |
|     | 23.6457 | 22.472  | 23.4516 | 23.8096 | 23.5921 | 23.4774 | NaN     | NaN     | NaN     | 23.3581 | 23.0304 | NaN     | Q9Y4A5;F2Z2U4;C  | Q9Y4A5;F2Z2U4;C  | Transformation/tt TRRAP            |                        |
| NaN | NaN     | NaN     | NaN     | 21.1856 | NaN     | Q8WWH5           | Q8WWH5           | Probable tRNA psi TRUB1            |                        |
| NaN | NaN     | NaN     | NaN     | 20.812  | NaN     | P49815;P49815-3  | P49815;P49815-3  | Tuberin TSC2                       |                        |
| NaN | NaN     | NaN     | NaN     | NaN     | NaN     | NaN     | 23.6634 | NaN     | NaN     | NaN     | NaN     | NaN     | Q15714;Q15714-;  | Q15714;Q15714-;  | TSC22 domain fan TSC22D1           |                        |
| NaN | NaN     | NaN     | NaN     | NaN     | NaN     | NaN     | 20.9004 | NaN     | NaN     | NaN     | NaN     | NaN     | Q9Y3Q8;H7BZ77;C  | Q9Y3Q8;H7BZ77;C  | TSC22 domain fan TSC22D4           |                        |
| NaN | NaN     | NaN     | NaN     | 22.2002 | NaN     | Q8WW01;F2Z3M     | Q8WW01;F2Z3M     | tRNA-splicing end TSEN15           |                        |
|     | 24.2888 | 24.087  | 23.7652 | 24.557  | 23.8007 | 23.854  | NaN     | NaN     | NaN     | NaN     | 23.8169 | NaN     | P43897;P43897-2  | P43897;P43897-2  | Elongation factor TSFM             |                        |
|     | 27.107  | 26.6845 | 26.6444 | 26.3655 | 26.2416 | 26.2758 | 26.803  | 26.0947 | 27.0684 | 26.2145 | 25.7126 | 26.2261 | Q99816;F5H442;C  | Q99816;F5H442;C  | Tumor susceptibil TSG101           |                        |
|     | 22.2277 | 22.15   | 22.3439 | NaN     | 22.5534 | 22.651  | 24.1341 | NaN     | NaN     | 23.8752 | NaN     | NaN     | Q8WUA8;E9PLG7    | Q8WUA8           | Tsukushin TSKU                     |                        |
|     | 27.0916 | 27.0362 | 27.2934 | 27.0245 | 27.08   | 27.3261 | 27.3371 | 26.2887 | 26.8563 | 27.3301 | 27.3731 | 27.117  | Q15631;E9PGT1;+  | Q15631;E9PGT1;+  | Translin TSN                       |                        |
|     | 25.7883 | 26.5652 | 26.2411 | 25.5412 | 26.5043 | 25.9763 | 26.0576 | 26.9924 | 26.385  | 26.0714 | 26.4829 | 26.9247 | Q99598;C4P0D6;C  | Q99598;C4P0D6;C  | Translin-associate TSNAX;DISC1     |                        |
|     | 25.449  | 24.832  | 25.3369 | 25.3113 | 24.3876 | 25.1598 | 24.5391 | NaN     | 25.4657 | 25.5414 | 24.6525 | 25.2567 | Q8NG11;H7BXY6;   | Q8NG11;H7BXY6;   | Tetraspanin-14;Te TSPAN14          |                        |
| NaN | NaN     | NaN     | NaN     | NaN     | 22.1474 | NaN     | Q95858;H7C285    | Q95858;H7C285    | Tetraspanin-15 TSPAN15             |                        |
|     | 26.859  | NaN     | 28.4809 | NaN     | NaN     | NaN     | O60637;H0YKJ9;O  | O60637;H0YKJ9;O  | Tetraspanin-3 TSPAN3               |                        |
| NaN |         | 26.5575 | 27.2125 | 26.127  | 26.3254 | 26.9242 | 27.142  | 26.5257 | 27.5572 | 26.2484 | 25.4957 | 26.8289 | E9PSH3;E9PN41;E  | E9PSH3;E9PN41;E  | Tetraspanin;Tetra TSPAN4           |                        |
|     | 23.963  | 24.5787 | 25.1961 | 24.1925 | 24.0739 | NaN     | 23.9279 | NaN     | 24.9397 | 24.8619 | 24.3673 | 24.4647 | B5MD23;O75954    | B5MD23;O75954    | Tetraspanin;Tetra TSPAN9           |                        |
|     | 26.6359 | 25.2089 | 26.0543 | 26.945  | 25.7993 | 26.0044 | 24.7882 | 25.8945 | 24.031  | 25.5572 | 25.5104 | 25.6792 | Q2NL82;J3L1Q5;J  | Q2NL82;J3L1Q5    | Pre-rRNA-process TSR1              |                        |
|     | 22.1845 | NaN     | Q9UJK0           | Q9UJK0           | Ribosome biogen TSR3               |                        |
|     | 25.4122 | 25.2425 | 25.0884 | 25.135  | 25.2712 | 25.0642 | 25.2889 | 25.6169 | 25.1955 | 25.4843 | 25.7143 | 25.3849 | Q53HC9;A8MUM:    | Q53HC9;A8MUM:    | Protein TSSC1 TSSC1                |                        |
|     | 25.8974 | 25.8176 | 26.0008 | 25.507  | 25.8386 | 25.6173 | 24.1229 | 24.966  | NaN     | 25.7481 | 26.0718 | 25.5779 | Q16762;B1AH48    | Q16762           | Thiosulfate sulfur TST             |                        |
|     | 27.4496 | 27.1678 | 27.0533 | 27.0811 | 27.1499 | 27.1253 | 26.3226 | 25.2279 | 26.7579 | 27.2036 | 28.0044 | 26.9691 | Q13630;E9PKL9;E  | Q13630;E9PKL9;E  | GDP-L-fucose synth TSTA3           |                        |
|     | 25.7639 | 26.0059 | 25.2627 | 24.977  | 25.6796 | 25.1771 | NaN     | 26.9114 | 25.6617 | 26.1692 | 25.7574 | NaN     | Q99614;H0YB37    | Q99614           | Tetratricopeptide TTC1             |                        |
|     | 26.0286 | 24.993  | 25.386  | 25.9144 | 24.9228 | 25.3455 | 24.7284 | 25.3069 | 24.928  | 25.6623 | 25.5043 | 25.2504 | Q6P3X3;F8WCH1;   | Q6P3X3           | Tetratricopeptide TTC27            |                        |
|     | 22.7129 | NaN     | Q6PGP7;D6RCE2    | Q6PGP7;D6RCE2    | Tetratricopeptide TTC37            |                        |
| NaN |         | 22.7779 | 22.1267 | NaN     | 22.3539 | NaN     | 22.3038 | NaN     | NaN     | NaN     | 22.7241 | 22.892  | NaN              | NaN              | NaN                                |                        |
|     | 23.8956 | 22.9054 | 23.1403 | 23.3419 | 23.5657 | NaN     | 23.0188 | NaN     | NaN     | NaN     | 23.2172 | NaN     | 23.4666          | Q95801           | Q95801                             | Tetratricopeptide TTC4 |
| NaN | NaN     | NaN     | NaN     | NaN     | 23.7644 | NaN              | NaN              | NaN                                |                        |
|     | 25.1842 | 25.5928 | 26.3466 | 25.591  | 25.8179 | 26.1314 | 25.3425 | 24.512  | 24.9802 | 26.4911 | 25.8916 | 25.2924 | Q86TV6;Q86TV6-;  | Q86TV6;Q86TV6-;  | Tetratricopeptide TTC7B            |                        |
|     | 25.1275 | 26.2093 | 25.5887 | 24.9745 | 25.9895 | 25.8594 | 26.2007 | 26.2859 | 25.9568 | 25.7218 | 26.264  | 26.1318 | Q8N5M4;H0YDR3    | Q8N5M4;H0YDR3    | Tetratricopeptide TTC9C            |                        |
|     | 24.0004 | 23.9782 | 23.7158 | 23.5663 | 23.5605 | 23.697  | 23.0506 | NaN     | 23.681  | 23.3941 | 23.856  | NaN     | Q9UNY4;Q9UNY4    | Q9UNY4           | Transcription term TTF2            |                        |
|     | 25.4108 | 23.6695 | 24.2464 | 25.1304 | 23.9288 | 24.3468 | 23.7241 | NaN     | 23.8256 | 24.2075 | 24.4072 | NaN     | O43156           | O43156           | TELO2-interacting TT1              |                        |
|     | 25.346  | NaN     | 23.9554 | 25.0014 | 23.4735 | 23.5721 | NaN     | NaN     | NaN     | 24.4392 | 23.8294 | NaN     | Q6NXR4;E5RIH5    | Q6NXR4;E5RIH5    | TELO2-interacting TT2              |                        |
|     | 23.564  | 23.4772 | 23.6764 | 23.8011 | 23.3926 | 23.9048 | NaN     | NaN     | NaN     | 23.2161 | NaN     | NaN     | P33981;P33981-2  | P33981;P33981-2  | Dual specificity pr TTK            |                        |
|     | 27.4193 | 25.96   | 26.3139 | 26.7174 | 26.0576 | 26.3161 | 26.5282 | 26.6337 | 26.7278 | 27.0584 | 27.0073 | 27.0197 | Q14166;V9GY16    | Q14166           | Tubulin-tyrosine TLL12             |                        |
| NaN | NaN     | NaN     | NaN     | 25.0489 | NaN              | NaN              | NaN                                |                        |
|     | 24.8259 | 25.0565 | 24.8978 | 24.1555 | 24.7268 | 24.9449 | 24.8957 | NaN     | 25.999  | 24.912  | NaN     | 25.3628 | Q9C0H2;Q9C0H2-   | Q9C0H2;Q9C0H2-   | Protein tweety ho TTYH3            |                        |
|     | 27.1072 | 25.665  | 24.3292 | 27.5382 | 24.6397 | NaN              | NaN              | NaN                                |                        |
|     | 34.8198 | 33.9449 | 34.4603 | 34.7201 | 34.0661 | 34.4421 | 34.3414 | 34.3853 | 34.1993 | 34.8649 | 34.7605 | 33.6689 | P68363;P68363-2  | P68363;P68363-2  | Tubulin alpha-1B ( TUBA1B          |                        |
|     | 27.405  | 25.8811 | 23.902  | 27.1303 | 25.5005 | 23.7824 | NaN              | NaN              | NaN                                |                        |
|     | 27.5325 | 27.0041 | 27.1642 | 27.4726 | 27.1331 | 27.2369 | 27.0778 | 27.0196 | 26.644  | 27.5062 | 26.985  | 26.2067 | P68366;P68366-2  | P68366;P68366-2  | Tubulin alpha-4A ( TUBA4A          |                        |
|     | 32.8028 | 32.1311 | 32.7137 | 32.7638 | 32.4057 | 32.7414 | 32.0003 | 32.4912 | 32.0948 | 32.6515 | 32.7001 | 31.9371 | P07437;Q5JP53;Q  | P07437;Q5JP53;Q  | Tubulin beta chain TUBB            |                        |
|     | 27.1878 | 27.5648 | 27.8792 | 28.111  | 27.7615 | 28.0368 | 27.7907 | 27.9456 | 28.1421 | 28.7715 | 28.3836 | 27.336  | Q13885;Q9BVA1    | Q13885;Q9BVA1    | Tubulin beta-2A cI TUBB2A;TUBB2B   |                        |
| NaN | NaN     | NaN     | NaN     | 19.6848 | NaN     | G3V542           | G3V542           | TUBB3                              |                        |
|     | 27.6404 | 27.7247 | 28.0276 | 28.0365 | 28.1828 | 28.072  | 28.8682 | 29.0887 | 29.2889 | 29.3977 | 29.6822 | 28.404  | Q13509;A0A0B4J;  | Q13509;A0A0B4J;  | Tubulin beta-3 ch: TUBB3           |                        |
|     | 34.3421 | 33.6267 | 34.1025 | 34.4083 | 33.8139 | 34.0955 | 33.8596 | 33.9913 | 33.8316 | 34.6348 | 34.5693 | 33.5693 | P68371;M0R2D3;I  | P68371           | Tubulin beta-4B cI TUBB4B          |                        |
|     | 31.6475 | 30.5926 | 31.2517 | 31.8882 | 30.94   | 31.3406 | 30.2162 | 30.6299 | 30.6554 | 31.071  | 30.9175 | 30.1745 | Q9BUF5;K7ESM5;   | Q9BUF5;K7ESM5    | Tubulin beta-6 ch: TUBB6           |                        |
|     | 27.5777 | 26.2915 | NaN     | 26.3664 | 24.3813 | NaN     | Q3ZCM7;A0A075E   | Q3ZCM7;A0A075E   | Tubulin beta-8 ch: TUBB8           |                        |
|     | 25.6608 | NaN     | Q9UJT0;S4R3K3    | Q9UJT0;S4R3K3    | Tubulin epsilon ch TUBE1           |                        |
|     | 27.9533 | 27.1821 | 27.5489 | 27.8207 | 27.5447 | 27.7239 | 26.7502 | 27.7419 | 27.4145 | 27.4122 | 27.6722 | 27.3989 | P23258;Q9NRH3;I  | P23258;Q9NRH3    | Tubulin gamma-1 TUBG1;TUBG2        |                        |
|     | 26.3269 | 25.0039 | 25.5539 | 26.1516 | 24.9136 | 25.5165 | 25.2275 | 23.8618 | 25.2142 | 26.0028 | 25.6358 | 24.9544 | Q9BSJ2;Q9BSJ2-4; | Q9BSJ2;Q9BSJ2-4; | Gamma-tubulin cI TUBGCP2           |                        |
|     | 25.5157 | 24.2253 | 24.7607 | 25.5097 | 24.4043 | 24.8291 | 23.854  | 24.6613 | 24.256  | 25.1208 | 24.1755 | 23.1682 | Q96CW5;Q96CW;    | Q96CW5;Q96CW;    | Gamma-tubulin cI TUBGCP3           |                        |
|     | 23.6983 | NaN     | 22.6517 | 23.125  | 22.5152 | NaN     | 22.7377 | NaN     | NaN     | 22.7729 | 22.4526 | NaN     | Q9UGJ1;Q9UGJ1-   | Q9UGJ1;Q9UGJ1-   | Gamma-tubulin cI TUBGCP4           |                        |
|     | 21.2199 | NaN     | Q96RT7;E7EQL8;C  | Q96RT7;E7EQL8;C  | Gamma-tubulin cI TUBGCP6           |                        |
|     | 30.5503 | 29.9684 | 29.6878 | 30.5905 | 30.0718 | 30.0589 | 28.5262 | 29.1064 | 29.6176 | 29.5959 | 29.5588 | 29.2997 | P49411;H3BNU3    | P49411           | Elongation factor TUFM             |                        |
| NaN | NaN     | NaN     | 22.4166 | 22.7208 | NaN     | NaN     | NaN     | NaN     | 25.0015 | NaN     | NaN     | 22.4803 | NaN              | NaN              | NaN                                |                        |
|     | 23.2568 | NaN     | 22.7969 | 22.7563 | 23.058  | 22.8422 | NaN     | 23.3748 | NaN     | NaN     | NaN     | 23.4209 | Q9NYZ1;C9JY55;J  | Q9NYZ1;C9JY55;J  | Golgi apparatus r TVP23B;TVP23C;TV |                        |
|     | 25.8438 | 26.4486 | 26.0878 | 25.4747 | 26.1833 | 25.9834 | 26.5227 | 26.3105 | 27.2816 | 26.3373 | 26.0918 | 26.6862 | Q12792;Q12792-;  | Q12792;Q12792-;  | Twinfilin-1 TWF1                   |                        |



|         |         |         |         |         |         |         |         |         |         |         |                                   |                                             |                                 |                                 |                          |
|---------|---------|---------|---------|---------|---------|---------|---------|---------|---------|---------|-----------------------------------|---------------------------------------------|---------------------------------|---------------------------------|--------------------------|
| 26.1529 | 27.6347 | 27.0512 | 26.6751 | 27.2862 | 27.12   | 27.7843 | 27.6751 | 27.3724 | 27.3995 | 27.2431 | 27.7788                           | Q6IBS0;D6RG15;+ Q6IBS0;D6RG15;+ Twinfilin-2 | TWF2                            |                                 |                          |
| NaN     | NaN     | NaN     | NaN     | NaN     | NaN     | 26.1328 | 25.9411 | 25.7337 | NaN     | NaN     | NaN                               | Q9GZX9;J3QS03 Q9GZX9;J3QS03                 | Twisted gastrulat TWSG1         |                                 |                          |
| 27.6403 | 27.6012 | 27.6014 | 27.6441 | 27.3448 | 27.5173 | 27.1012 | 28.1213 | 27.2707 | 27.2391 | 27.5324 | 27.0416                           | P40222;Q8N3L3 P40222                        | Alpha-taxilin TXLNA             |                                 |                          |
| 25.7468 | 25.9625 | 25.7252 | 25.9296 | 25.9036 | 25.3327 | 25.9247 | 26.2603 | NaN     | 25.508  | 25.714  | 25.7081                           | Q9NUQ3;Q9NUQ: Q9NUQ3;Q9NUQ: Gamma-taxilin   | TXLNG                           |                                 |                          |
| 29.0865 | 28.4397 | 28.5159 | 29.0886 | 28.2344 | 28.4371 | 28.2222 | 26.9509 | 26.8827 | 27.9425 | 27.5848 | 27.2591                           | P10599;P10599-2 P10599;P10599-2             | Thioredoxin TXN                 |                                 |                          |
| 24.696  | 26.2657 | 25.7442 | 25.3703 | 26.2846 | 26.0191 | 26.0263 | 26.7788 | 26.5979 | 25.5378 | 25.8871 | 26.3233                           | O95881;V9GY50;\ O95881                      | Thioredoxin doma TXNDC12        |                                 |                          |
| 22.6237 | 22.7953 | 22.35   | 21.8945 | 22.019  | NaN     | 23.7966 | NaN     | 23.8299 | 21.7064 | NaN     | NaN                               | Q96J42;H0Y997;Q Q96J42;H0Y997;Q             | Thioredoxin doma TXNDC15        |                                 |                          |
| 25.4702 | 26.7934 | 26.3717 | 25.5909 | 26.49   | 26.262  | 26.5308 | 26.5644 | 27.0203 | 25.7819 | 26.5416 | 27.0298                           | Q9BRA2;I3LOK2;I3 Q9BRA2;I3LOK2;I3           | Thioredoxin doma TXNDC17        |                                 |                          |
| 27.8297 | 28.9179 | 28.4045 | 28.1518 | 28.7465 | 28.3482 | 28.211  | 29.8992 | 29.4928 | 28.5982 | 28.7229 | 28.5799                           | Q8NB59;Q8NB59- Q8NB59;Q8NB59-               | Thioredoxin doma TXNDC5         |                                 |                          |
| 24.4322 | 24.0067 | 24.178  | 23.7556 | 23.5924 | 23.948  | 23.7263 | 24.0422 | NaN     | 24.4252 | 23.9822 | 23.9752                           | O14530;O14530-2 O14530;O14530-2             | Thioredoxin doma TXNDC9         |                                 |                          |
| 25.8122 | 24.8122 | 25.6269 | 24.9481 | 23.9635 | 24.5908 | 24.2544 | 23.0678 | NaN     | 24.3771 | NaN     | NaN                               | Q9H3M7;Q9H3M Q9H3M7;Q9H3M                   | Thioredoxin-inter: TXNIP        |                                 |                          |
| 25.538  | 25.9496 | 25.6695 | 25.5058 | 25.7559 | 25.6706 | 25.1842 | 25.5633 | 25.6954 | 25.853  | 25.9651 | 25.9491                           | O43396;K7ER96;K O43396;K7ER96               | Thioredoxin-like p TXNL1        |                                 |                          |
| 27.955  | 28.9919 | 28.292  | 27.869  | 28.8784 | 28.2702 | 27.9988 | 27.8714 | 28.5658 | 28.1457 | 28.0635 | 28.8045                           | Q16881;Q16881-: Q16881;Q16881-:             | Thioredoxin reduc TXNRD1        |                                 |                          |
| 23.3237 | 23.7957 | 24.9583 | 23.3164 | 24.0321 | 25.145  | 23.0198 | NaN     | NaN     | 24.5486 | 24.5221 | NaN                               | P29597;E9PM19;F P29597;E9PM19;E             | Non-receptor tyrk TYK2          |                                 |                          |
| 27.624  | 26.9548 | 27.6945 | 27.2556 | 27.1258 | 27.3697 | 27.2482 | 27.6834 | 27.2316 | 27.9504 | 27.9087 | 27.7801                           | P04818;P04818-2, P04818;P04818-2            | Thymidylate syntt TYMS          |                                 |                          |
| NaN     | 20.5357 | NaN     | NaN                               | Q2T9J0;Q2T9J0-2 Q2T9J0;Q2T9J0-2             | Peroxisomal leade TYSND1        |                                 |                          |
| 27.8046 | 26.0257 | 26.2162 | 28.3423 | 26.1325 | 26.3409 | NaN     | NaN     | 24.0526 | 26.6425 | 26.0963 | NaN                               | Q10I81;P0DN76;C Q10I81;P0DN76;C             | Splicing factor U2, U2AF1       |                                 |                          |
| 25.8399 | 24.9127 | 24.4689 | 25.4539 | 25.6852 | 25.1575 | 25.6211 | 26.5483 | NaN     | 24.7196 | 25.9705 | 26.7203                           | P26368;P26368-2, P26368;P26368-2            | Splicing factor U2, U2AF2       |                                 |                          |
| 26.0604 | 25.5165 | 25.9167 | 26.3969 | 25.8134 | 26.345  | NaN     | NaN     | 23.8001 | 25.3351 | 25.084  | 24.9894                           | O15042;O15042-2 O15042;O15042-2             | U2 snRNP-associia U2SURP        |                                 |                          |
| 25.8721 | 25.5542 | 25.3811 | 25.7117 | 25.4013 | 25.4601 | 25.5964 | 25.7826 | 25.6307 | 25.4285 | 25.5718 | 25.7594                           | Q9BZF9;H0YNH8;C Q9BZF9;H0YNH8;C             | Uveal autoantigen UACA          |                                 |                          |
| 27.9378 | 28.0616 | 27.6371 | 27.7629 | 27.8582 | 27.7214 | 28.0167 | 27.7394 | 27.6115 | 28.1516 | 28.1818 | 28.2729                           | Q16222;Q16222-2 Q16222;Q16222-2             | UDP-N-acetylhexc UAP1           |                                 |                          |
| 24.4558 | 23.6282 | 23.5109 | 23.8471 | 23.3831 | NaN     | 24.0804 | NaN     | 23.3477 | 25.5167 | 25.5121 | NaN                               | Q3KQV9;Q3KQV9 Q3KQV9;Q3KQV9                 | UDP-N-acetylhexc UAP1L1         |                                 |                          |
| 29.8382 | 29.7168 | 29.5652 | 29.5138 | 29.7559 | 29.6532 | 29.7953 | 29.7834 | 30.0977 | 29.7794 | 29.9227 | 30.1075                           | P22314-2;P22314, P22314-2;P22314            | Ubiquitin-like moc UBA1         |                                 |                          |
| 26.9787 | 26.1764 | 26.9915 | 27.2596 | 27.0045 | 27.0681 | 25.7997 | 25.5951 | 24.5191 | 27.1351 | 27.0469 | 26.6292                           | Q9UBT2;Q9UBT2- Q9UBT2;Q9UBT2-               | SUMO-activating UBA2            |                                 |                          |
| 24.5818 | 24.7521 | 24.4226 | 24.6494 | 24.9107 | 24.7946 | 25.1413 | 24.2615 | 24.8906 | 25.523  | 25.6421 | 25.9413                           | Q8TBC4;Q8TBC4-: Q8TBC4;Q8TBC4-:             | NEDD8-activating UBA3           |                                 |                          |
| 24.5101 | 24.358  | 24.4289 | 24.3421 | 24.5901 | 24.1479 | 24.6376 | 24.1334 | 24.6036 | 24.4834 | 24.7322 | 24.6976                           | Q9GZ29;E7EWE1;C Q9GZ29;E7EWE1;C             | Ubiquitin-like moc UBA5         |                                 |                          |
| 28.6623 | 27.5646 | 27.9742 | 28.5049 | 27.9163 | 28.0464 | 27.4992 | 27.5971 | 27.4731 | 28.1388 | 27.8777 | 27.5506                           | AOAVT1;AOAVT1-: AOAVT1;AOAVT1-              | Ubiquitin-like moc UBA6         |                                 |                          |
| 21.9595 | NaN                               | P41226                                      | P41226                          | Ubiquitin-like moc UBA7         |                          |
| 20.8063 | NaN                               | Q9BSL1                                      | Q9BSL1                          | Ubiquitin-associat UBAC1        |                          |
| 22.5559 | 22.768  | 22.5702 | 22.0201 | 22.6849 | 22.5464 | NaN     | NaN     | NaN     | NaN     | 20.9075 | 21.0065                           | NaN                                         | NaN                             | Q5TF62;F5H2U4;C Q5TF62;F5H2U4;C | Ubiquitin-associat UBAP2 |
| 26.2916 | 26.9898 | 26.2908 | 25.9591 | 26.4746 | 25.9682 | 25.6372 | 26.6655 | 25.4126 | 25.2681 | 25.8371 | 25.3081                           | Q14157;Q14157-5 Q14157;Q14157-5             | Ubiquitin-associat UBAP2L       |                                 |                          |
| 26.481  | 25.3178 | 25.6399 | 25.7669 | 24.6538 | 25.5443 | 25.4632 | 25.0095 | 23.8139 | 24.2738 | 24.5024 | 23.6201                           | Q8TF42                                      | Q8TF42                          | Ubiquitin-associat UBASH3B      |                          |
| 25.3495 | 25.5998 | 25.4515 | 24.6453 | 24.7918 | 24.7319 | 25.6435 | 25.8202 | 25.538  | 24.8154 | 24.7702 | 25.088                            | O00762;O00762-2 O00762;O00762-2             | Ubiquitin-conjuga UBE2C         |                                 |                          |
| NaN                               | 22.5676                                     | P62837                          | P62837                          | Ubiquitin-conjuga UBE2D2 |
| 26.0649 | 26.028  | 26.2476 | 25.6756 | 26.0351 | 26.1638 | 26.1485 | NaN     | 26.4892 | 26.449  | 26.5976 | 25.8388                           | P61077;P61077-3 P61077;P61077-3             | Ubiquitin-conjuga UBE2D3        |                                 |                          |
| 22.069  | 22.5294 | 22.2538 | NaN     | NaN     | NaN     | 22.2819 | NaN     | NaN     | 22.2162 | NaN     | NaN                               | P62253;I3LOQ0;I3 P62253;I3LOQ0;I3           | Ubiquitin-conjuga UBE2G1        |                                 |                          |
| 24.6556 | 25.1657 | 24.802  | 24.4359 | 25.1234 | 24.6482 | 24.9009 | NaN     | 24.3746 | 24.9773 | 24.7425 | NaN                               | P60604;P60604-2 P60604;P60604-2             | Ubiquitin-conjuga UBE2G2        |                                 |                          |
| NaN     | NaN     | NaN     | 21.3049 | NaN                               | P62256;H7C4M9;C P62256;H7C4M9;C             | Ubiquitin-conjuga UBE2H         |                                 |                          |
| 25.2502 | 26.5101 | 25.9108 | 25.6288 | 26.6565 | 26.1196 | 25.5585 | 26.5068 | 26.172  | 26.6301 | 26.6802 | 26.63279;H3BQQ9;C P63279;H3BQQ9;C | SUMO-conjugation UBE2I                      |                                 |                                 |                          |
| 25.9109 | 25.8751 | 25.9187 | 25.2656 | 25.6221 | 25.6369 | 25.7268 | 25.2942 | 25.6213 | 26.3414 | 25.9673 | 25.5582                           | P61086;D6RDM7;C P61086;D6RDM7;C             | Ubiquitin-conjuga UBE2K         |                                 |                          |
| 24.957  | 26.5581 | 26.0008 | 25.2156 | 26.1584 | 25.6678 | 26.4248 | 25.0819 | 26.0121 | 25.864  | 25.7102 | 25.9142                           | P68036;P68036-2 P68036;P68036-2             | Ubiquitin-conjuga UBE2L3        |                                 |                          |
| NaN     | 22.733  | NaN                               | I14933;E9PQT7;C I14933;E9PQT7;C             | Ubiquitin;/ISG15-c UBE2L6       |                                 |                          |
| 26.3531 | 27.1672 | 27.0565 | 26.6479 | 27.0346 | 27.2933 | 26.9135 | 25.2083 | 27.4193 | 27.3325 | 27.5261 | 27.7138                           | P61081;MOQX69;C P61081                      | NEDD8-conjugatir UBE2M          |                                 |                          |
| 28.4959 | 28.3063 | 28.5033 | 28.0479 | 28.1088 | 28.5884 | 28.6537 | 27.3075 | 28.0865 | 29.083  | 28.7221 | 28.7516                           | P61088;F8VQQ8;F P61088;F8VQQ8;F             | Ubiquitin-conjuga UBE2N         |                                 |                          |
| 25.9246 | 24.9046 | 25.5875 | 25.9126 | 25.1406 | 25.2689 | 25.0997 | 25.5617 | 25.7662 | 25.1455 | 25.3877 | 25.8208                           | Q9COC9;K7ES11;K Q9COC9;K7ES11               | E2/E3 hybrid ubiq UBE2O         |                                 |                          |
| 22.5422 | 22.1996 | 22.5837 | 22.9551 | 22.57   | 22.2739 | 22.2756 | NaN     | NaN     | NaN     | 22.2198 | 22.3004                           | Q7Z7E8;Q7Z7E8-2 Q7Z7E8                      | Ubiquitin-conjuga UBE2Q1        |                                 |                          |
| 25.4252 | 25.4195 | 25.9732 | 25.8679 | 26.1104 | 26.0808 | 24.8495 | 25.1302 | 25.3866 | 26.0244 | 26.6232 | 26.6009                           | Q16763;K7EPJ1;K Q16763;K7EPJ1               | Ubiquitin-conjuga UBE25         |                                 |                          |
| 23.3313 | 23.0472 | 23.3762 | 22.7889 | NaN     | 23.2982 | NaN     | NaN     | NaN     | 23.7686 | 23.8066 | 23.2623                           | Q9NPD8                                      | Q9NPD8                          | Ubiquitin-conjuga UBE2T         |                          |
| 26.9767 | 26.6828 | 26.6328 | 26.7455 | 26.5237 | 26.6024 | 26.8606 | 27.0546 | 26.0583 | 27.1923 | 26.6749 | 27.221                            | Q13404;I3LOAO;Q Q13404;I3LOAO;Q             | Ubiquitin-conjuga UBE2V1;TMEM18 |                                 |                          |
| 27.6778 | 28.0417 | 27.8995 | 27.4439 | 27.6108 | 27.9679 | 27.7854 | 26.8982 | 27.2535 | 27.8401 | 28.039  | 27.8851                           | Q15819;G3V113;C Q15819;G3V113;C             | Ubiquitin-conjuga UBE2V2        |                                 |                          |
| 24.5219 | 25.5873 | 25.2456 | 24.7093 | 25.0907 | 25.2551 | 25.23   | NaN     | NaN     | 25.2575 | 25.8399 | 25.1916                           | Q9H832;Q9H832- Q9H832;Q9H832-               | Ubiquitin-conjuga UBE2Z         |                                 |                          |
| 24.5318 | 23.5277 | 24.0945 | 24.2855 | 23.4722 | 23.9544 | 23.6871 | 24.3762 | NaN     | 24.6762 | 24.3305 | NaN                               | Q05086;Q05086-: Q05086;Q05086-2             | Ubiquitin-protein UBE3A         |                                 |                          |
| 26.8742 | 25.6909 | 26.2349 | 26.7715 | 26.0809 | 25.9436 | 25.0842 | 25.7453 | 25.3591 | 26.1866 | 26.2134 | 24.1613                           | Q15386;Q15386-: Q15386                      | Ubiquitin-protein UBE3C         |                                 |                          |
| 23.7056 | 22.7375 | 23.6484 | 24.2492 | 23.1494 | 22.695  | NaN     | NaN     | NaN     | 23.4022 | 23.242  | NaN                               | Q14139;Q14139-: Q14139;Q14139-2             | Ubiquitin conjuga UBE4A         |                                 |                          |
| 23.0948 | NaN     | 22.171  | 22.6537 | 22.6328 | 22.5772 | NaN     | NaN     | NaN     | NaN     | NaN     | NaN                               | O95155;O95155-: O95155;O95155-3             | Ubiquitin conjuga UBE4B         |                                 |                          |
| 22.9965 | NaN     | NaN     | 23.2154 | NaN     | 22.8298                           | Q9YS29;Q9YS29-2 Q9YS29;Q9YS29-2             | UbiA prenyltransf UBIAD1        |                                 |                          |
| 22.8338 | 23.5722 | 23.4185 | 22.4896 | 23.2996 | 23.0048 | NaN     | NaN     | NaN     | NaN     | NaN     | 22.9236                           | P11441;Q5HY81 P11441;Q5HY81                 | Ubiquitin-like prot UBL4A       |                                 |                          |
| 23.4917 | 23.2509 | 23.1428 | 23.6641 | 22.9614 | 23.0277 | NaN     | NaN     | NaN     | NaN     | NaN     | 22.8263                           | Q8WVV7                                      | Q8WVV7                          | Ubiquitin-like don UBLCP1       |                          |
| 21.8241 | NaN     | 21.419  | 21.9408 | NaN     | NaN     | NaN     | NaN     | 21.9335 | NaN     | NaN     | NaN                               | Q9NZI7;Q9NZI7-4 Q9NZI7;Q9NZI7-4             | Upstream-binding UBFP1          |                                 |                          |
| 27.1927 | 27.2539 | 27.2418 | 26.4686 | 26.8521 | 26.7839 | 26.833  | 27.1353 | 26.1035 | 26.799  | 26.8188 | 26.7637                           | Q9UMX0;Q9UMX Q9UMX0                         | Ubiquilin-1 UBLQN1              |                                 |                          |



|     |         |         |     |         |         |         |         |         |         |         |         |         |         |         |                  |                  |                    |                    |      |
|-----|---------|---------|-----|---------|---------|---------|---------|---------|---------|---------|---------|---------|---------|---------|------------------|------------------|--------------------|--------------------|------|
| NaN | NaN     | NaN     | NaN | NaN     | NaN     | 21.9991 | NaN     | Q9UMX0-2         | Q9UMX0-2         | Ubiquilin-1        | UBQLN1             |      |
|     | 23.3363 | 22.4738 |     | 23.4221 | NaN     | Q9UHD9           | Q9UHD9           | Ubiquilin-2        | UBQLN2             |      |
|     | 21.4297 | NaN     |     |         | NaN     | Q9NRR5;HOYD50    | Q9NRR5;HOYD50    | Ubiquilin-4        | UBQLN4;UBQLN1      |      |
|     | 22.7369 | NaN     |     | 22.1725 | 22.2582 | 21.7723 | NaN     | NaN     | NaN     | NaN     | NaN     | 22.5313 | NaN     | NaN     | Q8IWW7;A0A087V   | Q8IWW7;A0A087V   | E3 ubiquitin-prote | UBR1               |      |
|     | 23.2883 | 22.6058 |     | 22.8684 | 23.3683 | NaN     |         | 22.9818 | NaN     | NaN     | NaN     | 23.216  | NaN     | NaN     | Q8IWW8;Q8IWW8    | Q8IWW8;Q8IWW8    | E3 ubiquitin-prote | UBR2               |      |
|     | 29.6054 | 28.6617 |     | 29.1759 | 29.6048 | 29.0357 |         | 29.2666 | 28.8942 | 29.1194 |         | 29.04   | 29.1862 | 28.9928 | 28.8728          | Q5T457;Q5T457-3  | Q5T457;Q5T457-3    | E3 ubiquitin-prote | UBR4 |
|     | 23.3265 | 23.8468 |     | 23.7695 | 24.2136 | 23.6642 | 23.4301 | NaN     |         | NaN     | NaN     | 23.6404 | 24.1058 | 23.4854 | O95071;E7EMW7    | O95071;E7EMW7    | E3 ubiquitin-prote | UBR5               |      |
| NaN |         | NaN     |     | NaN     |         | 22.3825 | NaN     | NaN     | NaN     | NaN     | NaN     | NaN     |         | NaN     | Q8N806;E9PCJ7;H  | Q8N806;E9PCJ7;H  | Putative E3 ubiq   | UBR7               |      |
|     | 25.8797 | 26.0268 |     | 26.2207 | 25.6489 | 25.9232 |         | 26.395  | 25.7727 | NaN     |         | 25.527  | 27.0167 | 26.405  | 25.9462          | Q9HAC8           | Ubiquitin domain-  | UBTD1              |      |
|     | 23.6374 | 23.9309 |     | 24.3667 | 23.8362 | NaN     |         | 24.3788 | NaN     | NaN     | NaN     | 24.227  | 23.8275 | NaN     | Q8WUN7           | Q8WUN7           | Ubiquitin domain-  | UBTD2              |      |
| NaN |         | NaN     |     | 21.9686 | 22.3922 |         | NaN     | NaN     | NaN     | NaN     | NaN     | NaN     |         | NaN     | 22.9077          | P17480;P17480-2  | P17480;P17480-2    | Nucleolar transcr  | UBTF |
|     | 25.6229 | 26.3568 |     | 26.1137 | 25.275  | 26.9688 |         | 25.801  | 25.9313 | 26.1339 | 26.1815 | 24.9513 | 26.0766 | 26.6428 | Q04323;E9PJ81;E  | Q04323;E9PJ81;E  | UBX domain-cont    | UBXN1              |      |
|     | 22.6831 | NaN     |     | 22.0474 | 22.4542 | NaN     |         | NaN     | NaN     | NaN     | NaN     | NaN     |         | NaN     | Q92575;F8WB86;   | Q92575           | UBX domain-cont    | UBXN4              |      |
|     | 22.6489 | 23.0921 |     | 22.901  | NaN     |         | 22.5817 | NaN     | NaN     | NaN     | NaN     | 22.9192 | NaN     | NaN     | O94888;F8WB69;   | O94888;F8WB69;   | UBX domain-cont    | UBXN7              |      |
|     | 28.1782 | 28.4471 |     | 28.197  | 27.7081 | 27.9703 |         | 28.0205 | 28.5152 | 27.7    | 27.7638 | 28.4513 | 27.9194 | 28.2245 | P15374;A0A087W   | P15374;A0A087W   | Ubiquitin carboxy  | UCHL3              |      |
|     | 25.0998 | 24.9473 |     | 24.6474 | 24.8068 | 24.2354 | 24.5005 | 24.6016 | NaN     |         | 23.8345 | 24.5847 | 24.3272 | 24.6377 | Q5LIA5;Q9Y5K5-2  | Q5LIA5;Q9Y5K5-2  | Ubiquitin carboxy  | UCHL5              |      |
|     | 25.9409 | 25.3546 |     | 25.3357 | 25.9015 | 25.4793 | 25.2415 | 24.8339 | 25.3466 |         | 25.0882 | 25.375  | 25.7142 | 25.754  | Q9BZX2;Q9BZX2-   | Q9BZX2           | Uridine-cytidine k | UCK2               |      |
|     | 24.9962 | NaN     |     | 23.5645 | 24.5301 | 23.1986 | 23.4681 | NaN     | NaN     | NaN     |         | 23.6505 | 24.0966 | NaN     | Q9NWZ5;Q9NWZ     | Q9NWZ5;Q9NWZ     | Uridine-cytidine k | UCKL1              |      |
|     | 25.2965 | 24.5747 |     | 25.2123 | 24.5671 | 24.1611 | 25.0182 | 26.1095 | NaN     |         | 24.2445 | 24.6795 | NaN     | NaN     | Q8IX04;Q8IX04-6; | Q8IX04;Q8IX04-6; | Ubiquitin-conjuga  | UEVLD              |      |
|     | 24.1571 | 24.3594 |     | 24.2906 | 23.6159 | 24.2489 | 24.3879 | 23.989  | NaN     | NaN     |         | 23.8785 | 23.8134 | NaN     | Q9Y3C8           | Q9Y3C8           | Ubiquitin-fold mo  | UFC1               |      |
|     | 24.6956 | 24.8399 |     | 24.6747 | 24.1991 | 23.9245 | 23.9846 | 24.3093 | 25.1079 | 24.1248 |         | 23.5121 | 24.1089 | 24.2313 | Q92890;Q92890-1  | Q92890;Q92890-1  | Ubiquitin fusion d | UFD1L              |      |
|     | 26.3051 | 25.7396 |     | 26.1215 | 26.3405 | 26.0187 | 26.0077 | 25.6958 | 25.4762 |         | 25.842  | 26.0258 | 25.9506 | 25.679  | O94874;O94874-3  | O94874;O94874-3  | E3 UFM1-protein    | UFL1               |      |
|     | 22.9824 | 24.9733 |     | 24.1376 | 23.4229 | 23.2078 | 24.0027 | 24.0704 | NaN     | NaN     |         | 23.3884 | 23.4957 | NaN     | P61960;HOY614    | P61960;HOY614    | Ubiquitin-fold mo  | UFL1               |      |
|     | 23.735  | 23.2468 |     | 23.1483 | NaN     | Q9NUQ7;HOYA18    | Q9NUQ7;HOYA18    | Ufm1-specific pro  | UFSP2              |      |
|     | 25.1295 | 25.038  |     | 25.0164 | 24.6623 | 24.314  | 24.2546 | NaN     | NaN     |         | 25.0777 | 24.4192 | NaN     |         | 24.7782          | Q16739           | Ceramide glucosy   | UGCG               |      |
|     | 28.3475 | 27.9512 |     | 27.6761 | 28.009  | 28.1941 | 27.6387 | 27.1762 | 27.2504 | 27.6989 |         | 27.8608 | 28.0935 | 27.9055 | O60701;O60701-2  | O60701;O60701-2  | UDP-glucose 6-de   | UGDH               |      |
|     | 26.4358 | 26.7905 |     | 26.7414 | 26.4851 | 26.8559 | 26.7782 | 26.0888 | 26.963  | 27.2535 |         | 25.7435 | 25.9585 | 26.4998 | Q9NYU2;Q9NYU2    | Q9NYU2;Q9NYU2    | UDP-glucose:glyc   | UGGT1              |      |
|     | 28.2532 | 29.1264 |     | 28.7546 | 28.0624 | 28.929  | 28.6347 | 28.6536 | 28.9653 | 28.8175 |         | 28.6304 | 28.7487 | 28.9666 | Q16851-2;C9JNZ1  | Q16851-2;C9JNZ1  | UTP--glucose-1-ph  | UGP2               |      |
| NaN |         | 22.4062 |     | 22.8949 | 23.3637 | 22.6517 | 22.7397 | 22.3004 | NaN     | NaN     | NaN     | 23.0457 | 23.1763 | 22.9035 | Q96T88;Q96T88-2  | Q96T88;Q96T88-2  | E3 ubiquitin-prote | UHRF1              |      |
|     | 22.9011 | NaN     |     | NaN     | 22.7228 | NaN     | Q6BDS2;H7C1J4    | Q6BDS2;H7C1J4    | UHRF1-binding pr   | UHRF1BP1           |      |
|     | 23.6074 | 24.2568 |     | 23.92   | 23.9226 | 24.3012 | NaN     | NaN     | NaN     | NaN     | NaN     | 25.1301 | 24.77   | NaN     | Q96PU4;B1AL33;   | Q96PU4;B1AL33;   | E3 ubiquitin-prote | UHRF2              |      |
| NaN |         | NaN     |     | NaN     | NaN     | NaN     |         | 24.9213 | NaN     | NaN     | NaN     | 22.9994 | NaN     | NaN     | Q9BZM5;Q6H3X3    | Q9BZM5           | NKG2D ligand 2     | ULBP2              |      |
|     | 23.993  | 23.866  |     | 24.5194 | 24.6454 | 24.3327 | 24.4728 | 25.0749 | NaN     | 24.7317 |         | 25.7953 | 25.3889 | 25.2874 | Q9BZM4;Q9BZM4    | Q9BZM4           | NKG2D ligand 3     | ULBP3              |      |
|     | 28.5462 | 27.6114 |     | 27.8373 | 28.0899 | 27.7735 | 27.8419 | 27.3339 | 27.2747 | 27.3444 |         | 28.2604 | 28.4311 | 27.6144 | P11172;P11172-3  | P11172;P11172-3  | Uridine 5-monoph   | UMPS               |      |
| NaN |         | NaN     |     | 22.3466 | NaN     |         | NaN     | A6NIH7;K7EJU3;K  | A6NIH7;K7EJU3;K  | Protein unc-119 h  | UNC119B;UNC119     |      |
|     | 27.7325 | 27.1451 |     | 27.5319 | 27.4038 | 26.7918 | 27.194  | 27.2332 | 27.2762 | 27.4563 |         | 27.1828 | 26.6744 | 26.7941 | Q70J99;Q70J99-3  | Q70J99;Q70J99-3  | Protein unc-13 ho  | UNC13D             |      |
|     | 28.0419 | 27.3733 |     | 27.5915 | 27.8471 | 27.5001 | 27.6668 | 27.5741 | 27.6158 | 27.3572 |         | 27.6483 | 27.5966 | 27.5428 | Q9H3U1-2;Q9H3L   | Q9H3U1-2;Q9H3L   | Protein unc-45 ho  | UNC45A             |      |
|     | 29.634  | 28.7382 |     | 29.1716 | 29.5698 | 28.9728 | 29.263  | 28.9563 | 29.3329 | 28.9265 |         | 29.5093 | 29.4898 | 29.1635 | Q92900-2;Q9290C  | Q92900-2;Q9290C  | Regulator of nons  | UPF1               |      |
|     | 24.0283 | 22.9013 |     | 23.383  | 23.8037 | 22.9742 | 23.3073 | 23.2428 | NaN     | NaN     |         | 23.2523 | NaN     | NaN     | Q9HAU5;Q9HAU5    | Q9HAU5           | Regulator of nons  | UPF2               |      |
|     | 24.4287 | 23.8161 |     | 23.6516 | 24.0723 | 24.5865 | NaN     | NaN     | NaN     | NaN     | 23.6381 | 24.2259 | 24.0748 | NaN     | Q16831;F8WD51;   | Q16831;F8WD51;   | Uridine phosphon   | UPP1               |      |
|     | 24.2678 | NaN     |     | 22.4283 | 22.6867 | 22.3456 | NaN     | Q96BW1;E9PSD7;   | Q96BW1;E9PSD7;   | Uracil phosphorib  | UPRT               |      |
|     | 23.6685 | 23.6662 |     | 24.0547 | 24.1974 | 23.849  | 23.654  | NaN     | NaN     | NaN     | NaN     | 23.3574 | 23.4433 | NaN     | Q9BRT2;Q5TAQ0;   | Q9BRT2;Q5TAQ0;   | Ubiquinol-cytochr  | UQCC2              |      |
|     | 23.8089 | 25.6605 |     | 25.0925 | 24.8472 | 25.8279 | 25.3444 | 23.8897 | 26.2428 |         | 26.816  | 23.3585 | 24.5978 | 25.4307 | P14927;B7Z2R2;P  | P14927;B7Z2R2;P  | Cytochrome b-c1    | UQCRB              |      |
|     | 25.9621 | 26.8241 |     | 26.466  | 26.4482 | 26.867  | 26.4734 | 25.6705 | 27.4062 |         | 28.5401 | 25.421  | 25.9502 | 26.9038 | P31930           | P31930           | Cytochrome b-c1    | UQCR1              |      |
|     | 26.3048 | 27.5322 |     | 26.9115 | 27.1421 | 27.9977 | 27.165  | 25.9071 | 27.7657 |         | 28.6546 | 23.5342 | 26.5722 | 27.3724 | P22695;H3BRG4;   | P22695;H3BRG4;   | Cytochrome b-c1    | UQCR2              |      |
|     | 24.6298 | 25.653  |     | 24.9055 | 24.8679 | 26.0751 | 25.0609 | 23.8313 | 25.8025 | 26.9204 | NaN     |         | 25.0499 | 25.4097 | P47985;P0C7P4    | P47985;P0C7P4    | Cytochrome b-c1    | UQCRFS1;UQCRFS     |      |
|     | 24.5532 | 24.8121 |     | 24.6998 | 25.0088 | 24.6649 | 25.17   | 24.2376 | NaN     | NaN     | NaN     | NaN     | NaN     | NaN     | O14949           | O14949           | Cytochrome b-c1    | UQCRQ              |      |
|     | 21.1264 | NaN     |     | 20.9433 | 21.7762 | NaN     | O60287           | O60287           | Nucleolar pre-rib  | URB1               |      |
|     | 22.4599 | NaN     |     | NaN     | 22.6728 | NaN     | NaN     | NaN     | NaN     | NaN     | NaN     | 21.2756 | NaN     | NaN     | Q14146;Q5VYD0    | Q14146           | Unhealthy ribosor  | URB2               |      |
|     | 23.0251 | 21.5091 |     | 21.8914 | 22.9404 | 21.6552 | 22.0886 | NaN     | NaN     | NaN     | NaN     | 21.7677 | NaN     | NaN     | Q8TCY9;Q8TCY9-2  | Q8TCY9;Q8TCY9-2  | Up-regulator of c  | URGCP              |      |
|     | 25.6818 | 26.4398 |     | 26.0055 | 25.5539 | 26.378  | 26.0541 | 26.3136 | 26.2347 |         | 26.5073 | 26.251  | 26.2509 | 26.8654 | P06132;HOY5R6;C  | P06132;HOY5R6    | Uroporphyrinog     | UROD               |      |
| NaN |         | NaN     |     | NaN     | 22.1599 | NaN     | Q15853;Q15853-3  | Q15853;Q15853-3  | Upstream stimula   | USF2               |      |
|     | 24.225  | 24.7197 |     | 24.8765 | 24.7954 | 24.9396 | 24.7072 | NaN     | NaN     |         | 25.6636 | 23.3872 | 24.0489 | NaN     | Q96IX5           | Q96IX5           | Up-regulated duri  | USMG5              |      |
|     | 27.5592 | 26.9808 |     | 27.2539 | 27.2179 | 26.9298 | 27.2412 | 27.1667 | 27.0628 | 26.8371 | 26.7351 | 26.7593 | 26.9155 | 26.9155 | O60763;O60763-2  | O60763;O60763-2  | General vesicular  | USO1               |      |
|     | 26.2057 | 25.2777 |     | 25.6273 | 25.9725 | 25.5936 | 25.4902 | 25.5843 | 25.6286 | 25.9906 |         | 26.3962 | 26.8368 | 26.3149 | Q14694;Q14694-3  | Q14694;Q14694-3  | Ubiquitin carboxy  | USP10              |      |
|     | 23.1666 | 22.5715 |     | 23.1871 | 23.4082 | 22.5029 | 22.5201 | NaN     | NaN     | NaN     | NaN     | 22.0886 | NaN     | NaN     | P51784;G5E9A6;C  | P51784;G5E9A6    | Ubiquitin carboxy  | USP11              |      |
|     | 24.9518 | 23.8436 |     | 24.33   | 24.4929 | 23.9427 | 24.2375 | 23.8079 | NaN     | NaN     |         | 23.4961 | 24.2304 | NaN     | Q92995;Q92995-3  | Q92995;Q92995-3  | Ubiquitin carboxy  | USP13              |      |
|     | 28.2216 | 27.9027 |     | 28.3716 | 27.9406 | 28.0488 | 28.4221 | 28.0396 | 28.3273 | 28.2562 |         | 28.2762 | 28.4619 | 28.4426 | P54578;P54578-2  | P54578;P54578-2  | Ubiquitin carboxy  | USP14              |      |
|     | 25.1696 | 24.7487 |     | 25.2779 | 25.3209 | 24.9659 | 25.0319 | 25.1517 | 25.7776 | 25.5212 |         | 24.729  | 25.0678 | 25.7823 | Q9Y4E8;Q9Y4E8-2  | Q9Y4E8;Q9Y4E8-2  | Ubiquitin carboxy  | USP15              |      |
|     | 23.7426 |         |     |         |         |         |         |         |         |         |         |         |         |         |                  |                  |                    |                    |      |



|         |         |         |         |         |         |         |         |         |         |         |         |                                                              |                                                                 |  |  |
|---------|---------|---------|---------|---------|---------|---------|---------|---------|---------|---------|---------|--------------------------------------------------------------|-----------------------------------------------------------------|--|--|
| 24.6902 | 22.6292 | 23.6831 | 24.2543 | 23.5763 | 23.4964 | NaN     | NaN     | NaN     | 24.0415 | 24.3959 | NaN     | O94966-7;O94966-7;O94966-7;O94966-7 Ubiquitin carboxy USP19  |                                                                 |  |  |
| 23.0426 | 22.4737 | 23.2826 | 23.2246 | 22.9969 | NaN     | NaN     | NaN     | NaN     | 23.4571 | 23.3935 | 22.871  | Q9UPT9;Q9UPT9- Q9UPT9;Q9UPT9- Ubiquitin carboxy USP22        |                                                                 |  |  |
| 24.5085 | 23.5898 | 23.942  | 24.5662 | 24.0173 | 24.0439 | NaN     | 24.7117 | 24.1784 | 24.3932 | 24.11   | 23.4481 | Q9UPU5;A0A0U1 Q9UPU5 Ubiquitin carboxy USP24                 |                                                                 |  |  |
| 22.5914 | NaN     | NaN     | 22.2054 | NaN     | Q9UHP3;Q9UHP3 Q9UHP3;Q9UHP3 Ubiquitin carboxy USP25          |                                                                 |  |  |
| 21.1397 | NaN     | Q9Y6I4;HOYL87;H Q9Y6I4;HOYL87;H Ubiquitin carboxy USP3       |                                                                 |  |  |
| 23.0892 | 22.6918 | 22.5719 | NaN     | Q8NFA0;K7EKZ1;K Q8NFA0;K7EKZ1;K Ubiquitin carboxy USP32      |                                                                 |  |  |
| 22.6749 | NaN     | 22.8551 | NaN                                                          | Q8TEY7;Q8TEY7-3 Q8TEY7;Q8TEY7-3 Ubiquitin carboxy USP33         |  |  |
| 22.2902 | NaN     | NaN     | 22.1239 | NaN                                                          | Q9P275;E9PEW0; Q9P275;E9PEW0; Ubiquitin carboxy USP36           |  |  |
| 25.1206 | NaN     | 23.2704 | 24.8551 | NaN     | 23.102  | NaN     | NaN     | NaN     | 23.3708 | 23.3401 | NaN     | NaN                                                          | Q53G59;B9A018; Q53G59;B9A018; U4/U6.U5 tri-snRt USP39           |  |  |
| 25.8094 | NaN     | 24.834  | 25.928  | 24.5019 | 25.0242 | NaN     | NaN     | NaN     | 25.3931 | 25.6265 | 25.3805 | Q13107;Q13107-1 Q13107;Q13107-2 Ubiquitin carboxy USP4       |                                                                 |  |  |
| 22.4875 | NaN     | 22.0213 | 23.1622 | NaN     | NaN     | NaN     | NaN     | NaN     | 22.1052 | 22.2495 | NaN     | Q9NVE5;Q9NVE5- Q9NVE5;Q9NVE5- Ubiquitin carboxy USP40        |                                                                 |  |  |
| NaN     | NaN     | NaN     | 22.3411 | NaN                                                          | H7BZK6;P62068-2 H7BZK6;P62068-2 Ubiquitin carboxy USP46;USP12   |  |  |
| 25.774  | 24.2966 | 24.8993 | 25.2276 | 24.688  | 24.7396 | 23.812  | 24.383  | 23.9522 | 24.5099 | 24.0293 | 23.396  | Q96K76-4;Q96K76-4;Q96K76-4 Ubiquitin carboxy USP47           |                                                                 |  |  |
| NaN     | NaN     | NaN     | 21.4283 | NaN     | NaN     | NaN     | NaN     | NaN     | 21.9922 | NaN     | NaN     | NaN                                                          | Q86UV5;Q86UV5- Q86UV5;Q86UV5- Ubiquitin carboxy USP48           |  |  |
| 28.7997 | 28.7129 | 28.7883 | 28.4861 | 28.646  | 28.5234 | 28.5989 | 28.5952 | 28.386  | 28.636  | 28.5871 | 28.5771 | P45974;P45974-2 P45974;P45974-2 Ubiquitin carboxy USP5       |                                                                 |  |  |
| 21.8096 | 22.4441 | 23.4505 | 23.0075 | 22.7074 | 24.01   | NaN     | 22.4283 | NaN     | 23.8614 | 23.1314 | NaN     | Q92738;X6RAB3;C Q92738;X6RAB3;C USP6 N-terminal-I USP6NL     |                                                                 |  |  |
| 27.0351 | 25.7442 | 26.2937 | 27.1975 | 26.3083 | 26.4511 | 25.7066 | 25.7031 | 24.9353 | 27.0357 | 26.9379 | 26.0145 | Q93009;Q93009- Q93009;Q93009- Ubiquitin carboxy USP7         |                                                                 |  |  |
| NaN     | NaN     | 22.6957 | NaN     | 22.6919 | NaN                                                          | P40818;P40818-2 P40818;P40818-2 Ubiquitin carboxy USP8          |  |  |
| 28.3689 | 26.9652 | 27.5897 | 28.1301 | 27.18   | 27.4676 | 27.1894 | 27.1114 | 27.4629 | 27.5978 | 27.3673 | 27.2079 | Q93008;Q93008-1 Q93008;Q93008-1 Probable ubiquitin USP9X     |                                                                 |  |  |
| NaN     | NaN     | NaN     | 22.3973 | NaN                                                          | Q9BVJ6;Q9BVJ6-2 Q9BVJ6;Q9BVJ6-2 U3 small nucleola UTP14A;UTP14C |  |  |
| 24.4662 | 24.2812 | 24.1628 | 24.9378 | 24.7536 | 24.73   | NaN     | NaN     | NaN     | 24.5594 | 25.2282 | NaN     | NaN                                                          | Q8TED0;Q8TED0- Q8TED0;Q8TED0- U3 small nucleola UTP15           |  |  |
| 25.9065 | 24.1438 | 25.0338 | 25.6256 | 24.7726 | 24.7629 | 23.0854 | NaN     | NaN     | 24.7966 | 25.5106 | 24.1057 | Q9Y5J1;J3KSR7;J3 Q9Y5J1 U3 small nucleola UTP18              |                                                                 |  |  |
| 26.332  | 23.6271 | 24.7711 | 27.5039 | 24.6391 | 24.6706 | 22.8862 | NaN     | NaN     | 24.7483 | 23.542  | 23.0695 | NaN                                                          | O75691 O75691 Small subunit prox UTP20                          |  |  |
| NaN     | 26.5037 | 26.864  | NaN     | 26.5005 | NaN                                                          | Q9BRU9;E5RH13;I Q9BRU9;E5RH13;I rRNA-processing I UTP23         |  |  |
| 22.4277 | NaN     | NaN     | 22.037  | NaN                                                          | Q9NYH9 Q9NYH9 U3 small nucleola UTP6                            |  |  |
| NaN     | 21.5219 | NaN                                                          | HOY337;Q5J144 HOY337 UTRN                                       |  |  |
| 27.9501 | 28.0056 | 28.9774 | 28.3731 | 28.4578 | 29.288  | 28.5219 | 27.6867 | 27.9895 | 29.8981 | 29.4637 | 29.4567 | P46939;P46939-2 P46939;P46939-2 Utrrophin UTRN               |                                                                 |  |  |
| 22.3988 | NaN     | 21.9268 | 22.3395 | NaN     | NaN     | 21.9834 | NaN     | NaN     | 22.0009 | 22.0834 | NaN     | Q9P2Y5;E9PR71;E Q9P2Y5;E9PR71;E UV radiation resis UVRAG     |                                                                 |  |  |
| 25.0972 | 25.0613 | 24.8037 | 24.5607 | 25.2143 | 23.2959 | 27.1043 | 25.9307 | 25.9284 | 26.8679 | 25.9618 | NaN     | Q8NBZ7;Q8NBZ7- Q8NBZ7;Q8NBZ7- UDP-glucuronid ac UXS1         |                                                                 |  |  |
| 26.067  | 25.4401 | 25.7375 | 26.1055 | 25.5919 | 25.6995 | 25.9639 | 26.3375 | 26.0502 | 26.2562 | 26.1128 | 25.5369 | Q08AM6;H3BUU8 Q08AM6 Protein VAC14 ho VAC14                  |                                                                 |  |  |
| 24.1771 | 23.8746 | 23.9176 | 23.7709 | 23.5237 | 23.708  | 23.1616 | 23.8605 | 24.4504 | NaN     | NaN     | NaN     | P63027;J3QRU4;F P63027;J3QRU4;F Vesicle-associat VAMP2       |                                                                 |  |  |
| 28.2824 | 27.8746 | 28.2879 | 28.3937 | 27.6877 | 28.4808 | 27.5303 | 27.418  | 27.8218 | 27.2671 | 27.501  | 27.4384 | Q15836;K7ENK9;K Q15836;K7ENK9;K Vesicle-associat VAMP3;VAMP2 |                                                                 |  |  |
| 24.6189 | 23.7513 | 24.6049 | 24.1377 | 23.3843 | 24.1631 | 24.397  | NaN     | NaN     | 23.4022 | NaN     | NaN     | P51809;P51809-3 P51809;P51809-3 Vesicle-associat VAMP7       |                                                                 |  |  |
| 28.6589 | 28.6204 | 28.8963 | 28.3385 | 28.6125 | 28.9498 | 27.8357 | 26.6922 | 27.4185 | 27.9449 | 27.5076 | 27.828  | Q9BV40;B8ZZT4;C Q9BV40;B8ZZT4 Vesicle-associat VAMP8         |                                                                 |  |  |
| 25.4002 | 25.5357 | 26.4384 | 25.7468 | 25.3396 | 26.7309 | 25.6561 | NaN     | 25.1368 | 26.8374 | 26.1777 | 26.1059 | Q8TAA9;Q8TAA9- Q8TAA9;Q8TAA9- Vang-like protein VANGL1       |                                                                 |  |  |
| 28.7118 | 27.8425 | 28.3227 | 28.165  | 27.2132 | 27.5826 | 28.7057 | 26.899  | 26.4402 | 28.6249 | 27.8312 | 26.8617 | Q9P0L0;Q9P0L0-2 Q9P0L0;Q9P0L0-2 Vesicle-associat VAPA        |                                                                 |  |  |
| 26.2121 | 26.0389 | 25.8342 | 25.872  | 25.5382 | 25.5946 | 25.8539 | 25.2304 | 25.1061 | 24.9929 | 25.3172 | 24.9099 | O95292;E5RK64;C O95292 Vesicle-associat VAPB                 |                                                                 |  |  |
| 31.0456 | 29.7681 | 30.3274 | 30.9578 | 30.4168 | 30.5435 | 29.8102 | 29.7868 | 29.6295 | 30.3825 | 30.6831 | 29.7598 | P26640;P26640-2 P26640 Valine--tRNA ligas VARS               |                                                                 |  |  |
| 28.3541 | 28.802  | 28.7112 | 28.4455 | 28.8408 | 28.7295 | 29.5988 | 29.2657 | 29.5508 | 29.3359 | 29.4122 | 29.4831 | P50552;K7EM16;P P50552 Vasodilator-stimu VASP                |                                                                 |  |  |
| 29.1258 | 28.9782 | 29.1851 | 28.8061 | 28.961  | 29.0455 | 30.0301 | 29.0283 | 29.6473 | 29.5765 | 29.2351 | 29.5331 | Q99536;Q99536- Q99536;Q99536- Synaptic vesicle m VAT1        |                                                                 |  |  |
| 22.0786 | NaN     | 22.6576 | NaN     | NaN     | P52735;P52735-3 P52735;P52735-3 Guanine nucleotid VAV2       |                                                                 |  |  |
| 25.6074 | 26.4921 | 26.0977 | 25.2877 | 26.7661 | 26.2858 | 25.955  | 27.053  | 26.5741 | 25.8099 | 26.5561 | 26.6371 | P61758;B4DWR3 P61758;B4DWR3 Prefoldin subunit VBP1           |                                                                 |  |  |
| 30.3315 | 30.2292 | 30.4762 | 30.3032 | 29.8969 | 30.3126 | 30.9154 | 30.1022 | 30.1019 | 30.7002 | 30.1733 | 30.3724 | P18206;P18206-2 P18206;P18206-2 Vinculin VCL                 |                                                                 |  |  |
| 30.966  | 31.5105 | 31.0933 | 30.6066 | 31.1855 | 31.0264 | 31.4407 | 31.7656 | 31.1989 | 31.2438 | 31.3329 | 31.271  | P55072;C9JUP7;C P55072 Transitional endo VCP                 |                                                                 |  |  |
| 23.2651 | NaN     | 22.8472 | 23.1044 | NaN     | 23.1074 | NaN     | NaN     | NaN     | 23.2194 | 23.103  | NaN     | Q96JH7 Q96JH7 Deubiquitinating I VCP1P1                      |                                                                 |  |  |
| 29.1012 | 29.4547 | 29.0706 | 29.3388 | 29.3098 | 29.3055 | 29.0035 | 29.5047 | 30.3403 | 27.8836 | 28.4436 | 29.3867 | P21796;C9JH87 P21796;C9JH87 Voltage-depender VDAC1           |                                                                 |  |  |
| 28.1583 | 28.5358 | 28.4348 | 28.6351 | 28.8084 | 28.7234 | 28.0097 | 28.9803 | 30.2548 | 27.3744 | 27.6563 | 29.1235 | P45880;P45880-2 P45880;P45880-2 Voltage-depender VDAC2       |                                                                 |  |  |
| 26.2229 | 26.6349 | 26.6259 | 26.7178 | 26.9075 | 26.9493 | 25.7839 | 27.2766 | 28.209  | 25.763  | 26.3    | 27.3644 | Q9Y277;Q9Y277- Q9Y277;Q9Y277- Voltage-depender VDAC3         |                                                                 |  |  |
| 23.5242 | 26.1442 | 23.4812 | 22.684  | 24.2045 | 23.5082 | 29.7673 | 29.785  | NaN     | 26.2125 | 23.9114 | NaN     | HOYB18;P15692-1 HOYB18;P15692-1 Vascular endothel VEGFA      |                                                                 |  |  |
| NaN     | 23.5788 | NaN     | NaN     | NaN     | NaN     | 24.3139 | 25.3354 | NaN     | NaN     | NaN     | NaN     | P49767 P49767 Vascular endothel VEGFC                        |                                                                 |  |  |
| 33.6893 | 34.5651 | 33.8512 | 33.4092 | 34.1737 | 33.5938 | 33.9779 | 34.5618 | 33.6593 | 33.8944 | 33.8266 | 33.6814 | P08670;BOYJC4;B P08670;BOYJC4 Vimentin VIM                   |                                                                 |  |  |
| 23.4461 | 23.3939 | NaN     | NaN     | 23.4347 | NaN     | 23.7785 | NaN     | NaN     | NaN     | NaN     | NaN     | Q9H9C1;G3V4K3;Q Q9H9C1;G3V4K3;Q Spermatogenesis- VIPAS39     |                                                                 |  |  |
| NaN     | 25.8107 | NaN     | O95497 O95497 Pantetheinase VNN1                             |                                                                 |  |  |
| 22.4861 | NaN     | NaN     | 21.777  | NaN     | Q9Y4B6;Q9Y4B6- Q9Y4B6;Q9Y4B6- Protein VPRBP VPRBP            |                                                                 |  |  |
| 26.077  | 25.1832 | 25.8863 | 26.2959 | 26.0712 | 25.6682 | 24.2489 | 24.7733 | 23.1068 | 25.0676 | 25.1297 | 23.2458 | A0A087WXL6;Q9I A0A087WXL6;Q9I Vacuolar protein s VP511       |                                                                 |  |  |
| 23.6823 | NaN     | NaN     | 23.383  | NaN     | Q96RL7;Q96RL7-2 Q96RL7;Q96RL7-2 Vacuolar protein s VP513A    |                                                                 |  |  |
| 23.3983 | 22.8953 | 23.4538 | 22.6282 | 22.9583 | 22.8417 | NaN     | NaN     | NaN     | 22.628  | NaN     | NaN     | Q709C8;Q709C8- Q709C8;Q709C8- Vacuolar protein s VP513C      |                                                                 |  |  |
| 25.1588 | 24.2967 | 24.5605 | 24.8012 | 25.0075 | 24.5638 | 24.2889 | 25.4032 | 24.1951 | 24.2917 | 24.5551 | 24.1857 | Q9H269;Q9H269- Q9H269;Q9H269- Vacuolar protein s VP516       |                                                                 |  |  |
| 25.9338 | 24.0221 | 25.2464 | 25.63   | 24.8835 | 24.8552 | 24.2779 | NaN     | NaN     | 24.7198 | 24.0723 | NaN     | Q9P253;HOYMC9 Q9P253 Vacuolar protein s VP518                |                                                                 |  |  |
| NaN     | 22.5977 | 22.6401 | 22.5267 | 22.1344 | 22.8327 | NaN     | NaN     | NaN     | 22.6327 | 22.9009 | NaN     | Q9BRG1;K7ENE3;Q Q9BRG1;K7ENE3;Q Vacuolar protein-s VP525     |                                                                 |  |  |



|         |         |         |         |         |         |         |         |         |         |         |         |                                                                 |
|---------|---------|---------|---------|---------|---------|---------|---------|---------|---------|---------|---------|-----------------------------------------------------------------|
| 27.2715 | 26.8482 | 26.9024 | 26.7347 | 26.5131 | 26.7016 | 27.8209 | 27.051  | 27.031  | 27.2857 | 26.9682 | 26.7132 | O75436;S4R3Q6;C O75436;S4R3Q6;C Vacuolar protein s VPS26A       |
| 21.8125 | NaN     | 21.9418 | 21.9276 | NaN     | NaN     | 23.1476 | NaN     | NaN     | 21.5633 | NaN     | NaN     | Q4G0F5;H0YCI7 Q4G0F5 Vacuolar protein s VPS26B                  |
| 25.0699 | 25.9597 | 25.6978 | 24.8994 | 25.6388 | 25.5198 | 25.5889 | 26.0726 | 26.6623 | 24.6313 | 24.9394 | 25.306  | Q9UK41;Q9UK41- Q9UK41;Q9UK41- Vacuolar protein s VPS28          |
| 27.0236 | 26.9123 | 26.6757 | 26.3085 | 26.5073 | 26.6375 | 27.8637 | 27.3139 | 27.1847 | 27.2168 | 27.1745 | 26.7904 | Q9UBQ0;F8VXU5; Q9UBQ0;F8VXU5; Vacuolar protein s VPS29          |
| 24.3642 | 24.3617 | 24.2321 | 24.3857 | 24.6246 | 24.0719 | 23.855  | NaN     | 23.952  | 24.067  | 23.748  | 23.6729 | Q96AX1;H3BMM5 Q96AX1;H3BMM5 Vacuolar protein s VPS33A           |
| 26.5812 | 26.0082 | 26.2857 | 26.2119 | 26.1074 | 26.1132 | 25.8958 | 25.6903 | 26.2494 | 26.2315 | 26.1041 | 25.9103 | Q9H267;F5H008;C Q9H267;F5H008;C Vacuolar protein s VPS33B       |
| 28.8075 | 28.1207 | 28.3088 | 28.4174 | 28.0232 | 28.2626 | 28.8222 | 28.7828 | 28.8432 | 28.788  | 28.5308 | 28.4884 | Q96QK1;I3L450;I3 Q96QK1 Vacuolar protein s VPS35                |
| 25.0095 | 25.0121 | 24.7442 | 24.7489 | 25.2249 | 24.8626 | 24.9616 | 25.2713 | 25.4007 | 25.0532 | 25.2953 | 25.2494 | Q86VN1;Q86VN1- Q86VN1; Q86VN1- Vacuolar protein-s VPS36         |
| 24.9388 | 25.4533 | 24.8424 | 24.4637 | 24.9672 | 24.5336 | 25.4536 | 25.281  | 25.3837 | 24.5158 | NaN     | 24.8814 | Q9H9H4;F5H1F6;I Q9H9H4;F5H1F6;I Vacuolar protein s VPS37B       |
| 23.9771 | 24.7572 | 24.5423 | 23.9244 | 24.4005 | 24.1928 | 24.3169 | 24.6833 | NaN     | NaN     | NaN     | 23.9349 | A5D8V6;F5H4Q5 A5D8V6;F5H4Q5 Vacuolar protein s VPS37C           |
| 25.2189 | 25.3805 | 25.2864 | 25.1247 | 25.2952 | 25.2331 | 25.4417 | NaN     | 24.9094 | 24.8114 | 24.7715 | 24.859  | Q9NRW7;A0A087 Q9NRW7;A0A087 Vacuolar protein s VPS45            |
| 26.4893 | 26.9421 | 26.7601 | 26.5833 | 26.5552 | 26.7552 | 27.971  | 27.5447 | 28.7889 | 27.3895 | 27.4943 | 27.8894 | Q9UN37 Q9UN37 Vacuolar protein s VPS4A                          |
| 25.6885 | 25.6559 | 25.6011 | 25.2104 | 25.1781 | 25.6249 | 25.9455 | 25.794  | 26.4821 | 25.3944 | 25.4839 | 25.7804 | O75351;K7EL71;K O75351 Vacuolar protein s VPS4B                 |
| 24.8811 | 24.1885 | 24.6991 | 25.0112 | 24.6439 | 24.8154 | 24.2735 | 24.0667 | 24.3817 | 24.5634 | 24.7196 | NaN     | Q9UID3;Q9UID3- Q9UID3; Q9UID3- Vacuolar protein s VPS51         |
| 26.1914 | 25.2945 | 25.7523 | 25.7768 | 25.371  | 25.7731 | 25.8401 | 23.5949 | 25.1934 | 26.0173 | 25.6572 | 25.337  | Q8N1B4;Q8N1B4- Q8N1B4;Q8N1B4- Vacuolar protein s VPS52          |
| 24.7198 | 23.6243 | 24.2838 | 24.6849 | 24.0538 | 24.4398 | 23.8231 | 24.6608 | NaN     | 23.9485 | 23.8798 | 23.7587 | Q5VIR6-4;Q5VIR6 Q5VIR6-4;Q5VIR6 Vacuolar protein s VPS53        |
| 22.8125 | 22.536  | 22.2004 | 22.8317 | 22.0297 | 22.2435 | NaN     | NaN     | NaN     | NaN     | NaN     | NaN     | Q8N3P4;C9JJN9;C Q8N3P4;C9JJN9;C Vacuolar protein s VPS8         |
| 25.6261 | 24.01   | 24.65   | 25.8254 | 24.0397 | 24.2199 | NaN     | NaN     | NaN     | 24.9727 | 24.8156 | NaN     | Q99986;H0YJ50;H Q99986;H0YJ50 Serine/threonine- VRK1            |
| 27.3618 | 27.355  | 27.3343 | 26.9999 | 26.7882 | 27.2052 | 27.8212 | 26.7553 | 27.8856 | 27.1067 | 26.7376 | 27.6473 | Q9NP79;A0A087V Q9NP79;A0A087V Vacuolar protein s VTA1           |
| 24.6643 | 24.6752 | 25.2454 | 25.3081 | 24.6592 | 25.1721 | 24.921  | 24.8256 | 25.8651 | 24.6771 | 24.6794 | 24.479  | Q96AJ9;Q96AJ9-1 Q96AJ9;Q96AJ9-1 Vesicle transport i VTI1A       |
| 25.0251 | 24.768  | 25.02   | 25.0746 | 24.7532 | 25.2647 | 24.4034 | 24.3514 | 25.5148 | 24.3169 | 24.6595 | 25.3027 | Q9UEU0;Q9UEU0 Q9UEU0;Q9UEU0 Vesicle transport i VTI1B           |
| 22.3493 | 22.3583 | 22.4116 | 22.553  | 22.7475 | 22.4918 | NaN     | NaN     | NaN     | NaN     | NaN     | NaN     | Q96SY0;H3BRY6;E Q96SY0;H3BRY6;E von Willebrand fa VWA9          |
| 25.2201 | NaN     | 24.9001 | 25.3168 | 25.5865 | 25.3579 | NaN     | NaN     | NaN     | 25.4292 | 25.4271 | 25.1352 | Q7Z5K2;Q7Z5K2- Q7Z5K2;Q7Z5K2-2 Wings apart-like e WAPAL         |
| 28.5787 | 28.7101 | 28.2542 | 28.3463 | 28.5273 | 28.1965 | 28.506  | 28.5826 | 28.5615 | 28.21   | 28.1771 | 28.5797 | P23381;P23381-2 P23381;P23381-2 Tryptophan-tRNA WARS            |
| 25.705  | 25.9115 | 25.7646 | 25.1978 | 25.8436 | 25.5551 | 25.3356 | 25.5742 | 25.4737 | 25.6635 | 26.13   | 25.7126 | Q9Y6W5;Q9Y6W5 Q9Y6W5;Q9Y6W5 Wiskott-Aldrich sy WASF2            |
| 25.0726 | NaN     | NaN     | NaN     | 26.8234 | NaN     | A8K0Z3;A0A096Lf A8K0Z3;A0A096Lf WAS protein fami WASH1;WASH3P;A |
| 23.5799 | 23.7874 | 23.5346 | 23.5    | 23.638  | 23.9713 | 23.7817 | 23.5236 | NaN     | 23.3623 | 23.2748 | 24.5423 | O00401 O00401 Neural Wiskott-AI WASL                            |
| 24.2926 | 23.6629 | 23.6201 | 23.5699 | 23.85   | 23.7027 | 23.0606 | NaN     | 23.5643 | 24.1592 | 24.3688 | 24.4442 | Q9Y2W2;F5H5G4; Q9Y2W2;F5H5G4 WW domain-bind WBP11               |
| 23.2928 | 23.6389 | 23.1277 | 22.6413 | NaN     | 22.7456 | NaN     | NaN     | NaN     | NaN     | NaN     | NaN     | Q969T9;A6NG10;I Q969T9;A6NG10;I WW domain-bind WBP2             |
| 23.3814 | 22.8868 | NaN     | 23.1554 | 23.0153 | 23.2289 | NaN     | NaN     | NaN     | 22.9893 | 23.1499 | NaN     | Q96I51;Q96I51-2; Q96I51;Q96I51-2; Williams-Beuren s WBSCR16     |
| 24.1459 | 22.889  | 23.0892 | 23.5252 | 22.4968 | 22.7198 | NaN     | NaN     | NaN     | 23.3504 | 23.2372 | NaN     | Q43709;H7C170;C Q43709;H7C170;C Probable 18S rRN WBSCR22        |
| 25.4204 | 24.839  | 24.9442 | 25.0421 | 24.4818 | 25.2253 | 25.2927 | NaN     | NaN     | 25.5347 | 24.8878 | NaN     | Q8IWB7;C9JJ54 Q8IWB7;C9JJ54 WD repeat and FY WDFY1              |
| 24.9832 | 23.41   | 23.7684 | 24.4162 | 23.931  | 23.5686 | 24.1241 | NaN     | 23.7863 | 23.8618 | 23.4451 | NaN     | Q8IZQ1;Q8IZQ1-2 Q8IZQ1;Q8IZQ1-2 WD repeat and FY WDFY3          |
| 26.2162 | 26.1952 | 26.3613 | 26.5425 | 26.5326 | 26.1782 | 23.7259 | 25.5059 | 24.7882 | 26.1822 | 26.0225 | 26.5019 | O75717;O75717- O75717;O75717-2 WD repeat and HI WDRH1           |
| 30.7505 | 31.3676 | 31.3335 | 30.6551 | 31.3809 | 31.4219 | 31.3546 | 31.2322 | 31.0951 | 31.8079 | 31.7057 | 31.2921 | O75083;D6RD66;C O75083;D6RD66;C WD repeat-contai WDR1           |
| 26.7589 | 26.0141 | 26.2491 | 26.8359 | 26.358  | 26.2312 | 25.7736 | 26.1963 | 26.3819 | 26.2987 | 26.3079 | 25.887  | Q9BZH6;S4R3Z0;S Q9BZH6 WD repeat-contai WDR11                   |
| 25.0328 | 25.3484 | 25.4173 | 25.8474 | 26.1316 | 25.3947 | 24.5975 | 24.1243 | NaN     | 25.9909 | 26.0238 | 25.1087 | Q9GZL7 Q9GZL7 Ribosome biogen WDR12                             |
| 25.021  | 25.0512 | 25.0309 | 25.4486 | 25.5787 | 25.0568 | NaN     | NaN     | NaN     | 24.7788 | 25.3001 | NaN     | Q9BV38;U3KQC1; Q9BV38;U3KQC1; WD repeat-contai WDR18            |
| 25.0654 | 25.4887 | 25.9622 | 25.2322 | 25.7167 | 25.8904 | 25.1704 | 25.0547 | 26.3204 | 26.2329 | 25.7397 | 26.5092 | A0A088AWN2;Q8 A0A088AWN2;Q8 WD repeat-contai WDR20              |
| 24.6718 | 24.8022 | 25.081  | 25.4064 | 25.4554 | 25.0252 | 23.8671 | 24.6221 | 24.9863 | 24.6543 | 24.7464 | 24.9746 | Q9H7D7-2;Q9H7C Q9H7D7-2;Q9H7C WD repeat-contai WDR26            |
| 25.1013 | 24.1206 | 24.6782 | 25.6724 | 24.7251 | 25.2762 | 24.3063 | NaN     | 23.7792 | 24.6338 | 25.7203 | NaN     | Q9UNX4 Q9UNX4 WD repeat-contai WDR3                             |
| 24.9571 | 23.7468 | 23.0964 | 23.9149 | 23.8989 | 23.1416 | 23.508  | NaN     | NaN     | 24.0639 | 23.356  | NaN     | Q9C0J8;Q9C0J8-2 Q9C0J8 pre-mRNA 3 end r WDR33                   |
| 27.1855 | 25.0796 | 25.8274 | 27.2055 | 25.6151 | 26.0457 | 24.0766 | NaN     | 24.6951 | 26.4812 | 26.6664 | 23.4914 | Q8NI36;A0A0A0N Q8NI36;A0A0A0N WD repeat-contai WDR36            |
| 24.4025 | 24.3007 | 24.4707 | 24.1151 | 24.5578 | 24.211  | 24.1227 | NaN     | NaN     | 24.3336 | 24.3634 | NaN     | Q9Y2I8;Q9Y2I8-2; Q9Y2I8;Q9Y2I8-2 WD repeat-contai WDR37         |
| 22.1128 | NaN     | 21.8758 | NaN     | 21.8613 | NaN     | Q9HAD4;H0Y9Z3;I Q9HAD4;H0Y9Z3;I WD repeat-contai WDR41          |
| 24.541  | 24.2957 | 24.4111 | 25.2214 | 24.7441 | 24.546  | 24.5345 | NaN     | NaN     | 24.5187 | 24.7189 | 23.9646 | Q15061;C9IZK7;C Q15061 WD repeat-contai WDR43                   |
| 25.4632 | 25.183  | 25.2472 | 24.8514 | 25.2425 | 25.2941 | 25.2662 | NaN     | 25.2912 | 26.0326 | 25.936  | 25.8764 | Q5JSH3;H7BY83;C Q5JSH3;H7BY83;C WD repeat-contai WDR44          |
| 24.4287 | 23.6523 | 23.9555 | 23.9568 | 23.5841 | 23.7283 | 23.4429 | NaN     | NaN     | 24.1336 | 23.9113 | 23.673  | Q9Y484;C9J471;A Q9Y484;C9J471;A WD repeat domai WDR45           |
| NaN     | NaN     | 23.5833 | NaN     | Q5MNZ6;I3L3A5;I Q5MNZ6 WD repeat domai WDR45B                   |
| 24.6316 | 23.1908 | 23.4767 | 24.7331 | 22.66   | 23.3281 | NaN     | NaN     | NaN     | 23.0639 | 23.4193 | NaN     | O15213;H0Y6G3;A O15213;H0Y6G3;A WD repeat-contai WDR46          |
| 23.8149 | NaN     | NaN     | 23.1842 | 23.3461 | NaN     | NaN     | NaN     | NaN     | 23.5808 | 23.9307 | NaN     | O94967;A0A0A0N O94967;A0A0A0N WD repeat-contai WDR47            |
| 24.9151 | 25.8064 | 25.6036 | 25.3849 | 25.6927 | 25.7949 | 25.5292 | 25.4299 | 25.5264 | 25.9755 | 25.8717 | 25.957  | Q8TAF3;Q8TAF3- Q8TAF3;Q8TAF3-3 WD repeat-contai WDR48           |
| 26.4996 | 26.2726 | 25.6782 | 26.9569 | 26.4768 | 26.2255 | 24.8966 | NaN     | NaN     | 26.1732 | 26.3048 | 25.835  | P61964;V9GZ59;V P61964;V9GZ59 WD repeat-contai WDR5             |
| 22.0689 | NaN     | 22.1402 | 22.2471 | NaN     | Q9H977;C9J016;B Q9H977;C9J016;B WD repeat-contai WDR54          |
| 23.9711 | NaN     | NaN     | 23.5306 | NaN     | NaN     | NaN     | NaN     | NaN     | 23.3834 | 23.7695 | NaN     | Q9H6Y2;G3V1J0;C Q9H6Y2 WD repeat-contai WDR55                   |
| 27.264  | 25.797  | 26.3266 | 26.992  | 25.9206 | 26.1869 | 25.6765 | 25.1315 | 25.9112 | 26.2817 | 26.5233 | 25.9535 | Q9NNW5;E9PDU5 Q9NNW5;E9PDU5 WD repeat-contai WDR6               |
| 25.5039 | 24.1764 | 24.4357 | 24.8249 | 24.6536 | 24.9747 | 23.5504 | 23.5229 | NaN     | 25.7283 | 26.0189 | NaN     | Q9GZS3;H0YN81;I Q9GZS3;H0YN81;I WD repeat-contai WDR61          |
| 23.0676 | 22.4782 | 22.5523 | 22.5112 | NaN     | NaN     | NaN     | NaN     | 22.862  | 22.9993 | 22.5159 | NaN     | O43379-4;O43375 O43379-4;O43375 WD repeat-contai WDR62          |
| 27.3269 | 27.1778 | 26.6029 | 26.9474 | 26.9828 | 26.7261 | 27.2172 | NaN     | NaN     | 27.6242 | NaN     | NaN     | B1ANS9;B1ANS9- B1ANS9;B1ANS9-; WD repeat-contai WDR64           |
| 23.3415 | NaN     | NaN     | 23.5543 | NaN     | NaN     | NaN     | NaN     | NaN     | 23.5321 | 23.7934 | NaN     | Q9NW82;D6RIW8 Q9NW82 WD repeat-contai WDR70                     |



|     |         |         |         |         |         |         |         |         |         |         |         |         |                                                |                                 |                     |                  |       |
|-----|---------|---------|---------|---------|---------|---------|---------|---------|---------|---------|---------|---------|------------------------------------------------|---------------------------------|---------------------|------------------|-------|
|     | 23.4442 | 23.6806 | 23.7195 | 24.169  | 23.9429 | 23.893  | NaN     | NaN     | NaN     | 23.3917 | 24.3229 | 23.3395 | Q6RFH5;Q6RFH5- Q6RFH5;Q6RFH5- WD repeat-contai | WDR74                           |                     |                  |       |
|     | 24.6039 | 23.8512 | 24.7722 | 25.4447 | 25.0308 | 24.7581 | NaN     | NaN     | 24.4583 | 24.4772 | 24.8697 | 24.6969 | Q8IWA0                                         | Q8IWA0 WD repeat-contai         | WDR75               |                  |       |
|     | 27.6933 | 27.4816 | 27.1548 | 27.858  | 27.427  | 27.4262 | 27.3745 | 27.1438 | 26.7148 | 27.2582 | 27.0738 | 26.902  | Q9BQA1;Q9BQA1 Q9BQA1;Q9BQA1                    | Methylosome pro                 | WDR77               |                  |       |
|     | 27.3862 | 25.9162 | 25.9444 | 26.2773 | 25.8642 | 25.8742 | 26.0679 | 24.5121 | 25.7577 | 27.5842 | 27.2359 | 26.2999 | Q6UXN9;C9JBU3                                  | Q6UXN9                          | WD repeat-contai    | WDR82            |       |
| NaN | NaN     | NaN     | NaN     | 22.2814 | NaN     | Q96FK6;G3V4B8                                  | Q96FK6;G3V4B8                   | WD repeat-contai    | WDR89            |       |
|     | 25.0307 | 24.8298 | 24.2725 | 24.2627 | 24.3621 | 24.0863 | 24.4992 | 24.3746 | NaN     | 25.1127 | 25.5183 | 24.6747 | Q96MX6;Q96MX6 Q96MX6;Q96MX6                    | WD repeat-contai                | WDR92;DKFZp434      |                  |       |
|     | 23.7669 | 23.8952 | 23.927  | 23.5109 | 23.935  | 23.9744 | 24.6163 | 23.8178 | 24.3229 | 24.2098 | 23.6699 | 24.2581 | O76024;H0Y9G5                                  | O76024                          | Wolframin           | WFS1             |       |
|     | 22.8651 | 21.6346 | 21.7761 | 21.6784 | NaN     | Q8TF30;Q1A5X7;C                                | Q8TF30                          | WASP homolog-a      | WHAMM            |       |
| NaN |         | 22.9929 | 22.8893 | NaN     | 23.0499 | NaN     | Q9BRP8;Q9BRP8- Q9BRP8;Q9BRP8-                  |                                 | Partner of Y14 anc  | WIBG             |       |
|     | 23.9344 | 24.5398 | 24.6372 | 23.0386 | NaN     | 23.0164 | 23.1106 | 24.3292 | NaN     | NaN     | NaN     | 23.0192 | Q5MZN9;Q5MZN2 Q5MZN9;Q5MZN2                    | WD repeat domai                 | WIPI1               |                  |       |
|     | 24.9751 | 23.9809 | 24.2238 | 23.9051 | 23.9725 | 23.621  | 24.2881 | NaN     | NaN     | NaN     | 24.6671 | 24.8636 | NaN                                            | Q9Y4P8;Q9Y4P8-5 Q9Y4P8;Q9Y4P8-5 | WD repeat domai     | WIPI2            |       |
| NaN | NaN     | NaN     | NaN     | NaN     | NaN     | NaN     | NaN     | NaN     | NaN     | NaN     | NaN     | 20.7737 | Q5T9L3;Q5T9L3-2 Q5T9L3;Q5T9L3-2                | Protein wntless h               | WLS                 |                  |       |
|     | 22.5704 | 22.3572 | 22.8523 | 23.2272 | 22.4268 | NaN     | Q9H4A3;Q9H4A3- Q9H4A3;Q9H4A3-                  | Serine/threonine-               | WNK1                |                  |       |
|     | 22.6913 | NaN     | 22.39   | 22.6411 | 22.4271 | NaN     | NaN     | NaN     | NaN     | 22.9217 | 23.2382 | NaN     | Q9BUR4;E9PMG4 Q9BUR4;E9PMG4                    | Telomerase Cajal                | WRAP53              |                  |       |
|     | 24.728  | 24.3659 | 25.049  | 25.6922 | 25.0009 | 25.2763 | NaN     | NaN     | NaN     | 25.0385 | 25.199  | 25.3386 | Q96555;Q96555-2 Q96555;Q96555-2                | ATPase WRNIP1                   | WRNIP1              |                  |       |
|     | 30.4913 | 30.5676 | 30.6237 | 30.9101 | 31.3585 | 30.562  | NaN     | NaN     | NaN     | NaN     | NaN     | 30.973  | Q15007;Q15007-2 Q15007                         |                                 | Pre-mRNA-splicin    | WTAP             |       |
|     | 23.1156 | 23.5297 | 23.3028 | 23.0256 | NaN     | 23.4227 | NaN     | NaN     | NaN     | 24.4585 | 22.9493 | 23.1085 | 24.0236                                        | O00308;O00308-2 O00308;O00308-2 | NEDD4-like E3 ubi   | WWP2             |       |
|     | 26.4873 | 24.7497 | 25.6094 | 26.6968 | 25.5675 | 25.9278 | NaN     | NaN     | NaN     | 23.0303 | 25.3612 | 26.0543 | 25.4387                                        | Q9HCS7                          | Q9HCS7              | Pre-mRNA-splicin | XAB2  |
|     | 27.2803 | 26.9409 | 27.0073 | 26.7335 | 26.8401 | 27.0648 | 27.2496 | 26.7946 | 26.9007 | 26.9915 | 26.6867 | 27.1002 | Q9NQW7;Q9NQW Q9NQW7;Q9NQW                      | Xaa-Pro aminope                 | XPNPEP1             |                  |       |
|     | 27.7967 | 27.3896 | 27.795  | 27.8367 | 27.515  | 27.7806 | 27.7833 | 27.7979 | 28.031  | 27.9931 | 27.8392 | 28.2353 | O14980;C9JMK9;C                                | O14980                          | Exportin-1          | XPO1             |       |
|     | 23.2147 | 22.4506 | 22.8832 | 22.9151 | 22.8484 | NaN     | NaN     | NaN     | NaN     | 22.9245 | 23.7221 | NaN     | Q9COE2;F2Z2X4                                  | Q9COE2;F2Z2X4                   | Exportin-4          | XPO4             |       |
|     | 28.389  | 26.7236 | 27.5861 | 28.325  | 27.1912 | 27.7292 | 26.7739 | 27.1086 | 26.8053 | 27.8614 | 27.5013 | 27.3272 | Q9HAV4;E2QRM3 Q9HAV4                           |                                 | Exportin-5          | XPO5             |       |
|     | 27.5913 | 26.0874 | 26.7048 | 27.3069 | 26.5633 | 27.0128 | 26.5237 | 26.363  | 26.2398 | 27.3857 | 27.0767 | 26.4295 | Q9UIA9;E7ESC6;H Q9UIA9;E7ESC6                  |                                 | Exportin-7          | XPO7             |       |
|     | 25.7733 | 24.2773 | 24.997  | 25.1969 | 25.332  | 24.4251 | 24.6968 | 24.985  | 24.6618 | 24.9518 | 25.1026 | NaN     | Q43592;F8WDU6; Q43592                          |                                 | Exportin-T          | XPOT             |       |
|     | 22.5234 | NaN     | 22.1479 | 22.5543 | 21.9323 | NaN     | NaN     | NaN     | NaN     | 23.3176 | NaN     | NaN     | Q9UBH6;Q9UBH6 Q9UBH6;Q9UBH6                    | Xenotropic and pc               | XPR1                |                  |       |
| NaN | NaN     | NaN     | 21.351  | 21.6096 | NaN     | NaN     | NaN     | NaN     | NaN     | 20.9998 | 20.9171 | NaN     | Q13426;Q13426-2 Q13426;Q13426-2                | DNA repair protei               | XRCC4               |                  |       |
|     | 29.7224 | 29.436  | 29.3548 | 29.7975 | 29.902  | 29.6943 | 28.6885 | 28.5321 | 28.7197 | 29.7946 | 30.0335 | 29.3044 | P13010;C9JZ81;H                                | P13010                          | X-ray repair cross- | XRCC5            |       |
|     | 29.3679 | 29.2961 | 29.3786 | 29.8288 | 29.4793 | 29.6961 | 29.1722 | 29.1014 | 28.455  | 29.6547 | 29.8852 | 29.5207 | P12956;B1AHC9;F                                | P12956;B1AHC9;F                 | X-ray repair cross- | XRCC6            |       |
|     | 25.6109 | NaN     | 25.2543 | 25.7849 | 25.8928 | 25.851  | NaN     | NaN     | NaN     | 25.421  | 24.9088 | NaN     | Q8IZH2;Q8IZH2-2 Q8IZH2;Q8IZH2-2                | 5-3 exoribonuclea               | XRN1                |                  |       |
|     | 26.8086 | 26.0981 | 26.768  | 27.1406 | 26.6009 | 26.7352 | 25.7365 | 25.6252 | 26.4699 | 27.125  | 27.2554 | 27.3241 | Q9H0D6;Q9H0D6 Q9H0D6;Q9H0D6                    | 5-3 exoribonuclea               | XRN2                |                  |       |
| NaN | NaN     | NaN     | NaN     | NaN     | NaN     | NaN     | NaN     | NaN     | NaN     | 24.9172 | 23.972  | NaN     | O75191;O75191-2 O75191;O75191-2                | Xylulose kinase                 | XYLB                |                  |       |
|     | 26.072  | 26.9517 | 26.3049 | 25.4797 | 26.3921 | 25.8819 | 25.3562 | 25.944  | 26.116  | 24.2398 | 25.2563 | 25.8565 | P46937;P46937-2 P46937;P46937-2                | Transcriptional co              | YAP1                |                  |       |
|     | 29.1351 | 28.3985 | 28.3289 | 28.7866 | 28.2597 | 28.3454 | 27.8966 | 27.5711 | 27.3097 | 27.916  | 27.6623 | 27.3558 | P54577;A0A0C4D P54577;A0A0C4D                  | Tyrosine--tRNA lig              | YARS                |                  |       |
|     | 24.9642 | 24.0003 | 24.073  | 25.011  | 24.014  | 24.0429 | NaN     | NaN     | NaN     | 23.8968 | 24.0008 | NaN     | Q9Y224;H0YHS6                                  | Q9Y224;H0YHS6                   | Tyrosine--tRNA lig  | YARS2            |       |
|     | 30.0316 | 29.1182 | 29.216  | 29.5115 | 28.6687 | 28.7455 | 28.9406 | 30.0704 | 28.7201 | 28.5695 | 28.6975 | 28.6772 | P67809;A0A087X P67809;A0A087X                  | Nuclease-sensitiv               | YBX1                |                  |       |
|     | 23.7606 | NaN     | NaN     | 23.5507 | NaN     | P16989;P16989-2 P16989;P16989-2                | Y-box-binding pro               | YBX3                |                  |       |
|     | 29.5284 | 29.2743 | 29.9144 | 29.5544 | 29.2055 | 30.018  | 29.6744 | 29.2569 | 29.4927 | 30.5948 | 30.07   | 29.9646 | P07947;J3QRU1;P                                | P07947;J3QRU1                   | Tyrosine-protein t  | YES1             |       |
| NaN | NaN     | NaN     | 23.0021 | 22.7605 | NaN     | NaN     | NaN     | NaN     | NaN     | 22.5513 | 23.0021 | NaN     | O95070;A6NGW1 O95070;A6NGW1                    | Protein YIF1A                   | YIF1A               |                  |       |
| NaN | NaN     | NaN     | NaN     | 22.7145 | NaN     | Q5BJH7;Q5BJH7-ε Q5BJH7;Q5BJH7-ε                | Protein YIF1B                   | YIF1B               |                  |       |
|     | 24.8147 | 24.4011 | 24.4807 | 24.5527 | 23.5601 | 24.173  | 24.0318 | 23.7285 | NaN     | 23.7396 | 23.3449 | 23.8503 | Q9GZM5;D6RFI3;Q                                | Q9GZM5;D6RFI3;Q                 | Protein YIPF3;Pro   | YIPF3            |       |
|     | 23.9668 | 22.9862 | 23.0256 | 23.5193 | 23.1714 | NaN     | NaN     | NaN     | NaN     | NaN     | NaN     | 22.8581 | NaN                                            | Q9BSR8;H7COD5                   | Q9BSR8;H7COD5       | Protein YIPF4    | YIPF4 |
|     | 23.5816 | 23.072  | 23.734  | 23.4736 | 22.8747 | NaN                                            | Q969M3;Q969M3 Q969M3;Q969M3     | Protein YIPF5;Pro   | YIPF5            |       |
|     | 24.8333 | 24.3582 | 25.0325 | 25.1341 | 24.3149 | 25.1172 | 24.5301 | NaN     | 25.0795 | 24.5661 | 24.3153 | 24.6799 | Q96EC8;Q96EC8-2 Q96EC8;Q96EC8-2                | Protein YIPF6;Pro               | YIPF6               |                  |       |
|     | 24.7789 | 24.5275 | 25.0611 | 24.6038 | 24.1335 | 24.9121 | 25.107  | NaN     | 24.3612 | 25.2265 | 23.8391 | 23.7455 | O15498;O15498-2 O15498;O15498-2                | Synaptobrevin ho                | YKT6                |                  |       |
|     | 24.2189 | 24.528  | 24.0826 | 24.1629 | 24.2293 | 24.2433 | NaN     | NaN     | NaN     | 24.0397 | 24.5715 | 25.9641 | P49750-4;P49750 P49750-4;P49750                | YLP motif-contain               | YLPM1               |                  |       |
| NaN | NaN     | NaN     | NaN     | 21.1941 | NaN     | Q96TA2;Q96I63;C                                | Q96TA2;Q96I63;C                 | ATP-dependent z     | YME1L1           |       |
|     | 23.534  | 23.0506 | 23.0465 | 23.4733 | 23.4969 | 23.3631 | 23.1219 | NaN     | NaN     | 23.5088 | NaN     | NaN     | P62699                                         | P62699                          | Protein yippee-lik  | YPEL5            |       |
|     | 23.638  | NaN     | 23.1026 | 23.3195 | NaN     | NaN     | NaN     | NaN     | NaN     | 22.9426 | 23.2075 | NaN     | Q86U90                                         | Q86U90                          | YrdC domain-cont    | YRDC             |       |
|     | 25.7724 | 24.7668 | 25.3191 | 25.6187 | 25.3489 | 25.5587 | NaN     | NaN     | NaN     | 24.5397 | 25.4875 | 25.1021 | Q96MU7;Q96MU Q96MU7;Q96MU                      | YTH domain-cont                 | YTHDC1              |                  |       |
|     | 24.1474 | 22.8243 | 23.3211 | 24.3442 | 23.7228 | NaN     | NaN     | NaN     | NaN     | 23.1619 | 23.5906 | NaN     | Q9H650;D6RA70;Q                                | Q9H650                          | Probable ATP-dep    | YTHDC2           |       |
|     | 26.6891 | 25.8822 | 26.2144 | 26.5582 | 25.9361 | 26.1467 | 25.5016 | 25.4016 | NaN     | 26.1107 | 26.0564 | NaN     | Q9BYJ9;Q9BYJ9-2 Q9BYJ9                         |                                 | YTH domain-cont     | YTHDF1           |       |
| NaN | NaN     | NaN     | NaN     | NaN     | NaN     | NaN     | NaN     | NaN     | NaN     | NaN     | NaN     | NaN     | Q7Z739;A0A087X Q7Z739;A0A087X                  | YTH domain-cont                 | YTHDF3              |                  |       |
|     | 30.8011 | 32.191  | 31.8919 | 30.9439 | 31.8533 | 31.754  | 32.0116 | 31.835  | 31.6862 | 32.0483 | 31.8716 | 31.9116 | P31946;Q4VY19;A                                | P31946;Q4VY19;A                 | 14-3-3 protein      | bel YWHAB        |       |
| NaN |         | 27.2186 | 26.6227 | NaN     | 28.9183 | 26.8247 | NaN     | 30.1109 | 30.3735 | NaN     |         | 30.5449 | P31946-2                                       |                                 | 14-3-3 protein      | bel YWHAB        |       |
|     | 31.6353 | 31.8085 | 31.7956 | 31.371  | 31.1887 | 31.6556 | 32.3846 | 30.941  | 31.1542 | 32.1178 | 31.639  | 31.6779 | P62258;P62258-2 P62258;P62258-2                |                                 | 14-3-3 protein      | ep YWHA          |       |
|     | 29.4053 | 30.3214 | 30.1634 | 29.2033 | 29.9954 | 30.1382 | 30.3495 | 30.2059 | 30.4232 | 30.0223 | 30.2418 | 30.7375 | P61981                                         | P61981                          | 14-3-3 protein      | gar YWHAG        |       |
|     | 29.1888 | 29.7347 | 29.3911 | 28.6261 | 29.1531 | 29.4553 | 29.7885 | 29.2829 | 29.3844 | 29.3853 | 29.3236 | 29.2403 | Q04917;A2IDB2;F                                | Q04917;A2IDB2                   | 14-3-3 protein      | et YWHAH         |       |
|     | 31.093  | 31.0341 | 31.1578 | 30.7377 | 30.4195 | 31.0927 | 31.6028 | 31.0924 | 30.6507 | 31.5263 | 30.9259 | 30.6364 | P27348;E9PG15 P27348;E9PG15                    |                                 | 14-3-3 protein      | the YWHAQ        |       |
|     | 32.8875 | 33.7121 | 33.5018 | 32.7135 | 33.2562 | 33.3932 | 34.4579 | 33.6792 | 33.4146 | 33.6642 | 33.4912 | 33.465  | P63104;E7EX29;E                                | P63104;E7EX29;E                 | 14-3-3 protein      | zet YWHAZ        |       |
|     | 22.4606 | 22.6445 | 22.8481 | 23.0372 | 22.8702 | NaN     | P25490;H0YJV7;O                                | P25490;H0YJV7                   | Transcriptional r   | YY1              |       |



|     |         |         |         |         |         |         |         |         |         |         |         |         |                 |                 |                                       |
|-----|---------|---------|---------|---------|---------|---------|---------|---------|---------|---------|---------|---------|-----------------|-----------------|---------------------------------------|
|     | 26.5231 | 25.4653 | 25.6668 | 25.9084 | 24.9243 | 25.2116 | 24.7143 | 24.7923 | 24.4722 | 26.1448 | 25.669  | 24.726  | Q9NYL2          | Q9NYL2          | Mitogen-activator ZAK                 |
|     | 23.7261 | NaN     | 22.3937 | 22.9013 | NaN     | 22.9775 | NaN     | NaN     | NaN     | 22.3675 | NaN     | NaN     | Q9NYL2-2;D4Q8H  | Q9NYL2-2;D4Q8H  | Mitogen-activator ZAK;pk              |
|     | 22.638  | NaN     | 22.9436 | 23.023  | NaN     | NaN     | NaN     | NaN     | NaN     | 22.9924 | NaN     | NaN     | O75152;E9PBY7;E | O75152;E9PBY7;E | Zinc finger CCHC c ZC3H11A            |
|     | 23.7942 | 24.2902 | 24.5811 | 24.5923 | 24.1416 | 24.4469 | NaN     | NaN     | NaN     | 23.9808 | 24.6877 | 24.1591 | Q8WU90;Q8WU9    | Q8WU90;Q8WU9    | Zinc finger CCHC c ZC3H15             |
|     | 24.3878 | 24.6633 | 24.1723 | 24.5865 | 24.7232 | 24.1194 | NaN     | NaN     | NaN     | 24.1639 | 24.7707 | 24.5194 | Q86VM9;E7ERS3;  | Q86VM9;E7ERS3;  | Zinc finger CCHC c ZC3H18             |
| NaN | NaN     | NaN     | 21.0732 | 21.443  | NaN     | Q9UGR2;Q9UGR2   | Q9UGR2;Q9UGR2   | Zinc finger CCHC c ZC3H7B             |
|     | 27.4584 | 27.1662 | 27.0175 | 27.456  | 27.395  | 27.3713 | 27.0158 | 26.6732 | 27.294  | 27.2963 | 27.0446 | 27.0361 | Q722W4;C9J6P4;C | Q722W4;C9J6P4;C | Zinc finger CCHC c ZC3HAV1            |
|     | 23.8848 | 23.9009 | 23.735  | 24.4191 | 24.0971 | 24.0378 | 24.1726 | NaN     | 23.3005 | 24.9889 | NaN     | 24.0755 | Q96H79;Q96H79   | Q96H79          | Zinc finger CCHC c ZC3HAV1L           |
|     | 25.9728 | 22.7636 | 23.3899 | 24.7676 | 22.3272 | 23.1596 | NaN     | 23.9185 | NaN     | 22.4249 | 22.8466 | NaN     | Q5VYS8;Q5VYS8-ε | Q5VYS8;Q5VYS8-ε | Terminal uridylyl transferase ZCCHC6  |
|     | 23.5314 | NaN     | 22.694  | 22.7426 | 22.2367 | NaN     | NaN     | NaN     | NaN     | 22.5223 | NaN     | NaN     | Q6NZY4;Q6NZY4-; | Q6NZY4;Q6NZY4-; | Zinc finger CCHC c ZCCHC8             |
|     | 22.863  | 22.5504 | 22.4242 | 22.3919 | 22.2507 | NaN     | 22.3534 | 22.4255 | NaN     | NaN     | NaN     | NaN     | Q8IUH5;H0YIK0;Q | Q8IUH5;H0YIK0;Q | Palmitoyltransferase ZDHHC17          |
|     | 22.8343 | 22.968  | 23.0487 | 22.8749 | NaN     | NaN     | NaN     | 23.1309 | NaN     | 23.2004 | 23.3738 | 22.7612 | Q9NUE0;H0YEN1;  | Q9NUE0          | Palmitoyltransferase ZDHHC18          |
|     | 26.278  | 26.3325 | 26.6524 | 26.0951 | 25.9102 | 26.5423 | 25.4031 | 24.8177 | 26.2311 | 26.5818 | 25.9036 | 26.3028 | Q5W029;B4DRN8   | Q5W029;B4DRN8   | Probable palmitoyltransferase ZDHHC20 |
|     | 27.1523 | 27.914  | 27.9151 | 26.5505 | 27.1632 | 27.2736 | 27.4936 | 27.1023 | 27.7885 | 27.147  | 26.6497 | 27.5714 | Q9C0B5;Q9C0B5-; | Q9C0B5;Q9C0B5-; | Palmitoyltransferase ZDHHC5           |
| NaN | NaN     | NaN     | NaN     | NaN     | NaN     | NaN     | NaN     | NaN     | NaN     | 22.2646 | NaN     | NaN     | Q9ULC8;Q9ULC8-  | Q9ULC8;Q9ULC8-  | Probable palmitoyltransferase ZDHHC8  |
|     | 22.1983 | NaN     | Q07352;G3V2D5;C | Q07352;G3V2D5;C | Zinc finger protein ZFP36L1           |
|     | 22.9204 | NaN     | NaN     | 23.8196 | NaN     | NaN     | NaN     | NaN     | 22.974  | 23.4681 | NaN     | NaN     | O95159;E9PQA5;C | O95159;E9PQA5;C | Zinc finger protein ZFP1              |
|     | 24.2282 | 23.9684 | 23.8371 | 24.4059 | 24.1558 | 23.7554 | NaN     | NaN     | NaN     | 23.9723 | 24.4461 | NaN     | Q96KR1;H0Y8W1;  | Q96KR1          | Zinc finger RNA-binding ZFR           |
|     | 24.7523 | 24.2413 | 23.8681 | 23.7515 | 23.7388 | 23.788  | 24.1794 | NaN     | NaN     | 23.6038 | 23.9958 | NaN     | Q9HBF4;G3V5N8;  | Q9HBF4;G3V5N8;  | Zinc finger FYVE d ZFYVE1             |
|     | 22.6531 | NaN     | Q7Z3T8;Q7Z3T8-3 | Q7Z3T8;Q7Z3T8-3 | Zinc finger FYVE d ZFYVE16            |
|     | 23.54   | 23.8925 | 24.3155 | 23.2894 | 23.7012 | 24.4164 | 23.7841 | 24.5406 | 24.5709 | 23.2305 | 23.9354 | NaN     | Q96K21;H3BRF9;C | Q96K21;H3BRF9;C | Abscission/NoCut ZFYVE19              |
|     | 20.0577 | NaN     | Q9BQ24;Q9BQ24-  | Q9BQ24;Q9BQ24-  | Zinc finger FYVE d ZFYVE21            |
|     | 20.7723 | NaN     | Q68DK2;Q68DK2-  | Q68DK2;Q68DK2-  | Zinc finger FYVE d ZFYVE26            |
|     | 24.024  | NaN     | NaN     | NaN     | 23.0725 | NaN     | Q8N5A5;V9GY48;  | Q8N5A5;V9GY48;  | Zinc finger CCHC c ZGPAT              |
|     | 24.8259 | 24.4023 | 25.0104 | 25.2712 | 24.5883 | 24.993  | 25.7312 | 25.6901 | 26.4323 | 25.5795 | 25.2716 | 25.8728 | O75844          | O75844          | CAAX prenyl transferase ZMPSTE24      |
| NaN | NaN     | NaN     | NaN     | NaN     | NaN     | NaN     | NaN     | NaN     | NaN     | 22.2213 | NaN     | NaN     | Q9ULU4;Q9ULU4-  | Q9ULU4;Q9ULU4-  | Protein kinase C-β ZMYND8             |
| NaN |         | 23.3449 | 23.2522 | NaN     | 23.4889 | 23.4952 | NaN     | NaN     | NaN     | NaN     | 22.958  | NaN     | O15231;O15231-4 | O15231;O15231-4 | Zinc finger protein ZNF185            |
| NaN | NaN     | NaN     | 24.69   | NaN     | O15231-2        | O15231-2        | Zinc finger protein ZNF185            |
|     | 27.6473 | 28.6126 | 28.7586 | 27.6442 | 28.4443 | 28.8635 | 27.4898 | 27.3754 | 27.3179 | 27.9937 | 28.0861 | 28.2987 | O15231-3;H0Y704 | O15231-3;H0Y704 | Zinc finger protein ZNF185            |
|     | 24.5938 | 24.5913 | 23.9668 | 24.473  | 24.3447 | 24.3623 | 23.6309 | NaN     | NaN     | NaN     | NaN     | NaN     | O43670;O43670-2 | O43670;O43670-2 | BUB3-interacting ZNF207               |
|     | 23.9724 | 23.91   | 24.0429 | 24.2372 | 24.0772 | 24.0935 | NaN     | NaN     | NaN     | 24.0148 | 24.1877 | 24.1453 | Q5BKZ1;A0A0A0N  | Q5BKZ1          | DBIRD complex subunit ZNF326          |
|     | 24.0977 | 24.0241 | 24.3422 | 24.5698 | 24.3487 | 23.9575 | NaN     | NaN     | NaN     | 24.308  | 24.444  | NaN     | Q8NB15;Q8NB15-  | Q8NB15;Q8NB15-  | Zinc finger protein ZNF511            |
|     | 25.1984 | 24.2654 | 24.5942 | 25.2089 | 24.0943 | 24.3697 | 24.1961 | 24.0999 | NaN     | 24.4367 | 24.2401 | 24.4554 | Q96953          | Q96953          | Zinc finger protein ZNF622            |
|     | 27.6486 | 23.0521 | 24.7809 | 28.8018 | 28.5506 | NaN     | NaN     | 29.7657 | 32.2774 | NaN     | 30.2147 | 31.7101 | Q14966;Q14966-4 | Q14966;Q14966-4 | Zinc finger protein ZNF638            |
| NaN | NaN     | NaN     | NaN     | 25.0576 | NaN     | Q0VGE8          | Q0VGE8          | Zinc finger protein ZNF816            |
|     | 22.1995 | 22.1509 | 21.9584 | 22.9495 | NaN     | 22.0311 | NaN     | NaN     | NaN     | 22.3574 | NaN     | NaN     | Q9P2E3;Q5JXR6;C | Q9P2E3;Q5JXR6;C | NFX1-type zinc finger ZNF1            |
|     | 22.0819 | NaN     | Q8NHG8          | Q8NHG8          | E3 ubiquitin-protein ZNRF2            |
|     | 26.3744 | 26.9965 | 26.4891 | 26.2712 | 26.8458 | 26.0986 | 26.7343 | 26.2151 | 26.6016 | 26.3458 | 26.3432 | 26.9599 | O75312;H7C0E5;C | O75312;H7C0E5;C | Zinc finger protein ZPR1              |
|     | 22.0198 | NaN     | 21.4679 | 21.621  | NaN     | 21.7631 | NaN     | NaN     | NaN     | NaN     | NaN     | NaN     | A7E2V4;H7BZ52;S | A7E2V4;H7BZ52;S | Zinc finger SWIM domain ZSWIM8        |
|     | 25.7899 | 25.345  | 25.8186 | 25.9916 | 25.7789 | 25.6877 | 25.5834 | 26.1878 | 25.1558 | 25.8567 | 25.7875 | 25.9267 | O43264;O43264-2 | O43264;O43264-2 | Centromere/kinetochore ZW10           |
|     | 23.9242 | 23.2558 | 23.4722 | 23.5185 | 23.6506 | NaN     | 23.921  | 24.2318 | NaN     | 23.6539 | 23.7259 | 23.7591 | Q9H900;Q9H900-  | Q9H900;Q9H900-  | Protein zwilch homolog ZWLCH          |
|     | 21.9667 | 22.268  | 22.3281 | 22.0492 | 21.8981 | NaN     | O95229;O95229-2 | O95229;O95229-2 | ZW10 interactor ZWINT                 |
| NaN | NaN     | NaN     | NaN     | 21.8068 | NaN     | Q9C0D3;A8DPD7   | Q9C0D3;A8DPD7   | Protein zyg-11 homolog ZYG11B         |
|     | 26.5263 | 27.2822 | 26.9121 | 26.1847 | 27.334  | 26.8748 | 26.7535 | 27.2245 | 26.9024 | 26.3877 | 26.6334 | 27.3546 | Q15942;H0Y2Y8;C | Q15942;H0Y2Y8;C | Zyxin ZYX                             |
| NaN | NaN     | NaN     | NaN     | NaN     | NaN     | NaN     | NaN     | NaN     | NaN     | 19.814  | NaN     | NaN     | O43149          | O43149          | Zinc finger ZZ-type ZZEF1             |
|     | 27.7958 | 27.4612 | 27.9247 | 27.3566 | 27.6848 | 26.8965 | 27.9494 | 27.4398 | 27.5699 | 28.0121 | NaN     | 27.8338 | A0A0U1RQN6      | A0A0U1RQN6      |                                       |
| NaN | NaN     | NaN     | NaN     | NaN     | NaN     | NaN     | NaN     | NaN     | NaN     | NaN     | NaN     | 28.2352 | A4GXA9-2        | A4GXA9-2        |                                       |
|     | 27.1928 | 27.9985 | 27.2395 | 27.4371 | 28.1899 | 27.6156 | 26.0963 | NaN     | 27.5096 | 26.621  | 27.1219 | 26.9463 | B4DLN1;F6QW41   | B4DLN1          |                                       |
|     | 25.7932 | 25.7403 | 27.0376 | 26.552  | 26.5982 | 27.5303 | 26.6958 | 26.9113 | 26.5823 | 27.8702 | 27.147  | 26.7475 | H3BN98;Q15041;I | H3BN98          |                                       |
| NaN | NaN     | 23.4549 | 23.0162 | NaN     | 24.338  | NaN     | NaN     | NaN     | 25.1427 | NaN     | 22.9143 | NaN     | MOQYT0;MOR076   | MOQYT0          |                                       |
| NaN | NaN     | NaN     | NaN     | 24.6428 | NaN     | P05112-2        | P05112-2        |                                       |
